# Supplementary material for: Transcriptome dynamics uncovers long non-coding RNAs response to salinity stress in Chenopodium quinoa
Source: Front Plant Sci. 2022 Sep 20;13:988845. doi: 10.3389/fpls.2022.988845 (PMC9530330; doi:10.3389/fpls.2022.988845)
Supplement: Supplementary file 1 [file Table_1.XLSX]

## Sheet: Sheet1
Table S1 Summary of RNA Sequencing results
	Raw reads	Clean reads	Total mapped reads	Mapping percent
0h-1Control	41372432	38675420	36032693	0.931669
0h-2Control	34818686	32628024	29579410	0.906565
0h-3Control	39909760	36947194	32826635	0.888474
0.5h-1Salt	34203374	31884494	29853406	0.936299
0.5h-2Salt	33592274	31729298	30559907	0.963145
0.5h-3Salt	37889806	34999762	33043846	0.944116
2h-1Salt	42066548	39013292	37040634	0.949436
2h-2Salt	35451470	30816796	29444286	0.955462
2h-3Salt	43247126	39944670	37423235	0.936877
24h-1Salt	41228964	38431186	23821486	0.619848
24h-2Salt	38980168	36426438	28759458	0.789522
24h-3Salt	41151640	38709326	20384574	0.526606
