# Supplementary material for: Transcriptome dynamics uncovers long non-coding RNAs response to salinity stress in Chenopodium quinoa
Source: Front Plant Sci. 2022 Sep 20;13:988845. doi: 10.3389/fpls.2022.988845 (PMC9530330; doi:10.3389/fpls.2022.988845)
Supplement: Supplementary file 2 [file Table_2.XLSX]

## Sheet: Sheet1
Table S2 Annotation of assembled transcripts.
Transcript_id	Gene_id	ref_gene_id	ref_id	Chr	Start	End	class_code	Description
MSTRG.1.1	MSTRG.1	-	-	Chr00	142149	142481	u	-
MSTRG.2.1	MSTRG.2	-	-	Chr00	156267	156629	u	-
MSTRG.3.1	MSTRG.3	-	-	Chr00	188061	188508	u	-
MSTRG.4.1	MSTRG.4	-	-	Chr00	155282	155670	u	-
MSTRG.5.1	MSTRG.5	-	-	Chr00	148480	148956	u	-
MSTRG.6.1	MSTRG.6	-	-	Chr00	192240	192637	u	-
MSTRG.7.1	MSTRG.7	-	-	Chr00	166259	166524	u	-
MSTRG.8.1	MSTRG.8	-	-	Chr00	163844	164295	u	-
MSTRG.9.1	MSTRG.9	-	-	Chr00	181983	182475	u	-
MSTRG.10.1	MSTRG.10	-	-	Chr00	194464	194800	u	-
MSTRG.11.1	MSTRG.11	-	-	Chr00	206444	206701	u	-
MSTRG.12.1	MSTRG.12	AUR62043415	AUR62043415-RA	Chr00	166891	174378	j	CONTAINS InterPro DOMAIN/s: Nucleic acid-binding, OB-fold-like (InterPro:IPR016027), Protein of unknown function DUF171 (InterPro:IPR003750); Has 3649 Blast hits to 1964 proteins in 291 species: Archae - 113; Bacteria - 121; Metazoa - 1082; Fungi - 399; Plants - 227; Viruses - 4; Other Eukaryotes - 1703 (source: NCBI BLink).
AUR62043415-RA	MSTRG.12	AUR62043415	AUR62043415-RA	Chr00	167142	174378	=	CONTAINS InterPro DOMAIN/s: Nucleic acid-binding, OB-fold-like (InterPro:IPR016027), Protein of unknown function DUF171 (InterPro:IPR003750); Has 3649 Blast hits to 1964 proteins in 291 species: Archae - 113; Bacteria - 121; Metazoa - 1082; Fungi - 399; Plants - 227; Viruses - 4; Other Eukaryotes - 1703 (source: NCBI BLink).
MSTRG.12.3	MSTRG.12	AUR62043415	AUR62043415-RA	Chr00	168840	174378	j	CONTAINS InterPro DOMAIN/s: Nucleic acid-binding, OB-fold-like (InterPro:IPR016027), Protein of unknown function DUF171 (InterPro:IPR003750); Has 3649 Blast hits to 1964 proteins in 291 species: Archae - 113; Bacteria - 121; Metazoa - 1082; Fungi - 399; Plants - 227; Viruses - 4; Other Eukaryotes - 1703 (source: NCBI BLink).
MSTRG.13.1	MSTRG.13	AUR62043415	AUR62043415-RA	Chr00	170721	171391	i	-
MSTRG.14.1	MSTRG.14	-	-	Chr00	234859	235220	u	-
MSTRG.15.1	MSTRG.15	-	-	Chr00	261830	262118	u	-
MSTRG.16.1	MSTRG.16	AUR62043416	AUR62043416-RA	Chr00	212712	225214	j	kinase associated protein phosphatase
AUR62043416-RA	MSTRG.16	AUR62043416	AUR62043416-RA	Chr00	213145	226846	=	kinase associated protein phosphatase
MSTRG.16.3	MSTRG.16	AUR62043416	AUR62043416-RA	Chr00	213313	225214	j	kinase associated protein phosphatase
MSTRG.17.1	MSTRG.17	-	-	Chr00	440138	440398	u	-
MSTRG.18.1	MSTRG.18	-	-	Chr00	378671	379021	u	-
MSTRG.19.1	MSTRG.19	-	-	Chr00	263916	264259	u	-
MSTRG.20.1	MSTRG.20	AUR62043421	AUR62043421-RA	Chr00	257294	260446	j	DNA polymerase epsilon subunit B2
AUR62043421-RA	MSTRG.20	AUR62043421	AUR62043421-RA	Chr00	257294	259473	=	DNA polymerase epsilon subunit B2
MSTRG.20.3	MSTRG.20	AUR62043421	AUR62043421-RA	Chr00	257331	260446	j	DNA polymerase epsilon subunit B2
MSTRG.20.4	MSTRG.20	AUR62043421	AUR62043421-RA	Chr00	259242	260446	j	DNA polymerase epsilon subunit B2
MSTRG.21.1	MSTRG.21	-	-	Chr00	568763	569053	u	-
MSTRG.22.1	MSTRG.22	AUR62044361	AUR62044361-RA	Chr00	625563	628247	m	SOS3-interacting protein 4
AUR62044361-RA	MSTRG.22	AUR62044361	AUR62044361-RA	Chr00	626700	628247	=	SOS3-interacting protein 4
MSTRG.23.1	MSTRG.23	-	-	Chr00	652405	655981	u	-
MSTRG.24.1	MSTRG.24	AUR62044362	AUR62044362-RA	Chr00	630987	631582	x	allergen-related
AUR62044362-RA	MSTRG.25	AUR62044362	AUR62044362-RA	Chr00	631358	640712	=	allergen-related
MSTRG.25.2	MSTRG.25	AUR62044362	AUR62044362-RA	Chr00	632560	632965	i	-
MSTRG.25.3	MSTRG.25	AUR62044362	AUR62044362-RA	Chr00	639234	640712	j	-
MSTRG.26.1	MSTRG.26	-	-	Chr00	705690	706047	u	-
MSTRG.27.1	MSTRG.27	-	-	Chr00	893354	894367	u	-
AUR62044736-RA	MSTRG.28	AUR62044736	AUR62044736-RA	Chr00	907289	909177	=	nuclear pore anchor
MSTRG.29.1	MSTRG.29	-	-	Chr00	922844	923105	u	-
MSTRG.30.1	MSTRG.30	-	-	Chr00	925613	926506	u	-
MSTRG.31.1	MSTRG.31	-	-	Chr00	933239	933716	u	-
MSTRG.32.1	MSTRG.32	-	-	Chr00	1088835	1089187	u	-
MSTRG.33.1	MSTRG.33	-	-	Chr00	1093691	1094040	u	-
MSTRG.34.1	MSTRG.34	-	-	Chr00	1256588	1256874	u	-
MSTRG.35.1	MSTRG.35	-	-	Chr00	1292069	1292416	u	-
MSTRG.36.1	MSTRG.36	-	-	Chr00	1304028	1304387	u	-
MSTRG.37.1	MSTRG.37	-	-	Chr00	1308136	1308551	u	-
MSTRG.38.1	MSTRG.38	-	-	Chr00	1310463	1310740	u	-
MSTRG.39.1	MSTRG.39	-	-	Chr00	1491034	1491360	u	-
MSTRG.40.1	MSTRG.40	-	-	Chr00	1397225	1397533	u	-
MSTRG.41.1	MSTRG.41	-	-	Chr00	1488057	1488560	u	-
MSTRG.42.1	MSTRG.42	-	-	Chr00	1611725	1612031	u	-
MSTRG.43.1	MSTRG.43	-	-	Chr00	1649310	1649718	u	-
AUR62044180-RA	MSTRG.44	AUR62044180	AUR62044180-RA	Chr00	1497593	1502796	=	Exostosin family protein
MSTRG.45.1	MSTRG.45	AUR62044180	AUR62044180-RA	Chr00	1502358	1502566	i	-
MSTRG.46.1	MSTRG.46	-	-	Chr00	1657565	1658932	u	-
MSTRG.47.1	MSTRG.47	-	-	Chr00	1756914	1757386	u	-
MSTRG.48.1	MSTRG.48	-	-	Chr00	1810576	1810793	u	-
MSTRG.49.1	MSTRG.49	-	-	Chr00	1817253	1817458	u	S-domain-1 13
MSTRG.50.1	MSTRG.50	-	-	Chr00	1814388	1815018	u	-
MSTRG.51.1	MSTRG.51	-	-	Chr00	1815192	1815436	u	-
AUR62044009-RA	MSTRG.52	AUR62044009	AUR62044009-RA	Chr00	1797204	1801946	=	-
MSTRG.52.2	MSTRG.52	AUR62044009	AUR62044009-RA	Chr00	1797209	1805066	j	S-adenosyl-L-methionine-dependent methyltransferases superfamily protein
MSTRG.53.1	MSTRG.53	-	-	Chr00	1900967	1901328	u	-
MSTRG.54.1	MSTRG.54	-	-	Chr00	2006737	2007526	u	-
MSTRG.55.1	MSTRG.55	-	-	Chr00	1823836	1824041	u	S-domain-1 13
MSTRG.56.1	MSTRG.56	-	-	Chr00	1821301	1822007	u	-
MSTRG.57.1	MSTRG.57	AUR62044154	AUR62044154-RA	Chr00	2061923	2062282	p	-
MSTRG.58.1	MSTRG.58	-	-	Chr00	2064772	2065015	u	-
MSTRG.59.1	MSTRG.59	-	-	Chr00	2065835	2066094	u	-
MSTRG.60.1	MSTRG.60	AUR62044154	AUR62044154-RA	Chr00	2057631	2061026	j	unknown protein; Has 30201 Blast hits to 17322 proteins in 780 species: Archae - 12; Bacteria - 1396; Metazoa - 17338; Fungi - 3422; Plants - 5037; Viruses - 0; Other Eukaryotes - 2996 (source: NCBI BLink).
AUR62044154-RA	MSTRG.60	AUR62044154	AUR62044154-RA	Chr00	2057709	2061026	=	-
MSTRG.61.1	MSTRG.61	AUR62044154	AUR62044154-RA	Chr00	2060037	2060733	x	-
MSTRG.62.1	MSTRG.62	-	-	Chr00	2176219	2176838	u	-
AUR62044155-RA	MSTRG.63	AUR62044155	AUR62044155-RA	Chr00	2067092	2075794	=	SOUL heme-binding family protein
MSTRG.64.1	MSTRG.64	AUR62044155	AUR62044155-RA	Chr00	2067988	2068789	x	-
MSTRG.65.1	MSTRG.65	AUR62044155	AUR62044155-RA	Chr00	2072172	2072772	i	-
MSTRG.66.1	MSTRG.66	-	-	Chr00	2470770	2471064	u	-
MSTRG.67.1	MSTRG.67	-	-	Chr00	2433238	2433524	u	-
MSTRG.68.1	MSTRG.68	-	-	Chr00	2446886	2447208	u	-
MSTRG.69.1	MSTRG.69	-	-	Chr00	2185267	2185572	u	-
MSTRG.70.1	MSTRG.70	-	-	Chr00	2477286	2478256	u	-
MSTRG.71.1	MSTRG.71	-	-	Chr00	2560315	2560811	u	-
MSTRG.72.1	MSTRG.72	-	-	Chr00	2564988	2567770	u	-
MSTRG.73.1	MSTRG.73	-	-	Chr00	2568150	2568390	u	-
MSTRG.74.1	MSTRG.74	-	-	Chr00	2574471	2574780	u	-
MSTRG.75.1	MSTRG.75	AUR62044662	AUR62044662-RA	Chr00	2578172	2579045	p	-
MSTRG.76.1	MSTRG.76	-	-	Chr00	2595144	2595911	u	-
MSTRG.77.1	MSTRG.77	AUR62044421	AUR62044421-RA	Chr00	2752995	2753907	m	cysteine-rich RLK (RECEPTOR-like protein kinase) 25
AUR62044421-RA	MSTRG.77	AUR62044421	AUR62044421-RA	Chr00	2753038	2753907	=	cysteine-rich RLK (RECEPTOR-like protein kinase) 27
MSTRG.78.1	MSTRG.78	AUR62044422	AUR62044422-RA	Chr00	2755171	2755727	x	cysteine-rich RLK (RECEPTOR-like protein kinase) 27
AUR62044422-RA	MSTRG.79	AUR62044422	AUR62044422-RA	Chr00	2755529	2756135	=	-
MSTRG.80.1	MSTRG.80	-	-	Chr00	2784907	2785312	u	-
MSTRG.81.1	MSTRG.81	-	-	Chr00	2848381	2848657	u	-
AUR62044423-RA	MSTRG.82	AUR62044423	AUR62044423-RA	Chr00	2756750	2761070	=	Receptor-like protein kinase-related family protein
MSTRG.83.1	MSTRG.83	AUR62044423	AUR62044423-RA	Chr00	2758078	2759254	x	Receptor-like protein kinase-related family protein
MSTRG.84.1	MSTRG.84	-	-	Chr00	2861711	2862016	u	-
MSTRG.85.1	MSTRG.85	-	-	Chr00	2870253	2870480	u	-
MSTRG.86.1	MSTRG.86	-	-	Chr00	2957941	2958385	u	-
AUR62044194-RA	MSTRG.87	AUR62044194	AUR62044194-RA	Chr00	3104581	3110363	=	-
MSTRG.87.2	MSTRG.87	AUR62044194	AUR62044194-RA	Chr00	3108633	3110363	j	-
MSTRG.87.3	MSTRG.87	AUR62044194	AUR62044194-RA	Chr00	3108633	3110363	j	-
MSTRG.88.1	MSTRG.88	-	-	Chr00	3119396	3119721	u	-
MSTRG.89.1	MSTRG.89	-	-	Chr00	3121375	3121663	u	-
MSTRG.90.1	MSTRG.90	-	-	Chr00	3122161	3122673	u	-
MSTRG.91.1	MSTRG.91	AUR62044195	AUR62044195-RA	Chr00	3113395	3115940	j	-
AUR62044195-RA	MSTRG.91	AUR62044195	AUR62044195-RA	Chr00	3114747	3115940	=	-
MSTRG.92.1	MSTRG.92	-	-	Chr00	3141273	3141605	u	-
MSTRG.93.1	MSTRG.93	AUR62044196	AUR62044196-RA	Chr00	3137357	3138608	j	-
AUR62044196-RA	MSTRG.93	AUR62044196	AUR62044196-RA	Chr00	3137357	3138608	=	-
MSTRG.94.1	MSTRG.94	AUR62044196	AUR62044196-RA	Chr00	3137612	3138451	x	-
MSTRG.95.1	MSTRG.95	-	-	Chr00	3142050	3142446	u	-
MSTRG.96.1	MSTRG.96	-	-	Chr00	3170390	3170869	u	-
MSTRG.97.1	MSTRG.97	-	-	Chr00	3271893	3272519	u	-
MSTRG.98.1	MSTRG.98	-	-	Chr00	3275094	3275587	u	-
MSTRG.99.1	MSTRG.99	-	-	Chr00	3324090	3330459	u	-
MSTRG.100.1	MSTRG.100	-	-	Chr00	3324450	3330686	u	-
MSTRG.101.1	MSTRG.101	-	-	Chr00	3411327	3411773	u	adenosine kinase
MSTRG.102.1	MSTRG.102	-	-	Chr00	3412859	3413315	u	-
MSTRG.103.1	MSTRG.103	-	-	Chr00	3415144	3415480	u	-
MSTRG.104.1	MSTRG.104	-	-	Chr00	3479818	3480312	u	-
MSTRG.105.1	MSTRG.105	-	-	Chr00	3482813	3483114	u	-
MSTRG.106.1	MSTRG.106	-	-	Chr00	3495242	3495821	u	-
MSTRG.107.1	MSTRG.107	-	-	Chr00	3485498	3488566	u	5'-3' exonuclease family protein
MSTRG.108.1	MSTRG.108	-	-	Chr00	3641288	3641658	u	-
MSTRG.109.1	MSTRG.109	-	-	Chr00	3650922	3651590	u	-
MSTRG.110.1	MSTRG.110	-	-	Chr00	3664106	3664403	u	-
MSTRG.111.1	MSTRG.111	-	-	Chr00	3668888	3669120	u	-
MSTRG.112.1	MSTRG.112	-	-	Chr00	3828848	3829611	u	-
MSTRG.113.1	MSTRG.113	-	-	Chr00	3511088	3535419	u	-
MSTRG.113.2	MSTRG.113	-	-	Chr00	3511338	3522122	u	-
MSTRG.113.3	MSTRG.113	-	-	Chr00	3511719	3524422	u	-
MSTRG.113.4	MSTRG.113	-	-	Chr00	3511720	3525926	u	-
MSTRG.113.5	MSTRG.113	-	-	Chr00	3511720	3522122	u	-
MSTRG.113.6	MSTRG.113	-	-	Chr00	3512910	3533691	u	-
MSTRG.113.7	MSTRG.113	-	-	Chr00	3512953	3540375	u	-
MSTRG.113.8	MSTRG.113	-	-	Chr00	3515465	3534029	u	-
MSTRG.113.9	MSTRG.113	-	-	Chr00	3524685	3534029	u	-
MSTRG.113.10	MSTRG.113	-	-	Chr00	3529749	3540375	u	-
MSTRG.114.1	MSTRG.114	-	-	Chr00	3511717	3531093	u	-
MSTRG.114.2	MSTRG.114	-	-	Chr00	3511720	3532663	u	-
MSTRG.114.3	MSTRG.114	-	-	Chr00	3511720	3522595	u	-
MSTRG.114.4	MSTRG.114	-	-	Chr00	3519952	3531212	u	-
MSTRG.114.5	MSTRG.114	-	-	Chr00	3520737	3541257	u	-
MSTRG.115.1	MSTRG.115	-	-	Chr00	3514782	3533692	u	-
MSTRG.115.2	MSTRG.115	-	-	Chr00	3524170	3533692	u	-
MSTRG.115.3	MSTRG.115	-	-	Chr00	3524189	3533692	u	-
MSTRG.116.1	MSTRG.116	AUR62043775	AUR62043775-RA	Chr00	3917533	3922354	j	cAMP-regulated phosphoprotein 19-related protein
AUR62043775-RA	MSTRG.116	AUR62043775	AUR62043775-RA	Chr00	3917554	3921796	=	cAMP-regulated phosphoprotein 19-related protein
AUR62043776-RA	MSTRG.117	AUR62043776	AUR62043776-RA	Chr00	3925594	3932291	=	beta-xylosidase 1
MSTRG.118.1	MSTRG.118	-	-	Chr00	4133696	4134218	u	-
MSTRG.119.1	MSTRG.119	-	-	Chr00	4390112	4390836	u	-
AUR62043777-RA	MSTRG.120	AUR62043777	AUR62043777-RA	Chr00	3943563	3949337	=	acyl-activating enzyme 7
MSTRG.121.1	MSTRG.121	AUR62043777	AUR62043777-RA	Chr00	3949015	3949267	x	acyl-activating enzyme 7
MSTRG.122.1	MSTRG.122	-	-	Chr00	4445522	4445927	u	heat shock protein 70
MSTRG.123.1	MSTRG.123	-	-	Chr00	4446942	4448812	u	heat shock protein 70 (Hsp 70) family protein
MSTRG.124.1	MSTRG.124	-	-	Chr00	4460702	4461426	u	heat shock protein 70
MSTRG.125.1	MSTRG.125	-	-	Chr00	4462069	4464116	u	heat shock cognate protein 70-1
MSTRG.126.1	MSTRG.126	-	-	Chr00	4643379	4644105	u	-
MSTRG.127.1	MSTRG.127	-	-	Chr00	5189484	5189760	u	-
MSTRG.128.1	MSTRG.128	AUR62044328	AUR62044328-RA	Chr00	5176290	5178866	j	disease resistance protein (TIR-NBS-LRR class), putative
AUR62044328-RA	MSTRG.128	AUR62044328	AUR62044328-RA	Chr00	5177404	5178866	=	disease resistance protein (TIR-NBS-LRR class), putative
AUR62044325-RA	MSTRG.129	AUR62044325	AUR62044325-RA	Chr00	5145652	5148459	=	Peroxidase superfamily protein
MSTRG.130.1	MSTRG.130	AUR62044326	AUR62044326-RA	Chr00	5158392	5160837	j	disease resistance protein (TIR-NBS-LRR class), putative
AUR62044326-RA	MSTRG.130	AUR62044326	AUR62044326-RA	Chr00	5159286	5161706	=	disease resistance protein (TIR-NBS-LRR class)
AUR62044327-RA	MSTRG.131	AUR62044327	AUR62044327-RA	Chr00	5163744	5166548	=	Peroxidase superfamily protein
MSTRG.132.1	MSTRG.132	-	-	Chr00	5173187	5173676	u	-
MSTRG.133.1	MSTRG.133	-	-	Chr00	5362345	5362759	u	-
MSTRG.134.1	MSTRG.134	-	-	Chr00	5365949	5366742	u	-
MSTRG.135.1	MSTRG.135	-	-	Chr00	5367165	5367629	u	-
MSTRG.136.1	MSTRG.136	-	-	Chr00	5370468	5370849	u	-
MSTRG.137.1	MSTRG.137	-	-	Chr00	5378566	5378827	u	-
MSTRG.138.1	MSTRG.138	-	-	Chr00	5371972	5372730	u	-
MSTRG.139.1	MSTRG.139	-	-	Chr00	5379932	5380737	u	-
MSTRG.140.1	MSTRG.140	-	-	Chr00	5379954	5394697	u	-
MSTRG.141.1	MSTRG.141	-	-	Chr00	5385405	5400675	u	-
MSTRG.142.1	MSTRG.142	-	-	Chr00	5393847	5394956	u	-
MSTRG.143.1	MSTRG.143	AUR62044102	AUR62044102-RA	Chr00	5506527	5517056	k	Aldolase superfamily protein
MSTRG.143.2	MSTRG.143	AUR62044101	AUR62044101-RA	Chr00	5506527	5514115	j	calcium-dependent protein kinase 28
MSTRG.143.3	MSTRG.143	AUR62044101	AUR62044101-RA	Chr00	5506528	5514115	j	calcium-dependent protein kinase 28
AUR62044101-RA	MSTRG.143	AUR62044101	AUR62044101-RA	Chr00	5509928	5514015	=	calcium-dependent protein kinase 28
AUR62044102-RA	MSTRG.143	AUR62044102	AUR62044102-RA	Chr00	5514016	5517056	=	Aldolase superfamily protein
MSTRG.144.1	MSTRG.144	AUR62044103	AUR62044103-RA	Chr00	5523562	5531561	k	Protein kinase family protein
AUR62044103-RA	MSTRG.144	AUR62044103	AUR62044103-RA	Chr00	5523875	5531364	=	Protein kinase family protein
MSTRG.144.3	MSTRG.144	AUR62044103	AUR62044103-RA	Chr00	5525398	5527631	j	-
MSTRG.145.1	MSTRG.145	AUR62044103	AUR62044103-RA	Chr00	5529357	5531844	x	-
AUR62043986-RA	MSTRG.146	AUR62043986	AUR62043986-RA	Chr00	5582212	5595373	=	FUNCTIONS IN: molecular_function unknown; INVOLVED IN: response to cadmium ion; LOCATED IN: plasma membrane; EXPRESSED IN: 25 plant structures; EXPRESSED DURING: 13 growth stages; CONTAINS InterPro DOMAIN/s: Prefoldin (InterPro:IPR009053); BEST Arabidopsis thaliana protein match is: unknown protein (TAIR:AT1G05320.3); Has 470429 Blast hits to 168274 proteins in 4282 species: Archae - 6896; Bacter…
MSTRG.146.2	MSTRG.146	AUR62043986	AUR62043986-RA	Chr00	5584768	5591850	n	FUNCTIONS IN: molecular_function unknown; INVOLVED IN: response to cadmium ion; LOCATED IN: plasma membrane; EXPRESSED IN: 25 plant structures; EXPRESSED DURING: 13 growth stages; CONTAINS InterPro DOMAIN/s: Prefoldin (InterPro:IPR009053); BEST Arabidopsis thaliana protein match is: unknown protein (TAIR:AT1G05320.3); Has 470429 Blast hits to 168274 proteins in 4282 species: Archae - 6896; Bacter…
MSTRG.146.3	MSTRG.146	AUR62043986	AUR62043986-RA	Chr00	5587134	5591373	n	FUNCTIONS IN: molecular_function unknown; INVOLVED IN: response to cadmium ion; LOCATED IN: plasma membrane; EXPRESSED IN: 25 plant structures; EXPRESSED DURING: 13 growth stages; CONTAINS InterPro DOMAIN/s: Prefoldin (InterPro:IPR009053); BEST Arabidopsis thaliana protein match is: unknown protein (TAIR:AT1G05320.3); Has 470429 Blast hits to 168274 proteins in 4282 species: Archae - 6896; Bacter…
MSTRG.147.1	MSTRG.147	AUR62043986	AUR62043986-RA	Chr00	5592019	5593399	i	-
MSTRG.148.1	MSTRG.148	AUR62043986	AUR62043986-RA	Chr00	5593778	5594156	i	-
MSTRG.149.1	MSTRG.149	-	-	Chr00	5952854	5953701	u	Proteasome component (PCI) domain protein
MSTRG.150.1	MSTRG.150	-	-	Chr00	5979449	5979898	u	-
MSTRG.151.1	MSTRG.151	-	-	Chr00	6006080	6006312	u	-
MSTRG.152.1	MSTRG.152	AUR62043987	AUR62043987-RA	Chr00	5606437	5611081	k	FUNCTIONS IN: molecular_function unknown; INVOLVED IN: response to cadmium ion; LOCATED IN: plasma membrane; EXPRESSED IN: 25 plant structures; EXPRESSED DURING: 13 growth stages; CONTAINS InterPro DOMAIN/s: Prefoldin (InterPro:IPR009053); BEST Arabidopsis thaliana protein match is: unknown protein (TAIR:AT1G05320.3); Has 470429 Blast hits to 168274 proteins in 4282 species: Archae - 6896; Bacter…
AUR62043987-RA	MSTRG.152	AUR62043987	AUR62043987-RA	Chr00	5606437	5610001	=	FUNCTIONS IN: molecular_function unknown; INVOLVED IN: response to cadmium ion; LOCATED IN: plasma membrane; EXPRESSED IN: 25 plant structures; EXPRESSED DURING: 13 growth stages; CONTAINS InterPro DOMAIN/s: Prefoldin (InterPro:IPR009053); BEST Arabidopsis thaliana protein match is: unknown protein (TAIR:AT1G05320.3); Has 470429 Blast hits to 168274 proteins in 4282 species: Archae - 6896; Bacter…
MSTRG.152.3	MSTRG.152	AUR62043987	AUR62043987-RA	Chr00	5606647	5608085	j	FUNCTIONS IN: molecular_function unknown; INVOLVED IN: response to cadmium ion; LOCATED IN: plasma membrane; EXPRESSED IN: 25 plant structures; EXPRESSED DURING: 13 growth stages; CONTAINS InterPro DOMAIN/s: Prefoldin (InterPro:IPR009053); BEST Arabidopsis thaliana protein match is: unknown protein (TAIR:AT1G05320.3); Has 470429 Blast hits to 168274 proteins in 4282 species: Archae - 6896; Bacter…
MSTRG.152.4	MSTRG.152	AUR62043987	AUR62043987-RA	Chr00	5608186	5611081	n	FUNCTIONS IN: molecular_function unknown; INVOLVED IN: response to cadmium ion; LOCATED IN: plasma membrane; EXPRESSED IN: 25 plant structures; EXPRESSED DURING: 13 growth stages; CONTAINS InterPro DOMAIN/s: Prefoldin (InterPro:IPR009053); BEST Arabidopsis thaliana protein match is: unknown protein (TAIR:AT1G05320.3); Has 470429 Blast hits to 168274 proteins in 4282 species: Archae - 6896; Bacter…
MSTRG.153.1	MSTRG.153	AUR62043987	AUR62043987-RA	Chr00	5606644	5606980	x	FUNCTIONS IN: molecular_function unknown; INVOLVED IN: response to cadmium ion; LOCATED IN: plasma membrane; EXPRESSED IN: 25 plant structures; EXPRESSED DURING: 13 growth stages; CONTAINS InterPro DOMAIN/s: Prefoldin (InterPro:IPR009053); BEST Arabidopsis thaliana protein match is: unknown protein (TAIR:AT1G05320.3); Has 470429 Blast hits to 168274 proteins in 4282 species: Archae - 6896; Bacter…
MSTRG.154.1	MSTRG.154	-	-	Chr00	6080769	6081111	u	-
MSTRG.155.1	MSTRG.155	-	-	Chr00	6111029	6111324	u	-
MSTRG.156.1	MSTRG.156	-	-	Chr00	6118953	6119381	u	-
MSTRG.157.1	MSTRG.157	-	-	Chr00	6471273	6471632	u	-
MSTRG.158.1	MSTRG.158	-	-	Chr00	6472113	6472509	u	-
MSTRG.159.1	MSTRG.159	-	-	Chr00	6486082	6486451	u	-
MSTRG.160.1	MSTRG.160	-	-	Chr00	6489495	6489873	u	-
MSTRG.161.1	MSTRG.161	-	-	Chr00	6561779	6562137	u	-
MSTRG.162.1	MSTRG.162	-	-	Chr00	6567288	6567646	u	-
MSTRG.163.1	MSTRG.163	-	-	Chr00	6576939	6577308	u	-
MSTRG.164.1	MSTRG.164	-	-	Chr00	6674543	6674836	u	-
MSTRG.165.1	MSTRG.165	-	-	Chr00	6678791	6679028	u	-
MSTRG.166.1	MSTRG.166	-	-	Chr00	6679413	6679614	u	-
MSTRG.167.1	MSTRG.167	-	-	Chr00	6745021	6745573	u	-
MSTRG.168.1	MSTRG.168	AUR62044119	AUR62044119-RA	Chr00	6327979	6347148	k	Transmembrane amino acid transporter family protein
AUR62044119-RA	MSTRG.168	AUR62044119	AUR62044119-RA	Chr00	6327979	6332568	=	Transmembrane amino acid transporter family protein
MSTRG.168.3	MSTRG.168	AUR62044119	AUR62044119-RA	Chr00	6330175	6331804	j	Transmembrane amino acid transporter family protein
MSTRG.168.4	MSTRG.168	AUR62044120	AUR62044120-RA	Chr00	6342288	6347148	j	Transmembrane amino acid transporter family protein
AUR62044120-RA	MSTRG.168	AUR62044120	AUR62044120-RA	Chr00	6342354	6346921	=	Transmembrane amino acid transporter family protein
MSTRG.169.1	MSTRG.169	-	-	Chr00	6798665	6799310	u	-
MSTRG.170.1	MSTRG.170	-	-	Chr00	6820101	6820416	u	-
MSTRG.171.1	MSTRG.171	-	-	Chr00	6829005	6829547	u	-
AUR62043471-RA	MSTRG.172	AUR62043471	AUR62043471-RA	Chr00	6823119	6826797	=	-
MSTRG.173.1	MSTRG.173	AUR62043471	AUR62043471-RA	Chr00	6826507	6826912	x	-
MSTRG.174.1	MSTRG.174	-	-	Chr00	6831071	6831459	u	-
MSTRG.175.1	MSTRG.175	-	-	Chr00	6838462	6838690	u	-
MSTRG.176.1	MSTRG.176	-	-	Chr00	6882643	6883189	u	-
MSTRG.177.1	MSTRG.177	-	-	Chr00	6890783	6891158	u	-
MSTRG.178.1	MSTRG.178	-	-	Chr00	7003240	7003580	u	-
MSTRG.179.1	MSTRG.179	-	-	Chr00	7007239	7007823	u	-
MSTRG.180.1	MSTRG.180	-	-	Chr00	7008139	7008484	u	-
MSTRG.181.1	MSTRG.181	-	-	Chr00	7240669	7242553	u	-
MSTRG.182.1	MSTRG.182	-	-	Chr00	7242855	7243744	u	-
MSTRG.183.1	MSTRG.183	AUR62043475	AUR62043475-RA	Chr00	6867005	6882440	j	cellulose synthase like E1
AUR62043474-RA	MSTRG.183	AUR62043474	AUR62043474-RA	Chr00	6867037	6868349	=	cellulose synthase like E1
AUR62043475-RA	MSTRG.183	AUR62043475	AUR62043475-RA	Chr00	6870618	6880369	=	cellulose synthase like E1
MSTRG.184.1	MSTRG.184	AUR62043474	AUR62043474-RA	Chr00	6867024	6867487	x	cellulose synthase like E1
MSTRG.185.1	MSTRG.185	-	-	Chr00	6868450	6868765	u	-
MSTRG.186.1	MSTRG.186	-	-	Chr00	7258723	7259801	u	-
MSTRG.187.1	MSTRG.187	-	-	Chr00	7244249	7257671	u	-
MSTRG.188.1	MSTRG.188	-	-	Chr00	7245368	7245693	u	-
MSTRG.189.1	MSTRG.189	-	-	Chr00	7245975	7247128	u	-
MSTRG.190.1	MSTRG.190	-	-	Chr00	7247715	7248048	u	-
MSTRG.191.1	MSTRG.191	-	-	Chr00	7248556	7249885	u	-
MSTRG.192.1	MSTRG.192	-	-	Chr00	7252453	7254201	u	-
MSTRG.193.1	MSTRG.193	-	-	Chr00	7255657	7255956	u	-
MSTRG.194.1	MSTRG.194	-	-	Chr00	7278359	7278713	u	-
MSTRG.195.1	MSTRG.195	-	-	Chr00	7292643	7292936	u	-
AUR62044378-RA	MSTRG.196	AUR62044378	AUR62044378-RA	Chr00	7307276	7307849	=	ribulose-bisphosphate carboxylases
MSTRG.197.1	MSTRG.197	-	-	Chr00	7312290	7312615	u	-
MSTRG.198.1	MSTRG.198	-	-	Chr00	7314632	7314893	u	-
MSTRG.199.1	MSTRG.199	-	-	Chr00	7319112	7319942	u	-
MSTRG.200.1	MSTRG.200	-	-	Chr00	7322973	7323302	u	-
MSTRG.201.1	MSTRG.201	-	-	Chr00	7331650	7331864	u	-
MSTRG.202.1	MSTRG.202	-	-	Chr00	7333973	7334472	u	-
MSTRG.203.1	MSTRG.203	AUR62044377	AUR62044377-RA	Chr00	7260008	7266102	j	Protein of unknown function (DUF707)
AUR62044377-RA	MSTRG.203	AUR62044377	AUR62044377-RA	Chr00	7260576	7266102	=	Protein of unknown function (DUF707)
MSTRG.203.3	MSTRG.203	AUR62044377	AUR62044377-RA	Chr00	7260623	7262349	n	Protein of unknown function (DUF707)
MSTRG.203.4	MSTRG.203	AUR62044377	AUR62044377-RA	Chr00	7264003	7266102	j	-
MSTRG.203.5	MSTRG.203	AUR62044377	AUR62044377-RA	Chr00	7264183	7266102	o	-
MSTRG.204.1	MSTRG.204	AUR62044377	AUR62044377-RA	Chr00	7263608	7267180	x	-
MSTRG.205.1	MSTRG.205	-	-	Chr00	7339103	7340094	u	-
MSTRG.206.1	MSTRG.206	-	-	Chr00	7338122	7338733	u	-
MSTRG.207.1	MSTRG.207	-	-	Chr00	7335890	7337428	u	-
MSTRG.208.1	MSTRG.208	-	-	Chr00	7346765	7347136	u	-
MSTRG.209.1	MSTRG.209	-	-	Chr00	7348057	7348423	u	-
MSTRG.210.1	MSTRG.210	-	-	Chr00	7352539	7352751	u	-
MSTRG.211.1	MSTRG.211	-	-	Chr00	7357432	7357749	u	-
MSTRG.212.1	MSTRG.212	-	-	Chr00	7359538	7360159	u	-
MSTRG.213.1	MSTRG.213	-	-	Chr00	7363987	7364404	u	-
MSTRG.214.1	MSTRG.214	-	-	Chr00	7380319	7380669	u	-
MSTRG.215.1	MSTRG.215	-	-	Chr00	7381986	7382642	u	-
MSTRG.216.1	MSTRG.216	-	-	Chr00	7391964	7392487	u	-
MSTRG.217.1	MSTRG.217	-	-	Chr00	7393795	7394342	u	-
MSTRG.218.1	MSTRG.218	-	-	Chr00	7477642	7478147	u	-
AUR62043745-RA	MSTRG.219	AUR62043745	AUR62043745-RA	Chr00	7609276	7615551	=	magnesium transporter 9
AUR62043746-RA	MSTRG.220	AUR62043746	AUR62043746-RA	Chr00	7617036	7620671	=	Protein-tyrosine phosphatase-like, PTPLA
MSTRG.220.2	MSTRG.220	AUR62043746	AUR62043746-RA	Chr00	7619286	7620671	n	Protein-tyrosine phosphatase-like, PTPLA
MSTRG.221.1	MSTRG.221	-	-	Chr00	7639401	7639666	u	-
MSTRG.222.1	MSTRG.222	-	-	Chr00	7907970	7908271	u	-
MSTRG.223.1	MSTRG.223	AUR62043747	AUR62043747-RA	Chr00	7623166	7628223	j	K-box region and MADS-box transcription factor family protein
AUR62043747-RA	MSTRG.223	AUR62043747	AUR62043747-RA	Chr00	7623770	7628223	=	K-box region and MADS-box transcription factor family protein
MSTRG.224.1	MSTRG.224	-	-	Chr00	8333957	8334530	u	-
MSTRG.225.1	MSTRG.225	-	-	Chr00	8336692	8337203	u	-
AUR62044062-RA	MSTRG.226	AUR62044062	AUR62044062-RA	Chr00	7912325	7924340	=	-
MSTRG.227.1	MSTRG.227	AUR62044062	AUR62044062-RA	Chr00	7912764	7913790	i	-
MSTRG.228.1	MSTRG.228	-	-	Chr00	8339299	8345270	u	-
MSTRG.229.1	MSTRG.229	-	-	Chr00	8405472	8405703	u	-
MSTRG.230.1	MSTRG.230	-	-	Chr00	8487476	8488164	u	-
MSTRG.231.1	MSTRG.231	-	-	Chr00	8505630	8505911	u	-
MSTRG.232.1	MSTRG.232	-	-	Chr00	8546405	8546818	u	-
MSTRG.233.1	MSTRG.233	-	-	Chr00	8558295	8558583	u	-
MSTRG.234.1	MSTRG.234	-	-	Chr00	8561977	8562230	u	-
MSTRG.235.1	MSTRG.235	-	-	Chr00	8660257	8660539	u	-
MSTRG.236.1	MSTRG.236	-	-	Chr00	8671759	8672116	u	-
MSTRG.237.1	MSTRG.237	-	-	Chr00	8777060	8777281	u	-
MSTRG.238.1	MSTRG.238	-	-	Chr00	8785731	8786266	u	-
MSTRG.239.1	MSTRG.239	-	-	Chr00	8813396	8813623	u	-
MSTRG.240.1	MSTRG.240	-	-	Chr00	8892569	8892933	u	-
MSTRG.241.1	MSTRG.241	-	-	Chr00	8819748	8820590	u	MLP-like protein 43
MSTRG.242.1	MSTRG.242	-	-	Chr00	8895802	8896408	u	-
MSTRG.243.1	MSTRG.243	-	-	Chr00	8929333	8929622	u	-
MSTRG.244.1	MSTRG.244	-	-	Chr00	8931134	8931589	u	-
MSTRG.245.1	MSTRG.245	-	-	Chr00	8941113	8941382	u	-
MSTRG.246.1	MSTRG.246	-	-	Chr00	8947554	8947879	u	-
MSTRG.247.1	MSTRG.247	-	-	Chr00	8967604	8968044	u	-
MSTRG.248.1	MSTRG.248	-	-	Chr00	9004049	9004382	u	-
AUR62044091-RA	MSTRG.249	AUR62044091	AUR62044091-RA	Chr00	8949424	8961740	=	-
MSTRG.250.1	MSTRG.250	AUR62044091	AUR62044091-RA	Chr00	8949867	8950728	i	BED zinc finger ;hAT family dimerisation domain
MSTRG.251.1	MSTRG.251	AUR62044091	AUR62044091-RA	Chr00	8957110	8957439	i	-
MSTRG.252.1	MSTRG.252	-	-	Chr00	9008587	9008942	u	-
AUR62044092-RA	MSTRG.253	AUR62044092	AUR62044092-RA	Chr00	8969959	8973799	=	Thioesterase superfamily protein
MSTRG.254.1	MSTRG.254	AUR62044092	AUR62044092-RA	Chr00	8973609	8974233	x	-
MSTRG.255.1	MSTRG.255	-	-	Chr00	9013068	9013326	u	-
MSTRG.256.1	MSTRG.256	-	-	Chr00	9017339	9017638	u	-
MSTRG.257.1	MSTRG.257	-	-	Chr00	9077461	9077718	u	-
MSTRG.258.1	MSTRG.258	-	-	Chr00	9079855	9082320	u	-
MSTRG.259.1	MSTRG.259	-	-	Chr00	9253481	9253686	u	-
MSTRG.260.1	MSTRG.260	-	-	Chr00	9195786	9202105	u	-
MSTRG.261.1	MSTRG.261	-	-	Chr00	9198929	9199375	u	-
MSTRG.262.1	MSTRG.262	-	-	Chr00	9264782	9265102	u	-
MSTRG.263.1	MSTRG.263	-	-	Chr00	9271179	9271706	u	-
AUR62043942-RA	MSTRG.264	AUR62043942	AUR62043942-RA	Chr00	9092674	9110744	=	Protein kinase superfamily protein
MSTRG.264.2	MSTRG.264	AUR62043942	AUR62043942-RA	Chr00	9108179	9108615	i	-
MSTRG.265.1	MSTRG.265	-	-	Chr00	9411419	9411789	u	-
MSTRG.266.1	MSTRG.266	AUR62043833	AUR62043833-RA	Chr00	9416013	9416383	p	-
MSTRG.267.1	MSTRG.267	-	-	Chr00	9416951	9417286	u	-
AUR62043832-RA	MSTRG.268	AUR62043832	AUR62043832-RA	Chr00	9408073	9410041	=	Tetratricopeptide repeat (TPR)-like superfamily protein
MSTRG.269.1	MSTRG.269	-	-	Chr00	9423856	9424129	u	-
MSTRG.270.1	MSTRG.270	-	-	Chr00	9424435	9424972	u	-
MSTRG.271.1	MSTRG.271	AUR62043834	AUR62043834-RA	Chr00	9431369	9431575	p	-
MSTRG.272.1	MSTRG.272	AUR62043833	AUR62043833-RA	Chr00	9417536	9417977	x	unknown protein; FUNCTIONS IN: molecular_function unknown; INVOLVED IN: biological_process unknown; LOCATED IN: cellular_component unknown; EXPRESSED IN: 24 plant structures; EXPRESSED DURING: 15 growth stages; Has 30201 Blast hits to 17322 proteins in 780 species: Archae - 12; Bacteria - 1396; Metazoa - 17338; Fungi - 3422; Plants - 5037; Viruses - 0; Other Eukaryotes - 2996 (source: NCBI BLink).
MSTRG.273.1	MSTRG.273	AUR62043833	AUR62043833-RA	Chr00	9417581	9418152	j	unknown protein; FUNCTIONS IN: molecular_function unknown; INVOLVED IN: biological_process unknown; LOCATED IN: cellular_component unknown; EXPRESSED IN: 24 plant structures; EXPRESSED DURING: 15 growth stages; Has 30201 Blast hits to 17322 proteins in 780 species: Archae - 12; Bacteria - 1396; Metazoa - 17338; Fungi - 3422; Plants - 5037; Viruses - 0; Other Eukaryotes - 2996 (source: NCBI BLink).
AUR62043833-RA	MSTRG.273	AUR62043833	AUR62043833-RA	Chr00	9417844	9419789	=	unknown protein; FUNCTIONS IN: molecular_function unknown; INVOLVED IN: biological_process unknown; LOCATED IN: cellular_component unknown; EXPRESSED IN: 24 plant structures; EXPRESSED DURING: 15 growth stages; Has 30201 Blast hits to 17322 proteins in 780 species: Archae - 12; Bacteria - 1396; Metazoa - 17338; Fungi - 3422; Plants - 5037; Viruses - 0; Other Eukaryotes - 2996 (source: NCBI BLink).
MSTRG.273.3	MSTRG.273	AUR62043833	AUR62043833-RA	Chr00	9418276	9419789	j	unknown protein; FUNCTIONS IN: molecular_function unknown; INVOLVED IN: biological_process unknown; LOCATED IN: cellular_component unknown; EXPRESSED IN: 24 plant structures; EXPRESSED DURING: 15 growth stages; Has 30201 Blast hits to 17322 proteins in 780 species: Archae - 12; Bacteria - 1396; Metazoa - 17338; Fungi - 3422; Plants - 5037; Viruses - 0; Other Eukaryotes - 2996 (source: NCBI BLink).
MSTRG.274.1	MSTRG.274	AUR62043833	AUR62043833-RA	Chr00	9419646	9420555	x	-
MSTRG.275.1	MSTRG.275	-	-	Chr00	9436547	9437277	u	-
MSTRG.276.1	MSTRG.276	-	-	Chr00	9445510	9446026	u	-
AUR62043834-RA	MSTRG.277	AUR62043834	AUR62043834-RA	Chr00	9432160	9435409	=	20S proteasome alpha subunit PAD1
MSTRG.278.1	MSTRG.278	-	-	Chr00	9938794	9939091	u	-
MSTRG.279.1	MSTRG.279	-	-	Chr00	9959586	9959958	u	-
MSTRG.280.1	MSTRG.280	-	-	Chr00	9962679	9963235	u	-
MSTRG.281.1	MSTRG.281	-	-	Chr00	9968879	9969454	u	-
MSTRG.282.1	MSTRG.282	-	-	Chr00	9969960	9970216	u	-
AUR62043835-RA	MSTRG.283	AUR62043835	AUR62043835-RA	Chr00	9446646	9450889	=	histidine kinase 1
MSTRG.283.2	MSTRG.283	AUR62043835	AUR62043835-RA	Chr00	9447066	9449204	m	histidine kinase 1
MSTRG.284.1	MSTRG.284	-	-	Chr00	10175245	10175968	u	-
MSTRG.285.1	MSTRG.285	-	-	Chr00	10183131	10184130	u	-
AUR62044411-RA	MSTRG.286	AUR62044411	AUR62044411-RA	Chr00	10184632	10187219	=	calmodulin 7
MSTRG.287.1	MSTRG.287	-	-	Chr00	10340046	10340298	u	-
MSTRG.288.1	MSTRG.288	-	-	Chr00	10350532	10352917	u	Transducin/WD40 repeat-like superfamily protein
MSTRG.289.1	MSTRG.289	AUR62044412	AUR62044412-RA	Chr00	10188155	10188791	x	ubiquitin-conjugating enzyme 22
AUR62044412-RA	MSTRG.290	AUR62044412	AUR62044412-RA	Chr00	10188168	10193724	=	ubiquitin-conjugating enzyme 22
MSTRG.290.2	MSTRG.290	AUR62044412	AUR62044412-RA	Chr00	10188173	10193724	j	ubiquitin-conjugating enzyme 22
MSTRG.290.3	MSTRG.290	AUR62044412	AUR62044412-RA	Chr00	10188175	10193724	j	ubiquitin-conjugating enzyme 22
MSTRG.291.1	MSTRG.291	AUR62044458	AUR62044458-RA	Chr00	10370980	10372845	x	chlorsulfuron/imidazolinone resistant 1
AUR62044458-RA	MSTRG.292	AUR62044458	AUR62044458-RA	Chr00	10371098	10373077	=	chlorsulfuron/imidazolinone resistant 1
MSTRG.293.1	MSTRG.293	-	-	Chr00	10378440	10378957	u	-
MSTRG.294.1	MSTRG.294	-	-	Chr00	10527732	10528421	u	-
MSTRG.295.1	MSTRG.295	-	-	Chr00	10536544	10536746	u	-
MSTRG.296.1	MSTRG.296	-	-	Chr00	10537853	10538362	u	-
AUR62044283-RA	MSTRG.297	AUR62044283	AUR62044283-RA	Chr00	10513497	10525568	=	-
MSTRG.297.2	MSTRG.297	AUR62044283	AUR62044283-RA	Chr00	10518262	10518819	n	-
MSTRG.298.1	MSTRG.298	AUR62044283	AUR62044283-RA	Chr00	10513621	10514667	i	-
MSTRG.299.1	MSTRG.299	AUR62044283	AUR62044283-RA	Chr00	10524370	10524602	i	-
MSTRG.300.1	MSTRG.300	-	-	Chr00	10679031	10679369	u	-
MSTRG.301.1	MSTRG.301	-	-	Chr00	10675684	10675936	u	-
MSTRG.302.1	MSTRG.302	-	-	Chr00	10680068	10680413	u	-
MSTRG.303.1	MSTRG.303	-	-	Chr00	10681930	10682307	u	-
MSTRG.304.1	MSTRG.304	-	-	Chr00	10682667	10683924	u	-
MSTRG.305.1	MSTRG.305	-	-	Chr00	10696308	10696643	u	-
MSTRG.306.1	MSTRG.306	-	-	Chr00	10711151	10711437	u	-
MSTRG.307.1	MSTRG.307	-	-	Chr00	10699105	10700093	u	-
MSTRG.308.1	MSTRG.308	AUR62044757	AUR62044757-RA	Chr00	10701560	10706597	x	-
AUR62044757-RA	MSTRG.309	AUR62044757	AUR62044757-RA	Chr00	10705077	10705532	=	hAT transposon superfamily protein
MSTRG.310.1	MSTRG.310	-	-	Chr00	10748536	10754762	u	-
MSTRG.311.1	MSTRG.311	-	-	Chr00	10874920	10875292	u	-
MSTRG.312.1	MSTRG.312	-	-	Chr00	10878068	10878859	u	-
MSTRG.313.1	MSTRG.313	AUR62043195	AUR62043195-RA	Chr00	10888438	10890504	j	-
AUR62043195-RA	MSTRG.313	AUR62043195	AUR62043195-RA	Chr00	10888506	10891773	=	cytochrome P450, family 98, subfamily A, polypeptide 3
MSTRG.314.1	MSTRG.314	-	-	Chr00	10925165	10925676	u	-
MSTRG.315.1	MSTRG.315	AUR62043197	AUR62043197-RA	Chr00	10927552	10927902	p	-
AUR62043196-RA	MSTRG.316	AUR62043196	AUR62043196-RA	Chr00	10898485	10904320	=	P-loop containing nucleoside triphosphate hydrolases superfamily protein
MSTRG.316.2	MSTRG.316	AUR62043196	AUR62043196-RA	Chr00	10903346	10907663	j	proton pump interactor 2
MSTRG.317.1	MSTRG.317	AUR62043196	AUR62043196-RA	Chr00	10903595	10903847	i	-
MSTRG.318.1	MSTRG.318	AUR62043192	AUR62043192-RA	Chr00	10843321	10844109	x	calmodulin 2
MSTRG.319.1	MSTRG.319	AUR62043192	AUR62043192-RA	Chr00	10843323	10846067	j	calmodulin 7
AUR62043192-RA	MSTRG.319	AUR62043192	AUR62043192-RA	Chr00	10843419	10845087	=	calmodulin 7
MSTRG.319.3	MSTRG.319	AUR62043193	AUR62043193-RA	Chr00	10843644	10866417	j	calmodulin 7
MSTRG.319.4	MSTRG.319	AUR62043193	AUR62043193-RA	Chr00	10862707	10871797	k	plus-3 domain-containing protein
AUR62043193-RA	MSTRG.319	AUR62043193	AUR62043193-RA	Chr00	10862707	10869880	=	plus-3 domain-containing protein
MSTRG.319.6	MSTRG.319	AUR62043193	AUR62043193-RA	Chr00	10862721	10871797	j	plus-3 domain-containing protein
MSTRG.319.7	MSTRG.319	AUR62043193	AUR62043193-RA	Chr00	10862764	10871797	j	plus-3 domain-containing protein
MSTRG.319.8	MSTRG.319	AUR62043193	AUR62043193-RA	Chr00	10867675	10871797	o	plus-3 domain-containing protein
MSTRG.320.1	MSTRG.320	AUR62043192	AUR62043192-RA	Chr00	10844464	10844832	i	-
MSTRG.321.1	MSTRG.321	-	-	Chr00	10845859	10846067	u	-
MSTRG.322.1	MSTRG.322	AUR62043193	AUR62043193-RA	Chr00	10862785	10863089	x	-
MSTRG.323.1	MSTRG.323	AUR62043193	AUR62043193-RA	Chr00	10863900	10864145	i	-
AUR62043198-RA	MSTRG.324	AUR62043198	AUR62043198-RA	Chr00	10932473	10934503	=	metacaspase 9
MSTRG.325.1	MSTRG.325	AUR62043198	AUR62043198-RA	Chr00	10932568	10932914	x	metacaspase 9
AUR62043201-RA	MSTRG.326	AUR62043201	AUR62043201-RA	Chr00	10951658	10952966	=	metacaspase 9
MSTRG.327.1	MSTRG.327	AUR62043201	AUR62043201-RA	Chr00	10951774	10951991	x	metacaspase 9
MSTRG.328.1	MSTRG.328	AUR62043201	AUR62043201-RA	Chr00	10952375	10952841	x	metacaspase 9
MSTRG.329.1	MSTRG.329	-	-	Chr00	10958061	10958398	u	-
AUR62043202-RA	MSTRG.330	AUR62043202	AUR62043202-RA	Chr00	10956015	10957136	=	P-loop containing nucleoside triphosphate hydrolases superfamily protein
MSTRG.331.1	MSTRG.331	-	-	Chr00	10935669	10936115	u	-
MSTRG.332.1	MSTRG.332	AUR62043199	AUR62043199-RA	Chr00	10936070	10939895	o	Tetratricopeptide repeat (TPR)-like superfamily protein
AUR62043199-RA	MSTRG.332	AUR62043199	AUR62043199-RA	Chr00	10938167	10941315	=	Tetratricopeptide repeat (TPR)-like superfamily protein
MSTRG.332.3	MSTRG.332	AUR62043199	AUR62043199-RA	Chr00	10940733	10941315	o	metacaspase 9
MSTRG.333.1	MSTRG.333	AUR62043199	AUR62043199-RA	Chr00	10938421	10939556	x	Tetratricopeptide repeat (TPR)-like superfamily protein
AUR62043200-RA	MSTRG.334	AUR62043200	AUR62043200-RA	Chr00	10941286	10946163	=	Duplicated homeodomain-like superfamily protein
MSTRG.335.1	MSTRG.335	-	-	Chr00	10959906	10960130	u	-
MSTRG.336.1	MSTRG.336	-	-	Chr00	10960157	10960416	u	-
MSTRG.337.1	MSTRG.337	AUR62043203	AUR62043203-RA	Chr00	10961308	10963264	x	P-loop containing nucleoside triphosphate hydrolases superfamily protein
AUR62043203-RA	MSTRG.338	AUR62043203	AUR62043203-RA	Chr00	10961313	10962350	=	P-loop containing nucleoside triphosphate hydrolases superfamily protein
MSTRG.339.1	MSTRG.339	AUR62043203	AUR62043203-RA	Chr00	10963573	10963838	p	-
MSTRG.340.1	MSTRG.340	-	-	Chr00	10964616	10964900	u	-
MSTRG.341.1	MSTRG.341	-	-	Chr00	10966402	10966672	u	-
AUR62043204-RA	MSTRG.342	AUR62043204	AUR62043204-RA	Chr00	10966837	10971222	=	unknown protein; Has 34 Blast hits to 34 proteins in 13 species: Archae - 0; Bacteria - 0; Metazoa - 0; Fungi - 0; Plants - 27; Viruses - 0; Other Eukaryotes - 7 (source: NCBI BLink).
MSTRG.342.2	MSTRG.342	AUR62043204	AUR62043204-RA	Chr00	10966899	10971222	m	unknown protein; Has 34 Blast hits to 34 proteins in 13 species: Archae - 0; Bacteria - 0; Metazoa - 0; Fungi - 0; Plants - 27; Viruses - 0; Other Eukaryotes - 7 (source: NCBI BLink).
MSTRG.343.1	MSTRG.343	AUR62043204	AUR62043204-RA	Chr00	10966903	10967287	x	unknown protein; Has 34 Blast hits to 34 proteins in 13 species: Archae - 0; Bacteria - 0; Metazoa - 0; Fungi - 0; Plants - 27; Viruses - 0; Other Eukaryotes - 7 (source: NCBI BLink).
MSTRG.344.1	MSTRG.344	AUR62044762	AUR62044762-RA	Chr00	11103221	11106646	x	ATP binding;leucine-tRNA ligases;aminoacyl-tRNA ligases;nucleotide binding;ATP binding;aminoacyl-tRNA ligases
MSTRG.345.1	MSTRG.345	AUR62044762	AUR62044762-RA	Chr00	11103254	11106646	o	ATP binding;leucine-tRNA ligases;aminoacyl-tRNA ligases;nucleotide binding;ATP binding;aminoacyl-tRNA ligases
AUR62044762-RA	MSTRG.345	AUR62044762	AUR62044762-RA	Chr00	11103392	11106646	=	ATP binding;leucine-tRNA ligases;aminoacyl-tRNA ligases;nucleotide binding;ATP binding;aminoacyl-tRNA ligases
MSTRG.346.1	MSTRG.346	-	-	Chr00	11239740	11240532	u	-
MSTRG.347.1	MSTRG.347	-	-	Chr00	11316626	11316976	u	-
MSTRG.348.1	MSTRG.348	-	-	Chr00	11317851	11318306	u	-
MSTRG.349.1	MSTRG.349	-	-	Chr00	11127615	11138267	u	ATP-dependent RNA helicase, mitochondrial (SUV3)
MSTRG.350.1	MSTRG.350	-	-	Chr00	11321839	11322602	u	-
MSTRG.351.1	MSTRG.351	-	-	Chr00	11322047	11322611	u	-
MSTRG.352.1	MSTRG.352	-	-	Chr00	11325360	11325697	u	-
MSTRG.353.1	MSTRG.353	-	-	Chr00	11527593	11528347	u	-
MSTRG.354.1	MSTRG.354	-	-	Chr00	11565140	11565507	u	-
MSTRG.355.1	MSTRG.355	-	-	Chr00	11565776	11566050	u	-
MSTRG.356.1	MSTRG.356	-	-	Chr00	11569131	11569366	u	-
MSTRG.357.1	MSTRG.357	-	-	Chr00	11573922	11574200	u	-
MSTRG.358.1	MSTRG.358	-	-	Chr00	11584328	11584727	u	-
MSTRG.359.1	MSTRG.359	-	-	Chr00	11585705	11586298	u	-
MSTRG.360.1	MSTRG.360	-	-	Chr00	11587506	11587843	u	-
MSTRG.361.1	MSTRG.361	-	-	Chr00	11588037	11588407	u	-
MSTRG.362.1	MSTRG.362	AUR62043718	AUR62043718-RA	Chr00	11603039	11603489	p	-
MSTRG.363.1	MSTRG.363	-	-	Chr00	11607138	11607459	u	-
MSTRG.364.1	MSTRG.364	-	-	Chr00	11625645	11625963	u	-
AUR62043718-RA	MSTRG.365	AUR62043718	AUR62043718-RA	Chr00	11603551	11603929	=	-
MSTRG.366.1	MSTRG.366	AUR62043718	AUR62043718-RA	Chr00	11603908	11604279	x	-
MSTRG.367.1	MSTRG.367	-	-	Chr00	11633607	11633913	u	-
MSTRG.368.1	MSTRG.368	-	-	Chr00	11634206	11634411	u	-
MSTRG.369.1	MSTRG.369	-	-	Chr00	11634655	11635011	u	-
MSTRG.370.1	MSTRG.370	-	-	Chr00	11638281	11638619	u	-
MSTRG.371.1	MSTRG.371	-	-	Chr00	11656006	11656989	u	-
MSTRG.372.1	MSTRG.372	-	-	Chr00	11683938	11684290	u	-
MSTRG.373.1	MSTRG.373	-	-	Chr00	11711930	11712579	u	-
MSTRG.374.1	MSTRG.374	-	-	Chr00	11713067	11713804	u	-
MSTRG.375.1	MSTRG.375	-	-	Chr00	11723466	11723748	u	-
MSTRG.376.1	MSTRG.376	-	-	Chr00	11724234	11724534	u	-
MSTRG.377.1	MSTRG.377	-	-	Chr00	11734801	11735526	u	-
MSTRG.378.1	MSTRG.378	-	-	Chr00	11738784	11739729	u	-
MSTRG.379.1	MSTRG.379	AUR62043717	AUR62043717-RA	Chr00	11574758	11581966	n	Protein of unknown function, DUF547
MSTRG.379.2	MSTRG.379	AUR62043717	AUR62043717-RA	Chr00	11574758	11581966	j	Protein of unknown function, DUF547
MSTRG.379.3	MSTRG.379	AUR62043717	AUR62043717-RA	Chr00	11574798	11581966	j	Protein of unknown function, DUF547
AUR62043717-RA	MSTRG.379	AUR62043717	AUR62043717-RA	Chr00	11574826	11579040	=	Protein of unknown function, DUF547
MSTRG.379.5	MSTRG.379	AUR62043717	AUR62043717-RA	Chr00	11574863	11581966	j	Protein of unknown function, DUF547
MSTRG.379.6	MSTRG.379	AUR62043717	AUR62043717-RA	Chr00	11574863	11581966	n	Protein of unknown function, DUF547
MSTRG.379.7	MSTRG.379	AUR62043717	AUR62043717-RA	Chr00	11574864	11581966	n	Protein of unknown function, DUF547
MSTRG.379.8	MSTRG.379	AUR62043717	AUR62043717-RA	Chr00	11574865	11581966	j	Protein of unknown function, DUF547
MSTRG.379.9	MSTRG.379	AUR62043717	AUR62043717-RA	Chr00	11574865	11581966	j	Protein of unknown function, DUF547
MSTRG.380.1	MSTRG.380	-	-	Chr00	11579470	11579947	u	-
MSTRG.381.1	MSTRG.381	-	-	Chr00	11580265	11580608	u	-
MSTRG.382.1	MSTRG.382	-	-	Chr00	11773823	11774321	u	-
MSTRG.383.1	MSTRG.383	-	-	Chr00	11760628	11760902	u	-
MSTRG.384.1	MSTRG.384	-	-	Chr00	11740073	11740400	u	-
MSTRG.385.1	MSTRG.385	-	-	Chr00	11772579	11772830	u	-
MSTRG.386.1	MSTRG.386	-	-	Chr00	11780302	11780611	u	-
MSTRG.387.1	MSTRG.387	-	-	Chr00	11756582	11757412	u	-
MSTRG.388.1	MSTRG.388	-	-	Chr00	11789856	11790200	u	-
MSTRG.389.1	MSTRG.389	-	-	Chr00	11816509	11816787	u	-
MSTRG.390.1	MSTRG.390	-	-	Chr00	11819285	11819623	u	-
MSTRG.391.1	MSTRG.391	-	-	Chr00	11820021	11820593	u	-
MSTRG.392.1	MSTRG.392	-	-	Chr00	11828338	11831599	u	-
MSTRG.393.1	MSTRG.393	-	-	Chr00	11831711	11832209	u	-
MSTRG.394.1	MSTRG.394	-	-	Chr00	11846646	11847033	u	-
MSTRG.395.1	MSTRG.395	-	-	Chr00	11847464	11848101	u	-
MSTRG.396.1	MSTRG.396	-	-	Chr00	11856226	11856877	u	-
MSTRG.397.1	MSTRG.397	-	-	Chr00	11874558	11874836	u	-
MSTRG.398.1	MSTRG.398	-	-	Chr00	11877333	11877832	u	-
MSTRG.399.1	MSTRG.399	-	-	Chr00	11878068	11878539	u	-
MSTRG.400.1	MSTRG.400	-	-	Chr00	11884679	11885535	u	-
MSTRG.401.1	MSTRG.401	-	-	Chr00	11902190	11902743	u	-
MSTRG.402.1	MSTRG.402	-	-	Chr00	11905055	11906692	u	-
MSTRG.403.1	MSTRG.403	-	-	Chr00	11913988	11914220	u	-
MSTRG.404.1	MSTRG.404	-	-	Chr00	11915563	11915955	u	-
MSTRG.405.1	MSTRG.405	-	-	Chr00	11919577	11920358	u	-
MSTRG.406.1	MSTRG.406	-	-	Chr00	11925248	11926061	u	-
MSTRG.407.1	MSTRG.407	-	-	Chr00	11942412	11943215	u	-
MSTRG.408.1	MSTRG.408	-	-	Chr00	11943625	11944230	u	-
MSTRG.409.1	MSTRG.409	-	-	Chr00	11946451	11946823	u	-
MSTRG.410.1	MSTRG.410	-	-	Chr00	11958423	11959118	u	-
MSTRG.411.1	MSTRG.411	-	-	Chr00	11960070	11960345	u	-
MSTRG.412.1	MSTRG.412	-	-	Chr00	11961072	11961638	u	-
MSTRG.413.1	MSTRG.413	-	-	Chr00	11972520	11972870	u	-
MSTRG.414.1	MSTRG.414	-	-	Chr00	11989695	11990400	u	-
MSTRG.415.1	MSTRG.415	-	-	Chr00	12018580	12019137	u	-
MSTRG.416.1	MSTRG.416	-	-	Chr00	12020879	12021129	u	-
MSTRG.417.1	MSTRG.417	-	-	Chr00	12021566	12021797	u	-
MSTRG.418.1	MSTRG.418	-	-	Chr00	12026785	12027267	u	-
MSTRG.419.1	MSTRG.419	-	-	Chr00	12029596	12030003	u	-
MSTRG.420.1	MSTRG.420	-	-	Chr00	12056833	12057195	u	-
MSTRG.421.1	MSTRG.421	-	-	Chr00	12058562	12059028	u	-
MSTRG.422.1	MSTRG.422	-	-	Chr00	12059603	12060470	u	-
MSTRG.423.1	MSTRG.423	-	-	Chr00	12065972	12066403	u	-
MSTRG.424.1	MSTRG.424	-	-	Chr00	12068018	12068543	u	-
MSTRG.425.1	MSTRG.425	-	-	Chr00	12071240	12071899	u	-
MSTRG.426.1	MSTRG.426	-	-	Chr00	12077450	12077860	u	-
MSTRG.427.1	MSTRG.427	-	-	Chr00	12088719	12089053	u	-
MSTRG.428.1	MSTRG.428	-	-	Chr00	12078198	12078453	u	-
MSTRG.429.1	MSTRG.429	-	-	Chr00	12078597	12078930	u	-
MSTRG.430.1	MSTRG.430	-	-	Chr00	12111865	12112213	u	-
MSTRG.431.1	MSTRG.431	-	-	Chr00	12139046	12139337	u	-
MSTRG.432.1	MSTRG.432	-	-	Chr00	12153220	12153487	u	-
MSTRG.433.1	MSTRG.433	-	-	Chr00	12174479	12174775	u	-
MSTRG.434.1	MSTRG.434	-	-	Chr00	12416689	12416959	u	-
MSTRG.435.1	MSTRG.435	-	-	Chr00	12440308	12440641	u	-
MSTRG.436.1	MSTRG.436	-	-	Chr00	12557368	12557759	u	-
MSTRG.437.1	MSTRG.437	AUR62043719	AUR62043719-RA	Chr00	12090826	12093518	j	autoinhibited Ca2+-ATPase 11
MSTRG.437.2	MSTRG.437	AUR62043719	AUR62043719-RA	Chr00	12090826	12100456	k	autoinhibited Ca(2+)-ATPase, isoform 4
AUR62043719-RA	MSTRG.437	AUR62043719	AUR62043719-RA	Chr00	12091735	12100456	=	autoinhibited Ca(2+)-ATPase, isoform 4
MSTRG.438.1	MSTRG.438	-	-	Chr00	12714198	12714746	u	-
MSTRG.439.1	MSTRG.439	-	-	Chr00	12975829	12976082	u	-
MSTRG.440.1	MSTRG.440	-	-	Chr00	13335480	13335846	u	-
MSTRG.441.1	MSTRG.441	-	-	Chr00	12650496	12650863	u	-
MSTRG.442.1	MSTRG.442	-	-	Chr00	13347368	13347830	u	-
MSTRG.443.1	MSTRG.443	-	-	Chr00	13365681	13365994	u	-
MSTRG.444.1	MSTRG.444	-	-	Chr00	13376588	13377640	u	-
MSTRG.445.1	MSTRG.445	-	-	Chr00	13378838	13379577	u	-
MSTRG.446.1	MSTRG.446	AUR62040531	AUR62040531-RA	Chr00	13366597	13371820	j	Pathogenesis-related thaumatin superfamily protein
AUR62040531-RA	MSTRG.446	AUR62040531	AUR62040531-RA	Chr00	13366597	13368281	=	Pathogenesis-related thaumatin superfamily protein
MSTRG.446.3	MSTRG.446	AUR62040531	AUR62040531-RA	Chr00	13366953	13371820	j	Pathogenesis-related thaumatin superfamily protein
MSTRG.447.1	MSTRG.447	-	-	Chr00	13368620	13369358	u	-
MSTRG.448.1	MSTRG.448	-	-	Chr00	13403925	13404441	u	-
MSTRG.449.1	MSTRG.449	-	-	Chr00	13409662	13409938	u	-
MSTRG.450.1	MSTRG.450	-	-	Chr00	13413425	13413631	u	-
MSTRG.451.1	MSTRG.451	-	-	Chr00	13415140	13415623	u	-
MSTRG.452.1	MSTRG.452	-	-	Chr00	13416334	13416541	u	-
MSTRG.453.1	MSTRG.453	-	-	Chr00	13416688	13417698	u	-
AUR62040532-RA	MSTRG.454	AUR62040532	AUR62040532-RA	Chr00	13388687	13395143	=	GTP-binding family protein
MSTRG.455.1	MSTRG.455	AUR62040532	AUR62040532-RA	Chr00	13394616	13394862	x	-
MSTRG.456.1	MSTRG.456	-	-	Chr00	13446832	13447162	u	-
MSTRG.457.1	MSTRG.457	-	-	Chr00	13452844	13453177	u	-
MSTRG.458.1	MSTRG.458	-	-	Chr00	13455118	13455608	u	-
MSTRG.459.1	MSTRG.459	-	-	Chr00	13466577	13467003	u	-
MSTRG.460.1	MSTRG.460	-	-	Chr00	13460173	13460984	u	-
MSTRG.461.1	MSTRG.461	-	-	Chr00	13460913	13461272	u	-
AUR62040533-RA	MSTRG.462	AUR62040533	AUR62040533-RA	Chr00	13418781	13441168	=	THAUMATIN-LIKE PROTEIN 1
MSTRG.463.1	MSTRG.463	AUR62040533	AUR62040533-RA	Chr00	13418894	13419217	x	THAUMATIN-LIKE PROTEIN 1
MSTRG.464.1	MSTRG.464	AUR62040533	AUR62040533-RA	Chr00	13421187	13421482	i	-
MSTRG.465.1	MSTRG.465	AUR62040533	AUR62040533-RA	Chr00	13441046	13441277	x	-
MSTRG.466.1	MSTRG.466	-	-	Chr00	13517023	13517503	u	-
MSTRG.467.1	MSTRG.467	-	-	Chr00	13518305	13518710	u	-
MSTRG.468.1	MSTRG.468	-	-	Chr00	13530156	13530603	u	-
MSTRG.469.1	MSTRG.469	-	-	Chr00	13534983	13535416	u	-
MSTRG.470.1	MSTRG.470	-	-	Chr00	13537445	13537879	u	-
MSTRG.471.1	MSTRG.471	-	-	Chr00	13538885	13539271	u	-
MSTRG.472.1	MSTRG.472	AUR62040536	AUR62040536-RA	Chr00	13467277	13473062	j	Dynamin related protein 4C
AUR62040536-RA	MSTRG.472	AUR62040536	AUR62040536-RA	Chr00	13469432	13473062	=	Glutathione S-transferase family protein
AUR62040534-RA	MSTRG.473	AUR62040534	AUR62040534-RA	Chr00	13467280	13468456	=	Dynamin related protein 4C
AUR62040535-RA	MSTRG.474	AUR62040535	AUR62040535-RA	Chr00	13468457	13469447	=	Dynamin related protein 4C
MSTRG.475.1	MSTRG.475	-	-	Chr00	13547484	13547932	u	-
MSTRG.476.1	MSTRG.476	-	-	Chr00	13543654	13544108	u	-
MSTRG.477.1	MSTRG.477	AUR62040538	AUR62040538-RA	Chr00	13552893	13553511	p	-
MSTRG.478.1	MSTRG.478	-	-	Chr00	13571534	13572153	u	-
MSTRG.479.1	MSTRG.479	-	-	Chr00	13572632	13573083	u	-
AUR62040538-RA	MSTRG.480	AUR62040538	AUR62040538-RA	Chr00	13554005	13567593	=	Dynamin related protein 4C
MSTRG.481.1	MSTRG.481	AUR62040538	AUR62040538-RA	Chr00	13565871	13566081	i	-
MSTRG.482.1	MSTRG.482	-	-	Chr00	13577956	13578311	u	-
AUR62040541-RA	MSTRG.483	AUR62040541	AUR62040541-RA	Chr00	13582976	13609058	=	-
MSTRG.484.1	MSTRG.484	AUR62040541	AUR62040541-RA	Chr00	13592379	13592642	x	-
MSTRG.485.1	MSTRG.485	AUR62040541	AUR62040541-RA	Chr00	13606695	13607102	i	-
AUR62040542-RA	MSTRG.486	AUR62040542	AUR62040542-RA	Chr00	13613054	13619017	=	Chaperone protein htpG family protein
MSTRG.486.2	MSTRG.486	AUR62040542	AUR62040542-RA	Chr00	13613132	13619017	n	Chaperone protein htpG family protein
MSTRG.487.1	MSTRG.487	-	-	Chr00	13696920	13697295	u	-
MSTRG.488.1	MSTRG.488	-	-	Chr00	13697843	13698474	u	-
AUR62040543-RA	MSTRG.489	AUR62040543	AUR62040543-RA	Chr00	13631784	13646280	=	-
MSTRG.490.1	MSTRG.490	AUR62040543	AUR62040543-RA	Chr00	13641560	13641970	i	-
MSTRG.491.1	MSTRG.491	-	-	Chr00	13698897	13699459	u	-
AUR62040545-RA	MSTRG.492	AUR62040545	AUR62040545-RA	Chr00	13650947	13671831	=	BED zinc finger ;hAT family dimerisation domain
MSTRG.493.1	MSTRG.493	AUR62040545	AUR62040545-RA	Chr00	13658082	13658598	x	-
MSTRG.494.1	MSTRG.494	-	-	Chr00	13726327	13727432	u	-
MSTRG.495.1	MSTRG.495	-	-	Chr00	13720813	13722058	u	-
MSTRG.496.1	MSTRG.496	-	-	Chr00	13731951	13732519	u	-
MSTRG.497.1	MSTRG.497	-	-	Chr00	13734571	13735052	u	-
MSTRG.498.1	MSTRG.498	AUR62040547	AUR62040547-RA	Chr00	13739917	13745484	n	COP1-interacting protein 8
MSTRG.498.2	MSTRG.498	AUR62040547	AUR62040547-RA	Chr00	13739917	13745484	n	COP1-interacting protein 8
AUR62040547-RA	MSTRG.498	AUR62040547	AUR62040547-RA	Chr00	13740372	13741532	=	COP1-interacting protein 8
MSTRG.499.1	MSTRG.499	AUR62040547	AUR62040547-RA	Chr00	13740264	13741803	x	COP1-interacting protein 8
MSTRG.500.1	MSTRG.500	AUR62040548	AUR62040548-RA	Chr00	13745679	13750011	j	Peptidase S24/S26A/S26B/S26C family protein
MSTRG.500.2	MSTRG.500	AUR62040548	AUR62040548-RA	Chr00	13746182	13750011	j	Peptidase S24/S26A/S26B/S26C family protein
AUR62040548-RA	MSTRG.500	AUR62040548	AUR62040548-RA	Chr00	13747735	13749412	=	Peptidase S24/S26A/S26B/S26C family protein
MSTRG.501.1	MSTRG.501	-	-	Chr00	13763362	13763580	u	-
MSTRG.502.1	MSTRG.502	-	-	Chr00	13771071	13771478	u	-
MSTRG.503.1	MSTRG.503	-	-	Chr00	13786208	13786880	u	-
MSTRG.504.1	MSTRG.504	-	-	Chr00	13787403	13788013	u	-
MSTRG.505.1	MSTRG.505	-	-	Chr00	13795406	13795768	u	-
MSTRG.506.1	MSTRG.506	-	-	Chr00	13803169	13803422	u	-
MSTRG.507.1	MSTRG.507	AUR62040549	AUR62040549-RA	Chr00	13751815	13761880	n	DEA(D/H)-box RNA helicase family protein
MSTRG.507.2	MSTRG.507	AUR62040549	AUR62040549-RA	Chr00	13751825	13758226	n	DEA(D/H)-box RNA helicase family protein
AUR62040549-RA	MSTRG.507	AUR62040549	AUR62040549-RA	Chr00	13751860	13761880	=	DEA(D/H)-box RNA helicase family protein
MSTRG.508.1	MSTRG.508	-	-	Chr00	13806189	13807424	u	-
MSTRG.509.1	MSTRG.509	-	-	Chr00	13828372	13828967	u	-
MSTRG.510.1	MSTRG.510	-	-	Chr00	13833071	13833408	u	-
MSTRG.511.1	MSTRG.511	AUR62040550	AUR62040550-RA	Chr00	13812442	13819267	n	Transcription elongation factor (TFIIS) family protein
AUR62040550-RA	MSTRG.511	AUR62040550	AUR62040550-RA	Chr00	13812941	13816161	=	Transcription elongation factor (TFIIS) family protein
MSTRG.512.1	MSTRG.512	-	-	Chr00	13873114	13873485	u	-
MSTRG.513.1	MSTRG.513	-	-	Chr00	13912590	13912872	u	-
AUR62040554-RA	MSTRG.514	AUR62040554	AUR62040554-RA	Chr00	13897735	13903300	=	-
AUR62040553-RA	MSTRG.515	AUR62040553	AUR62040553-RA	Chr00	13885645	13892036	=	Leucine-rich receptor-like protein kinase family protein
MSTRG.516.1	MSTRG.516	-	-	Chr00	13913660	13915374	u	zinc ion binding;nucleic acid binding
MSTRG.517.1	MSTRG.517	-	-	Chr00	13915947	13916220	u	-
MSTRG.518.1	MSTRG.518	-	-	Chr00	13929302	13929797	u	-
MSTRG.519.1	MSTRG.519	-	-	Chr00	13954674	13955008	u	-
MSTRG.520.1	MSTRG.520	-	-	Chr00	13962156	13962375	u	-
MSTRG.521.1	MSTRG.521	AUR62040551	AUR62040551-RA	Chr00	13843477	13866505	j	ATP binding microtubule motor family protein
MSTRG.521.2	MSTRG.521	AUR62040551	AUR62040551-RA	Chr00	13843481	13866505	j	ATP binding microtubule motor family protein
AUR62040551-RA	MSTRG.521	AUR62040551	AUR62040551-RA	Chr00	13843818	13850566	=	ATP binding microtubule motor family protein
MSTRG.522.1	MSTRG.522	-	-	Chr00	13859966	13860429	u	-
AUR62040552-RA	MSTRG.523	AUR62040552	AUR62040552-RA	Chr00	13860442	13863339	=	CONTAINS InterPro DOMAIN/s: Retrotransposon gag protein (InterPro:IPR005162); Has 707 Blast hits to 705 proteins in 25 species: Archae - 0; Bacteria - 0; Metazoa - 4; Fungi - 0; Plants - 703; Viruses - 0; Other Eukaryotes - 0 (source: NCBI BLink).
MSTRG.524.1	MSTRG.524	-	-	Chr00	13977698	13978298	u	-
MSTRG.525.1	MSTRG.525	-	-	Chr00	13963210	13963797	u	-
MSTRG.526.1	MSTRG.526	-	-	Chr00	13975865	13976477	u	-
MSTRG.527.1	MSTRG.527	-	-	Chr00	13979088	13979390	u	-
MSTRG.528.1	MSTRG.528	-	-	Chr00	13981904	13982230	u	-
MSTRG.529.1	MSTRG.529	-	-	Chr00	13989349	13989554	u	-
MSTRG.530.1	MSTRG.530	AUR62040555	AUR62040555-RA	Chr00	14022930	14023373	p	-
MSTRG.531.1	MSTRG.531	-	-	Chr00	14049310	14049940	u	-
MSTRG.532.1	MSTRG.532	-	-	Chr00	14058268	14058511	u	-
MSTRG.533.1	MSTRG.533	-	-	Chr00	14082583	14082864	u	-
MSTRG.534.1	MSTRG.534	-	-	Chr00	14099152	14099448	u	-
MSTRG.535.1	MSTRG.535	-	-	Chr00	14105222	14105736	u	-
MSTRG.536.1	MSTRG.536	-	-	Chr00	14139684	14140344	u	-
AUR62040555-RA	MSTRG.537	AUR62040555	AUR62040555-RA	Chr00	14024327	14032843	=	synaptotagmin A
MSTRG.537.2	MSTRG.537	AUR62040555	AUR62040555-RA	Chr00	14024352	14032685	n	synaptotagmin A
MSTRG.538.1	MSTRG.538	AUR62040555	AUR62040555-RA	Chr00	14028219	14028585	i	-
MSTRG.539.1	MSTRG.539	-	-	Chr00	14119119	14123734	u	-
MSTRG.539.2	MSTRG.539	-	-	Chr00	14119155	14127857	u	-
MSTRG.540.1	MSTRG.540	-	-	Chr00	14126694	14126995	u	-
MSTRG.541.1	MSTRG.541	-	-	Chr00	14183365	14183844	u	-
MSTRG.542.1	MSTRG.542	-	-	Chr00	14141764	14143861	u	-
MSTRG.543.1	MSTRG.543	-	-	Chr00	14187528	14187935	u	-
MSTRG.544.1	MSTRG.544	-	-	Chr00	14206851	14207106	u	-
MSTRG.545.1	MSTRG.545	-	-	Chr00	14188573	14189798	u	-
MSTRG.546.1	MSTRG.546	-	-	Chr00	14188597	14188883	u	-
MSTRG.547.1	MSTRG.547	-	-	Chr00	14209800	14210192	u	-
MSTRG.548.1	MSTRG.548	-	-	Chr00	14210587	14210941	u	-
MSTRG.549.1	MSTRG.549	-	-	Chr00	14210972	14211263	u	-
MSTRG.550.1	MSTRG.550	-	-	Chr00	14232684	14232991	u	-
MSTRG.551.1	MSTRG.551	-	-	Chr00	14233657	14234085	u	-
MSTRG.552.1	MSTRG.552	-	-	Chr00	14218820	14219123	u	-
MSTRG.553.1	MSTRG.553	-	-	Chr00	14254453	14254822	u	-
MSTRG.554.1	MSTRG.554	-	-	Chr00	14256001	14256206	u	-
MSTRG.555.1	MSTRG.555	-	-	Chr00	14258463	14259042	u	-
MSTRG.556.1	MSTRG.556	-	-	Chr00	14260037	14260552	u	-
MSTRG.557.1	MSTRG.557	-	-	Chr00	14283058	14283512	u	-
MSTRG.558.1	MSTRG.558	-	-	Chr00	14314359	14314671	u	-
MSTRG.559.1	MSTRG.559	-	-	Chr00	14319336	14319941	u	-
MSTRG.560.1	MSTRG.560	-	-	Chr00	14322564	14322906	u	-
MSTRG.561.1	MSTRG.561	AUR62040557	AUR62040557-RA	Chr00	14239626	14254061	k	TFIIB zinc-binding protein
MSTRG.561.2	MSTRG.561	AUR62040557	AUR62040557-RA	Chr00	14240132	14254061	k	TFIIB zinc-binding protein
MSTRG.561.3	MSTRG.561	AUR62040557	AUR62040557-RA	Chr00	14240132	14254061	k	TFIIB zinc-binding protein
MSTRG.561.4	MSTRG.561	AUR62040557	AUR62040557-RA	Chr00	14240136	14253397	k	TFIIB zinc-binding protein
MSTRG.561.5	MSTRG.561	AUR62040557	AUR62040557-RA	Chr00	14240331	14252074	k	TFIIB zinc-binding protein
AUR62040557-RA	MSTRG.561	AUR62040557	AUR62040557-RA	Chr00	14240613	14241023	=	TFIIB zinc-binding protein
MSTRG.562.1	MSTRG.562	-	-	Chr00	14243115	14243368	u	-
MSTRG.563.1	MSTRG.563	-	-	Chr00	14252649	14253101	u	-
MSTRG.564.1	MSTRG.564	-	-	Chr00	14332164	14332443	u	-
MSTRG.565.1	MSTRG.565	-	-	Chr00	14338124	14338624	u	-
AUR62040559-RA	MSTRG.566	AUR62040559	AUR62040559-RA	Chr00	14323680	14330035	=	P-glycoprotein 13
MSTRG.566.2	MSTRG.566	AUR62040559	AUR62040559-RA	Chr00	14325210	14325662	n	P-glycoprotein 13
MSTRG.567.1	MSTRG.567	-	-	Chr00	14357497	14357718	u	-
MSTRG.568.1	MSTRG.568	-	-	Chr00	14363635	14364262	u	-
MSTRG.569.1	MSTRG.569	-	-	Chr00	14366680	14367042	u	-
AUR62040561-RA	MSTRG.570	AUR62040561	AUR62040561-RA	Chr00	14344569	14348668	=	RAC-like 3
MSTRG.571.1	MSTRG.571	-	-	Chr00	14381730	14382001	u	-
MSTRG.572.1	MSTRG.572	-	-	Chr00	14386511	14386907	u	-
AUR62040563-RA	MSTRG.573	AUR62040563	AUR62040563-RA	Chr00	14395614	14399172	=	Plant invertase/pectin methylesterase inhibitor superfamily
MSTRG.574.1	MSTRG.574	-	-	Chr00	14433411	14433793	u	-
MSTRG.575.1	MSTRG.575	-	-	Chr00	14452525	14453030	u	-
MSTRG.576.1	MSTRG.576	-	-	Chr00	14456096	14456871	u	-
MSTRG.577.1	MSTRG.577	-	-	Chr00	14475822	14476036	u	-
AUR62040564-RA	MSTRG.578	AUR62040564	AUR62040564-RA	Chr00	14402490	14405698	=	Leucine-rich repeat protein kinase family protein
MSTRG.579.1	MSTRG.579	-	-	Chr00	14407916	14408566	u	-
MSTRG.580.1	MSTRG.580	-	-	Chr00	14411233	14411662	u	-
MSTRG.581.1	MSTRG.581	-	-	Chr00	14416556	14417301	u	-
MSTRG.582.1	MSTRG.582	-	-	Chr00	14417934	14418286	u	-
MSTRG.583.1	MSTRG.583	-	-	Chr00	14500944	14501274	u	-
MSTRG.584.1	MSTRG.584	-	-	Chr00	14502405	14503212	u	-
MSTRG.585.1	MSTRG.585	AUR62040562	AUR62040562-RA	Chr00	14367918	14381503	j	VPS35 homolog B
MSTRG.585.2	MSTRG.585	AUR62040562	AUR62040562-RA	Chr00	14367936	14381503	j	VPS35 homolog B
AUR62040562-RA	MSTRG.585	AUR62040562	AUR62040562-RA	Chr00	14368097	14381503	=	VPS35 homolog B
MSTRG.586.1	MSTRG.586	AUR62040562	AUR62040562-RA	Chr00	14367940	14368478	x	VPS35 homolog B
MSTRG.587.1	MSTRG.587	AUR62040562	AUR62040562-RA	Chr00	14374703	14374914	x	VPS35 homolog B
MSTRG.588.1	MSTRG.588	AUR62040562	AUR62040562-RA	Chr00	14378843	14379063	x	VPS35 homolog B
AUR62040565-RA	MSTRG.589	AUR62040565	AUR62040565-RA	Chr00	14514292	14516862	=	BED zinc finger ;hAT family dimerisation domain
MSTRG.589.2	MSTRG.589	AUR62040565	AUR62040565-RA	Chr00	14516527	14520420	e	unknown protein; BEST Arabidopsis thaliana protein match is: unknown protein (TAIR:AT1G20100.1); Has 258 Blast hits to 235 proteins in 58 species: Archae - 0; Bacteria - 4; Metazoa - 59; Fungi - 16; Plants - 90; Viruses - 0; Other Eukaryotes - 89 (source: NCBI BLink).
MSTRG.590.1	MSTRG.590	AUR62040566	AUR62040566-RA	Chr00	14516000	14520421	j	BED zinc finger ;hAT family dimerisation domain
AUR62040566-RA	MSTRG.590	AUR62040566	AUR62040566-RA	Chr00	14517163	14520421	=	unknown protein; BEST Arabidopsis thaliana protein match is: unknown protein (TAIR:AT4G35940.2); Has 35333 Blast hits to 34131 proteins in 2444 species: Archae - 798; Bacteria - 22429; Metazoa - 974; Fungi - 991; Plants - 531; Viruses - 0; Other Eukaryotes - 9610 (source: NCBI BLink).
MSTRG.591.1	MSTRG.591	-	-	Chr00	14551558	14551904	u	-
AUR62040567-RA	MSTRG.592	AUR62040567	AUR62040567-RA	Chr00	14528356	14539835	=	Glutathione S-transferase family protein
MSTRG.593.1	MSTRG.593	-	-	Chr00	14553919	14554130	u	-
MSTRG.594.1	MSTRG.594	-	-	Chr00	14556930	14557244	u	-
MSTRG.595.1	MSTRG.595	-	-	Chr00	14663867	14664317	u	-
MSTRG.596.1	MSTRG.596	-	-	Chr00	14698542	14698869	u	-
MSTRG.597.1	MSTRG.597	-	-	Chr00	14846459	14846699	u	-
MSTRG.598.1	MSTRG.598	-	-	Chr00	14855865	14856151	u	-
MSTRG.599.1	MSTRG.599	-	-	Chr00	14858468	14858826	u	-
MSTRG.600.1	MSTRG.600	-	-	Chr00	14860135	14860811	u	-
MSTRG.601.1	MSTRG.601	-	-	Chr00	14863213	14863418	u	-
MSTRG.602.1	MSTRG.602	-	-	Chr00	14865242	14866285	u	-
MSTRG.603.1	MSTRG.603	-	-	Chr00	14907588	14907919	u	-
MSTRG.604.1	MSTRG.604	-	-	Chr00	15026635	15027133	u	-
MSTRG.605.1	MSTRG.605	-	-	Chr00	15050810	15051163	u	-
MSTRG.606.1	MSTRG.606	-	-	Chr00	15051400	15051611	u	-
MSTRG.607.1	MSTRG.607	-	-	Chr00	15064129	15064470	u	-
MSTRG.608.1	MSTRG.608	-	-	Chr00	15075735	15076346	u	-
MSTRG.609.1	MSTRG.609	-	-	Chr00	15081668	15082418	u	unknown protein; BEST Arabidopsis thaliana protein match is: unknown protein (TAIR:ATMG00470.1); Has 35333 Blast hits to 34131 proteins in 2444 species: Archae - 798; Bacteria - 22429; Metazoa - 974; Fungi - 991; Plants - 531; Viruses - 0; Other Eukaryotes - 9610 (source: NCBI BLink).
MSTRG.610.1	MSTRG.610	-	-	Chr00	15085033	15085403	u	-
MSTRG.611.1	MSTRG.611	-	-	Chr00	15138419	15138783	u	-
MSTRG.612.1	MSTRG.612	-	-	Chr00	15152409	15152656	u	-
MSTRG.613.1	MSTRG.613	-	-	Chr00	15153126	15153359	u	-
MSTRG.614.1	MSTRG.614	-	-	Chr00	15259265	15259623	u	-
MSTRG.615.1	MSTRG.615	-	-	Chr00	15328393	15328737	u	-
MSTRG.616.1	MSTRG.616	-	-	Chr00	15363893	15364215	u	-
MSTRG.617.1	MSTRG.617	AUR62043716	AUR62043716-RA	Chr00	14878326	14905980	j	oxidoreductase, 2OG-Fe(II) oxygenase family protein
MSTRG.617.2	MSTRG.617	AUR62043715	AUR62043715-RA	Chr00	14892653	14904379	k	RNA-binding (RRM/RBD/RNP motifs) family protein
MSTRG.617.3	MSTRG.617	AUR62043715	AUR62043715-RA	Chr00	14892682	14904379	j	RNA-binding (RRM/RBD/RNP motifs) family protein
AUR62043714-RA	MSTRG.617	AUR62043714	AUR62043714-RA	Chr00	14892789	14895133	=	histone H1-3
AUR62043715-RA	MSTRG.617	AUR62043715	AUR62043715-RA	Chr00	14896247	14904379	=	RNA-binding (RRM/RBD/RNP motifs) family protein
MSTRG.617.6	MSTRG.617	AUR62043715	AUR62043715-RA	Chr00	14896472	14904686	j	RNA-binding (RRM/RBD/RNP motifs) family protein
AUR62043716-RA	MSTRG.617	AUR62043716	AUR62043716-RA	Chr00	14904944	14905980	=	2-oxoglutarate (2OG) and Fe(II)-dependent oxygenase superfamily protein
AUR62043713-RA	MSTRG.618	AUR62043713	AUR62043713-RA	Chr00	14884377	14886251	=	vascular related NAC-domain protein 1
MSTRG.619.1	MSTRG.619	AUR62043713	AUR62043713-RA	Chr00	14887885	14888593	p	-
MSTRG.620.1	MSTRG.620	AUR62043714	AUR62043714-RA	Chr00	14892683	14893317	x	histone H1-3
MSTRG.621.1	MSTRG.621	AUR62043715	AUR62043715-RA	Chr00	14896087	14896441	x	-
MSTRG.622.1	MSTRG.622	AUR62043715	AUR62043715-RA	Chr00	14897092	14898426	x	-
MSTRG.623.1	MSTRG.623	-	-	Chr00	15704508	15704871	u	-
MSTRG.624.1	MSTRG.624	-	-	Chr00	15572556	15572852	u	-
AUR62044028-RA	MSTRG.625	AUR62044028	AUR62044028-RA	Chr00	15487599	15491690	=	ascorbate peroxidase 5
MSTRG.625.2	MSTRG.625	AUR62044028	AUR62044028-RA	Chr00	15487636	15488405	n	ascorbate peroxidase 3
MSTRG.626.1	MSTRG.626	AUR62044028	AUR62044028-RA	Chr00	15487633	15488261	x	-
AUR62044027-RA	MSTRG.627	AUR62044027	AUR62044027-RA	Chr00	15474072	15481911	=	ascorbate peroxidase 3
MSTRG.627.2	MSTRG.627	AUR62044027	AUR62044027-RA	Chr00	15478376	15481911	j	ascorbate peroxidase 3
MSTRG.627.3	MSTRG.627	AUR62044027	AUR62044027-RA	Chr00	15478384	15481911	n	ascorbate peroxidase 5
MSTRG.627.4	MSTRG.627	AUR62044027	AUR62044027-RA	Chr00	15478451	15481911	n	ascorbate peroxidase 3
MSTRG.628.1	MSTRG.628	AUR62044027	AUR62044027-RA	Chr00	15478371	15478807	i	-
MSTRG.629.1	MSTRG.629	-	-	Chr00	15775394	15775764	u	-
MSTRG.630.1	MSTRG.630	-	-	Chr00	15777540	15777914	u	-
MSTRG.631.1	MSTRG.631	AUR62040280	AUR62040280-RA	Chr00	15772692	15773814	x	RING/U-box superfamily protein
AUR62040280-RA	MSTRG.632	AUR62040280	AUR62040280-RA	Chr00	15772812	15773369	=	RING/U-box superfamily protein
MSTRG.633.1	MSTRG.633	-	-	Chr00	15811654	15812249	u	-
MSTRG.634.1	MSTRG.634	-	-	Chr00	15822563	15823045	u	-
MSTRG.635.1	MSTRG.635	-	-	Chr00	15824608	15825519	u	-
MSTRG.636.1	MSTRG.636	-	-	Chr00	15829831	15830284	u	-
MSTRG.637.1	MSTRG.637	AUR62040282	AUR62040282-RA	Chr00	15785304	15786909	x	unknown protein; BEST Arabidopsis thaliana protein match is: unknown protein (TAIR:AT1G31130.1); Has 30201 Blast hits to 17322 proteins in 780 species: Archae - 12; Bacteria - 1396; Metazoa - 17338; Fungi - 3422; Plants - 5037; Viruses - 0; Other Eukaryotes - 2996 (source: NCBI BLink).
AUR62040282-RA	MSTRG.638	AUR62040282	AUR62040282-RA	Chr00	15785874	15797155	=	unknown protein; FUNCTIONS IN: molecular_function unknown; INVOLVED IN: biological_process unknown; LOCATED IN: chloroplast thylakoid membrane; EXPRESSED IN: 23 plant structures; EXPRESSED DURING: 13 growth stages; Has 30201 Blast hits to 17322 proteins in 780 species: Archae - 12; Bacteria - 1396; Metazoa - 17338; Fungi - 3422; Plants - 5037; Viruses - 0; Other Eukaryotes - 2996 (source: NCBI BL…
MSTRG.639.1	MSTRG.639	AUR62040282	AUR62040282-RA	Chr00	15789071	15789396	i	-
MSTRG.640.1	MSTRG.640	-	-	Chr00	15832302	15832589	u	-
MSTRG.641.1	MSTRG.641	-	-	Chr00	15830881	15831175	u	-
MSTRG.642.1	MSTRG.642	-	-	Chr00	15831358	15831610	u	-
AUR62040284-RA	MSTRG.643	AUR62040284	AUR62040284-RA	Chr00	15834318	15838365	=	trehalose phosphatase/synthase 11
AUR62040285-RA	MSTRG.644	AUR62040285	AUR62040285-RA	Chr00	15839966	15849846	=	cyclic nucleotide-gated channel 17
MSTRG.644.2	MSTRG.644	AUR62040285	AUR62040285-RA	Chr00	15839969	15849846	j	cyclic nucleotide-gated channel 17
MSTRG.645.1	MSTRG.645	AUR62040285	AUR62040285-RA	Chr00	15842171	15842444	i	-
MSTRG.646.1	MSTRG.646	AUR62040285	AUR62040285-RA	Chr00	15846260	15846613	x	-
MSTRG.647.1	MSTRG.647	AUR62040285	AUR62040285-RA	Chr00	15847013	15847438	i	-
MSTRG.648.1	MSTRG.648	-	-	Chr00	15865110	15865494	u	-
MSTRG.649.1	MSTRG.649	-	-	Chr00	15863982	15864710	u	-
MSTRG.650.1	MSTRG.650	-	-	Chr00	15883730	15884082	u	-
MSTRG.651.1	MSTRG.651	-	-	Chr00	15852681	15853488	u	-
MSTRG.652.1	MSTRG.652	AUR62040286	AUR62040286-RA	Chr00	15853177	15858812	j	SECY homolog 1
MSTRG.652.2	MSTRG.652	AUR62040286	AUR62040286-RA	Chr00	15853231	15858812	j	SECY homolog 1
AUR62040286-RA	MSTRG.652	AUR62040286	AUR62040286-RA	Chr00	15853728	15858812	=	SECY homolog 1
MSTRG.653.1	MSTRG.653	AUR62040286	AUR62040286-RA	Chr00	15854483	15854832	x	SECY homolog 1
MSTRG.654.1	MSTRG.654	AUR62040286	AUR62040286-RA	Chr00	15856309	15856644	x	SECY homolog 1
MSTRG.655.1	MSTRG.655	-	-	Chr00	15889818	15890185	u	-
MSTRG.656.1	MSTRG.656	-	-	Chr00	15891284	15891486	u	-
MSTRG.657.1	MSTRG.657	-	-	Chr00	15891751	15892245	u	-
MSTRG.658.1	MSTRG.658	AUR62040287	AUR62040287-RA	Chr00	15870820	15875069	m	Double Clp-N motif-containing P-loop nucleoside triphosphate hydrolases superfamily protein
AUR62040287-RA	MSTRG.658	AUR62040287	AUR62040287-RA	Chr00	15870843	15875069	=	Double Clp-N motif-containing P-loop nucleoside triphosphate hydrolases superfamily protein
MSTRG.659.1	MSTRG.659	AUR62040287	AUR62040287-RA	Chr00	15870874	15872335	x	Double Clp-N motif-containing P-loop nucleoside triphosphate hydrolases superfamily protein
MSTRG.660.1	MSTRG.660	-	-	Chr00	15928980	15929877	u	-
MSTRG.661.1	MSTRG.661	-	-	Chr00	15929924	15930458	u	-
MSTRG.662.1	MSTRG.662	-	-	Chr00	15957445	15957831	u	-
MSTRG.663.1	MSTRG.663	-	-	Chr00	15959621	15959972	u	-
MSTRG.664.1	MSTRG.664	-	-	Chr00	15970724	15971066	u	-
MSTRG.665.1	MSTRG.665	-	-	Chr00	15986060	15986284	u	-
MSTRG.666.1	MSTRG.666	-	-	Chr00	16001917	16002269	u	-
MSTRG.667.1	MSTRG.667	-	-	Chr00	16017300	16017652	u	-
MSTRG.668.1	MSTRG.668	-	-	Chr00	16026955	16027242	u	-
MSTRG.669.1	MSTRG.669	-	-	Chr00	16032057	16032354	u	-
MSTRG.670.1	MSTRG.670	-	-	Chr00	16033317	16033747	u	-
MSTRG.671.1	MSTRG.671	-	-	Chr00	16056382	16056586	u	-
MSTRG.672.1	MSTRG.672	-	-	Chr00	16085315	16085522	u	-
MSTRG.673.1	MSTRG.673	-	-	Chr00	16096389	16096741	u	-
MSTRG.674.1	MSTRG.674	AUR62040290	AUR62040290-RA	Chr00	16065217	16076369	j	diacylglycerol kinase 7
AUR62040290-RA	MSTRG.674	AUR62040290	AUR62040290-RA	Chr00	16065559	16076369	=	diacylglycerol kinase 7
MSTRG.675.1	MSTRG.675	AUR62040290	AUR62040290-RA	Chr00	16076039	16076277	x	-
MSTRG.676.1	MSTRG.676	AUR62040288	AUR62040288-RA	Chr00	16034571	16036136	n	BNR/Asp-box repeat family protein
AUR62040288-RA	MSTRG.676	AUR62040288	AUR62040288-RA	Chr00	16035044	16045679	=	BNR/Asp-box repeat family protein
MSTRG.676.3	MSTRG.676	AUR62040288	AUR62040288-RA	Chr00	16038014	16044385	j	BNR/Asp-box repeat family protein
MSTRG.676.4	MSTRG.676	AUR62040288	AUR62040288-RA	Chr00	16038031	16044385	j	BNR/Asp-box repeat family protein
MSTRG.676.5	MSTRG.676	AUR62040288	AUR62040288-RA	Chr00	16038167	16044385	j	BNR/Asp-box repeat family protein
MSTRG.676.6	MSTRG.676	AUR62040288	AUR62040288-RA	Chr00	16039669	16044385	j	BNR/Asp-box repeat family protein
MSTRG.676.7	MSTRG.676	AUR62040288	AUR62040288-RA	Chr00	16039671	16044385	j	BNR/Asp-box repeat family protein
MSTRG.677.1	MSTRG.677	AUR62040288	AUR62040288-RA	Chr00	16038041	16038349	i	-
MSTRG.678.1	MSTRG.678	AUR62040288	AUR62040288-RA	Chr00	16039709	16040381	i	-
MSTRG.679.1	MSTRG.679	AUR62040289	AUR62040289-RA	Chr00	16045578	16055959	j	unknown protein; CONTAINS InterPro DOMAIN/s: Uncharacterised protein family UPF0066 (InterPro:IPR001378); Has 30201 Blast hits to 17322 proteins in 780 species: Archae - 12; Bacteria - 1396; Metazoa - 17338; Fungi - 3422; Plants - 5037; Viruses - 0; Other Eukaryotes - 2996 (source: NCBI BLink).
AUR62040289-RA	MSTRG.679	AUR62040289	AUR62040289-RA	Chr00	16045796	16055959	=	unknown protein; CONTAINS InterPro DOMAIN/s: Uncharacterised protein family UPF0066 (InterPro:IPR001378); Has 30201 Blast hits to 17322 proteins in 780 species: Archae - 12; Bacteria - 1396; Metazoa - 17338; Fungi - 3422; Plants - 5037; Viruses - 0; Other Eukaryotes - 2996 (source: NCBI BLink).
MSTRG.680.1	MSTRG.680	-	-	Chr00	16156197	16156482	u	-
MSTRG.681.1	MSTRG.681	AUR62040293	AUR62040293-RA	Chr00	16159766	16160076	p	-
MSTRG.682.1	MSTRG.682	-	-	Chr00	16111515	16111972	u	-
AUR62040291-RA	MSTRG.683	AUR62040291	AUR62040291-RA	Chr00	16112249	16128470	=	Protein kinase superfamily protein
MSTRG.683.2	MSTRG.683	AUR62040291	AUR62040291-RA	Chr00	16123156	16128470	n	Protein kinase superfamily protein
MSTRG.684.1	MSTRG.684	AUR62040291	AUR62040291-RA	Chr00	16121777	16122040	i	-
MSTRG.685.1	MSTRG.685	AUR62040291	AUR62040291-RA	Chr00	16128029	16128558	x	-
MSTRG.686.1	MSTRG.686	-	-	Chr00	16160922	16161138	u	-
MSTRG.687.1	MSTRG.687	AUR62040293	AUR62040293-RA	Chr00	16157413	16159305	j	CONSTANS-like 5
AUR62040293-RA	MSTRG.687	AUR62040293	AUR62040293-RA	Chr00	16157542	16159305	=	CONSTANS-like 3
MSTRG.688.1	MSTRG.688	-	-	Chr00	16193307	16193660	u	-
AUR62040294-RA	MSTRG.689	AUR62040294	AUR62040294-RA	Chr00	16183493	16192872	=	ADP-ribosylation factor 3
MSTRG.689.2	MSTRG.689	AUR62040294	AUR62040294-RA	Chr00	16183536	16192872	j	ADP-ribosylation factor 3
AUR62040296-RA	MSTRG.690	AUR62040296	AUR62040296-RA	Chr00	16194615	16201106	=	xylose isomerase family protein
MSTRG.690.2	MSTRG.690	AUR62040296	AUR62040296-RA	Chr00	16194649	16202069	j	xylose isomerase family protein
MSTRG.690.3	MSTRG.690	AUR62040296	AUR62040296-RA	Chr00	16194649	16202069	j	xylose isomerase family protein
MSTRG.691.1	MSTRG.691	-	-	Chr00	16260759	16261255	u	-
MSTRG.692.1	MSTRG.692	-	-	Chr00	16253777	16254046	u	-
AUR62040299-RA	MSTRG.693	AUR62040299	AUR62040299-RA	Chr00	16254159	16254590	=	-
MSTRG.694.1	MSTRG.694	-	-	Chr00	16262513	16262802	u	-
MSTRG.695.1	MSTRG.695	-	-	Chr00	16263031	16263327	u	-
MSTRG.696.1	MSTRG.696	-	-	Chr00	16264560	16264948	u	-
MSTRG.697.1	MSTRG.697	AUR62040300	AUR62040300-RA	Chr00	16269044	16270008	p	CAP (Cysteine-rich secretory proteins, Antigen 5, and Pathogenesis-related 1 protein) superfamily protein
MSTRG.698.1	MSTRG.698	AUR62040298	AUR62040298-RA	Chr00	16208710	16253069	j	alpha/beta-Hydrolases superfamily protein
MSTRG.698.2	MSTRG.698	AUR62040298	AUR62040298-RA	Chr00	16248156	16253069	j	alpha/beta-Hydrolases superfamily protein
AUR62040298-RA	MSTRG.698	AUR62040298	AUR62040298-RA	Chr00	16249568	16253069	=	alpha/beta-Hydrolases superfamily protein
MSTRG.699.1	MSTRG.699	-	-	Chr00	16220525	16220787	u	-
MSTRG.700.1	MSTRG.700	-	-	Chr00	16240300	16240566	u	-
MSTRG.701.1	MSTRG.701	AUR62040298	AUR62040298-RA	Chr00	16249091	16249922	x	alpha/beta-Hydrolases superfamily protein
MSTRG.702.1	MSTRG.702	-	-	Chr00	16273959	16274567	u	-
MSTRG.703.1	MSTRG.703	-	-	Chr00	16274931	16275328	u	-
MSTRG.704.1	MSTRG.704	-	-	Chr00	16281312	16281726	u	-
MSTRG.705.1	MSTRG.705	AUR62040301	AUR62040301-RA	Chr00	16294344	16295040	p	-
MSTRG.706.1	MSTRG.706	-	-	Chr00	16305633	16306062	u	-
MSTRG.707.1	MSTRG.707	-	-	Chr00	16308008	16308484	u	-
MSTRG.708.1	MSTRG.708	AUR62040302	AUR62040302-RA	Chr00	16296350	16303866	j	regulatory particle AAA-ATPase 2A
AUR62040302-RA	MSTRG.708	AUR62040302	AUR62040302-RA	Chr00	16296361	16303866	=	regulatory particle AAA-ATPase 2A
AUR62040301-RA	MSTRG.709	AUR62040301	AUR62040301-RA	Chr00	16283516	16293326	=	FGGY family of carbohydrate kinase
MSTRG.709.2	MSTRG.709	AUR62040301	AUR62040301-RA	Chr00	16283585	16293326	j	FGGY family of carbohydrate kinase
MSTRG.710.1	MSTRG.710	AUR62040301	AUR62040301-RA	Chr00	16283530	16284007	x	-
MSTRG.711.1	MSTRG.711	-	-	Chr00	16329378	16329663	u	-
MSTRG.712.1	MSTRG.712	-	-	Chr00	16330931	16331301	u	-
MSTRG.713.1	MSTRG.713	AUR62040305	AUR62040305-RA	Chr00	16331262	16332974	j	myb domain protein 36
MSTRG.713.2	MSTRG.713	AUR62040305	AUR62040305-RA	Chr00	16331273	16332974	j	myb domain protein 36
AUR62040305-RA	MSTRG.713	AUR62040305	AUR62040305-RA	Chr00	16331410	16331874	=	myb domain protein 36
MSTRG.714.1	MSTRG.714	AUR62040303	AUR62040303-RA	Chr00	16309356	16319145	m	Protein kinase superfamily protein with octicosapeptide/Phox/Bem1p domain
MSTRG.714.2	MSTRG.714	AUR62040303	AUR62040303-RA	Chr00	16309361	16310329	o	Protein kinase superfamily protein with octicosapeptide/Phox/Bem1p domain
MSTRG.714.3	MSTRG.714	AUR62040303	AUR62040303-RA	Chr00	16309374	16319539	j	Protein kinase superfamily protein with octicosapeptide/Phox/Bem1p domain
AUR62040303-RA	MSTRG.714	AUR62040303	AUR62040303-RA	Chr00	16309999	16319145	=	Protein kinase superfamily protein with octicosapeptide/Phox/Bem1p domain
MSTRG.715.1	MSTRG.715	AUR62040303	AUR62040303-RA	Chr00	16309360	16310115	x	Protein kinase superfamily protein with octicosapeptide/Phox/Bem1p domain
AUR62040304-RA	MSTRG.716	AUR62040304	AUR62040304-RA	Chr00	16319383	16321057	=	Ribosomal protein L35Ae family protein
MSTRG.717.1	MSTRG.717	AUR62040306	AUR62040306-RA	Chr00	16337462	16349566	j	adenosylmethionine-8-amino-7-oxononanoate transaminases
MSTRG.717.2	MSTRG.717	AUR62040306	AUR62040306-RA	Chr00	16337462	16349566	j	adenosylmethionine-8-amino-7-oxononanoate transaminases
AUR62040306-RA	MSTRG.717	AUR62040306	AUR62040306-RA	Chr00	16337650	16349566	=	adenosylmethionine-8-amino-7-oxononanoate transaminases
MSTRG.718.1	MSTRG.718	AUR62040306	AUR62040306-RA	Chr00	16340580	16341065	i	-
MSTRG.719.1	MSTRG.719	AUR62040306	AUR62040306-RA	Chr00	16342311	16342551	x	adenosylmethionine-8-amino-7-oxononanoate transaminases
MSTRG.720.1	MSTRG.720	AUR62040307	AUR62040307-RA	Chr00	16350836	16358398	j	Calmodulin-binding protein
AUR62040307-RA	MSTRG.720	AUR62040307	AUR62040307-RA	Chr00	16350929	16358398	=	Calmodulin-binding protein
MSTRG.721.1	MSTRG.721	AUR62040307	AUR62040307-RA	Chr00	16357324	16358382	x	Calmodulin-binding protein
MSTRG.722.1	MSTRG.722	-	-	Chr00	16370369	16370622	u	-
MSTRG.723.1	MSTRG.723	-	-	Chr00	16372009	16372312	u	-
MSTRG.724.1	MSTRG.724	-	-	Chr00	16378855	16379327	u	-
MSTRG.725.1	MSTRG.725	-	-	Chr00	16381388	16381641	u	-
MSTRG.726.1	MSTRG.726	AUR62040308	AUR62040308-RA	Chr00	16361166	16365017	j	frataxin homolog
MSTRG.726.2	MSTRG.726	AUR62040308	AUR62040308-RA	Chr00	16361194	16363849	j	frataxin homolog
MSTRG.726.3	MSTRG.726	AUR62040308	AUR62040308-RA	Chr00	16361280	16365017	j	frataxin homolog
AUR62040308-RA	MSTRG.726	AUR62040308	AUR62040308-RA	Chr00	16361483	16365017	=	frataxin homolog
MSTRG.726.5	MSTRG.726	AUR62040308	AUR62040308-RA	Chr00	16363057	16363774	j	-
MSTRG.727.1	MSTRG.727	AUR62040308	AUR62040308-RA	Chr00	16361312	16361614	x	frataxin homolog
MSTRG.728.1	MSTRG.728	-	-	Chr00	16425813	16426073	u	-
MSTRG.729.1	MSTRG.729	AUR62040310	AUR62040310-RA	Chr00	16396188	16410291	x	4-coumarate:CoA ligase 1
AUR62040309-RA	MSTRG.730	AUR62040309	AUR62040309-RA	Chr00	16398026	16398496	=	zinc finger protein 2
MSTRG.731.1	MSTRG.731	-	-	Chr00	16404494	16404860	u	-
AUR62040310-RA	MSTRG.732	AUR62040310	AUR62040310-RA	Chr00	16410020	16416896	=	4-coumarate:CoA ligase 1
MSTRG.733.1	MSTRG.733	AUR62040311	AUR62040311-RA	Chr00	16426305	16428041	x	Galactosyltransferase family protein
AUR62040311-RA	MSTRG.734	AUR62040311	AUR62040311-RA	Chr00	16426915	16427919	=	Galactosyltransferase family protein
MSTRG.735.1	MSTRG.735	-	-	Chr00	16444738	16444961	u	-
MSTRG.736.1	MSTRG.736	-	-	Chr00	16450776	16451089	u	-
MSTRG.737.1	MSTRG.737	-	-	Chr00	16453497	16453828	u	-
MSTRG.738.1	MSTRG.738	AUR62040313	AUR62040313-RA	Chr00	16433965	16442353	j	voltage dependent anion channel 4
MSTRG.738.2	MSTRG.738	AUR62040313	AUR62040313-RA	Chr00	16433965	16442353	j	voltage dependent anion channel 4
MSTRG.738.3	MSTRG.738	AUR62040313	AUR62040313-RA	Chr00	16433974	16442353	j	voltage dependent anion channel 4
AUR62040313-RA	MSTRG.738	AUR62040313	AUR62040313-RA	Chr00	16434395	16442353	=	voltage dependent anion channel 4
MSTRG.739.1	MSTRG.739	-	-	Chr00	16471801	16472047	u	-
MSTRG.740.1	MSTRG.740	AUR62040314	AUR62040314-RA	Chr00	16459495	16462126	x	P-loop containing nucleoside triphosphate hydrolases superfamily protein
AUR62040314-RA	MSTRG.741	AUR62040314	AUR62040314-RA	Chr00	16460208	16461743	=	P-loop containing nucleoside triphosphate hydrolases superfamily protein
AUR62040316-RA	MSTRG.742	AUR62040316	AUR62040316-RA	Chr00	16481305	16484714	=	Leucine-rich receptor-like protein kinase family protein
MSTRG.743.1	MSTRG.743	AUR62040316	AUR62040316-RA	Chr00	16482333	16482675	x	Protein kinase family protein with leucine-rich repeat domain
AUR62040315-RA	MSTRG.744	AUR62040315	AUR62040315-RA	Chr00	16473185	16479438	=	SET domain-containing protein
MSTRG.745.1	MSTRG.745	AUR62040315	AUR62040315-RA	Chr00	16475199	16475576	x	SET domain-containing protein
MSTRG.746.1	MSTRG.746	-	-	Chr00	16492401	16492984	u	-
MSTRG.747.1	MSTRG.747	-	-	Chr00	16501406	16501719	u	-
MSTRG.748.1	MSTRG.748	-	-	Chr00	16522518	16523150	u	-
MSTRG.749.1	MSTRG.749	-	-	Chr00	16670609	16671615	u	-
MSTRG.750.1	MSTRG.750	-	-	Chr00	16510151	16510522	u	-
MSTRG.751.1	MSTRG.751	AUR62040317	AUR62040317-RA	Chr00	16510590	16512848	m	P-loop containing nucleoside triphosphate hydrolases superfamily protein
AUR62040317-RA	MSTRG.751	AUR62040317	AUR62040317-RA	Chr00	16510867	16512848	=	P-loop containing nucleoside triphosphate hydrolases superfamily protein
MSTRG.752.1	MSTRG.752	-	-	Chr00	16837777	16838430	u	-
MSTRG.753.1	MSTRG.753	-	-	Chr00	16904481	16904943	u	-
MSTRG.754.1	MSTRG.754	-	-	Chr00	16912881	16913175	u	-
MSTRG.755.1	MSTRG.755	-	-	Chr00	17254122	17254854	u	-
AUR62044278-RA	MSTRG.756	AUR62044278	AUR62044278-RA	Chr00	17222218	17234311	=	ankyrin repeat family protein
MSTRG.757.1	MSTRG.757	AUR62044278	AUR62044278-RA	Chr00	17223123	17223653	i	-
MSTRG.758.1	MSTRG.758	AUR62044278	AUR62044278-RA	Chr00	17232259	17232490	i	-
AUR62044277-RA	MSTRG.759	AUR62044277	AUR62044277-RA	Chr00	17212718	17221777	=	Cleavage and polyadenylation specificity factor (CPSF) A subunit protein
MSTRG.759.2	MSTRG.759	AUR62044277	AUR62044277-RA	Chr00	17212990	17221777	m	Cleavage and polyadenylation specificity factor (CPSF) A subunit protein
MSTRG.760.1	MSTRG.760	AUR62044277	AUR62044277-RA	Chr00	17213011	17213236	x	Cleavage and polyadenylation specificity factor (CPSF) A subunit protein
MSTRG.761.1	MSTRG.761	AUR62044277	AUR62044277-RA	Chr00	17218087	17218422	x	Cleavage and polyadenylation specificity factor (CPSF) A subunit protein
MSTRG.762.1	MSTRG.762	-	-	Chr00	17325632	17326241	u	-
MSTRG.763.1	MSTRG.763	-	-	Chr00	17330584	17331158	u	FRS (FAR1 Related Sequences) transcription factor family
AUR62044433-RA	MSTRG.764	AUR62044433	AUR62044433-RA	Chr00	17310428	17322821	=	cytochrome P450, family 72, subfamily A, polypeptide 13
MSTRG.764.2	MSTRG.764	AUR62044433	AUR62044433-RA	Chr00	17310653	17322821	j	cytochrome P450, family 72, subfamily A, polypeptide 15
MSTRG.764.3	MSTRG.764	AUR62044433	AUR62044433-RA	Chr00	17319349	17322821	j	cytochrome P450, family 72, subfamily A, polypeptide 15
MSTRG.764.4	MSTRG.764	AUR62044433	AUR62044433-RA	Chr00	17319400	17322821	j	cytochrome P450, family 72, subfamily A, polypeptide 13
MSTRG.765.1	MSTRG.765	AUR62044433	AUR62044433-RA	Chr00	17316854	17318318	i	-
MSTRG.766.1	MSTRG.766	-	-	Chr00	17489904	17490243	u	-
MSTRG.767.1	MSTRG.767	-	-	Chr00	17505752	17506049	u	-
MSTRG.768.1	MSTRG.768	-	-	Chr00	17512890	17513286	u	-
MSTRG.769.1	MSTRG.769	-	-	Chr00	17690446	17690716	u	-
MSTRG.770.1	MSTRG.770	-	-	Chr00	17746233	17747008	u	-
MSTRG.771.1	MSTRG.771	AUR62044656	AUR62044656-RA	Chr00	17341512	17400976	j	GTP binding Elongation factor Tu family protein
AUR62044656-RA	MSTRG.771	AUR62044656	AUR62044656-RA	Chr00	17397661	17400976	=	GTP binding Elongation factor Tu family protein
AUR62044244-RA	MSTRG.772	AUR62044244	AUR62044244-RA	Chr00	17353758	17358776	=	2-oxoglutarate dehydrogenase, E1 component
AUR62044245-RA	MSTRG.773	AUR62044245	AUR62044245-RA	Chr00	17364384	17364821	=	-
AUR62044246-RA	MSTRG.774	AUR62044246	AUR62044246-RA	Chr00	17364876	17365502	=	-
MSTRG.775.1	MSTRG.775	-	-	Chr00	17754626	17754829	u	-
AUR62044215-RA	MSTRG.776	AUR62044215	AUR62044215-RA	Chr00	17749397	17750717	=	armadillo repeat only 2
MSTRG.777.1	MSTRG.777	AUR62044215	AUR62044215-RA	Chr00	17749424	17751464	x	armadillo repeat only 2
AUR62044216-RA	MSTRG.778	AUR62044216	AUR62044216-RA	Chr00	17750746	17751325	=	armadillo repeat only 2
MSTRG.779.1	MSTRG.779	-	-	Chr00	17756281	17762086	u	-
MSTRG.779.2	MSTRG.779	-	-	Chr00	17756344	17765243	u	-
MSTRG.780.1	MSTRG.780	-	-	Chr00	17756399	17756711	u	-
MSTRG.781.1	MSTRG.781	-	-	Chr00	17757354	17757734	u	-
MSTRG.782.1	MSTRG.782	-	-	Chr00	17761352	17761713	u	-
MSTRG.783.1	MSTRG.783	-	-	Chr00	17762791	17763091	u	-
AUR62044217-RA	MSTRG.784	AUR62044217	AUR62044217-RA	Chr00	17766902	17770125	=	ferredoxin-NADP(+)-oxidoreductase 2
MSTRG.785.1	MSTRG.785	-	-	Chr00	17787613	17787826	u	-
MSTRG.786.1	MSTRG.786	-	-	Chr00	17854472	17854763	u	-
MSTRG.787.1	MSTRG.787	-	-	Chr00	17857941	17858666	u	-
MSTRG.788.1	MSTRG.788	AUR62044651	AUR62044651-RA	Chr00	17782287	17786128	j	Duplicated homeodomain-like superfamily protein
AUR62044651-RA	MSTRG.788	AUR62044651	AUR62044651-RA	Chr00	17782576	17786128	=	Duplicated homeodomain-like superfamily protein
MSTRG.789.1	MSTRG.789	AUR62044651	AUR62044651-RA	Chr00	17784199	17786102	x	Duplicated homeodomain-like superfamily protein
MSTRG.790.1	MSTRG.790	-	-	Chr00	17958275	17959024	u	-
MSTRG.791.1	MSTRG.791	-	-	Chr00	17960492	17961018	u	-
AUR62044483-RA	MSTRG.792	AUR62044483	AUR62044483-RA	Chr00	17961619	17962296	=	Kunitz family trypsin and protease inhibitor protein
MSTRG.793.1	MSTRG.793	-	-	Chr00	18204154	18204378	u	-
MSTRG.794.1	MSTRG.794	-	-	Chr00	18001740	18002104	u	-
MSTRG.795.1	MSTRG.795	-	-	Chr00	18003265	18003618	u	-
MSTRG.796.1	MSTRG.796	-	-	Chr00	18274454	18274792	u	-
MSTRG.797.1	MSTRG.797	-	-	Chr00	18294457	18294767	u	-
MSTRG.798.1	MSTRG.798	-	-	Chr00	18557491	18557713	u	-
MSTRG.799.1	MSTRG.799	-	-	Chr00	18604878	18605286	u	-
MSTRG.800.1	MSTRG.800	-	-	Chr00	18585664	18589546	u	-
MSTRG.801.1	MSTRG.801	-	-	Chr00	18608955	18609175	u	-
MSTRG.802.1	MSTRG.802	-	-	Chr00	18609790	18610144	u	-
MSTRG.803.1	MSTRG.803	-	-	Chr00	18688779	18689110	u	-
MSTRG.804.1	MSTRG.804	-	-	Chr00	18806441	18806947	u	-
MSTRG.805.1	MSTRG.805	-	-	Chr00	18813593	18813831	u	-
MSTRG.806.1	MSTRG.806	-	-	Chr00	18818399	18818726	u	-
MSTRG.807.1	MSTRG.807	-	-	Chr00	18819789	18820128	u	-
MSTRG.808.1	MSTRG.808	-	-	Chr00	18822175	18822515	u	-
MSTRG.809.1	MSTRG.809	-	-	Chr00	18851293	18851543	u	-
MSTRG.810.1	MSTRG.810	AUR62043428	AUR62043428-RA	Chr00	18834147	18836350	x	alpha/beta-Hydrolases superfamily protein
AUR62043428-RA	MSTRG.811	AUR62043428	AUR62043428-RA	Chr00	18834254	18835225	=	alpha/beta-Hydrolases superfamily protein
MSTRG.812.1	MSTRG.812	-	-	Chr00	18856240	18856848	u	-
MSTRG.813.1	MSTRG.813	-	-	Chr00	18857234	18857688	u	-
MSTRG.814.1	MSTRG.814	-	-	Chr00	18862002	18862228	u	-
MSTRG.815.1	MSTRG.815	-	-	Chr00	18862459	18862844	u	-
MSTRG.816.1	MSTRG.816	-	-	Chr00	18912917	18913249	u	-
MSTRG.817.1	MSTRG.817	-	-	Chr00	18931433	18931830	u	-
MSTRG.818.1	MSTRG.818	-	-	Chr00	18863271	18870092	u	-
MSTRG.819.1	MSTRG.819	-	-	Chr00	18938294	18938804	u	-
MSTRG.820.1	MSTRG.820	-	-	Chr00	18940424	18940647	u	-
MSTRG.821.1	MSTRG.821	-	-	Chr00	18941120	18941647	u	-
MSTRG.822.1	MSTRG.822	-	-	Chr00	18945116	18945759	u	-
MSTRG.823.1	MSTRG.823	-	-	Chr00	18952108	18952450	u	-
MSTRG.824.1	MSTRG.824	-	-	Chr00	18952918	18953184	u	-
MSTRG.825.1	MSTRG.825	-	-	Chr00	18961845	18962282	u	-
MSTRG.826.1	MSTRG.826	-	-	Chr00	18977418	18978069	u	-
MSTRG.827.1	MSTRG.827	-	-	Chr00	18983099	18983534	u	-
MSTRG.828.1	MSTRG.828	-	-	Chr00	18992070	18992569	u	-
MSTRG.829.1	MSTRG.829	-	-	Chr00	18995348	18995921	u	-
MSTRG.830.1	MSTRG.830	-	-	Chr00	18997584	18997929	u	-
MSTRG.831.1	MSTRG.831	-	-	Chr00	19016744	19017073	u	-
MSTRG.832.1	MSTRG.832	AUR62043429	AUR62043429-RA	Chr00	19015220	19016164	x	FASCICLIN-like arabinoogalactan 9
AUR62043429-RA	MSTRG.833	AUR62043429	AUR62043429-RA	Chr00	19015341	19016108	=	FASCICLIN-like arabinoogalactan 9
MSTRG.834.1	MSTRG.834	-	-	Chr00	19017367	19018786	u	-
MSTRG.835.1	MSTRG.835	-	-	Chr00	19019079	19020166	u	-
MSTRG.836.1	MSTRG.836	-	-	Chr00	19021736	19022089	u	-
MSTRG.837.1	MSTRG.837	-	-	Chr00	19030933	19032181	u	-
MSTRG.838.1	MSTRG.838	-	-	Chr00	19042273	19042494	u	-
MSTRG.839.1	MSTRG.839	AUR62043430	AUR62043430-RA	Chr00	19023625	19030150	k	-
AUR62043430-RA	MSTRG.839	AUR62043430	AUR62043430-RA	Chr00	19028738	19030150	k	-
MSTRG.840.1	MSTRG.840	-	-	Chr00	19053487	19053782	u	-
MSTRG.841.1	MSTRG.841	-	-	Chr00	19057573	19059271	u	-
MSTRG.842.1	MSTRG.842	-	-	Chr00	19060040	19060515	u	-
MSTRG.843.1	MSTRG.843	-	-	Chr00	19090971	19091388	u	-
MSTRG.844.1	MSTRG.844	-	-	Chr00	19093791	19094159	u	-
MSTRG.845.1	MSTRG.845	-	-	Chr00	19110050	19110386	u	-
MSTRG.846.1	MSTRG.846	-	-	Chr00	19110700	19110997	u	-
MSTRG.847.1	MSTRG.847	-	-	Chr00	19122172	19122444	u	-
MSTRG.848.1	MSTRG.848	-	-	Chr00	19129614	19129872	u	-
MSTRG.849.1	MSTRG.849	-	-	Chr00	19133299	19133654	u	-
MSTRG.850.1	MSTRG.850	-	-	Chr00	19140668	19140945	u	-
MSTRG.851.1	MSTRG.851	-	-	Chr00	19146957	19147527	u	-
MSTRG.852.1	MSTRG.852	-	-	Chr00	19156199	19156654	u	-
MSTRG.853.1	MSTRG.853	-	-	Chr00	19157301	19157769	u	-
MSTRG.854.1	MSTRG.854	-	-	Chr00	19159543	19159862	u	-
MSTRG.855.1	MSTRG.855	-	-	Chr00	19162049	19162568	u	-
MSTRG.856.1	MSTRG.856	-	-	Chr00	19174905	19175637	u	-
MSTRG.857.1	MSTRG.857	-	-	Chr00	19187895	19188133	u	-
MSTRG.858.1	MSTRG.858	-	-	Chr00	19188910	19189406	u	-
MSTRG.859.1	MSTRG.859	-	-	Chr00	19203106	19203383	u	-
MSTRG.860.1	MSTRG.860	-	-	Chr00	19203783	19204296	u	-
MSTRG.861.1	MSTRG.861	-	-	Chr00	19239302	19239626	u	-
MSTRG.862.1	MSTRG.862	-	-	Chr00	19254798	19254999	u	-
MSTRG.863.1	MSTRG.863	-	-	Chr00	19260062	19260281	u	-
MSTRG.864.1	MSTRG.864	-	-	Chr00	19270328	19270529	u	-
MSTRG.865.1	MSTRG.865	-	-	Chr00	19291348	19291918	u	-
MSTRG.866.1	MSTRG.866	-	-	Chr00	19315325	19316192	u	-
MSTRG.867.1	MSTRG.867	-	-	Chr00	19214661	19218597	u	Core-2/I-branching beta-1,6-N-acetylglucosaminyltransferase family protein
MSTRG.867.2	MSTRG.867	-	-	Chr00	19214664	19218597	u	Core-2/I-branching beta-1,6-N-acetylglucosaminyltransferase family protein
MSTRG.867.3	MSTRG.867	-	-	Chr00	19214664	19218597	u	Core-2/I-branching beta-1,6-N-acetylglucosaminyltransferase family protein
MSTRG.867.4	MSTRG.867	-	-	Chr00	19214672	19218597	u	Core-2/I-branching beta-1,6-N-acetylglucosaminyltransferase family protein
MSTRG.868.1	MSTRG.868	-	-	Chr00	19325647	19325990	u	-
MSTRG.869.1	MSTRG.869	-	-	Chr00	19321156	19321509	u	-
MSTRG.870.1	MSTRG.870	-	-	Chr00	19336197	19336408	u	-
MSTRG.871.1	MSTRG.871	-	-	Chr00	19349771	19350341	u	-
MSTRG.872.1	MSTRG.872	-	-	Chr00	19352025	19352355	u	-
MSTRG.873.1	MSTRG.873	-	-	Chr00	19354491	19354762	u	-
MSTRG.874.1	MSTRG.874	-	-	Chr00	19396094	19396426	u	-
MSTRG.875.1	MSTRG.875	-	-	Chr00	19397091	19397342	u	-
MSTRG.876.1	MSTRG.876	-	-	Chr00	19406930	19407153	u	-
MSTRG.877.1	MSTRG.877	-	-	Chr00	19410641	19411104	u	-
MSTRG.878.1	MSTRG.878	-	-	Chr00	19411346	19411561	u	-
MSTRG.879.1	MSTRG.879	AUR62043431	AUR62043431-RA	Chr00	19377074	19377862	x	Thioredoxin superfamily protein
AUR62043431-RA	MSTRG.880	AUR62043431	AUR62043431-RA	Chr00	19377126	19377569	=	Thioredoxin superfamily protein
MSTRG.881.1	MSTRG.881	AUR62043432	AUR62043432-RA	Chr00	19378834	19394762	j	unknown protein; FUNCTIONS IN: molecular_function unknown; INVOLVED IN: biological_process unknown; LOCATED IN: chloroplast; EXPRESSED IN: 18 plant structures; EXPRESSED DURING: 13 growth stages; Has 35333 Blast hits to 34131 proteins in 2444 species: Archae - 798; Bacteria - 22429; Metazoa - 974; Fungi - 991; Plants - 531; Viruses - 0; Other Eukaryotes - 9610 (source: NCBI BLink).
AUR62043432-RA	MSTRG.881	AUR62043432	AUR62043432-RA	Chr00	19379145	19380772	=	-
MSTRG.882.1	MSTRG.882	AUR62043432	AUR62043432-RA	Chr00	19379072	19379931	x	-
MSTRG.883.1	MSTRG.883	-	-	Chr00	19394291	19394593	u	unknown protein; FUNCTIONS IN: molecular_function unknown; INVOLVED IN: biological_process unknown; LOCATED IN: chloroplast; EXPRESSED IN: 18 plant structures; EXPRESSED DURING: 13 growth stages; Has 35333 Blast hits to 34131 proteins in 2444 species: Archae - 798; Bacteria - 22429; Metazoa - 974; Fungi - 991; Plants - 531; Viruses - 0; Other Eukaryotes - 9610 (source: NCBI BLink).
MSTRG.884.1	MSTRG.884	-	-	Chr00	19430358	19430710	u	-
MSTRG.885.1	MSTRG.885	-	-	Chr00	19414431	19414721	u	-
MSTRG.886.1	MSTRG.886	-	-	Chr00	19435333	19435773	u	-
MSTRG.887.1	MSTRG.887	-	-	Chr00	19480444	19480783	u	-
MSTRG.888.1	MSTRG.888	-	-	Chr00	19481451	19481800	u	-
MSTRG.889.1	MSTRG.889	-	-	Chr00	19483292	19483879	u	-
MSTRG.890.1	MSTRG.890	-	-	Chr00	19493305	19493949	u	-
MSTRG.891.1	MSTRG.891	-	-	Chr00	19530153	19530469	u	-
MSTRG.892.1	MSTRG.892	-	-	Chr00	19536856	19537229	u	-
MSTRG.893.1	MSTRG.893	-	-	Chr00	19499517	19502359	u	-
MSTRG.893.2	MSTRG.893	-	-	Chr00	19499592	19500955	u	-
MSTRG.894.1	MSTRG.894	-	-	Chr00	19551220	19552164	u	-
MSTRG.895.1	MSTRG.895	-	-	Chr00	19554673	19554942	u	-
MSTRG.896.1	MSTRG.896	-	-	Chr00	19559206	19559922	u	-
MSTRG.897.1	MSTRG.897	-	-	Chr00	19560418	19560883	u	-
MSTRG.898.1	MSTRG.898	AUR62043435	AUR62043435-RA	Chr00	19598597	19599037	p	-
MSTRG.899.1	MSTRG.899	-	-	Chr00	19603125	19603683	u	-
MSTRG.900.1	MSTRG.900	-	-	Chr00	19605537	19605873	u	-
MSTRG.901.1	MSTRG.901	-	-	Chr00	19563812	19564603	u	NAC domain containing protein 73
MSTRG.902.1	MSTRG.902	AUR62043434	AUR62043434-RA	Chr00	19563818	19575871	j	NAC domain containing protein 73
MSTRG.902.2	MSTRG.902	AUR62043434	AUR62043434-RA	Chr00	19570378	19575871	j	NAC domain containing protein 73
AUR62043434-RA	MSTRG.902	AUR62043434	AUR62043434-RA	Chr00	19574734	19575871	=	NAC domain containing protein 73
AUR62043433-RA	MSTRG.903	AUR62043433	AUR62043433-RA	Chr00	19567247	19569178	=	BED zinc finger ;hAT family dimerisation domain
MSTRG.904.1	MSTRG.904	-	-	Chr00	19628423	19628731	u	-
AUR62043436-RA	MSTRG.905	AUR62043436	AUR62043436-RA	Chr00	19617185	19621218	=	-
MSTRG.905.2	MSTRG.905	AUR62043436	AUR62043436-RA	Chr00	19617214	19622585	j	Plant transposase (Ptta/En/Spm family)
MSTRG.906.1	MSTRG.906	-	-	Chr00	19624828	19626524	u	-
MSTRG.906.2	MSTRG.906	-	-	Chr00	19624828	19626524	u	-
AUR62043437-RA	MSTRG.907	AUR62043437	AUR62043437-RA	Chr00	19629125	19636382	=	Protein of unknown function (DUF679)
MSTRG.908.1	MSTRG.908	AUR62043437	AUR62043437-RA	Chr00	19634720	19635951	i	-
MSTRG.909.1	MSTRG.909	-	-	Chr00	19684085	19684518	u	-
MSTRG.910.1	MSTRG.910	-	-	Chr00	19687687	19688200	u	-
MSTRG.911.1	MSTRG.911	-	-	Chr00	19693212	19693545	u	-
MSTRG.912.1	MSTRG.912	AUR62043438	AUR62043438-RA	Chr00	19695771	19696663	x	plasmodesmata callose-binding protein 5
AUR62043438-RA	MSTRG.913	AUR62043438	AUR62043438-RA	Chr00	19696410	19699807	=	plasmodesmata callose-binding protein 5
MSTRG.914.1	MSTRG.914	-	-	Chr00	19713278	19714611	u	-
MSTRG.915.1	MSTRG.915	-	-	Chr00	19707583	19710851	u	-
MSTRG.915.2	MSTRG.915	-	-	Chr00	19708443	19710851	u	-
MSTRG.916.1	MSTRG.916	-	-	Chr00	19709871	19710702	u	-
MSTRG.917.1	MSTRG.917	-	-	Chr00	19717912	19718819	u	-
MSTRG.918.1	MSTRG.918	-	-	Chr00	19738008	19738213	u	-
MSTRG.919.1	MSTRG.919	-	-	Chr00	19739154	19739449	u	-
MSTRG.920.1	MSTRG.920	-	-	Chr00	19747483	19748045	u	-
MSTRG.921.1	MSTRG.921	-	-	Chr00	19748338	19749240	u	-
MSTRG.922.1	MSTRG.922	-	-	Chr00	19756943	19757297	u	-
MSTRG.923.1	MSTRG.923	-	-	Chr00	19802116	19802603	u	-
MSTRG.924.1	MSTRG.924	AUR62043440	AUR62043440-RA	Chr00	19776235	19776518	p	-
MSTRG.925.1	MSTRG.925	-	-	Chr00	19790384	19790849	u	-
MSTRG.926.1	MSTRG.926	-	-	Chr00	19794748	19795482	u	-
MSTRG.927.1	MSTRG.927	-	-	Chr00	19819684	19820028	u	-
MSTRG.928.1	MSTRG.928	-	-	Chr00	19830451	19830776	u	-
MSTRG.929.1	MSTRG.929	-	-	Chr00	19833104	19833455	u	-
MSTRG.930.1	MSTRG.930	-	-	Chr00	19837995	19838343	u	-
MSTRG.931.1	MSTRG.931	-	-	Chr00	19846936	19847264	u	-
MSTRG.932.1	MSTRG.932	AUR62043441	AUR62043441-RA	Chr00	19859128	19859460	p	-
MSTRG.933.1	MSTRG.933	-	-	Chr00	19860535	19861163	u	-
MSTRG.934.1	MSTRG.934	AUR62043441	AUR62043441-RA	Chr00	19855337	19857444	j	TCP family transcription factor 4
AUR62043441-RA	MSTRG.934	AUR62043441	AUR62043441-RA	Chr00	19855958	19857444	=	TCP family transcription factor 4
MSTRG.935.1	MSTRG.935	AUR62043441	AUR62043441-RA	Chr00	19855877	19856293	x	TCP family transcription factor 4
MSTRG.936.1	MSTRG.936	-	-	Chr00	19872587	19873112	u	-
MSTRG.937.1	MSTRG.937	-	-	Chr00	19873370	19873673	u	-
MSTRG.938.1	MSTRG.938	-	-	Chr00	19882416	19882736	u	-
MSTRG.939.1	MSTRG.939	-	-	Chr00	19885396	19885725	u	-
MSTRG.940.1	MSTRG.940	-	-	Chr00	19887389	19888154	u	-
MSTRG.941.1	MSTRG.941	-	-	Chr00	19890392	19890817	u	-
MSTRG.942.1	MSTRG.942	-	-	Chr00	19924767	19925133	u	-
MSTRG.943.1	MSTRG.943	-	-	Chr00	20011208	20011419	u	-
MSTRG.944.1	MSTRG.944	-	-	Chr00	20015568	20016545	u	-
MSTRG.945.1	MSTRG.945	-	-	Chr00	20044592	20044930	u	-
MSTRG.946.1	MSTRG.946	-	-	Chr00	20130044	20130573	u	-
MSTRG.947.1	MSTRG.947	AUR62043935	AUR62043935-RA	Chr00	20034815	20036506	n	-
AUR62043935-RA	MSTRG.947	AUR62043935	AUR62043935-RA	Chr00	20035082	20040442	=	-
MSTRG.948.1	MSTRG.948	-	-	Chr00	20371904	20372250	u	-
AUR62043934-RA	MSTRG.949	AUR62043934	AUR62043934-RA	Chr00	20027323	20033204	=	plastidic GLC translocator
MSTRG.949.2	MSTRG.949	AUR62043934	AUR62043934-RA	Chr00	20027325	20033204	j	plastidic GLC translocator
MSTRG.950.1	MSTRG.950	-	-	Chr00	20374331	20374963	u	-
MSTRG.951.1	MSTRG.951	-	-	Chr00	20377453	20377964	u	-
MSTRG.952.1	MSTRG.952	-	-	Chr00	20389824	20390397	u	-
MSTRG.953.1	MSTRG.953	-	-	Chr00	20404904	20405274	u	-
MSTRG.954.1	MSTRG.954	-	-	Chr00	20384000	20387181	u	-
MSTRG.955.1	MSTRG.955	-	-	Chr00	20384273	20384704	u	-
MSTRG.956.1	MSTRG.956	-	-	Chr00	20405984	20406323	u	-
MSTRG.957.1	MSTRG.957	-	-	Chr00	20407972	20408597	u	-
MSTRG.958.1	MSTRG.958	-	-	Chr00	20590759	20590978	u	-
MSTRG.959.1	MSTRG.959	-	-	Chr00	20770304	20770600	u	-
MSTRG.960.1	MSTRG.960	-	-	Chr00	20787319	20788115	u	-
MSTRG.961.1	MSTRG.961	-	-	Chr00	21247407	21247711	u	-
MSTRG.962.1	MSTRG.962	-	-	Chr00	21292403	21292720	u	-
MSTRG.963.1	MSTRG.963	-	-	Chr00	20777432	20783916	u	VPS35 homolog B
MSTRG.963.2	MSTRG.963	-	-	Chr00	20778507	20783916	u	-
MSTRG.964.1	MSTRG.964	-	-	Chr00	20783425	20784822	u	-
MSTRG.965.1	MSTRG.965	-	-	Chr00	21294062	21294369	u	-
MSTRG.966.1	MSTRG.966	-	-	Chr00	21301541	21302063	u	-
MSTRG.967.1	MSTRG.967	-	-	Chr00	21592325	21592625	u	-
AUR62044451-RA	MSTRG.968	AUR62044451	AUR62044451-RA	Chr00	21378216	21387846	=	DNA topoisomerase, type IA, core
MSTRG.968.2	MSTRG.968	AUR62044451	AUR62044451-RA	Chr00	21379616	21387846	j	DNA topoisomerase, type IA, core
AUR62044449-RA	MSTRG.969	AUR62044449	AUR62044449-RA	Chr00	21609030	21614053	=	unknown protein; Has 35333 Blast hits to 34131 proteins in 2444 species: Archae - 798; Bacteria - 22429; Metazoa - 974; Fungi - 991; Plants - 531; Viruses - 0; Other Eukaryotes - 9610 (source: NCBI BLink).
MSTRG.970.1	MSTRG.970	AUR62044449	AUR62044449-RA	Chr00	21612974	21613216	i	-
MSTRG.971.1	MSTRG.971	-	-	Chr00	21708173	21708535	u	-
MSTRG.972.1	MSTRG.972	-	-	Chr00	21720226	21720552	u	DNA replication helicase, putative
MSTRG.973.1	MSTRG.973	-	-	Chr00	21763056	21763888	u	-
MSTRG.974.1	MSTRG.974	-	-	Chr00	21783439	21784016	u	-
AUR62044450-RA	MSTRG.975	AUR62044450	AUR62044450-RA	Chr00	21614531	21618244	=	P-loop containing nucleoside triphosphate hydrolases superfamily protein
MSTRG.976.1	MSTRG.976	AUR62044450	AUR62044450-RA	Chr00	21614532	21615034	x	-
MSTRG.977.1	MSTRG.977	-	-	Chr00	21839156	21840112	u	-
MSTRG.978.1	MSTRG.978	-	-	Chr00	21846259	21846814	u	-
MSTRG.979.1	MSTRG.979	-	-	Chr00	22003754	22004561	u	-
MSTRG.980.1	MSTRG.980	-	-	Chr00	22030463	22030882	u	-
MSTRG.981.1	MSTRG.981	-	-	Chr00	22119626	22119990	u	-
MSTRG.982.1	MSTRG.982	-	-	Chr00	22164036	22164378	u	-
MSTRG.983.1	MSTRG.983	AUR62044562	AUR62044562-RA	Chr00	22201380	22201597	p	-
MSTRG.984.1	MSTRG.984	-	-	Chr00	22366101	22366790	u	NADH:ubiquinone/plastoquinone oxidoreductase, chain 3 protein
MSTRG.985.1	MSTRG.985	-	-	Chr00	22380118	22380395	u	-
MSTRG.986.1	MSTRG.986	-	-	Chr00	22380563	22380967	u	-
MSTRG.987.1	MSTRG.987	-	-	Chr00	22387232	22387966	u	-
MSTRG.988.1	MSTRG.988	-	-	Chr00	22419281	22419519	u	-
AUR62044562-RA	MSTRG.989	AUR62044562	AUR62044562-RA	Chr00	22202952	22209496	=	4-coumarate:CoA ligase 2
MSTRG.989.2	MSTRG.989	AUR62044562	AUR62044562-RA	Chr00	22203077	22209033	j	4-coumarate:CoA ligase 2
MSTRG.990.1	MSTRG.990	AUR62044147	AUR62044147-RA	Chr00	22454630	22456793	m	Eukaryotic aspartyl protease family protein
AUR62044147-RA	MSTRG.990	AUR62044147	AUR62044147-RA	Chr00	22455169	22456793	=	Eukaryotic aspartyl protease family protein
MSTRG.991.1	MSTRG.991	-	-	Chr00	22460397	22466263	u	histidine triad nucleotide-binding 4
MSTRG.992.1	MSTRG.992	-	-	Chr00	22462746	22462949	u	-
MSTRG.993.1	MSTRG.993	-	-	Chr00	22466341	22467166	u	histidine triad nucleotide-binding 4
MSTRG.994.1	MSTRG.994	-	-	Chr00	22516077	22516894	u	-
AUR62044148-RA	MSTRG.995	AUR62044148	AUR62044148-RA	Chr00	22478273	22490635	=	protein arginine methyltransferase 7
MSTRG.995.2	MSTRG.995	AUR62044148	AUR62044148-RA	Chr00	22487560	22489206	j	protein arginine methyltransferase 7
MSTRG.996.1	MSTRG.996	-	-	Chr00	22713376	22713831	u	-
MSTRG.997.1	MSTRG.997	-	-	Chr00	22975049	22975398	u	-
MSTRG.998.1	MSTRG.998	-	-	Chr00	22976453	22976693	u	-
MSTRG.999.1	MSTRG.999	-	-	Chr00	22991293	22991581	u	-
MSTRG.1000.1	MSTRG.1000	-	-	Chr00	22995365	22995980	u	-
MSTRG.1001.1	MSTRG.1001	-	-	Chr00	23068972	23069455	u	-
MSTRG.1002.1	MSTRG.1002	-	-	Chr00	23212095	23212460	u	-
MSTRG.1003.1	MSTRG.1003	-	-	Chr00	23213801	23214166	u	-
AUR62044051-RA	MSTRG.1004	AUR62044051	AUR62044051-RA	Chr00	23241631	23242807	=	Tetratricopeptide repeat (TPR)-like superfamily protein
MSTRG.1005.1	MSTRG.1005	-	-	Chr00	23243702	23243936	u	-
MSTRG.1006.1	MSTRG.1006	AUR62044296	AUR62044296-RA	Chr00	22540800	22555054	x	-
AUR62044296-RA	MSTRG.1007	AUR62044296	AUR62044296-RA	Chr00	22542624	22544874	=	Transmembrane amino acid transporter family protein
MSTRG.1008.1	MSTRG.1008	AUR62044297	AUR62044297-RA	Chr00	22556557	22556832	p	-
AUR62044297-RA	MSTRG.1009	AUR62044297	AUR62044297-RA	Chr00	22557739	22562028	=	Transmembrane amino acid transporter family protein
MSTRG.1010.1	MSTRG.1010	AUR62044052	AUR62044052-RA	Chr00	23258055	23258400	p	-
MSTRG.1011.1	MSTRG.1011	-	-	Chr00	23245274	23246042	u	FAR1-related sequence 5
AUR62044053-RA	MSTRG.1012	AUR62044053	AUR62044053-RA	Chr00	23260667	23260999	=	-
MSTRG.1013.1	MSTRG.1013	-	-	Chr00	23261081	23261345	u	-
MSTRG.1014.1	MSTRG.1014	-	-	Chr00	23261790	23262018	u	-
MSTRG.1015.1	MSTRG.1015	-	-	Chr00	23315159	23316233	u	-
MSTRG.1016.1	MSTRG.1016	AUR62044054	AUR62044054-RA	Chr00	23266008	23268923	j	Protein of unknown function, DUF538
AUR62044054-RA	MSTRG.1016	AUR62044054	AUR62044054-RA	Chr00	23266158	23268923	=	Protein of unknown function, DUF538
MSTRG.1017.1	MSTRG.1017	-	-	Chr00	23331373	23332045	u	-
MSTRG.1018.1	MSTRG.1018	-	-	Chr00	23412135	23412779	u	-
MSTRG.1019.1	MSTRG.1019	-	-	Chr00	23479874	23480221	u	-
MSTRG.1020.1	MSTRG.1020	-	-	Chr00	23637973	23639787	u	ubiquitin-associated (UBA)/TS-N domain-containing protein
MSTRG.1021.1	MSTRG.1021	-	-	Chr00	23647501	23647958	u	-
MSTRG.1022.1	MSTRG.1022	-	-	Chr00	23889263	23889718	u	-
MSTRG.1023.1	MSTRG.1023	-	-	Chr00	23983088	23983631	u	-
MSTRG.1024.1	MSTRG.1024	-	-	Chr00	23986091	23986644	u	-
MSTRG.1025.1	MSTRG.1025	-	-	Chr00	23987204	23987508	u	-
MSTRG.1026.1	MSTRG.1026	-	-	Chr00	24110033	24110260	u	-
MSTRG.1027.1	MSTRG.1027	-	-	Chr00	23992333	23998580	u	-
MSTRG.1028.1	MSTRG.1028	-	-	Chr00	23992354	23998712	u	-
MSTRG.1029.1	MSTRG.1029	AUR62044679	AUR62044679-RA	Chr00	24169197	24170190	x	-
AUR62044679-RA	MSTRG.1030	AUR62044679	AUR62044679-RA	Chr00	24169946	24170374	=	-
MSTRG.1031.1	MSTRG.1031	-	-	Chr00	24173799	24174359	u	-
MSTRG.1032.1	MSTRG.1032	-	-	Chr00	24737396	24737737	u	-
MSTRG.1033.1	MSTRG.1033	-	-	Chr00	24523098	24523567	u	-
MSTRG.1034.1	MSTRG.1034	-	-	Chr00	24555169	24555611	u	-
MSTRG.1035.1	MSTRG.1035	-	-	Chr00	24762538	24763113	u	-
MSTRG.1036.1	MSTRG.1036	-	-	Chr00	24947824	24953234	u	-
MSTRG.1037.1	MSTRG.1037	-	-	Chr00	25045702	25046206	u	-
AUR62043479-RA	MSTRG.1038	AUR62043479	AUR62043479-RA	Chr00	24924592	24931635	=	PHD finger family protein
MSTRG.1038.2	MSTRG.1038	AUR62043479	AUR62043479-RA	Chr00	24924651	24925971	j	PHD finger family protein
MSTRG.1038.3	MSTRG.1038	AUR62043479	AUR62043479-RA	Chr00	24927100	24930176	j	PHD finger family protein
MSTRG.1038.4	MSTRG.1038	AUR62043479	AUR62043479-RA	Chr00	24930265	24937548	j	RING/FYVE/PHD-type zinc finger family protein
MSTRG.1039.1	MSTRG.1039	AUR62043479	AUR62043479-RA	Chr00	24924785	24925275	x	PHD finger family protein
AUR62043480-RA	MSTRG.1040	AUR62043480	AUR62043480-RA	Chr00	24931661	24934474	=	RNA binding
MSTRG.1040.2	MSTRG.1040	AUR62043480	AUR62043480-RA	Chr00	24931805	24933135	j	RNA binding
MSTRG.1041.1	MSTRG.1041	AUR62043481	AUR62043481-RA	Chr00	24937933	24943772	j	FMN-linked oxidoreductases superfamily protein
MSTRG.1041.2	MSTRG.1041	AUR62043481	AUR62043481-RA	Chr00	24937933	24943772	j	FMN-linked oxidoreductases superfamily protein
AUR62043481-RA	MSTRG.1041	AUR62043481	AUR62043481-RA	Chr00	24938904	24943772	=	FMN-linked oxidoreductases superfamily protein
MSTRG.1042.1	MSTRG.1042	-	-	Chr00	25266065	25266829	u	-
AUR62043850-RA	MSTRG.1043	AUR62043850	AUR62043850-RA	Chr00	25238645	25241568	=	Peroxidase superfamily protein
AUR62043851-RA	MSTRG.1044	AUR62043851	AUR62043851-RA	Chr00	25241017	25245914	=	disease resistance protein (TIR-NBS-LRR class)
MSTRG.1045.1	MSTRG.1045	AUR62043851	AUR62043851-RA	Chr00	25245201	25245481	x	-
MSTRG.1046.1	MSTRG.1046	-	-	Chr00	25247960	25248634	u	-
AUR62043852-RA	MSTRG.1047	AUR62043852	AUR62043852-RA	Chr00	25255285	25258210	=	Peroxidase superfamily protein
AUR62043853-RA	MSTRG.1048	AUR62043853	AUR62043853-RA	Chr00	25257659	25262555	=	disease resistance protein (TIR-NBS-LRR class)
MSTRG.1049.1	MSTRG.1049	-	-	Chr00	25435879	25436152	u	-
MSTRG.1050.1	MSTRG.1050	-	-	Chr00	25448455	25448993	u	-
MSTRG.1051.1	MSTRG.1051	-	-	Chr00	25569760	25570567	u	-
MSTRG.1052.1	MSTRG.1052	-	-	Chr00	25588382	25589441	u	-
MSTRG.1053.1	MSTRG.1053	-	-	Chr00	25591165	25591499	u	-
MSTRG.1054.1	MSTRG.1054	-	-	Chr00	25594205	25594617	u	-
AUR62044083-RA	MSTRG.1055	AUR62044083	AUR62044083-RA	Chr00	25572531	25577800	=	Histone superfamily protein
MSTRG.1055.2	MSTRG.1055	AUR62044083	AUR62044083-RA	Chr00	25572538	25577800	m	Histone superfamily protein
MSTRG.1056.1	MSTRG.1056	-	-	Chr00	25642883	25643178	u	-
MSTRG.1057.1	MSTRG.1057	-	-	Chr00	25659786	25660002	u	-
MSTRG.1058.1	MSTRG.1058	-	-	Chr00	25661285	25661549	u	-
MSTRG.1059.1	MSTRG.1059	-	-	Chr00	25678598	25679536	u	-
MSTRG.1060.1	MSTRG.1060	-	-	Chr00	25742044	25742418	u	-
MSTRG.1061.1	MSTRG.1061	-	-	Chr00	25776111	25776513	u	-
MSTRG.1062.1	MSTRG.1062	-	-	Chr00	25788544	25788926	u	-
MSTRG.1063.1	MSTRG.1063	-	-	Chr00	25848970	25849633	u	-
MSTRG.1064.1	MSTRG.1064	-	-	Chr00	25849182	25849621	u	-
MSTRG.1065.1	MSTRG.1065	-	-	Chr00	25850191	25850843	u	-
MSTRG.1066.1	MSTRG.1066	-	-	Chr00	25852408	25853567	u	-
MSTRG.1067.1	MSTRG.1067	-	-	Chr00	25859319	25859610	u	-
MSTRG.1068.1	MSTRG.1068	-	-	Chr00	25860510	25860779	u	-
MSTRG.1069.1	MSTRG.1069	-	-	Chr00	25876788	25877131	u	-
MSTRG.1070.1	MSTRG.1070	-	-	Chr00	25894381	25894790	u	-
MSTRG.1071.1	MSTRG.1071	AUR62044084	AUR62044084-RA	Chr00	25596626	25603215	n	MEI2-like protein 1
MSTRG.1071.2	MSTRG.1071	AUR62044084	AUR62044084-RA	Chr00	25596626	25603215	n	MEI2-like protein 1
MSTRG.1071.3	MSTRG.1071	AUR62044084	AUR62044084-RA	Chr00	25596890	25603215	j	MEI2-like 4
AUR62044084-RA	MSTRG.1071	AUR62044084	AUR62044084-RA	Chr00	25597052	25603215	=	MEI2-like 4
MSTRG.1071.5	MSTRG.1071	AUR62044084	AUR62044084-RA	Chr00	25597093	25599734	j	MEI2-like 3
MSTRG.1071.6	MSTRG.1071	AUR62044084	AUR62044084-RA	Chr00	25600539	25603215	j	MEI2-like 4
MSTRG.1072.1	MSTRG.1072	AUR62044084	AUR62044084-RA	Chr00	25598591	25599770	x	MEI2-like 3
MSTRG.1073.1	MSTRG.1073	-	-	Chr00	26010192	26010944	u	-
MSTRG.1074.1	MSTRG.1074	-	-	Chr00	26121548	26122050	u	-
MSTRG.1075.1	MSTRG.1075	-	-	Chr00	26137213	26137625	u	-
MSTRG.1076.1	MSTRG.1076	-	-	Chr00	26138741	26139094	u	-
MSTRG.1077.1	MSTRG.1077	-	-	Chr00	26159408	26159871	u	-
MSTRG.1078.1	MSTRG.1078	-	-	Chr00	26179255	26179582	u	-
MSTRG.1079.1	MSTRG.1079	-	-	Chr00	26194753	26199791	u	-
MSTRG.1080.1	MSTRG.1080	-	-	Chr00	26311183	26311443	u	-
MSTRG.1081.1	MSTRG.1081	-	-	Chr00	26320465	26321023	u	-
MSTRG.1082.1	MSTRG.1082	-	-	Chr00	26342031	26342546	u	-
MSTRG.1083.1	MSTRG.1083	-	-	Chr00	26345787	26346322	u	-
MSTRG.1084.1	MSTRG.1084	AUR62044452	AUR62044452-RA	Chr00	25895181	25898517	x	-
MSTRG.1084.2	MSTRG.1084	AUR62044452	AUR62044452-RA	Chr00	25895192	25898517	x	-
MSTRG.1084.3	MSTRG.1084	AUR62044452	AUR62044452-RA	Chr00	25895192	25898517	x	-
MSTRG.1085.1	MSTRG.1085	-	-	Chr00	25895357	25895708	u	-
MSTRG.1086.1	MSTRG.1086	AUR62044452	AUR62044452-RA	Chr00	25896559	25905421	j	-
MSTRG.1086.2	MSTRG.1086	AUR62044452	AUR62044452-RA	Chr00	25897312	25899010	j	-
AUR62044452-RA	MSTRG.1086	AUR62044452	AUR62044452-RA	Chr00	25897710	25905757	=	-
MSTRG.1086.4	MSTRG.1086	AUR62044452	AUR62044452-RA	Chr00	25899011	25905757	j	-
MSTRG.1086.5	MSTRG.1086	AUR62044452	AUR62044452-RA	Chr00	25899011	25905757	j	-
MSTRG.1086.6	MSTRG.1086	AUR62044452	AUR62044452-RA	Chr00	25899136	25905757	j	-
MSTRG.1087.1	MSTRG.1087	AUR62044452	AUR62044452-RA	Chr00	25904840	25905159	x	-
MSTRG.1088.1	MSTRG.1088	-	-	Chr00	26390132	26390483	u	-
MSTRG.1089.1	MSTRG.1089	-	-	Chr00	26350883	26351281	u	-
MSTRG.1090.1	MSTRG.1090	-	-	Chr00	26351393	26361914	u	FAR1-related sequence 5
MSTRG.1090.2	MSTRG.1090	-	-	Chr00	26351511	26354595	u	-
MSTRG.1090.3	MSTRG.1090	-	-	Chr00	26351639	26383917	u	-
MSTRG.1090.4	MSTRG.1090	-	-	Chr00	26351639	26361914	u	FAR1-related sequence 5
MSTRG.1091.1	MSTRG.1091	-	-	Chr00	26354573	26355011	u	-
MSTRG.1092.1	MSTRG.1092	-	-	Chr00	26355400	26356987	u	-
MSTRG.1093.1	MSTRG.1093	-	-	Chr00	26362166	26362476	u	-
MSTRG.1094.1	MSTRG.1094	-	-	Chr00	26449905	26450387	u	-
MSTRG.1095.1	MSTRG.1095	-	-	Chr00	26450543	26451157	u	-
MSTRG.1096.1	MSTRG.1096	-	-	Chr00	26492874	26493082	u	-
MSTRG.1097.1	MSTRG.1097	-	-	Chr00	26506434	26506763	u	-
MSTRG.1098.1	MSTRG.1098	-	-	Chr00	26507012	26508181	u	-
MSTRG.1099.1	MSTRG.1099	-	-	Chr00	26518385	26518748	u	-
MSTRG.1100.1	MSTRG.1100	-	-	Chr00	26528651	26529019	u	-
MSTRG.1101.1	MSTRG.1101	-	-	Chr00	26529236	26529581	u	-
MSTRG.1102.1	MSTRG.1102	-	-	Chr00	26534182	26534514	u	-
MSTRG.1103.1	MSTRG.1103	-	-	Chr00	26538222	26539241	u	-
MSTRG.1104.1	MSTRG.1104	-	-	Chr00	26551595	26552281	u	-
MSTRG.1105.1	MSTRG.1105	-	-	Chr00	26556435	26556657	u	-
MSTRG.1106.1	MSTRG.1106	-	-	Chr00	26600357	26600789	u	-
MSTRG.1107.1	MSTRG.1107	-	-	Chr00	26602425	26602821	u	-
MSTRG.1108.1	MSTRG.1108	-	-	Chr00	26585904	26589112	u	-
MSTRG.1108.2	MSTRG.1108	-	-	Chr00	26585904	26589112	u	-
MSTRG.1108.3	MSTRG.1108	-	-	Chr00	26585994	26589112	u	-
MSTRG.1109.1	MSTRG.1109	-	-	Chr00	26612324	26612658	u	-
MSTRG.1110.1	MSTRG.1110	-	-	Chr00	26603974	26604221	u	-
MSTRG.1111.1	MSTRG.1111	-	-	Chr00	26623188	26623465	u	-
MSTRG.1112.1	MSTRG.1112	-	-	Chr00	26624859	26625883	u	-
MSTRG.1113.1	MSTRG.1113	-	-	Chr00	26635943	26636261	u	-
MSTRG.1114.1	MSTRG.1114	-	-	Chr00	26636838	26637532	u	-
MSTRG.1115.1	MSTRG.1115	-	-	Chr00	26646680	26646976	u	-
MSTRG.1116.1	MSTRG.1116	-	-	Chr00	26680610	26680929	u	-
MSTRG.1117.1	MSTRG.1117	-	-	Chr00	26736896	26737184	u	-
MSTRG.1118.1	MSTRG.1118	-	-	Chr00	26738215	26738825	u	-
MSTRG.1119.1	MSTRG.1119	-	-	Chr00	26766688	26767030	u	-
MSTRG.1120.1	MSTRG.1120	AUR62043498	AUR62043498-RA	Chr00	26403892	26442364	j	embryo defective 3012
MSTRG.1120.2	MSTRG.1120	AUR62043498	AUR62043498-RA	Chr00	26404006	26436634	j	embryo defective 3012
MSTRG.1120.3	MSTRG.1120	AUR62043498	AUR62043498-RA	Chr00	26404006	26436593	j	embryo defective 3012
AUR62043498-RA	MSTRG.1120	AUR62043498	AUR62043498-RA	Chr00	26404168	26436634	=	embryo defective 3012
MSTRG.1121.1	MSTRG.1121	AUR62043498	AUR62043498-RA	Chr00	26415141	26415460	x	-
MSTRG.1122.1	MSTRG.1122	AUR62043498	AUR62043498-RA	Chr00	26423105	26423426	i	-
MSTRG.1123.1	MSTRG.1123	AUR62043498	AUR62043498-RA	Chr00	26424060	26424634	x	-
MSTRG.1124.1	MSTRG.1124	AUR62043498	AUR62043498-RA	Chr00	26436144	26438956	x	embryo defective 3012
MSTRG.1125.1	MSTRG.1125	-	-	Chr00	26787621	26787987	u	-
MSTRG.1126.1	MSTRG.1126	-	-	Chr00	26778672	26778930	u	-
MSTRG.1127.1	MSTRG.1127	-	-	Chr00	26779125	26779804	u	-
MSTRG.1128.1	MSTRG.1128	-	-	Chr00	26792445	26792780	u	-
MSTRG.1129.1	MSTRG.1129	-	-	Chr00	26811747	26812167	u	-
MSTRG.1130.1	MSTRG.1130	-	-	Chr00	26791288	26791816	u	-
MSTRG.1131.1	MSTRG.1131	-	-	Chr00	26772034	26772377	u	-
MSTRG.1132.1	MSTRG.1132	-	-	Chr00	26756195	26760014	u	-
MSTRG.1133.1	MSTRG.1133	-	-	Chr00	26823114	26823495	u	-
MSTRG.1134.1	MSTRG.1134	-	-	Chr00	26837887	26838274	u	-
MSTRG.1135.1	MSTRG.1135	-	-	Chr00	26999160	26999408	u	unknown protein; BEST Arabidopsis thaliana protein match is: unknown protein (TAIR:AT5G57123.1); Has 30201 Blast hits to 17322 proteins in 780 species: Archae - 12; Bacteria - 1396; Metazoa - 17338; Fungi - 3422; Plants - 5037; Viruses - 0; Other Eukaryotes - 2996 (source: NCBI BLink).
AUR62044014-RA	MSTRG.1136	AUR62044014	AUR62044014-RA	Chr00	26951682	26962549	=	myosin, putative
MSTRG.1137.1	MSTRG.1137	AUR62044014	AUR62044014-RA	Chr00	26953000	26953368	i	-
MSTRG.1138.1	MSTRG.1138	AUR62044014	AUR62044014-RA	Chr00	26961609	26962548	x	-
MSTRG.1139.1	MSTRG.1139	AUR62044015	AUR62044015-RA	Chr00	26963991	26966306	o	unknown protein; FUNCTIONS IN: molecular_function unknown; INVOLVED IN: biological_process unknown; LOCATED IN: vacuole; BEST Arabidopsis thaliana protein match is: unknown protein (TAIR:AT5G21940.1); Has 215 Blast hits to 215 proteins in 19 species: Archae - 0; Bacteria - 0; Metazoa - 0; Fungi - 0; Plants - 213; Viruses - 0; Other Eukaryotes - 2 (source: NCBI BLink).
AUR62044015-RA	MSTRG.1139	AUR62044015	AUR62044015-RA	Chr00	26964246	26966306	=	-
AUR62044021-RA	MSTRG.1140	AUR62044021	AUR62044021-RA	Chr00	27049894	27056761	=	essential meiotic endonuclease 1B
MSTRG.1140.2	MSTRG.1140	AUR62044021	AUR62044021-RA	Chr00	27051188	27056183	j	essential meiotic endonuclease 1B
MSTRG.1140.3	MSTRG.1140	AUR62044022	AUR62044022-RA	Chr00	27056447	27060044	k	-
AUR62044022-RA	MSTRG.1140	AUR62044022	AUR62044022-RA	Chr00	27057883	27060044	=	-
MSTRG.1141.1	MSTRG.1141	-	-	Chr00	27060538	27064615	u	Small nuclear ribonucleoprotein family protein
MSTRG.1142.1	MSTRG.1142	-	-	Chr00	27062389	27062681	u	-
MSTRG.1143.1	MSTRG.1143	-	-	Chr00	27082373	27084737	u	-
MSTRG.1144.1	MSTRG.1144	-	-	Chr00	27089358	27089656	u	-
MSTRG.1145.1	MSTRG.1145	-	-	Chr00	27347069	27347299	u	-
MSTRG.1146.1	MSTRG.1146	-	-	Chr00	27347624	27347858	u	-
MSTRG.1147.1	MSTRG.1147	-	-	Chr00	27349755	27350092	u	-
MSTRG.1148.1	MSTRG.1148	-	-	Chr00	27526397	27526701	u	-
AUR62044023-RA	MSTRG.1149	AUR62044023	AUR62044023-RA	Chr00	27072554	27079695	=	ubiquitin-specific protease 27
MSTRG.1149.2	MSTRG.1149	AUR62044023	AUR62044023-RA	Chr00	27072784	27074847	j	ubiquitin-specific protease 27
MSTRG.1149.3	MSTRG.1149	AUR62044023	AUR62044023-RA	Chr00	27073033	27074560	n	ubiquitin-specific protease 27
MSTRG.1150.1	MSTRG.1150	AUR62044023	AUR62044023-RA	Chr00	27072687	27073087	x	ubiquitin-specific protease 27
MSTRG.1151.1	MSTRG.1151	AUR62043579	AUR62043579-RA	Chr00	27655391	27663216	j	unknown protein; INVOLVED IN: biological_process unknown; LOCATED IN: plasma membrane; EXPRESSED IN: 22 plant structures; EXPRESSED DURING: 13 growth stages; Has 30201 Blast hits to 17322 proteins in 780 species: Archae - 12; Bacteria - 1396; Metazoa - 17338; Fungi - 3422; Plants - 5037; Viruses - 0; Other Eukaryotes - 2996 (source: NCBI BLink).
AUR62043579-RA	MSTRG.1151	AUR62043579	AUR62043579-RA	Chr00	27655391	27658652	=	unknown protein; INVOLVED IN: biological_process unknown; LOCATED IN: plasma membrane; EXPRESSED IN: 22 plant structures; EXPRESSED DURING: 13 growth stages; Has 30201 Blast hits to 17322 proteins in 780 species: Archae - 12; Bacteria - 1396; Metazoa - 17338; Fungi - 3422; Plants - 5037; Viruses - 0; Other Eukaryotes - 2996 (source: NCBI BLink).
MSTRG.1151.3	MSTRG.1151	AUR62043579	AUR62043579-RA	Chr00	27655654	27658652	j	unknown protein; INVOLVED IN: biological_process unknown; LOCATED IN: plasma membrane; EXPRESSED IN: 22 plant structures; EXPRESSED DURING: 13 growth stages; Has 30201 Blast hits to 17322 proteins in 780 species: Archae - 12; Bacteria - 1396; Metazoa - 17338; Fungi - 3422; Plants - 5037; Viruses - 0; Other Eukaryotes - 2996 (source: NCBI BLink).
MSTRG.1152.1	MSTRG.1152	-	-	Chr00	27659491	27659737	u	-
MSTRG.1153.1	MSTRG.1153	-	-	Chr00	27662784	27663123	u	-
MSTRG.1154.1	MSTRG.1154	AUR62043580	AUR62043580-RA	Chr00	27671585	27672310	x	Histone superfamily protein
AUR62043580-RA	MSTRG.1155	AUR62043580	AUR62043580-RA	Chr00	27671644	27672054	=	Histone superfamily protein
AUR62043581-RA	MSTRG.1156	AUR62043581	AUR62043581-RA	Chr00	27672540	27680078	=	Transducin/WD40 repeat-like superfamily protein
MSTRG.1156.2	MSTRG.1156	AUR62043581	AUR62043581-RA	Chr00	27674495	27675409	j	Transducin/WD40 repeat-like superfamily protein
MSTRG.1157.1	MSTRG.1157	-	-	Chr00	27806311	27806630	u	-
MSTRG.1158.1	MSTRG.1158	-	-	Chr00	28032819	28033172	u	-
MSTRG.1159.1	MSTRG.1159	-	-	Chr00	28058167	28058555	u	-
MSTRG.1160.1	MSTRG.1160	-	-	Chr00	28059235	28059650	u	-
MSTRG.1161.1	MSTRG.1161	-	-	Chr00	28060032	28060842	u	-
MSTRG.1162.1	MSTRG.1162	AUR62043582	AUR62043582-RA	Chr00	27685070	27688332	j	basic helix-loop-helix (bHLH) DNA-binding superfamily protein
AUR62043582-RA	MSTRG.1162	AUR62043582	AUR62043582-RA	Chr00	27685189	27687093	=	basic helix-loop-helix (bHLH) DNA-binding superfamily protein
MSTRG.1163.1	MSTRG.1163	AUR62043582	AUR62043582-RA	Chr00	27685197	27685618	x	-
MSTRG.1164.1	MSTRG.1164	-	-	Chr00	27687314	27687671	u	-
MSTRG.1165.1	MSTRG.1165	AUR62043173	AUR62043173-RA	Chr00	28065636	28065960	p	-
AUR62043172-RA	MSTRG.1166	AUR62043172	AUR62043172-RA	Chr00	28062940	28064934	=	beta-1,3-glucanase 3
MSTRG.1167.1	MSTRG.1167	-	-	Chr00	28072810	28073295	u	-
AUR62043173-RA	MSTRG.1168	AUR62043173	AUR62043173-RA	Chr00	28066741	28069959	=	Pentatricopeptide repeat (PPR-like) superfamily protein
MSTRG.1169.1	MSTRG.1169	-	-	Chr00	28077524	28077890	u	-
AUR62043174-RA	MSTRG.1170	AUR62043174	AUR62043174-RA	Chr00	28078421	28080069	=	Calcium-dependent lipid-binding (CaLB domain) family protein
AUR62043175-RA	MSTRG.1171	AUR62043175	AUR62043175-RA	Chr00	28081152	28094084	=	FUNCTIONS IN: molecular_function unknown; INVOLVED IN: ribosome biogenesis; LOCATED IN: nucleus; EXPRESSED IN: 22 plant structures; EXPRESSED DURING: 13 growth stages; CONTAINS InterPro DOMAIN/s: AARP2CN (InterPro:IPR012948), Protein of unknown function DUF663 (InterPro:IPR007034); BEST Arabidopsis thaliana protein match is: P-loop containing nucleoside triphosphate hydrolases superfamily protein…
MSTRG.1171.2	MSTRG.1171	AUR62043175	AUR62043175-RA	Chr00	28081193	28094084	j	FUNCTIONS IN: molecular_function unknown; INVOLVED IN: ribosome biogenesis; LOCATED IN: nucleus; EXPRESSED IN: 22 plant structures; EXPRESSED DURING: 13 growth stages; CONTAINS InterPro DOMAIN/s: AARP2CN (InterPro:IPR012948), Protein of unknown function DUF663 (InterPro:IPR007034); BEST Arabidopsis thaliana protein match is: P-loop containing nucleoside triphosphate hydrolases superfamily protein…
MSTRG.1172.1	MSTRG.1172	-	-	Chr00	28387364	28387621	u	-
MSTRG.1173.1	MSTRG.1173	-	-	Chr00	28155911	28156198	u	-
MSTRG.1174.1	MSTRG.1174	-	-	Chr00	28163768	28164240	u	-
MSTRG.1175.1	MSTRG.1175	-	-	Chr00	28531827	28532028	u	-
MSTRG.1176.1	MSTRG.1176	-	-	Chr00	28538767	28539412	u	-
MSTRG.1177.1	MSTRG.1177	-	-	Chr00	28582684	28583051	u	-
MSTRG.1178.1	MSTRG.1178	-	-	Chr00	28652256	28652629	u	-
MSTRG.1179.1	MSTRG.1179	-	-	Chr00	28642694	28643202	u	-
MSTRG.1180.1	MSTRG.1180	-	-	Chr00	28653962	28654380	u	-
MSTRG.1181.1	MSTRG.1181	-	-	Chr00	28674048	28674417	u	-
MSTRG.1182.1	MSTRG.1182	-	-	Chr00	28682644	28682931	u	-
MSTRG.1183.1	MSTRG.1183	AUR62043177	AUR62043177-RA	Chr00	28094593	28108956	x	-
AUR62043176-RA	MSTRG.1184	AUR62043176	AUR62043176-RA	Chr00	28100617	28101407	=	RmlC-like cupins superfamily protein
MSTRG.1185.1	MSTRG.1185	AUR62043177	AUR62043177-RA	Chr00	28108295	28137063	k	Tetratricopeptide repeat (TPR)-like superfamily protein
MSTRG.1185.2	MSTRG.1185	AUR62043177	AUR62043177-RA	Chr00	28108551	28137063	j	Tetratricopeptide repeat (TPR)-like superfamily protein
AUR62043177-RA	MSTRG.1185	AUR62043177	AUR62043177-RA	Chr00	28108553	28136490	=	Tetratricopeptide repeat (TPR)-like superfamily protein
AUR62044513-RA	MSTRG.1186	AUR62044513	AUR62044513-RA	Chr00	28812597	28817728	=	-
MSTRG.1187.1	MSTRG.1187	AUR62044513	AUR62044513-RA	Chr00	28813848	28814074	i	-
MSTRG.1188.1	MSTRG.1188	-	-	Chr00	28818081	28818440	u	-
MSTRG.1189.1	MSTRG.1189	-	-	Chr00	28895501	28895955	u	-
MSTRG.1190.1	MSTRG.1190	-	-	Chr00	28833938	28834218	u	-
MSTRG.1191.1	MSTRG.1191	-	-	Chr00	28897598	28898131	u	-
MSTRG.1192.1	MSTRG.1192	-	-	Chr00	29029791	29030055	u	-
MSTRG.1193.1	MSTRG.1193	-	-	Chr00	29154375	29154747	u	-
MSTRG.1194.1	MSTRG.1194	-	-	Chr00	29163123	29163362	u	-
MSTRG.1195.1	MSTRG.1195	-	-	Chr00	29270309	29270548	u	-
MSTRG.1196.1	MSTRG.1196	-	-	Chr00	29428312	29428648	u	-
MSTRG.1197.1	MSTRG.1197	-	-	Chr00	29442294	29442635	u	-
MSTRG.1198.1	MSTRG.1198	-	-	Chr00	29400985	29413219	u	-
MSTRG.1199.1	MSTRG.1199	-	-	Chr00	29401205	29407092	u	-
MSTRG.1200.1	MSTRG.1200	-	-	Chr00	29406123	29412956	u	-
MSTRG.1201.1	MSTRG.1201	-	-	Chr00	29443706	29444009	u	-
MSTRG.1202.1	MSTRG.1202	-	-	Chr00	29468514	29468863	u	-
MSTRG.1203.1	MSTRG.1203	-	-	Chr00	29479826	29486703	u	-
MSTRG.1204.1	MSTRG.1204	-	-	Chr00	29489578	29490083	u	-
MSTRG.1205.1	MSTRG.1205	-	-	Chr00	29508511	29509385	u	-
MSTRG.1206.1	MSTRG.1206	-	-	Chr00	29510094	29510346	u	-
MSTRG.1207.1	MSTRG.1207	-	-	Chr00	29516647	29516897	u	-
MSTRG.1208.1	MSTRG.1208	-	-	Chr00	29519889	29520189	u	-
MSTRG.1209.1	MSTRG.1209	-	-	Chr00	29525528	29525885	u	-
MSTRG.1210.1	MSTRG.1210	-	-	Chr00	29525914	29526320	u	-
MSTRG.1211.1	MSTRG.1211	-	-	Chr00	29543307	29543680	u	-
MSTRG.1212.1	MSTRG.1212	-	-	Chr00	29568026	29568389	u	-
MSTRG.1213.1	MSTRG.1213	-	-	Chr00	29577191	29577531	u	-
MSTRG.1214.1	MSTRG.1214	-	-	Chr00	29644958	29645292	u	-
MSTRG.1215.1	MSTRG.1215	-	-	Chr00	29674689	29674921	u	-
MSTRG.1216.1	MSTRG.1216	-	-	Chr00	29675489	29676942	u	-
MSTRG.1217.1	MSTRG.1217	-	-	Chr00	29679175	29679490	u	-
MSTRG.1218.1	MSTRG.1218	-	-	Chr00	29682088	29682702	u	-
MSTRG.1219.1	MSTRG.1219	-	-	Chr00	29683636	29684343	u	-
MSTRG.1220.1	MSTRG.1220	-	-	Chr00	29687686	29688070	u	-
MSTRG.1221.1	MSTRG.1221	-	-	Chr00	29690972	29691512	u	-
MSTRG.1222.1	MSTRG.1222	-	-	Chr00	29743587	29743806	u	-
MSTRG.1223.1	MSTRG.1223	-	-	Chr00	29772014	29772305	u	-
MSTRG.1224.1	MSTRG.1224	-	-	Chr00	29808113	29808663	u	-
MSTRG.1225.1	MSTRG.1225	-	-	Chr00	29815076	29815744	u	-
MSTRG.1226.1	MSTRG.1226	-	-	Chr00	29764657	29766683	u	-
MSTRG.1226.2	MSTRG.1226	-	-	Chr00	29764659	29770272	u	-
MSTRG.1226.3	MSTRG.1226	-	-	Chr00	29764661	29766683	u	-
MSTRG.1227.1	MSTRG.1227	-	-	Chr00	29764659	29765241	u	-
MSTRG.1228.1	MSTRG.1228	-	-	Chr00	29818280	29818749	u	-
MSTRG.1229.1	MSTRG.1229	-	-	Chr00	29822530	29823192	u	-
MSTRG.1230.1	MSTRG.1230	-	-	Chr00	29824106	29824758	u	-
MSTRG.1231.1	MSTRG.1231	-	-	Chr00	29828726	29829638	u	-
AUR62043875-RA	MSTRG.1232	AUR62043875	AUR62043875-RA	Chr00	29819571	29821430	=	ribosomal protein 5B
MSTRG.1232.2	MSTRG.1232	AUR62043875	AUR62043875-RA	Chr00	29819642	29821430	j	ribosomal protein 5B
MSTRG.1232.3	MSTRG.1232	AUR62043875	AUR62043875-RA	Chr00	29819642	29821430	j	ribosomal protein 5B
MSTRG.1232.4	MSTRG.1232	AUR62043875	AUR62043875-RA	Chr00	29819906	29821430	j	ribosomal protein 5B
MSTRG.1232.5	MSTRG.1232	AUR62043875	AUR62043875-RA	Chr00	29819912	29821430	j	ribosomal protein 5B
MSTRG.1233.1	MSTRG.1233	-	-	Chr00	29838709	29838978	u	-
MSTRG.1234.1	MSTRG.1234	-	-	Chr00	29840131	29840382	u	-
MSTRG.1235.1	MSTRG.1235	-	-	Chr00	29835333	29838141	u	-
MSTRG.1236.1	MSTRG.1236	-	-	Chr00	29847965	29848172	u	-
MSTRG.1237.1	MSTRG.1237	-	-	Chr00	29859655	29860420	u	-
MSTRG.1238.1	MSTRG.1238	-	-	Chr00	29861085	29861764	u	-
MSTRG.1239.1	MSTRG.1239	-	-	Chr00	29866316	29866894	u	-
MSTRG.1240.1	MSTRG.1240	-	-	Chr00	29867503	29867785	u	-
MSTRG.1241.1	MSTRG.1241	-	-	Chr00	29886190	29886558	u	-
MSTRG.1242.1	MSTRG.1242	-	-	Chr00	29895588	29895793	u	-
MSTRG.1243.1	MSTRG.1243	-	-	Chr00	29901735	29902030	u	-
MSTRG.1244.1	MSTRG.1244	-	-	Chr00	29916746	29917294	u	-
MSTRG.1245.1	MSTRG.1245	-	-	Chr00	29925048	29925418	u	-
AUR62044116-RA	MSTRG.1246	AUR62044116	AUR62044116-RA	Chr00	30008298	30009722	=	-
MSTRG.1247.1	MSTRG.1247	AUR62044116	AUR62044116-RA	Chr00	30008320	30008558	x	-
MSTRG.1248.1	MSTRG.1248	AUR62044116	AUR62044116-RA	Chr00	30009325	30009675	x	-
MSTRG.1249.1	MSTRG.1249	-	-	Chr00	30093813	30094176	u	-
MSTRG.1250.1	MSTRG.1250	-	-	Chr00	30189684	30189943	u	-
MSTRG.1251.1	MSTRG.1251	AUR62043876	AUR62043876-RA	Chr00	29929222	29941681	j	nucleic acid binding;RNA binding
MSTRG.1251.2	MSTRG.1251	AUR62043876	AUR62043876-RA	Chr00	29929222	29941681	j	nucleic acid binding;RNA binding
MSTRG.1251.3	MSTRG.1251	AUR62043876	AUR62043876-RA	Chr00	29929853	29941681	j	nucleic acid binding;RNA binding
AUR62043876-RA	MSTRG.1251	AUR62043876	AUR62043876-RA	Chr00	29929938	29940846	=	nucleic acid binding;RNA binding
AUR62043877-RA	MSTRG.1252	AUR62043877	AUR62043877-RA	Chr00	29941440	29954500	=	-
MSTRG.1253.1	MSTRG.1253	AUR62043877	AUR62043877-RA	Chr00	29947951	29948290	i	-
MSTRG.1254.1	MSTRG.1254	AUR62043877	AUR62043877-RA	Chr00	29948498	29948725	i	-
AUR62044118-RA	MSTRG.1255	AUR62044118	AUR62044118-RA	Chr00	30024794	30029364	=	transducin family protein / WD-40 repeat family protein
MSTRG.1256.1	MSTRG.1256	AUR62044174	AUR62044174-RA	Chr00	30216177	30216859	x	sterol carrier protein 2
AUR62044174-RA	MSTRG.1257	AUR62044174	AUR62044174-RA	Chr00	30216728	30217353	=	sterol carrier protein 2
MSTRG.1258.1	MSTRG.1258	AUR62044176	AUR62044176-RA	Chr00	30229987	30231216	x	plant U-box 8
AUR62044176-RA	MSTRG.1259	AUR62044176	AUR62044176-RA	Chr00	30230104	30231216	=	plant U-box 8
MSTRG.1260.1	MSTRG.1260	-	-	Chr00	30237441	30237649	u	-
MSTRG.1261.1	MSTRG.1261	-	-	Chr00	30250099	30250536	u	-
MSTRG.1262.1	MSTRG.1262	-	-	Chr00	30219492	30220211	u	-
AUR62044175-RA	MSTRG.1263	AUR62044175	AUR62044175-RA	Chr00	30221626	30226250	=	S-locus lectin protein kinase family protein
MSTRG.1263.2	MSTRG.1263	AUR62044175	AUR62044175-RA	Chr00	30224609	30226250	m	S-locus lectin protein kinase family protein
MSTRG.1264.1	MSTRG.1264	AUR62044175	AUR62044175-RA	Chr00	30223177	30223789	i	-
MSTRG.1265.1	MSTRG.1265	-	-	Chr00	30270926	30271315	u	-
MSTRG.1266.1	MSTRG.1266	-	-	Chr00	30329428	30329862	u	-
MSTRG.1267.1	MSTRG.1267	-	-	Chr00	30350276	30350733	u	-
MSTRG.1268.1	MSTRG.1268	-	-	Chr00	30350937	30351218	u	-
MSTRG.1269.1	MSTRG.1269	-	-	Chr00	30376229	30377345	u	-
MSTRG.1270.1	MSTRG.1270	-	-	Chr00	30378654	30379034	u	-
MSTRG.1271.1	MSTRG.1271	-	-	Chr00	30395765	30396011	u	-
MSTRG.1272.1	MSTRG.1272	-	-	Chr00	30396642	30397360	u	-
MSTRG.1273.1	MSTRG.1273	-	-	Chr00	30410979	30411277	u	-
MSTRG.1274.1	MSTRG.1274	-	-	Chr00	30413145	30413581	u	-
MSTRG.1275.1	MSTRG.1275	-	-	Chr00	30416151	30416857	u	-
MSTRG.1276.1	MSTRG.1276	-	-	Chr00	30417166	30417590	u	-
MSTRG.1277.1	MSTRG.1277	-	-	Chr00	30423752	30424107	u	-
MSTRG.1278.1	MSTRG.1278	-	-	Chr00	30426954	30427279	u	-
MSTRG.1279.1	MSTRG.1279	-	-	Chr00	30436131	30436447	u	-
MSTRG.1280.1	MSTRG.1280	-	-	Chr00	30538281	30539231	u	-
MSTRG.1281.1	MSTRG.1281	-	-	Chr00	30542953	30543321	u	-
MSTRG.1282.1	MSTRG.1282	-	-	Chr00	30544812	30545338	u	-
MSTRG.1283.1	MSTRG.1283	-	-	Chr00	30629163	30629523	u	-
MSTRG.1284.1	MSTRG.1284	-	-	Chr00	30631075	30631498	u	-
MSTRG.1285.1	MSTRG.1285	-	-	Chr00	30632875	30633178	u	-
MSTRG.1286.1	MSTRG.1286	-	-	Chr00	30780999	30781358	u	-
MSTRG.1287.1	MSTRG.1287	-	-	Chr00	30884558	30887646	u	tetratricopetide-repeat thioredoxin-like 1
MSTRG.1288.1	MSTRG.1288	-	-	Chr00	30885135	30885435	u	-
MSTRG.1289.1	MSTRG.1289	-	-	Chr00	30951274	30951583	u	-
MSTRG.1290.1	MSTRG.1290	-	-	Chr00	30901115	30902036	u	-
MSTRG.1291.1	MSTRG.1291	-	-	Chr00	30955645	30955906	u	-
MSTRG.1292.1	MSTRG.1292	-	-	Chr00	30957310	30957682	u	-
MSTRG.1293.1	MSTRG.1293	-	-	Chr00	30962582	30962829	u	-
MSTRG.1294.1	MSTRG.1294	-	-	Chr00	30969985	30970551	u	-
MSTRG.1295.1	MSTRG.1295	-	-	Chr00	30975629	30976198	u	-
MSTRG.1296.1	MSTRG.1296	-	-	Chr00	30993563	30994437	u	-
MSTRG.1297.1	MSTRG.1297	-	-	Chr00	30995039	30995479	u	-
AUR62044614-RA	MSTRG.1298	AUR62044614	AUR62044614-RA	Chr00	30977902	30981667	=	-
MSTRG.1298.2	MSTRG.1298	AUR62044614	AUR62044614-RA	Chr00	30980177	30981667	j	-
MSTRG.1299.1	MSTRG.1299	AUR62044614	AUR62044614-RA	Chr00	30981357	30981668	x	-
MSTRG.1300.1	MSTRG.1300	-	-	Chr00	31007645	31008370	u	-
MSTRG.1301.1	MSTRG.1301	-	-	Chr00	30995696	30996743	u	-
MSTRG.1302.1	MSTRG.1302	-	-	Chr00	31011444	31011767	u	-
MSTRG.1303.1	MSTRG.1303	-	-	Chr00	31205047	31205588	u	-
MSTRG.1304.1	MSTRG.1304	-	-	Chr00	31187378	31188627	u	-
MSTRG.1305.1	MSTRG.1305	AUR62044218	AUR62044218-RA	Chr00	31187378	31188627	p	-
MSTRG.1306.1	MSTRG.1306	-	-	Chr00	31207878	31208419	u	-
MSTRG.1307.1	MSTRG.1307	AUR62044218	AUR62044218-RA	Chr00	31177987	31178557	x	carotenoid cleavage dioxygenase 1
AUR62044218-RA	MSTRG.1308	AUR62044218	AUR62044218-RA	Chr00	31178088	31185484	=	carotenoid cleavage dioxygenase 1
MSTRG.1308.2	MSTRG.1308	AUR62044218	AUR62044218-RA	Chr00	31184395	31186096	j	carotenoid cleavage dioxygenase 1
MSTRG.1308.3	MSTRG.1308	AUR62044218	AUR62044218-RA	Chr00	31184472	31184961	j	carotenoid cleavage dioxygenase 1
MSTRG.1309.1	MSTRG.1309	AUR62044218	AUR62044218-RA	Chr00	31180458	31181137	i	-
MSTRG.1310.1	MSTRG.1310	-	-	Chr00	31295546	31299583	u	Cytochrome c oxidase biogenesis protein Cmc1-like
MSTRG.1310.2	MSTRG.1310	-	-	Chr00	31295708	31299583	u	Cytochrome c oxidase biogenesis protein Cmc1-like
MSTRG.1311.1	MSTRG.1311	AUR62044490	AUR62044490-RA	Chr00	31281661	31288524	k	general regulatory factor 7
AUR62044490-RA	MSTRG.1311	AUR62044490	AUR62044490-RA	Chr00	31281661	31287399	=	general regulatory factor 7
MSTRG.1311.3	MSTRG.1311	AUR62044490	AUR62044490-RA	Chr00	31284497	31288524	j	general regulatory factor 7
MSTRG.1311.4	MSTRG.1311	AUR62044490	AUR62044490-RA	Chr00	31284498	31288524	j	general regulatory factor 7
MSTRG.1311.5	MSTRG.1311	AUR62044490	AUR62044490-RA	Chr00	31284788	31288524	j	general regulatory factor 7
MSTRG.1311.6	MSTRG.1311	AUR62044490	AUR62044490-RA	Chr00	31284788	31287741	j	general regulatory factor 7
MSTRG.1311.7	MSTRG.1311	AUR62044490	AUR62044490-RA	Chr00	31284788	31287741	j	general regulatory factor 7
MSTRG.1312.1	MSTRG.1312	AUR62044490	AUR62044490-RA	Chr00	31286915	31287503	x	general regulatory factor 7
AUR62043932-RA	MSTRG.1313	AUR62043932	AUR62043932-RA	Chr00	31311728	31315733	=	N-MYC downregulated-like 1
MSTRG.1314.1	MSTRG.1314	-	-	Chr00	31334132	31335064	u	-
AUR62043933-RA	MSTRG.1315	AUR62043933	AUR62043933-RA	Chr00	31326353	31331232	=	unknown protein; Has 37 Blast hits to 37 proteins in 12 species: Archae - 0; Bacteria - 0; Metazoa - 0; Fungi - 3; Plants - 34; Viruses - 0; Other Eukaryotes - 0 (source: NCBI BLink).
MSTRG.1315.2	MSTRG.1315	AUR62043933	AUR62043933-RA	Chr00	31326501	31328187	n	unknown protein; Has 37 Blast hits to 37 proteins in 12 species: Archae - 0; Bacteria - 0; Metazoa - 0; Fungi - 3; Plants - 34; Viruses - 0; Other Eukaryotes - 0 (source: NCBI BLink).
AUR62044294-RA	MSTRG.1316	AUR62044294	AUR62044294-RA	Chr00	31447725	31452040	=	carotenoid cleavage dioxygenase 8
MSTRG.1316.2	MSTRG.1316	AUR62044294	AUR62044294-RA	Chr00	31447843	31453087	j	carotenoid cleavage dioxygenase 8
MSTRG.1317.1	MSTRG.1317	-	-	Chr00	31481233	31481836	u	-
MSTRG.1318.1	MSTRG.1318	-	-	Chr00	31583529	31583869	u	-
MSTRG.1319.1	MSTRG.1319	-	-	Chr00	31608996	31609278	u	-
MSTRG.1320.1	MSTRG.1320	-	-	Chr00	31651030	31651461	u	-
MSTRG.1321.1	MSTRG.1321	AUR62044295	AUR62044295-RA	Chr00	31453773	31456575	j	-
MSTRG.1321.2	MSTRG.1321	AUR62044295	AUR62044295-RA	Chr00	31453828	31456575	j	CONTAINS InterPro DOMAIN/s: Putative harbinger transposase-derived nuclease (InterPro:IPR006912); BEST Arabidopsis thaliana protein match is: unknown protein (TAIR:AT1G43722.1); Has 1807 Blast hits to 1807 proteins in 277 species: Archae - 0; Bacteria - 0; Metazoa - 736; Fungi - 347; Plants - 385; Viruses - 0; Other Eukaryotes - 339 (source: NCBI BLink).
MSTRG.1321.3	MSTRG.1321	AUR62044295	AUR62044295-RA	Chr00	31453828	31456575	j	-
MSTRG.1321.4	MSTRG.1321	AUR62044295	AUR62044295-RA	Chr00	31453830	31456575	j	CONTAINS InterPro DOMAIN/s: Putative harbinger transposase-derived nuclease (InterPro:IPR006912); BEST Arabidopsis thaliana protein match is: unknown protein (TAIR:AT1G43722.1); Has 1807 Blast hits to 1807 proteins in 277 species: Archae - 0; Bacteria - 0; Metazoa - 736; Fungi - 347; Plants - 385; Viruses - 0; Other Eukaryotes - 339 (source: NCBI BLink).
MSTRG.1321.5	MSTRG.1321	AUR62044295	AUR62044295-RA	Chr00	31453846	31456575	j	CONTAINS InterPro DOMAIN/s: Putative harbinger transposase-derived nuclease (InterPro:IPR006912); BEST Arabidopsis thaliana protein match is: unknown protein (TAIR:AT1G43722.1); Has 1807 Blast hits to 1807 proteins in 277 species: Archae - 0; Bacteria - 0; Metazoa - 736; Fungi - 347; Plants - 385; Viruses - 0; Other Eukaryotes - 339 (source: NCBI BLink).
MSTRG.1321.6	MSTRG.1321	AUR62044295	AUR62044295-RA	Chr00	31453860	31456575	j	CONTAINS InterPro DOMAIN/s: Putative harbinger transposase-derived nuclease (InterPro:IPR006912); BEST Arabidopsis thaliana protein match is: unknown protein (TAIR:AT1G43722.1); Has 1807 Blast hits to 1807 proteins in 277 species: Archae - 0; Bacteria - 0; Metazoa - 736; Fungi - 347; Plants - 385; Viruses - 0; Other Eukaryotes - 339 (source: NCBI BLink).
AUR62044295-RA	MSTRG.1321	AUR62044295	AUR62044295-RA	Chr00	31455179	31458340	=	CONTAINS InterPro DOMAIN/s: Putative harbinger transposase-derived nuclease (InterPro:IPR006912); BEST Arabidopsis thaliana protein match is: unknown protein (TAIR:AT1G43722.1); Has 1807 Blast hits to 1807 proteins in 277 species: Archae - 0; Bacteria - 0; Metazoa - 736; Fungi - 347; Plants - 385; Viruses - 0; Other Eukaryotes - 339 (source: NCBI BLink).
MSTRG.1322.1	MSTRG.1322	-	-	Chr00	31453887	31455002	u	-
MSTRG.1323.1	MSTRG.1323	AUR62044295	AUR62044295-RA	Chr00	31455994	31456553	i	-
AUR62044509-RA	MSTRG.1324	AUR62044509	AUR62044509-RA	Chr00	31613202	31618879	=	defective in exine formation protein (DEX1)
MSTRG.1325.1	MSTRG.1325	-	-	Chr00	31744157	31744357	u	-
MSTRG.1326.1	MSTRG.1326	-	-	Chr00	31879977	31880216	u	-
MSTRG.1327.1	MSTRG.1327	-	-	Chr00	31908361	31908591	u	-
MSTRG.1328.1	MSTRG.1328	-	-	Chr00	31927617	31927923	u	-
MSTRG.1329.1	MSTRG.1329	-	-	Chr00	31941421	31941727	u	-
MSTRG.1330.1	MSTRG.1330	-	-	Chr00	31944456	31944762	u	-
MSTRG.1331.1	MSTRG.1331	-	-	Chr00	31947492	31947798	u	-
MSTRG.1332.1	MSTRG.1332	-	-	Chr00	31966247	31966575	u	-
MSTRG.1333.1	MSTRG.1333	-	-	Chr00	32205219	32205567	u	-
MSTRG.1334.1	MSTRG.1334	-	-	Chr00	32251608	32252553	u	-
MSTRG.1335.1	MSTRG.1335	-	-	Chr00	32264914	32265169	u	-
MSTRG.1336.1	MSTRG.1336	-	-	Chr00	32346387	32346889	u	-
MSTRG.1337.1	MSTRG.1337	-	-	Chr00	32368235	32368603	u	-
MSTRG.1338.1	MSTRG.1338	-	-	Chr00	32395295	32395695	u	-
MSTRG.1339.1	MSTRG.1339	-	-	Chr00	32397833	32398119	u	-
MSTRG.1340.1	MSTRG.1340	-	-	Chr00	32410673	32411150	u	-
MSTRG.1341.1	MSTRG.1341	-	-	Chr00	32482554	32482901	u	-
MSTRG.1342.1	MSTRG.1342	-	-	Chr00	32605509	32605882	u	-
AUR62043883-RA	MSTRG.1343	AUR62043883	AUR62043883-RA	Chr00	32665485	32667049	=	alpha/beta-Hydrolases superfamily protein
MSTRG.1344.1	MSTRG.1344	-	-	Chr00	32580159	32592683	u	-
MSTRG.1344.2	MSTRG.1344	-	-	Chr00	32580162	32592683	u	-
MSTRG.1345.1	MSTRG.1345	-	-	Chr00	32580214	32592687	u	-
MSTRG.1346.1	MSTRG.1346	-	-	Chr00	32586442	32588065	u	-
MSTRG.1347.1	MSTRG.1347	-	-	Chr00	32715542	32715792	u	-
MSTRG.1348.1	MSTRG.1348	-	-	Chr00	32752501	32753233	u	-
MSTRG.1349.1	MSTRG.1349	-	-	Chr00	32794539	32794814	u	-
AUR62043884-RA	MSTRG.1350	AUR62043884	AUR62043884-RA	Chr00	32668769	32680827	=	unknown protein; LOCATED IN: chloroplast; EXPRESSED IN: 22 plant structures; EXPRESSED DURING: 13 growth stages; BEST Arabidopsis thaliana protein match is: unknown protein (TAIR:AT2G19390.1); Has 30201 Blast hits to 17322 proteins in 780 species: Archae - 12; Bacteria - 1396; Metazoa - 17338; Fungi - 3422; Plants - 5037; Viruses - 0; Other Eukaryotes - 2996 (source: NCBI BLink).
MSTRG.1350.2	MSTRG.1350	AUR62043884	AUR62043884-RA	Chr00	32670392	32676523	n	unknown protein; LOCATED IN: chloroplast; EXPRESSED IN: 22 plant structures; EXPRESSED DURING: 13 growth stages; BEST Arabidopsis thaliana protein match is: unknown protein (TAIR:AT2G19390.1); Has 30201 Blast hits to 17322 proteins in 780 species: Archae - 12; Bacteria - 1396; Metazoa - 17338; Fungi - 3422; Plants - 5037; Viruses - 0; Other Eukaryotes - 2996 (source: NCBI BLink).
MSTRG.1350.3	MSTRG.1350	AUR62043884	AUR62043884-RA	Chr00	32670606	32676523	n	unknown protein; LOCATED IN: chloroplast; EXPRESSED IN: 22 plant structures; EXPRESSED DURING: 13 growth stages; BEST Arabidopsis thaliana protein match is: unknown protein (TAIR:AT2G19390.1); Has 30201 Blast hits to 17322 proteins in 780 species: Archae - 12; Bacteria - 1396; Metazoa - 17338; Fungi - 3422; Plants - 5037; Viruses - 0; Other Eukaryotes - 2996 (source: NCBI BLink).
MSTRG.1351.1	MSTRG.1351	AUR62043884	AUR62043884-RA	Chr00	32669284	32669542	i	-
MSTRG.1352.1	MSTRG.1352	AUR62043884	AUR62043884-RA	Chr00	32672667	32673111	i	-
MSTRG.1353.1	MSTRG.1353	-	-	Chr00	32830941	32831484	u	-
MSTRG.1354.1	MSTRG.1354	-	-	Chr00	32838711	32839010	u	-
MSTRG.1355.1	MSTRG.1355	-	-	Chr00	33131354	33131853	u	-
MSTRG.1356.1	MSTRG.1356	-	-	Chr00	33186943	33187372	u	-
MSTRG.1357.1	MSTRG.1357	AUR62044555	AUR62044555-RA	Chr00	32816614	32816950	x	-
MSTRG.1358.1	MSTRG.1358	AUR62044555	AUR62044555-RA	Chr00	32816625	32827149	o	-
AUR62044555-RA	MSTRG.1358	AUR62044555	AUR62044555-RA	Chr00	32816833	32826417	=	-
MSTRG.1358.3	MSTRG.1358	AUR62044555	AUR62044555-RA	Chr00	32819559	32824407	i	-
MSTRG.1358.4	MSTRG.1358	AUR62044555	AUR62044555-RA	Chr00	32821224	32827149	o	-
MSTRG.1359.1	MSTRG.1359	AUR62044555	AUR62044555-RA	Chr00	32825320	32826800	x	-
MSTRG.1360.1	MSTRG.1360	AUR62044689	AUR62044689-RA	Chr00	32842739	32846229	o	BED zinc finger ;hAT family dimerisation domain
MSTRG.1360.2	MSTRG.1360	AUR62044689	AUR62044689-RA	Chr00	32842739	32846229	o	BED zinc finger ;hAT family dimerisation domain
AUR62044688-RA	MSTRG.1360	AUR62044688	AUR62044688-RA	Chr00	32843672	32843875	=	-
AUR62044689-RA	MSTRG.1360	AUR62044689	AUR62044689-RA	Chr00	32845025	32845381	=	BED zinc finger ;hAT family dimerisation domain
MSTRG.1361.1	MSTRG.1361	AUR62044688	AUR62044688-RA	Chr00	32843298	32843684	x	-
MSTRG.1362.1	MSTRG.1362	-	-	Chr00	33428552	33429108	u	-
MSTRG.1363.1	MSTRG.1363	-	-	Chr00	33434566	33435261	u	-
MSTRG.1364.1	MSTRG.1364	-	-	Chr00	33438605	33438993	u	-
MSTRG.1365.1	MSTRG.1365	-	-	Chr00	33441303	33441939	u	-
MSTRG.1366.1	MSTRG.1366	-	-	Chr00	33453017	33453362	u	-
MSTRG.1367.1	MSTRG.1367	-	-	Chr00	33906021	33907888	u	-
MSTRG.1368.1	MSTRG.1368	-	-	Chr00	33907966	33908367	u	-
MSTRG.1369.1	MSTRG.1369	-	-	Chr00	33914626	33915178	u	-
MSTRG.1370.1	MSTRG.1370	-	-	Chr00	33916303	33917348	u	-
MSTRG.1371.1	MSTRG.1371	-	-	Chr00	33923010	33923606	u	-
MSTRG.1372.1	MSTRG.1372	-	-	Chr00	33959662	33959912	u	Chloroplast Ycf2;ATPase, AAA type, core
MSTRG.1373.1	MSTRG.1373	-	-	Chr00	33961690	33961921	u	-
MSTRG.1374.1	MSTRG.1374	-	-	Chr00	33964334	33964875	u	-
MSTRG.1375.1	MSTRG.1375	-	-	Chr00	33965273	33966202	u	-
MSTRG.1376.1	MSTRG.1376	-	-	Chr00	33968324	33969021	u	-
MSTRG.1377.1	MSTRG.1377	-	-	Chr00	33969791	33970055	u	-
MSTRG.1378.1	MSTRG.1378	-	-	Chr00	33973855	33974074	u	-
MSTRG.1379.1	MSTRG.1379	-	-	Chr00	33982907	33983210	u	-
MSTRG.1380.1	MSTRG.1380	-	-	Chr00	33985508	33985827	u	-
MSTRG.1381.1	MSTRG.1381	-	-	Chr00	33996524	33996891	u	-
MSTRG.1382.1	MSTRG.1382	-	-	Chr00	33998789	33999240	u	-
MSTRG.1383.1	MSTRG.1383	-	-	Chr00	33999480	33999876	u	-
MSTRG.1384.1	MSTRG.1384	-	-	Chr00	34005977	34006717	u	-
MSTRG.1385.1	MSTRG.1385	-	-	Chr00	34023945	34024529	u	-
MSTRG.1386.1	MSTRG.1386	-	-	Chr00	34029966	34030314	u	-
MSTRG.1387.1	MSTRG.1387	-	-	Chr00	34032230	34032878	u	-
MSTRG.1388.1	MSTRG.1388	AUR62021048	AUR62021048-RA	Chr00	34012949	34017460	o	plastid division1
MSTRG.1388.2	MSTRG.1388	AUR62021048	AUR62021048-RA	Chr00	34012957	34017460	o	plastid division1
AUR62021048-RA	MSTRG.1388	AUR62021048	AUR62021048-RA	Chr00	34016392	34017460	k	plastid division1
MSTRG.1389.1	MSTRG.1389	-	-	Chr00	34013782	34014243	u	-
MSTRG.1390.1	MSTRG.1390	-	-	Chr00	34034202	34034538	u	-
MSTRG.1391.1	MSTRG.1391	-	-	Chr00	34034946	34035256	u	-
MSTRG.1392.1	MSTRG.1392	AUR62021049	AUR62021049-RA	Chr00	34040462	34040723	p	-
MSTRG.1393.1	MSTRG.1393	AUR62021049	AUR62021049-RA	Chr00	34041596	34043320	x	cytokinin response factor 4
AUR62021049-RA	MSTRG.1394	AUR62021049	AUR62021049-RA	Chr00	34041852	34043063	=	cytokinin response factor 4
MSTRG.1395.1	MSTRG.1395	-	-	Chr00	34045388	34045689	u	-
MSTRG.1396.1	MSTRG.1396	-	-	Chr00	34048429	34048901	u	-
MSTRG.1397.1	MSTRG.1397	-	-	Chr00	34052154	34052476	u	-
MSTRG.1398.1	MSTRG.1398	-	-	Chr00	34077531	34078116	u	-
AUR62021050-RA	MSTRG.1399	AUR62021050	AUR62021050-RA	Chr00	34085389	34089208	=	ubiquitin-conjugating enzyme 28
MSTRG.1399.2	MSTRG.1399	AUR62021050	AUR62021050-RA	Chr00	34085402	34087179	j	ubiquitin-conjugating enzyme 28
MSTRG.1399.3	MSTRG.1399	AUR62021050	AUR62021050-RA	Chr00	34085402	34089208	j	ubiquitin-conjugating enzyme 28
MSTRG.1400.1	MSTRG.1400	AUR62021051	AUR62021051-RA	Chr00	34095941	34096201	p	-
AUR62021051-RA	MSTRG.1401	AUR62021051	AUR62021051-RA	Chr00	34090663	34095518	=	myosin heavy chain-related
MSTRG.1402.1	MSTRG.1402	-	-	Chr00	34103132	34103487	u	-
MSTRG.1403.1	MSTRG.1403	AUR62021052	AUR62021052-RA	Chr00	34096452	34098879	x	Leucine-rich repeat protein kinase family protein
AUR62021052-RA	MSTRG.1404	AUR62021052	AUR62021052-RA	Chr00	34096718	34099948	=	Leucine-rich repeat protein kinase family protein
MSTRG.1405.1	MSTRG.1405	-	-	Chr00	34123706	34124077	u	-
MSTRG.1406.1	MSTRG.1406	AUR62021053	AUR62021053-RA	Chr00	34105062	34108836	j	hAT transposon superfamily
AUR62021053-RA	MSTRG.1406	AUR62021053	AUR62021053-RA	Chr00	34105280	34108836	=	hAT transposon superfamily
MSTRG.1407.1	MSTRG.1407	AUR62021053	AUR62021053-RA	Chr00	34107121	34107897	x	hAT transposon superfamily
MSTRG.1408.1	MSTRG.1408	-	-	Chr00	34108930	34110379	u	unknown protein; FUNCTIONS IN: molecular_function unknown; INVOLVED IN: biological_process unknown; LOCATED IN: endomembrane system; Has 31 Blast hits to 31 proteins in 11 species: Archae - 0; Bacteria - 0; Metazoa - 0; Fungi - 0; Plants - 31; Viruses - 0; Other Eukaryotes - 0 (source: NCBI BLink).
MSTRG.1408.2	MSTRG.1408	-	-	Chr00	34108930	34110379	u	unknown protein; FUNCTIONS IN: molecular_function unknown; INVOLVED IN: biological_process unknown; LOCATED IN: endomembrane system; Has 31 Blast hits to 31 proteins in 11 species: Archae - 0; Bacteria - 0; Metazoa - 0; Fungi - 0; Plants - 31; Viruses - 0; Other Eukaryotes - 0 (source: NCBI BLink).
MSTRG.1409.1	MSTRG.1409	-	-	Chr00	34135357	34136023	u	-
MSTRG.1410.1	MSTRG.1410	AUR62021054	AUR62021054-RA	Chr00	34127388	34134353	j	G-box binding factor 3
MSTRG.1410.2	MSTRG.1410	AUR62021054	AUR62021054-RA	Chr00	34127388	34134353	j	G-box binding factor 3
AUR62021054-RA	MSTRG.1410	AUR62021054	AUR62021054-RA	Chr00	34127449	34133460	=	G-box binding factor 3
MSTRG.1410.4	MSTRG.1410	AUR62021054	AUR62021054-RA	Chr00	34127513	34134353	j	G-box binding factor 3
MSTRG.1410.5	MSTRG.1410	AUR62021054	AUR62021054-RA	Chr00	34127515	34134353	j	G-box binding factor 3
MSTRG.1411.1	MSTRG.1411	AUR62021054	AUR62021054-RA	Chr00	34127516	34127737	x	-
MSTRG.1412.1	MSTRG.1412	AUR62021054	AUR62021054-RA	Chr00	34132905	34133220	x	-
MSTRG.1413.1	MSTRG.1413	-	-	Chr00	34160696	34161063	u	-
MSTRG.1414.1	MSTRG.1414	-	-	Chr00	34168148	34168838	u	-
MSTRG.1415.1	MSTRG.1415	-	-	Chr00	34169125	34169614	u	-
MSTRG.1416.1	MSTRG.1416	-	-	Chr00	34171981	34172350	u	-
MSTRG.1417.1	MSTRG.1417	AUR62021055	AUR62021055-RA	Chr00	34138081	34144069	m	Ubiquitin-associated/translation elongation factor EF1B protein
MSTRG.1417.2	MSTRG.1417	AUR62021055	AUR62021055-RA	Chr00	34138081	34144069	j	Ubiquitin-associated/translation elongation factor EF1B protein
MSTRG.1417.3	MSTRG.1417	AUR62021055	AUR62021055-RA	Chr00	34138094	34142278	j	Ubiquitin-associated/translation elongation factor EF1B protein
AUR62021055-RA	MSTRG.1417	AUR62021055	AUR62021055-RA	Chr00	34138737	34144069	=	Ubiquitin-associated/translation elongation factor EF1B protein
MSTRG.1418.1	MSTRG.1418	AUR62021056	AUR62021056-RA	Chr00	34144220	34159351	j	Galactosyltransferase family protein
MSTRG.1418.2	MSTRG.1418	AUR62021056	AUR62021056-RA	Chr00	34144229	34159351	j	Galactosyltransferase family protein
AUR62021056-RA	MSTRG.1418	AUR62021056	AUR62021056-RA	Chr00	34152804	34159351	=	Galactosyltransferase family protein
MSTRG.1419.1	MSTRG.1419	AUR62021057	AUR62021057-RA	Chr00	34175536	34186652	j	multidrug resistance-associated protein 14
MSTRG.1419.2	MSTRG.1419	AUR62021057	AUR62021057-RA	Chr00	34175979	34186652	k	multidrug resistance-associated protein 14
AUR62021057-RA	MSTRG.1419	AUR62021057	AUR62021057-RA	Chr00	34179963	34186652	=	multidrug resistance-associated protein 14
MSTRG.1420.1	MSTRG.1420	AUR62021057	AUR62021057-RA	Chr00	34185999	34186289	x	multidrug resistance-associated protein 14
MSTRG.1421.1	MSTRG.1421	-	-	Chr00	34187597	34187816	u	-
MSTRG.1422.1	MSTRG.1422	-	-	Chr00	34200856	34201454	u	-
MSTRG.1423.1	MSTRG.1423	-	-	Chr00	34206380	34206690	u	-
MSTRG.1424.1	MSTRG.1424	-	-	Chr00	34207048	34207996	u	-
AUR62021059-RA	MSTRG.1425	AUR62021059	AUR62021059-RA	Chr00	34210900	34214725	=	-
MSTRG.1426.1	MSTRG.1426	AUR62021059	AUR62021059-RA	Chr00	34212365	34214230	x	Ribonuclease H-like superfamily protein
MSTRG.1427.1	MSTRG.1427	AUR62021058	AUR62021058-RA	Chr00	34189927	34198130	k	multidrug resistance-associated protein 14
AUR62021058-RA	MSTRG.1427	AUR62021058	AUR62021058-RA	Chr00	34191016	34198130	=	multidrug resistance-associated protein 14
MSTRG.1428.1	MSTRG.1428	AUR62021058	AUR62021058-RA	Chr00	34197704	34197998	x	multidrug resistance-associated protein 14
MSTRG.1429.1	MSTRG.1429	-	-	Chr00	34267366	34267641	u	-
MSTRG.1430.1	MSTRG.1430	-	-	Chr00	34283409	34283762	u	-
AUR62021068-RA	MSTRG.1431	AUR62021068	AUR62021068-RA	Chr00	34284296	34286338	=	chitinase A
MSTRG.1432.1	MSTRG.1432	AUR62021063	AUR62021063-RA	Chr00	34268927	34280220	n	chitinase A
AUR62021063-RA	MSTRG.1432	AUR62021063	AUR62021063-RA	Chr00	34269084	34273478	=	unknown protein; Has 30201 Blast hits to 17322 proteins in 780 species: Archae - 12; Bacteria - 1396; Metazoa - 17338; Fungi - 3422; Plants - 5037; Viruses - 0; Other Eukaryotes - 2996 (source: NCBI BLink).
AUR62021064-RA	MSTRG.1432	AUR62021064	AUR62021064-RA	Chr00	34274777	34276432	=	Tetratricopeptide repeat (TPR)-like superfamily protein
MSTRG.1432.4	MSTRG.1432	AUR62021065	AUR62021065-RA	Chr00	34276449	34280220	j	chitinase A
AUR62021065-RA	MSTRG.1432	AUR62021065	AUR62021065-RA	Chr00	34278508	34280220	=	chitinase A
MSTRG.1433.1	MSTRG.1433	AUR62021063	AUR62021063-RA	Chr00	34269363	34269654	x	-
MSTRG.1434.1	MSTRG.1434	AUR62021063	AUR62021063-RA	Chr00	34271466	34271853	x	-
MSTRG.1435.1	MSTRG.1435	-	-	Chr00	34290229	34290669	u	-
MSTRG.1436.1	MSTRG.1436	AUR62021069	AUR62021069-RA	Chr00	34287045	34288024	x	chitinase A
AUR62021069-RA	MSTRG.1437	AUR62021069	AUR62021069-RA	Chr00	34287078	34287986	=	chitinase A
MSTRG.1438.1	MSTRG.1438	AUR62021070	AUR62021070-RA	Chr00	34293069	34294772	x	chitinase A
AUR62021070-RA	MSTRG.1439	AUR62021070	AUR62021070-RA	Chr00	34293112	34294044	=	chitinase A
MSTRG.1440.1	MSTRG.1440	AUR62021061	AUR62021061-RA	Chr00	34235149	34254408	j	multidrug resistance-associated protein 14
MSTRG.1440.2	MSTRG.1440	AUR62021061	AUR62021061-RA	Chr00	34235173	34242279	j	multidrug resistance-associated protein 14
MSTRG.1440.3	MSTRG.1440	AUR62021061	AUR62021061-RA	Chr00	34235368	34242279	j	multidrug resistance-associated protein 14
AUR62021061-RA	MSTRG.1440	AUR62021061	AUR62021061-RA	Chr00	34235979	34249789	=	multidrug resistance-associated protein 14
MSTRG.1440.5	MSTRG.1440	AUR62021062	AUR62021062-RA	Chr00	34251704	34260630	x	unknown protein; FUNCTIONS IN: molecular_function unknown; INVOLVED IN: biological_process unknown; LOCATED IN: chloroplast; EXPRESSED IN: 23 plant structures; EXPRESSED DURING: 13 growth stages; CONTAINS InterPro DOMAIN/s: Protein of unknown function DUF3143 (InterPro:IPR021489); Has 1807 Blast hits to 1807 proteins in 277 species: Archae - 0; Bacteria - 0; Metazoa - 736; Fungi - 347; Plants - 3…
MSTRG.1441.1	MSTRG.1441	AUR62021061	AUR62021061-RA	Chr00	34235592	34236037	x	multidrug resistance-associated protein 14
MSTRG.1442.1	MSTRG.1442	AUR62021061	AUR62021061-RA	Chr00	34237559	34242701	x	multidrug resistance-associated protein 14
MSTRG.1442.2	MSTRG.1442	AUR62021061	AUR62021061-RA	Chr00	34237613	34239606	x	multidrug resistance-associated protein 14
MSTRG.1442.3	MSTRG.1442	AUR62021061	AUR62021061-RA	Chr00	34237613	34239606	x	multidrug resistance-associated protein 14
MSTRG.1442.4	MSTRG.1442	AUR62021061	AUR62021061-RA	Chr00	34239607	34242701	x	multidrug resistance-associated protein 14
MSTRG.1443.1	MSTRG.1443	AUR62021061	AUR62021061-RA	Chr00	34244076	34244815	x	multidrug resistance-associated protein 14
MSTRG.1444.1	MSTRG.1444	AUR62021061	AUR62021061-RA	Chr00	34245488	34245704	x	multidrug resistance-associated protein 14
MSTRG.1445.1	MSTRG.1445	AUR62021062	AUR62021062-RA	Chr00	34251879	34252236	p	unknown protein; FUNCTIONS IN: molecular_function unknown; INVOLVED IN: biological_process unknown; LOCATED IN: chloroplast; EXPRESSED IN: 23 plant structures; EXPRESSED DURING: 13 growth stages; CONTAINS InterPro DOMAIN/s: Protein of unknown function DUF3143 (InterPro:IPR021489); Has 1807 Blast hits to 1807 proteins in 277 species: Archae - 0; Bacteria - 0; Metazoa - 736; Fungi - 347; Plants - 3…
AUR62021062-RA	MSTRG.1446	AUR62021062	AUR62021062-RA	Chr00	34253699	34266214	=	multidrug resistance-associated protein 14
MSTRG.1447.1	MSTRG.1447	AUR62021062	AUR62021062-RA	Chr00	34264663	34264960	x	multidrug resistance-associated protein 14
MSTRG.1448.1	MSTRG.1448	AUR62021071	AUR62021071-RA	Chr00	34297462	34301813	k	BEST Arabidopsis thaliana protein match is: loricrin-related (TAIR:AT5G64550.1); Has 3596 Blast hits to 2004 proteins in 150 species: Archae - 0; Bacteria - 54; Metazoa - 1597; Fungi - 38; Plants - 513; Viruses - 9; Other Eukaryotes - 1385 (source: NCBI BLink).
AUR62021071-RA	MSTRG.1448	AUR62021071	AUR62021071-RA	Chr00	34299595	34301813	=	BEST Arabidopsis thaliana protein match is: loricrin-related (TAIR:AT5G64550.1); Has 3596 Blast hits to 2004 proteins in 150 species: Archae - 0; Bacteria - 54; Metazoa - 1597; Fungi - 38; Plants - 513; Viruses - 9; Other Eukaryotes - 1385 (source: NCBI BLink).
MSTRG.1449.1	MSTRG.1449	AUR62021072	AUR62021072-RA	Chr00	34301942	34309413	m	plastidic pyruvate kinase beta subunit 1
AUR62021072-RA	MSTRG.1449	AUR62021072	AUR62021072-RA	Chr00	34302179	34309413	=	plastidic pyruvate kinase beta subunit 1
MSTRG.1450.1	MSTRG.1450	AUR62021072	AUR62021072-RA	Chr00	34307020	34307501	x	plastidic pyruvate kinase beta subunit 1
MSTRG.1451.1	MSTRG.1451	AUR62021072	AUR62021072-RA	Chr00	34309030	34309307	x	-
AUR62021073-RA	MSTRG.1452	AUR62021073	AUR62021073-RA	Chr00	34310770	34322127	=	timeless family protein
MSTRG.1452.2	MSTRG.1452	AUR62021073	AUR62021073-RA	Chr00	34310786	34322127	j	timeless family protein
MSTRG.1453.1	MSTRG.1453	AUR62021073	AUR62021073-RA	Chr00	34314289	34314844	i	-
MSTRG.1454.1	MSTRG.1454	AUR62021077	AUR62021077-RA	Chr00	34362353	34366565	j	Protein kinase superfamily protein
MSTRG.1454.2	MSTRG.1454	AUR62021077	AUR62021077-RA	Chr00	34362499	34366565	j	Protein kinase superfamily protein
AUR62021077-RA	MSTRG.1454	AUR62021077	AUR62021077-RA	Chr00	34362638	34366565	=	Protein kinase superfamily protein
MSTRG.1455.1	MSTRG.1455	-	-	Chr00	34379277	34379565	u	-
MSTRG.1456.1	MSTRG.1456	AUR62021078	AUR62021078-RA	Chr00	34369448	34377523	n	unknown protein; Has 30201 Blast hits to 17322 proteins in 780 species: Archae - 12; Bacteria - 1396; Metazoa - 17338; Fungi - 3422; Plants - 5037; Viruses - 0; Other Eukaryotes - 2996 (source: NCBI BLink).
MSTRG.1456.2	MSTRG.1456	AUR62021078	AUR62021078-RA	Chr00	34369489	34377523	n	unknown protein; Has 30201 Blast hits to 17322 proteins in 780 species: Archae - 12; Bacteria - 1396; Metazoa - 17338; Fungi - 3422; Plants - 5037; Viruses - 0; Other Eukaryotes - 2996 (source: NCBI BLink).
MSTRG.1456.3	MSTRG.1456	AUR62021078	AUR62021078-RA	Chr00	34369512	34377523	n	unknown protein; Has 30201 Blast hits to 17322 proteins in 780 species: Archae - 12; Bacteria - 1396; Metazoa - 17338; Fungi - 3422; Plants - 5037; Viruses - 0; Other Eukaryotes - 2996 (source: NCBI BLink).
AUR62021078-RA	MSTRG.1456	AUR62021078	AUR62021078-RA	Chr00	34376312	34377523	=	unknown protein; Has 30201 Blast hits to 17322 proteins in 780 species: Archae - 12; Bacteria - 1396; Metazoa - 17338; Fungi - 3422; Plants - 5037; Viruses - 0; Other Eukaryotes - 2996 (source: NCBI BLink).
MSTRG.1457.1	MSTRG.1457	-	-	Chr00	34369874	34370087	u	-
MSTRG.1458.1	MSTRG.1458	AUR62021078	AUR62021078-RA	Chr00	34374876	34377523	x	unknown protein; Has 30201 Blast hits to 17322 proteins in 780 species: Archae - 12; Bacteria - 1396; Metazoa - 17338; Fungi - 3422; Plants - 5037; Viruses - 0; Other Eukaryotes - 2996 (source: NCBI BLink).
MSTRG.1459.1	MSTRG.1459	-	-	Chr00	34394077	34394671	u	-
MSTRG.1460.1	MSTRG.1460	-	-	Chr00	34409172	34409724	u	-
MSTRG.1461.1	MSTRG.1461	-	-	Chr00	34415166	34415509	u	-
MSTRG.1462.1	MSTRG.1462	-	-	Chr00	34429084	34429932	u	FAR1-related sequence 5
MSTRG.1463.1	MSTRG.1463	AUR62021074	AUR62021074-RA	Chr00	34333683	34345199	j	TRICHOME BIREFRINGENCE-LIKE 13
MSTRG.1463.2	MSTRG.1463	AUR62021074	AUR62021074-RA	Chr00	34333810	34345199	j	TRICHOME BIREFRINGENCE-LIKE 13
MSTRG.1463.3	MSTRG.1463	AUR62021076	AUR62021076-RA	Chr00	34333913	34360702	j	TRICHOME BIREFRINGENCE-LIKE 13
MSTRG.1463.4	MSTRG.1463	AUR62021076	AUR62021076-RA	Chr00	34333913	34361962	j	TRICHOME BIREFRINGENCE-LIKE 13
AUR62021074-RA	MSTRG.1463	AUR62021074	AUR62021074-RA	Chr00	34333992	34344136	=	TRICHOME BIREFRINGENCE-LIKE 13
AUR62021076-RA	MSTRG.1463	AUR62021076	AUR62021076-RA	Chr00	34352412	34360702	=	Transducin/WD40 repeat-like superfamily protein
MSTRG.1463.7	MSTRG.1463	AUR62021076	AUR62021076-RA	Chr00	34360112	34361795	j	-
MSTRG.1464.1	MSTRG.1464	-	-	Chr00	34344447	34345190	u	TRICHOME BIREFRINGENCE-LIKE 13
MSTRG.1465.1	MSTRG.1465	AUR62021075	AUR62021075-RA	Chr00	34347014	34350154	x	disease resistance family protein / LRR family protein
AUR62021075-RA	MSTRG.1466	AUR62021075	AUR62021075-RA	Chr00	34347134	34350154	=	disease resistance family protein / LRR family protein
MSTRG.1467.1	MSTRG.1467	AUR62021076	AUR62021076-RA	Chr00	34357263	34357703	i	-
MSTRG.1468.1	MSTRG.1468	AUR62021076	AUR62021076-RA	Chr00	34360003	34360315	x	-
MSTRG.1469.1	MSTRG.1469	-	-	Chr00	34430444	34433635	u	-
MSTRG.1470.1	MSTRG.1470	-	-	Chr00	34434209	34434500	u	-
MSTRG.1471.1	MSTRG.1471	AUR62021079	AUR62021079-RA	Chr00	34388196	34392246	m	SLAC1 homologue 3
MSTRG.1471.2	MSTRG.1471	AUR62021079	AUR62021079-RA	Chr00	34388198	34392246	n	SLAC1 homologue 3
AUR62021079-RA	MSTRG.1471	AUR62021079	AUR62021079-RA	Chr00	34388736	34392246	=	SLAC1 homologue 3
MSTRG.1472.1	MSTRG.1472	AUR62021079	AUR62021079-RA	Chr00	34388510	34390054	x	SLAC1 homologue 3
MSTRG.1473.1	MSTRG.1473	-	-	Chr00	34457916	34458330	u	-
MSTRG.1474.1	MSTRG.1474	AUR62021080	AUR62021080-RA	Chr00	34445314	34451147	m	P-loop containing nucleoside triphosphate hydrolases superfamily protein
AUR62021080-RA	MSTRG.1474	AUR62021080	AUR62021080-RA	Chr00	34445629	34451147	=	P-loop containing nucleoside triphosphate hydrolases superfamily protein
MSTRG.1475.1	MSTRG.1475	-	-	Chr00	34474229	34474492	u	-
AUR62021081-RA	MSTRG.1476	AUR62021081	AUR62021081-RA	Chr00	34462135	34466728	=	F-box family protein
MSTRG.1476.2	MSTRG.1476	AUR62021081	AUR62021081-RA	Chr00	34462145	34466728	j	F-box family protein
AUR62021082-RA	MSTRG.1477	AUR62021082	AUR62021082-RA	Chr00	34466738	34470207	=	VIRB2-interacting protein 3
MSTRG.1478.1	MSTRG.1478	-	-	Chr00	34487867	34488301	u	-
MSTRG.1479.1	MSTRG.1479	AUR62021083	AUR62021083-RA	Chr00	34482274	34484067	x	-
AUR62021083-RA	MSTRG.1480	AUR62021083	AUR62021083-RA	Chr00	34482835	34484041	=	-
MSTRG.1481.1	MSTRG.1481	-	-	Chr00	34500725	34501295	u	-
MSTRG.1482.1	MSTRG.1482	AUR62021084	AUR62021084-RA	Chr00	34495014	34498914	j	disease resistance family protein / LRR family protein
AUR62021084-RA	MSTRG.1482	AUR62021084	AUR62021084-RA	Chr00	34495368	34498914	=	disease resistance family protein / LRR family protein
MSTRG.1483.1	MSTRG.1483	-	-	Chr00	34531936	34532209	u	-
MSTRG.1484.1	MSTRG.1484	-	-	Chr00	34536582	34536846	u	-
MSTRG.1485.1	MSTRG.1485	AUR62021088	AUR62021088-RA	Chr00	34533776	34535930	x	ABC-2 type transporter family protein
AUR62021088-RA	MSTRG.1486	AUR62021088	AUR62021088-RA	Chr00	34533918	34535719	=	ABC-2 type transporter family protein
MSTRG.1487.1	MSTRG.1487	-	-	Chr00	34539459	34539768	u	-
AUR62021089-RA	MSTRG.1488	AUR62021089	AUR62021089-RA	Chr00	34540748	34542166	=	UDP-glucosyl transferase 88A1
MSTRG.1489.1	MSTRG.1489	-	-	Chr00	34545500	34545848	u	-
MSTRG.1490.1	MSTRG.1490	-	-	Chr00	34579801	34580068	u	-
AUR62021096-RA	MSTRG.1491	AUR62021096	AUR62021096-RA	Chr00	34582360	34586802	=	dihydrodipicolinate synthase
MSTRG.1492.1	MSTRG.1492	AUR62021091	AUR62021091-RA	Chr00	34557492	34571536	m	UDP-glucosyl transferase 88A1
AUR62021091-RA	MSTRG.1492	AUR62021091	AUR62021091-RA	Chr00	34557585	34559013	=	-
AUR62021093-RA	MSTRG.1492	AUR62021093	AUR62021093-RA	Chr00	34569985	34571536	=	UDP-glucosyl transferase 88A1
AUR62021092-RA	MSTRG.1493	AUR62021092	AUR62021092-RA	Chr00	34562077	34566742	=	UDP-glucosyl transferase 88A1
MSTRG.1493.2	MSTRG.1493	AUR62021095	AUR62021095-RA	Chr00	34564386	34579283	k	phosphatase-related
AUR62021094-RA	MSTRG.1493	AUR62021094	AUR62021094-RA	Chr00	34572702	34574558	=	UDP-glucosyl transferase 88A1
AUR62021095-RA	MSTRG.1493	AUR62021095	AUR62021095-RA	Chr00	34574559	34579283	=	phosphatase-related
MSTRG.1494.1	MSTRG.1494	-	-	Chr00	34567998	34568558	u	-
MSTRG.1495.1	MSTRG.1495	AUR62021093	AUR62021093-RA	Chr00	34569233	34573250	x	UDP-glucosyl transferase 88A1
MSTRG.1496.1	MSTRG.1496	AUR62021094	AUR62021094-RA	Chr00	34573799	34574159	x	-
MSTRG.1497.1	MSTRG.1497	-	-	Chr00	34598677	34599017	u	-
AUR62021097-RA	MSTRG.1498	AUR62021097	AUR62021097-RA	Chr00	34587496	34592118	=	Glycosyl hydrolases family 31 protein
AUR62021099-RA	MSTRG.1499	AUR62021099	AUR62021099-RA	Chr00	34614720	34628427	=	disease resistance family protein / LRR family protein
MSTRG.1500.1	MSTRG.1500	AUR62021099	AUR62021099-RA	Chr00	34625884	34626199	i	-
MSTRG.1501.1	MSTRG.1501	-	-	Chr00	34660628	34660893	u	-
MSTRG.1502.1	MSTRG.1502	AUR62021100	AUR62021100-RA	Chr00	34629319	34640955	j	Glycosyl hydrolases family 31 protein
AUR62021100-RA	MSTRG.1502	AUR62021100	AUR62021100-RA	Chr00	34629319	34640406	=	Glycosyl hydrolases family 31 protein
MSTRG.1502.3	MSTRG.1502	AUR62021100	AUR62021100-RA	Chr00	34634266	34636134	j	Glycosyl hydrolases family 31 protein
MSTRG.1503.1	MSTRG.1503	AUR62021100	AUR62021100-RA	Chr00	34636432	34636760	x	Glycosyl hydrolases family 31 protein
MSTRG.1504.1	MSTRG.1504	-	-	Chr00	34663432	34663747	u	-
AUR62021101-RA	MSTRG.1505	AUR62021101	AUR62021101-RA	Chr00	34656729	34658003	=	WRKY DNA-binding protein 27
MSTRG.1506.1	MSTRG.1506	AUR62021101	AUR62021101-RA	Chr00	34657261	34657985	x	WRKY DNA-binding protein 27
AUR62021102-RA	MSTRG.1507	AUR62021102	AUR62021102-RA	Chr00	34666383	34673731	=	Tic22-like family protein
MSTRG.1507.2	MSTRG.1507	AUR62021102	AUR62021102-RA	Chr00	34666388	34673731	n	Tic22-like family protein
MSTRG.1507.3	MSTRG.1507	AUR62021102	AUR62021102-RA	Chr00	34666426	34673731	n	Tic22-like family protein
MSTRG.1508.1	MSTRG.1508	AUR62021102	AUR62021102-RA	Chr00	34672152	34672438	i	-
MSTRG.1509.1	MSTRG.1509	AUR62021103	AUR62021103-RA	Chr00	34674713	34681977	j	DnaJ / Sec63 Brl domains-containing protein
MSTRG.1509.2	MSTRG.1509	AUR62021103	AUR62021103-RA	Chr00	34674802	34681977	k	DnaJ / Sec63 Brl domains-containing protein
MSTRG.1509.3	MSTRG.1509	AUR62021103	AUR62021103-RA	Chr00	34674994	34681977	j	DnaJ / Sec63 Brl domains-containing protein
AUR62021103-RA	MSTRG.1509	AUR62021103	AUR62021103-RA	Chr00	34675228	34681977	=	DnaJ / Sec63 Brl domains-containing protein
AUR62021104-RA	MSTRG.1510	AUR62021104	AUR62021104-RA	Chr00	34682074	34689367	=	Pentatricopeptide repeat (PPR) superfamily protein
MSTRG.1510.2	MSTRG.1510	AUR62021104	AUR62021104-RA	Chr00	34682090	34685619	j	Pentatricopeptide repeat (PPR) superfamily protein
MSTRG.1511.1	MSTRG.1511	AUR62021104	AUR62021104-RA	Chr00	34685519	34685780	i	-
MSTRG.1512.1	MSTRG.1512	AUR62021105	AUR62021105-RA	Chr00	34693941	34708619	n	Pentatricopeptide repeat (PPR) superfamily protein
AUR62021105-RA	MSTRG.1512	AUR62021105	AUR62021105-RA	Chr00	34694152	34708619	=	Pentatricopeptide repeat (PPR) superfamily protein
MSTRG.1513.1	MSTRG.1513	AUR62021106	AUR62021106-RA	Chr00	34719478	34722160	o	unknown protein; CONTAINS InterPro DOMAIN/s: Protein of unknown function DUF602 (InterPro:IPR006735); Has 385 Blast hits to 385 proteins in 189 species: Archae - 0; Bacteria - 0; Metazoa - 153; Fungi - 117; Plants - 50; Viruses - 0; Other Eukaryotes - 65 (source: NCBI BLink).
MSTRG.1513.2	MSTRG.1513	AUR62021106	AUR62021106-RA	Chr00	34719583	34722160	o	unknown protein; CONTAINS InterPro DOMAIN/s: Protein of unknown function DUF602 (InterPro:IPR006735); Has 385 Blast hits to 385 proteins in 189 species: Archae - 0; Bacteria - 0; Metazoa - 153; Fungi - 117; Plants - 50; Viruses - 0; Other Eukaryotes - 65 (source: NCBI BLink).
AUR62021106-RA	MSTRG.1513	AUR62021106	AUR62021106-RA	Chr00	34720058	34722160	=	unknown protein; CONTAINS InterPro DOMAIN/s: Protein of unknown function DUF602 (InterPro:IPR006735); Has 385 Blast hits to 385 proteins in 189 species: Archae - 0; Bacteria - 0; Metazoa - 153; Fungi - 117; Plants - 50; Viruses - 0; Other Eukaryotes - 65 (source: NCBI BLink).
MSTRG.1514.1	MSTRG.1514	AUR62021106	AUR62021106-RA	Chr00	34720119	34722161	x	unknown protein; CONTAINS InterPro DOMAIN/s: Protein of unknown function DUF602 (InterPro:IPR006735); Has 385 Blast hits to 385 proteins in 189 species: Archae - 0; Bacteria - 0; Metazoa - 153; Fungi - 117; Plants - 50; Viruses - 0; Other Eukaryotes - 65 (source: NCBI BLink).
MSTRG.1515.1	MSTRG.1515	AUR62021108	AUR62021108-RA	Chr00	34723919	34725414	o	NAD(P)-binding Rossmann-fold superfamily protein
AUR62021108-RA	MSTRG.1515	AUR62021108	AUR62021108-RA	Chr00	34724286	34725414	=	NAD(P)-binding Rossmann-fold superfamily protein
MSTRG.1516.1	MSTRG.1516	AUR62021107	AUR62021107-RA	Chr00	34723942	34725382	n	NAD(P)-binding Rossmann-fold superfamily protein
AUR62021107-RA	MSTRG.1516	AUR62021107	AUR62021107-RA	Chr00	34724126	34732581	=	DNA primases
MSTRG.1517.1	MSTRG.1517	-	-	Chr00	34743847	34744640	u	-
MSTRG.1518.1	MSTRG.1518	-	-	Chr00	34747185	34747680	u	TTF-type zinc finger protein with HAT dimerisation domain
AUR62021109-RA	MSTRG.1519	AUR62021109	AUR62021109-RA	Chr00	34733468	34740737	=	CBS domain-containing protein with a domain of unknown function (DUF21)
MSTRG.1519.2	MSTRG.1519	AUR62021109	AUR62021109-RA	Chr00	34733513	34740737	j	CBS domain-containing protein with a domain of unknown function (DUF21)
MSTRG.1520.1	MSTRG.1520	AUR62021109	AUR62021109-RA	Chr00	34735458	34735735	x	CBS domain-containing protein with a domain of unknown function (DUF21)
AUR62021114-RA	MSTRG.1521	AUR62021114	AUR62021114-RA	Chr00	34773847	34774047	=	-
MSTRG.1522.1	MSTRG.1522	-	-	Chr00	34789025	34789503	u	-
MSTRG.1523.1	MSTRG.1523	AUR62021110	AUR62021110-RA	Chr00	34749390	34762686	k	CBS domain-containing protein with a domain of unknown function (DUF21)
AUR62021110-RA	MSTRG.1523	AUR62021110	AUR62021110-RA	Chr00	34749477	34756655	=	Calcium-dependent lipid-binding (CaLB domain) family protein
MSTRG.1523.3	MSTRG.1523	AUR62021111	AUR62021111-RA	Chr00	34754474	34762993	j	CBS domain-containing protein with a domain of unknown function (DUF21)
AUR62021111-RA	MSTRG.1523	AUR62021111	AUR62021111-RA	Chr00	34757315	34762817	=	CBS domain-containing protein with a domain of unknown function (DUF21)
MSTRG.1523.5	MSTRG.1523	AUR62021111	AUR62021111-RA	Chr00	34760250	34760920	j	CBS domain-containing protein with a domain of unknown function (DUF21)
MSTRG.1524.1	MSTRG.1524	AUR62021111	AUR62021111-RA	Chr00	34761053	34761265	x	-
MSTRG.1525.1	MSTRG.1525	AUR62021111	AUR62021111-RA	Chr00	34762124	34762414	x	-
AUR62021112-RA	MSTRG.1526	AUR62021112	AUR62021112-RA	Chr00	34763079	34763630	=	Protein of unknown function (DUF3464)
MSTRG.1527.1	MSTRG.1527	AUR62021113	AUR62021113-RA	Chr00	34763384	34773035	j	Homeodomain-like superfamily protein
AUR62021113-RA	MSTRG.1527	AUR62021113	AUR62021113-RA	Chr00	34763945	34773035	=	Homeodomain-like superfamily protein
MSTRG.1528.1	MSTRG.1528	AUR62021115	AUR62021115-RA	Chr00	34777827	34779553	j	Heavy metal transport/detoxification superfamily protein
MSTRG.1528.2	MSTRG.1528	AUR62021115	AUR62021115-RA	Chr00	34778232	34783181	k	Heavy metal transport/detoxification superfamily protein
AUR62021115-RA	MSTRG.1528	AUR62021115	AUR62021115-RA	Chr00	34778903	34783181	=	Heavy metal transport/detoxification superfamily protein
MSTRG.1528.4	MSTRG.1528	AUR62021115	AUR62021115-RA	Chr00	34781900	34783181	j	Heavy metal transport/detoxification superfamily protein
MSTRG.1529.1	MSTRG.1529	AUR62021115	AUR62021115-RA	Chr00	34779790	34780088	i	-
AUR62021118-RA	MSTRG.1530	AUR62021118	AUR62021118-RA	Chr00	34802687	34806293	=	heat shock protein 90.1
MSTRG.1531.1	MSTRG.1531	AUR62021116	AUR62021116-RA	Chr00	34790057	34794073	k	Heavy metal transport/detoxification superfamily protein
AUR62021116-RA	MSTRG.1531	AUR62021116	AUR62021116-RA	Chr00	34790527	34794073	=	Heavy metal transport/detoxification superfamily protein
MSTRG.1531.3	MSTRG.1531	AUR62021116	AUR62021116-RA	Chr00	34792909	34794073	j	Heavy metal transport/detoxification superfamily protein
MSTRG.1531.4	MSTRG.1531	AUR62021116	AUR62021116-RA	Chr00	34792929	34794073	j	Heavy metal transport/detoxification superfamily protein
MSTRG.1532.1	MSTRG.1532	AUR62021116	AUR62021116-RA	Chr00	34793413	34793693	x	-
AUR62021117-RA	MSTRG.1533	AUR62021117	AUR62021117-RA	Chr00	34794149	34800896	=	-
MSTRG.1534.1	MSTRG.1534	AUR62021117	AUR62021117-RA	Chr00	34794456	34794763	x	-
MSTRG.1535.1	MSTRG.1535	AUR62021117	AUR62021117-RA	Chr00	34800714	34801073	x	-
MSTRG.1536.1	MSTRG.1536	AUR62021119	AUR62021119-RA	Chr00	34809169	34816902	j	glutaminyl cyclase
AUR62021119-RA	MSTRG.1536	AUR62021119	AUR62021119-RA	Chr00	34809170	34816902	=	glutaminyl cyclase
MSTRG.1537.1	MSTRG.1537	AUR62021120	AUR62021120-RA	Chr00	34817749	34822195	j	FUNCTIONS IN: molecular_function unknown; INVOLVED IN: biological_process unknown; LOCATED IN: endomembrane system; EXPRESSED IN: 24 plant structures; EXPRESSED DURING: 15 growth stages; CONTAINS InterPro DOMAIN/s: CHD5-like protein (InterPro:IPR007514); Has 30201 Blast hits to 17322 proteins in 780 species: Archae - 12; Bacteria - 1396; Metazoa - 17338; Fungi - 3422; Plants - 5037; Viruses - 0; …
AUR62021120-RA	MSTRG.1537	AUR62021120	AUR62021120-RA	Chr00	34817780	34820312	=	FUNCTIONS IN: molecular_function unknown; INVOLVED IN: biological_process unknown; LOCATED IN: endomembrane system; EXPRESSED IN: 24 plant structures; EXPRESSED DURING: 15 growth stages; CONTAINS InterPro DOMAIN/s: CHD5-like protein (InterPro:IPR007514); Has 30201 Blast hits to 17322 proteins in 780 species: Archae - 12; Bacteria - 1396; Metazoa - 17338; Fungi - 3422; Plants - 5037; Viruses - 0; …
AUR62021122-RA	MSTRG.1538	AUR62021122	AUR62021122-RA	Chr00	34829142	34832620	=	BED zinc finger ;hAT family dimerisation domain
MSTRG.1539.1	MSTRG.1539	AUR62021122	AUR62021122-RA	Chr00	34830868	34831219	i	-
AUR62021121-RA	MSTRG.1540	AUR62021121	AUR62021121-RA	Chr00	34822470	34829090	=	Pectin lyase-like superfamily protein
MSTRG.1541.1	MSTRG.1541	AUR62021121	AUR62021121-RA	Chr00	34825082	34825382	i	-
MSTRG.1542.1	MSTRG.1542	AUR62021121	AUR62021121-RA	Chr00	34825710	34826007	i	-
AUR62021123-RA	MSTRG.1543	AUR62021123	AUR62021123-RA	Chr00	34834306	34839424	=	Pectin lyase-like superfamily protein
MSTRG.1544.1	MSTRG.1544	-	-	Chr00	34861207	34861530	u	-
MSTRG.1545.1	MSTRG.1545	-	-	Chr00	34862399	34862921	u	-
MSTRG.1546.1	MSTRG.1546	AUR62021124	AUR62021124-RA	Chr00	34847487	34852243	j	beta-hydroxylase 1
AUR62021124-RA	MSTRG.1546	AUR62021124	AUR62021124-RA	Chr00	34847578	34852243	=	beta-hydroxylase 1
MSTRG.1547.1	MSTRG.1547	-	-	Chr00	34874429	34878052	u	-
MSTRG.1547.2	MSTRG.1547	-	-	Chr00	34874755	34878052	u	-
MSTRG.1548.1	MSTRG.1548	-	-	Chr00	34874786	34877512	u	-
AUR62021125-RA	MSTRG.1549	AUR62021125	AUR62021125-RA	Chr00	34863051	34868666	=	U-box domain-containing protein kinase family protein
MSTRG.1549.2	MSTRG.1549	AUR62021125	AUR62021125-RA	Chr00	34864264	34868666	n	U-box domain-containing protein kinase family protein
MSTRG.1550.1	MSTRG.1550	AUR62021126	AUR62021126-RA	Chr00	34863875	34872631	k	septum site-determining protein (MIND)
MSTRG.1550.2	MSTRG.1550	AUR62021126	AUR62021126-RA	Chr00	34863945	34872631	k	septum site-determining protein (MIND)
AUR62021126-RA	MSTRG.1550	AUR62021126	AUR62021126-RA	Chr00	34871385	34872631	=	septum site-determining protein (MIND)
MSTRG.1551.1	MSTRG.1551	AUR62021125	AUR62021125-RA	Chr00	34867000	34867710	x	U-box domain-containing protein kinase family protein
MSTRG.1552.1	MSTRG.1552	AUR62021125	AUR62021125-RA	Chr00	34868205	34868611	x	U-box domain-containing protein kinase family protein
MSTRG.1553.1	MSTRG.1553	AUR62021126	AUR62021126-RA	Chr00	34871124	34872761	x	septum site-determining protein (MIND)
MSTRG.1554.1	MSTRG.1554	-	-	Chr00	34893083	34893401	u	-
MSTRG.1555.1	MSTRG.1555	-	-	Chr00	34893694	34894007	u	-
MSTRG.1556.1	MSTRG.1556	-	-	Chr00	34895092	34895651	u	-
MSTRG.1557.1	MSTRG.1557	AUR62021127	AUR62021127-RA	Chr00	34881566	34884938	k	unknown protein; BEST Arabidopsis thaliana protein match is: unknown protein (TAIR:AT4G25670.2); Has 35333 Blast hits to 34131 proteins in 2444 species: Archae - 798; Bacteria - 22429; Metazoa - 974; Fungi - 991; Plants - 531; Viruses - 0; Other Eukaryotes - 9610 (source: NCBI BLink).
MSTRG.1557.2	MSTRG.1557	AUR62021127	AUR62021127-RA	Chr00	34881566	34884938	k	unknown protein; BEST Arabidopsis thaliana protein match is: unknown protein (TAIR:AT4G25670.2); Has 35333 Blast hits to 34131 proteins in 2444 species: Archae - 798; Bacteria - 22429; Metazoa - 974; Fungi - 991; Plants - 531; Viruses - 0; Other Eukaryotes - 9610 (source: NCBI BLink).
AUR62021127-RA	MSTRG.1557	AUR62021127	AUR62021127-RA	Chr00	34883429	34884938	k	unknown protein; BEST Arabidopsis thaliana protein match is: unknown protein (TAIR:AT4G25670.2); Has 35333 Blast hits to 34131 proteins in 2444 species: Archae - 798; Bacteria - 22429; Metazoa - 974; Fungi - 991; Plants - 531; Viruses - 0; Other Eukaryotes - 9610 (source: NCBI BLink).
AUR62021128-RA	MSTRG.1558	AUR62021128	AUR62021128-RA	Chr00	34885452	34890185	=	PPPDE putative thiol peptidase family protein
MSTRG.1559.1	MSTRG.1559	-	-	Chr00	34900606	34901414	u	-
MSTRG.1560.1	MSTRG.1560	AUR62021130	AUR62021130-RA	Chr00	34901471	34908270	k	Protein kinase superfamily protein
AUR62021130-RA	MSTRG.1560	AUR62021130	AUR62021130-RA	Chr00	34905597	34908270	=	Protein kinase superfamily protein
AUR62021129-RA	MSTRG.1561	AUR62021129	AUR62021129-RA	Chr00	34901656	34904260	=	NF-X-like 1
MSTRG.1561.2	MSTRG.1561	AUR62021131	AUR62021131-RA	Chr00	34902048	34916472	o	NF-X-like 1
MSTRG.1561.3	MSTRG.1561	AUR62021129	AUR62021129-RA	Chr00	34902920	34904260	n	NF-X-like 1
MSTRG.1561.4	MSTRG.1561	AUR62021131	AUR62021131-RA	Chr00	34911469	34916771	k	NF-X-like 1
MSTRG.1561.5	MSTRG.1561	AUR62021132	AUR62021132-RA	Chr00	34911498	34919317	j	NF-X-like 1
AUR62021131-RA	MSTRG.1561	AUR62021131	AUR62021131-RA	Chr00	34913041	34916472	=	NF-X-like 1
AUR62021132-RA	MSTRG.1561	AUR62021132	AUR62021132-RA	Chr00	34918079	34934962	=	Protein of unknown function (DUF819)
MSTRG.1561.8	MSTRG.1561	AUR62021132	AUR62021132-RA	Chr00	34920944	34934962	n	Protein of unknown function (DUF819)
MSTRG.1562.1	MSTRG.1562	-	-	Chr00	34909164	34909450	u	-
MSTRG.1563.1	MSTRG.1563	AUR62021131	AUR62021131-RA	Chr00	34912933	34916466	x	NF-X-like 1
MSTRG.1564.1	MSTRG.1564	AUR62021131	AUR62021131-RA	Chr00	34917442	34917768	p	-
MSTRG.1565.1	MSTRG.1565	AUR62021132	AUR62021132-RA	Chr00	34923814	34924146	i	-
MSTRG.1566.1	MSTRG.1566	AUR62021132	AUR62021132-RA	Chr00	34924393	34924972	i	-
AUR62021133-RA	MSTRG.1567	AUR62021133	AUR62021133-RA	Chr00	34933774	34934525	=	germin-like protein subfamily 2 member 2 precursor
MSTRG.1568.1	MSTRG.1568	AUR62021134	AUR62021134-RA	Chr00	34935415	34944401	n	ferric reduction oxidase 2
MSTRG.1568.2	MSTRG.1568	-	-	Chr00	34935452	34939028	u	Protein of unknown function (DUF819)
MSTRG.1568.3	MSTRG.1568	AUR62021134	AUR62021134-RA	Chr00	34939191	34944401	k	ferric reduction oxidase 5
AUR62021134-RA	MSTRG.1568	AUR62021134	AUR62021134-RA	Chr00	34939705	34944401	=	ferric reduction oxidase 5
MSTRG.1569.1	MSTRG.1569	AUR62021134	AUR62021134-RA	Chr00	34940677	34940900	i	ferric reduction oxidase 4
MSTRG.1570.1	MSTRG.1570	-	-	Chr00	34969070	34969334	u	-
MSTRG.1571.1	MSTRG.1571	-	-	Chr00	34967155	34967895	u	-
MSTRG.1572.1	MSTRG.1572	-	-	Chr00	34968083	34968583	u	-
AUR62021135-RA	MSTRG.1573	AUR62021135	AUR62021135-RA	Chr00	34950546	34960481	=	ferric reduction oxidase 4
MSTRG.1573.2	MSTRG.1573	AUR62021135	AUR62021135-RA	Chr00	34954201	34954482	n	-
MSTRG.1573.3	MSTRG.1573	AUR62021135	AUR62021135-RA	Chr00	34955790	34960481	j	ferric reduction oxidase 4
MSTRG.1574.1	MSTRG.1574	AUR62021135	AUR62021135-RA	Chr00	34955676	34956031	x	ferric reduction oxidase 4
MSTRG.1575.1	MSTRG.1575	AUR62021135	AUR62021135-RA	Chr00	34958073	34958771	x	ferric reduction oxidase 2
MSTRG.1576.1	MSTRG.1576	-	-	Chr00	34981560	34981870	u	-
MSTRG.1577.1	MSTRG.1577	AUR62021136	AUR62021136-RA	Chr00	34977188	34978392	j	germin-like protein subfamily 2 member 2 precursor
AUR62021136-RA	MSTRG.1577	AUR62021136	AUR62021136-RA	Chr00	34977263	34978392	=	germin-like protein 10
AUR62021137-RA	MSTRG.1578	AUR62021137	AUR62021137-RA	Chr00	34978536	34980573	=	-
MSTRG.1579.1	MSTRG.1579	-	-	Chr00	35008509	35009406	u	-
MSTRG.1580.1	MSTRG.1580	AUR62021138	AUR62021138-RA	Chr00	34984064	34987234	m	SCARECROW-like 8
AUR62021138-RA	MSTRG.1580	AUR62021138	AUR62021138-RA	Chr00	34984658	34987234	=	SCARECROW-like 8
MSTRG.1581.1	MSTRG.1581	-	-	Chr00	35011276	35011686	u	-
MSTRG.1582.1	MSTRG.1582	-	-	Chr00	35014896	35015420	u	-
MSTRG.1583.1	MSTRG.1583	-	-	Chr00	35019611	35019863	u	-
MSTRG.1584.1	MSTRG.1584	AUR62021139	AUR62021139-RA	Chr00	35034210	35034425	p	detoxifying efflux carrier 35
AUR62021140-RA	MSTRG.1585	AUR62021140	AUR62021140-RA	Chr00	35034595	35035824	=	F-box family protein with a domain of unknown function (DUF295)
AUR62021139-RA	MSTRG.1586	AUR62021139	AUR62021139-RA	Chr00	35026575	35033529	=	detoxifying efflux carrier 35
AUR62021142-RA	MSTRG.1587	AUR62021142	AUR62021142-RA	Chr00	35042093	35045930	=	fibrillarin 2
MSTRG.1587.2	MSTRG.1587	AUR62021142	AUR62021142-RA	Chr00	35042144	35045930	j	fibrillarin 2
MSTRG.1587.3	MSTRG.1587	AUR62021142	AUR62021142-RA	Chr00	35042144	35045930	j	fibrillarin 2
MSTRG.1588.1	MSTRG.1588	AUR62021143	AUR62021143-RA	Chr00	35046992	35048208	p	Calcium-dependent lipid-binding (CaLB domain) family protein
MSTRG.1589.1	MSTRG.1589	AUR62021143	AUR62021143-RA	Chr00	35049078	35049351	p	-
MSTRG.1590.1	MSTRG.1590	AUR62021143	AUR62021143-RA	Chr00	35049923	35051165	x	Calcium-dependent lipid-binding (CaLB domain) family protein
AUR62021143-RA	MSTRG.1591	AUR62021143	AUR62021143-RA	Chr00	35050133	35051074	=	Calcium-dependent lipid-binding (CaLB domain) family protein
MSTRG.1592.1	MSTRG.1592	-	-	Chr00	35067101	35067458	u	-
MSTRG.1593.1	MSTRG.1593	-	-	Chr00	35067940	35068347	u	-
MSTRG.1594.1	MSTRG.1594	AUR62021144	AUR62021144-RA	Chr00	35055165	35061104	k	Protein of unknown function (DUF677)
AUR62021144-RA	MSTRG.1594	AUR62021144	AUR62021144-RA	Chr00	35060718	35061104	=	Protein of unknown function (DUF677)
MSTRG.1595.1	MSTRG.1595	-	-	Chr00	35058010	35058275	u	-
AUR62021145-RA	MSTRG.1596	AUR62021145	AUR62021145-RA	Chr00	35075749	35079351	=	HXXXD-type acyl-transferase family protein
AUR62021146-RA	MSTRG.1597	AUR62021146	AUR62021146-RA	Chr00	35079997	35086834	=	Methyltransferase MT-A70 family protein
MSTRG.1597.2	MSTRG.1597	AUR62021146	AUR62021146-RA	Chr00	35080033	35087585	m	Methyltransferase MT-A70 family protein
MSTRG.1597.3	MSTRG.1597	AUR62021146	AUR62021146-RA	Chr00	35080049	35087585	m	Methyltransferase MT-A70 family protein
MSTRG.1597.4	MSTRG.1597	AUR62021146	AUR62021146-RA	Chr00	35080131	35087206	j	Methyltransferase MT-A70 family protein
MSTRG.1598.1	MSTRG.1598	AUR62021146	AUR62021146-RA	Chr00	35084095	35086558	x	Methyltransferase MT-A70 family protein
MSTRG.1599.1	MSTRG.1599	-	-	Chr00	35103189	35103419	u	-
MSTRG.1600.1	MSTRG.1600	-	-	Chr00	35106018	35106759	u	-
AUR62021147-RA	MSTRG.1601	AUR62021147	AUR62021147-RA	Chr00	35088066	35096404	=	zinc ion binding;nucleic acid binding;hydrolases, acting on acid anhydrides, in phosphorus-containing anhydrides
MSTRG.1601.2	MSTRG.1601	AUR62021147	AUR62021147-RA	Chr00	35089161	35091069	j	zinc ion binding;nucleic acid binding;hydrolases, acting on acid anhydrides, in phosphorus-containing anhydrides
AUR62021148-RA	MSTRG.1602	AUR62021148	AUR62021148-RA	Chr00	35097158	35101648	=	Bacterial sec-independent translocation protein mttA/Hcf106
MSTRG.1603.1	MSTRG.1603	AUR62021149	AUR62021149-RA	Chr00	35107842	35119562	j	Divalent ion symporter
AUR62021149-RA	MSTRG.1603	AUR62021149	AUR62021149-RA	Chr00	35107842	35118607	=	Pyruvate kinase family protein
MSTRG.1603.3	MSTRG.1603	AUR62021149	AUR62021149-RA	Chr00	35113824	35119562	j	Divalent ion symporter
MSTRG.1604.1	MSTRG.1604	AUR62021149	AUR62021149-RA	Chr00	35110377	35111375	x	hydroxyproline-rich glycoprotein family protein
MSTRG.1605.1	MSTRG.1605	AUR62021149	AUR62021149-RA	Chr00	35113128	35113343	i	-
MSTRG.1606.1	MSTRG.1606	AUR62021149	AUR62021149-RA	Chr00	35115001	35115372	x	Divalent ion symporter
MSTRG.1607.1	MSTRG.1607	-	-	Chr00	35119060	35119373	u	Divalent ion symporter
MSTRG.1608.1	MSTRG.1608	AUR62021152	AUR62021152-RA	Chr00	35137351	35137713	p	-
MSTRG.1609.1	MSTRG.1609	AUR62021152	AUR62021152-RA	Chr00	35138005	35138269	p	-
MSTRG.1610.1	MSTRG.1610	AUR62021151	AUR62021151-RA	Chr00	35130595	35134485	j	NAD(P)-binding Rossmann-fold superfamily protein
AUR62021151-RA	MSTRG.1610	AUR62021151	AUR62021151-RA	Chr00	35130643	35134485	=	NAD(P)-binding Rossmann-fold superfamily protein
MSTRG.1611.1	MSTRG.1611	AUR62021150	AUR62021150-RA	Chr00	35122101	35130348	j	Protein kinase superfamily protein
MSTRG.1611.2	MSTRG.1611	AUR62021150	AUR62021150-RA	Chr00	35122126	35130348	j	Protein kinase superfamily protein
AUR62021150-RA	MSTRG.1611	AUR62021150	AUR62021150-RA	Chr00	35122414	35130348	=	Protein kinase superfamily protein
MSTRG.1612.1	MSTRG.1612	AUR62021150	AUR62021150-RA	Chr00	35125199	35125669	x	Protein kinase superfamily protein
MSTRG.1613.1	MSTRG.1613	AUR62021150	AUR62021150-RA	Chr00	35129122	35130349	x	-
MSTRG.1614.1	MSTRG.1614	-	-	Chr00	35148798	35149108	u	-
AUR62021152-RA	MSTRG.1615	AUR62021152	AUR62021152-RA	Chr00	35139492	35148213	=	NAD(P)-binding Rossmann-fold superfamily protein
MSTRG.1615.2	MSTRG.1615	AUR62021152	AUR62021152-RA	Chr00	35139547	35143481	j	NAD(P)-binding Rossmann-fold superfamily protein
MSTRG.1615.3	MSTRG.1615	AUR62021152	AUR62021152-RA	Chr00	35139564	35143481	j	NAD(P)-binding Rossmann-fold superfamily protein
MSTRG.1616.1	MSTRG.1616	AUR62021152	AUR62021152-RA	Chr00	35143849	35144204	i	-
MSTRG.1617.1	MSTRG.1617	AUR62021152	AUR62021152-RA	Chr00	35144330	35147382	i	NAD(P)-binding Rossmann-fold superfamily protein
MSTRG.1618.1	MSTRG.1618	AUR62021153	AUR62021153-RA	Chr00	35150525	35150864	x	-
[truncated: 232,389+ more rows]
