# Supplementary material for: Transcriptome dynamics uncovers long non-coding RNAs response to salinity stress in Chenopodium quinoa
Source: Front Plant Sci. 2022 Sep 20;13:988845. doi: 10.3389/fpls.2022.988845 (PMC9530330; doi:10.3389/fpls.2022.988845)
Supplement: Supplementary file 3 [file Table_3.XLSX]

## Sheet: Sheet1
Table S3 The information of candidate LncRNAs.
Transcript_id	qry_gene_id	Chr	Start	End	class_code	Length	CPC_score	CPC_coding	LncRNA
MSTRG.1.1	MSTRG.1	Chr00	142149	142481	u	333	0.0116493	noncoding	LncRNA
MSTRG.2.1	MSTRG.2	Chr00	156267	156629	u	363	0.121893	noncoding	LncRNA
MSTRG.3.1	MSTRG.3	Chr00	188061	188508	u	448	0.0114194	noncoding	LncRNA
MSTRG.4.1	MSTRG.4	Chr00	155282	155670	u	389	0.00672154	noncoding	LncRNA
MSTRG.5.1	MSTRG.5	Chr00	148480	148956	u	477	0.073562	noncoding	LncRNA
MSTRG.6.1	MSTRG.6	Chr00	192240	192637	u	398	1.44553e-05	noncoding	LncRNA
MSTRG.7.1	MSTRG.7	Chr00	166259	166524	u	266	0.0172141	noncoding	LncRNA
MSTRG.8.1	MSTRG.8	Chr00	163844	164295	u	452	0.00815679	noncoding	LncRNA
MSTRG.9.1	MSTRG.9	Chr00	181983	182475	u	493	0.0134698	noncoding	LncRNA
MSTRG.10.1	MSTRG.10	Chr00	194464	194800	u	337	0.0197455	noncoding	LncRNA
MSTRG.11.1	MSTRG.11	Chr00	206444	206701	u	258	8.59316e-06	noncoding	LncRNA
MSTRG.12.1	MSTRG.12	Chr00	166891	174378	j	1523	1	coding	/
AUR62043415-RA	MSTRG.12	Chr00	167142	174378	=	976	0.999996	coding	/
MSTRG.12.3	MSTRG.12	Chr00	168840	174378	j	553	0.116412	noncoding	LncRNA
MSTRG.13.1	MSTRG.13	Chr00	170721	171391	i	671	0.0226341	noncoding	LncRNA
MSTRG.14.1	MSTRG.14	Chr00	234859	235220	u	362	0.012921	noncoding	LncRNA
MSTRG.15.1	MSTRG.15	Chr00	261830	262118	u	289	0.0372978	noncoding	LncRNA
MSTRG.16.1	MSTRG.16	Chr00	212712	225214	j	2760	1	coding	/
AUR62043416-RA	MSTRG.16	Chr00	213145	226846	=	2428	1	coding	/
MSTRG.16.3	MSTRG.16	Chr00	213313	225214	j	2678	1	coding	/
MSTRG.17.1	MSTRG.17	Chr00	440138	440398	u	261	0.0582503	noncoding	LncRNA
MSTRG.18.1	MSTRG.18	Chr00	378671	379021	u	351	0.0161035	noncoding	LncRNA
MSTRG.19.1	MSTRG.19	Chr00	263916	264259	u	344	0.0074949	noncoding	LncRNA
MSTRG.20.1	MSTRG.20	Chr00	257294	260446	j	1603	0.99828	coding	/
AUR62043421-RA	MSTRG.20	Chr00	257294	259473	=	1152	0.999742	coding	/
MSTRG.20.3	MSTRG.20	Chr00	257331	260446	j	1505	0.617678	coding	/
MSTRG.20.4	MSTRG.20	Chr00	259242	260446	j	633	0.0174908	noncoding	LncRNA
MSTRG.21.1	MSTRG.21	Chr00	568763	569053	u	291	0.0205116	noncoding	LncRNA
MSTRG.22.1	MSTRG.22	Chr00	625563	628247	m	2685	0.999978	coding	/
AUR62044361-RA	MSTRG.22	Chr00	626700	628247	=	1396	1	coding	/
MSTRG.23.1	MSTRG.23	Chr00	652405	655981	u	1054	0.144654	noncoding	LncRNA
MSTRG.24.1	MSTRG.24	Chr00	630987	631582	x	596	0.0186769	noncoding	LncRNA
AUR62044362-RA	MSTRG.25	Chr00	631358	640712	=	492	0.842518	coding	/
MSTRG.25.2	MSTRG.25	Chr00	632560	632965	i	406	0.0244014	noncoding	LncRNA
MSTRG.25.3	MSTRG.25	Chr00	639234	640712	j	663	0.0301933	noncoding	LncRNA
MSTRG.26.1	MSTRG.26	Chr00	705690	706047	u	358	0.0138088	noncoding	LncRNA
MSTRG.27.1	MSTRG.27	Chr00	893354	894367	u	1014	0.0436388	noncoding	LncRNA
AUR62044736-RA	MSTRG.28	Chr00	907289	909177	=	1260	1	coding	/
MSTRG.29.1	MSTRG.29	Chr00	922844	923105	u	262	0.00549319	noncoding	LncRNA
MSTRG.30.1	MSTRG.30	Chr00	925613	926506	u	894	0.0161418	noncoding	LncRNA
MSTRG.31.1	MSTRG.31	Chr00	933239	933716	u	478	0.0152259	noncoding	LncRNA
MSTRG.32.1	MSTRG.32	Chr00	1088835	1089187	u	353	0.0346437	noncoding	LncRNA
MSTRG.33.1	MSTRG.33	Chr00	1093691	1094040	u	350	0.00769754	noncoding	LncRNA
MSTRG.34.1	MSTRG.34	Chr00	1256588	1256874	u	287	0.0082009	noncoding	LncRNA
MSTRG.35.1	MSTRG.35	Chr00	1292069	1292416	u	348	0.0896746	noncoding	LncRNA
MSTRG.36.1	MSTRG.36	Chr00	1304028	1304387	u	360	0.0461283	noncoding	LncRNA
MSTRG.37.1	MSTRG.37	Chr00	1308136	1308551	u	416	0.0223761	noncoding	LncRNA
MSTRG.38.1	MSTRG.38	Chr00	1310463	1310740	u	278	0.0109237	noncoding	LncRNA
MSTRG.39.1	MSTRG.39	Chr00	1491034	1491360	u	327	0.0324983	noncoding	LncRNA
MSTRG.40.1	MSTRG.40	Chr00	1397225	1397533	u	309	0.00782615	noncoding	LncRNA
MSTRG.41.1	MSTRG.41	Chr00	1488057	1488560	u	504	0.0260399	noncoding	LncRNA
MSTRG.42.1	MSTRG.42	Chr00	1611725	1612031	u	307	0.00327496	noncoding	LncRNA
MSTRG.43.1	MSTRG.43	Chr00	1649310	1649718	u	409	0.105001	noncoding	LncRNA
AUR62044180-RA	MSTRG.44	Chr00	1497593	1502796	=	2160	1	coding	/
MSTRG.45.1	MSTRG.45	Chr00	1502358	1502566	i	209	0.00342358	noncoding	LncRNA
MSTRG.46.1	MSTRG.46	Chr00	1657565	1658932	u	1368	0.114639	noncoding	LncRNA
MSTRG.47.1	MSTRG.47	Chr00	1756914	1757386	u	473	0.145527	noncoding	LncRNA
MSTRG.48.1	MSTRG.48	Chr00	1810576	1810793	u	218	0.0535426	noncoding	LncRNA
MSTRG.49.1	MSTRG.49	Chr00	1817253	1817458	u	206	0.0333642	noncoding	LncRNA
MSTRG.50.1	MSTRG.50	Chr00	1814388	1815018	u	631	0.0223304	noncoding	LncRNA
MSTRG.51.1	MSTRG.51	Chr00	1815192	1815436	u	245	0.00533383	noncoding	LncRNA
AUR62044009-RA	MSTRG.52	Chr00	1797204	1801946	=	412	0.00656108	noncoding	LncRNA
MSTRG.52.2	MSTRG.52	Chr00	1797209	1805066	j	1074	0.316069	noncoding	LncRNA
MSTRG.53.1	MSTRG.53	Chr00	1900967	1901328	u	362	0.0753764	noncoding	LncRNA
MSTRG.54.1	MSTRG.54	Chr00	2006737	2007526	u	790	0.0604334	noncoding	LncRNA
MSTRG.55.1	MSTRG.55	Chr00	1823836	1824041	u	206	0.0333642	noncoding	LncRNA
MSTRG.56.1	MSTRG.56	Chr00	1821301	1822007	u	707	0.0550948	noncoding	LncRNA
MSTRG.57.1	MSTRG.57	Chr00	2061923	2062282	p	360	0.00453437	noncoding	LncRNA
MSTRG.58.1	MSTRG.58	Chr00	2064772	2065015	u	244	0.00704176	noncoding	LncRNA
MSTRG.59.1	MSTRG.59	Chr00	2065835	2066094	u	260	0.00939743	noncoding	LncRNA
MSTRG.60.1	MSTRG.60	Chr00	2057631	2061026	j	1218	0.119682	noncoding	LncRNA
AUR62044154-RA	MSTRG.60	Chr00	2057709	2061026	=	1100	0.0890065	noncoding	LncRNA
MSTRG.61.1	MSTRG.61	Chr00	2060037	2060733	x	697	0.179559	noncoding	LncRNA
MSTRG.62.1	MSTRG.62	Chr00	2176219	2176838	u	620	0.00865783	noncoding	LncRNA
AUR62044155-RA	MSTRG.63	Chr00	2067092	2075794	=	1260	0.999757	coding	/
MSTRG.64.1	MSTRG.64	Chr00	2067988	2068789	x	802	0.01576	noncoding	LncRNA
MSTRG.65.1	MSTRG.65	Chr00	2072172	2072772	i	601	0.0285396	noncoding	LncRNA
MSTRG.66.1	MSTRG.66	Chr00	2470770	2471064	u	295	0.00695715	noncoding	LncRNA
MSTRG.67.1	MSTRG.67	Chr00	2433238	2433524	u	287	0.00581409	noncoding	LncRNA
MSTRG.68.1	MSTRG.68	Chr00	2446886	2447208	u	323	0.00625746	noncoding	LncRNA
MSTRG.69.1	MSTRG.69	Chr00	2185267	2185572	u	306	0.0110937	noncoding	LncRNA
MSTRG.70.1	MSTRG.70	Chr00	2477286	2478256	u	971	0.0348732	noncoding	LncRNA
MSTRG.71.1	MSTRG.71	Chr00	2560315	2560811	u	497	0.162323	noncoding	LncRNA
MSTRG.72.1	MSTRG.72	Chr00	2564988	2567770	u	234	0.0156794	noncoding	LncRNA
MSTRG.73.1	MSTRG.73	Chr00	2568150	2568390	u	241	0.0115721	noncoding	LncRNA
MSTRG.74.1	MSTRG.74	Chr00	2574471	2574780	u	310	0.0182651	noncoding	LncRNA
MSTRG.75.1	MSTRG.75	Chr00	2578172	2579045	p	874	0.248275	noncoding	LncRNA
MSTRG.76.1	MSTRG.76	Chr00	2595144	2595911	u	768	0.0569004	noncoding	LncRNA
MSTRG.77.1	MSTRG.77	Chr00	2752995	2753907	m	913	0.941504	coding	/
AUR62044421-RA	MSTRG.77	Chr00	2753038	2753907	=	748	0.391405	noncoding	LncRNA
MSTRG.78.1	MSTRG.78	Chr00	2755171	2755727	x	557	0.0248038	noncoding	LncRNA
AUR62044422-RA	MSTRG.79	Chr00	2755529	2756135	=	507	0.981255	coding	/
MSTRG.80.1	MSTRG.80	Chr00	2784907	2785312	u	406	0.173001	noncoding	LncRNA
MSTRG.81.1	MSTRG.81	Chr00	2848381	2848657	u	277	8.2423e-06	noncoding	LncRNA
AUR62044423-RA	MSTRG.82	Chr00	2756750	2761070	=	1917	1	coding	/
MSTRG.83.1	MSTRG.83	Chr00	2758078	2759254	x	1177	0.113603	noncoding	LncRNA
MSTRG.84.1	MSTRG.84	Chr00	2861711	2862016	u	306	0.0675218	noncoding	LncRNA
MSTRG.85.1	MSTRG.85	Chr00	2870253	2870480	u	228	0.116478	noncoding	LncRNA
MSTRG.86.1	MSTRG.86	Chr00	2957941	2958385	u	445	0.0456081	noncoding	LncRNA
AUR62044194-RA	MSTRG.87	Chr00	3104581	3110363	=	1232	1	coding	/
MSTRG.87.2	MSTRG.87	Chr00	3108633	3110363	j	889	0.99711	coding	/
MSTRG.87.3	MSTRG.87	Chr00	3108633	3110363	j	848	0.0255312	noncoding	LncRNA
MSTRG.88.1	MSTRG.88	Chr00	3119396	3119721	u	326	0.00829508	noncoding	LncRNA
MSTRG.89.1	MSTRG.89	Chr00	3121375	3121663	u	289	0.018401	noncoding	LncRNA
MSTRG.90.1	MSTRG.90	Chr00	3122161	3122673	u	513	0.00687562	noncoding	LncRNA
MSTRG.91.1	MSTRG.91	Chr00	3113395	3115940	j	1023	0.996947	coding	/
AUR62044195-RA	MSTRG.91	Chr00	3114747	3115940	=	902	0.994305	coding	/
MSTRG.92.1	MSTRG.92	Chr00	3141273	3141605	u	333	0.0089117	noncoding	LncRNA
MSTRG.93.1	MSTRG.93	Chr00	3137357	3138608	j	955	0.99693	coding	/
AUR62044196-RA	MSTRG.93	Chr00	3137357	3138608	=	960	0.996519	coding	/
MSTRG.94.1	MSTRG.94	Chr00	3137612	3138451	x	840	0.243272	noncoding	LncRNA
MSTRG.95.1	MSTRG.95	Chr00	3142050	3142446	u	397	0.012198	noncoding	LncRNA
MSTRG.96.1	MSTRG.96	Chr00	3170390	3170869	u	480	0.0347693	noncoding	LncRNA
MSTRG.97.1	MSTRG.97	Chr00	3271893	3272519	u	627	0.0520316	noncoding	LncRNA
MSTRG.98.1	MSTRG.98	Chr00	3275094	3275587	u	494	0.0198956	noncoding	LncRNA
MSTRG.99.1	MSTRG.99	Chr00	3324090	3330459	u	332	0.00401111	noncoding	LncRNA
MSTRG.100.1	MSTRG.100	Chr00	3324450	3330686	u	232	0.0200442	noncoding	LncRNA
MSTRG.101.1	MSTRG.101	Chr00	3411327	3411773	u	447	0.151675	noncoding	LncRNA
MSTRG.102.1	MSTRG.102	Chr00	3412859	3413315	u	457	0.0151344	noncoding	LncRNA
MSTRG.103.1	MSTRG.103	Chr00	3415144	3415480	u	337	0.0203524	noncoding	LncRNA
MSTRG.104.1	MSTRG.104	Chr00	3479818	3480312	u	495	0.00599499	noncoding	LncRNA
MSTRG.105.1	MSTRG.105	Chr00	3482813	3483114	u	302	0.0125545	noncoding	LncRNA
MSTRG.106.1	MSTRG.106	Chr00	3495242	3495821	u	580	0.972533	coding	/
MSTRG.107.1	MSTRG.107	Chr00	3485498	3488566	u	1642	1	coding	/
MSTRG.108.1	MSTRG.108	Chr00	3641288	3641658	u	371	0.00785024	noncoding	LncRNA
MSTRG.109.1	MSTRG.109	Chr00	3650922	3651590	u	669	0.510354	coding	/
MSTRG.110.1	MSTRG.110	Chr00	3664106	3664403	u	298	0.100881	noncoding	LncRNA
MSTRG.111.1	MSTRG.111	Chr00	3668888	3669120	u	233	0.00578327	noncoding	LncRNA
MSTRG.112.1	MSTRG.112	Chr00	3828848	3829611	u	764	0.0302086	noncoding	LncRNA
MSTRG.113.1	MSTRG.113	Chr00	3511088	3535419	u	6322	0.119549	noncoding	LncRNA
MSTRG.113.2	MSTRG.113	Chr00	3511338	3522122	u	1759	0.0279428	noncoding	LncRNA
MSTRG.113.3	MSTRG.113	Chr00	3511719	3524422	u	3683	0.119549	noncoding	LncRNA
MSTRG.113.4	MSTRG.113	Chr00	3511720	3525926	u	5191	0.125165	noncoding	LncRNA
MSTRG.113.5	MSTRG.113	Chr00	3511720	3522122	u	1375	0.0274835	noncoding	LncRNA
MSTRG.113.6	MSTRG.113	Chr00	3512910	3533691	u	2760	0.132174	noncoding	LncRNA
MSTRG.113.7	MSTRG.113	Chr00	3512953	3540375	u	402	0.0356097	noncoding	LncRNA
MSTRG.113.8	MSTRG.113	Chr00	3515465	3534029	u	542	0.0146308	noncoding	LncRNA
MSTRG.113.9	MSTRG.113	Chr00	3524685	3534029	u	342	0.0117491	noncoding	LncRNA
MSTRG.113.10	MSTRG.113	Chr00	3529749	3540375	u	1640	0.0310097	noncoding	LncRNA
MSTRG.114.1	MSTRG.114	Chr00	3511717	3531093	u	1345	0.0423451	noncoding	LncRNA
MSTRG.114.2	MSTRG.114	Chr00	3511720	3532663	u	2914	0.120339	noncoding	LncRNA
MSTRG.114.3	MSTRG.114	Chr00	3511720	3522595	u	1846	0.0119929	noncoding	LncRNA
MSTRG.114.4	MSTRG.114	Chr00	3519952	3531212	u	2257	0.104185	noncoding	LncRNA
MSTRG.114.5	MSTRG.114	Chr00	3520737	3541257	u	2527	0.739388	coding	/
MSTRG.115.1	MSTRG.115	Chr00	3514782	3533692	u	886	0.0624269	noncoding	LncRNA
MSTRG.115.2	MSTRG.115	Chr00	3524170	3533692	u	519	0.0937788	noncoding	LncRNA
MSTRG.115.3	MSTRG.115	Chr00	3524189	3533692	u	501	0.0611887	noncoding	LncRNA
MSTRG.116.1	MSTRG.116	Chr00	3917533	3922354	j	1106	0.0945545	noncoding	LncRNA
AUR62043775-RA	MSTRG.116	Chr00	3917554	3921796	=	685	0.189067	noncoding	LncRNA
AUR62043776-RA	MSTRG.117	Chr00	3925594	3932291	=	2820	1	coding	/
MSTRG.118.1	MSTRG.118	Chr00	4133696	4134218	u	523	0.0393522	noncoding	LncRNA
MSTRG.119.1	MSTRG.119	Chr00	4390112	4390836	u	725	0.087528	noncoding	LncRNA
AUR62043777-RA	MSTRG.120	Chr00	3943563	3949337	=	2250	1	coding	/
MSTRG.121.1	MSTRG.121	Chr00	3949015	3949267	x	253	0.0534662	noncoding	LncRNA
MSTRG.122.1	MSTRG.122	Chr00	4445522	4445927	u	406	0.0427475	noncoding	LncRNA
MSTRG.123.1	MSTRG.123	Chr00	4446942	4448812	u	1871	0.5	coding	/
MSTRG.124.1	MSTRG.124	Chr00	4460702	4461426	u	725	0.305899	noncoding	LncRNA
MSTRG.125.1	MSTRG.125	Chr00	4462069	4464116	u	2048	0.512737	coding	/
MSTRG.126.1	MSTRG.126	Chr00	4643379	4644105	u	727	0.0886505	noncoding	LncRNA
MSTRG.127.1	MSTRG.127	Chr00	5189484	5189760	u	277	0.00362455	noncoding	LncRNA
MSTRG.128.1	MSTRG.128	Chr00	5176290	5178866	j	1742	0.997396	coding	/
AUR62044328-RA	MSTRG.128	Chr00	5177404	5178866	=	1344	0.982342	coding	/
AUR62044325-RA	MSTRG.129	Chr00	5145652	5148459	=	255	0.423712	noncoding	LncRNA
MSTRG.130.1	MSTRG.130	Chr00	5158392	5160837	j	1610	0.994311	coding	/
AUR62044326-RA	MSTRG.130	Chr00	5159286	5161706	=	2241	1	coding	/
AUR62044327-RA	MSTRG.131	Chr00	5163744	5166548	=	255	0.423712	noncoding	LncRNA
MSTRG.132.1	MSTRG.132	Chr00	5173187	5173676	u	341	0.0985491	noncoding	LncRNA
MSTRG.133.1	MSTRG.133	Chr00	5362345	5362759	u	415	0.0173059	noncoding	LncRNA
MSTRG.134.1	MSTRG.134	Chr00	5365949	5366742	u	794	0.718311	coding	/
MSTRG.135.1	MSTRG.135	Chr00	5367165	5367629	u	465	0.00808923	noncoding	LncRNA
MSTRG.136.1	MSTRG.136	Chr00	5370468	5370849	u	382	0.0029007	noncoding	LncRNA
MSTRG.137.1	MSTRG.137	Chr00	5378566	5378827	u	262	0.00348618	noncoding	LncRNA
MSTRG.138.1	MSTRG.138	Chr00	5371972	5372730	u	759	0.308392	noncoding	LncRNA
MSTRG.139.1	MSTRG.139	Chr00	5379932	5380737	u	806	0.709102	coding	/
MSTRG.140.1	MSTRG.140	Chr00	5379954	5394697	u	764	0.0747055	noncoding	LncRNA
MSTRG.141.1	MSTRG.141	Chr00	5385405	5400675	u	1288	0.026199	noncoding	LncRNA
MSTRG.142.1	MSTRG.142	Chr00	5393847	5394956	u	1110	0.718578	coding	/
MSTRG.143.1	MSTRG.143	Chr00	5506527	5517056	k	1797	0.999206	coding	/
MSTRG.143.2	MSTRG.143	Chr00	5506527	5514115	j	1218	0.0308345	noncoding	LncRNA
MSTRG.143.3	MSTRG.143	Chr00	5506528	5514115	j	1241	0.0485648	noncoding	LncRNA
AUR62044101-RA	MSTRG.143	Chr00	5509928	5514015	=	562	0.990133	coding	/
AUR62044102-RA	MSTRG.143	Chr00	5514016	5517056	=	651	0.999706	coding	/
MSTRG.144.1	MSTRG.144	Chr00	5523562	5531561	k	2893	1	coding	/
AUR62044103-RA	MSTRG.144	Chr00	5523875	5531364	=	2505	1	coding	/
MSTRG.144.3	MSTRG.144	Chr00	5525398	5527631	j	2059	0.999998	coding	/
MSTRG.145.1	MSTRG.145	Chr00	5529357	5531844	x	2488	0.024561	noncoding	LncRNA
AUR62043986-RA	MSTRG.146	Chr00	5582212	5595373	=	4735	1	coding	/
MSTRG.146.2	MSTRG.146	Chr00	5584768	5591850	n	5615	1	coding	/
MSTRG.146.3	MSTRG.146	Chr00	5587134	5591373	n	2250	1	coding	/
MSTRG.147.1	MSTRG.147	Chr00	5592019	5593399	i	594	0.0413158	noncoding	LncRNA
MSTRG.148.1	MSTRG.148	Chr00	5593778	5594156	i	379	0.0937098	noncoding	LncRNA
MSTRG.149.1	MSTRG.149	Chr00	5952854	5953701	u	739	0.029594	noncoding	LncRNA
MSTRG.150.1	MSTRG.150	Chr00	5979449	5979898	u	450	0.0288288	noncoding	LncRNA
MSTRG.151.1	MSTRG.151	Chr00	6006080	6006312	u	233	0.0293343	noncoding	LncRNA
MSTRG.152.1	MSTRG.152	Chr00	5606437	5611081	k	3496	1	coding	/
AUR62043987-RA	MSTRG.152	Chr00	5606437	5610001	=	2697	1	coding	/
MSTRG.152.3	MSTRG.152	Chr00	5606647	5608085	j	864	0.826761	coding	/
MSTRG.152.4	MSTRG.152	Chr00	5608186	5611081	n	2596	0.995174	coding	/
MSTRG.153.1	MSTRG.153	Chr00	5606644	5606980	x	337	0.0148465	noncoding	LncRNA
MSTRG.154.1	MSTRG.154	Chr00	6080769	6081111	u	343	0.0136477	noncoding	LncRNA
MSTRG.155.1	MSTRG.155	Chr00	6111029	6111324	u	296	0.00351129	noncoding	LncRNA
MSTRG.156.1	MSTRG.156	Chr00	6118953	6119381	u	429	0.0118179	noncoding	LncRNA
MSTRG.157.1	MSTRG.157	Chr00	6471273	6471632	u	360	0.00506653	noncoding	LncRNA
MSTRG.158.1	MSTRG.158	Chr00	6472113	6472509	u	397	0.0219972	noncoding	LncRNA
MSTRG.159.1	MSTRG.159	Chr00	6486082	6486451	u	370	0.0202422	noncoding	LncRNA
MSTRG.160.1	MSTRG.160	Chr00	6489495	6489873	u	379	0.169844	noncoding	LncRNA
MSTRG.161.1	MSTRG.161	Chr00	6561779	6562137	u	359	0.0119001	noncoding	LncRNA
MSTRG.162.1	MSTRG.162	Chr00	6567288	6567646	u	359	0.0119001	noncoding	LncRNA
MSTRG.163.1	MSTRG.163	Chr00	6576939	6577308	u	370	0.0170172	noncoding	LncRNA
MSTRG.164.1	MSTRG.164	Chr00	6674543	6674836	u	294	0.0186856	noncoding	LncRNA
MSTRG.165.1	MSTRG.165	Chr00	6678791	6679028	u	238	0.00909165	noncoding	LncRNA
MSTRG.166.1	MSTRG.166	Chr00	6679413	6679614	u	202	1.28922e-05	noncoding	LncRNA
MSTRG.167.1	MSTRG.167	Chr00	6745021	6745573	u	553	0.148511	noncoding	LncRNA
MSTRG.168.1	MSTRG.168	Chr00	6327979	6347148	k	1627	0.97935	coding	/
AUR62044119-RA	MSTRG.168	Chr00	6327979	6332568	=	1400	0.987597	coding	/
MSTRG.168.3	MSTRG.168	Chr00	6330175	6331804	j	545	0.719452	coding	/
MSTRG.168.4	MSTRG.168	Chr00	6342288	6347148	j	1811	0.99995	coding	/
AUR62044120-RA	MSTRG.168	Chr00	6342354	6346921	=	1435	1	coding	/
MSTRG.169.1	MSTRG.169	Chr00	6798665	6799310	u	646	0.00788057	noncoding	LncRNA
MSTRG.170.1	MSTRG.170	Chr00	6820101	6820416	u	316	0.0336928	noncoding	LncRNA
MSTRG.171.1	MSTRG.171	Chr00	6829005	6829547	u	543	0.0232884	noncoding	LncRNA
AUR62043471-RA	MSTRG.172	Chr00	6823119	6826797	=	357	0.914403	coding	/
MSTRG.173.1	MSTRG.173	Chr00	6826507	6826912	x	406	0.00312027	noncoding	LncRNA
MSTRG.174.1	MSTRG.174	Chr00	6831071	6831459	u	389	0.0147718	noncoding	LncRNA
MSTRG.175.1	MSTRG.175	Chr00	6838462	6838690	u	229	0.0251979	noncoding	LncRNA
MSTRG.176.1	MSTRG.176	Chr00	6882643	6883189	u	547	0.0102498	noncoding	LncRNA
MSTRG.177.1	MSTRG.177	Chr00	6890783	6891158	u	376	0.00848284	noncoding	LncRNA
MSTRG.178.1	MSTRG.178	Chr00	7003240	7003580	u	341	0.0755624	noncoding	LncRNA
MSTRG.179.1	MSTRG.179	Chr00	7007239	7007823	u	585	0.0221011	noncoding	LncRNA
MSTRG.180.1	MSTRG.180	Chr00	7008139	7008484	u	346	0.0356872	noncoding	LncRNA
MSTRG.181.1	MSTRG.181	Chr00	7240669	7242553	u	1885	0.0478369	noncoding	LncRNA
MSTRG.182.1	MSTRG.182	Chr00	7242855	7243744	u	890	0.464976	noncoding	LncRNA
MSTRG.183.1	MSTRG.183	Chr00	6867005	6882440	j	2329	1	coding	/
AUR62043474-RA	MSTRG.183	Chr00	6867037	6868349	=	621	0.997866	coding	/
AUR62043475-RA	MSTRG.183	Chr00	6870618	6880369	=	810	0.999983	coding	/
MSTRG.184.1	MSTRG.184	Chr00	6867024	6867487	x	464	0.0520578	noncoding	LncRNA
MSTRG.185.1	MSTRG.185	Chr00	6868450	6868765	u	316	0.00419075	noncoding	LncRNA
MSTRG.186.1	MSTRG.186	Chr00	7258723	7259801	u	1032	0.096018	noncoding	LncRNA
MSTRG.187.1	MSTRG.187	Chr00	7244249	7257671	u	2323	0.0244911	noncoding	LncRNA
MSTRG.188.1	MSTRG.188	Chr00	7245368	7245693	u	326	0.408913	noncoding	LncRNA
MSTRG.189.1	MSTRG.189	Chr00	7245975	7247128	u	1154	0.0829842	noncoding	LncRNA
MSTRG.190.1	MSTRG.190	Chr00	7247715	7248048	u	334	1.57808e-05	noncoding	LncRNA
MSTRG.191.1	MSTRG.191	Chr00	7248556	7249885	u	1265	0.0263881	noncoding	LncRNA
MSTRG.192.1	MSTRG.192	Chr00	7252453	7254201	u	1749	0.304702	noncoding	LncRNA
MSTRG.193.1	MSTRG.193	Chr00	7255657	7255956	u	300	0.155398	noncoding	LncRNA
MSTRG.194.1	MSTRG.194	Chr00	7278359	7278713	u	355	0.0245371	noncoding	LncRNA
MSTRG.195.1	MSTRG.195	Chr00	7292643	7292936	u	294	0.140132	noncoding	LncRNA
AUR62044378-RA	MSTRG.196	Chr00	7307276	7307849	=	501	0.992687	coding	/
MSTRG.197.1	MSTRG.197	Chr00	7312290	7312615	u	326	0.0103405	noncoding	LncRNA
MSTRG.198.1	MSTRG.198	Chr00	7314632	7314893	u	262	0.00779996	noncoding	LncRNA
MSTRG.199.1	MSTRG.199	Chr00	7319112	7319942	u	831	0.0194984	noncoding	LncRNA
MSTRG.200.1	MSTRG.200	Chr00	7322973	7323302	u	330	0.00466212	noncoding	LncRNA
MSTRG.201.1	MSTRG.201	Chr00	7331650	7331864	u	215	0.051401	noncoding	LncRNA
MSTRG.202.1	MSTRG.202	Chr00	7333973	7334472	u	500	0.00580798	noncoding	LncRNA
MSTRG.203.1	MSTRG.203	Chr00	7260008	7266102	j	4372	0.113022	noncoding	LncRNA
AUR62044377-RA	MSTRG.203	Chr00	7260576	7266102	=	1266	0.562411	coding	/
MSTRG.203.3	MSTRG.203	Chr00	7260623	7262349	n	1057	0.72185	coding	/
MSTRG.203.4	MSTRG.203	Chr00	7264003	7266102	j	1881	0.0587269	noncoding	LncRNA
MSTRG.203.5	MSTRG.203	Chr00	7264183	7266102	o	1398	0.100311	noncoding	LncRNA
MSTRG.204.1	MSTRG.204	Chr00	7263608	7267180	x	3573	0.0230036	noncoding	LncRNA
MSTRG.205.1	MSTRG.205	Chr00	7339103	7340094	u	992	0.0459375	noncoding	LncRNA
MSTRG.206.1	MSTRG.206	Chr00	7338122	7338733	u	612	0.00611598	noncoding	LncRNA
MSTRG.207.1	MSTRG.207	Chr00	7335890	7337428	u	1539	0.0170241	noncoding	LncRNA
MSTRG.208.1	MSTRG.208	Chr00	7346765	7347136	u	372	0.0245182	noncoding	LncRNA
MSTRG.209.1	MSTRG.209	Chr00	7348057	7348423	u	367	0.165248	noncoding	LncRNA
MSTRG.210.1	MSTRG.210	Chr00	7352539	7352751	u	213	0.0169606	noncoding	LncRNA
MSTRG.211.1	MSTRG.211	Chr00	7357432	7357749	u	318	0.0195211	noncoding	LncRNA
MSTRG.212.1	MSTRG.212	Chr00	7359538	7360159	u	622	0.0265646	noncoding	LncRNA
MSTRG.213.1	MSTRG.213	Chr00	7363987	7364404	u	418	0.01073	noncoding	LncRNA
MSTRG.214.1	MSTRG.214	Chr00	7380319	7380669	u	351	0.084177	noncoding	LncRNA
MSTRG.215.1	MSTRG.215	Chr00	7381986	7382642	u	657	0.0113662	noncoding	LncRNA
MSTRG.216.1	MSTRG.216	Chr00	7391964	7392487	u	524	0.0100258	noncoding	LncRNA
MSTRG.217.1	MSTRG.217	Chr00	7393795	7394342	u	548	0.0152509	noncoding	LncRNA
MSTRG.218.1	MSTRG.218	Chr00	7477642	7478147	u	506	0.0199474	noncoding	LncRNA
AUR62043745-RA	MSTRG.219	Chr00	7609276	7615551	=	2023	1	coding	/
AUR62043746-RA	MSTRG.220	Chr00	7617036	7620671	=	1125	0.0527537	noncoding	LncRNA
MSTRG.220.2	MSTRG.220	Chr00	7619286	7620671	n	719	0.0737887	noncoding	LncRNA
MSTRG.221.1	MSTRG.221	Chr00	7639401	7639666	u	266	0.010829	noncoding	LncRNA
MSTRG.222.1	MSTRG.222	Chr00	7907970	7908271	u	302	0.180886	noncoding	LncRNA
MSTRG.223.1	MSTRG.223	Chr00	7623166	7628223	j	1701	0.999108	coding	/
AUR62043747-RA	MSTRG.223	Chr00	7623770	7628223	=	1202	0.133543	noncoding	LncRNA
MSTRG.224.1	MSTRG.224	Chr00	8333957	8334530	u	574	0.0253379	noncoding	LncRNA
MSTRG.225.1	MSTRG.225	Chr00	8336692	8337203	u	512	0.00970305	noncoding	LncRNA
AUR62044062-RA	MSTRG.226	Chr00	7912325	7924340	=	3081	1	coding	/
MSTRG.227.1	MSTRG.227	Chr00	7912764	7913790	i	1027	0.0518628	noncoding	LncRNA
MSTRG.228.1	MSTRG.228	Chr00	8339299	8345270	u	603	0.0281038	noncoding	LncRNA
MSTRG.229.1	MSTRG.229	Chr00	8405472	8405703	u	232	0.113023	noncoding	LncRNA
MSTRG.230.1	MSTRG.230	Chr00	8487476	8488164	u	689	0.517622	coding	/
MSTRG.231.1	MSTRG.231	Chr00	8505630	8505911	u	282	0.0141398	noncoding	LncRNA
MSTRG.232.1	MSTRG.232	Chr00	8546405	8546818	u	414	0.0190908	noncoding	LncRNA
MSTRG.233.1	MSTRG.233	Chr00	8558295	8558583	u	289	0.00898627	noncoding	LncRNA
MSTRG.234.1	MSTRG.234	Chr00	8561977	8562230	u	254	0.00730445	noncoding	LncRNA
MSTRG.235.1	MSTRG.235	Chr00	8660257	8660539	u	283	0.0711461	noncoding	LncRNA
MSTRG.236.1	MSTRG.236	Chr00	8671759	8672116	u	358	0.0167603	noncoding	LncRNA
MSTRG.237.1	MSTRG.237	Chr00	8777060	8777281	u	222	0.0041878	noncoding	LncRNA
MSTRG.238.1	MSTRG.238	Chr00	8785731	8786266	u	257	0.0122918	noncoding	LncRNA
MSTRG.239.1	MSTRG.239	Chr00	8813396	8813623	u	228	0.0181718	noncoding	LncRNA
MSTRG.240.1	MSTRG.240	Chr00	8892569	8892933	u	365	0.00646138	noncoding	LncRNA
MSTRG.241.1	MSTRG.241	Chr00	8819748	8820590	u	843	0.0170903	noncoding	LncRNA
MSTRG.242.1	MSTRG.242	Chr00	8895802	8896408	u	607	0.0089432	noncoding	LncRNA
MSTRG.243.1	MSTRG.243	Chr00	8929333	8929622	u	290	0.0123941	noncoding	LncRNA
MSTRG.244.1	MSTRG.244	Chr00	8931134	8931589	u	456	0.0503784	noncoding	LncRNA
MSTRG.245.1	MSTRG.245	Chr00	8941113	8941382	u	270	0.003944	noncoding	LncRNA
MSTRG.246.1	MSTRG.246	Chr00	8947554	8947879	u	326	0.0120505	noncoding	LncRNA
MSTRG.247.1	MSTRG.247	Chr00	8967604	8968044	u	441	0.0434249	noncoding	LncRNA
MSTRG.248.1	MSTRG.248	Chr00	9004049	9004382	u	334	0.0827823	noncoding	LncRNA
AUR62044091-RA	MSTRG.249	Chr00	8949424	8961740	=	453	0.928934	coding	/
MSTRG.250.1	MSTRG.250	Chr00	8949867	8950728	i	862	0.545409	coding	/
MSTRG.251.1	MSTRG.251	Chr00	8957110	8957439	i	330	0.00489056	noncoding	LncRNA
MSTRG.252.1	MSTRG.252	Chr00	9008587	9008942	u	356	0.00790132	noncoding	LncRNA
AUR62044092-RA	MSTRG.253	Chr00	8969959	8973799	=	606	0.619533	coding	/
MSTRG.254.1	MSTRG.254	Chr00	8973609	8974233	x	625	0.0506574	noncoding	LncRNA
MSTRG.255.1	MSTRG.255	Chr00	9013068	9013326	u	259	0.00839999	noncoding	LncRNA
MSTRG.256.1	MSTRG.256	Chr00	9017339	9017638	u	300	0.0066306	noncoding	LncRNA
MSTRG.257.1	MSTRG.257	Chr00	9077461	9077718	u	258	0.00644082	noncoding	LncRNA
MSTRG.258.1	MSTRG.258	Chr00	9079855	9082320	u	744	0.0281226	noncoding	LncRNA
MSTRG.259.1	MSTRG.259	Chr00	9253481	9253686	u	206	0.00820195	noncoding	LncRNA
MSTRG.260.1	MSTRG.260	Chr00	9195786	9202105	u	584	0.0590178	noncoding	LncRNA
MSTRG.261.1	MSTRG.261	Chr00	9198929	9199375	u	447	0.0583008	noncoding	LncRNA
MSTRG.262.1	MSTRG.262	Chr00	9264782	9265102	u	321	0.0321658	noncoding	LncRNA
MSTRG.263.1	MSTRG.263	Chr00	9271179	9271706	u	528	0.0395657	noncoding	LncRNA
AUR62043942-RA	MSTRG.264	Chr00	9092674	9110744	=	1674	0.996915	coding	/
MSTRG.264.2	MSTRG.264	Chr00	9108179	9108615	i	437	0.00359461	noncoding	LncRNA
MSTRG.265.1	MSTRG.265	Chr00	9411419	9411789	u	371	0.357989	noncoding	LncRNA
MSTRG.266.1	MSTRG.266	Chr00	9416013	9416383	p	371	0.0180215	noncoding	LncRNA
MSTRG.267.1	MSTRG.267	Chr00	9416951	9417286	u	336	0.00947266	noncoding	LncRNA
AUR62043832-RA	MSTRG.268	Chr00	9408073	9410041	=	1253	1	coding	/
MSTRG.269.1	MSTRG.269	Chr00	9423856	9424129	u	274	0.00278193	noncoding	LncRNA
MSTRG.270.1	MSTRG.270	Chr00	9424435	9424972	u	538	0.031421	noncoding	LncRNA
MSTRG.271.1	MSTRG.271	Chr00	9431369	9431575	p	207	0.0533074	noncoding	LncRNA
MSTRG.272.1	MSTRG.272	Chr00	9417536	9417977	x	442	0.017037	noncoding	LncRNA
MSTRG.273.1	MSTRG.273	Chr00	9417581	9418152	j	478	0.0122876	noncoding	LncRNA
AUR62043833-RA	MSTRG.273	Chr00	9417844	9419789	=	390	0.241493	noncoding	LncRNA
MSTRG.273.3	MSTRG.273	Chr00	9418276	9419789	j	287	0.0517064	noncoding	LncRNA
MSTRG.274.1	MSTRG.274	Chr00	9419646	9420555	x	910	0.0174143	noncoding	LncRNA
MSTRG.275.1	MSTRG.275	Chr00	9436547	9437277	u	731	0.353973	noncoding	LncRNA
MSTRG.276.1	MSTRG.276	Chr00	9445510	9446026	u	421	0.0120203	noncoding	LncRNA
AUR62043834-RA	MSTRG.277	Chr00	9432160	9435409	=	1360	0.999939	coding	/
MSTRG.278.1	MSTRG.278	Chr00	9938794	9939091	u	298	0.101331	noncoding	LncRNA
MSTRG.279.1	MSTRG.279	Chr00	9959586	9959958	u	373	0.0145894	noncoding	LncRNA
MSTRG.280.1	MSTRG.280	Chr00	9962679	9963235	u	557	0.00893594	noncoding	LncRNA
MSTRG.281.1	MSTRG.281	Chr00	9968879	9969454	u	576	0.125836	noncoding	LncRNA
MSTRG.282.1	MSTRG.282	Chr00	9969960	9970216	u	257	0.0229625	noncoding	LncRNA
AUR62043835-RA	MSTRG.283	Chr00	9446646	9450889	=	2811	0.999991	coding	/
MSTRG.283.2	MSTRG.283	Chr00	9447066	9449204	m	1738	0.456328	noncoding	LncRNA
MSTRG.284.1	MSTRG.284	Chr00	10175245	10175968	u	724	0.0509691	noncoding	LncRNA
MSTRG.285.1	MSTRG.285	Chr00	10183131	10184130	u	1000	0.02833	noncoding	LncRNA
AUR62044411-RA	MSTRG.286	Chr00	10184632	10187219	=	886	0.991115	coding	/
MSTRG.287.1	MSTRG.287	Chr00	10340046	10340298	u	253	0.00516203	noncoding	LncRNA
MSTRG.288.1	MSTRG.288	Chr00	10350532	10352917	u	1385	0.162486	noncoding	LncRNA
MSTRG.289.1	MSTRG.289	Chr00	10188155	10188791	x	637	0.110447	noncoding	LncRNA
AUR62044412-RA	MSTRG.290	Chr00	10188168	10193724	=	3032	0.464797	noncoding	LncRNA
MSTRG.290.2	MSTRG.290	Chr00	10188173	10193724	j	1303	0.799415	coding	/
MSTRG.290.3	MSTRG.290	Chr00	10188175	10193724	j	1132	0.93692	coding	/
MSTRG.291.1	MSTRG.291	Chr00	10370980	10372845	x	1866	0.187489	noncoding	LncRNA
AUR62044458-RA	MSTRG.292	Chr00	10371098	10373077	=	1524	1	coding	/
MSTRG.293.1	MSTRG.293	Chr00	10378440	10378957	u	518	0.00380399	noncoding	LncRNA
MSTRG.294.1	MSTRG.294	Chr00	10527732	10528421	u	690	0.0167569	noncoding	LncRNA
MSTRG.295.1	MSTRG.295	Chr00	10536544	10536746	u	203	1.78899e-05	noncoding	LncRNA
MSTRG.296.1	MSTRG.296	Chr00	10537853	10538362	u	510	0.189117	noncoding	LncRNA
AUR62044283-RA	MSTRG.297	Chr00	10513497	10525568	=	3138	1	coding	/
MSTRG.297.2	MSTRG.297	Chr00	10518262	10518819	n	558	0.0786398	noncoding	LncRNA
MSTRG.298.1	MSTRG.298	Chr00	10513621	10514667	i	1047	0.0999344	noncoding	LncRNA
MSTRG.299.1	MSTRG.299	Chr00	10524370	10524602	i	233	0.0028878	noncoding	LncRNA
MSTRG.300.1	MSTRG.300	Chr00	10679031	10679369	u	339	1.85904e-05	noncoding	LncRNA
MSTRG.301.1	MSTRG.301	Chr00	10675684	10675936	u	253	0.0122759	noncoding	LncRNA
MSTRG.302.1	MSTRG.302	Chr00	10680068	10680413	u	346	0.00450217	noncoding	LncRNA
MSTRG.303.1	MSTRG.303	Chr00	10681930	10682307	u	378	0.00476342	noncoding	LncRNA
MSTRG.304.1	MSTRG.304	Chr00	10682667	10683924	u	1258	0.327656	noncoding	LncRNA
MSTRG.305.1	MSTRG.305	Chr00	10696308	10696643	u	336	0.00963485	noncoding	LncRNA
MSTRG.306.1	MSTRG.306	Chr00	10711151	10711437	u	287	0.0748536	noncoding	LncRNA
MSTRG.307.1	MSTRG.307	Chr00	10699105	10700093	u	989	0.00446262	noncoding	LncRNA
MSTRG.308.1	MSTRG.308	Chr00	10701560	10706597	x	562	0.00402785	noncoding	LncRNA
AUR62044757-RA	MSTRG.309	Chr00	10705077	10705532	=	456	0.982868	coding	/
MSTRG.310.1	MSTRG.310	Chr00	10748536	10754762	u	551	0.108003	noncoding	LncRNA
MSTRG.311.1	MSTRG.311	Chr00	10874920	10875292	u	373	0.00504788	noncoding	LncRNA
MSTRG.312.1	MSTRG.312	Chr00	10878068	10878859	u	792	0.0163708	noncoding	LncRNA
MSTRG.313.1	MSTRG.313	Chr00	10888438	10890504	j	980	0.999976	coding	/
AUR62043195-RA	MSTRG.313	Chr00	10888506	10891773	=	606	0.999215	coding	/
MSTRG.314.1	MSTRG.314	Chr00	10925165	10925676	u	512	0.0458123	noncoding	LncRNA
MSTRG.315.1	MSTRG.315	Chr00	10927552	10927902	p	351	0.0393876	noncoding	LncRNA
AUR62043196-RA	MSTRG.316	Chr00	10898485	10904320	=	3120	1	coding	/
MSTRG.316.2	MSTRG.316	Chr00	10903346	10907663	j	1401	0.999995	coding	/
MSTRG.317.1	MSTRG.317	Chr00	10903595	10903847	i	253	0.0526465	noncoding	LncRNA
MSTRG.318.1	MSTRG.318	Chr00	10843321	10844109	x	789	0.238184	noncoding	LncRNA
MSTRG.319.1	MSTRG.319	Chr00	10843323	10846067	j	1039	0.877602	coding	/
AUR62043192-RA	MSTRG.319	Chr00	10843419	10845087	=	682	0.957026	coding	/
MSTRG.319.3	MSTRG.319	Chr00	10843644	10866417	j	1254	1	coding	/
MSTRG.319.4	MSTRG.319	Chr00	10862707	10871797	k	3076	1	coding	/
AUR62043193-RA	MSTRG.319	Chr00	10862707	10869880	=	2937	1	coding	/
MSTRG.319.6	MSTRG.319	Chr00	10862721	10871797	j	3357	1	coding	/
MSTRG.319.7	MSTRG.319	Chr00	10862764	10871797	j	3102	1	coding	/
MSTRG.319.8	MSTRG.319	Chr00	10867675	10871797	o	2376	1	coding	/
MSTRG.320.1	MSTRG.320	Chr00	10844464	10844832	i	369	0.0110189	noncoding	LncRNA
MSTRG.321.1	MSTRG.321	Chr00	10845859	10846067	u	209	0.0135719	noncoding	LncRNA
MSTRG.322.1	MSTRG.322	Chr00	10862785	10863089	x	305	0.00932089	noncoding	LncRNA
MSTRG.323.1	MSTRG.323	Chr00	10863900	10864145	i	246	0.0164906	noncoding	LncRNA
AUR62043198-RA	MSTRG.324	Chr00	10932473	10934503	=	1203	1	coding	/
MSTRG.325.1	MSTRG.325	Chr00	10932568	10932914	x	347	0.0364807	noncoding	LncRNA
AUR62043201-RA	MSTRG.326	Chr00	10951658	10952966	=	924	1	coding	/
MSTRG.327.1	MSTRG.327	Chr00	10951774	10951991	x	218	0.0297492	noncoding	LncRNA
MSTRG.328.1	MSTRG.328	Chr00	10952375	10952841	x	467	0.0154989	noncoding	LncRNA
MSTRG.329.1	MSTRG.329	Chr00	10958061	10958398	u	338	0.00683784	noncoding	LncRNA
AUR62043202-RA	MSTRG.330	Chr00	10956015	10957136	=	979	0.999997	coding	/
MSTRG.331.1	MSTRG.331	Chr00	10935669	10936115	u	447	0.0111864	noncoding	LncRNA
MSTRG.332.1	MSTRG.332	Chr00	10936070	10939895	o	1866	1	coding	/
AUR62043199-RA	MSTRG.332	Chr00	10938167	10941315	=	2081	1	coding	/
MSTRG.332.3	MSTRG.332	Chr00	10940733	10941315	o	438	0.0159024	noncoding	LncRNA
MSTRG.333.1	MSTRG.333	Chr00	10938421	10939556	x	1136	0.0434774	noncoding	LncRNA
AUR62043200-RA	MSTRG.334	Chr00	10941286	10946163	=	1083	1	coding	/
MSTRG.335.1	MSTRG.335	Chr00	10959906	10960130	u	225	0.021487	noncoding	LncRNA
MSTRG.336.1	MSTRG.336	Chr00	10960157	10960416	u	260	0.00702273	noncoding	LncRNA
MSTRG.337.1	MSTRG.337	Chr00	10961308	10963264	x	1957	0.0758514	noncoding	LncRNA
AUR62043203-RA	MSTRG.338	Chr00	10961313	10962350	=	1038	1	coding	/
MSTRG.339.1	MSTRG.339	Chr00	10963573	10963838	p	266	0.00275141	noncoding	LncRNA
MSTRG.340.1	MSTRG.340	Chr00	10964616	10964900	u	285	0.0335472	noncoding	LncRNA
MSTRG.341.1	MSTRG.341	Chr00	10966402	10966672	u	271	0.018303	noncoding	LncRNA
AUR62043204-RA	MSTRG.342	Chr00	10966837	10971222	=	920	0.206945	noncoding	LncRNA
MSTRG.342.2	MSTRG.342	Chr00	10966899	10971222	m	1052	0.99891	coding	/
MSTRG.343.1	MSTRG.343	Chr00	10966903	10967287	x	385	0.130532	noncoding	LncRNA
MSTRG.344.1	MSTRG.344	Chr00	11103221	11106646	x	3426	0.691781	coding	/
MSTRG.345.1	MSTRG.345	Chr00	11103254	11106646	o	3313	1	coding	/
AUR62044762-RA	MSTRG.345	Chr00	11103392	11106646	=	3255	1	coding	/
MSTRG.346.1	MSTRG.346	Chr00	11239740	11240532	u	793	0.0370562	noncoding	LncRNA
MSTRG.347.1	MSTRG.347	Chr00	11316626	11316976	u	351	0.0219391	noncoding	LncRNA
MSTRG.348.1	MSTRG.348	Chr00	11317851	11318306	u	456	0.00616037	noncoding	LncRNA
MSTRG.349.1	MSTRG.349	Chr00	11127615	11138267	u	798	0.298419	noncoding	LncRNA
MSTRG.350.1	MSTRG.350	Chr00	11321839	11322602	u	495	0.0409792	noncoding	LncRNA
MSTRG.351.1	MSTRG.351	Chr00	11322047	11322611	u	565	0.0303563	noncoding	LncRNA
MSTRG.352.1	MSTRG.352	Chr00	11325360	11325697	u	338	0.042794	noncoding	LncRNA
MSTRG.353.1	MSTRG.353	Chr00	11527593	11528347	u	755	0.00495977	noncoding	LncRNA
MSTRG.354.1	MSTRG.354	Chr00	11565140	11565507	u	368	0.138535	noncoding	LncRNA
MSTRG.355.1	MSTRG.355	Chr00	11565776	11566050	u	275	0.00843755	noncoding	LncRNA
MSTRG.356.1	MSTRG.356	Chr00	11569131	11569366	u	236	0.0128842	noncoding	LncRNA
MSTRG.357.1	MSTRG.357	Chr00	11573922	11574200	u	279	0.0212811	noncoding	LncRNA
MSTRG.358.1	MSTRG.358	Chr00	11584328	11584727	u	400	0.0197886	noncoding	LncRNA
MSTRG.359.1	MSTRG.359	Chr00	11585705	11586298	u	594	0.0121073	noncoding	LncRNA
MSTRG.360.1	MSTRG.360	Chr00	11587506	11587843	u	338	0.0119032	noncoding	LncRNA
MSTRG.361.1	MSTRG.361	Chr00	11588037	11588407	u	371	0.00563503	noncoding	LncRNA
MSTRG.362.1	MSTRG.362	Chr00	11603039	11603489	p	451	0.00256229	noncoding	LncRNA
MSTRG.363.1	MSTRG.363	Chr00	11607138	11607459	u	322	0.0082134	noncoding	LncRNA
MSTRG.364.1	MSTRG.364	Chr00	11625645	11625963	u	319	0.041686	noncoding	LncRNA
AUR62043718-RA	MSTRG.365	Chr00	11603551	11603929	=	228	0.173806	noncoding	LncRNA
MSTRG.366.1	MSTRG.366	Chr00	11603908	11604279	x	372	0.0145745	noncoding	LncRNA
MSTRG.367.1	MSTRG.367	Chr00	11633607	11633913	u	307	0.12986	noncoding	LncRNA
MSTRG.368.1	MSTRG.368	Chr00	11634206	11634411	u	206	1.62058e-06	noncoding	LncRNA
MSTRG.369.1	MSTRG.369	Chr00	11634655	11635011	u	357	0.0111147	noncoding	LncRNA
MSTRG.370.1	MSTRG.370	Chr00	11638281	11638619	u	339	0.126544	noncoding	LncRNA
MSTRG.371.1	MSTRG.371	Chr00	11656006	11656989	u	984	0.00354136	noncoding	LncRNA
MSTRG.372.1	MSTRG.372	Chr00	11683938	11684290	u	353	0.0158397	noncoding	LncRNA
MSTRG.373.1	MSTRG.373	Chr00	11711930	11712579	u	650	0.0358114	noncoding	LncRNA
MSTRG.374.1	MSTRG.374	Chr00	11713067	11713804	u	738	0.155806	noncoding	LncRNA
MSTRG.375.1	MSTRG.375	Chr00	11723466	11723748	u	283	0.00535019	noncoding	LncRNA
MSTRG.376.1	MSTRG.376	Chr00	11724234	11724534	u	301	0.00891199	noncoding	LncRNA
MSTRG.377.1	MSTRG.377	Chr00	11734801	11735526	u	726	0.0278343	noncoding	LncRNA
MSTRG.378.1	MSTRG.378	Chr00	11738784	11739729	u	946	0.149804	noncoding	LncRNA
MSTRG.379.1	MSTRG.379	Chr00	11574758	11581966	n	1767	0.146463	noncoding	LncRNA
MSTRG.379.2	MSTRG.379	Chr00	11574758	11581966	j	1560	0.0393936	noncoding	LncRNA
MSTRG.379.3	MSTRG.379	Chr00	11574798	11581966	j	1414	0.0419494	noncoding	LncRNA
AUR62043717-RA	MSTRG.379	Chr00	11574826	11579040	=	1015	0.584664	coding	/
MSTRG.379.5	MSTRG.379	Chr00	11574863	11581966	j	1229	0.086988	noncoding	LncRNA
MSTRG.379.6	MSTRG.379	Chr00	11574863	11581966	n	1774	0.0580322	noncoding	LncRNA
MSTRG.379.7	MSTRG.379	Chr00	11574864	11581966	n	1563	0.0642403	noncoding	LncRNA
MSTRG.379.8	MSTRG.379	Chr00	11574865	11581966	j	1393	0.0452365	noncoding	LncRNA
MSTRG.379.9	MSTRG.379	Chr00	11574865	11581966	j	1491	0.297141	noncoding	LncRNA
MSTRG.380.1	MSTRG.380	Chr00	11579470	11579947	u	478	0.00633693	noncoding	LncRNA
MSTRG.381.1	MSTRG.381	Chr00	11580265	11580608	u	344	0.0121925	noncoding	LncRNA
MSTRG.382.1	MSTRG.382	Chr00	11773823	11774321	u	499	0.0169647	noncoding	LncRNA
MSTRG.383.1	MSTRG.383	Chr00	11760628	11760902	u	275	0.0263181	noncoding	LncRNA
MSTRG.384.1	MSTRG.384	Chr00	11740073	11740400	u	328	0.00839152	noncoding	LncRNA
MSTRG.385.1	MSTRG.385	Chr00	11772579	11772830	u	252	0.00718638	noncoding	LncRNA
MSTRG.386.1	MSTRG.386	Chr00	11780302	11780611	u	310	0.0161254	noncoding	LncRNA
MSTRG.387.1	MSTRG.387	Chr00	11756582	11757412	u	831	0.131572	noncoding	LncRNA
MSTRG.388.1	MSTRG.388	Chr00	11789856	11790200	u	345	0.00467715	noncoding	LncRNA
MSTRG.389.1	MSTRG.389	Chr00	11816509	11816787	u	279	0.191695	noncoding	LncRNA
MSTRG.390.1	MSTRG.390	Chr00	11819285	11819623	u	339	0.0402418	noncoding	LncRNA
MSTRG.391.1	MSTRG.391	Chr00	11820021	11820593	u	573	0.036583	noncoding	LncRNA
MSTRG.392.1	MSTRG.392	Chr00	11828338	11831599	u	741	0.00793704	noncoding	LncRNA
MSTRG.393.1	MSTRG.393	Chr00	11831711	11832209	u	499	0.0169647	noncoding	LncRNA
MSTRG.394.1	MSTRG.394	Chr00	11846646	11847033	u	388	0.00507074	noncoding	LncRNA
MSTRG.395.1	MSTRG.395	Chr00	11847464	11848101	u	638	0.00782356	noncoding	LncRNA
MSTRG.396.1	MSTRG.396	Chr00	11856226	11856877	u	652	0.00748528	noncoding	LncRNA
MSTRG.397.1	MSTRG.397	Chr00	11874558	11874836	u	279	0.191695	noncoding	LncRNA
MSTRG.398.1	MSTRG.398	Chr00	11877333	11877832	u	500	0.0274351	noncoding	LncRNA
MSTRG.399.1	MSTRG.399	Chr00	11878068	11878539	u	472	0.122005	noncoding	LncRNA
MSTRG.400.1	MSTRG.400	Chr00	11884679	11885535	u	857	0.0487107	noncoding	LncRNA
MSTRG.401.1	MSTRG.401	Chr00	11902190	11902743	u	554	0.00541966	noncoding	LncRNA
MSTRG.402.1	MSTRG.402	Chr00	11905055	11906692	u	1638	0.395359	noncoding	LncRNA
MSTRG.403.1	MSTRG.403	Chr00	11913988	11914220	u	233	0.0978677	noncoding	LncRNA
MSTRG.404.1	MSTRG.404	Chr00	11915563	11915955	u	393	0.00429208	noncoding	LncRNA
MSTRG.405.1	MSTRG.405	Chr00	11919577	11920358	u	782	0.0123302	noncoding	LncRNA
MSTRG.406.1	MSTRG.406	Chr00	11925248	11926061	u	814	0.0190685	noncoding	LncRNA
MSTRG.407.1	MSTRG.407	Chr00	11942412	11943215	u	804	0.022047	noncoding	LncRNA
MSTRG.408.1	MSTRG.408	Chr00	11943625	11944230	u	606	0.00860478	noncoding	LncRNA
MSTRG.409.1	MSTRG.409	Chr00	11946451	11946823	u	373	0.439069	noncoding	LncRNA
MSTRG.410.1	MSTRG.410	Chr00	11958423	11959118	u	696	0.0145957	noncoding	LncRNA
MSTRG.411.1	MSTRG.411	Chr00	11960070	11960345	u	276	0.0139845	noncoding	LncRNA
MSTRG.412.1	MSTRG.412	Chr00	11961072	11961638	u	567	0.0145802	noncoding	LncRNA
MSTRG.413.1	MSTRG.413	Chr00	11972520	11972870	u	351	0.0243485	noncoding	LncRNA
MSTRG.414.1	MSTRG.414	Chr00	11989695	11990400	u	706	0.0173676	noncoding	LncRNA
MSTRG.415.1	MSTRG.415	Chr00	12018580	12019137	u	558	0.0577681	noncoding	LncRNA
MSTRG.416.1	MSTRG.416	Chr00	12020879	12021129	u	251	1.71487e-05	noncoding	LncRNA
MSTRG.417.1	MSTRG.417	Chr00	12021566	12021797	u	232	0.0160203	noncoding	LncRNA
MSTRG.418.1	MSTRG.418	Chr00	12026785	12027267	u	483	0.0179671	noncoding	LncRNA
MSTRG.419.1	MSTRG.419	Chr00	12029596	12030003	u	408	0.0145014	noncoding	LncRNA
MSTRG.420.1	MSTRG.420	Chr00	12056833	12057195	u	363	0.00535664	noncoding	LncRNA
MSTRG.421.1	MSTRG.421	Chr00	12058562	12059028	u	467	0.00909228	noncoding	LncRNA
MSTRG.422.1	MSTRG.422	Chr00	12059603	12060470	u	868	0.142827	noncoding	LncRNA
MSTRG.423.1	MSTRG.423	Chr00	12065972	12066403	u	432	0.042504	noncoding	LncRNA
MSTRG.424.1	MSTRG.424	Chr00	12068018	12068543	u	526	0.0950502	noncoding	LncRNA
MSTRG.425.1	MSTRG.425	Chr00	12071240	12071899	u	660	0.0143121	noncoding	LncRNA
MSTRG.426.1	MSTRG.426	Chr00	12077450	12077860	u	411	0.00539295	noncoding	LncRNA
MSTRG.427.1	MSTRG.427	Chr00	12088719	12089053	u	335	0.0251292	noncoding	LncRNA
MSTRG.428.1	MSTRG.428	Chr00	12078198	12078453	u	256	0.0549917	noncoding	LncRNA
MSTRG.429.1	MSTRG.429	Chr00	12078597	12078930	u	334	0.105113	noncoding	LncRNA
MSTRG.430.1	MSTRG.430	Chr00	12111865	12112213	u	349	0.00955293	noncoding	LncRNA
MSTRG.431.1	MSTRG.431	Chr00	12139046	12139337	u	292	0.0487597	noncoding	LncRNA
MSTRG.432.1	MSTRG.432	Chr00	12153220	12153487	u	268	0.00689111	noncoding	LncRNA
MSTRG.433.1	MSTRG.433	Chr00	12174479	12174775	u	297	0.166233	noncoding	LncRNA
MSTRG.434.1	MSTRG.434	Chr00	12416689	12416959	u	271	0.0919218	noncoding	LncRNA
MSTRG.435.1	MSTRG.435	Chr00	12440308	12440641	u	334	0.0372554	noncoding	LncRNA
MSTRG.436.1	MSTRG.436	Chr00	12557368	12557759	u	392	0.0486972	noncoding	LncRNA
MSTRG.437.1	MSTRG.437	Chr00	12090826	12093518	j	885	0.596528	coding	/
MSTRG.437.2	MSTRG.437	Chr00	12090826	12100456	k	2718	1	coding	/
AUR62043719-RA	MSTRG.437	Chr00	12091735	12100456	=	2508	1	coding	/
MSTRG.438.1	MSTRG.438	Chr00	12714198	12714746	u	549	0.145528	noncoding	LncRNA
MSTRG.439.1	MSTRG.439	Chr00	12975829	12976082	u	254	0.00737798	noncoding	LncRNA
MSTRG.440.1	MSTRG.440	Chr00	13335480	13335846	u	367	0.0120264	noncoding	LncRNA
MSTRG.441.1	MSTRG.441	Chr00	12650496	12650863	u	368	0.181442	noncoding	LncRNA
MSTRG.442.1	MSTRG.442	Chr00	13347368	13347830	u	463	0.138701	noncoding	LncRNA
MSTRG.443.1	MSTRG.443	Chr00	13365681	13365994	u	314	0.157064	noncoding	LncRNA
MSTRG.444.1	MSTRG.444	Chr00	13376588	13377640	u	1053	0.0618441	noncoding	LncRNA
MSTRG.445.1	MSTRG.445	Chr00	13378838	13379577	u	740	0.543324	coding	/
MSTRG.446.1	MSTRG.446	Chr00	13366597	13371820	j	2148	1	coding	/
AUR62040531-RA	MSTRG.446	Chr00	13366597	13368281	=	890	0.999985	coding	/
MSTRG.446.3	MSTRG.446	Chr00	13366953	13371820	j	2463	1	coding	/
MSTRG.447.1	MSTRG.447	Chr00	13368620	13369358	u	739	0.0356447	noncoding	LncRNA
MSTRG.448.1	MSTRG.448	Chr00	13403925	13404441	u	517	0.627838	coding	/
MSTRG.449.1	MSTRG.449	Chr00	13409662	13409938	u	277	0.0129956	noncoding	LncRNA
MSTRG.450.1	MSTRG.450	Chr00	13413425	13413631	u	207	0.0032077	noncoding	LncRNA
MSTRG.451.1	MSTRG.451	Chr00	13415140	13415623	u	484	0.0495675	noncoding	LncRNA
MSTRG.452.1	MSTRG.452	Chr00	13416334	13416541	u	208	1.12523e-05	noncoding	LncRNA
MSTRG.453.1	MSTRG.453	Chr00	13416688	13417698	u	1011	0.0573672	noncoding	LncRNA
AUR62040532-RA	MSTRG.454	Chr00	13388687	13395143	=	1749	1	coding	/
MSTRG.455.1	MSTRG.455	Chr00	13394616	13394862	x	247	0.0151858	noncoding	LncRNA
MSTRG.456.1	MSTRG.456	Chr00	13446832	13447162	u	331	1.06568e-05	noncoding	LncRNA
MSTRG.457.1	MSTRG.457	Chr00	13452844	13453177	u	334	0.0487084	noncoding	LncRNA
MSTRG.458.1	MSTRG.458	Chr00	13455118	13455608	u	491	0.0100416	noncoding	LncRNA
MSTRG.459.1	MSTRG.459	Chr00	13466577	13467003	u	427	0.106014	noncoding	LncRNA
MSTRG.460.1	MSTRG.460	Chr00	13460173	13460984	u	308	0.00511417	noncoding	LncRNA
MSTRG.461.1	MSTRG.461	Chr00	13460913	13461272	u	360	0.0364241	noncoding	LncRNA
AUR62040533-RA	MSTRG.462	Chr00	13418781	13441168	=	2397	1	coding	/
MSTRG.463.1	MSTRG.463	Chr00	13418894	13419217	x	324	0.0479234	noncoding	LncRNA
MSTRG.464.1	MSTRG.464	Chr00	13421187	13421482	i	296	0.00357521	noncoding	LncRNA
MSTRG.465.1	MSTRG.465	Chr00	13441046	13441277	x	232	0.00808509	noncoding	LncRNA
MSTRG.466.1	MSTRG.466	Chr00	13517023	13517503	u	481	0.035909	noncoding	LncRNA
MSTRG.467.1	MSTRG.467	Chr00	13518305	13518710	u	406	0.0437283	noncoding	LncRNA
MSTRG.468.1	MSTRG.468	Chr00	13530156	13530603	u	448	0.0127164	noncoding	LncRNA
MSTRG.469.1	MSTRG.469	Chr00	13534983	13535416	u	434	0.0106369	noncoding	LncRNA
MSTRG.470.1	MSTRG.470	Chr00	13537445	13537879	u	435	0.106284	noncoding	LncRNA
MSTRG.471.1	MSTRG.471	Chr00	13538885	13539271	u	387	0.134935	noncoding	LncRNA
MSTRG.472.1	MSTRG.472	Chr00	13467277	13473062	j	3309	0.99941	coding	/
AUR62040536-RA	MSTRG.472	Chr00	13469432	13473062	=	1229	0.99999	coding	/
AUR62040534-RA	MSTRG.473	Chr00	13467280	13468456	=	1177	1	coding	/
AUR62040535-RA	MSTRG.474	Chr00	13468457	13469447	=	991	0.999994	coding	/
MSTRG.475.1	MSTRG.475	Chr00	13547484	13547932	u	449	0.00970139	noncoding	LncRNA
MSTRG.476.1	MSTRG.476	Chr00	13543654	13544108	u	455	0.0567296	noncoding	LncRNA
MSTRG.477.1	MSTRG.477	Chr00	13552893	13553511	p	619	0.0136691	noncoding	LncRNA
MSTRG.478.1	MSTRG.478	Chr00	13571534	13572153	u	620	0.0192985	noncoding	LncRNA
MSTRG.479.1	MSTRG.479	Chr00	13572632	13573083	u	452	0.0113613	noncoding	LncRNA
AUR62040538-RA	MSTRG.480	Chr00	13554005	13567593	=	1557	1	coding	/
MSTRG.481.1	MSTRG.481	Chr00	13565871	13566081	i	211	0.0797439	noncoding	LncRNA
MSTRG.482.1	MSTRG.482	Chr00	13577956	13578311	u	356	0.027571	noncoding	LncRNA
AUR62040541-RA	MSTRG.483	Chr00	13582976	13609058	=	3510	1	coding	/
MSTRG.484.1	MSTRG.484	Chr00	13592379	13592642	x	264	0.0149524	noncoding	LncRNA
MSTRG.485.1	MSTRG.485	Chr00	13606695	13607102	i	408	0.012941	noncoding	LncRNA
AUR62040542-RA	MSTRG.486	Chr00	13613054	13619017	=	3397	1	coding	/
MSTRG.486.2	MSTRG.486	Chr00	13613132	13619017	n	2909	1	coding	/
MSTRG.487.1	MSTRG.487	Chr00	13696920	13697295	u	376	0.0187932	noncoding	LncRNA
MSTRG.488.1	MSTRG.488	Chr00	13697843	13698474	u	632	0.149725	noncoding	LncRNA
AUR62040543-RA	MSTRG.489	Chr00	13631784	13646280	=	1116	1	coding	/
MSTRG.490.1	MSTRG.490	Chr00	13641560	13641970	i	411	0.121204	noncoding	LncRNA
MSTRG.491.1	MSTRG.491	Chr00	13698897	13699459	u	563	0.0139967	noncoding	LncRNA
AUR62040545-RA	MSTRG.492	Chr00	13650947	13671831	=	2436	1	coding	/
MSTRG.493.1	MSTRG.493	Chr00	13658082	13658598	x	517	0.00361362	noncoding	LncRNA
MSTRG.494.1	MSTRG.494	Chr00	13726327	13727432	u	1106	0.163751	noncoding	LncRNA
MSTRG.495.1	MSTRG.495	Chr00	13720813	13722058	u	583	0.00706649	noncoding	LncRNA
MSTRG.496.1	MSTRG.496	Chr00	13731951	13732519	u	569	0.153309	noncoding	LncRNA
MSTRG.497.1	MSTRG.497	Chr00	13734571	13735052	u	482	0.350308	noncoding	LncRNA
MSTRG.498.1	MSTRG.498	Chr00	13739917	13745484	n	2689	1	coding	/
MSTRG.498.2	MSTRG.498	Chr00	13739917	13745484	n	2692	1	coding	/
AUR62040547-RA	MSTRG.498	Chr00	13740372	13741532	=	924	1	coding	/
MSTRG.499.1	MSTRG.499	Chr00	13740264	13741803	x	1540	0.50528	coding	/
MSTRG.500.1	MSTRG.500	Chr00	13745679	13750011	j	1398	0.651718	coding	/
MSTRG.500.2	MSTRG.500	Chr00	13746182	13750011	j	860	0.405158	noncoding	LncRNA
AUR62040548-RA	MSTRG.500	Chr00	13747735	13749412	=	264	0.0416968	noncoding	LncRNA
MSTRG.501.1	MSTRG.501	Chr00	13763362	13763580	u	219	0.0103887	noncoding	LncRNA
MSTRG.502.1	MSTRG.502	Chr00	13771071	13771478	u	408	1.22697e-05	noncoding	LncRNA
MSTRG.503.1	MSTRG.503	Chr00	13786208	13786880	u	673	0.0264167	noncoding	LncRNA
MSTRG.504.1	MSTRG.504	Chr00	13787403	13788013	u	611	0.0202911	noncoding	LncRNA
MSTRG.505.1	MSTRG.505	Chr00	13795406	13795768	u	363	0.0523936	noncoding	LncRNA
MSTRG.506.1	MSTRG.506	Chr00	13803169	13803422	u	254	0.121211	noncoding	LncRNA
MSTRG.507.1	MSTRG.507	Chr00	13751815	13761880	n	2714	1	coding	/
MSTRG.507.2	MSTRG.507	Chr00	13751825	13758226	n	1879	1	coding	/
AUR62040549-RA	MSTRG.507	Chr00	13751860	13761880	=	2406	1	coding	/
MSTRG.508.1	MSTRG.508	Chr00	13806189	13807424	u	904	0.632912	coding	/
MSTRG.509.1	MSTRG.509	Chr00	13828372	13828967	u	596	0.0155459	noncoding	LncRNA
MSTRG.510.1	MSTRG.510	Chr00	13833071	13833408	u	338	0.115746	noncoding	LncRNA
MSTRG.511.1	MSTRG.511	Chr00	13812442	13819267	n	4099	1	coding	/
AUR62040550-RA	MSTRG.511	Chr00	13812941	13816161	=	3155	1	coding	/
MSTRG.512.1	MSTRG.512	Chr00	13873114	13873485	u	372	0.0120034	noncoding	LncRNA
MSTRG.513.1	MSTRG.513	Chr00	13912590	13912872	u	283	0.0189152	noncoding	LncRNA
AUR62040554-RA	MSTRG.514	Chr00	13897735	13903300	=	1308	1	coding	/
AUR62040553-RA	MSTRG.515	Chr00	13885645	13892036	=	3452	1	coding	/
MSTRG.516.1	MSTRG.516	Chr00	13913660	13915374	u	1715	1	coding	/
MSTRG.517.1	MSTRG.517	Chr00	13915947	13916220	u	274	0.123492	noncoding	LncRNA
MSTRG.518.1	MSTRG.518	Chr00	13929302	13929797	u	496	0.0153939	noncoding	LncRNA
MSTRG.519.1	MSTRG.519	Chr00	13954674	13955008	u	335	0.102061	noncoding	LncRNA
MSTRG.520.1	MSTRG.520	Chr00	13962156	13962375	u	220	0.0288054	noncoding	LncRNA
MSTRG.521.1	MSTRG.521	Chr00	13843477	13866505	j	3564	1	coding	/
MSTRG.521.2	MSTRG.521	Chr00	13843481	13866505	j	3554	1	coding	/
AUR62040551-RA	MSTRG.521	Chr00	13843818	13850566	=	2247	1	coding	/
MSTRG.522.1	MSTRG.522	Chr00	13859966	13860429	u	464	0.0116237	noncoding	LncRNA
AUR62040552-RA	MSTRG.523	Chr00	13860442	13863339	=	1707	1	coding	/
MSTRG.524.1	MSTRG.524	Chr00	13977698	13978298	u	601	0.147288	noncoding	LncRNA
MSTRG.525.1	MSTRG.525	Chr00	13963210	13963797	u	588	0.0170299	noncoding	LncRNA
MSTRG.526.1	MSTRG.526	Chr00	13975865	13976477	u	613	0.0220181	noncoding	LncRNA
MSTRG.527.1	MSTRG.527	Chr00	13979088	13979390	u	303	0.0148773	noncoding	LncRNA
MSTRG.528.1	MSTRG.528	Chr00	13981904	13982230	u	327	0.0165276	noncoding	LncRNA
MSTRG.529.1	MSTRG.529	Chr00	13989349	13989554	u	206	0.00579755	noncoding	LncRNA
MSTRG.530.1	MSTRG.530	Chr00	14022930	14023373	p	444	0.015491	noncoding	LncRNA
MSTRG.531.1	MSTRG.531	Chr00	14049310	14049940	u	631	0.0210738	noncoding	LncRNA
MSTRG.532.1	MSTRG.532	Chr00	14058268	14058511	u	244	8.31965e-06	noncoding	LncRNA
MSTRG.533.1	MSTRG.533	Chr00	14082583	14082864	u	282	0.00369383	noncoding	LncRNA
MSTRG.534.1	MSTRG.534	Chr00	14099152	14099448	u	297	0.0248669	noncoding	LncRNA
MSTRG.535.1	MSTRG.535	Chr00	14105222	14105736	u	515	0.0100825	noncoding	LncRNA
MSTRG.536.1	MSTRG.536	Chr00	14139684	14140344	u	661	0.0085129	noncoding	LncRNA
AUR62040555-RA	MSTRG.537	Chr00	14024327	14032843	=	1991	1	coding	/
MSTRG.537.2	MSTRG.537	Chr00	14024352	14032685	n	2888	1	coding	/
MSTRG.538.1	MSTRG.538	Chr00	14028219	14028585	i	367	0.0125502	noncoding	LncRNA
MSTRG.539.1	MSTRG.539	Chr00	14119119	14123734	u	455	0.0106703	noncoding	LncRNA
MSTRG.539.2	MSTRG.539	Chr00	14119155	14127857	u	400	0.141323	noncoding	LncRNA
MSTRG.540.1	MSTRG.540	Chr00	14126694	14126995	u	302	0.00818337	noncoding	LncRNA
MSTRG.541.1	MSTRG.541	Chr00	14183365	14183844	u	480	0.0133101	noncoding	LncRNA
MSTRG.542.1	MSTRG.542	Chr00	14141764	14143861	u	2098	0.0527372	noncoding	LncRNA
MSTRG.543.1	MSTRG.543	Chr00	14187528	14187935	u	408	0.0108723	noncoding	LncRNA
MSTRG.544.1	MSTRG.544	Chr00	14206851	14207106	u	256	0.127179	noncoding	LncRNA
MSTRG.545.1	MSTRG.545	Chr00	14188573	14189798	u	598	0.0142627	noncoding	LncRNA
MSTRG.546.1	MSTRG.546	Chr00	14188597	14188883	u	287	0.00479643	noncoding	LncRNA
MSTRG.547.1	MSTRG.547	Chr00	14209800	14210192	u	393	0.00433404	noncoding	LncRNA
MSTRG.548.1	MSTRG.548	Chr00	14210587	14210941	u	355	0.0186032	noncoding	LncRNA
MSTRG.549.1	MSTRG.549	Chr00	14210972	14211263	u	292	0.00401318	noncoding	LncRNA
MSTRG.550.1	MSTRG.550	Chr00	14232684	14232991	u	308	1.14567e-05	noncoding	LncRNA
MSTRG.551.1	MSTRG.551	Chr00	14233657	14234085	u	429	0.0129273	noncoding	LncRNA
MSTRG.552.1	MSTRG.552	Chr00	14218820	14219123	u	304	0.0103921	noncoding	LncRNA
MSTRG.553.1	MSTRG.553	Chr00	14254453	14254822	u	370	0.00347708	noncoding	LncRNA
MSTRG.554.1	MSTRG.554	Chr00	14256001	14256206	u	206	0.018694	noncoding	LncRNA
MSTRG.555.1	MSTRG.555	Chr00	14258463	14259042	u	580	0.00601614	noncoding	LncRNA
MSTRG.556.1	MSTRG.556	Chr00	14260037	14260552	u	516	0.00266853	noncoding	LncRNA
MSTRG.557.1	MSTRG.557	Chr00	14283058	14283512	u	455	9.64301e-06	noncoding	LncRNA
MSTRG.558.1	MSTRG.558	Chr00	14314359	14314671	u	313	0.0144904	noncoding	LncRNA
MSTRG.559.1	MSTRG.559	Chr00	14319336	14319941	u	606	0.00333235	noncoding	LncRNA
MSTRG.560.1	MSTRG.560	Chr00	14322564	14322906	u	343	0.0413587	noncoding	LncRNA
MSTRG.561.1	MSTRG.561	Chr00	14239626	14254061	k	1642	0.230477	noncoding	LncRNA
MSTRG.561.2	MSTRG.561	Chr00	14240132	14254061	k	1198	0.188514	noncoding	LncRNA
MSTRG.561.3	MSTRG.561	Chr00	14240132	14254061	k	1264	0.188514	noncoding	LncRNA
MSTRG.561.4	MSTRG.561	Chr00	14240136	14253397	k	995	0.311419	noncoding	LncRNA
MSTRG.561.5	MSTRG.561	Chr00	14240331	14252074	k	792	0.538412	coding	/
AUR62040557-RA	MSTRG.561	Chr00	14240613	14241023	=	222	0.107507	noncoding	LncRNA
MSTRG.562.1	MSTRG.562	Chr00	14243115	14243368	u	254	0.00297866	noncoding	LncRNA
MSTRG.563.1	MSTRG.563	Chr00	14252649	14253101	u	453	0.00658628	noncoding	LncRNA
MSTRG.564.1	MSTRG.564	Chr00	14332164	14332443	u	280	1.52556e-06	noncoding	LncRNA
MSTRG.565.1	MSTRG.565	Chr00	14338124	14338624	u	501	0.00526482	noncoding	LncRNA
AUR62040559-RA	MSTRG.566	Chr00	14323680	14330035	=	4165	1	coding	/
MSTRG.566.2	MSTRG.566	Chr00	14325210	14325662	n	453	0.131393	noncoding	LncRNA
MSTRG.567.1	MSTRG.567	Chr00	14357497	14357718	u	222	0.0280489	noncoding	LncRNA
MSTRG.568.1	MSTRG.568	Chr00	14363635	14364262	u	628	0.010647	noncoding	LncRNA
MSTRG.569.1	MSTRG.569	Chr00	14366680	14367042	u	363	0.0298052	noncoding	LncRNA
AUR62040561-RA	MSTRG.570	Chr00	14344569	14348668	=	1172	0.99705	coding	/
MSTRG.571.1	MSTRG.571	Chr00	14381730	14382001	u	272	0.00692895	noncoding	LncRNA
MSTRG.572.1	MSTRG.572	Chr00	14386511	14386907	u	397	0.0261614	noncoding	LncRNA
AUR62040563-RA	MSTRG.573	Chr00	14395614	14399172	=	1942	1	coding	/
MSTRG.574.1	MSTRG.574	Chr00	14433411	14433793	u	383	0.0540006	noncoding	LncRNA
MSTRG.575.1	MSTRG.575	Chr00	14452525	14453030	u	506	0.0983499	noncoding	LncRNA
MSTRG.576.1	MSTRG.576	Chr00	14456096	14456871	u	776	0.0174022	noncoding	LncRNA
MSTRG.577.1	MSTRG.577	Chr00	14475822	14476036	u	215	1.72998e-06	noncoding	LncRNA
AUR62040564-RA	MSTRG.578	Chr00	14402490	14405698	=	3111	1	coding	/
MSTRG.579.1	MSTRG.579	Chr00	14407916	14408566	u	651	0.00764928	noncoding	LncRNA
MSTRG.580.1	MSTRG.580	Chr00	14411233	14411662	u	430	0.024037	noncoding	LncRNA
MSTRG.581.1	MSTRG.581	Chr00	14416556	14417301	u	746	0.00392577	noncoding	LncRNA
MSTRG.582.1	MSTRG.582	Chr00	14417934	14418286	u	353	0.177941	noncoding	LncRNA
MSTRG.583.1	MSTRG.583	Chr00	14500944	14501274	u	331	0.00346761	noncoding	LncRNA
MSTRG.584.1	MSTRG.584	Chr00	14502405	14503212	u	808	0.131381	noncoding	LncRNA
MSTRG.585.1	MSTRG.585	Chr00	14367918	14381503	j	2920	1	coding	/
MSTRG.585.2	MSTRG.585	Chr00	14367936	14381503	j	2917	1	coding	/
AUR62040562-RA	MSTRG.585	Chr00	14368097	14381503	=	2795	1	coding	/
MSTRG.586.1	MSTRG.586	Chr00	14367940	14368478	x	539	0.0898991	noncoding	LncRNA
MSTRG.587.1	MSTRG.587	Chr00	14374703	14374914	x	212	0.0371286	noncoding	LncRNA
MSTRG.588.1	MSTRG.588	Chr00	14378843	14379063	x	221	0.00620353	noncoding	LncRNA
AUR62040565-RA	MSTRG.589	Chr00	14514292	14516862	=	1848	1	coding	/
MSTRG.589.2	MSTRG.589	Chr00	14516527	14520420	e	3894	0.765975	coding	/
MSTRG.590.1	MSTRG.590	Chr00	14516000	14520421	j	3024	0.999997	coding	/
AUR62040566-RA	MSTRG.590	Chr00	14517163	14520421	=	1654	0.999997	coding	/
MSTRG.591.1	MSTRG.591	Chr00	14551558	14551904	u	347	0.00759924	noncoding	LncRNA
AUR62040567-RA	MSTRG.592	Chr00	14528356	14539835	=	1989	0.999992	coding	/
MSTRG.593.1	MSTRG.593	Chr00	14553919	14554130	u	212	0.0102476	noncoding	LncRNA
MSTRG.594.1	MSTRG.594	Chr00	14556930	14557244	u	315	0.0163921	noncoding	LncRNA
MSTRG.595.1	MSTRG.595	Chr00	14663867	14664317	u	451	0.0534975	noncoding	LncRNA
MSTRG.596.1	MSTRG.596	Chr00	14698542	14698869	u	328	0.153443	noncoding	LncRNA
MSTRG.597.1	MSTRG.597	Chr00	14846459	14846699	u	241	1.72508e-05	noncoding	LncRNA
MSTRG.598.1	MSTRG.598	Chr00	14855865	14856151	u	287	0.0465207	noncoding	LncRNA
MSTRG.599.1	MSTRG.599	Chr00	14858468	14858826	u	359	0.0036334	noncoding	LncRNA
MSTRG.600.1	MSTRG.600	Chr00	14860135	14860811	u	677	0.154312	noncoding	LncRNA
MSTRG.601.1	MSTRG.601	Chr00	14863213	14863418	u	206	0.0128292	noncoding	LncRNA
MSTRG.602.1	MSTRG.602	Chr00	14865242	14866285	u	1044	0.0400709	noncoding	LncRNA
MSTRG.603.1	MSTRG.603	Chr00	14907588	14907919	u	332	0.00756756	noncoding	LncRNA
MSTRG.604.1	MSTRG.604	Chr00	15026635	15027133	u	499	0.0700683	noncoding	LncRNA
MSTRG.605.1	MSTRG.605	Chr00	15050810	15051163	u	354	0.0370711	noncoding	LncRNA
MSTRG.606.1	MSTRG.606	Chr00	15051400	15051611	u	212	0.0100652	noncoding	LncRNA
MSTRG.607.1	MSTRG.607	Chr00	15064129	15064470	u	342	0.0358067	noncoding	LncRNA
MSTRG.608.1	MSTRG.608	Chr00	15075735	15076346	u	612	0.148218	noncoding	LncRNA
MSTRG.609.1	MSTRG.609	Chr00	15081668	15082418	u	751	0.0257079	noncoding	LncRNA
MSTRG.610.1	MSTRG.610	Chr00	15085033	15085403	u	371	0.00711048	noncoding	LncRNA
MSTRG.611.1	MSTRG.611	Chr00	15138419	15138783	u	365	0.0284106	noncoding	LncRNA
MSTRG.612.1	MSTRG.612	Chr00	15152409	15152656	u	248	0.156007	noncoding	LncRNA
MSTRG.613.1	MSTRG.613	Chr00	15153126	15153359	u	234	0.00719245	noncoding	LncRNA
MSTRG.614.1	MSTRG.614	Chr00	15259265	15259623	u	359	0.00425203	noncoding	LncRNA
MSTRG.615.1	MSTRG.615	Chr00	15328393	15328737	u	345	0.0542428	noncoding	LncRNA
MSTRG.616.1	MSTRG.616	Chr00	15363893	15364215	u	323	0.0334505	noncoding	LncRNA
MSTRG.617.1	MSTRG.617	Chr00	14878326	14905980	j	1112	0.999798	coding	/
MSTRG.617.2	MSTRG.617	Chr00	14892653	14904379	k	8240	1	coding	/
MSTRG.617.3	MSTRG.617	Chr00	14892682	14904379	j	8317	0.999922	coding	/
AUR62043714-RA	MSTRG.617	Chr00	14892789	14895133	=	1900	0.146635	noncoding	LncRNA
AUR62043715-RA	MSTRG.617	Chr00	14896247	14904379	=	4726	1	coding	/
MSTRG.617.6	MSTRG.617	Chr00	14896472	14904686	j	4867	1	coding	/
AUR62043716-RA	MSTRG.617	Chr00	14904944	14905980	=	695	0.999607	coding	/
AUR62043713-RA	MSTRG.618	Chr00	14884377	14886251	=	897	0.999995	coding	/
MSTRG.619.1	MSTRG.619	Chr00	14887885	14888593	p	709	0.0784299	noncoding	LncRNA
MSTRG.620.1	MSTRG.620	Chr00	14892683	14893317	x	635	0.0244642	noncoding	LncRNA
MSTRG.621.1	MSTRG.621	Chr00	14896087	14896441	x	355	0.173914	noncoding	LncRNA
MSTRG.622.1	MSTRG.622	Chr00	14897092	14898426	x	1335	0.0327386	noncoding	LncRNA
MSTRG.623.1	MSTRG.623	Chr00	15704508	15704871	u	364	0.0413593	noncoding	LncRNA
MSTRG.624.1	MSTRG.624	Chr00	15572556	15572852	u	297	0.00416368	noncoding	LncRNA
AUR62044028-RA	MSTRG.625	Chr00	15487599	15491690	=	1220	0.83821	coding	/
MSTRG.625.2	MSTRG.625	Chr00	15487636	15488405	n	591	0.0673495	noncoding	LncRNA
MSTRG.626.1	MSTRG.626	Chr00	15487633	15488261	x	629	0.0973592	noncoding	LncRNA
AUR62044027-RA	MSTRG.627	Chr00	15474072	15481911	=	1025	0.999997	coding	/
MSTRG.627.2	MSTRG.627	Chr00	15478376	15481911	j	1144	0.999949	coding	/
MSTRG.627.3	MSTRG.627	Chr00	15478384	15481911	n	1254	0.966865	coding	/
MSTRG.627.4	MSTRG.627	Chr00	15478451	15481911	n	1155	0.996077	coding	/
MSTRG.628.1	MSTRG.628	Chr00	15478371	15478807	i	437	0.0123529	noncoding	LncRNA
MSTRG.629.1	MSTRG.629	Chr00	15775394	15775764	u	371	0.00920842	noncoding	LncRNA
MSTRG.630.1	MSTRG.630	Chr00	15777540	15777914	u	375	0.0159166	noncoding	LncRNA
MSTRG.631.1	MSTRG.631	Chr00	15772692	15773814	x	1123	0.0119966	noncoding	LncRNA
AUR62040280-RA	MSTRG.632	Chr00	15772812	15773369	=	558	0.994998	coding	/
MSTRG.633.1	MSTRG.633	Chr00	15811654	15812249	u	596	0.150049	noncoding	LncRNA
MSTRG.634.1	MSTRG.634	Chr00	15822563	15823045	u	483	0.233907	noncoding	LncRNA
MSTRG.635.1	MSTRG.635	Chr00	15824608	15825519	u	912	0.0464139	noncoding	LncRNA
MSTRG.636.1	MSTRG.636	Chr00	15829831	15830284	u	454	0.0121204	noncoding	LncRNA
MSTRG.637.1	MSTRG.637	Chr00	15785304	15786909	x	1606	0.232943	noncoding	LncRNA
AUR62040282-RA	MSTRG.638	Chr00	15785874	15797155	=	2041	1	coding	/
MSTRG.639.1	MSTRG.639	Chr00	15789071	15789396	i	326	0.0132026	noncoding	LncRNA
MSTRG.640.1	MSTRG.640	Chr00	15832302	15832589	u	288	0.00594848	noncoding	LncRNA
MSTRG.641.1	MSTRG.641	Chr00	15830881	15831175	u	295	0.00314938	noncoding	LncRNA
MSTRG.642.1	MSTRG.642	Chr00	15831358	15831610	u	253	0.0344619	noncoding	LncRNA
AUR62040284-RA	MSTRG.643	Chr00	15834318	15838365	=	3544	1	coding	/
AUR62040285-RA	MSTRG.644	Chr00	15839966	15849846	=	2609	1	coding	/
MSTRG.644.2	MSTRG.644	Chr00	15839969	15849846	j	2870	1	coding	/
MSTRG.645.1	MSTRG.645	Chr00	15842171	15842444	i	274	0.00493012	noncoding	LncRNA
MSTRG.646.1	MSTRG.646	Chr00	15846260	15846613	x	354	0.0206877	noncoding	LncRNA
MSTRG.647.1	MSTRG.647	Chr00	15847013	15847438	i	426	0.0122738	noncoding	LncRNA
MSTRG.648.1	MSTRG.648	Chr00	15865110	15865494	u	385	0.123977	noncoding	LncRNA
MSTRG.649.1	MSTRG.649	Chr00	15863982	15864710	u	729	0.316606	noncoding	LncRNA
MSTRG.650.1	MSTRG.650	Chr00	15883730	15884082	u	353	0.0216749	noncoding	LncRNA
MSTRG.651.1	MSTRG.651	Chr00	15852681	15853488	u	808	0.0491474	noncoding	LncRNA
MSTRG.652.1	MSTRG.652	Chr00	15853177	15858812	j	2239	1	coding	/
MSTRG.652.2	MSTRG.652	Chr00	15853231	15858812	j	2198	0.99846	coding	/
AUR62040286-RA	MSTRG.652	Chr00	15853728	15858812	=	1903	1	coding	/
MSTRG.653.1	MSTRG.653	Chr00	15854483	15854832	x	350	0.00988309	noncoding	LncRNA
MSTRG.654.1	MSTRG.654	Chr00	15856309	15856644	x	336	0.00561241	noncoding	LncRNA
MSTRG.655.1	MSTRG.655	Chr00	15889818	15890185	u	368	0.0195308	noncoding	LncRNA
MSTRG.656.1	MSTRG.656	Chr00	15891284	15891486	u	203	0.157257	noncoding	LncRNA
MSTRG.657.1	MSTRG.657	Chr00	15891751	15892245	u	495	0.163381	noncoding	LncRNA
MSTRG.658.1	MSTRG.658	Chr00	15870820	15875069	m	3817	1	coding	/
AUR62040287-RA	MSTRG.658	Chr00	15870843	15875069	=	3689	1	coding	/
MSTRG.659.1	MSTRG.659	Chr00	15870874	15872335	x	1462	0.479799	noncoding	LncRNA
MSTRG.660.1	MSTRG.660	Chr00	15928980	15929877	u	898	0.00682996	noncoding	LncRNA
MSTRG.661.1	MSTRG.661	Chr00	15929924	15930458	u	535	0.0117834	noncoding	LncRNA
MSTRG.662.1	MSTRG.662	Chr00	15957445	15957831	u	387	0.00318553	noncoding	LncRNA
MSTRG.663.1	MSTRG.663	Chr00	15959621	15959972	u	352	0.0298951	noncoding	LncRNA
MSTRG.664.1	MSTRG.664	Chr00	15970724	15971066	u	343	0.00591102	noncoding	LncRNA
MSTRG.665.1	MSTRG.665	Chr00	15986060	15986284	u	225	0.175765	noncoding	LncRNA
MSTRG.666.1	MSTRG.666	Chr00	16001917	16002269	u	353	0.0115654	noncoding	LncRNA
MSTRG.667.1	MSTRG.667	Chr00	16017300	16017652	u	353	0.0115654	noncoding	LncRNA
MSTRG.668.1	MSTRG.668	Chr00	16026955	16027242	u	288	0.00336127	noncoding	LncRNA
MSTRG.669.1	MSTRG.669	Chr00	16032057	16032354	u	298	0.00796129	noncoding	LncRNA
MSTRG.670.1	MSTRG.670	Chr00	16033317	16033747	u	431	0.0123567	noncoding	LncRNA
MSTRG.671.1	MSTRG.671	Chr00	16056382	16056586	u	205	0.0254394	noncoding	LncRNA
MSTRG.672.1	MSTRG.672	Chr00	16085315	16085522	u	208	0.0208366	noncoding	LncRNA
MSTRG.673.1	MSTRG.673	Chr00	16096389	16096741	u	353	0.0451672	noncoding	LncRNA
MSTRG.674.1	MSTRG.674	Chr00	16065217	16076369	j	2623	1	coding	/
AUR62040290-RA	MSTRG.674	Chr00	16065559	16076369	=	2272	1	coding	/
MSTRG.675.1	MSTRG.675	Chr00	16076039	16076277	x	239	0.0289264	noncoding	LncRNA
MSTRG.676.1	MSTRG.676	Chr00	16034571	16036136	n	1118	0.106224	noncoding	LncRNA
AUR62040288-RA	MSTRG.676	Chr00	16035044	16045679	=	1881	1	coding	/
MSTRG.676.3	MSTRG.676	Chr00	16038014	16044385	j	1450	1	coding	/
MSTRG.676.4	MSTRG.676	Chr00	16038031	16044385	j	1565	1	coding	/
MSTRG.676.5	MSTRG.676	Chr00	16038167	16044385	j	1591	1	coding	/
MSTRG.676.6	MSTRG.676	Chr00	16039669	16044385	j	1679	1	coding	/
MSTRG.676.7	MSTRG.676	Chr00	16039671	16044385	j	1680	1	coding	/
MSTRG.677.1	MSTRG.677	Chr00	16038041	16038349	i	309	0.0414581	noncoding	LncRNA
MSTRG.678.1	MSTRG.678	Chr00	16039709	16040381	i	673	0.0205575	noncoding	LncRNA
MSTRG.679.1	MSTRG.679	Chr00	16045578	16055959	j	1402	1	coding	/
AUR62040289-RA	MSTRG.679	Chr00	16045796	16055959	=	1170	1	coding	/
MSTRG.680.1	MSTRG.680	Chr00	16156197	16156482	u	286	0.017907	noncoding	LncRNA
MSTRG.681.1	MSTRG.681	Chr00	16159766	16160076	p	311	0.0460537	noncoding	LncRNA
MSTRG.682.1	MSTRG.682	Chr00	16111515	16111972	u	458	0.00370916	noncoding	LncRNA
AUR62040291-RA	MSTRG.683	Chr00	16112249	16128470	=	2217	1	coding	/
MSTRG.683.2	MSTRG.683	Chr00	16123156	16128470	n	2089	1	coding	/
MSTRG.684.1	MSTRG.684	Chr00	16121777	16122040	i	264	0.0137755	noncoding	LncRNA
MSTRG.685.1	MSTRG.685	Chr00	16128029	16128558	x	530	0.00526916	noncoding	LncRNA
MSTRG.686.1	MSTRG.686	Chr00	16160922	16161138	u	217	0.122441	noncoding	LncRNA
MSTRG.687.1	MSTRG.687	Chr00	16157413	16159305	j	1787	1	coding	/
AUR62040293-RA	MSTRG.687	Chr00	16157542	16159305	=	1463	1	coding	/
MSTRG.688.1	MSTRG.688	Chr00	16193307	16193660	u	354	0.00786506	noncoding	LncRNA
AUR62040294-RA	MSTRG.689	Chr00	16183493	16192872	=	1012	0.984573	coding	/
MSTRG.689.2	MSTRG.689	Chr00	16183536	16192872	j	1017	0.997751	coding	/
AUR62040296-RA	MSTRG.690	Chr00	16194615	16201106	=	1938	1	coding	/
MSTRG.690.2	MSTRG.690	Chr00	16194649	16202069	j	1957	1	coding	/
MSTRG.690.3	MSTRG.690	Chr00	16194649	16202069	j	1954	1	coding	/
MSTRG.691.1	MSTRG.691	Chr00	16260759	16261255	u	497	0.0202598	noncoding	LncRNA
MSTRG.692.1	MSTRG.692	Chr00	16253777	16254046	u	270	0.00516764	noncoding	LncRNA
AUR62040299-RA	MSTRG.693	Chr00	16254159	16254590	=	312	0.345676	noncoding	LncRNA
MSTRG.694.1	MSTRG.694	Chr00	16262513	16262802	u	290	0.134683	noncoding	LncRNA
MSTRG.695.1	MSTRG.695	Chr00	16263031	16263327	u	297	0.0292914	noncoding	LncRNA
MSTRG.696.1	MSTRG.696	Chr00	16264560	16264948	u	389	0.0172845	noncoding	LncRNA
MSTRG.697.1	MSTRG.697	Chr00	16269044	16270008	p	965	0.0985322	noncoding	LncRNA
MSTRG.698.1	MSTRG.698	Chr00	16208710	16253069	j	2065	1	coding	/
MSTRG.698.2	MSTRG.698	Chr00	16248156	16253069	j	1309	0.510846	coding	/
AUR62040298-RA	MSTRG.698	Chr00	16249568	16253069	=	1384	0.999932	coding	/
MSTRG.699.1	MSTRG.699	Chr00	16220525	16220787	u	263	0.0191766	noncoding	LncRNA
MSTRG.700.1	MSTRG.700	Chr00	16240300	16240566	u	267	0.0293244	noncoding	LncRNA
MSTRG.701.1	MSTRG.701	Chr00	16249091	16249922	x	832	0.0163023	noncoding	LncRNA
MSTRG.702.1	MSTRG.702	Chr00	16273959	16274567	u	609	0.0871982	noncoding	LncRNA
MSTRG.703.1	MSTRG.703	Chr00	16274931	16275328	u	398	0.0647118	noncoding	LncRNA
MSTRG.704.1	MSTRG.704	Chr00	16281312	16281726	u	415	0.00710346	noncoding	LncRNA
MSTRG.705.1	MSTRG.705	Chr00	16294344	16295040	p	697	0.0296126	noncoding	LncRNA
MSTRG.706.1	MSTRG.706	Chr00	16305633	16306062	u	430	0.008524	noncoding	LncRNA
MSTRG.707.1	MSTRG.707	Chr00	16308008	16308484	u	477	0.00916222	noncoding	LncRNA
MSTRG.708.1	MSTRG.708	Chr00	16296350	16303866	j	1842	1	coding	/
AUR62040302-RA	MSTRG.708	Chr00	16296361	16303866	=	1732	1	coding	/
AUR62040301-RA	MSTRG.709	Chr00	16283516	16293326	=	2295	1	coding	/
MSTRG.709.2	MSTRG.709	Chr00	16283585	16293326	j	2232	1	coding	/
MSTRG.710.1	MSTRG.710	Chr00	16283530	16284007	x	478	0.0348369	noncoding	LncRNA
MSTRG.711.1	MSTRG.711	Chr00	16329378	16329663	u	286	0.00697159	noncoding	LncRNA
MSTRG.712.1	MSTRG.712	Chr00	16330931	16331301	u	371	0.00336691	noncoding	LncRNA
MSTRG.713.1	MSTRG.713	Chr00	16331262	16332974	j	1446	1	coding	/
MSTRG.713.2	MSTRG.713	Chr00	16331273	16332974	j	1431	0.999462	coding	/
AUR62040305-RA	MSTRG.713	Chr00	16331410	16331874	=	270	0.205675	noncoding	LncRNA
MSTRG.714.1	MSTRG.714	Chr00	16309356	16319145	m	4633	1	coding	/
MSTRG.714.2	MSTRG.714	Chr00	16309361	16310329	o	661	0.0406806	noncoding	LncRNA
MSTRG.714.3	MSTRG.714	Chr00	16309374	16319539	j	4648	1	coding	/
AUR62040303-RA	MSTRG.714	Chr00	16309999	16319145	=	3916	1	coding	/
MSTRG.715.1	MSTRG.715	Chr00	16309360	16310115	x	756	0.0230168	noncoding	LncRNA
AUR62040304-RA	MSTRG.716	Chr00	16319383	16321057	=	628	0.258244	noncoding	LncRNA
MSTRG.717.1	MSTRG.717	Chr00	16337462	16349566	j	2702	1	coding	/
MSTRG.717.2	MSTRG.717	Chr00	16337462	16349566	j	2712	1	coding	/
AUR62040306-RA	MSTRG.717	Chr00	16337650	16349566	=	2367	1	coding	/
MSTRG.718.1	MSTRG.718	Chr00	16340580	16341065	i	486	0.0435203	noncoding	LncRNA
MSTRG.719.1	MSTRG.719	Chr00	16342311	16342551	x	241	0.0123389	noncoding	LncRNA
MSTRG.720.1	MSTRG.720	Chr00	16350836	16358398	j	2778	1	coding	/
AUR62040307-RA	MSTRG.720	Chr00	16350929	16358398	=	2560	1	coding	/
MSTRG.721.1	MSTRG.721	Chr00	16357324	16358382	x	1059	0.0447935	noncoding	LncRNA
MSTRG.722.1	MSTRG.722	Chr00	16370369	16370622	u	254	0.010829	noncoding	LncRNA
MSTRG.723.1	MSTRG.723	Chr00	16372009	16372312	u	304	0.0242943	noncoding	LncRNA
MSTRG.724.1	MSTRG.724	Chr00	16378855	16379327	u	473	0.113914	noncoding	LncRNA
MSTRG.725.1	MSTRG.725	Chr00	16381388	16381641	u	254	0.010829	noncoding	LncRNA
MSTRG.726.1	MSTRG.726	Chr00	16361166	16365017	j	1290	0.563012	coding	/
MSTRG.726.2	MSTRG.726	Chr00	16361194	16363849	j	936	0.261019	noncoding	LncRNA
MSTRG.726.3	MSTRG.726	Chr00	16361280	16365017	j	1061	0.158078	noncoding	LncRNA
AUR62040308-RA	MSTRG.726	Chr00	16361483	16365017	=	931	0.999633	coding	/
MSTRG.726.5	MSTRG.726	Chr00	16363057	16363774	j	374	0.385603	noncoding	LncRNA
MSTRG.727.1	MSTRG.727	Chr00	16361312	16361614	x	303	0.00482306	noncoding	LncRNA
MSTRG.728.1	MSTRG.728	Chr00	16425813	16426073	u	261	0.00392974	noncoding	LncRNA
MSTRG.729.1	MSTRG.729	Chr00	16396188	16410291	x	313	0.0149335	noncoding	LncRNA
AUR62040309-RA	MSTRG.730	Chr00	16398026	16398496	=	471	0.965602	coding	/
MSTRG.731.1	MSTRG.731	Chr00	16404494	16404860	u	367	0.00531742	noncoding	LncRNA
AUR62040310-RA	MSTRG.732	Chr00	16410020	16416896	=	2244	1	coding	/
MSTRG.733.1	MSTRG.733	Chr00	16426305	16428041	x	1737	0.142206	noncoding	LncRNA
AUR62040311-RA	MSTRG.734	Chr00	16426915	16427919	=	1005	1	coding	/
MSTRG.735.1	MSTRG.735	Chr00	16444738	16444961	u	224	0.0326835	noncoding	LncRNA
MSTRG.736.1	MSTRG.736	Chr00	16450776	16451089	u	314	0.0149749	noncoding	LncRNA
MSTRG.737.1	MSTRG.737	Chr00	16453497	16453828	u	332	0.0645804	noncoding	LncRNA
MSTRG.738.1	MSTRG.738	Chr00	16433965	16442353	j	1516	0.999969	coding	/
MSTRG.738.2	MSTRG.738	Chr00	16433965	16442353	j	1507	0.99997	coding	/
MSTRG.738.3	MSTRG.738	Chr00	16433974	16442353	j	1501	0.99997	coding	/
AUR62040313-RA	MSTRG.738	Chr00	16434395	16442353	=	1282	0.999976	coding	/
MSTRG.739.1	MSTRG.739	Chr00	16471801	16472047	u	247	0.0103843	noncoding	LncRNA
MSTRG.740.1	MSTRG.740	Chr00	16459495	16462126	x	2632	0.324057	noncoding	LncRNA
AUR62040314-RA	MSTRG.741	Chr00	16460208	16461743	=	1461	1	coding	/
AUR62040316-RA	MSTRG.742	Chr00	16481305	16484714	=	2127	1	coding	/
MSTRG.743.1	MSTRG.743	Chr00	16482333	16482675	x	343	0.0214215	noncoding	LncRNA
AUR62040315-RA	MSTRG.744	Chr00	16473185	16479438	=	2304	1	coding	/
MSTRG.745.1	MSTRG.745	Chr00	16475199	16475576	x	378	0.0164479	noncoding	LncRNA
MSTRG.746.1	MSTRG.746	Chr00	16492401	16492984	u	584	0.0209692	noncoding	LncRNA
MSTRG.747.1	MSTRG.747	Chr00	16501406	16501719	u	314	0.0149749	noncoding	LncRNA
MSTRG.748.1	MSTRG.748	Chr00	16522518	16523150	u	633	0.24116	noncoding	LncRNA
MSTRG.749.1	MSTRG.749	Chr00	16670609	16671615	u	1007	0.116634	noncoding	LncRNA
MSTRG.750.1	MSTRG.750	Chr00	16510151	16510522	u	372	0.0147288	noncoding	LncRNA
MSTRG.751.1	MSTRG.751	Chr00	16510590	16512848	m	2259	1	coding	/
AUR62040317-RA	MSTRG.751	Chr00	16510867	16512848	=	1907	1	coding	/
MSTRG.752.1	MSTRG.752	Chr00	16837777	16838430	u	654	0.289342	noncoding	LncRNA
MSTRG.753.1	MSTRG.753	Chr00	16904481	16904943	u	463	0.0370911	noncoding	LncRNA
MSTRG.754.1	MSTRG.754	Chr00	16912881	16913175	u	295	0.043214	noncoding	LncRNA
MSTRG.755.1	MSTRG.755	Chr00	17254122	17254854	u	733	0.021753	noncoding	LncRNA
AUR62044278-RA	MSTRG.756	Chr00	17222218	17234311	=	2502	0.999973	coding	/
MSTRG.757.1	MSTRG.757	Chr00	17223123	17223653	i	531	0.00606907	noncoding	LncRNA
MSTRG.758.1	MSTRG.758	Chr00	17232259	17232490	i	232	0.00966226	noncoding	LncRNA
AUR62044277-RA	MSTRG.759	Chr00	17212718	17221777	=	2826	0.999927	coding	/
MSTRG.759.2	MSTRG.759	Chr00	17212990	17221777	m	2640	0.999161	coding	/
MSTRG.760.1	MSTRG.760	Chr00	17213011	17213236	x	226	0.0961287	noncoding	LncRNA
MSTRG.761.1	MSTRG.761	Chr00	17218087	17218422	x	336	0.0051757	noncoding	LncRNA
MSTRG.762.1	MSTRG.762	Chr00	17325632	17326241	u	610	0.0122486	noncoding	LncRNA
MSTRG.763.1	MSTRG.763	Chr00	17330584	17331158	u	575	0.109529	noncoding	LncRNA
AUR62044433-RA	MSTRG.764	Chr00	17310428	17322821	=	2151	1	coding	/
MSTRG.764.2	MSTRG.764	Chr00	17310653	17322821	j	2202	1	coding	/
MSTRG.764.3	MSTRG.764	Chr00	17319349	17322821	j	2278	1	coding	/
MSTRG.764.4	MSTRG.764	Chr00	17319400	17322821	j	2006	1	coding	/
MSTRG.765.1	MSTRG.765	Chr00	17316854	17318318	i	1465	0.0243375	noncoding	LncRNA
MSTRG.766.1	MSTRG.766	Chr00	17489904	17490243	u	340	0.0258005	noncoding	LncRNA
MSTRG.767.1	MSTRG.767	Chr00	17505752	17506049	u	298	0.0232387	noncoding	LncRNA
MSTRG.768.1	MSTRG.768	Chr00	17512890	17513286	u	397	0.0229515	noncoding	LncRNA
MSTRG.769.1	MSTRG.769	Chr00	17690446	17690716	u	271	0.0721232	noncoding	LncRNA
MSTRG.770.1	MSTRG.770	Chr00	17746233	17747008	u	776	0.0269182	noncoding	LncRNA
MSTRG.771.1	MSTRG.771	Chr00	17341512	17400976	j	1744	1	coding	/
AUR62044656-RA	MSTRG.771	Chr00	17397661	17400976	=	2106	1	coding	/
AUR62044244-RA	MSTRG.772	Chr00	17353758	17358776	=	2987	1	coding	/
AUR62044245-RA	MSTRG.773	Chr00	17364384	17364821	=	438	0.885502	coding	/
AUR62044246-RA	MSTRG.774	Chr00	17364876	17365502	=	627	0.992484	coding	/
MSTRG.775.1	MSTRG.775	Chr00	17754626	17754829	u	204	0.052159	noncoding	LncRNA
AUR62044215-RA	MSTRG.776	Chr00	17749397	17750717	=	1107	1	coding	/
MSTRG.777.1	MSTRG.777	Chr00	17749424	17751464	x	2041	0.652943	coding	/
AUR62044216-RA	MSTRG.778	Chr00	17750746	17751325	=	513	0.995634	coding	/
MSTRG.779.1	MSTRG.779	Chr00	17756281	17762086	u	444	0.0323858	noncoding	LncRNA
MSTRG.779.2	MSTRG.779	Chr00	17756344	17765243	u	542	0.0186348	noncoding	LncRNA
MSTRG.780.1	MSTRG.780	Chr00	17756399	17756711	u	313	0.0138187	noncoding	LncRNA
MSTRG.781.1	MSTRG.781	Chr00	17757354	17757734	u	381	0.00748578	noncoding	LncRNA
MSTRG.782.1	MSTRG.782	Chr00	17761352	17761713	u	362	0.00706179	noncoding	LncRNA
MSTRG.783.1	MSTRG.783	Chr00	17762791	17763091	u	301	0.0313484	noncoding	LncRNA
AUR62044217-RA	MSTRG.784	Chr00	17766902	17770125	=	911	0.999876	coding	/
MSTRG.785.1	MSTRG.785	Chr00	17787613	17787826	u	214	0.0151289	noncoding	LncRNA
MSTRG.786.1	MSTRG.786	Chr00	17854472	17854763	u	292	0.0139539	noncoding	LncRNA
MSTRG.787.1	MSTRG.787	Chr00	17857941	17858666	u	726	0.986932	coding	/
MSTRG.788.1	MSTRG.788	Chr00	17782287	17786128	j	3311	1	coding	/
AUR62044651-RA	MSTRG.788	Chr00	17782576	17786128	=	2299	1	coding	/
MSTRG.789.1	MSTRG.789	Chr00	17784199	17786102	x	1904	0.587259	coding	/
MSTRG.790.1	MSTRG.790	Chr00	17958275	17959024	u	750	0.00998655	noncoding	LncRNA
MSTRG.791.1	MSTRG.791	Chr00	17960492	17961018	u	527	0.00871606	noncoding	LncRNA
AUR62044483-RA	MSTRG.792	Chr00	17961619	17962296	=	678	0.999863	coding	/
MSTRG.793.1	MSTRG.793	Chr00	18204154	18204378	u	225	0.180714	noncoding	LncRNA
MSTRG.794.1	MSTRG.794	Chr00	18001740	18002104	u	365	0.162588	noncoding	LncRNA
MSTRG.795.1	MSTRG.795	Chr00	18003265	18003618	u	354	0.0111863	noncoding	LncRNA
MSTRG.796.1	MSTRG.796	Chr00	18274454	18274792	u	339	7.16275e-06	noncoding	LncRNA
MSTRG.797.1	MSTRG.797	Chr00	18294457	18294767	u	311	0.00981613	noncoding	LncRNA
MSTRG.798.1	MSTRG.798	Chr00	18557491	18557713	u	223	1.32894e-05	noncoding	LncRNA
MSTRG.799.1	MSTRG.799	Chr00	18604878	18605286	u	409	0.0157023	noncoding	LncRNA
MSTRG.800.1	MSTRG.800	Chr00	18585664	18589546	u	374	1.89027e-05	noncoding	LncRNA
MSTRG.801.1	MSTRG.801	Chr00	18608955	18609175	u	221	1.41021e-05	noncoding	LncRNA
MSTRG.802.1	MSTRG.802	Chr00	18609790	18610144	u	355	8.7054e-06	noncoding	LncRNA
MSTRG.803.1	MSTRG.803	Chr00	18688779	18689110	u	332	0.0181582	noncoding	LncRNA
MSTRG.804.1	MSTRG.804	Chr00	18806441	18806947	u	507	0.0595574	noncoding	LncRNA
MSTRG.805.1	MSTRG.805	Chr00	18813593	18813831	u	239	0.0212798	noncoding	LncRNA
MSTRG.806.1	MSTRG.806	Chr00	18818399	18818726	u	328	0.0287156	noncoding	LncRNA
MSTRG.807.1	MSTRG.807	Chr00	18819789	18820128	u	340	0.00388652	noncoding	LncRNA
MSTRG.808.1	MSTRG.808	Chr00	18822175	18822515	u	341	0.089885	noncoding	LncRNA
MSTRG.809.1	MSTRG.809	Chr00	18851293	18851543	u	251	0.00605541	noncoding	LncRNA
MSTRG.810.1	MSTRG.810	Chr00	18834147	18836350	x	2204	0.0375169	noncoding	LncRNA
AUR62043428-RA	MSTRG.811	Chr00	18834254	18835225	=	972	1	coding	/
MSTRG.812.1	MSTRG.812	Chr00	18856240	18856848	u	609	0.0452674	noncoding	LncRNA
MSTRG.813.1	MSTRG.813	Chr00	18857234	18857688	u	455	0.0181791	noncoding	LncRNA
MSTRG.814.1	MSTRG.814	Chr00	18862002	18862228	u	227	0.182464	noncoding	LncRNA
MSTRG.815.1	MSTRG.815	Chr00	18862459	18862844	u	386	0.00384787	noncoding	LncRNA
MSTRG.816.1	MSTRG.816	Chr00	18912917	18913249	u	333	0.020184	noncoding	LncRNA
MSTRG.817.1	MSTRG.817	Chr00	18931433	18931830	u	398	0.018673	noncoding	LncRNA
MSTRG.818.1	MSTRG.818	Chr00	18863271	18870092	u	757	0.00709739	noncoding	LncRNA
MSTRG.819.1	MSTRG.819	Chr00	18938294	18938804	u	511	0.0555196	noncoding	LncRNA
MSTRG.820.1	MSTRG.820	Chr00	18940424	18940647	u	224	0.0415849	noncoding	LncRNA
MSTRG.821.1	MSTRG.821	Chr00	18941120	18941647	u	528	0.0114352	noncoding	LncRNA
MSTRG.822.1	MSTRG.822	Chr00	18945116	18945759	u	644	0.0187421	noncoding	LncRNA
MSTRG.823.1	MSTRG.823	Chr00	18952108	18952450	u	343	0.0114048	noncoding	LncRNA
MSTRG.824.1	MSTRG.824	Chr00	18952918	18953184	u	267	0.0151266	noncoding	LncRNA
MSTRG.825.1	MSTRG.825	Chr00	18961845	18962282	u	438	0.0114894	noncoding	LncRNA
MSTRG.826.1	MSTRG.826	Chr00	18977418	18978069	u	652	0.0218946	noncoding	LncRNA
MSTRG.827.1	MSTRG.827	Chr00	18983099	18983534	u	436	0.0186638	noncoding	LncRNA
MSTRG.828.1	MSTRG.828	Chr00	18992070	18992569	u	500	0.00968502	noncoding	LncRNA
MSTRG.829.1	MSTRG.829	Chr00	18995348	18995921	u	574	0.0287476	noncoding	LncRNA
MSTRG.830.1	MSTRG.830	Chr00	18997584	18997929	u	346	0.0326891	noncoding	LncRNA
MSTRG.831.1	MSTRG.831	Chr00	19016744	19017073	u	330	3.98456e-06	noncoding	LncRNA
MSTRG.832.1	MSTRG.832	Chr00	19015220	19016164	x	945	0.094747	noncoding	LncRNA
AUR62043429-RA	MSTRG.833	Chr00	19015341	19016108	=	768	0.999974	coding	/
MSTRG.834.1	MSTRG.834	Chr00	19017367	19018786	u	1420	0.707353	coding	/
MSTRG.835.1	MSTRG.835	Chr00	19019079	19020166	u	1088	0.0266786	noncoding	LncRNA
MSTRG.836.1	MSTRG.836	Chr00	19021736	19022089	u	354	0.0164395	noncoding	LncRNA
MSTRG.837.1	MSTRG.837	Chr00	19030933	19032181	u	1249	0.777782	coding	/
MSTRG.838.1	MSTRG.838	Chr00	19042273	19042494	u	222	0.0132365	noncoding	LncRNA
MSTRG.839.1	MSTRG.839	Chr00	19023625	19030150	k	2454	0.960546	coding	/
AUR62043430-RA	MSTRG.839	Chr00	19028738	19030150	k	1413	0.993617	coding	/
MSTRG.840.1	MSTRG.840	Chr00	19053487	19053782	u	296	0.0311161	noncoding	LncRNA
MSTRG.841.1	MSTRG.841	Chr00	19057573	19059271	u	1699	0.039272	noncoding	LncRNA
MSTRG.842.1	MSTRG.842	Chr00	19060040	19060515	u	476	7.77886e-07	noncoding	LncRNA
MSTRG.843.1	MSTRG.843	Chr00	19090971	19091388	u	418	0.109717	noncoding	LncRNA
MSTRG.844.1	MSTRG.844	Chr00	19093791	19094159	u	369	0.0739451	noncoding	LncRNA
MSTRG.845.1	MSTRG.845	Chr00	19110050	19110386	u	337	0.0108434	noncoding	LncRNA
MSTRG.846.1	MSTRG.846	Chr00	19110700	19110997	u	298	0.0236494	noncoding	LncRNA
MSTRG.847.1	MSTRG.847	Chr00	19122172	19122444	u	273	0.00647765	noncoding	LncRNA
MSTRG.848.1	MSTRG.848	Chr00	19129614	19129872	u	259	0.132449	noncoding	LncRNA
MSTRG.849.1	MSTRG.849	Chr00	19133299	19133654	u	356	0.0586552	noncoding	LncRNA
MSTRG.850.1	MSTRG.850	Chr00	19140668	19140945	u	278	0.0147741	noncoding	LncRNA
MSTRG.851.1	MSTRG.851	Chr00	19146957	19147527	u	571	0.16	noncoding	LncRNA
MSTRG.852.1	MSTRG.852	Chr00	19156199	19156654	u	456	0.088865	noncoding	LncRNA
MSTRG.853.1	MSTRG.853	Chr00	19157301	19157769	u	469	0.136456	noncoding	LncRNA
MSTRG.854.1	MSTRG.854	Chr00	19159543	19159862	u	320	0.00505305	noncoding	LncRNA
MSTRG.855.1	MSTRG.855	Chr00	19162049	19162568	u	520	0.0238038	noncoding	LncRNA
MSTRG.856.1	MSTRG.856	Chr00	19174905	19175637	u	733	0.0774466	noncoding	LncRNA
MSTRG.857.1	MSTRG.857	Chr00	19187895	19188133	u	239	0.0156545	noncoding	LncRNA
MSTRG.858.1	MSTRG.858	Chr00	19188910	19189406	u	497	0.00669322	noncoding	LncRNA
MSTRG.859.1	MSTRG.859	Chr00	19203106	19203383	u	278	0.0514746	noncoding	LncRNA
MSTRG.860.1	MSTRG.860	Chr00	19203783	19204296	u	514	0.462887	noncoding	LncRNA
MSTRG.861.1	MSTRG.861	Chr00	19239302	19239626	u	214	0.0180008	noncoding	LncRNA
MSTRG.862.1	MSTRG.862	Chr00	19254798	19254999	u	202	0.0181564	noncoding	LncRNA
MSTRG.863.1	MSTRG.863	Chr00	19260062	19260281	u	220	0.0084946	noncoding	LncRNA
MSTRG.864.1	MSTRG.864	Chr00	19270328	19270529	u	202	0.0181564	noncoding	LncRNA
MSTRG.865.1	MSTRG.865	Chr00	19291348	19291918	u	571	0.0291133	noncoding	LncRNA
MSTRG.866.1	MSTRG.866	Chr00	19315325	19316192	u	868	0.00901075	noncoding	LncRNA
MSTRG.867.1	MSTRG.867	Chr00	19214661	19218597	u	1258	0.0688272	noncoding	LncRNA
MSTRG.867.2	MSTRG.867	Chr00	19214664	19218597	u	1095	0.206773	noncoding	LncRNA
MSTRG.867.3	MSTRG.867	Chr00	19214664	19218597	u	1153	0.0552559	noncoding	LncRNA
MSTRG.867.4	MSTRG.867	Chr00	19214672	19218597	u	1243	0.0565935	noncoding	LncRNA
MSTRG.868.1	MSTRG.868	Chr00	19325647	19325990	u	344	0.047954	noncoding	LncRNA
MSTRG.869.1	MSTRG.869	Chr00	19321156	19321509	u	354	1.12918e-05	noncoding	LncRNA
MSTRG.870.1	MSTRG.870	Chr00	19336197	19336408	u	212	0.00342951	noncoding	LncRNA
MSTRG.871.1	MSTRG.871	Chr00	19349771	19350341	u	571	0.166084	noncoding	LncRNA
MSTRG.872.1	MSTRG.872	Chr00	19352025	19352355	u	331	0.0128333	noncoding	LncRNA
MSTRG.873.1	MSTRG.873	Chr00	19354491	19354762	u	272	0.0138336	noncoding	LncRNA
MSTRG.874.1	MSTRG.874	Chr00	19396094	19396426	u	333	0.0166736	noncoding	LncRNA
MSTRG.875.1	MSTRG.875	Chr00	19397091	19397342	u	252	0.0137419	noncoding	LncRNA
MSTRG.876.1	MSTRG.876	Chr00	19406930	19407153	u	224	0.0951175	noncoding	LncRNA
MSTRG.877.1	MSTRG.877	Chr00	19410641	19411104	u	464	0.0108547	noncoding	LncRNA
MSTRG.878.1	MSTRG.878	Chr00	19411346	19411561	u	216	1.1551e-05	noncoding	LncRNA
MSTRG.879.1	MSTRG.879	Chr00	19377074	19377862	x	789	0.0463552	noncoding	LncRNA
AUR62043431-RA	MSTRG.880	Chr00	19377126	19377569	=	444	0.956548	coding	/
MSTRG.881.1	MSTRG.881	Chr00	19378834	19394762	j	1842	1	coding	/
AUR62043432-RA	MSTRG.881	Chr00	19379145	19380772	=	939	1	coding	/
MSTRG.882.1	MSTRG.882	Chr00	19379072	19379931	x	860	0.463455	noncoding	LncRNA
MSTRG.883.1	MSTRG.883	Chr00	19394291	19394593	u	303	0.0194987	noncoding	LncRNA
MSTRG.884.1	MSTRG.884	Chr00	19430358	19430710	u	353	0.0273924	noncoding	LncRNA
MSTRG.885.1	MSTRG.885	Chr00	19414431	19414721	u	291	0.00994954	noncoding	LncRNA
MSTRG.886.1	MSTRG.886	Chr00	19435333	19435773	u	441	0.0249792	noncoding	LncRNA
MSTRG.887.1	MSTRG.887	Chr00	19480444	19480783	u	340	0.166589	noncoding	LncRNA
MSTRG.888.1	MSTRG.888	Chr00	19481451	19481800	u	350	0.00314064	noncoding	LncRNA
MSTRG.889.1	MSTRG.889	Chr00	19483292	19483879	u	588	0.00986963	noncoding	LncRNA
MSTRG.890.1	MSTRG.890	Chr00	19493305	19493949	u	645	0.00454167	noncoding	LncRNA
MSTRG.891.1	MSTRG.891	Chr00	19530153	19530469	u	317	0.0307277	noncoding	LncRNA
MSTRG.892.1	MSTRG.892	Chr00	19536856	19537229	u	374	0.0113988	noncoding	LncRNA
MSTRG.893.1	MSTRG.893	Chr00	19499517	19502359	u	914	0.0291012	noncoding	LncRNA
MSTRG.893.2	MSTRG.893	Chr00	19499592	19500955	u	559	0.0174608	noncoding	LncRNA
MSTRG.894.1	MSTRG.894	Chr00	19551220	19552164	u	945	0.0265859	noncoding	LncRNA
MSTRG.895.1	MSTRG.895	Chr00	19554673	19554942	u	270	0.155843	noncoding	LncRNA
MSTRG.896.1	MSTRG.896	Chr00	19559206	19559922	u	717	0.107379	noncoding	LncRNA
MSTRG.897.1	MSTRG.897	Chr00	19560418	19560883	u	466	0.00304009	noncoding	LncRNA
MSTRG.898.1	MSTRG.898	Chr00	19598597	19599037	p	441	0.00950116	noncoding	LncRNA
MSTRG.899.1	MSTRG.899	Chr00	19603125	19603683	u	559	0.00305069	noncoding	LncRNA
MSTRG.900.1	MSTRG.900	Chr00	19605537	19605873	u	337	0.011298	noncoding	LncRNA
MSTRG.901.1	MSTRG.901	Chr00	19563812	19564603	u	792	0.0324673	noncoding	LncRNA
MSTRG.902.1	MSTRG.902	Chr00	19563818	19575871	j	1603	0.998766	coding	/
MSTRG.902.2	MSTRG.902	Chr00	19570378	19575871	j	1052	0.730171	coding	/
AUR62043434-RA	MSTRG.902	Chr00	19574734	19575871	=	864	0.801851	coding	/
AUR62043433-RA	MSTRG.903	Chr00	19567247	19569178	=	1932	1	coding	/
MSTRG.904.1	MSTRG.904	Chr00	19628423	19628731	u	309	0.0136235	noncoding	LncRNA
AUR62043436-RA	MSTRG.905	Chr00	19617185	19621218	=	1099	0.999911	coding	/
MSTRG.905.2	MSTRG.905	Chr00	19617214	19622585	j	2214	1	coding	/
MSTRG.906.1	MSTRG.906	Chr00	19624828	19626524	u	739	0.0216688	noncoding	LncRNA
MSTRG.906.2	MSTRG.906	Chr00	19624828	19626524	u	780	0.0207507	noncoding	LncRNA
AUR62043437-RA	MSTRG.907	Chr00	19629125	19636382	=	765	0.999962	coding	/
MSTRG.908.1	MSTRG.908	Chr00	19634720	19635951	i	1232	0.0851544	noncoding	LncRNA
MSTRG.909.1	MSTRG.909	Chr00	19684085	19684518	u	434	0.0930846	noncoding	LncRNA
MSTRG.910.1	MSTRG.910	Chr00	19687687	19688200	u	514	0.750788	coding	/
MSTRG.911.1	MSTRG.911	Chr00	19693212	19693545	u	334	0.0110541	noncoding	LncRNA
MSTRG.912.1	MSTRG.912	Chr00	19695771	19696663	x	893	0.0366746	noncoding	LncRNA
AUR62043438-RA	MSTRG.913	Chr00	19696410	19699807	=	531	0.99802	coding	/
MSTRG.914.1	MSTRG.914	Chr00	19713278	19714611	u	1334	0.0856818	noncoding	LncRNA
MSTRG.915.1	MSTRG.915	Chr00	19707583	19710851	u	1454	0.998885	coding	/
MSTRG.915.2	MSTRG.915	Chr00	19708443	19710851	u	1207	0.999526	coding	/
MSTRG.916.1	MSTRG.916	Chr00	19709871	19710702	u	832	0.211043	noncoding	LncRNA
MSTRG.917.1	MSTRG.917	Chr00	19717912	19718819	u	908	0.020039	noncoding	LncRNA
MSTRG.918.1	MSTRG.918	Chr00	19738008	19738213	u	206	0.134894	noncoding	LncRNA
MSTRG.919.1	MSTRG.919	Chr00	19739154	19739449	u	296	0.0137008	noncoding	LncRNA
MSTRG.920.1	MSTRG.920	Chr00	19747483	19748045	u	563	0.0092606	noncoding	LncRNA
MSTRG.921.1	MSTRG.921	Chr00	19748338	19749240	u	903	0.0129171	noncoding	LncRNA
MSTRG.922.1	MSTRG.922	Chr00	19756943	19757297	u	355	0.128063	noncoding	LncRNA
MSTRG.923.1	MSTRG.923	Chr00	19802116	19802603	u	488	0.0141732	noncoding	LncRNA
MSTRG.924.1	MSTRG.924	Chr00	19776235	19776518	p	284	0.00595096	noncoding	LncRNA
MSTRG.925.1	MSTRG.925	Chr00	19790384	19790849	u	466	0.0109352	noncoding	LncRNA
MSTRG.926.1	MSTRG.926	Chr00	19794748	19795482	u	735	0.027097	noncoding	LncRNA
MSTRG.927.1	MSTRG.927	Chr00	19819684	19820028	u	345	0.00597511	noncoding	LncRNA
MSTRG.928.1	MSTRG.928	Chr00	19830451	19830776	u	326	0.0937672	noncoding	LncRNA
MSTRG.929.1	MSTRG.929	Chr00	19833104	19833455	u	352	0.029741	noncoding	LncRNA
MSTRG.930.1	MSTRG.930	Chr00	19837995	19838343	u	349	0.0370369	noncoding	LncRNA
MSTRG.931.1	MSTRG.931	Chr00	19846936	19847264	u	329	0.00286276	noncoding	LncRNA
MSTRG.932.1	MSTRG.932	Chr00	19859128	19859460	p	333	0.00538566	noncoding	LncRNA
MSTRG.933.1	MSTRG.933	Chr00	19860535	19861163	u	629	0.0402231	noncoding	LncRNA
MSTRG.934.1	MSTRG.934	Chr00	19855337	19857444	j	2014	1	coding	/
AUR62043441-RA	MSTRG.934	Chr00	19855958	19857444	=	1188	0.999999	coding	/
MSTRG.935.1	MSTRG.935	Chr00	19855877	19856293	x	417	0.00858286	noncoding	LncRNA
MSTRG.936.1	MSTRG.936	Chr00	19872587	19873112	u	526	0.0066721	noncoding	LncRNA
MSTRG.937.1	MSTRG.937	Chr00	19873370	19873673	u	304	0.00487729	noncoding	LncRNA
MSTRG.938.1	MSTRG.938	Chr00	19882416	19882736	u	321	0.0177588	noncoding	LncRNA
MSTRG.939.1	MSTRG.939	Chr00	19885396	19885725	u	330	1.83825e-05	noncoding	LncRNA
MSTRG.940.1	MSTRG.940	Chr00	19887389	19888154	u	766	0.00655641	noncoding	LncRNA
MSTRG.941.1	MSTRG.941	Chr00	19890392	19890817	u	426	0.0245199	noncoding	LncRNA
MSTRG.942.1	MSTRG.942	Chr00	19924767	19925133	u	367	0.0063725	noncoding	LncRNA
MSTRG.943.1	MSTRG.943	Chr00	20011208	20011419	u	212	0.0264854	noncoding	LncRNA
MSTRG.944.1	MSTRG.944	Chr00	20015568	20016545	u	978	0.0262297	noncoding	LncRNA
MSTRG.945.1	MSTRG.945	Chr00	20044592	20044930	u	339	0.00935617	noncoding	LncRNA
MSTRG.946.1	MSTRG.946	Chr00	20130044	20130573	u	530	0.0384318	noncoding	LncRNA
MSTRG.947.1	MSTRG.947	Chr00	20034815	20036506	n	742	0.0185471	noncoding	LncRNA
AUR62043935-RA	MSTRG.947	Chr00	20035082	20040442	=	1050	1	coding	/
MSTRG.948.1	MSTRG.948	Chr00	20371904	20372250	u	347	0.025469	noncoding	LncRNA
AUR62043934-RA	MSTRG.949	Chr00	20027323	20033204	=	2256	1	coding	/
MSTRG.949.2	MSTRG.949	Chr00	20027325	20033204	j	2275	1	coding	/
MSTRG.950.1	MSTRG.950	Chr00	20374331	20374963	u	224	0.00457413	noncoding	LncRNA
MSTRG.951.1	MSTRG.951	Chr00	20377453	20377964	u	512	1.76259e-05	noncoding	LncRNA
MSTRG.952.1	MSTRG.952	Chr00	20389824	20390397	u	574	0.0255772	noncoding	LncRNA
MSTRG.953.1	MSTRG.953	Chr00	20404904	20405274	u	371	0.00594723	noncoding	LncRNA
MSTRG.954.1	MSTRG.954	Chr00	20384000	20387181	u	593	0.0140403	noncoding	LncRNA
MSTRG.955.1	MSTRG.955	Chr00	20384273	20384704	u	432	0.00761872	noncoding	LncRNA
MSTRG.956.1	MSTRG.956	Chr00	20405984	20406323	u	340	0.0783638	noncoding	LncRNA
MSTRG.957.1	MSTRG.957	Chr00	20407972	20408597	u	626	0.154572	noncoding	LncRNA
MSTRG.958.1	MSTRG.958	Chr00	20590759	20590978	u	220	0.00496214	noncoding	LncRNA
MSTRG.959.1	MSTRG.959	Chr00	20770304	20770600	u	297	0.0124394	noncoding	LncRNA
MSTRG.960.1	MSTRG.960	Chr00	20787319	20788115	u	797	0.164551	noncoding	LncRNA
MSTRG.961.1	MSTRG.961	Chr00	21247407	21247711	u	305	0.142805	noncoding	LncRNA
MSTRG.962.1	MSTRG.962	Chr00	21292403	21292720	u	318	0.0173795	noncoding	LncRNA
MSTRG.963.1	MSTRG.963	Chr00	20777432	20783916	u	2131	0.0482941	noncoding	LncRNA
MSTRG.963.2	MSTRG.963	Chr00	20778507	20783916	u	1182	0.0233071	noncoding	LncRNA
MSTRG.964.1	MSTRG.964	Chr00	20783425	20784822	u	249	0.0184988	noncoding	LncRNA
MSTRG.965.1	MSTRG.965	Chr00	21294062	21294369	u	308	0.00713561	noncoding	LncRNA
MSTRG.966.1	MSTRG.966	Chr00	21301541	21302063	u	523	0.0322194	noncoding	LncRNA
MSTRG.967.1	MSTRG.967	Chr00	21592325	21592625	u	301	0.00427112	noncoding	LncRNA
AUR62044451-RA	MSTRG.968	Chr00	21378216	21387846	=	4394	1	coding	/
MSTRG.968.2	MSTRG.968	Chr00	21379616	21387846	j	3594	0.999969	coding	/
AUR62044449-RA	MSTRG.969	Chr00	21609030	21614053	=	444	0.978706	coding	/
MSTRG.970.1	MSTRG.970	Chr00	21612974	21613216	i	243	0.00836131	noncoding	LncRNA
MSTRG.971.1	MSTRG.971	Chr00	21708173	21708535	u	363	0.00838038	noncoding	LncRNA
MSTRG.972.1	MSTRG.972	Chr00	21720226	21720552	u	327	0.0209057	noncoding	LncRNA
MSTRG.973.1	MSTRG.973	Chr00	21763056	21763888	u	833	0.615362	coding	/
MSTRG.974.1	MSTRG.974	Chr00	21783439	21784016	u	578	0.00390169	noncoding	LncRNA
AUR62044450-RA	MSTRG.975	Chr00	21614531	21618244	=	1099	0.814953	coding	/
MSTRG.976.1	MSTRG.976	Chr00	21614532	21615034	x	503	0.0140389	noncoding	LncRNA
MSTRG.977.1	MSTRG.977	Chr00	21839156	21840112	u	957	0.0158274	noncoding	LncRNA
MSTRG.978.1	MSTRG.978	Chr00	21846259	21846814	u	556	0.0970436	noncoding	LncRNA
MSTRG.979.1	MSTRG.979	Chr00	22003754	22004561	u	808	0.171814	noncoding	LncRNA
MSTRG.980.1	MSTRG.980	Chr00	22030463	22030882	u	420	0.254192	noncoding	LncRNA
MSTRG.981.1	MSTRG.981	Chr00	22119626	22119990	u	365	0.0296641	noncoding	LncRNA
MSTRG.982.1	MSTRG.982	Chr00	22164036	22164378	u	343	0.00986696	noncoding	LncRNA
MSTRG.983.1	MSTRG.983	Chr00	22201380	22201597	p	218	0.164255	noncoding	LncRNA
MSTRG.984.1	MSTRG.984	Chr00	22366101	22366790	u	690	0.00939505	noncoding	LncRNA
MSTRG.985.1	MSTRG.985	Chr00	22380118	22380395	u	278	0.0342909	noncoding	LncRNA
MSTRG.986.1	MSTRG.986	Chr00	22380563	22380967	u	405	0.00323805	noncoding	LncRNA
MSTRG.987.1	MSTRG.987	Chr00	22387232	22387966	u	735	0.396229	noncoding	LncRNA
MSTRG.988.1	MSTRG.988	Chr00	22419281	22419519	u	239	0.00346919	noncoding	LncRNA
AUR62044562-RA	MSTRG.989	Chr00	22202952	22209496	=	2115	0.999974	coding	/
MSTRG.989.2	MSTRG.989	Chr00	22203077	22209033	j	1568	0.99923	coding	/
MSTRG.990.1	MSTRG.990	Chr00	22454630	22456793	m	2164	0.999996	coding	/
AUR62044147-RA	MSTRG.990	Chr00	22455169	22456793	=	1381	0.600677	coding	/
MSTRG.991.1	MSTRG.991	Chr00	22460397	22466263	u	302	0.00277893	noncoding	LncRNA
MSTRG.992.1	MSTRG.992	Chr00	22462746	22462949	u	204	0.0612795	noncoding	LncRNA
MSTRG.993.1	MSTRG.993	Chr00	22466341	22467166	u	319	0.0491474	noncoding	LncRNA
MSTRG.994.1	MSTRG.994	Chr00	22516077	22516894	u	818	0.0720394	noncoding	LncRNA
AUR62044148-RA	MSTRG.995	Chr00	22478273	22490635	=	1673	1	coding	/
MSTRG.995.2	MSTRG.995	Chr00	22487560	22489206	j	790	0.954504	coding	/
MSTRG.996.1	MSTRG.996	Chr00	22713376	22713831	u	456	0.0816067	noncoding	LncRNA
MSTRG.997.1	MSTRG.997	Chr00	22975049	22975398	u	350	0.00897601	noncoding	LncRNA
MSTRG.998.1	MSTRG.998	Chr00	22976453	22976693	u	241	0.0893128	noncoding	LncRNA
MSTRG.999.1	MSTRG.999	Chr00	22991293	22991581	u	289	0.0155076	noncoding	LncRNA
MSTRG.1000.1	MSTRG.1000	Chr00	22995365	22995980	u	616	0.125369	noncoding	LncRNA
MSTRG.1001.1	MSTRG.1001	Chr00	23068972	23069455	u	484	0.0542727	noncoding	LncRNA
MSTRG.1002.1	MSTRG.1002	Chr00	23212095	23212460	u	366	0.0110871	noncoding	LncRNA
MSTRG.1003.1	MSTRG.1003	Chr00	23213801	23214166	u	366	0.0110871	noncoding	LncRNA
AUR62044051-RA	MSTRG.1004	Chr00	23241631	23242807	=	1065	0.999985	coding	/
MSTRG.1005.1	MSTRG.1005	Chr00	23243702	23243936	u	235	0.026298	noncoding	LncRNA
MSTRG.1006.1	MSTRG.1006	Chr00	22540800	22555054	x	278	0.0215052	noncoding	LncRNA
AUR62044296-RA	MSTRG.1007	Chr00	22542624	22544874	=	1023	0.999999	coding	/
MSTRG.1008.1	MSTRG.1008	Chr00	22556557	22556832	p	276	0.0473383	noncoding	LncRNA
AUR62044297-RA	MSTRG.1009	Chr00	22557739	22562028	=	765	0.999962	coding	/
MSTRG.1010.1	MSTRG.1010	Chr00	23258055	23258400	p	346	0.00726749	noncoding	LncRNA
MSTRG.1011.1	MSTRG.1011	Chr00	23245274	23246042	u	769	0.0848846	noncoding	LncRNA
AUR62044053-RA	MSTRG.1012	Chr00	23260667	23260999	=	333	0.696126	coding	/
MSTRG.1013.1	MSTRG.1013	Chr00	23261081	23261345	u	265	0.013319	noncoding	LncRNA
MSTRG.1014.1	MSTRG.1014	Chr00	23261790	23262018	u	229	0.0914826	noncoding	LncRNA
MSTRG.1015.1	MSTRG.1015	Chr00	23315159	23316233	u	1075	0.0971394	noncoding	LncRNA
MSTRG.1016.1	MSTRG.1016	Chr00	23266008	23268923	j	573	0.182205	noncoding	LncRNA
AUR62044054-RA	MSTRG.1016	Chr00	23266158	23268923	=	555	0.99695	coding	/
MSTRG.1017.1	MSTRG.1017	Chr00	23331373	23332045	u	673	0.0140949	noncoding	LncRNA
MSTRG.1018.1	MSTRG.1018	Chr00	23412135	23412779	u	645	0.94174	coding	/
MSTRG.1019.1	MSTRG.1019	Chr00	23479874	23480221	u	348	0.0246438	noncoding	LncRNA
MSTRG.1020.1	MSTRG.1020	Chr00	23637973	23639787	u	516	0.0635048	noncoding	LncRNA
MSTRG.1021.1	MSTRG.1021	Chr00	23647501	23647958	u	458	0.0327837	noncoding	LncRNA
MSTRG.1022.1	MSTRG.1022	Chr00	23889263	23889718	u	456	0.0366749	noncoding	LncRNA
MSTRG.1023.1	MSTRG.1023	Chr00	23983088	23983631	u	544	0.18262	noncoding	LncRNA
MSTRG.1024.1	MSTRG.1024	Chr00	23986091	23986644	u	554	0.00643422	noncoding	LncRNA
MSTRG.1025.1	MSTRG.1025	Chr00	23987204	23987508	u	305	0.0209342	noncoding	LncRNA
MSTRG.1026.1	MSTRG.1026	Chr00	24110033	24110260	u	228	0.031601	noncoding	LncRNA
MSTRG.1027.1	MSTRG.1027	Chr00	23992333	23998580	u	209	1.32849e-05	noncoding	LncRNA
MSTRG.1028.1	MSTRG.1028	Chr00	23992354	23998712	u	393	0.00639492	noncoding	LncRNA
MSTRG.1029.1	MSTRG.1029	Chr00	24169197	24170190	x	994	0.0160587	noncoding	LncRNA
AUR62044679-RA	MSTRG.1030	Chr00	24169946	24170374	=	429	0.96595	coding	/
MSTRG.1031.1	MSTRG.1031	Chr00	24173799	24174359	u	561	0.0205413	noncoding	LncRNA
MSTRG.1032.1	MSTRG.1032	Chr00	24737396	24737737	u	342	0.00851206	noncoding	LncRNA
MSTRG.1033.1	MSTRG.1033	Chr00	24523098	24523567	u	470	0.0253013	noncoding	LncRNA
MSTRG.1034.1	MSTRG.1034	Chr00	24555169	24555611	u	347	0.0378599	noncoding	LncRNA
MSTRG.1035.1	MSTRG.1035	Chr00	24762538	24763113	u	576	0.061077	noncoding	LncRNA
MSTRG.1036.1	MSTRG.1036	Chr00	24947824	24953234	u	345	0.0288104	noncoding	LncRNA
MSTRG.1037.1	MSTRG.1037	Chr00	25045702	25046206	u	505	0.348777	noncoding	LncRNA
AUR62043479-RA	MSTRG.1038	Chr00	24924592	24931635	=	3022	1	coding	/
MSTRG.1038.2	MSTRG.1038	Chr00	24924651	24925971	j	395	0.0405973	noncoding	LncRNA
MSTRG.1038.3	MSTRG.1038	Chr00	24927100	24930176	j	1423	0.868571	coding	/
MSTRG.1038.4	MSTRG.1038	Chr00	24930265	24937548	j	1127	0.999674	coding	/
MSTRG.1039.1	MSTRG.1039	Chr00	24924785	24925275	x	491	0.268977	noncoding	LncRNA
AUR62043480-RA	MSTRG.1040	Chr00	24931661	24934474	=	1363	1	coding	/
MSTRG.1040.2	MSTRG.1040	Chr00	24931805	24933135	j	627	0.996482	coding	/
MSTRG.1041.1	MSTRG.1041	Chr00	24937933	24943772	j	1741	1	coding	/
MSTRG.1041.2	MSTRG.1041	Chr00	24937933	24943772	j	1746	0.999975	coding	/
AUR62043481-RA	MSTRG.1041	Chr00	24938904	24943772	=	1477	1	coding	/
MSTRG.1042.1	MSTRG.1042	Chr00	25266065	25266829	u	616	0.18401	noncoding	LncRNA
AUR62043850-RA	MSTRG.1043	Chr00	25238645	25241568	=	372	0.436047	noncoding	LncRNA
AUR62043851-RA	MSTRG.1044	Chr00	25241017	25245914	=	2777	1	coding	/
MSTRG.1045.1	MSTRG.1045	Chr00	25245201	25245481	x	281	0.146729	noncoding	LncRNA
MSTRG.1046.1	MSTRG.1046	Chr00	25247960	25248634	u	526	0.12816	noncoding	LncRNA
AUR62043852-RA	MSTRG.1047	Chr00	25255285	25258210	=	372	0.436047	noncoding	LncRNA
AUR62043853-RA	MSTRG.1048	Chr00	25257659	25262555	=	2777	1	coding	/
MSTRG.1049.1	MSTRG.1049	Chr00	25435879	25436152	u	274	0.0328525	noncoding	LncRNA
MSTRG.1050.1	MSTRG.1050	Chr00	25448455	25448993	u	539	0.0360326	noncoding	LncRNA
MSTRG.1051.1	MSTRG.1051	Chr00	25569760	25570567	u	808	0.0050414	noncoding	LncRNA
MSTRG.1052.1	MSTRG.1052	Chr00	25588382	25589441	u	1060	0.0299707	noncoding	LncRNA
MSTRG.1053.1	MSTRG.1053	Chr00	25591165	25591499	u	335	0.00592088	noncoding	LncRNA
MSTRG.1054.1	MSTRG.1054	Chr00	25594205	25594617	u	413	0.0204186	noncoding	LncRNA
AUR62044083-RA	MSTRG.1055	Chr00	25572531	25577800	=	931	0.366215	noncoding	LncRNA
MSTRG.1055.2	MSTRG.1055	Chr00	25572538	25577800	m	949	0.968609	coding	/
MSTRG.1056.1	MSTRG.1056	Chr00	25642883	25643178	u	296	0.172581	noncoding	LncRNA
MSTRG.1057.1	MSTRG.1057	Chr00	25659786	25660002	u	217	0.0168101	noncoding	LncRNA
MSTRG.1058.1	MSTRG.1058	Chr00	25661285	25661549	u	265	0.0313271	noncoding	LncRNA
MSTRG.1059.1	MSTRG.1059	Chr00	25678598	25679536	u	939	0.0167858	noncoding	LncRNA
MSTRG.1060.1	MSTRG.1060	Chr00	25742044	25742418	u	375	0.0025748	noncoding	LncRNA
MSTRG.1061.1	MSTRG.1061	Chr00	25776111	25776513	u	403	0.0455632	noncoding	LncRNA
MSTRG.1062.1	MSTRG.1062	Chr00	25788544	25788926	u	383	0.00818709	noncoding	LncRNA
MSTRG.1063.1	MSTRG.1063	Chr00	25848970	25849633	u	664	0.059366	noncoding	LncRNA
MSTRG.1064.1	MSTRG.1064	Chr00	25849182	25849621	u	380	0.00997593	noncoding	LncRNA
MSTRG.1065.1	MSTRG.1065	Chr00	25850191	25850843	u	653	0.0121574	noncoding	LncRNA
MSTRG.1066.1	MSTRG.1066	Chr00	25852408	25853567	u	1160	0.107452	noncoding	LncRNA
MSTRG.1067.1	MSTRG.1067	Chr00	25859319	25859610	u	292	0.00766633	noncoding	LncRNA
MSTRG.1068.1	MSTRG.1068	Chr00	25860510	25860779	u	270	0.00265809	noncoding	LncRNA
MSTRG.1069.1	MSTRG.1069	Chr00	25876788	25877131	u	344	0.011398	noncoding	LncRNA
MSTRG.1070.1	MSTRG.1070	Chr00	25894381	25894790	u	410	0.030192	noncoding	LncRNA
MSTRG.1071.1	MSTRG.1071	Chr00	25596626	25603215	n	3169	1	coding	/
MSTRG.1071.2	MSTRG.1071	Chr00	25596626	25603215	n	3193	1	coding	/
MSTRG.1071.3	MSTRG.1071	Chr00	25596890	25603215	j	2350	1	coding	/
AUR62044084-RA	MSTRG.1071	Chr00	25597052	25603215	=	2519	1	coding	/
MSTRG.1071.5	MSTRG.1071	Chr00	25597093	25599734	j	1159	0.843535	coding	/
MSTRG.1071.6	MSTRG.1071	Chr00	25600539	25603215	j	1223	0.984558	coding	/
MSTRG.1072.1	MSTRG.1072	Chr00	25598591	25599770	x	1180	0.183134	noncoding	LncRNA
MSTRG.1073.1	MSTRG.1073	Chr00	26010192	26010944	u	753	0.0165414	noncoding	LncRNA
MSTRG.1074.1	MSTRG.1074	Chr00	26121548	26122050	u	503	0.0178555	noncoding	LncRNA
MSTRG.1075.1	MSTRG.1075	Chr00	26137213	26137625	u	413	0.0100004	noncoding	LncRNA
MSTRG.1076.1	MSTRG.1076	Chr00	26138741	26139094	u	354	0.00913859	noncoding	LncRNA
MSTRG.1077.1	MSTRG.1077	Chr00	26159408	26159871	u	464	0.00592804	noncoding	LncRNA
MSTRG.1078.1	MSTRG.1078	Chr00	26179255	26179582	u	328	0.158536	noncoding	LncRNA
MSTRG.1079.1	MSTRG.1079	Chr00	26194753	26199791	u	719	0.0309928	noncoding	LncRNA
MSTRG.1080.1	MSTRG.1080	Chr00	26311183	26311443	u	261	0.0207898	noncoding	LncRNA
MSTRG.1081.1	MSTRG.1081	Chr00	26320465	26321023	u	559	0.0129997	noncoding	LncRNA
MSTRG.1082.1	MSTRG.1082	Chr00	26342031	26342546	u	516	0.0195129	noncoding	LncRNA
MSTRG.1083.1	MSTRG.1083	Chr00	26345787	26346322	u	536	0.0103879	noncoding	LncRNA
MSTRG.1084.1	MSTRG.1084	Chr00	25895181	25898517	x	902	0.979535	coding	/
MSTRG.1084.2	MSTRG.1084	Chr00	25895192	25898517	x	842	0.873721	coding	/
MSTRG.1084.3	MSTRG.1084	Chr00	25895192	25898517	x	887	0.98837	coding	/
MSTRG.1085.1	MSTRG.1085	Chr00	25895357	25895708	u	352	0.0195828	noncoding	LncRNA
MSTRG.1086.1	MSTRG.1086	Chr00	25896559	25905421	j	2027	0.997848	coding	/
MSTRG.1086.2	MSTRG.1086	Chr00	25897312	25899010	j	1069	0.0589495	noncoding	LncRNA
AUR62044452-RA	MSTRG.1086	Chr00	25897710	25905757	=	1150	0.997063	coding	/
MSTRG.1086.4	MSTRG.1086	Chr00	25899011	25905757	j	1535	0.996778	coding	/
MSTRG.1086.5	MSTRG.1086	Chr00	25899011	25905757	j	1479	0.994567	coding	/
MSTRG.1086.6	MSTRG.1086	Chr00	25899136	25905757	j	1530	0.985209	coding	/
MSTRG.1087.1	MSTRG.1087	Chr00	25904840	25905159	x	320	0.00576899	noncoding	LncRNA
MSTRG.1088.1	MSTRG.1088	Chr00	26390132	26390483	u	352	0.0153619	noncoding	LncRNA
MSTRG.1089.1	MSTRG.1089	Chr00	26350883	26351281	u	399	0.0178834	noncoding	LncRNA
MSTRG.1090.1	MSTRG.1090	Chr00	26351393	26361914	u	2153	0.614334	coding	/
MSTRG.1090.2	MSTRG.1090	Chr00	26351511	26354595	u	571	0.00971595	noncoding	LncRNA
MSTRG.1090.3	MSTRG.1090	Chr00	26351639	26383917	u	319	0.027016	noncoding	LncRNA
MSTRG.1090.4	MSTRG.1090	Chr00	26351639	26361914	u	1853	0.718352	coding	/
MSTRG.1091.1	MSTRG.1091	Chr00	26354573	26355011	u	439	0.00679354	noncoding	LncRNA
MSTRG.1092.1	MSTRG.1092	Chr00	26355400	26356987	u	1588	0.00672928	noncoding	LncRNA
MSTRG.1093.1	MSTRG.1093	Chr00	26362166	26362476	u	311	0.0383969	noncoding	LncRNA
MSTRG.1094.1	MSTRG.1094	Chr00	26449905	26450387	u	483	0.162194	noncoding	LncRNA
MSTRG.1095.1	MSTRG.1095	Chr00	26450543	26451157	u	615	0.010359	noncoding	LncRNA
MSTRG.1096.1	MSTRG.1096	Chr00	26492874	26493082	u	209	4.99933e-07	noncoding	LncRNA
MSTRG.1097.1	MSTRG.1097	Chr00	26506434	26506763	u	330	0.0128318	noncoding	LncRNA
MSTRG.1098.1	MSTRG.1098	Chr00	26507012	26508181	u	1170	0.00939503	noncoding	LncRNA
MSTRG.1099.1	MSTRG.1099	Chr00	26518385	26518748	u	364	0.022928	noncoding	LncRNA
MSTRG.1100.1	MSTRG.1100	Chr00	26528651	26529019	u	369	0.267574	noncoding	LncRNA
MSTRG.1101.1	MSTRG.1101	Chr00	26529236	26529581	u	346	0.0134177	noncoding	LncRNA
MSTRG.1102.1	MSTRG.1102	Chr00	26534182	26534514	u	333	0.0286209	noncoding	LncRNA
MSTRG.1103.1	MSTRG.1103	Chr00	26538222	26539241	u	1020	0.00877029	noncoding	LncRNA
MSTRG.1104.1	MSTRG.1104	Chr00	26551595	26552281	u	687	0.160484	noncoding	LncRNA
MSTRG.1105.1	MSTRG.1105	Chr00	26556435	26556657	u	223	0.0181931	noncoding	LncRNA
MSTRG.1106.1	MSTRG.1106	Chr00	26600357	26600789	u	433	0.0439552	noncoding	LncRNA
MSTRG.1107.1	MSTRG.1107	Chr00	26602425	26602821	u	397	0.137086	noncoding	LncRNA
MSTRG.1108.1	MSTRG.1108	Chr00	26585904	26589112	u	700	0.303136	noncoding	LncRNA
MSTRG.1108.2	MSTRG.1108	Chr00	26585904	26589112	u	554	0.0974479	noncoding	LncRNA
MSTRG.1108.3	MSTRG.1108	Chr00	26585994	26589112	u	528	0.0477647	noncoding	LncRNA
MSTRG.1109.1	MSTRG.1109	Chr00	26612324	26612658	u	335	0.0860418	noncoding	LncRNA
MSTRG.1110.1	MSTRG.1110	Chr00	26603974	26604221	u	248	0.114371	noncoding	LncRNA
MSTRG.1111.1	MSTRG.1111	Chr00	26623188	26623465	u	278	0.0051161	noncoding	LncRNA
MSTRG.1112.1	MSTRG.1112	Chr00	26624859	26625883	u	1025	0.0334882	noncoding	LncRNA
MSTRG.1113.1	MSTRG.1113	Chr00	26635943	26636261	u	319	0.032111	noncoding	LncRNA
MSTRG.1114.1	MSTRG.1114	Chr00	26636838	26637532	u	695	0.0584716	noncoding	LncRNA
MSTRG.1115.1	MSTRG.1115	Chr00	26646680	26646976	u	297	0.00825135	noncoding	LncRNA
MSTRG.1116.1	MSTRG.1116	Chr00	26680610	26680929	u	320	0.00425026	noncoding	LncRNA
MSTRG.1117.1	MSTRG.1117	Chr00	26736896	26737184	u	289	0.0217321	noncoding	LncRNA
MSTRG.1118.1	MSTRG.1118	Chr00	26738215	26738825	u	611	0.114382	noncoding	LncRNA
MSTRG.1119.1	MSTRG.1119	Chr00	26766688	26767030	u	343	0.025416	noncoding	LncRNA
MSTRG.1120.1	MSTRG.1120	Chr00	26403892	26442364	j	7412	1	coding	/
MSTRG.1120.2	MSTRG.1120	Chr00	26404006	26436634	j	6096	1	coding	/
MSTRG.1120.3	MSTRG.1120	Chr00	26404006	26436593	j	6066	1	coding	/
AUR62043498-RA	MSTRG.1120	Chr00	26404168	26436634	=	5937	1	coding	/
MSTRG.1121.1	MSTRG.1121	Chr00	26415141	26415460	x	320	0.00304693	noncoding	LncRNA
MSTRG.1122.1	MSTRG.1122	Chr00	26423105	26423426	i	322	0.0960531	noncoding	LncRNA
MSTRG.1123.1	MSTRG.1123	Chr00	26424060	26424634	x	575	0.0136927	noncoding	LncRNA
MSTRG.1124.1	MSTRG.1124	Chr00	26436144	26438956	x	2813	0.154455	noncoding	LncRNA
MSTRG.1125.1	MSTRG.1125	Chr00	26787621	26787987	u	367	0.0188424	noncoding	LncRNA
MSTRG.1126.1	MSTRG.1126	Chr00	26778672	26778930	u	259	0.0166136	noncoding	LncRNA
MSTRG.1127.1	MSTRG.1127	Chr00	26779125	26779804	u	680	0.0244997	noncoding	LncRNA
MSTRG.1128.1	MSTRG.1128	Chr00	26792445	26792780	u	336	0.0113852	noncoding	LncRNA
MSTRG.1129.1	MSTRG.1129	Chr00	26811747	26812167	u	421	0.0103854	noncoding	LncRNA
MSTRG.1130.1	MSTRG.1130	Chr00	26791288	26791816	u	529	0.14299	noncoding	LncRNA
MSTRG.1131.1	MSTRG.1131	Chr00	26772034	26772377	u	344	0.00857511	noncoding	LncRNA
MSTRG.1132.1	MSTRG.1132	Chr00	26756195	26760014	u	862	0.0329813	noncoding	LncRNA
MSTRG.1133.1	MSTRG.1133	Chr00	26823114	26823495	u	382	1.3146e-05	noncoding	LncRNA
MSTRG.1134.1	MSTRG.1134	Chr00	26837887	26838274	u	388	0.0215255	noncoding	LncRNA
MSTRG.1135.1	MSTRG.1135	Chr00	26999160	26999408	u	249	0.0288583	noncoding	LncRNA
AUR62044014-RA	MSTRG.1136	Chr00	26951682	26962549	=	2635	1	coding	/
MSTRG.1137.1	MSTRG.1137	Chr00	26953000	26953368	i	369	0.0273526	noncoding	LncRNA
MSTRG.1138.1	MSTRG.1138	Chr00	26961609	26962548	x	940	0.0861998	noncoding	LncRNA
MSTRG.1139.1	MSTRG.1139	Chr00	26963991	26966306	o	1225	0.999976	coding	/
AUR62044015-RA	MSTRG.1139	Chr00	26964246	26966306	=	853	0.999875	coding	/
AUR62044021-RA	MSTRG.1140	Chr00	27049894	27056761	=	889	0.99691	coding	/
MSTRG.1140.2	MSTRG.1140	Chr00	27051188	27056183	j	464	0.144056	noncoding	LncRNA
MSTRG.1140.3	MSTRG.1140	Chr00	27056447	27060044	k	1150	0.998887	coding	/
AUR62044022-RA	MSTRG.1140	Chr00	27057883	27060044	=	824	0.999532	coding	/
MSTRG.1141.1	MSTRG.1141	Chr00	27060538	27064615	u	814	0.036842	noncoding	LncRNA
MSTRG.1142.1	MSTRG.1142	Chr00	27062389	27062681	u	293	0.0044546	noncoding	LncRNA
MSTRG.1143.1	MSTRG.1143	Chr00	27082373	27084737	u	474	0.0359229	noncoding	LncRNA
MSTRG.1144.1	MSTRG.1144	Chr00	27089358	27089656	u	299	0.0255078	noncoding	LncRNA
MSTRG.1145.1	MSTRG.1145	Chr00	27347069	27347299	u	231	7.24557e-06	noncoding	LncRNA
MSTRG.1146.1	MSTRG.1146	Chr00	27347624	27347858	u	235	0.0335874	noncoding	LncRNA
MSTRG.1147.1	MSTRG.1147	Chr00	27349755	27350092	u	338	0.00850205	noncoding	LncRNA
MSTRG.1148.1	MSTRG.1148	Chr00	27526397	27526701	u	305	0.165854	noncoding	LncRNA
AUR62044023-RA	MSTRG.1149	Chr00	27072554	27079695	=	1703	1	coding	/
MSTRG.1149.2	MSTRG.1149	Chr00	27072784	27074847	j	771	0.881016	coding	/
MSTRG.1149.3	MSTRG.1149	Chr00	27073033	27074560	n	587	0.645739	coding	/
MSTRG.1150.1	MSTRG.1150	Chr00	27072687	27073087	x	401	0.0147041	noncoding	LncRNA
MSTRG.1151.1	MSTRG.1151	Chr00	27655391	27663216	j	1681	1	coding	/
AUR62043579-RA	MSTRG.1151	Chr00	27655391	27658652	=	1760	1	coding	/
MSTRG.1151.3	MSTRG.1151	Chr00	27655654	27658652	j	1597	0.999999	coding	/
MSTRG.1152.1	MSTRG.1152	Chr00	27659491	27659737	u	247	0.00520048	noncoding	LncRNA
MSTRG.1153.1	MSTRG.1153	Chr00	27662784	27663123	u	340	0.00786276	noncoding	LncRNA
MSTRG.1154.1	MSTRG.1154	Chr00	27671585	27672310	x	726	0.0288761	noncoding	LncRNA
AUR62043580-RA	MSTRG.1155	Chr00	27671644	27672054	=	411	0.801354	coding	/
AUR62043581-RA	MSTRG.1156	Chr00	27672540	27680078	=	2036	1	coding	/
MSTRG.1156.2	MSTRG.1156	Chr00	27674495	27675409	j	211	0.0216614	noncoding	LncRNA
MSTRG.1157.1	MSTRG.1157	Chr00	27806311	27806630	u	320	0.020824	noncoding	LncRNA
MSTRG.1158.1	MSTRG.1158	Chr00	28032819	28033172	u	354	0.0369513	noncoding	LncRNA
MSTRG.1159.1	MSTRG.1159	Chr00	28058167	28058555	u	389	0.0470277	noncoding	LncRNA
MSTRG.1160.1	MSTRG.1160	Chr00	28059235	28059650	u	416	0.0387262	noncoding	LncRNA
MSTRG.1161.1	MSTRG.1161	Chr00	28060032	28060842	u	811	0.0840861	noncoding	LncRNA
MSTRG.1162.1	MSTRG.1162	Chr00	27685070	27688332	j	2294	0.997203	coding	/
AUR62043582-RA	MSTRG.1162	Chr00	27685189	27687093	=	1094	0.999592	coding	/
MSTRG.1163.1	MSTRG.1163	Chr00	27685197	27685618	x	422	0.00948424	noncoding	LncRNA
MSTRG.1164.1	MSTRG.1164	Chr00	27687314	27687671	u	358	0.0343399	noncoding	LncRNA
MSTRG.1165.1	MSTRG.1165	Chr00	28065636	28065960	p	325	0.00798364	noncoding	LncRNA
AUR62043172-RA	MSTRG.1166	Chr00	28062940	28064934	=	1331	1	coding	/
MSTRG.1167.1	MSTRG.1167	Chr00	28072810	28073295	u	486	0.0140049	noncoding	LncRNA
AUR62043173-RA	MSTRG.1168	Chr00	28066741	28069959	=	2091	1	coding	/
MSTRG.1169.1	MSTRG.1169	Chr00	28077524	28077890	u	367	0.0125467	noncoding	LncRNA
AUR62043174-RA	MSTRG.1170	Chr00	28078421	28080069	=	788	0.983837	coding	/
AUR62043175-RA	MSTRG.1171	Chr00	28081152	28094084	=	3295	1	coding	/
MSTRG.1171.2	MSTRG.1171	Chr00	28081193	28094084	j	3065	1	coding	/
MSTRG.1172.1	MSTRG.1172	Chr00	28387364	28387621	u	258	0.00370458	noncoding	LncRNA
MSTRG.1173.1	MSTRG.1173	Chr00	28155911	28156198	u	288	0.00303796	noncoding	LncRNA
MSTRG.1174.1	MSTRG.1174	Chr00	28163768	28164240	u	473	0.0604962	noncoding	LncRNA
MSTRG.1175.1	MSTRG.1175	Chr00	28531827	28532028	u	202	1.28922e-05	noncoding	LncRNA
MSTRG.1176.1	MSTRG.1176	Chr00	28538767	28539412	u	646	0.00872863	noncoding	LncRNA
MSTRG.1177.1	MSTRG.1177	Chr00	28582684	28583051	u	368	0.0151834	noncoding	LncRNA
MSTRG.1178.1	MSTRG.1178	Chr00	28652256	28652629	u	374	0.0143808	noncoding	LncRNA
MSTRG.1179.1	MSTRG.1179	Chr00	28642694	28643202	u	509	0.0298974	noncoding	LncRNA
MSTRG.1180.1	MSTRG.1180	Chr00	28653962	28654380	u	419	0.00830213	noncoding	LncRNA
MSTRG.1181.1	MSTRG.1181	Chr00	28674048	28674417	u	370	0.0139023	noncoding	LncRNA
MSTRG.1182.1	MSTRG.1182	Chr00	28682644	28682931	u	288	0.0113883	noncoding	LncRNA
MSTRG.1183.1	MSTRG.1183	Chr00	28094593	28108956	x	397	0.00376333	noncoding	LncRNA
AUR62043176-RA	MSTRG.1184	Chr00	28100617	28101407	=	672	0.999432	coding	/
MSTRG.1185.1	MSTRG.1185	Chr00	28108295	28137063	k	3962	1	coding	/
MSTRG.1185.2	MSTRG.1185	Chr00	28108551	28137063	j	3562	1	coding	/
AUR62043177-RA	MSTRG.1185	Chr00	28108553	28136490	=	3486	1	coding	/
AUR62044513-RA	MSTRG.1186	Chr00	28812597	28817728	=	660	0.955764	coding	/
MSTRG.1187.1	MSTRG.1187	Chr00	28813848	28814074	i	227	0.0269974	noncoding	LncRNA
MSTRG.1188.1	MSTRG.1188	Chr00	28818081	28818440	u	360	0.0198525	noncoding	LncRNA
MSTRG.1189.1	MSTRG.1189	Chr00	28895501	28895955	u	455	0.296317	noncoding	LncRNA
MSTRG.1190.1	MSTRG.1190	Chr00	28833938	28834218	u	281	0.164243	noncoding	LncRNA
MSTRG.1191.1	MSTRG.1191	Chr00	28897598	28898131	u	534	0.0082766	noncoding	LncRNA
MSTRG.1192.1	MSTRG.1192	Chr00	29029791	29030055	u	265	0.0492906	noncoding	LncRNA
MSTRG.1193.1	MSTRG.1193	Chr00	29154375	29154747	u	373	0.17852	noncoding	LncRNA
MSTRG.1194.1	MSTRG.1194	Chr00	29163123	29163362	u	240	0.0123937	noncoding	LncRNA
MSTRG.1195.1	MSTRG.1195	Chr00	29270309	29270548	u	240	0.0181706	noncoding	LncRNA
MSTRG.1196.1	MSTRG.1196	Chr00	29428312	29428648	u	337	0.0118989	noncoding	LncRNA
MSTRG.1197.1	MSTRG.1197	Chr00	29442294	29442635	u	342	0.00549959	noncoding	LncRNA
MSTRG.1198.1	MSTRG.1198	Chr00	29400985	29413219	u	892	0.0389482	noncoding	LncRNA
MSTRG.1199.1	MSTRG.1199	Chr00	29401205	29407092	u	217	0.00321761	noncoding	LncRNA
MSTRG.1200.1	MSTRG.1200	Chr00	29406123	29412956	u	1161	0.0284492	noncoding	LncRNA
MSTRG.1201.1	MSTRG.1201	Chr00	29443706	29444009	u	304	0.0092936	noncoding	LncRNA
MSTRG.1202.1	MSTRG.1202	Chr00	29468514	29468863	u	350	0.0821049	noncoding	LncRNA
MSTRG.1203.1	MSTRG.1203	Chr00	29479826	29486703	u	553	0.0271066	noncoding	LncRNA
MSTRG.1204.1	MSTRG.1204	Chr00	29489578	29490083	u	506	0.0792735	noncoding	LncRNA
MSTRG.1205.1	MSTRG.1205	Chr00	29508511	29509385	u	875	0.00834313	noncoding	LncRNA
MSTRG.1206.1	MSTRG.1206	Chr00	29510094	29510346	u	253	0.00355511	noncoding	LncRNA
MSTRG.1207.1	MSTRG.1207	Chr00	29516647	29516897	u	251	0.00355707	noncoding	LncRNA
MSTRG.1208.1	MSTRG.1208	Chr00	29519889	29520189	u	301	0.0536487	noncoding	LncRNA
MSTRG.1209.1	MSTRG.1209	Chr00	29525528	29525885	u	358	0.0927328	noncoding	LncRNA
MSTRG.1210.1	MSTRG.1210	Chr00	29525914	29526320	u	407	0.0061626	noncoding	LncRNA
MSTRG.1211.1	MSTRG.1211	Chr00	29543307	29543680	u	374	0.0962915	noncoding	LncRNA
MSTRG.1212.1	MSTRG.1212	Chr00	29568026	29568389	u	364	0.0143963	noncoding	LncRNA
MSTRG.1213.1	MSTRG.1213	Chr00	29577191	29577531	u	341	0.0210166	noncoding	LncRNA
MSTRG.1214.1	MSTRG.1214	Chr00	29644958	29645292	u	335	0.0564842	noncoding	LncRNA
MSTRG.1215.1	MSTRG.1215	Chr00	29674689	29674921	u	233	0.026376	noncoding	LncRNA
MSTRG.1216.1	MSTRG.1216	Chr00	29675489	29676942	u	1454	0.0362917	noncoding	LncRNA
MSTRG.1217.1	MSTRG.1217	Chr00	29679175	29679490	u	316	0.0214342	noncoding	LncRNA
MSTRG.1218.1	MSTRG.1218	Chr00	29682088	29682702	u	615	0.0147747	noncoding	LncRNA
MSTRG.1219.1	MSTRG.1219	Chr00	29683636	29684343	u	708	0.0094953	noncoding	LncRNA
MSTRG.1220.1	MSTRG.1220	Chr00	29687686	29688070	u	385	0.00351982	noncoding	LncRNA
MSTRG.1221.1	MSTRG.1221	Chr00	29690972	29691512	u	541	0.0137076	noncoding	LncRNA
MSTRG.1222.1	MSTRG.1222	Chr00	29743587	29743806	u	220	0.0149815	noncoding	LncRNA
MSTRG.1223.1	MSTRG.1223	Chr00	29772014	29772305	u	292	0.0233467	noncoding	LncRNA
MSTRG.1224.1	MSTRG.1224	Chr00	29808113	29808663	u	551	0.0177266	noncoding	LncRNA
MSTRG.1225.1	MSTRG.1225	Chr00	29815076	29815744	u	669	0.150049	noncoding	LncRNA
MSTRG.1226.1	MSTRG.1226	Chr00	29764657	29766683	u	1177	0.0180616	noncoding	LncRNA
MSTRG.1226.2	MSTRG.1226	Chr00	29764659	29770272	u	752	0.0147355	noncoding	LncRNA
MSTRG.1226.3	MSTRG.1226	Chr00	29764661	29766683	u	1197	0.0181184	noncoding	LncRNA
MSTRG.1227.1	MSTRG.1227	Chr00	29764659	29765241	u	583	0.0147665	noncoding	LncRNA
MSTRG.1228.1	MSTRG.1228	Chr00	29818280	29818749	u	470	0.0129605	noncoding	LncRNA
MSTRG.1229.1	MSTRG.1229	Chr00	29822530	29823192	u	663	0.0155395	noncoding	LncRNA
MSTRG.1230.1	MSTRG.1230	Chr00	29824106	29824758	u	653	0.0104708	noncoding	LncRNA
MSTRG.1231.1	MSTRG.1231	Chr00	29828726	29829638	u	913	0.00345916	noncoding	LncRNA
AUR62043875-RA	MSTRG.1232	Chr00	29819571	29821430	=	871	0.0590758	noncoding	LncRNA
MSTRG.1232.2	MSTRG.1232	Chr00	29819642	29821430	j	864	0.022701	noncoding	LncRNA
MSTRG.1232.3	MSTRG.1232	Chr00	29819642	29821430	j	855	0.022701	noncoding	LncRNA
MSTRG.1232.4	MSTRG.1232	Chr00	29819906	29821430	j	569	0.29351	noncoding	LncRNA
MSTRG.1232.5	MSTRG.1232	Chr00	29819912	29821430	j	554	0.251249	noncoding	LncRNA
MSTRG.1233.1	MSTRG.1233	Chr00	29838709	29838978	u	270	0.00764055	noncoding	LncRNA
MSTRG.1234.1	MSTRG.1234	Chr00	29840131	29840382	u	252	0.0105275	noncoding	LncRNA
MSTRG.1235.1	MSTRG.1235	Chr00	29835333	29838141	u	689	0.0153922	noncoding	LncRNA
MSTRG.1236.1	MSTRG.1236	Chr00	29847965	29848172	u	208	0.0195046	noncoding	LncRNA
MSTRG.1237.1	MSTRG.1237	Chr00	29859655	29860420	u	766	0.0143294	noncoding	LncRNA
MSTRG.1238.1	MSTRG.1238	Chr00	29861085	29861764	u	680	0.00888327	noncoding	LncRNA
MSTRG.1239.1	MSTRG.1239	Chr00	29866316	29866894	u	579	0.0471687	noncoding	LncRNA
MSTRG.1240.1	MSTRG.1240	Chr00	29867503	29867785	u	283	0.00996407	noncoding	LncRNA
MSTRG.1241.1	MSTRG.1241	Chr00	29886190	29886558	u	369	0.0650744	noncoding	LncRNA
MSTRG.1242.1	MSTRG.1242	Chr00	29895588	29895793	u	206	0.0165611	noncoding	LncRNA
MSTRG.1243.1	MSTRG.1243	Chr00	29901735	29902030	u	296	0.212694	noncoding	LncRNA
MSTRG.1244.1	MSTRG.1244	Chr00	29916746	29917294	u	549	0.0249625	noncoding	LncRNA
MSTRG.1245.1	MSTRG.1245	Chr00	29925048	29925418	u	371	1.23973e-05	noncoding	LncRNA
AUR62044116-RA	MSTRG.1246	Chr00	30008298	30009722	=	669	0.974005	coding	/
MSTRG.1247.1	MSTRG.1247	Chr00	30008320	30008558	x	239	0.0604506	noncoding	LncRNA
MSTRG.1248.1	MSTRG.1248	Chr00	30009325	30009675	x	351	0.0381091	noncoding	LncRNA
MSTRG.1249.1	MSTRG.1249	Chr00	30093813	30094176	u	364	0.01105	noncoding	LncRNA
MSTRG.1250.1	MSTRG.1250	Chr00	30189684	30189943	u	260	0.0270788	noncoding	LncRNA
MSTRG.1251.1	MSTRG.1251	Chr00	29929222	29941681	j	2064	0.999999	coding	/
MSTRG.1251.2	MSTRG.1251	Chr00	29929222	29941681	j	1448	1	coding	/
MSTRG.1251.3	MSTRG.1251	Chr00	29929853	29941681	j	1513	0.999261	coding	/
AUR62043876-RA	MSTRG.1251	Chr00	29929938	29940846	=	1156	1	coding	/
AUR62043877-RA	MSTRG.1252	Chr00	29941440	29954500	=	940	0.999987	coding	/
MSTRG.1253.1	MSTRG.1253	Chr00	29947951	29948290	i	340	0.184338	noncoding	LncRNA
MSTRG.1254.1	MSTRG.1254	Chr00	29948498	29948725	i	228	0.00592856	noncoding	LncRNA
AUR62044118-RA	MSTRG.1255	Chr00	30024794	30029364	=	690	0.999841	coding	/
MSTRG.1256.1	MSTRG.1256	Chr00	30216177	30216859	x	683	0.0141459	noncoding	LncRNA
AUR62044174-RA	MSTRG.1257	Chr00	30216728	30217353	=	378	0.856477	coding	/
MSTRG.1258.1	MSTRG.1258	Chr00	30229987	30231216	x	1230	0.998505	coding	/
AUR62044176-RA	MSTRG.1259	Chr00	30230104	30231216	=	1113	1	coding	/
MSTRG.1260.1	MSTRG.1260	Chr00	30237441	30237649	u	209	1.41548e-06	noncoding	LncRNA
MSTRG.1261.1	MSTRG.1261	Chr00	30250099	30250536	u	438	0.0990709	noncoding	LncRNA
MSTRG.1262.1	MSTRG.1262	Chr00	30219492	30220211	u	720	0.883956	coding	/
AUR62044175-RA	MSTRG.1263	Chr00	30221626	30226250	=	2115	1	coding	/
MSTRG.1263.2	MSTRG.1263	Chr00	30224609	30226250	m	1494	0.892819	coding	/
MSTRG.1264.1	MSTRG.1264	Chr00	30223177	30223789	i	613	0.111341	noncoding	LncRNA
MSTRG.1265.1	MSTRG.1265	Chr00	30270926	30271315	u	390	0.110332	noncoding	LncRNA
MSTRG.1266.1	MSTRG.1266	Chr00	30329428	30329862	u	435	0.874666	coding	/
MSTRG.1267.1	MSTRG.1267	Chr00	30350276	30350733	u	458	0.0113598	noncoding	LncRNA
MSTRG.1268.1	MSTRG.1268	Chr00	30350937	30351218	u	282	0.00803057	noncoding	LncRNA
MSTRG.1269.1	MSTRG.1269	Chr00	30376229	30377345	u	1117	0.00947553	noncoding	LncRNA
MSTRG.1270.1	MSTRG.1270	Chr00	30378654	30379034	u	381	0.0909345	noncoding	LncRNA
MSTRG.1271.1	MSTRG.1271	Chr00	30395765	30396011	u	247	0.0105467	noncoding	LncRNA
MSTRG.1272.1	MSTRG.1272	Chr00	30396642	30397360	u	719	0.0455496	noncoding	LncRNA
MSTRG.1273.1	MSTRG.1273	Chr00	30410979	30411277	u	299	0.0120502	noncoding	LncRNA
MSTRG.1274.1	MSTRG.1274	Chr00	30413145	30413581	u	437	0.00441569	noncoding	LncRNA
MSTRG.1275.1	MSTRG.1275	Chr00	30416151	30416857	u	707	0.00798546	noncoding	LncRNA
MSTRG.1276.1	MSTRG.1276	Chr00	30417166	30417590	u	425	0.00445032	noncoding	LncRNA
MSTRG.1277.1	MSTRG.1277	Chr00	30423752	30424107	u	356	0.00475801	noncoding	LncRNA
MSTRG.1278.1	MSTRG.1278	Chr00	30426954	30427279	u	326	0.0301092	noncoding	LncRNA
MSTRG.1279.1	MSTRG.1279	Chr00	30436131	30436447	u	317	0.0148291	noncoding	LncRNA
MSTRG.1280.1	MSTRG.1280	Chr00	30538281	30539231	u	951	0.00820029	noncoding	LncRNA
MSTRG.1281.1	MSTRG.1281	Chr00	30542953	30543321	u	369	0.0116805	noncoding	LncRNA
MSTRG.1282.1	MSTRG.1282	Chr00	30544812	30545338	u	527	0.0569868	noncoding	LncRNA
MSTRG.1283.1	MSTRG.1283	Chr00	30629163	30629523	u	361	0.00949245	noncoding	LncRNA
MSTRG.1284.1	MSTRG.1284	Chr00	30631075	30631498	u	424	0.01976	noncoding	LncRNA
MSTRG.1285.1	MSTRG.1285	Chr00	30632875	30633178	u	304	0.0617772	noncoding	LncRNA
MSTRG.1286.1	MSTRG.1286	Chr00	30780999	30781358	u	360	0.180468	noncoding	LncRNA
MSTRG.1287.1	MSTRG.1287	Chr00	30884558	30887646	u	560	0.0222741	noncoding	LncRNA
MSTRG.1288.1	MSTRG.1288	Chr00	30885135	30885435	u	301	0.00427112	noncoding	LncRNA
MSTRG.1289.1	MSTRG.1289	Chr00	30951274	30951583	u	310	0.0226944	noncoding	LncRNA
MSTRG.1290.1	MSTRG.1290	Chr00	30901115	30902036	u	922	0.0267551	noncoding	LncRNA
MSTRG.1291.1	MSTRG.1291	Chr00	30955645	30955906	u	262	0.00437181	noncoding	LncRNA
MSTRG.1292.1	MSTRG.1292	Chr00	30957310	30957682	u	373	0.130693	noncoding	LncRNA
MSTRG.1293.1	MSTRG.1293	Chr00	30962582	30962829	u	248	0.00810824	noncoding	LncRNA
MSTRG.1294.1	MSTRG.1294	Chr00	30969985	30970551	u	567	0.016106	noncoding	LncRNA
MSTRG.1295.1	MSTRG.1295	Chr00	30975629	30976198	u	570	0.017168	noncoding	LncRNA
MSTRG.1296.1	MSTRG.1296	Chr00	30993563	30994437	u	268	0.00264516	noncoding	LncRNA
MSTRG.1297.1	MSTRG.1297	Chr00	30995039	30995479	u	441	0.0114367	noncoding	LncRNA
AUR62044614-RA	MSTRG.1298	Chr00	30977902	30981667	=	996	0.999999	coding	/
MSTRG.1298.2	MSTRG.1298	Chr00	30980177	30981667	j	658	0.0176792	noncoding	LncRNA
MSTRG.1299.1	MSTRG.1299	Chr00	30981357	30981668	x	312	0.00549072	noncoding	LncRNA
MSTRG.1300.1	MSTRG.1300	Chr00	31007645	31008370	u	726	0.0281993	noncoding	LncRNA
MSTRG.1301.1	MSTRG.1301	Chr00	30995696	30996743	u	1048	0.597257	coding	/
MSTRG.1302.1	MSTRG.1302	Chr00	31011444	31011767	u	324	0.0125223	noncoding	LncRNA
MSTRG.1303.1	MSTRG.1303	Chr00	31205047	31205588	u	542	0.174433	noncoding	LncRNA
MSTRG.1304.1	MSTRG.1304	Chr00	31187378	31188627	u	988	0.107722	noncoding	LncRNA
MSTRG.1305.1	MSTRG.1305	Chr00	31187378	31188627	p	1250	0.014286	noncoding	LncRNA
MSTRG.1306.1	MSTRG.1306	Chr00	31207878	31208419	u	542	0.164051	noncoding	LncRNA
MSTRG.1307.1	MSTRG.1307	Chr00	31177987	31178557	x	571	0.159264	noncoding	LncRNA
AUR62044218-RA	MSTRG.1308	Chr00	31178088	31185484	=	1704	1	coding	/
MSTRG.1308.2	MSTRG.1308	Chr00	31184395	31186096	j	657	0.0693722	noncoding	LncRNA
MSTRG.1308.3	MSTRG.1308	Chr00	31184472	31184961	j	317	0.493038	noncoding	LncRNA
MSTRG.1309.1	MSTRG.1309	Chr00	31180458	31181137	i	680	0.0357099	noncoding	LncRNA
MSTRG.1310.1	MSTRG.1310	Chr00	31295546	31299583	u	1114	0.0345386	noncoding	LncRNA
MSTRG.1310.2	MSTRG.1310	Chr00	31295708	31299583	u	942	0.0554807	noncoding	LncRNA
MSTRG.1311.1	MSTRG.1311	Chr00	31281661	31288524	k	1000	0.779759	coding	/
AUR62044490-RA	MSTRG.1311	Chr00	31281661	31287399	=	922	0.794328	coding	/
MSTRG.1311.3	MSTRG.1311	Chr00	31284497	31288524	j	1538	0.992791	coding	/
MSTRG.1311.4	MSTRG.1311	Chr00	31284498	31288524	j	1651	0.989769	coding	/
MSTRG.1311.5	MSTRG.1311	Chr00	31284788	31288524	j	1202	0.994483	coding	/
MSTRG.1311.6	MSTRG.1311	Chr00	31284788	31287741	j	1309	0.993022	coding	/
MSTRG.1311.7	MSTRG.1311	Chr00	31284788	31287741	j	1189	0.995824	coding	/
MSTRG.1312.1	MSTRG.1312	Chr00	31286915	31287503	x	589	0.116671	noncoding	LncRNA
AUR62043932-RA	MSTRG.1313	Chr00	31311728	31315733	=	1523	1	coding	/
MSTRG.1314.1	MSTRG.1314	Chr00	31334132	31335064	u	933	0.0224828	noncoding	LncRNA
AUR62043933-RA	MSTRG.1315	Chr00	31326353	31331232	=	2185	1	coding	/
MSTRG.1315.2	MSTRG.1315	Chr00	31326501	31328187	n	1241	0.988126	coding	/
AUR62044294-RA	MSTRG.1316	Chr00	31447725	31452040	=	1794	1	coding	/
MSTRG.1316.2	MSTRG.1316	Chr00	31447843	31453087	j	2225	1	coding	/
MSTRG.1317.1	MSTRG.1317	Chr00	31481233	31481836	u	604	0.025324	noncoding	LncRNA
MSTRG.1318.1	MSTRG.1318	Chr00	31583529	31583869	u	341	0.00723489	noncoding	LncRNA
MSTRG.1319.1	MSTRG.1319	Chr00	31608996	31609278	u	283	0.0888889	noncoding	LncRNA
MSTRG.1320.1	MSTRG.1320	Chr00	31651030	31651461	u	432	0.00276558	noncoding	LncRNA
MSTRG.1321.1	MSTRG.1321	Chr00	31453773	31456575	j	971	0.185946	noncoding	LncRNA
MSTRG.1321.2	MSTRG.1321	Chr00	31453828	31456575	j	1675	0.979308	coding	/
MSTRG.1321.3	MSTRG.1321	Chr00	31453828	31456575	j	927	0.134202	noncoding	LncRNA
MSTRG.1321.4	MSTRG.1321	Chr00	31453830	31456575	j	1684	0.787983	coding	/
MSTRG.1321.5	MSTRG.1321	Chr00	31453846	31456575	j	1080	0.534193	coding	/
MSTRG.1321.6	MSTRG.1321	Chr00	31453860	31456575	j	1055	0.939403	coding	/
AUR62044295-RA	MSTRG.1321	Chr00	31455179	31458340	=	900	0.999993	coding	/
MSTRG.1322.1	MSTRG.1322	Chr00	31453887	31455002	u	1116	0.0202394	noncoding	LncRNA
MSTRG.1323.1	MSTRG.1323	Chr00	31455994	31456553	i	560	0.0417995	noncoding	LncRNA
AUR62044509-RA	MSTRG.1324	Chr00	31613202	31618879	=	1444	1	coding	/
MSTRG.1325.1	MSTRG.1325	Chr00	31744157	31744357	u	201	0.00542046	noncoding	LncRNA
MSTRG.1326.1	MSTRG.1326	Chr00	31879977	31880216	u	240	0.00485651	noncoding	LncRNA
MSTRG.1327.1	MSTRG.1327	Chr00	31908361	31908591	u	231	1.8328e-05	noncoding	LncRNA
MSTRG.1328.1	MSTRG.1328	Chr00	31927617	31927923	u	307	0.0280232	noncoding	LncRNA
MSTRG.1329.1	MSTRG.1329	Chr00	31941421	31941727	u	307	0.0280232	noncoding	LncRNA
MSTRG.1330.1	MSTRG.1330	Chr00	31944456	31944762	u	307	0.0280232	noncoding	LncRNA
MSTRG.1331.1	MSTRG.1331	Chr00	31947492	31947798	u	307	0.0280232	noncoding	LncRNA
MSTRG.1332.1	MSTRG.1332	Chr00	31966247	31966575	u	329	0.00934499	noncoding	LncRNA
MSTRG.1333.1	MSTRG.1333	Chr00	32205219	32205567	u	349	0.0524416	noncoding	LncRNA
MSTRG.1334.1	MSTRG.1334	Chr00	32251608	32252553	u	946	0.0209668	noncoding	LncRNA
MSTRG.1335.1	MSTRG.1335	Chr00	32264914	32265169	u	256	0.117473	noncoding	LncRNA
MSTRG.1336.1	MSTRG.1336	Chr00	32346387	32346889	u	503	0.0618741	noncoding	LncRNA
MSTRG.1337.1	MSTRG.1337	Chr00	32368235	32368603	u	369	0.0314711	noncoding	LncRNA
MSTRG.1338.1	MSTRG.1338	Chr00	32395295	32395695	u	401	0.037042	noncoding	LncRNA
MSTRG.1339.1	MSTRG.1339	Chr00	32397833	32398119	u	287	0.00584717	noncoding	LncRNA
MSTRG.1340.1	MSTRG.1340	Chr00	32410673	32411150	u	478	0.010669	noncoding	LncRNA
MSTRG.1341.1	MSTRG.1341	Chr00	32482554	32482901	u	348	0.170139	noncoding	LncRNA
MSTRG.1342.1	MSTRG.1342	Chr00	32605509	32605882	u	374	0.038666	noncoding	LncRNA
AUR62043883-RA	MSTRG.1343	Chr00	32665485	32667049	=	777	0.999983	coding	/
MSTRG.1344.1	MSTRG.1344	Chr00	32580159	32592683	u	3507	0.0616987	noncoding	LncRNA
MSTRG.1344.2	MSTRG.1344	Chr00	32580162	32592683	u	3764	0.0598289	noncoding	LncRNA
MSTRG.1345.1	MSTRG.1345	Chr00	32580214	32592687	u	3456	0.489475	noncoding	LncRNA
MSTRG.1346.1	MSTRG.1346	Chr00	32586442	32588065	u	1624	0.14935	noncoding	LncRNA
MSTRG.1347.1	MSTRG.1347	Chr00	32715542	32715792	u	251	0.100032	noncoding	LncRNA
MSTRG.1348.1	MSTRG.1348	Chr00	32752501	32753233	u	733	0.581691	coding	/
MSTRG.1349.1	MSTRG.1349	Chr00	32794539	32794814	u	276	0.00908099	noncoding	LncRNA
AUR62043884-RA	MSTRG.1350	Chr00	32668769	32680827	=	3716	1	coding	/
MSTRG.1350.2	MSTRG.1350	Chr00	32670392	32676523	n	2316	0.999986	coding	/
MSTRG.1350.3	MSTRG.1350	Chr00	32670606	32676523	n	2393	0.999979	coding	/
MSTRG.1351.1	MSTRG.1351	Chr00	32669284	32669542	i	259	0.14043	noncoding	LncRNA
MSTRG.1352.1	MSTRG.1352	Chr00	32672667	32673111	i	445	0.0147684	noncoding	LncRNA
MSTRG.1353.1	MSTRG.1353	Chr00	32830941	32831484	u	544	0.0295881	noncoding	LncRNA
MSTRG.1354.1	MSTRG.1354	Chr00	32838711	32839010	u	300	0.032095	noncoding	LncRNA
MSTRG.1355.1	MSTRG.1355	Chr00	33131354	33131853	u	500	0.0200032	noncoding	LncRNA
MSTRG.1356.1	MSTRG.1356	Chr00	33186943	33187372	u	430	0.041794	noncoding	LncRNA
MSTRG.1357.1	MSTRG.1357	Chr00	32816614	32816950	x	337	1.09874e-05	noncoding	LncRNA
MSTRG.1358.1	MSTRG.1358	Chr00	32816625	32827149	o	1610	1	coding	/
AUR62044555-RA	MSTRG.1358	Chr00	32816833	32826417	=	1663	1	coding	/
MSTRG.1358.3	MSTRG.1358	Chr00	32819559	32824407	i	237	0.00262029	noncoding	LncRNA
MSTRG.1358.4	MSTRG.1358	Chr00	32821224	32827149	o	1681	1	coding	/
MSTRG.1359.1	MSTRG.1359	Chr00	32825320	32826800	x	1481	0.639491	coding	/
MSTRG.1360.1	MSTRG.1360	Chr00	32842739	32846229	o	805	0.990559	coding	/
MSTRG.1360.2	MSTRG.1360	Chr00	32842739	32846229	o	970	0.991132	coding	/
AUR62044688-RA	MSTRG.1360	Chr00	32843672	32843875	=	204	0.167036	noncoding	LncRNA
AUR62044689-RA	MSTRG.1360	Chr00	32845025	32845381	=	357	0.844624	coding	/
MSTRG.1361.1	MSTRG.1361	Chr00	32843298	32843684	x	387	0.0066036	noncoding	LncRNA
MSTRG.1362.1	MSTRG.1362	Chr00	33428552	33429108	u	557	0.0123999	noncoding	LncRNA
MSTRG.1363.1	MSTRG.1363	Chr00	33434566	33435261	u	696	0.0613514	noncoding	LncRNA
MSTRG.1364.1	MSTRG.1364	Chr00	33438605	33438993	u	389	0.0496418	noncoding	LncRNA
MSTRG.1365.1	MSTRG.1365	Chr00	33441303	33441939	u	637	0.00957841	noncoding	LncRNA
MSTRG.1366.1	MSTRG.1366	Chr00	33453017	33453362	u	346	0.00849843	noncoding	LncRNA
MSTRG.1367.1	MSTRG.1367	Chr00	33906021	33907888	u	1868	0.0414661	noncoding	LncRNA
MSTRG.1368.1	MSTRG.1368	Chr00	33907966	33908367	u	402	0.0130026	noncoding	LncRNA
MSTRG.1369.1	MSTRG.1369	Chr00	33914626	33915178	u	553	0.0147819	noncoding	LncRNA
MSTRG.1370.1	MSTRG.1370	Chr00	33916303	33917348	u	1046	0.00396418	noncoding	LncRNA
MSTRG.1371.1	MSTRG.1371	Chr00	33923010	33923606	u	597	0.0659998	noncoding	LncRNA
MSTRG.1372.1	MSTRG.1372	Chr00	33959662	33959912	u	251	0.0290124	noncoding	LncRNA
MSTRG.1373.1	MSTRG.1373	Chr00	33961690	33961921	u	232	0.00863755	noncoding	LncRNA
MSTRG.1374.1	MSTRG.1374	Chr00	33964334	33964875	u	542	0.061382	noncoding	LncRNA
MSTRG.1375.1	MSTRG.1375	Chr00	33965273	33966202	u	930	0.0136986	noncoding	LncRNA
MSTRG.1376.1	MSTRG.1376	Chr00	33968324	33969021	u	698	0.0447736	noncoding	LncRNA
MSTRG.1377.1	MSTRG.1377	Chr00	33969791	33970055	u	265	0.0497472	noncoding	LncRNA
MSTRG.1378.1	MSTRG.1378	Chr00	33973855	33974074	u	220	1.47905e-05	noncoding	LncRNA
MSTRG.1379.1	MSTRG.1379	Chr00	33982907	33983210	u	304	0.0711315	noncoding	LncRNA
MSTRG.1380.1	MSTRG.1380	Chr00	33985508	33985827	u	320	0.0817097	noncoding	LncRNA
MSTRG.1381.1	MSTRG.1381	Chr00	33996524	33996891	u	368	0.0178691	noncoding	LncRNA
MSTRG.1382.1	MSTRG.1382	Chr00	33998789	33999240	u	452	0.0131358	noncoding	LncRNA
MSTRG.1383.1	MSTRG.1383	Chr00	33999480	33999876	u	397	0.0141971	noncoding	LncRNA
MSTRG.1384.1	MSTRG.1384	Chr00	34005977	34006717	u	741	0.0341891	noncoding	LncRNA
MSTRG.1385.1	MSTRG.1385	Chr00	34023945	34024529	u	585	0.0127681	noncoding	LncRNA
MSTRG.1386.1	MSTRG.1386	Chr00	34029966	34030314	u	349	0.0164663	noncoding	LncRNA
MSTRG.1387.1	MSTRG.1387	Chr00	34032230	34032878	u	649	0.0378134	noncoding	LncRNA
MSTRG.1388.1	MSTRG.1388	Chr00	34012949	34017460	o	1470	0.999993	coding	/
MSTRG.1388.2	MSTRG.1388	Chr00	34012957	34017460	o	1528	0.999996	coding	/
AUR62021048-RA	MSTRG.1388	Chr00	34016392	34017460	k	1069	0.999429	coding	/
MSTRG.1389.1	MSTRG.1389	Chr00	34013782	34014243	u	462	0.0824621	noncoding	LncRNA
MSTRG.1390.1	MSTRG.1390	Chr00	34034202	34034538	u	337	0.00371842	noncoding	LncRNA
MSTRG.1391.1	MSTRG.1391	Chr00	34034946	34035256	u	311	0.0035516	noncoding	LncRNA
MSTRG.1392.1	MSTRG.1392	Chr00	34040462	34040723	p	262	0.00266194	noncoding	LncRNA
MSTRG.1393.1	MSTRG.1393	Chr00	34041596	34043320	x	1725	0.0662303	noncoding	LncRNA
AUR62021049-RA	MSTRG.1394	Chr00	34041852	34043063	=	1212	1	coding	/
MSTRG.1395.1	MSTRG.1395	Chr00	34045388	34045689	u	302	0.00749587	noncoding	LncRNA
MSTRG.1396.1	MSTRG.1396	Chr00	34048429	34048901	u	473	0.00716283	noncoding	LncRNA
MSTRG.1397.1	MSTRG.1397	Chr00	34052154	34052476	u	323	0.0181134	noncoding	LncRNA
MSTRG.1398.1	MSTRG.1398	Chr00	34077531	34078116	u	586	0.0687457	noncoding	LncRNA
AUR62021050-RA	MSTRG.1399	Chr00	34085389	34089208	=	1188	0.843218	coding	/
MSTRG.1399.2	MSTRG.1399	Chr00	34085402	34087179	j	871	0.64191	coding	/
MSTRG.1399.3	MSTRG.1399	Chr00	34085402	34089208	j	1047	0.00941135	noncoding	LncRNA
MSTRG.1400.1	MSTRG.1400	Chr00	34095941	34096201	p	261	0.0101411	noncoding	LncRNA
AUR62021051-RA	MSTRG.1401	Chr00	34090663	34095518	=	1251	0.999411	coding	/
MSTRG.1402.1	MSTRG.1402	Chr00	34103132	34103487	u	356	0.0047045	noncoding	LncRNA
MSTRG.1403.1	MSTRG.1403	Chr00	34096452	34098879	x	2428	0.0860298	noncoding	LncRNA
AUR62021052-RA	MSTRG.1404	Chr00	34096718	34099948	=	2588	1	coding	/
MSTRG.1405.1	MSTRG.1405	Chr00	34123706	34124077	u	372	0.0193492	noncoding	LncRNA
MSTRG.1406.1	MSTRG.1406	Chr00	34105062	34108836	j	2490	1	coding	/
AUR62021053-RA	MSTRG.1406	Chr00	34105280	34108836	=	2965	1	coding	/
MSTRG.1407.1	MSTRG.1407	Chr00	34107121	34107897	x	777	0.700564	coding	/
MSTRG.1408.1	MSTRG.1408	Chr00	34108930	34110379	u	1101	0.0415668	noncoding	LncRNA
MSTRG.1408.2	MSTRG.1408	Chr00	34108930	34110379	u	1096	0.0521798	noncoding	LncRNA
MSTRG.1409.1	MSTRG.1409	Chr00	34135357	34136023	u	667	0.00448719	noncoding	LncRNA
MSTRG.1410.1	MSTRG.1410	Chr00	34127388	34134353	j	1910	1	coding	/
MSTRG.1410.2	MSTRG.1410	Chr00	34127388	34134353	j	1901	1	coding	/
AUR62021054-RA	MSTRG.1410	Chr00	34127449	34133460	=	1795	1	coding	/
MSTRG.1410.4	MSTRG.1410	Chr00	34127513	34134353	j	1850	1	coding	/
MSTRG.1410.5	MSTRG.1410	Chr00	34127515	34134353	j	1857	1	coding	/
MSTRG.1411.1	MSTRG.1411	Chr00	34127516	34127737	x	222	0.0157989	noncoding	LncRNA
MSTRG.1412.1	MSTRG.1412	Chr00	34132905	34133220	x	316	0.00658362	noncoding	LncRNA
MSTRG.1413.1	MSTRG.1413	Chr00	34160696	34161063	u	368	0.00935323	noncoding	LncRNA
MSTRG.1414.1	MSTRG.1414	Chr00	34168148	34168838	u	691	0.253087	noncoding	LncRNA
MSTRG.1415.1	MSTRG.1415	Chr00	34169125	34169614	u	490	0.11919	noncoding	LncRNA
MSTRG.1416.1	MSTRG.1416	Chr00	34171981	34172350	u	370	0.0269486	noncoding	LncRNA
MSTRG.1417.1	MSTRG.1417	Chr00	34138081	34144069	m	1835	0.999499	coding	/
MSTRG.1417.2	MSTRG.1417	Chr00	34138081	34144069	j	1710	0.999052	coding	/
MSTRG.1417.3	MSTRG.1417	Chr00	34138094	34142278	j	1359	0.823641	coding	/
AUR62021055-RA	MSTRG.1417	Chr00	34138737	34144069	=	1158	0.999723	coding	/
MSTRG.1418.1	MSTRG.1418	Chr00	34144220	34159351	j	1676	1	coding	/
MSTRG.1418.2	MSTRG.1418	Chr00	34144229	34159351	j	1649	1	coding	/
AUR62021056-RA	MSTRG.1418	Chr00	34152804	34159351	=	1087	0.999998	coding	/
MSTRG.1419.1	MSTRG.1419	Chr00	34175536	34186652	j	5201	1	coding	/
MSTRG.1419.2	MSTRG.1419	Chr00	34175979	34186652	k	4903	1	coding	/
AUR62021057-RA	MSTRG.1419	Chr00	34179963	34186652	=	4846	1	coding	/
MSTRG.1420.1	MSTRG.1420	Chr00	34185999	34186289	x	291	0.00315366	noncoding	LncRNA
MSTRG.1421.1	MSTRG.1421	Chr00	34187597	34187816	u	220	0.0181637	noncoding	LncRNA
MSTRG.1422.1	MSTRG.1422	Chr00	34200856	34201454	u	599	0.640746	coding	/
MSTRG.1423.1	MSTRG.1423	Chr00	34206380	34206690	u	311	0.0770812	noncoding	LncRNA
MSTRG.1424.1	MSTRG.1424	Chr00	34207048	34207996	u	949	0.116265	noncoding	LncRNA
AUR62021059-RA	MSTRG.1425	Chr00	34210900	34214725	=	954	1	coding	/
MSTRG.1426.1	MSTRG.1426	Chr00	34212365	34214230	x	1866	0.0548199	noncoding	LncRNA
MSTRG.1427.1	MSTRG.1427	Chr00	34189927	34198130	k	5154	1	coding	/
AUR62021058-RA	MSTRG.1427	Chr00	34191016	34198130	=	4780	1	coding	/
MSTRG.1428.1	MSTRG.1428	Chr00	34197704	34197998	x	295	0.0116264	noncoding	LncRNA
MSTRG.1429.1	MSTRG.1429	Chr00	34267366	34267641	u	276	0.0153578	noncoding	LncRNA
MSTRG.1430.1	MSTRG.1430	Chr00	34283409	34283762	u	354	0.0171822	noncoding	LncRNA
AUR62021068-RA	MSTRG.1431	Chr00	34284296	34286338	=	705	0.213912	noncoding	LncRNA
MSTRG.1432.1	MSTRG.1432	Chr00	34268927	34280220	n	4485	1	coding	/
AUR62021063-RA	MSTRG.1432	Chr00	34269084	34273478	=	2836	1	coding	/
AUR62021064-RA	MSTRG.1432	Chr00	34274777	34276432	=	1656	1	coding	/
MSTRG.1432.4	MSTRG.1432	Chr00	34276449	34280220	j	1637	0.0387895	noncoding	LncRNA
AUR62021065-RA	MSTRG.1432	Chr00	34278508	34280220	=	1279	1	coding	/
MSTRG.1433.1	MSTRG.1433	Chr00	34269363	34269654	x	292	0.0106738	noncoding	LncRNA
MSTRG.1434.1	MSTRG.1434	Chr00	34271466	34271853	x	388	0.0291495	noncoding	LncRNA
MSTRG.1435.1	MSTRG.1435	Chr00	34290229	34290669	u	441	0.0271847	noncoding	LncRNA
MSTRG.1436.1	MSTRG.1436	Chr00	34287045	34288024	x	980	0.635817	coding	/
AUR62021069-RA	MSTRG.1437	Chr00	34287078	34287986	=	909	0.999967	coding	/
MSTRG.1438.1	MSTRG.1438	Chr00	34293069	34294772	x	1704	0.0185492	noncoding	LncRNA
AUR62021070-RA	MSTRG.1439	Chr00	34293112	34294044	=	933	0.999997	coding	/
MSTRG.1440.1	MSTRG.1440	Chr00	34235149	34254408	j	9923	1	coding	/
MSTRG.1440.2	MSTRG.1440	Chr00	34235173	34242279	j	4868	1	coding	/
MSTRG.1440.3	MSTRG.1440	Chr00	34235368	34242279	j	4484	1	coding	/
AUR62021061-RA	MSTRG.1440	Chr00	34235979	34249789	=	8378	1	coding	/
MSTRG.1440.5	MSTRG.1440	Chr00	34251704	34260630	x	749	0.991925	coding	/
MSTRG.1441.1	MSTRG.1441	Chr00	34235592	34236037	x	446	0.0387179	noncoding	LncRNA
MSTRG.1442.1	MSTRG.1442	Chr00	34237559	34242701	x	2239	0.0859522	noncoding	LncRNA
MSTRG.1442.2	MSTRG.1442	Chr00	34237613	34239606	x	1707	0.0270056	noncoding	LncRNA
MSTRG.1442.3	MSTRG.1442	Chr00	34237613	34239606	x	1464	0.0279854	noncoding	LncRNA
MSTRG.1442.4	MSTRG.1442	Chr00	34239607	34242701	x	643	0.0859382	noncoding	LncRNA
MSTRG.1443.1	MSTRG.1443	Chr00	34244076	34244815	x	740	0.154974	noncoding	LncRNA
MSTRG.1444.1	MSTRG.1444	Chr00	34245488	34245704	x	217	0.0669001	noncoding	LncRNA
MSTRG.1445.1	MSTRG.1445	Chr00	34251879	34252236	p	358	0.0197114	noncoding	LncRNA
AUR62021062-RA	MSTRG.1446	Chr00	34253699	34266214	=	8418	1	coding	/
MSTRG.1447.1	MSTRG.1447	Chr00	34264663	34264960	x	298	0.0207523	noncoding	LncRNA
MSTRG.1448.1	MSTRG.1448	Chr00	34297462	34301813	k	2969	1	coding	/
AUR62021071-RA	MSTRG.1448	Chr00	34299595	34301813	=	2219	1	coding	/
MSTRG.1449.1	MSTRG.1449	Chr00	34301942	34309413	m	2345	1	coding	/
AUR62021072-RA	MSTRG.1449	Chr00	34302179	34309413	=	1975	1	coding	/
MSTRG.1450.1	MSTRG.1450	Chr00	34307020	34307501	x	482	0.116143	noncoding	LncRNA
MSTRG.1451.1	MSTRG.1451	Chr00	34309030	34309307	x	278	0.0041985	noncoding	LncRNA
AUR62021073-RA	MSTRG.1452	Chr00	34310770	34322127	=	4017	1	coding	/
MSTRG.1452.2	MSTRG.1452	Chr00	34310786	34322127	j	4404	1	coding	/
MSTRG.1453.1	MSTRG.1453	Chr00	34314289	34314844	i	556	0.00901215	noncoding	LncRNA
MSTRG.1454.1	MSTRG.1454	Chr00	34362353	34366565	j	2904	1	coding	/
MSTRG.1454.2	MSTRG.1454	Chr00	34362499	34366565	j	2828	1	coding	/
AUR62021077-RA	MSTRG.1454	Chr00	34362638	34366565	=	2621	1	coding	/
MSTRG.1455.1	MSTRG.1455	Chr00	34379277	34379565	u	289	0.00447298	noncoding	LncRNA
MSTRG.1456.1	MSTRG.1456	Chr00	34369448	34377523	n	1496	0.992705	coding	/
MSTRG.1456.2	MSTRG.1456	Chr00	34369489	34377523	n	1618	0.995069	coding	/
MSTRG.1456.3	MSTRG.1456	Chr00	34369512	34377523	n	1892	0.984581	coding	/
AUR62021078-RA	MSTRG.1456	Chr00	34376312	34377523	=	993	0.999647	coding	/
MSTRG.1457.1	MSTRG.1457	Chr00	34369874	34370087	u	214	0.0121311	noncoding	LncRNA
MSTRG.1458.1	MSTRG.1458	Chr00	34374876	34377523	x	2648	0.11993	noncoding	LncRNA
MSTRG.1459.1	MSTRG.1459	Chr00	34394077	34394671	u	595	0.028483	noncoding	LncRNA
MSTRG.1460.1	MSTRG.1460	Chr00	34409172	34409724	u	553	0.0148448	noncoding	LncRNA
MSTRG.1461.1	MSTRG.1461	Chr00	34415166	34415509	u	344	0.00502678	noncoding	LncRNA
MSTRG.1462.1	MSTRG.1462	Chr00	34429084	34429932	u	849	0.0289675	noncoding	LncRNA
MSTRG.1463.1	MSTRG.1463	Chr00	34333683	34345199	j	1973	0.818141	coding	/
MSTRG.1463.2	MSTRG.1463	Chr00	34333810	34345199	j	1850	1	coding	/
MSTRG.1463.3	MSTRG.1463	Chr00	34333913	34360702	j	2932	1	coding	/
MSTRG.1463.4	MSTRG.1463	Chr00	34333913	34361962	j	2983	1	coding	/
AUR62021074-RA	MSTRG.1463	Chr00	34333992	34344136	=	1185	0.999959	coding	/
AUR62021076-RA	MSTRG.1463	Chr00	34352412	34360702	=	2145	1	coding	/
MSTRG.1463.7	MSTRG.1463	Chr00	34360112	34361795	j	1445	0.109047	noncoding	LncRNA
MSTRG.1464.1	MSTRG.1464	Chr00	34344447	34345190	u	744	0.111475	noncoding	LncRNA
MSTRG.1465.1	MSTRG.1465	Chr00	34347014	34350154	x	3141	0.0296865	noncoding	LncRNA
AUR62021075-RA	MSTRG.1466	Chr00	34347134	34350154	=	3021	1	coding	/
MSTRG.1467.1	MSTRG.1467	Chr00	34357263	34357703	i	441	0.00580301	noncoding	LncRNA
MSTRG.1468.1	MSTRG.1468	Chr00	34360003	34360315	x	313	0.00638338	noncoding	LncRNA
MSTRG.1469.1	MSTRG.1469	Chr00	34430444	34433635	u	411	0.0187885	noncoding	LncRNA
MSTRG.1470.1	MSTRG.1470	Chr00	34434209	34434500	u	292	0.00928767	noncoding	LncRNA
MSTRG.1471.1	MSTRG.1471	Chr00	34388196	34392246	m	3104	1	coding	/
MSTRG.1471.2	MSTRG.1471	Chr00	34388198	34392246	n	3624	1	coding	/
AUR62021079-RA	MSTRG.1471	Chr00	34388736	34392246	=	2509	1	coding	/
MSTRG.1472.1	MSTRG.1472	Chr00	34388510	34390054	x	1265	0.101511	noncoding	LncRNA
MSTRG.1473.1	MSTRG.1473	Chr00	34457916	34458330	u	415	0.0170237	noncoding	LncRNA
MSTRG.1474.1	MSTRG.1474	Chr00	34445314	34451147	m	3230	1	coding	/
AUR62021080-RA	MSTRG.1474	Chr00	34445629	34451147	=	2892	1	coding	/
MSTRG.1475.1	MSTRG.1475	Chr00	34474229	34474492	u	264	0.0138542	noncoding	LncRNA
AUR62021081-RA	MSTRG.1476	Chr00	34462135	34466728	=	2116	0.999021	coding	/
MSTRG.1476.2	MSTRG.1476	Chr00	34462145	34466728	j	2099	0.570407	coding	/
AUR62021082-RA	MSTRG.1477	Chr00	34466738	34470207	=	1410	0.999977	coding	/
MSTRG.1478.1	MSTRG.1478	Chr00	34487867	34488301	u	435	0.0269842	noncoding	LncRNA
MSTRG.1479.1	MSTRG.1479	Chr00	34482274	34484067	x	1794	0.993894	coding	/
AUR62021083-RA	MSTRG.1480	Chr00	34482835	34484041	=	1082	0.994971	coding	/
MSTRG.1481.1	MSTRG.1481	Chr00	34500725	34501295	u	571	0.00856999	noncoding	LncRNA
MSTRG.1482.1	MSTRG.1482	Chr00	34495014	34498914	j	3645	1	coding	/
AUR62021084-RA	MSTRG.1482	Chr00	34495368	34498914	=	3288	1	coding	/
MSTRG.1483.1	MSTRG.1483	Chr00	34531936	34532209	u	274	0.00383124	noncoding	LncRNA
MSTRG.1484.1	MSTRG.1484	Chr00	34536582	34536846	u	265	0.00321492	noncoding	LncRNA
MSTRG.1485.1	MSTRG.1485	Chr00	34533776	34535930	x	2155	0.0666005	noncoding	LncRNA
AUR62021088-RA	MSTRG.1486	Chr00	34533918	34535719	=	1170	1	coding	/
MSTRG.1487.1	MSTRG.1487	Chr00	34539459	34539768	u	310	0.0141955	noncoding	LncRNA
AUR62021089-RA	MSTRG.1488	Chr00	34540748	34542166	=	1419	1	coding	/
MSTRG.1489.1	MSTRG.1489	Chr00	34545500	34545848	u	349	0.0161759	noncoding	LncRNA
MSTRG.1490.1	MSTRG.1490	Chr00	34579801	34580068	u	268	0.00648843	noncoding	LncRNA
AUR62021096-RA	MSTRG.1491	Chr00	34582360	34586802	=	1772	1	coding	/
MSTRG.1492.1	MSTRG.1492	Chr00	34557492	34571536	m	3129	1	coding	/
AUR62021091-RA	MSTRG.1492	Chr00	34557585	34559013	=	1265	1	coding	/
AUR62021093-RA	MSTRG.1492	Chr00	34569985	34571536	=	1455	1	coding	/
AUR62021092-RA	MSTRG.1493	Chr00	34562077	34566742	=	2557	1	coding	/
MSTRG.1493.2	MSTRG.1493	Chr00	34564386	34579283	k	3860	0.909858	coding	/
AUR62021094-RA	MSTRG.1493	Chr00	34572702	34574558	=	1301	1	coding	/
AUR62021095-RA	MSTRG.1493	Chr00	34574559	34579283	=	1582	1	coding	/
MSTRG.1494.1	MSTRG.1494	Chr00	34567998	34568558	u	561	0.021579	noncoding	LncRNA
MSTRG.1495.1	MSTRG.1495	Chr00	34569233	34573250	x	4018	0.124892	noncoding	LncRNA
MSTRG.1496.1	MSTRG.1496	Chr00	34573799	34574159	x	361	0.0358647	noncoding	LncRNA
MSTRG.1497.1	MSTRG.1497	Chr00	34598677	34599017	u	341	0.0122062	noncoding	LncRNA
AUR62021097-RA	MSTRG.1498	Chr00	34587496	34592118	=	3351	1	coding	/
AUR62021099-RA	MSTRG.1499	Chr00	34614720	34628427	=	6015	1	coding	/
MSTRG.1500.1	MSTRG.1500	Chr00	34625884	34626199	i	316	0.0235444	noncoding	LncRNA
MSTRG.1501.1	MSTRG.1501	Chr00	34660628	34660893	u	266	0.0208331	noncoding	LncRNA
MSTRG.1502.1	MSTRG.1502	Chr00	34629319	34640955	j	3672	1	coding	/
AUR62021100-RA	MSTRG.1502	Chr00	34629319	34640406	=	3682	1	coding	/
MSTRG.1502.3	MSTRG.1502	Chr00	34634266	34636134	j	1240	0.999893	coding	/
MSTRG.1503.1	MSTRG.1503	Chr00	34636432	34636760	x	329	0.0409671	noncoding	LncRNA
MSTRG.1504.1	MSTRG.1504	Chr00	34663432	34663747	u	316	0.0125305	noncoding	LncRNA
AUR62021101-RA	MSTRG.1505	Chr00	34656729	34658003	=	1068	0.73387	coding	/
MSTRG.1506.1	MSTRG.1506	Chr00	34657261	34657985	x	725	0.0468547	noncoding	LncRNA
AUR62021102-RA	MSTRG.1507	Chr00	34666383	34673731	=	1939	1	coding	/
MSTRG.1507.2	MSTRG.1507	Chr00	34666388	34673731	n	2211	1	coding	/
MSTRG.1507.3	MSTRG.1507	Chr00	34666426	34673731	n	2167	1	coding	/
MSTRG.1508.1	MSTRG.1508	Chr00	34672152	34672438	i	287	0.00646076	noncoding	LncRNA
MSTRG.1509.1	MSTRG.1509	Chr00	34674713	34681977	j	2473	1	coding	/
MSTRG.1509.2	MSTRG.1509	Chr00	34674802	34681977	k	2219	1	coding	/
MSTRG.1509.3	MSTRG.1509	Chr00	34674994	34681977	j	2355	1	coding	/
AUR62021103-RA	MSTRG.1509	Chr00	34675228	34681977	=	2063	1	coding	/
AUR62021104-RA	MSTRG.1510	Chr00	34682074	34689367	=	1519	1	coding	/
MSTRG.1510.2	MSTRG.1510	Chr00	34682090	34685619	j	1296	0.999943	coding	/
MSTRG.1511.1	MSTRG.1511	Chr00	34685519	34685780	i	262	0.009931	noncoding	LncRNA
MSTRG.1512.1	MSTRG.1512	Chr00	34693941	34708619	n	2269	1	coding	/
AUR62021105-RA	MSTRG.1512	Chr00	34694152	34708619	=	1980	1	coding	/
MSTRG.1513.1	MSTRG.1513	Chr00	34719478	34722160	o	1455	0.999994	coding	/
MSTRG.1513.2	MSTRG.1513	Chr00	34719583	34722160	o	1389	0.999994	coding	/
AUR62021106-RA	MSTRG.1513	Chr00	34720058	34722160	=	1174	0.999254	coding	/
MSTRG.1514.1	MSTRG.1514	Chr00	34720119	34722161	x	2043	0.145917	noncoding	LncRNA
MSTRG.1515.1	MSTRG.1515	Chr00	34723919	34725414	o	1434	0.998427	coding	/
AUR62021108-RA	MSTRG.1515	Chr00	34724286	34725414	=	1129	0.999996	coding	/
MSTRG.1516.1	MSTRG.1516	Chr00	34723942	34725382	n	1441	0.299606	noncoding	LncRNA
AUR62021107-RA	MSTRG.1516	Chr00	34724126	34732581	=	2984	1	coding	/
MSTRG.1517.1	MSTRG.1517	Chr00	34743847	34744640	u	794	0.0103644	noncoding	LncRNA
MSTRG.1518.1	MSTRG.1518	Chr00	34747185	34747680	u	496	0.0333509	noncoding	LncRNA
AUR62021109-RA	MSTRG.1519	Chr00	34733468	34740737	=	1851	1	coding	/
MSTRG.1519.2	MSTRG.1519	Chr00	34733513	34740737	j	1863	1	coding	/
MSTRG.1520.1	MSTRG.1520	Chr00	34735458	34735735	x	278	0.0238219	noncoding	LncRNA
AUR62021114-RA	MSTRG.1521	Chr00	34773847	34774047	=	201	0.189872	noncoding	LncRNA
MSTRG.1522.1	MSTRG.1522	Chr00	34789025	34789503	u	479	0.0530235	noncoding	LncRNA
MSTRG.1523.1	MSTRG.1523	Chr00	34749390	34762686	k	2865	0.999978	coding	/
AUR62021110-RA	MSTRG.1523	Chr00	34749477	34756655	=	933	1	coding	/
MSTRG.1523.3	MSTRG.1523	Chr00	34754474	34762993	j	2143	1	coding	/
AUR62021111-RA	MSTRG.1523	Chr00	34757315	34762817	=	2409	1	coding	/
MSTRG.1523.5	MSTRG.1523	Chr00	34760250	34760920	j	363	0.0429231	noncoding	LncRNA
MSTRG.1524.1	MSTRG.1524	Chr00	34761053	34761265	x	213	0.00570311	noncoding	LncRNA
MSTRG.1525.1	MSTRG.1525	Chr00	34762124	34762414	x	291	0.0204315	noncoding	LncRNA
AUR62021112-RA	MSTRG.1526	Chr00	34763079	34763630	=	552	0.995392	coding	/
MSTRG.1527.1	MSTRG.1527	Chr00	34763384	34773035	j	2153	0.999961	coding	/
AUR62021113-RA	MSTRG.1527	Chr00	34763945	34773035	=	1433	0.999852	coding	/
MSTRG.1528.1	MSTRG.1528	Chr00	34777827	34779553	j	1005	0.51753	coding	/
MSTRG.1528.2	MSTRG.1528	Chr00	34778232	34783181	k	1259	0.986083	coding	/
AUR62021115-RA	MSTRG.1528	Chr00	34778903	34783181	=	1009	0.994557	coding	/
MSTRG.1528.4	MSTRG.1528	Chr00	34781900	34783181	j	1018	0.658094	coding	/
MSTRG.1529.1	MSTRG.1529	Chr00	34779790	34780088	i	299	1.01816e-05	noncoding	LncRNA
AUR62021118-RA	MSTRG.1530	Chr00	34802687	34806293	=	2666	1	coding	/
MSTRG.1531.1	MSTRG.1531	Chr00	34790057	34794073	k	1256	0.999893	coding	/
AUR62021116-RA	MSTRG.1531	Chr00	34790527	34794073	=	1062	0.998419	coding	/
MSTRG.1531.3	MSTRG.1531	Chr00	34792909	34794073	j	922	0.889007	coding	/
MSTRG.1531.4	MSTRG.1531	Chr00	34792929	34794073	j	899	0.911944	coding	/
MSTRG.1532.1	MSTRG.1532	Chr00	34793413	34793693	x	281	0.0540285	noncoding	LncRNA
AUR62021117-RA	MSTRG.1533	Chr00	34794149	34800896	=	2432	1	coding	/
MSTRG.1534.1	MSTRG.1534	Chr00	34794456	34794763	x	308	0.0668697	noncoding	LncRNA
MSTRG.1535.1	MSTRG.1535	Chr00	34800714	34801073	x	360	0.021644	noncoding	LncRNA
MSTRG.1536.1	MSTRG.1536	Chr00	34809169	34816902	j	1583	0.999994	coding	/
AUR62021119-RA	MSTRG.1536	Chr00	34809170	34816902	=	1552	0.999997	coding	/
MSTRG.1537.1	MSTRG.1537	Chr00	34817749	34822195	j	1342	0.985731	coding	/
AUR62021120-RA	MSTRG.1537	Chr00	34817780	34820312	=	780	0.981536	coding	/
AUR62021122-RA	MSTRG.1538	Chr00	34829142	34832620	=	1293	1	coding	/
MSTRG.1539.1	MSTRG.1539	Chr00	34830868	34831219	i	352	2.43154e-06	noncoding	LncRNA
AUR62021121-RA	MSTRG.1540	Chr00	34822470	34829090	=	1827	1	coding	/
MSTRG.1541.1	MSTRG.1541	Chr00	34825082	34825382	i	301	0.0113962	noncoding	LncRNA
MSTRG.1542.1	MSTRG.1542	Chr00	34825710	34826007	i	298	0.00440551	noncoding	LncRNA
AUR62021123-RA	MSTRG.1543	Chr00	34834306	34839424	=	1682	1	coding	/
MSTRG.1544.1	MSTRG.1544	Chr00	34861207	34861530	u	324	0.0289986	noncoding	LncRNA
MSTRG.1545.1	MSTRG.1545	Chr00	34862399	34862921	u	523	0.0811355	noncoding	LncRNA
MSTRG.1546.1	MSTRG.1546	Chr00	34847487	34852243	j	1839	0.974955	coding	/
AUR62021124-RA	MSTRG.1546	Chr00	34847578	34852243	=	1804	0.999995	coding	/
MSTRG.1547.1	MSTRG.1547	Chr00	34874429	34878052	u	3624	0.0306077	noncoding	LncRNA
MSTRG.1547.2	MSTRG.1547	Chr00	34874755	34878052	u	3134	0.0289837	noncoding	LncRNA
MSTRG.1548.1	MSTRG.1548	Chr00	34874786	34877512	u	1218	0.135408	noncoding	LncRNA
AUR62021125-RA	MSTRG.1549	Chr00	34863051	34868666	=	3287	1	coding	/
MSTRG.1549.2	MSTRG.1549	Chr00	34864264	34868666	n	2864	1	coding	/
MSTRG.1550.1	MSTRG.1550	Chr00	34863875	34872631	k	1730	1	coding	/
MSTRG.1550.2	MSTRG.1550	Chr00	34863945	34872631	k	1613	0.999999	coding	/
AUR62021126-RA	MSTRG.1550	Chr00	34871385	34872631	=	1247	1	coding	/
MSTRG.1551.1	MSTRG.1551	Chr00	34867000	34867710	x	711	0.0833109	noncoding	LncRNA
MSTRG.1552.1	MSTRG.1552	Chr00	34868205	34868611	x	407	0.00742786	noncoding	LncRNA
MSTRG.1553.1	MSTRG.1553	Chr00	34871124	34872761	x	1638	0.0624848	noncoding	LncRNA
MSTRG.1554.1	MSTRG.1554	Chr00	34893083	34893401	u	319	1.83638e-05	noncoding	LncRNA
MSTRG.1555.1	MSTRG.1555	Chr00	34893694	34894007	u	314	0.0189419	noncoding	LncRNA
MSTRG.1556.1	MSTRG.1556	Chr00	34895092	34895651	u	560	0.0131885	noncoding	LncRNA
MSTRG.1557.1	MSTRG.1557	Chr00	34881566	34884938	k	2208	0.996082	coding	/
MSTRG.1557.2	MSTRG.1557	Chr00	34881566	34884938	k	1971	0.998183	coding	/
AUR62021127-RA	MSTRG.1557	Chr00	34883429	34884938	k	1510	0.99909	coding	/
AUR62021128-RA	MSTRG.1558	Chr00	34885452	34890185	=	1029	0.331727	noncoding	LncRNA
MSTRG.1559.1	MSTRG.1559	Chr00	34900606	34901414	u	519	0.0258777	noncoding	LncRNA
MSTRG.1560.1	MSTRG.1560	Chr00	34901471	34908270	k	5520	1	coding	/
AUR62021130-RA	MSTRG.1560	Chr00	34905597	34908270	=	2674	1	coding	/
AUR62021129-RA	MSTRG.1561	Chr00	34901656	34904260	=	2338	1	coding	/
MSTRG.1561.2	MSTRG.1561	Chr00	34902048	34916472	o	2738	1	coding	/
MSTRG.1561.3	MSTRG.1561	Chr00	34902920	34904260	n	1341	0.0478433	noncoding	LncRNA
MSTRG.1561.4	MSTRG.1561	Chr00	34911469	34916771	k	4072	1	coding	/
MSTRG.1561.5	MSTRG.1561	Chr00	34911498	34919317	j	4373	1	coding	/
AUR62021131-RA	MSTRG.1561	Chr00	34913041	34916472	=	3432	1	coding	/
AUR62021132-RA	MSTRG.1561	Chr00	34918079	34934962	=	3330	1	coding	/
MSTRG.1561.8	MSTRG.1561	Chr00	34920944	34934962	n	2630	0.999184	coding	/
MSTRG.1562.1	MSTRG.1562	Chr00	34909164	34909450	u	287	0.00791436	noncoding	LncRNA
MSTRG.1563.1	MSTRG.1563	Chr00	34912933	34916466	x	3534	0.398979	noncoding	LncRNA
MSTRG.1564.1	MSTRG.1564	Chr00	34917442	34917768	p	327	0.00960055	noncoding	LncRNA
MSTRG.1565.1	MSTRG.1565	Chr00	34923814	34924146	i	333	0.102924	noncoding	LncRNA
MSTRG.1566.1	MSTRG.1566	Chr00	34924393	34924972	i	580	0.175703	noncoding	LncRNA
AUR62021133-RA	MSTRG.1567	Chr00	34933774	34934525	=	603	0.999274	coding	/
MSTRG.1568.1	MSTRG.1568	Chr00	34935415	34944401	n	4835	0.999722	coding	/
MSTRG.1568.2	MSTRG.1568	Chr00	34935452	34939028	u	1838	0.145461	noncoding	LncRNA
MSTRG.1568.3	MSTRG.1568	Chr00	34939191	34944401	k	2103	1	coding	/
AUR62021134-RA	MSTRG.1568	Chr00	34939705	34944401	=	1681	1	coding	/
MSTRG.1569.1	MSTRG.1569	Chr00	34940677	34940900	i	224	0.0236075	noncoding	LncRNA
MSTRG.1570.1	MSTRG.1570	Chr00	34969070	34969334	u	265	0.0503943	noncoding	LncRNA
MSTRG.1571.1	MSTRG.1571	Chr00	34967155	34967895	u	741	0.04875	noncoding	LncRNA
MSTRG.1572.1	MSTRG.1572	Chr00	34968083	34968583	u	501	0.00489906	noncoding	LncRNA
AUR62021135-RA	MSTRG.1573	Chr00	34950546	34960481	=	4341	1	coding	/
MSTRG.1573.2	MSTRG.1573	Chr00	34954201	34954482	n	282	0.0128242	noncoding	LncRNA
MSTRG.1573.3	MSTRG.1573	Chr00	34955790	34960481	j	2716	1	coding	/
MSTRG.1574.1	MSTRG.1574	Chr00	34955676	34956031	x	356	0.057579	noncoding	LncRNA
MSTRG.1575.1	MSTRG.1575	Chr00	34958073	34958771	x	699	0.00611926	noncoding	LncRNA
MSTRG.1576.1	MSTRG.1576	Chr00	34981560	34981870	u	311	0.0195479	noncoding	LncRNA
MSTRG.1577.1	MSTRG.1577	Chr00	34977188	34978392	j	1013	0.902625	coding	/
AUR62021136-RA	MSTRG.1577	Chr00	34977263	34978392	=	855	0.996636	coding	/
AUR62021137-RA	MSTRG.1578	Chr00	34978536	34980573	=	1022	0.999636	coding	/
MSTRG.1579.1	MSTRG.1579	Chr00	35008509	35009406	u	898	0.0442482	noncoding	LncRNA
MSTRG.1580.1	MSTRG.1580	Chr00	34984064	34987234	m	3171	1	coding	/
AUR62021138-RA	MSTRG.1580	Chr00	34984658	34987234	=	2357	1	coding	/
MSTRG.1581.1	MSTRG.1581	Chr00	35011276	35011686	u	411	0.0291243	noncoding	LncRNA
MSTRG.1582.1	MSTRG.1582	Chr00	35014896	35015420	u	525	0.0105014	noncoding	LncRNA
MSTRG.1583.1	MSTRG.1583	Chr00	35019611	35019863	u	253	0.00673136	noncoding	LncRNA
MSTRG.1584.1	MSTRG.1584	Chr00	35034210	35034425	p	216	0.0237702	noncoding	LncRNA
AUR62021140-RA	MSTRG.1585	Chr00	35034595	35035824	=	1230	1	coding	/
AUR62021139-RA	MSTRG.1586	Chr00	35026575	35033529	=	2048	1	coding	/
AUR62021142-RA	MSTRG.1587	Chr00	35042093	35045930	=	1382	0.999993	coding	/
MSTRG.1587.2	MSTRG.1587	Chr00	35042144	35045930	j	1289	0.999982	coding	/
MSTRG.1587.3	MSTRG.1587	Chr00	35042144	35045930	j	1271	0.999986	coding	/
MSTRG.1588.1	MSTRG.1588	Chr00	35046992	35048208	p	1217	0.999984	coding	/
MSTRG.1589.1	MSTRG.1589	Chr00	35049078	35049351	p	274	0.185554	noncoding	LncRNA
MSTRG.1590.1	MSTRG.1590	Chr00	35049923	35051165	x	1243	0.490872	noncoding	LncRNA
AUR62021143-RA	MSTRG.1591	Chr00	35050133	35051074	=	942	1	coding	/
MSTRG.1592.1	MSTRG.1592	Chr00	35067101	35067458	u	358	0.00581601	noncoding	LncRNA
MSTRG.1593.1	MSTRG.1593	Chr00	35067940	35068347	u	408	0.0502059	noncoding	LncRNA
MSTRG.1594.1	MSTRG.1594	Chr00	35055165	35061104	k	1218	1	coding	/
AUR62021144-RA	MSTRG.1594	Chr00	35060718	35061104	=	387	0.908929	coding	/
MSTRG.1595.1	MSTRG.1595	Chr00	35058010	35058275	u	266	0.0130328	noncoding	LncRNA
AUR62021145-RA	MSTRG.1596	Chr00	35075749	35079351	=	1685	1	coding	/
AUR62021146-RA	MSTRG.1597	Chr00	35079997	35086834	=	4301	1	coding	/
MSTRG.1597.2	MSTRG.1597	Chr00	35080033	35087585	m	4614	1	coding	/
MSTRG.1597.3	MSTRG.1597	Chr00	35080049	35087585	m	4970	1	coding	/
MSTRG.1597.4	MSTRG.1597	Chr00	35080131	35087206	j	4615	1	coding	/
MSTRG.1598.1	MSTRG.1598	Chr00	35084095	35086558	x	2464	0.119854	noncoding	LncRNA
MSTRG.1599.1	MSTRG.1599	Chr00	35103189	35103419	u	231	0.0136938	noncoding	LncRNA
MSTRG.1600.1	MSTRG.1600	Chr00	35106018	35106759	u	742	0.103213	noncoding	LncRNA
AUR62021147-RA	MSTRG.1601	Chr00	35088066	35096404	=	3575	1	coding	/
MSTRG.1601.2	MSTRG.1601	Chr00	35089161	35091069	j	1092	0.999353	coding	/
AUR62021148-RA	MSTRG.1602	Chr00	35097158	35101648	=	1538	0.999999	coding	/
MSTRG.1603.1	MSTRG.1603	Chr00	35107842	35119562	j	3918	1	coding	/
AUR62021149-RA	MSTRG.1603	Chr00	35107842	35118607	=	5665	1	coding	/
MSTRG.1603.3	MSTRG.1603	Chr00	35113824	35119562	j	2474	1	coding	/
MSTRG.1604.1	MSTRG.1604	Chr00	35110377	35111375	x	999	0.0588933	noncoding	LncRNA
MSTRG.1605.1	MSTRG.1605	Chr00	35113128	35113343	i	216	0.00446969	noncoding	LncRNA
MSTRG.1606.1	MSTRG.1606	Chr00	35115001	35115372	x	372	0.0987168	noncoding	LncRNA
MSTRG.1607.1	MSTRG.1607	Chr00	35119060	35119373	u	314	0.00817319	noncoding	LncRNA
MSTRG.1608.1	MSTRG.1608	Chr00	35137351	35137713	p	363	0.0677674	noncoding	LncRNA
MSTRG.1609.1	MSTRG.1609	Chr00	35138005	35138269	p	265	0.0181126	noncoding	LncRNA
MSTRG.1610.1	MSTRG.1610	Chr00	35130595	35134485	j	1275	0.999998	coding	/
AUR62021151-RA	MSTRG.1610	Chr00	35130643	35134485	=	993	0.999871	coding	/
MSTRG.1611.1	MSTRG.1611	Chr00	35122101	35130348	j	4416	1	coding	/
MSTRG.1611.2	MSTRG.1611	Chr00	35122126	35130348	j	4738	1	coding	/
AUR62021150-RA	MSTRG.1611	Chr00	35122414	35130348	=	4048	1	coding	/
MSTRG.1612.1	MSTRG.1612	Chr00	35125199	35125669	x	471	0.211964	noncoding	LncRNA
MSTRG.1613.1	MSTRG.1613	Chr00	35129122	35130349	x	1228	0.025526	noncoding	LncRNA
MSTRG.1614.1	MSTRG.1614	Chr00	35148798	35149108	u	311	0.0342836	noncoding	LncRNA
AUR62021152-RA	MSTRG.1615	Chr00	35139492	35148213	=	1489	0.999998	coding	/
MSTRG.1615.2	MSTRG.1615	Chr00	35139547	35143481	j	1321	0.999999	coding	/
MSTRG.1615.3	MSTRG.1615	Chr00	35139564	35143481	j	1301	0.999999	coding	/
MSTRG.1616.1	MSTRG.1616	Chr00	35143849	35144204	i	356	0.00310718	noncoding	LncRNA
MSTRG.1617.1	MSTRG.1617	Chr00	35144330	35147382	i	1314	0.534411	coding	/
MSTRG.1618.1	MSTRG.1618	Chr00	35150525	35150864	x	340	0.00565422	noncoding	LncRNA
[truncated: 232,389+ more rows]
