# Supplementary material for: Transcriptome dynamics uncovers long non-coding RNAs response to salinity stress in Chenopodium quinoa
Source: Front Plant Sci. 2022 Sep 20;13:988845. doi: 10.3389/fpls.2022.988845 (PMC9530330; doi:10.3389/fpls.2022.988845)
Supplement: Supplementary file 4 [file Table_4.XLSX]

## Sheet: 0.5hDEG
Table S4 The Differentially expressed transcripts under salt stress(0.5h, 2h and 24h)
test_id	sample_1	sample_2	status	value_1	value_2	log2(fold_change)	test_stat	p_value	q_value	CPC_coding	LncRNA
AUR62000148-RA	0h	5h	OK	3.22056	14.8114	2.20132	4.58569	5e-05	0.00591181	coding	/
AUR62000176-RA	0h	5h	OK	17.0565	61.914	1.85995	4.30169	5e-05	0.00591181	coding	/
AUR62000259-RA	0h	5h	OK	6.49944	17.9629	1.46663	2.76946	5e-05	0.00591181	coding	/
AUR62000335-RA	0h	5h	OK	2.49441	6.24925	1.32498	2.19106	0.00065	0.0476453	coding	/
AUR62000873-RA	0h	5h	OK	11.9105	28.375	1.25238	2.104	0.00025	0.022892	coding	/
AUR62001178-RA	0h	5h	OK	0.760658	2.83751	1.89931	2.82662	5e-05	0.00591181	coding	/
AUR62001233-RA	0h	5h	OK	0.380356	3.28893	3.1122	3.5207	5e-05	0.00591181	coding	/
AUR62001302-RA	0h	5h	OK	23.8221	9.98917	-1.25386	-2.51118	5e-05	0.00591181	coding	/
AUR62001446-RA	0h	5h	OK	1.18718	11.8387	3.31791	4.13581	5e-05	0.00591181	coding	/
AUR62001467-RA	0h	5h	OK	5.90106	14.3753	1.28454	2.57927	5e-05	0.00591181	coding	/
AUR62001534-RA	0h	5h	OK	7.27314	65.5436	3.1718	2.96076	0.0001	0.0105361	coding	/
AUR62001619-RA	0h	5h	OK	4.21212	10.8914	1.37057	2.58633	0.00015	0.0146848	coding	/
AUR62001620-RA	0h	5h	OK	7.48985	17.3457	1.21157	2.66006	5e-05	0.00591181	coding	/
AUR62002035-RA	0h	5h	OK	5.35876	26.1318	2.28583	4.49794	5e-05	0.00591181	coding	/
AUR62002150-RA	0h	5h	OK	24.3836	11.4329	-1.09272	-2.70809	5e-05	0.00591181	coding	/
AUR62002970-RA	0h	5h	OK	5.63628	1.79788	-1.64844	-2.64073	5e-05	0.00591181	coding	/
AUR62003152-RA	0h	5h	OK	25.1464	59.9802	1.25413	3.18141	5e-05	0.00591181	coding	/
AUR62003204-RA	0h	5h	OK	7.91169	18.1523	1.1981	2.52727	5e-05	0.00591181	coding	/
AUR62003358-RA	0h	5h	OK	7.90296	28.6483	1.85799	4.35592	5e-05	0.00591181	coding	/
AUR62003712-RA	0h	5h	OK	4.27868	12.6536	1.56431	2.40665	0.00015	0.0146848	coding	/
AUR62003765-RA	0h	5h	OK	3.39243	52.6891	3.95711	4.96615	5e-05	0.00591181	coding	/
AUR62004095-RA	0h	5h	OK	4.11501	10.2902	1.3223	2.16965	0.0004	0.0328453	coding	/
AUR62005223-RA	0h	5h	OK	7.34842	3.01379	-1.28586	-2.27277	0.00025	0.022892	coding	/
AUR62006130-RA	0h	5h	OK	0.767314	4.24821	2.46896	2.87695	0.00025	0.022892	coding	/
AUR62006208-RA	0h	5h	OK	4.32325	1.35711	-1.67158	-2.65739	5e-05	0.00591181	coding	/
AUR62006298-RA	0h	5h	OK	12.3214	56.0415	2.18533	5.41634	5e-05	0.00591181	coding	/
AUR62006427-RA	0h	5h	OK	6.23437	23.4488	1.9112	4.19465	5e-05	0.00591181	coding	/
AUR62006607-RA	0h	5h	OK	1.69413	5.066	1.5803	2.52931	5e-05	0.00591181	coding	/
AUR62006761-RA	0h	5h	OK	2.41825	8.30268	1.77962	2.44104	0.0001	0.0105361	coding	/
AUR62006885-RA	0h	5h	OK	17.2304	95.3724	2.46862	5.41932	5e-05	0.00591181	coding	/
AUR62007133-RA	0h	5h	OK	6.98026	35.8577	2.36093	5.52077	5e-05	0.00591181	coding	/
AUR62007808-RA	0h	5h	OK	27.5009	12.1002	-1.18445	-2.68996	5e-05	0.00591181	coding	/
AUR62007975-RA	0h	5h	OK	14.5273	35.9003	1.30523	2.71053	5e-05	0.00591181	noncoding	LncRNA
AUR62008467-RA	0h	5h	OK	3.12624	1.20685	-1.37318	-2.30228	0.0004	0.0328453	coding	/
AUR62008690-RA	0h	5h	OK	2.57401	5.88886	1.19397	2.18883	0.00055	0.0417928	coding	/
AUR62008963-RA	0h	5h	OK	20.2947	46.1427	1.185	2.88724	5e-05	0.00591181	coding	/
AUR62009228-RA	0h	5h	OK	2.03754	9.16259	2.16893	4.61792	5e-05	0.00591181	coding	/
AUR62009301-RA	0h	5h	OK	8.08986	29.0181	1.84277	4.4762	5e-05	0.00591181	coding	/
AUR62009433-RA	0h	5h	OK	1.94809	5.68698	1.5456	2.78257	5e-05	0.00591181	coding	/
AUR62009710-RA	0h	5h	OK	6.19968	15.599	1.33119	1.9775	0.00065	0.0476453	coding	/
AUR62009737-RA	0h	5h	OK	11.7693	4.29919	-1.45289	-2.55789	5e-05	0.00591181	coding	/
AUR62009740-RA	0h	5h	OK	18.9272	6.7226	-1.49337	-2.89063	5e-05	0.00591181	coding	/
AUR62009892-RA	0h	5h	OK	3.06679	6.95076	1.18044	2.23392	0.00035	0.0298807	coding	/
AUR62009895-RA	0h	5h	OK	1.05662	5.4852	2.37609	3.55537	5e-05	0.00591181	coding	/
AUR62009919-RA	0h	5h	OK	0.899668	23.9571	4.73492	5.71605	5e-05	0.00591181	coding	/
AUR62010762-RA	0h	5h	OK	3.98569	13.3353	1.74235	2.56692	0.00035	0.0298807	coding	/
AUR62010870-RA	0h	5h	OK	929.681	432.656	-1.10352	-2.48714	5e-05	0.00591181	coding	/
AUR62010938-RA	0h	5h	OK	20.4673	9.85	-1.05513	-2.25628	0.0002	0.0190967	coding	/
AUR62011210-RA	0h	5h	OK	3.18641	16.0986	2.33694	3.35296	5e-05	0.00591181	coding	/
AUR62011395-RA	0h	5h	OK	1.05708	5.76776	2.44793	4.12061	5e-05	0.00591181	coding	/
AUR62011431-RA	0h	5h	OK	7.56025	21.481	1.50656	2.84687	5e-05	0.00591181	coding	/
AUR62011606-RA	0h	5h	OK	22.9246	54.0828	1.23827	3.06233	5e-05	0.00591181	coding	/
AUR62011878-RA	0h	5h	OK	4.65803	24.9481	2.42114	4.2858	5e-05	0.00591181	coding	/
AUR62011973-RA	0h	5h	OK	1.44534	5.5805	1.94899	2.67891	5e-05	0.00591181	coding	/
AUR62012136-RA	0h	5h	OK	30.1246	102.353	1.76454	4.64152	5e-05	0.00591181	coding	/
AUR62012344-RA	0h	5h	OK	14.0471	33.3568	1.24771	2.90765	5e-05	0.00591181	coding	/
AUR62012456-RA	0h	5h	OK	11.1927	26.3122	1.23317	2.70085	5e-05	0.00591181	coding	/
AUR62012604-RA	0h	5h	OK	9.08757	3.08832	-1.55707	-2.63353	5e-05	0.00591181	coding	/
AUR62012951-RA	0h	5h	OK	2.04361	6.87241	1.7497	2.51744	0.00035	0.0298807	coding	/
AUR62013244-RA	0h	5h	OK	11.0478	2.25614	-2.29183	-3.20727	5e-05	0.00591181	coding	/
AUR62013277-RA	0h	5h	OK	7.88279	49.5513	2.65215	4.16762	5e-05	0.00591181	coding	/
AUR62013997-RA	0h	5h	OK	1.23263	7.92027	2.68381	3.73499	5e-05	0.00591181	coding	/
AUR62014540-RA	0h	5h	OK	8.17933	54.5981	2.7388	5.95564	5e-05	0.00591181	coding	/
AUR62014859-RA	0h	5h	OK	4.11823	12.5846	1.61157	3.46016	5e-05	0.00591181	coding	/
AUR62015220-RA	0h	5h	OK	3.54572	1.05275	-1.75191	-2.69253	5e-05	0.00591181	coding	/
AUR62016414-RA	0h	5h	OK	3.27997	18.0044	2.45659	5.92012	5e-05	0.00591181	coding	/
AUR62016663-RA	0h	5h	OK	1.39605	5.91716	2.08355	4.07128	5e-05	0.00591181	coding	/
AUR62016898-RA	0h	5h	OK	16.3682	66.0883	2.0135	4.65467	5e-05	0.00591181	coding	/
AUR62017675-RA	0h	5h	OK	16.5305	6.19441	-1.41609	-2.51056	5e-05	0.00591181	coding	/
AUR62018525-RA	0h	5h	OK	13.3929	6.07637	-1.14019	-2.13938	0.00025	0.022892	coding	/
AUR62018879-RA	0h	5h	OK	22.5649	83.728	1.89163	2.79039	5e-05	0.00591181	coding	/
AUR62018880-RA	0h	5h	OK	40.2587	152.671	1.92306	4.82819	5e-05	0.00591181	coding	/
AUR62018906-RA	0h	5h	OK	19.9306	111.688	2.48641	6.04702	5e-05	0.00591181	coding	/
AUR62018907-RA	0h	5h	OK	7.30489	61.1676	3.06583	6.42739	5e-05	0.00591181	coding	/
AUR62019498-RA	0h	5h	OK	3.49529	1.02475	-1.77014	-2.69382	5e-05	0.00591181	coding	/
AUR62019750-RA	0h	5h	OK	3.28172	9.06217	1.46541	2.78182	5e-05	0.00591181	coding	/
AUR62019763-RA	0h	5h	OK	6.23407	17.4778	1.48728	2.85673	5e-05	0.00591181	coding	/
AUR62019820-RA	0h	5h	OK	0.988413	9.91474	3.32639	3.39327	5e-05	0.00591181	coding	/
AUR62019904-RA	0h	5h	OK	107.306	48.9119	-1.13348	-2.81439	5e-05	0.00591181	coding	/
AUR62020159-RA	0h	5h	OK	5.64802	20.4433	1.85581	3.84019	5e-05	0.00591181	coding	/
AUR62020233-RA	0h	5h	OK	0.180897	6.35724	5.13516	4.39956	0.0005	0.0393853	coding	/
AUR62020494-RA	0h	5h	OK	134.016	57.0286	-1.23265	-2.51157	5e-05	0.00591181	coding	/
AUR62021174-RA	0h	5h	OK	4.41306	22.1579	2.32797	2.65774	5e-05	0.00591181	coding	/
AUR62021451-RA	0h	5h	OK	31.9685	15.0183	-1.08993	-2.37978	0.0001	0.0105361	coding	/
AUR62022459-RA	0h	5h	OK	3.93209	0	#NAME?	#NAME?	0.0003	0.0264282	coding	/
AUR62022680-RA	0h	5h	OK	11.1939	29.263	1.38637	2.65876	5e-05	0.00591181	coding	/
AUR62022857-RA	0h	5h	OK	7.06832	21.0011	1.57102	2.18914	0.0004	0.0328453	coding	/
AUR62023955-RA	0h	5h	OK	1.36584	12.3969	3.18212	5.36352	5e-05	0.00591181	coding	/
AUR62025200-RA	0h	5h	OK	0.650259	13.0306	4.32474	5.2469	5e-05	0.00591181	coding	/
AUR62025473-RA	0h	5h	OK	9.45461	2.30065	-2.03898	-2.77388	5e-05	0.00591181	coding	/
AUR62025872-RA	0h	5h	OK	13.0335	41.9711	1.68717	3.20566	5e-05	0.00591181	coding	/
AUR62026022-RA	0h	5h	OK	3.70165	8.33812	1.17155	2.47479	5e-05	0.00591181	coding	/
AUR62026272-RA	0h	5h	OK	18.1476	8.95511	-1.01899	-2.04631	0.0006	0.0447717	coding	/
AUR62026378-RA	0h	5h	OK	24.4274	11.1442	-1.1322	-2.08944	0.0006	0.0447717	noncoding	LncRNA
AUR62026631-RA	0h	5h	OK	5.31312	36.4124	2.7768	5.8623	5e-05	0.00591181	coding	/
AUR62026867-RA	0h	5h	OK	14.3827	43.8279	1.60751	3.55381	5e-05	0.00591181	coding	/
AUR62026935-RA	0h	5h	OK	0	6.19549	inf	#NAME?	5e-05	0.00591181	coding	/
AUR62026999-RA	0h	5h	OK	12.0144	5.7846	-1.05448	-2.06614	0.00045	0.0360335	coding	/
AUR62027099-RA	0h	5h	OK	1.64427	6.27831	1.93293	3.04486	0.0001	0.0105361	coding	/
AUR62027741-RA	0h	5h	OK	2.94346	10.4804	1.83211	3.02752	5e-05	0.00591181	coding	/
AUR62027742-RA	0h	5h	OK	14.9719	85.8021	2.51875	6.15886	5e-05	0.00591181	coding	/
AUR62027865-RA	0h	5h	OK	20.7816	7.60033	-1.45117	-2.29306	0.00045	0.0360335	coding	/
AUR62028298-RA	0h	5h	OK	100.456	208.603	1.05419	2.79726	5e-05	0.00591181	coding	/
AUR62029173-RA	0h	5h	OK	1.64815	9.34495	2.50334	3.17319	0.0001	0.0105361	coding	/
AUR62029281-RA	0h	5h	OK	70.0204	7.0477	-3.31255	-5.66873	5e-05	0.00591181	coding	/
AUR62029778-RA	0h	5h	OK	14.5563	50.9557	1.8076	3.85331	5e-05	0.00591181	coding	/
AUR62030388-RA	0h	5h	OK	1.72485	8.92324	2.37109	3.97906	5e-05	0.00591181	coding	/
AUR62030392-RA	0h	5h	OK	0.516506	2.66335	2.36638	3.88311	5e-05	0.00591181	coding	/
AUR62030476-RA	0h	5h	OK	15.5721	5.49271	-1.50337	-2.60843	5e-05	0.00591181	coding	/
AUR62030716-RA	0h	5h	OK	4.2549	10.8908	1.35592	2.15041	0.0006	0.0447717	coding	/
AUR62030899-RA	0h	5h	OK	0.779444	3.7779	2.27707	2.82164	5e-05	0.00591181	coding	/
AUR62031404-RA	0h	5h	OK	162.823	70.9137	-1.19917	-2.88931	5e-05	0.00591181	coding	/
AUR62031406-RA	0h	5h	OK	363.452	158.132	-1.20063	-3.00087	5e-05	0.00591181	coding	/
AUR62031580-RA	0h	5h	OK	9.97089	20.7809	1.05947	2.27691	0.0001	0.0105361	coding	/
AUR62031707-RA	0h	5h	OK	1.64636	4.24136	1.36525	2.13146	0.0004	0.0328453	coding	/
AUR62031750-RA	0h	5h	OK	2.15891	9.49878	2.13744	3.50898	5e-05	0.00591181	coding	/
AUR62031949-RA	0h	5h	OK	8.09437	18.2284	1.17119	2.28272	0.00015	0.0146848	coding	/
AUR62032258-RA	0h	5h	OK	7.50576	18.6742	1.31498	2.83047	5e-05	0.00591181	coding	/
AUR62032655-RA	0h	5h	OK	18.5632	45.9477	1.30755	3.10669	5e-05	0.00591181	coding	/
AUR62033235-RA	0h	5h	OK	10.9483	4.68607	-1.22426	-2.69814	5e-05	0.00591181	coding	/
AUR62033806-RA	0h	5h	OK	1.54023	8.17891	2.40876	3.7926	5e-05	0.00591181	coding	/
AUR62033811-RA	0h	5h	OK	4.50027	12.6348	1.48932	3.02851	5e-05	0.00591181	coding	/
AUR62033938-RA	0h	5h	OK	3.76895	10.5909	1.49059	3.01317	5e-05	0.00591181	coding	/
AUR62033939-RA	0h	5h	OK	18.8747	7.12896	-1.40469	-2.69934	5e-05	0.00591181	coding	/
AUR62034299-RA	0h	5h	OK	17.1438	8.31248	-1.04434	-2.0681	0.00045	0.0360335	coding	/
AUR62034513-RA	0h	5h	OK	0.466358	2.7948	2.58324	3.36584	5e-05	0.00591181	coding	/
AUR62034888-RA	0h	5h	OK	11.6647	25.9934	1.15599	2.49418	0.0001	0.0105361	coding	/
AUR62034966-RA	0h	5h	OK	3.48899	8.8425	1.34164	2.55495	0.0001	0.0105361	coding	/
AUR62035260-RA	0h	5h	OK	16.6815	7.45287	-1.16238	-2.00209	0.0006	0.0447717	coding	/
AUR62035739-RA	0h	5h	OK	4.52345	1.68333	-1.4261	-2.21476	0.0006	0.0447717	coding	/
AUR62035973-RA	0h	5h	OK	17.5295	8.12303	-1.10969	-2.6053	5e-05	0.00591181	coding	/
AUR62036206-RA	0h	5h	OK	52.5562	20.2329	-1.37716	-3.09479	5e-05	0.00591181	coding	/
AUR62037248-RA	0h	5h	OK	1.62766	6.77429	2.05727	3.52339	5e-05	0.00591181	coding	/
AUR62039431-RA	0h	5h	OK	2.91976	12.3144	2.07643	3.65492	5e-05	0.00591181	coding	/
AUR62039610-RA	0h	5h	OK	46.2725	21.0268	-1.13793	-2.79033	5e-05	0.00591181	coding	/
AUR62039948-RA	0h	5h	OK	302.441	137.301	-1.13931	-2.74232	5e-05	0.00591181	noncoding	LncRNA
AUR62040103-RA	0h	5h	OK	6.59711	23.4435	1.82928	2.21456	0.0002	0.0190967	coding	/
AUR62040578-RA	0h	5h	OK	1.93485	8.74236	2.1758	3.10062	5e-05	0.00591181	coding	/
AUR62040660-RA	0h	5h	OK	1.93049	9.41885	2.28658	4.04186	5e-05	0.00591181	coding	/
AUR62040699-RA	0h	5h	OK	24.9913	83.0731	1.73295	4.53181	5e-05	0.00591181	coding	/
AUR62041960-RA	0h	5h	OK	2.61271	6.04153	1.20937	2.27117	0.00015	0.0146848	coding	/
AUR62042086-RA	0h	5h	OK	10.4545	24.7001	1.24039	2.88907	5e-05	0.00591181	coding	/
AUR62042330-RA	0h	5h	OK	40.2059	19.4662	-1.04644	-2.38038	5e-05	0.00591181	coding	/
AUR62042339-RA	0h	5h	OK	6.85486	1.11859	-2.61545	-5.50811	5e-05	0.00591181	noncoding	LncRNA
AUR62042396-RA	0h	5h	OK	17.6884	8.05704	-1.13448	-2.19193	0.0003	0.0264282	coding	/
AUR62042931-RA	0h	5h	OK	0.426709	2.11634	2.31025	2.461	0.00065	0.0476453	coding	/
AUR62042941-RA	0h	5h	OK	3.64129	20.2889	2.47817	3.2937	5e-05	0.00591181	coding	/
AUR62043172-RA	0h	5h	OK	0.724879	3.4876	2.26642	2.5231	0.00045	0.0360335	coding	/
AUR62044332-RA	0h	5h	OK	8.18829	30.5661	1.9003	3.22107	5e-05	0.00591181	coding	/
MSTRG.101599.1	0h	5h	OK	0	3.03156	inf	#NAME?	5e-05	0.00591181	noncoding	LncRNA
MSTRG.102094.1	0h	5h	OK	0	2.30516	inf	#NAME?	5e-05	0.00591181	noncoding	LncRNA
MSTRG.102145.1	0h	5h	OK	0.946705	6.41976	2.76153	3.70857	5e-05	0.00591181	coding	/
MSTRG.102918.1	0h	5h	OK	19.0811	60.4595	1.66382	3.63506	5e-05	0.00591181	noncoding	LncRNA
MSTRG.10319.3	0h	5h	OK	0.752992	6.31076	3.06711	3.47253	5e-05	0.00591181	coding	/
MSTRG.103615.1	0h	5h	OK	4.12388	11.9327	1.53284	2.74188	5e-05	0.00591181	noncoding	LncRNA
MSTRG.103823.1	0h	5h	OK	1.31898	11.133	3.07735	4.76849	5e-05	0.00591181	coding	/
MSTRG.104197.1	0h	5h	OK	26.7958	67.566	1.33429	3.29121	5e-05	0.00591181	coding	/
MSTRG.104204.1	0h	5h	OK	1.9498	26.1439	3.74507	7.05983	5e-05	0.00591181	noncoding	LncRNA
MSTRG.104485.1	0h	5h	OK	10.7692	28.5195	1.40503	2.82968	5e-05	0.00591181	coding	/
MSTRG.104538.1	0h	5h	OK	0.410131	12.9882	4.98497	5.01709	5e-05	0.00591181	coding	/
MSTRG.104851.1	0h	5h	OK	5.68857	27.3958	2.26781	3.65685	5e-05	0.00591181	coding	/
MSTRG.104897.1	0h	5h	OK	28.7637	83.5376	1.53818	3.74056	5e-05	0.00591181	noncoding	LncRNA
MSTRG.105200.1	0h	5h	OK	3.53041	21.7448	2.62276	4.35045	5e-05	0.00591181	noncoding	LncRNA
MSTRG.105218.1	0h	5h	OK	4.24007	17.3682	2.03429	4.08767	5e-05	0.00591181	coding	/
MSTRG.105486.2	0h	5h	OK	3.97656	19.6272	2.30326	4.76553	5e-05	0.00591181	coding	/
MSTRG.105796.1	0h	5h	OK	1.74805	4.45207	1.34873	2.09155	0.0006	0.0447717	coding	/
MSTRG.105971.1	0h	5h	OK	4.05356	8.2825	1.03088	2.05594	0.00065	0.0476453	coding	/
MSTRG.106273.1	0h	5h	OK	0.84435	4.29435	2.34653	2.90365	0.00025	0.022892	coding	/
MSTRG.106408.1	0h	5h	OK	106.49	46.8776	-1.18375	-2.36599	0.00025	0.022892	noncoding	LncRNA
MSTRG.106490.1	0h	5h	OK	0.521593	3.44738	2.72451	3.12655	0.00015	0.0146848	coding	/
MSTRG.107702.2	0h	5h	OK	11.6233	25.5878	1.13844	2.55397	5e-05	0.00591181	coding	/
MSTRG.107892.1	0h	5h	OK	9.22988	20.8969	1.17891	2.7007	5e-05	0.00591181	coding	/
MSTRG.108250.1	0h	5h	OK	10.4609	32.848	1.6508	3.39402	5e-05	0.00591181	coding	/
MSTRG.108318.1	0h	5h	OK	2.21616	6.16642	1.47637	2.28259	0.00025	0.022892	noncoding	LncRNA
MSTRG.108324.1	0h	5h	OK	0	10.4404	inf	#NAME?	0.0001	0.0105361	noncoding	LncRNA
MSTRG.108326.1	0h	5h	OK	5.48715	115.795	4.39937	7.85177	5e-05	0.00591181	noncoding	LncRNA
MSTRG.108800.1	0h	5h	OK	1.14585	7.79335	2.76583	2.75478	0.0003	0.0264282	noncoding	LncRNA
MSTRG.10905.3	0h	5h	OK	5.03326	11.0317	1.13209	2.15183	0.0003	0.0264282	coding	/
MSTRG.109469.1	0h	5h	OK	3.40051	7.26844	1.0959	2.14225	0.0003	0.0264282	noncoding	LncRNA
MSTRG.109933.1	0h	5h	OK	6.74901	24.3551	1.85147	3.89287	5e-05	0.00591181	noncoding	LncRNA
MSTRG.110037.1	0h	5h	OK	12.0585	4.73635	-1.3482	-2.40702	5e-05	0.00591181	noncoding	LncRNA
MSTRG.110046.1	0h	5h	OK	17.304	7.34282	-1.2367	-2.45272	0.0001	0.0105361	coding	/
MSTRG.110201.4	0h	5h	OK	2.91522	6.97293	1.25816	2.13496	0.0005	0.0393853	coding	/
MSTRG.110218.1	0h	5h	OK	20.3748	9.47532	-1.10454	-2.32667	0.00015	0.0146848	noncoding	LncRNA
MSTRG.111739.1	0h	5h	OK	24.9024	107.588	2.11116	5.26639	5e-05	0.00591181	noncoding	LncRNA
MSTRG.112969.1	0h	5h	OK	10.3845	22.0131	1.08394	2.2705	0.00015	0.0146848	noncoding	LncRNA
MSTRG.113509.1	0h	5h	OK	6.25565	17.0991	1.45069	2.41633	0.0004	0.0328453	noncoding	LncRNA
MSTRG.114655.1	0h	5h	OK	26.7785	100.069	1.90184	4.63944	5e-05	0.00591181	noncoding	LncRNA
MSTRG.114744.1	0h	5h	OK	26.5917	57.0665	1.10167	2.82066	5e-05	0.00591181	noncoding	LncRNA
MSTRG.114755.1	0h	5h	OK	2.84796	25.2528	3.14844	4.33637	5e-05	0.00591181	noncoding	LncRNA
MSTRG.115143.1	0h	5h	OK	0	2.73853	inf	#NAME?	5e-05	0.00591181	noncoding	LncRNA
MSTRG.115216.2	0h	5h	OK	3.59243	18.0756	2.33101	4.04579	5e-05	0.00591181	coding	/
MSTRG.115361.1	0h	5h	OK	14.9571	33.3811	1.1582	2.51668	5e-05	0.00591181	noncoding	LncRNA
MSTRG.116434.1	0h	5h	OK	3.13199	1.3027	-1.26557	-2.22303	0.0004	0.0328453	noncoding	LncRNA
MSTRG.117006.1	0h	5h	OK	6.96185	22.649	1.7019	3.18941	5e-05	0.00591181	noncoding	LncRNA
MSTRG.117582.1	0h	5h	OK	29.4652	63.029	1.097	2.61378	5e-05	0.00591181	noncoding	LncRNA
MSTRG.11887.1	0h	5h	OK	1.50424	5.89803	1.9712	2.82314	0.0001	0.0105361	coding	/
MSTRG.120488.5	0h	5h	OK	0	2.85987	inf	#NAME?	0.00035	0.0298807	coding	/
MSTRG.122863.1	0h	5h	OK	5.23462	1.94371	-1.42927	-2.51748	0.00025	0.022892	coding	/
MSTRG.123184.1	0h	5h	OK	129.953	59.1927	-1.13449	-2.86015	5e-05	0.00591181	noncoding	LncRNA
MSTRG.123232.1	0h	5h	OK	2.62132	6.90623	1.3976	2.11973	0.00055	0.0417928	noncoding	LncRNA
MSTRG.123933.2	0h	5h	OK	0.403241	1.30889	1.69863	2.38848	0.00055	0.0417928	coding	/
MSTRG.124267.1	0h	5h	OK	0.756643	3.20513	2.0827	2.6623	5e-05	0.00591181	noncoding	LncRNA
MSTRG.125300.1	0h	5h	OK	0	2.13037	inf	#NAME?	5e-05	0.00591181	noncoding	LncRNA
MSTRG.125386.1	0h	5h	OK	10.4291	4.85165	-1.10407	-2.304	0.0002	0.0190967	noncoding	LncRNA
MSTRG.125496.1	0h	5h	OK	1.88607	6.20559	1.71818	2.42306	5e-05	0.00591181	noncoding	LncRNA
MSTRG.125557.1	0h	5h	OK	24.1921	104.758	2.11445	4.73746	5e-05	0.00591181	coding	/
MSTRG.126034.1	0h	5h	OK	6.16298	14.8421	1.268	2.71138	5e-05	0.00591181	noncoding	LncRNA
MSTRG.126262.1	0h	5h	OK	0.287203	2.30636	3.00547	3.00607	0.00015	0.0146848	coding	/
MSTRG.126797.1	0h	5h	OK	0	1.32524	inf	#NAME?	5e-05	0.00591181	coding	/
MSTRG.128980.1	0h	5h	OK	1.1508	12.7632	3.47128	6.2823	5e-05	0.00591181	noncoding	LncRNA
MSTRG.130691.2	0h	5h	OK	45.2543	19.1024	-1.2443	-2.82345	5e-05	0.00591181	coding	/
MSTRG.130874.1	0h	5h	OK	2.64499	12.6523	2.25806	4.78243	5e-05	0.00591181	coding	/
MSTRG.131099.1	0h	5h	OK	3.73767	18.1338	2.27847	3.67603	5e-05	0.00591181	noncoding	LncRNA
MSTRG.131492.1	0h	5h	OK	4.46068	25.0925	2.49192	5.33069	5e-05	0.00591181	coding	/
MSTRG.131663.1	0h	5h	OK	0.679797	1.81033	1.41307	2.31339	0.0001	0.0105361	noncoding	LncRNA
MSTRG.131709.1	0h	5h	OK	6.53984	22.5366	1.78494	3.30431	5e-05	0.00591181	noncoding	LncRNA
MSTRG.131776.2	0h	5h	OK	2.28511	11.762	2.3638	3.90141	5e-05	0.00591181	coding	/
MSTRG.132041.1	0h	5h	OK	46.2492	22.7454	-1.02386	-2.14772	0.0003	0.0264282	coding	/
MSTRG.132081.1	0h	5h	OK	0	1.05863	inf	#NAME?	5e-05	0.00591181	noncoding	LncRNA
MSTRG.132224.1	0h	5h	OK	2.26839	12.6087	2.47467	4.68007	5e-05	0.00591181	noncoding	LncRNA
MSTRG.132503.1	0h	5h	OK	32.5112	15.0255	-1.11353	-2.23676	0.0001	0.0105361	noncoding	LncRNA
MSTRG.133311.1	0h	5h	OK	5.40953	14.4022	1.41271	2.7826	5e-05	0.00591181	noncoding	LncRNA
MSTRG.133402.1	0h	5h	OK	1.26005	6.75079	2.42157	4.08289	5e-05	0.00591181	coding	/
MSTRG.13373.1	0h	5h	OK	5.35212	2.49966	-1.09838	-2.45034	5e-05	0.00591181	noncoding	LncRNA
MSTRG.134827.1	0h	5h	OK	1.7734	5.5614	1.64893	2.40667	0.00015	0.0146848	coding	/
MSTRG.135167.1	0h	5h	OK	3.99822	19.3309	2.27348	3.42985	5e-05	0.00591181	noncoding	LncRNA
MSTRG.135776.1	0h	5h	OK	3.59796	12.848	1.8363	2.17927	0.00055	0.0417928	noncoding	LncRNA
MSTRG.135872.1	0h	5h	OK	2.56503	13.276	2.37177	3.49418	5e-05	0.00591181	noncoding	LncRNA
MSTRG.138287.1	0h	5h	OK	4.67157	0.933898	-2.32257	-2.85085	5e-05	0.00591181	coding	/
MSTRG.140408.1	0h	5h	OK	1.93166	0.474363	-2.02577	-2.58072	0.0004	0.0328453	noncoding	LncRNA
MSTRG.14047.1	0h	5h	OK	2.74505	15.7587	2.52125	4.24584	5e-05	0.00591181	noncoding	LncRNA
MSTRG.141636.1	0h	5h	OK	20.4087	8.76325	-1.21965	-2.53709	5e-05	0.00591181	noncoding	LncRNA
MSTRG.141831.1	0h	5h	OK	78.7452	39.1319	-1.00885	-2.2265	0.0004	0.0328453	noncoding	LncRNA
MSTRG.141843.1	0h	5h	OK	249.965	124.29	-1.00801	-2.35548	0.0001	0.0105361	noncoding	LncRNA
MSTRG.142116.1	0h	5h	OK	3.75544	10.4622	1.47813	3.17801	5e-05	0.00591181	noncoding	LncRNA
MSTRG.142185.1	0h	5h	OK	14.5152	31.6733	1.1257	2.72834	5e-05	0.00591181	coding	/
MSTRG.142409.1	0h	5h	OK	1.88094	7.65513	2.02497	2.9754	5e-05	0.00591181	noncoding	LncRNA
MSTRG.142560.1	0h	5h	OK	3.43734	8.57439	1.31874	3.09931	5e-05	0.00591181	coding	/
MSTRG.143020.1	0h	5h	OK	6.08948	15.3187	1.3309	2.49805	5e-05	0.00591181	noncoding	LncRNA
MSTRG.143269.2	0h	5h	OK	1.17463	8.59578	2.87143	4.99863	5e-05	0.00591181	coding	/
MSTRG.14332.1	0h	5h	OK	30.1517	7.86674	-1.9384	-2.63375	0.00045	0.0360335	noncoding	LncRNA
MSTRG.143957.1	0h	5h	OK	7.08457	44.9934	2.66696	4.82932	5e-05	0.00591181	coding	/
MSTRG.144316.1	0h	5h	OK	0.519117	4.81548	3.21355	3.24269	0.00025	0.022892	coding	/
MSTRG.144460.1	0h	5h	OK	3.54938	7.6142	1.10112	2.04692	0.0004	0.0328453	noncoding	LncRNA
MSTRG.144538.1	0h	5h	OK	0.817842	4.23017	2.37082	2.9517	5e-05	0.00591181	coding	/
MSTRG.145086.1	0h	5h	OK	0	4.11134	inf	#NAME?	5e-05	0.00591181	noncoding	LncRNA
MSTRG.146155.1	0h	5h	OK	22.6079	10.9576	-1.04489	-2.51608	5e-05	0.00591181	coding	/
MSTRG.146175.2	0h	5h	OK	5.03579	11.3382	1.17091	2.29313	0.0001	0.0105361	coding	/
MSTRG.146577.1	0h	5h	OK	4.25176	1.25848	-1.75638	-2.94305	5e-05	0.00591181	coding	/
MSTRG.146592.2	0h	5h	OK	3.7866	9.53755	1.33271	2.92537	5e-05	0.00591181	coding	/
MSTRG.146659.1	0h	5h	OK	1.44015	9.45829	2.71536	5.72092	5e-05	0.00591181	coding	/
MSTRG.146789.1	0h	5h	OK	7.13109	2.58198	-1.46565	-3.24075	5e-05	0.00591181	noncoding	LncRNA
MSTRG.147206.1	0h	5h	OK	4.17622	9.19735	1.13902	2.18019	0.00035	0.0298807	coding	/
MSTRG.147450.1	0h	5h	OK	3.73745	29.7158	2.9911	5.09318	5e-05	0.00591181	noncoding	LncRNA
MSTRG.147459.1	0h	5h	OK	4.98709	16.0509	1.68638	2.90109	5e-05	0.00591181	noncoding	LncRNA
MSTRG.147637.2	0h	5h	OK	7.10538	1.61422	-2.13808	-2.81399	0.00055	0.0417928	noncoding	LncRNA
MSTRG.147831.1	0h	5h	OK	0	2.69164	inf	#NAME?	5e-05	0.00591181	noncoding	LncRNA
MSTRG.147968.1	0h	5h	OK	4.25542	13.4615	1.66147	3.00111	5e-05	0.00591181	noncoding	LncRNA
MSTRG.1482.1	0h	5h	OK	1.1441	2.91769	1.35061	2.27963	0.00015	0.0146848	coding	/
MSTRG.150780.1	0h	5h	OK	9.93593	4.14641	-1.26079	-2.40703	0.0004	0.0328453	coding	/
MSTRG.150956.1	0h	5h	OK	2.78487	14.7328	2.40335	3.99179	5e-05	0.00591181	noncoding	LncRNA
MSTRG.151624.2	0h	5h	OK	17.9743	44.0706	1.29388	2.86929	5e-05	0.00591181	coding	/
MSTRG.151718.1	0h	5h	OK	32.0754	84.3847	1.39552	3.19141	5e-05	0.00591181	coding	/
MSTRG.151822.1	0h	5h	OK	7.86564	20.1136	1.35453	2.4591	5e-05	0.00591181	noncoding	LncRNA
MSTRG.151970.1	0h	5h	OK	0	1.59549	inf	#NAME?	5e-05	0.00591181	noncoding	LncRNA
MSTRG.151996.1	0h	5h	OK	13.1602	1.5167	-3.11717	-4.14177	5e-05	0.00591181	coding	/
MSTRG.15263.1	0h	5h	OK	2.89991	20.4418	2.81744	5.2372	5e-05	0.00591181	noncoding	LncRNA
MSTRG.15271.1	0h	5h	OK	10.6921	26.0894	1.28692	2.46342	0.00015	0.0146848	noncoding	LncRNA
MSTRG.1528.4	0h	5h	OK	4.17589	29.4995	2.82054	4.39506	5e-05	0.00591181	coding	/
MSTRG.153716.1	0h	5h	OK	3.57159	10.4504	1.54892	3.33241	5e-05	0.00591181	noncoding	LncRNA
MSTRG.154238.1	0h	5h	OK	2.5722	0.702501	-1.87243	-3.36697	5e-05	0.00591181	noncoding	LncRNA
MSTRG.154633.1	0h	5h	OK	0	1.80235	inf	#NAME?	5e-05	0.00591181	noncoding	LncRNA
MSTRG.156337.1	0h	5h	OK	0	2.43331	inf	#NAME?	5e-05	0.00591181	noncoding	LncRNA
MSTRG.15648.1	0h	5h	OK	34.7453	103.255	1.57133	4.1008	5e-05	0.00591181	coding	/
MSTRG.157138.1	0h	5h	OK	0.897071	0	#NAME?	#NAME?	5e-05	0.00591181	noncoding	LncRNA
MSTRG.1573.3	0h	5h	OK	4.44927	1.63182	-1.44709	-2.65384	0.0001	0.0105361	coding	/
MSTRG.1577.1	0h	5h	OK	22.0659	10.2816	-1.10175	-2.27703	0.00015	0.0146848	coding	/
MSTRG.161043.1	0h	5h	OK	1.2581	8.21491	2.707	4.03545	5e-05	0.00591181	noncoding	LncRNA
MSTRG.161927.1	0h	5h	OK	2.1057	21.4687	3.34986	4.50618	5e-05	0.00591181	noncoding	LncRNA
MSTRG.161933.1	0h	5h	OK	3.64597	8.57228	1.23337	2.09627	0.00065	0.0476453	noncoding	LncRNA
MSTRG.161936.1	0h	5h	OK	3.38196	18.4532	2.44794	4.20571	5e-05	0.00591181	noncoding	LncRNA
MSTRG.162107.1	0h	5h	OK	0.326487	11.4723	5.13498	4.77627	5e-05	0.00591181	noncoding	LncRNA
MSTRG.162177.1	0h	5h	OK	16.4082	2.26129	-2.8592	-3.16409	0.00015	0.0146848	noncoding	LncRNA
MSTRG.162182.1	0h	5h	OK	2.48027	5.69146	1.1983	2.24066	0.0003	0.0264282	coding	/
MSTRG.162622.1	0h	5h	OK	5.71919	40.0658	2.80849	6.08805	5e-05	0.00591181	coding	/
MSTRG.162662.1	0h	5h	OK	11.9384	165.846	3.79616	8.82043	5e-05	0.00591181	noncoding	LncRNA
MSTRG.162892.1	0h	5h	OK	0.811291	8.70076	3.42285	4.28015	5e-05	0.00591181	coding	/
MSTRG.163017.1	0h	5h	OK	12.4403	52.94	2.08934	3.31233	5e-05	0.00591181	coding	/
MSTRG.163389.1	0h	5h	OK	9.57206	37.9082	1.98561	3.60997	5e-05	0.00591181	noncoding	LncRNA
MSTRG.163433.1	0h	5h	OK	78.3584	36.8837	-1.08711	-2.45375	5e-05	0.00591181	coding	/
MSTRG.163798.1	0h	5h	OK	6.72507	18.5016	1.46003	3.08717	5e-05	0.00591181	noncoding	LncRNA
MSTRG.163864.1	0h	5h	OK	8.73375	21.1808	1.27809	2.67978	5e-05	0.00591181	noncoding	LncRNA
MSTRG.163943.1	0h	5h	OK	1.54657	6.70379	2.11591	2.82403	5e-05	0.00591181	coding	/
MSTRG.164128.1	0h	5h	OK	863.583	400.971	-1.10684	-2.33634	5e-05	0.00591181	coding	/
MSTRG.166474.1	0h	5h	OK	3.72577	13.2818	1.83385	2.42264	0.0002	0.0190967	noncoding	LncRNA
MSTRG.166523.1	0h	5h	OK	32.8769	104.425	1.66731	3.52175	5e-05	0.00591181	noncoding	LncRNA
MSTRG.167382.1	0h	5h	OK	2.44958	0.912916	-1.42398	-2.53964	0.00015	0.0146848	coding	/
MSTRG.16771.1	0h	5h	OK	11.5018	34.9541	1.6036	3.87988	5e-05	0.00591181	noncoding	LncRNA
MSTRG.167898.1	0h	5h	OK	3.24411	0	#NAME?	#NAME?	5e-05	0.00591181	noncoding	LncRNA
MSTRG.17013.1	0h	5h	OK	13.7125	6.7457	-1.02345	-2.2563	0.00015	0.0146848	coding	/
MSTRG.170242.1	0h	5h	OK	0.676371	4.63518	2.77674	3.43541	5e-05	0.00591181	coding	/
MSTRG.170247.1	0h	5h	OK	0	1.52218	inf	#NAME?	5e-05	0.00591181	noncoding	LncRNA
MSTRG.17043.1	0h	5h	OK	10.8891	30.9556	1.50732	2.45111	0.0001	0.0105361	coding	/
MSTRG.170807.1	0h	5h	OK	10.4723	4.31308	-1.27979	-2.34127	0.0002	0.0190967	coding	/
MSTRG.170949.1	0h	5h	OK	25.9413	68.8198	1.40757	3.29872	5e-05	0.00591181	coding	/
MSTRG.171080.1	0h	5h	OK	12.1003	54.0294	2.1587	5.46863	5e-05	0.00591181	coding	/
MSTRG.171860.1	0h	5h	OK	14.4147	33.3384	1.20964	2.33337	0.0001	0.0105361	noncoding	LncRNA
MSTRG.172213.1	0h	5h	OK	5.60943	38.8858	2.79332	4.61687	5e-05	0.00591181	coding	/
MSTRG.172931.1	0h	5h	OK	2.39521	15.575	2.70101	2.46909	0.0001	0.0105361	noncoding	LncRNA
MSTRG.173367.1	0h	5h	OK	15.1552	44.3229	1.54824	3.67129	5e-05	0.00591181	coding	/
MSTRG.173899.1	0h	5h	OK	4.76613	12.7041	1.41441	3.02229	5e-05	0.00591181	coding	/
MSTRG.173919.1	0h	5h	OK	2.01796	5.18221	1.36067	2.26647	0.0004	0.0328453	coding	/
MSTRG.174219.1	0h	5h	OK	11.6087	5.49306	-1.07952	-2.13658	0.00055	0.0417928	noncoding	LncRNA
MSTRG.174394.1	0h	5h	OK	23.4199	49.5329	1.08065	2.4353	5e-05	0.00591181	noncoding	LncRNA
MSTRG.17479.1	0h	5h	OK	0	2.65949	inf	#NAME?	5e-05	0.00591181	noncoding	LncRNA
MSTRG.175404.1	0h	5h	OK	1.00975	16.3378	4.01615	5.49076	5e-05	0.00591181	coding	/
MSTRG.175471.1	0h	5h	OK	74.1189	36.5578	-1.01966	-2.34873	0.00025	0.022892	coding	/
MSTRG.175828.1	0h	5h	OK	4.85556	36.6059	2.91437	5.95806	5e-05	0.00591181	coding	/
MSTRG.176098.1	0h	5h	OK	4.52064	0.445008	-3.34463	-3.88288	5e-05	0.00591181	noncoding	LncRNA
MSTRG.176298.1	0h	5h	OK	3.19568	10.5365	1.7212	2.60951	0.0001	0.0105361	noncoding	LncRNA
MSTRG.176793.1	0h	5h	OK	11.1319	0	#NAME?	#NAME?	0.0004	0.0328453	noncoding	LncRNA
MSTRG.17680.1	0h	5h	OK	4.29241	1.11841	-1.94033	-2.55503	0.00015	0.0146848	coding	/
MSTRG.176887.1	0h	5h	OK	0.514139	6.30188	3.61555	4.05048	5e-05	0.00591181	noncoding	LncRNA
MSTRG.177978.1	0h	5h	OK	3.49674	8.28733	1.2449	2.25867	0.0004	0.0328453	noncoding	LncRNA
MSTRG.178202.1	0h	5h	OK	3.47983	18.3192	2.39627	3.97422	5e-05	0.00591181	noncoding	LncRNA
MSTRG.178575.1	0h	5h	OK	2.64505	12.2674	2.21346	3.25291	5e-05	0.00591181	coding	/
MSTRG.178720.1	0h	5h	OK	5.06434	13.6502	1.43047	2.44637	5e-05	0.00591181	noncoding	LncRNA
MSTRG.178726.1	0h	5h	OK	6.77596	26.8908	1.98861	3.71251	5e-05	0.00591181	noncoding	LncRNA
MSTRG.178736.1	0h	5h	OK	2.38522	12.3017	2.36666	3.05412	5e-05	0.00591181	noncoding	LncRNA
MSTRG.178784.1	0h	5h	OK	10.4145	22.653	1.1211	2.46204	5e-05	0.00591181	noncoding	LncRNA
MSTRG.178851.1	0h	5h	OK	1.17917	5.7653	2.28962	3.44735	5e-05	0.00591181	coding	/
MSTRG.179414.1	0h	5h	OK	1.78756	6.59361	1.88308	2.66068	5e-05	0.00591181	coding	/
MSTRG.179417.1	0h	5h	OK	0.83101	13.0437	3.97234	4.57437	5e-05	0.00591181	coding	/
MSTRG.18003.1	0h	5h	OK	1.05428	5.40918	2.35915	3.50051	5e-05	0.00591181	coding	/
MSTRG.180041.1	0h	5h	OK	68.7343	33.3972	-1.04131	-2.45665	5e-05	0.00591181	coding	/
MSTRG.180119.1	0h	5h	OK	4.10182	9.92522	1.27484	2.20295	0.0002	0.0190967	coding	/
MSTRG.180297.1	0h	5h	OK	3.99619	12.8585	1.68603	2.81845	5e-05	0.00591181	noncoding	LncRNA
MSTRG.180464.1	0h	5h	OK	6.63212	23.4268	1.82062	3.74847	5e-05	0.00591181	noncoding	LncRNA
MSTRG.181060.1	0h	5h	OK	2.90231	6.42234	1.1459	2.14281	0.00055	0.0417928	coding	/
MSTRG.181082.1	0h	5h	OK	4.09198	9.9054	1.27542	2.13725	0.0004	0.0328453	coding	/
MSTRG.18109.1	0h	5h	OK	10.1485	122.559	3.59413	7.87619	5e-05	0.00591181	noncoding	LncRNA
MSTRG.181130.1	0h	5h	OK	10.5823	64.8139	2.61465	4.83678	5e-05	0.00591181	noncoding	LncRNA
MSTRG.18263.1	0h	5h	OK	1.46834	39.7595	4.75904	7.62019	5e-05	0.00591181	coding	/
MSTRG.1925.1	0h	5h	OK	2.74221	7.90952	1.52825	2.84448	5e-05	0.00591181	noncoding	LncRNA
MSTRG.19388.1	0h	5h	OK	9.15168	20.5628	1.16793	2.22988	0.00025	0.022892	noncoding	LncRNA
MSTRG.19393.1	0h	5h	OK	4.09064	13.6687	1.74048	2.53155	0.00015	0.0146848	noncoding	LncRNA
MSTRG.19447.1	0h	5h	OK	2.47028	7.56868	1.61537	2.95818	5e-05	0.00591181	coding	/
MSTRG.20272.6	0h	5h	OK	0.904915	6.7084	2.89012	2.66352	0.00055	0.0417928	coding	/
MSTRG.2194.5	0h	5h	OK	8.61054	0.78803	-3.44978	-3.32941	0.00035	0.0298807	noncoding	LncRNA
MSTRG.23903.4	0h	5h	OK	21.5109	7.91594	-1.44223	-2.23192	0.0005	0.0393853	coding	/
MSTRG.24729.1	0h	5h	OK	4.18208	9.8523	1.23624	2.20502	0.00035	0.0298807	coding	/
MSTRG.25305.1	0h	5h	OK	0	4.66151	inf	#NAME?	0.0002	0.0190967	noncoding	LncRNA
MSTRG.25602.1	0h	5h	OK	0.588059	7.99488	3.76504	2.86201	0.00025	0.022892	coding	/
MSTRG.25802.1	0h	5h	OK	2.85369	0.425651	-2.74509	-3.4681	5e-05	0.00591181	noncoding	LncRNA
MSTRG.25917.1	0h	5h	OK	1.90662	4.55408	1.25614	2.26398	0.00025	0.022892	coding	/
MSTRG.26700.1	0h	5h	OK	0	2.69919	inf	#NAME?	5e-05	0.00591181	noncoding	LncRNA
MSTRG.27082.1	0h	5h	OK	6.18492	13.8706	1.1652	2.03381	0.00065	0.0476453	noncoding	LncRNA
MSTRG.27136.1	0h	5h	OK	2.62192	14.8709	2.50379	3.52475	5e-05	0.00591181	noncoding	LncRNA
MSTRG.27176.1	0h	5h	OK	27.9239	62.4038	1.16013	2.90795	5e-05	0.00591181	noncoding	LncRNA
MSTRG.27809.1	0h	5h	OK	54.6993	24.0959	-1.18274	-2.92965	5e-05	0.00591181	coding	/
MSTRG.29365.1	0h	5h	OK	14.011	4.73904	-1.56389	-2.90615	0.0001	0.0105361	noncoding	LncRNA
MSTRG.30866.1	0h	5h	OK	21.401	68.0064	1.66799	4.08161	5e-05	0.00591181	coding	/
MSTRG.31171.1	0h	5h	OK	19.2526	9.38321	-1.0369	-2.21376	0.00015	0.0146848	coding	/
MSTRG.32177.1	0h	5h	OK	0.592295	1.99396	1.75125	2.34676	0.00025	0.022892	coding	/
MSTRG.32234.1	0h	5h	OK	99.8472	36.3012	-1.4597	-3.7657	5e-05	0.00591181	noncoding	LncRNA
MSTRG.33541.1	0h	5h	OK	2.33396	35.4322	3.92421	4.91727	5e-05	0.00591181	noncoding	LncRNA
MSTRG.33977.1	0h	5h	OK	0.630895	1.93922	1.62	2.45202	0.00015	0.0146848	coding	/
MSTRG.33993.2	0h	5h	OK	3.37753	12.3806	1.87404	3.9444	5e-05	0.00591181	coding	/
MSTRG.34086.1	0h	5h	OK	19.0827	38.7618	1.02237	2.5001	5e-05	0.00591181	coding	/
MSTRG.35078.1	0h	5h	OK	0.242761	2.66568	3.4569	3.39456	0.0002	0.0190967	noncoding	LncRNA
MSTRG.35866.1	0h	5h	OK	1.27105	60.756	5.57893	8.91784	5e-05	0.00591181	noncoding	LncRNA
MSTRG.35919.1	0h	5h	OK	2.74358	8.48425	1.62873	3.34831	5e-05	0.00591181	coding	/
MSTRG.37352.1	0h	5h	OK	4.14087	13.5529	1.71059	3.0418	5e-05	0.00591181	coding	/
MSTRG.37624.1	0h	5h	OK	8.25814	19.3309	1.22702	2.15328	0.00025	0.022892	noncoding	LncRNA
MSTRG.38519.1	0h	5h	OK	4.98457	10.417	1.0634	2.07464	0.0004	0.0328453	coding	/
MSTRG.38694.1	0h	5h	OK	6.03952	2.33808	-1.36911	-2.7387	5e-05	0.00591181	noncoding	LncRNA
MSTRG.38803.1	0h	5h	OK	17.1402	40.0509	1.22445	2.44651	0.00015	0.0146848	noncoding	LncRNA
MSTRG.39307.1	0h	5h	OK	2.53927	13.5118	2.41173	4.22622	5e-05	0.00591181	coding	/
MSTRG.39412.1	0h	5h	OK	0.757636	5.0545	2.73799	3.46361	5e-05	0.00591181	noncoding	LncRNA
MSTRG.4023.1	0h	5h	OK	9.46009	0	#NAME?	#NAME?	0.00055	0.0417928	noncoding	LncRNA
MSTRG.42254.1	0h	5h	OK	5.25922	13.1175	1.31857	2.46003	0.0001	0.0105361	noncoding	LncRNA
MSTRG.42934.1	0h	5h	OK	7.16951	37.9577	2.40444	4.97385	5e-05	0.00591181	noncoding	LncRNA
MSTRG.4339.1	0h	5h	OK	2.59493	5.51011	1.08639	2.0904	0.00055	0.0417928	coding	/
MSTRG.46739.1	0h	5h	OK	15.6719	7.22967	-1.11618	-2.76411	5e-05	0.00591181	noncoding	LncRNA
MSTRG.4695.1	0h	5h	OK	17.2152	40.1911	1.22319	2.83365	5e-05	0.00591181	noncoding	LncRNA
MSTRG.46990.1	0h	5h	OK	3.21414	12.5195	1.96167	3.12148	5e-05	0.00591181	coding	/
MSTRG.47061.1	0h	5h	OK	1.82602	6.53054	1.8385	3.41433	5e-05	0.00591181	coding	/
MSTRG.4716.2	0h	5h	OK	5.74628	11.8283	1.04154	2.20069	0.00015	0.0146848	noncoding	LncRNA
MSTRG.47227.1	0h	5h	OK	3.1335	9.27337	1.56532	3.3946	5e-05	0.00591181	coding	/
MSTRG.47733.1	0h	5h	OK	7.34201	155.674	4.40621	9.18892	5e-05	0.00591181	noncoding	LncRNA
MSTRG.47736.1	0h	5h	OK	14.0067	55.536	1.9873	4.30053	5e-05	0.00591181	noncoding	LncRNA
MSTRG.47739.1	0h	5h	OK	19.3397	167.895	3.11793	7.52086	5e-05	0.00591181	noncoding	LncRNA
MSTRG.47742.1	0h	5h	OK	9.79984	36.439	1.89465	4.0365	5e-05	0.00591181	noncoding	LncRNA
MSTRG.47786.1	0h	5h	OK	8.9437	60.2904	2.75298	5.6043	5e-05	0.00591181	coding	/
MSTRG.48404.1	0h	5h	OK	34.3157	89.3518	1.38063	3.34955	5e-05	0.00591181	coding	/
MSTRG.48418.1	0h	5h	OK	0	2.79163	inf	#NAME?	5e-05	0.00591181	noncoding	LncRNA
MSTRG.48537.1	0h	5h	OK	1.05767	3.83473	1.85824	2.66094	0.00015	0.0146848	noncoding	LncRNA
MSTRG.49012.1	0h	5h	OK	14.9578	62.101	2.05372	3.94217	5e-05	0.00591181	noncoding	LncRNA
MSTRG.49329.2	0h	5h	OK	7.22109	23.8035	1.72088	2.89581	5e-05	0.00591181	noncoding	LncRNA
MSTRG.49336.1	0h	5h	OK	8.7012	18.5758	1.09414	2.18964	0.00015	0.0146848	coding	/
MSTRG.49494.1	0h	5h	OK	15.699	152.903	3.28387	8.36576	5e-05	0.00591181	coding	/
MSTRG.49586.1	0h	5h	OK	17.491	57.2455	1.71055	4.50192	5e-05	0.00591181	noncoding	LncRNA
MSTRG.49859.1	0h	5h	OK	2.68645	7.56007	1.4927	2.34729	0.0004	0.0328453	noncoding	LncRNA
MSTRG.49930.1	0h	5h	OK	30.5126	9.07071	-1.75012	-3.07948	5e-05	0.00591181	noncoding	LncRNA
MSTRG.50169.1	0h	5h	OK	4.98643	27.3368	2.45476	4.61955	5e-05	0.00591181	noncoding	LncRNA
MSTRG.50201.2	0h	5h	OK	0.668098	2.35134	1.81535	2.32839	0.0003	0.0264282	coding	/
MSTRG.50386.1	0h	5h	OK	3.49073	10.1998	1.54694	2.38933	0.00045	0.0360335	noncoding	LncRNA
MSTRG.50392.1	0h	5h	OK	8.56202	18.9837	1.14874	2.16841	0.00025	0.022892	coding	/
MSTRG.50478.1	0h	5h	OK	35.8885	12.2076	-1.55574	-2.87513	5e-05	0.00591181	noncoding	LncRNA
MSTRG.50550.1	0h	5h	OK	4.8531	48.6896	3.32664	7.66679	5e-05	0.00591181	coding	/
MSTRG.50658.1	0h	5h	OK	8.07163	18.1151	1.16626	2.2443	0.0001	0.0105361	noncoding	LncRNA
MSTRG.51033.1	0h	5h	OK	1.75874	4.37388	1.31437	2.40221	0.0001	0.0105361	coding	/
MSTRG.51109.2	0h	5h	OK	56.8784	22.5767	-1.33305	-2.07998	0.0004	0.0328453	noncoding	LncRNA
MSTRG.51772.1	0h	5h	OK	2.99452	8.46794	1.49969	2.23573	0.0003	0.0264282	noncoding	LncRNA
MSTRG.52076.1	0h	5h	OK	0.593626	6.94817	3.54901	3.91388	5e-05	0.00591181	noncoding	LncRNA
MSTRG.52211.1	0h	5h	OK	2.42385	7.78975	1.68428	3.69954	5e-05	0.00591181	coding	/
MSTRG.52377.1	0h	5h	OK	0	1.79162	inf	#NAME?	5e-05	0.00591181	noncoding	LncRNA
MSTRG.52557.1	0h	5h	OK	0.977664	13.4051	3.7773	3.97949	5e-05	0.00591181	coding	/
MSTRG.53436.1	0h	5h	OK	4.48088	11.0868	1.30699	2.33697	0.0003	0.0264282	coding	/
MSTRG.53816.1	0h	5h	OK	3.69576	8.73996	1.24176	2.50644	5e-05	0.00591181	coding	/
MSTRG.542.1	0h	5h	OK	11.0795	5.02204	-1.14154	-2.38912	0.00015	0.0146848	noncoding	LncRNA
MSTRG.55851.1	0h	5h	OK	3.99552	16.9392	2.08391	3.55667	5e-05	0.00591181	coding	/
MSTRG.56339.1	0h	5h	OK	2.22574	11.9469	2.42428	4.2827	5e-05	0.00591181	noncoding	LncRNA
MSTRG.56701.1	0h	5h	OK	46.6285	147.494	1.66137	3.6654	5e-05	0.00591181	noncoding	LncRNA
MSTRG.57291.1	0h	5h	OK	3.05607	7.75724	1.34387	2.56762	5e-05	0.00591181	coding	/
MSTRG.57624.2	0h	5h	OK	2.77647	0.430925	-2.68774	-2.85491	0.0002	0.0190967	coding	/
MSTRG.57854.1	0h	5h	OK	3.06359	49.1149	4.00286	3.45232	5e-05	0.00591181	noncoding	LncRNA
MSTRG.58537.1	0h	5h	OK	1.25158	10.4008	3.05487	4.01442	5e-05	0.00591181	noncoding	LncRNA
MSTRG.58934.1	0h	5h	OK	3.55098	10.358	1.54445	2.83812	5e-05	0.00591181	coding	/
MSTRG.59137.1	0h	5h	OK	3.83405	13.1736	1.78071	2.96563	5e-05	0.00591181	noncoding	LncRNA
MSTRG.59209.1	0h	5h	OK	1.18427	4.63813	1.96955	2.49987	0.00055	0.0417928	coding	/
MSTRG.60054.1	0h	5h	OK	6.86306	20.2313	1.55966	2.892	5e-05	0.00591181	noncoding	LncRNA
MSTRG.62802.1	0h	5h	OK	3.44986	18.6614	2.43545	5.0281	5e-05	0.00591181	coding	/
MSTRG.63271.1	0h	5h	OK	4.80602	2.07063	-1.21477	-2.16406	0.0004	0.0328453	coding	/
MSTRG.63949.1	0h	5h	OK	0.847248	3.04262	1.84446	2.44351	0.00055	0.0417928	coding	/
MSTRG.66006.1	0h	5h	OK	9.0181	2.68793	-1.74633	-2.79082	5e-05	0.00591181	noncoding	LncRNA
MSTRG.66062.1	0h	5h	OK	2.32288	9.02202	1.95753	2.86407	0.0001	0.0105361	noncoding	LncRNA
MSTRG.67424.1	0h	5h	OK	8.23633	2.95129	-1.48066	-2.78466	5e-05	0.00591181	noncoding	LncRNA
MSTRG.67433.1	0h	5h	OK	11.1252	23.3015	1.0666	2.17719	5e-05	0.00591181	noncoding	LncRNA
MSTRG.67664.1	0h	5h	OK	0.173254	3.10911	4.16554	3.80453	0.00025	0.022892	coding	/
MSTRG.67711.1	0h	5h	OK	15.0927	34.6541	1.19917	3.15357	5e-05	0.00591181	coding	/
MSTRG.6773.1	0h	5h	OK	10.1839	2.2019	-2.20947	-3.71861	5e-05	0.00591181	coding	/
MSTRG.67849.1	0h	5h	OK	6.89735	13.9556	1.01673	2.08676	0.00045	0.0360335	noncoding	LncRNA
MSTRG.68236.1	0h	5h	OK	4.09078	22.5094	2.46008	3.05418	5e-05	0.00591181	coding	/
MSTRG.68661.1	0h	5h	OK	1.58915	7.84896	2.30424	4.4716	5e-05	0.00591181	coding	/
MSTRG.68733.1	0h	5h	OK	0.86546	3.70513	2.09799	3.02901	5e-05	0.00591181	coding	/
MSTRG.69002.1	0h	5h	OK	18.8266	76.4075	2.02094	5.09375	5e-05	0.00591181	coding	/
MSTRG.69089.1	0h	5h	OK	35.6797	100.884	1.49953	3.73085	5e-05	0.00591181	coding	/
MSTRG.6912.1	0h	5h	OK	13.4716	5.57859	-1.27195	-2.56491	5e-05	0.00591181	noncoding	LncRNA
MSTRG.69185.1	0h	5h	OK	0.490266	2.95567	2.59185	2.77197	0.0004	0.0328453	noncoding	LncRNA
MSTRG.69515.2	0h	5h	OK	12.0441	50.2186	2.05989	2.84623	0.0001	0.0105361	noncoding	LncRNA
MSTRG.6960.1	0h	5h	OK	41.0534	18.6264	-1.14015	-2.36607	0.00025	0.022892	noncoding	LncRNA
MSTRG.69664.1	0h	5h	OK	2.07667	9.02576	2.11978	3.80916	5e-05	0.00591181	coding	/
MSTRG.69879.1	0h	5h	OK	0	5.10926	inf	#NAME?	5e-05	0.00591181	noncoding	LncRNA
MSTRG.69882.1	0h	5h	OK	0	4.83525	inf	#NAME?	5e-05	0.00591181	noncoding	LncRNA
MSTRG.70462.1	0h	5h	OK	2.24107	8.04007	1.84302	3.20353	5e-05	0.00591181	coding	/
MSTRG.71136.1	0h	5h	OK	0.980308	5.99529	2.61252	3.28477	5e-05	0.00591181	coding	/
MSTRG.71151.1	0h	5h	OK	11.1382	24.0293	1.10927	2.59203	5e-05	0.00591181	coding	/
MSTRG.71241.1	0h	5h	OK	1.78992	5.64781	1.6578	2.47149	0.0005	0.0393853	noncoding	LncRNA
MSTRG.71361.2	0h	5h	OK	5.63164	14.5469	1.36909	3.08643	5e-05	0.00591181	coding	/
MSTRG.71783.1	0h	5h	OK	3.57949	14.2237	1.99048	3.15221	5e-05	0.00591181	noncoding	LncRNA
MSTRG.72384.1	0h	5h	OK	50.7572	24.0675	-1.07653	-2.5881	5e-05	0.00591181	coding	/
MSTRG.72615.1	0h	5h	OK	0.42931	1.67627	1.96517	2.25838	0.00055	0.0417928	noncoding	LncRNA
MSTRG.72851.1	0h	5h	OK	5.50351	12.2488	1.15421	2.091	0.0003	0.0264282	coding	/
MSTRG.72865.1	0h	5h	OK	0.859185	9.75179	3.50463	5.03488	5e-05	0.00591181	noncoding	LncRNA
MSTRG.72967.1	0h	5h	OK	5.49928	17.1192	1.6383	3.02362	5e-05	0.00591181	coding	/
MSTRG.73150.1	0h	5h	OK	20.5825	6.92111	-1.57235	-2.74519	5e-05	0.00591181	noncoding	LncRNA
MSTRG.7354.2	0h	5h	OK	0.0563062	2.59441	5.52597	5.17359	0.0001	0.0105361	noncoding	LncRNA
MSTRG.7496.1	0h	5h	OK	33.5759	14.8216	-1.17973	-3.02071	5e-05	0.00591181	noncoding	LncRNA
MSTRG.75319.1	0h	5h	OK	5.35369	1.55907	-1.77984	-2.46823	0.0004	0.0328453	noncoding	LncRNA
MSTRG.7787.1	0h	5h	OK	2.06054	0.56924	-1.85591	-2.75344	0.0001	0.0105361	noncoding	LncRNA
MSTRG.78357.1	0h	5h	OK	7.48795	21.8498	1.54497	3.33151	5e-05	0.00591181	noncoding	LncRNA
MSTRG.78500.1	0h	5h	OK	22.274	10.4457	-1.09245	-2.63165	5e-05	0.00591181	coding	/
MSTRG.7954.1	0h	5h	OK	12.9592	3.26884	-1.98713	-2.57282	0.0005	0.0393853	noncoding	LncRNA
MSTRG.7979.1	0h	5h	OK	8.43471	3.43976	-1.29403	-3.2983	5e-05	0.00591181	coding	/
MSTRG.7983.1	0h	5h	OK	3.85938	0.983893	-1.9718	-2.0655	0.00065	0.0476453	noncoding	LncRNA
MSTRG.7984.1	0h	5h	OK	15.995	7.8305	-1.03044	-2.12352	0.0001	0.0105361	noncoding	LncRNA
MSTRG.8027.1	0h	5h	OK	15.4078	6.47877	-1.24987	-3.14726	5e-05	0.00591181	noncoding	LncRNA
MSTRG.8046.1	0h	5h	OK	2.46272	1.14717	-1.10217	-2.21188	0.0003	0.0264282	noncoding	LncRNA
MSTRG.80802.1	0h	5h	OK	0	1.56594	inf	#NAME?	0.00035	0.0298807	noncoding	LncRNA
MSTRG.81453.1	0h	5h	OK	3.32003	8.88608	1.42035	2.93006	5e-05	0.00591181	noncoding	LncRNA
MSTRG.81535.1	0h	5h	OK	1.81928	5.75996	1.66269	2.41134	0.00045	0.0360335	noncoding	LncRNA
MSTRG.82144.1	0h	5h	OK	9.81476	24.4499	1.31681	2.2043	0.0005	0.0393853	noncoding	LncRNA
MSTRG.832.1	0h	5h	OK	351.222	144.064	-1.28568	-3.33379	5e-05	0.00591181	noncoding	LncRNA
MSTRG.84607.1	0h	5h	OK	18.1899	43.4115	1.25494	2.63805	5e-05	0.00591181	noncoding	LncRNA
MSTRG.84682.1	0h	5h	OK	13.0648	6.45598	-1.01698	-2.25323	0.0001	0.0105361	coding	/
MSTRG.8587.1	0h	5h	OK	17.3048	40.9857	1.24395	2.65964	5e-05	0.00591181	coding	/
MSTRG.86694.1	0h	5h	OK	5.52475	18.3463	1.73151	3.17029	5e-05	0.00591181	noncoding	LncRNA
MSTRG.86992.1	0h	5h	OK	45.2349	18.4077	-1.29712	-2.44443	0.0001	0.0105361	noncoding	LncRNA
MSTRG.87249.1	0h	5h	OK	1.89753	17.1852	3.17897	5.55792	5e-05	0.00591181	coding	/
MSTRG.87302.1	0h	5h	OK	4.82187	12.153	1.33365	2.42494	0.0001	0.0105361	coding	/
MSTRG.87905.1	0h	5h	OK	34.2794	12.8314	-1.41767	-2.91272	5e-05	0.00591181	coding	/
MSTRG.87978.1	0h	5h	OK	166.899	79.9368	-1.06204	-2.72837	5e-05	0.00591181	noncoding	LncRNA
MSTRG.88089.1	0h	5h	OK	7.39112	17.8818	1.27462	2.4671	0.0001	0.0105361	noncoding	LncRNA
MSTRG.88155.1	0h	5h	OK	1.49726	9.16719	2.61416	3.83496	5e-05	0.00591181	noncoding	LncRNA
MSTRG.88332.1	0h	5h	OK	33.5505	78.291	1.22251	3.00806	5e-05	0.00591181	coding	/
MSTRG.88785.1	0h	5h	OK	1.39267	10.0649	2.85341	4.32608	5e-05	0.00591181	noncoding	LncRNA
MSTRG.89487.1	0h	5h	OK	10.0814	22.5048	1.15853	2.76761	5e-05	0.00591181	noncoding	LncRNA
MSTRG.89677.1	0h	5h	OK	4.37042	9.88031	1.17678	2.39118	0.0001	0.0105361	coding	/
MSTRG.89763.2	0h	5h	OK	2.90268	7.64919	1.39792	2.12094	0.0006	0.0447717	coding	/
MSTRG.89849.1	0h	5h	OK	9.17867	30.0208	1.70961	2.67629	5e-05	0.00591181	noncoding	LncRNA
MSTRG.89934.1	0h	5h	OK	186.843	90.6821	-1.04294	-2.53735	5e-05	0.00591181	noncoding	LncRNA
MSTRG.89935.1	0h	5h	OK	39.6638	154.522	1.96192	4.05132	5e-05	0.00591181	noncoding	LncRNA
MSTRG.90259.1	0h	5h	OK	2.72571	8.88136	1.70415	2.55638	0.0001	0.0105361	noncoding	LncRNA
MSTRG.90711.2	0h	5h	OK	10.2027	3.5937	-1.50541	-2.76247	5e-05	0.00591181	coding	/
MSTRG.90722.1	0h	5h	OK	1.89175	4.26676	1.17342	2.34479	0.0002	0.0190967	coding	/
MSTRG.90771.1	0h	5h	OK	2.32842	34.7986	3.90161	4.38243	5e-05	0.00591181	coding	/
MSTRG.91390.1	0h	5h	OK	23.3313	109.324	2.22827	5.34516	5e-05	0.00591181	noncoding	LncRNA
MSTRG.91444.1	0h	5h	OK	23.7744	61.5507	1.37237	3.25673	5e-05	0.00591181	noncoding	LncRNA
MSTRG.93123.1	0h	5h	OK	2.70872	7.07452	1.38502	2.68134	5e-05	0.00591181	noncoding	LncRNA
MSTRG.94015.1	0h	5h	OK	0.114926	1.77587	3.94975	3.62404	0.00015	0.0146848	noncoding	LncRNA
MSTRG.94391.1	0h	5h	OK	15.6863	126.054	3.00647	6.48502	5e-05	0.00591181	noncoding	LncRNA
MSTRG.94524.1	0h	5h	OK	4.21997	11.4152	1.43565	2.50662	0.0001	0.0105361	noncoding	LncRNA
MSTRG.94561.1	0h	5h	OK	1.72743	5.45377	1.65863	2.48711	5e-05	0.00591181	noncoding	LncRNA
MSTRG.94678.1	0h	5h	OK	1.39005	4.00742	1.52754	2.52708	5e-05	0.00591181	coding	/
MSTRG.94988.1	0h	5h	OK	10.8827	29.4167	1.4346	2.9753	5e-05	0.00591181	noncoding	LncRNA
MSTRG.95192.1	0h	5h	OK	0.162396	1.35969	3.06568	3.27504	0.00055	0.0417928	coding	/
MSTRG.96372.1	0h	5h	OK	5.1469	10.6501	1.04909	2.33482	5e-05	0.00591181	noncoding	LncRNA
MSTRG.96970.1	0h	5h	OK	6.39994	26.1219	2.02913	4.31106	5e-05	0.00591181	coding	/
MSTRG.97046.1	0h	5h	OK	2.89888	10.0469	1.79318	2.44416	0.0001	0.0105361	coding	/
MSTRG.97512.1	0h	5h	OK	169.415	70.2675	-1.26963	-3.01449	5e-05	0.00591181	coding	/
MSTRG.9932.1	0h	5h	OK	4.72075	1.54747	-1.6091	-2.80373	5e-05	0.00591181	coding	/

## Sheet: 2hDEG
test_id	sample_1	sample_2	status	value_1	value_2	log2(fold_change)	test_stat	p_value	q_value	CPC_coding	LncRNA
AUR62000014-RA	0h	2h	OK	2.77086	1.36953	-1.01665	-1.71969	0.0052	0.037639	coding	/
AUR62000038-RA	0h	2h	OK	7.35723	2.7621	-1.4134	-3.27191	5e-05	0.000677386	coding	/
AUR62000085-RA	0h	2h	OK	5.26349	2.28132	-1.20615	-2.59379	5e-05	0.000677386	coding	/
AUR62000097-RA	0h	2h	OK	1.97797	0.796443	-1.31238	-2.09237	0.00115	0.0109054	coding	/
AUR62000145-RA	0h	2h	OK	2.61251	6.5914	1.33515	3.26608	5e-05	0.000677386	coding	/
AUR62000148-RA	0h	2h	OK	3.20819	82.0455	4.67659	12.7325	5e-05	0.000677386	coding	/
AUR62000156-RA	0h	2h	OK	44.728	13.4169	-1.73712	-4.95701	5e-05	0.000677386	coding	/
AUR62000176-RA	0h	2h	OK	17.0003	82.1404	2.27253	6.7809	5e-05	0.000677386	coding	/
AUR62000211-RA	0h	2h	OK	2.66589	5.85099	1.13406	1.80661	0.0032	0.0252521	coding	/
AUR62000216-RA	0h	2h	OK	3.05847	9.75268	1.67299	2.44042	0.0003	0.00339802	coding	/
AUR62000218-RA	0h	2h	OK	5.33231	11.4332	1.1004	1.94035	0.0027	0.021981	coding	/
AUR62000260-RA	0h	2h	OK	7.46701	16.5095	1.14469	3.37541	5e-05	0.000677386	coding	/
AUR62000279-RA	0h	2h	OK	0.616234	1.76595	1.5189	2.25903	0.00095	0.00927935	coding	/
AUR62000310-RA	0h	2h	OK	3.25405	0.86365	-1.91372	-2.55913	0.0009	0.00885854	coding	/
AUR62000314-RA	0h	2h	OK	12.1637	5.98263	-1.02373	-2.0696	0.00085	0.00843816	coding	/
AUR62000316-RA	0h	2h	OK	0.245083	2.29147	3.22493	3.35469	0.0004	0.00438463	coding	/
AUR62000317-RA	0h	2h	OK	0.982954	15.1151	3.94273	4.6565	5e-05	0.000677386	coding	/
AUR62000332-RA	0h	2h	OK	16.4892	3.74113	-2.13997	-5.01914	5e-05	0.000677386	coding	/
AUR62000335-RA	0h	2h	OK	2.48512	17.3841	2.80638	5.83968	5e-05	0.000677386	coding	/
AUR62000345-RA	0h	2h	OK	2.38219	5.75327	1.27209	3.10429	5e-05	0.000677386	coding	/
AUR62000372-RA	0h	2h	OK	1.60412	3.27698	1.03058	2.53454	5e-05	0.000677386	coding	/
AUR62000431-RA	0h	2h	OK	1.35413	28.408	4.39086	7.97391	5e-05	0.000677386	coding	/
AUR62000432-RA	0h	2h	OK	5.4275	168.69	4.95794	10.2284	5e-05	0.000677386	coding	/
AUR62000452-RA	0h	2h	OK	8.13552	2.81432	-1.53145	-3.0464	5e-05	0.000677386	coding	/
AUR62000485-RA	0h	2h	OK	3.35893	21.9142	2.70579	6.76873	5e-05	0.000677386	coding	/
AUR62000487-RA	0h	2h	OK	9.46193	4.50637	-1.07017	-2.24898	0.0002	0.00238948	coding	/
AUR62000525-RA	0h	2h	OK	11.5065	5.3179	-1.11352	-2.64242	5e-05	0.000677386	coding	/
AUR62000559-RA	0h	2h	OK	0.203839	1.23679	2.6011	3.31357	5e-05	0.000677386	coding	/
AUR62000600-RA	0h	2h	OK	15.2492	3.84737	-1.98679	-4.24498	5e-05	0.000677386	coding	/
AUR62000608-RA	0h	2h	OK	6.7537	2.5196	-1.42248	-2.81295	5e-05	0.000677386	coding	/
AUR62000631-RA	0h	2h	OK	5.04023	1.39566	-1.85254	-4.34511	5e-05	0.000677386	coding	/
AUR62000663-RA	0h	2h	OK	8.84648	22.8209	1.36718	3.70989	5e-05	0.000677386	coding	/
AUR62000681-RA	0h	2h	OK	5.36487	1.86926	-1.52108	-2.57611	0.0001	0.00128341	coding	/
AUR62000695-RA	0h	2h	OK	0.934441	5.37906	2.52518	3.08032	0.0001	0.00128341	coding	/
AUR62000701-RA	0h	2h	OK	3.09277	1.31503	-1.2338	-2.01863	0.00065	0.00669571	coding	/
AUR62000707-RA	0h	2h	OK	11.4321	33.1078	1.53408	4.12481	5e-05	0.000677386	coding	/
AUR62000744-RA	0h	2h	OK	10.4464	22.1529	1.08449	3.3069	5e-05	0.000677386	coding	/
AUR62000754-RA	0h	2h	OK	129.487	405.151	1.64565	5.54893	5e-05	0.000677386	coding	/
AUR62000766-RA	0h	2h	OK	70.6098	177.039	1.32613	3.7527	5e-05	0.000677386	coding	/
AUR62000775-RA	0h	2h	OK	0.597043	3.43459	2.52423	1.75347	0.00625	0.043608	coding	/
AUR62000781-RA	0h	2h	OK	19.9183	41.3765	1.05471	2.87278	5e-05	0.000677386	coding	/
AUR62000796-RA	0h	2h	OK	1.01033	2.67484	1.40462	2.01164	0.0012	0.0112748	coding	/
AUR62000805-RA	0h	2h	OK	3.5205	7.98241	1.18104	2.67713	0.0001	0.00128341	coding	/
AUR62000830-RA	0h	2h	OK	3.31857	1.27818	-1.37647	-2.31561	0.0003	0.00339802	coding	/
AUR62000873-RA	0h	2h	OK	11.87	52.0273	2.13195	4.56752	5e-05	0.000677386	coding	/
AUR62000882-RA	0h	2h	OK	1.01293	4.72208	2.22089	2.79924	0.0003	0.00339802	coding	/
AUR62001001-RA	0h	2h	OK	36.5713	73.3252	1.0036	2.10606	0.0003	0.00339802	coding	/
AUR62001102-RA	0h	2h	OK	3.00076	6.06793	1.01588	2.5715	5e-05	0.000677386	coding	/
AUR62001139-RA	0h	2h	OK	6.22674	21.6042	1.79476	4.91828	5e-05	0.000677386	coding	/
AUR62001156-RA	0h	2h	OK	19.1703	4.63742	-2.04748	-2.04906	0.0043	0.0322173	coding	/
AUR62001159-RA	0h	2h	OK	29.2017	13.9294	-1.06792	-3.05114	5e-05	0.000677386	coding	/
AUR62001171-RA	0h	2h	OK	0.643524	1.70034	1.40175	2.25292	0.0004	0.00438463	coding	/
AUR62001178-RA	0h	2h	OK	0.757594	6.88765	3.18452	6.21571	5e-05	0.000677386	coding	/
AUR62001191-RA	0h	2h	OK	35.2795	14.5925	-1.27361	-1.8777	0.0015	0.0135722	coding	/
AUR62001198-RA	0h	2h	OK	377.035	120.261	-1.64853	-5.68817	5e-05	0.000677386	coding	/
AUR62001205-RA	0h	2h	OK	35.2302	11.692	-1.59129	-4.2691	5e-05	0.000677386	coding	/
AUR62001210-RA	0h	2h	OK	48.6325	3.71705	-3.70969	-9.79398	5e-05	0.000677386	coding	/
AUR62001219-RA	0h	2h	OK	15.6689	5.49063	-1.51286	-4.26439	5e-05	0.000677386	coding	/
AUR62001251-RA	0h	2h	OK	2.76296	5.5368	1.00284	2.02717	0.0014	0.012806	coding	/
AUR62001253-RA	0h	2h	OK	4.72075	31.2843	2.72835	7.74639	5e-05	0.000677386	coding	/
AUR62001254-RA	0h	2h	OK	36.859	10.4325	-1.82093	-5.35475	5e-05	0.000677386	coding	/
AUR62001259-RA	0h	2h	OK	25.919	61.9271	1.25656	4.37521	5e-05	0.000677386	coding	/
AUR62001302-RA	0h	2h	OK	23.7667	7.60492	-1.64394	-4.03859	5e-05	0.000677386	coding	/
AUR62001348-RA	0h	2h	OK	131.546	34.4737	-1.932	-6.22597	5e-05	0.000677386	coding	/
AUR62001350-RA	0h	2h	OK	7.7474	17.4772	1.17369	3.26198	5e-05	0.000677386	coding	/
AUR62001376-RA	0h	2h	OK	8.26432	3.01096	-1.45667	-2.59752	5e-05	0.000677386	coding	/
AUR62001398-RA	0h	2h	OK	90.6213	366.261	2.01495	4.0598	5e-05	0.000677386	coding	/
AUR62001409-RA	0h	2h	OK	8.91311	2.04499	-2.12383	-5.49409	5e-05	0.000677386	coding	/
AUR62001412-RA	0h	2h	OK	46.1461	17.8068	-1.37378	-3.90808	5e-05	0.000677386	coding	/
AUR62001446-RA	0h	2h	OK	1.1836	106.729	6.49463	10.3287	5e-05	0.000677386	coding	/
AUR62001467-RA	0h	2h	OK	5.88009	43.4268	2.88468	7.83587	5e-05	0.000677386	coding	/
AUR62001471-RA	0h	2h	OK	1.19821	9.23487	2.94622	5.02056	5e-05	0.000677386	coding	/
AUR62001474-RA	0h	2h	OK	3.86722	12.5626	1.69977	4.20099	5e-05	0.000677386	coding	/
AUR62001475-RA	0h	2h	OK	2.73882	13.9708	2.35079	3.76261	5e-05	0.000677386	coding	/
AUR62001482-RA	0h	2h	OK	66.3697	17.8049	-1.89825	-5.92443	5e-05	0.000677386	coding	/
AUR62001495-RA	0h	2h	OK	387.703	69.5323	-2.4792	-8.16387	5e-05	0.000677386	coding	/
AUR62001496-RA	0h	2h	OK	511.341	105.311	-2.27963	-7.40616	5e-05	0.000677386	coding	/
AUR62001505-RA	0h	2h	OK	1.15703	10.1905	3.13872	3.07803	0.0004	0.00438463	coding	/
AUR62001534-RA	0h	2h	OK	7.25031	54.8742	2.92001	3.45766	5e-05	0.000677386	coding	/
AUR62001551-RA	0h	2h	OK	0.543881	2.07088	1.92888	2.71832	0.0003	0.00339802	coding	/
AUR62001595-RA	0h	2h	OK	49.6544	250.556	2.33514	5.78166	5e-05	0.000677386	coding	/
AUR62001602-RA	0h	2h	OK	3.58035	1.3194	-1.44022	-1.86685	0.0033	0.0259189	coding	/
AUR62001619-RA	0h	2h	OK	4.19833	20.1172	2.26054	5.59183	5e-05	0.000677386	coding	/
AUR62001676-RA	0h	2h	OK	14.3427	4.55103	-1.65605	-2.41645	5e-05	0.000677386	coding	/
AUR62001701-RA	0h	2h	OK	2.00111	12.8464	2.68249	4.56678	5e-05	0.000677386	coding	/
AUR62001706-RA	0h	2h	OK	3.04895	1.33449	-1.19203	-2.18692	0.00055	0.00579049	coding	/
AUR62001743-RA	0h	2h	OK	0.75276	2.8049	1.89769	2.45656	5e-05	0.000677386	coding	/
AUR62001752-RA	0h	2h	OK	18.2024	2.85946	-2.67031	-4.71009	5e-05	0.000677386	coding	/
AUR62001759-RA	0h	2h	OK	4.09861	40.4677	3.30356	8.23322	5e-05	0.000677386	coding	/
AUR62001765-RA	0h	2h	OK	5.46544	18.5586	1.76368	2.42029	0.00075	0.00757795	coding	/
AUR62001769-RA	0h	2h	OK	10.215	22.769	1.15639	3.5881	5e-05	0.000677386	coding	/
AUR62001790-RA	0h	2h	OK	3.23622	1.08621	-1.575	-3.14512	5e-05	0.000677386	coding	/
AUR62001791-RA	0h	2h	OK	14.2169	3.50773	-2.019	-2.72559	5e-05	0.000677386	coding	/
AUR62001793-RA	0h	2h	OK	7.57319	2.80019	-1.43538	-2.99847	5e-05	0.000677386	coding	/
AUR62001798-RA	0h	2h	OK	15.9593	7.70963	-1.04967	-2.37343	5e-05	0.000677386	coding	/
AUR62001811-RA	0h	2h	OK	208.5	85.8379	-1.28036	-3.63771	5e-05	0.000677386	coding	/
AUR62001818-RA	0h	2h	OK	151.659	18.9724	-2.99885	-9.86049	5e-05	0.000677386	coding	/
AUR62001841-RA	0h	2h	OK	6.48928	33.4131	2.36429	5.99624	5e-05	0.000677386	coding	/
AUR62001857-RA	0h	2h	OK	0.935013	47.3975	5.66368	7.75084	5e-05	0.000677386	coding	/
AUR62001861-RA	0h	2h	OK	6.4756	16.7101	1.36764	4.35704	5e-05	0.000677386	coding	/
AUR62001866-RA	0h	2h	OK	5.22066	2.53758	-1.04078	-1.89242	0.0023	0.0193178	coding	/
AUR62001871-RA	0h	2h	OK	9.02034	2.41263	-1.90257	-3.06482	5e-05	0.000677386	coding	/
AUR62001899-RA	0h	2h	OK	16.6196	48.6129	1.54846	4.81409	5e-05	0.000677386	coding	/
AUR62001908-RA	0h	2h	OK	0	3.1452	inf	#NAME?	5e-05	0.000677386	coding	/
AUR62001910-RA	0h	2h	OK	7.86327	3.58077	-1.13486	-2.3505	0.0001	0.00128341	coding	/
AUR62001921-RA	0h	2h	OK	7.19815	2.28541	-1.65517	-1.9977	0.0047	0.0345856	coding	/
AUR62001972-RA	0h	2h	OK	0.444704	1.93373	2.12047	2.91901	0.0001	0.00128341	coding	/
AUR62001977-RA	0h	2h	OK	13.7169	3.55038	-1.94991	-4.61218	5e-05	0.000677386	coding	/
AUR62001990-RA	0h	2h	OK	0.220701	3.70979	4.07117	4.28059	0.0003	0.00339802	coding	/
AUR62002005-RA	0h	2h	OK	6.1257	56.7973	3.21288	6.28542	5e-05	0.000677386	coding	/
AUR62002021-RA	0h	2h	OK	122.342	53.9738	-1.18059	-3.83411	5e-05	0.000677386	coding	/
AUR62002023-RA	0h	2h	OK	2.11376	12.0978	2.51686	5.34953	5e-05	0.000677386	coding	/
AUR62002035-RA	0h	2h	OK	5.34082	51.133	3.25912	8.22864	5e-05	0.000677386	coding	/
AUR62002066-RA	0h	2h	OK	8.9435	3.79024	-1.23855	-2.63239	0.00015	0.00185128	coding	/
AUR62002081-RA	0h	2h	OK	6.385	18.6742	1.54829	3.09739	5e-05	0.000677386	coding	/
AUR62002085-RA	0h	2h	OK	15.2364	4.19972	-1.85916	-4.8559	5e-05	0.000677386	coding	/
AUR62002092-RA	0h	2h	OK	8.32201	19.2743	1.21168	2.82427	5e-05	0.000677386	coding	/
AUR62002112-RA	0h	2h	OK	0.90354	3.72757	2.04457	3.69277	5e-05	0.000677386	coding	/
AUR62002129-RA	0h	2h	OK	99.1102	15.4474	-2.68167	-2.71547	0.00015	0.00185128	coding	/
AUR62002145-RA	0h	2h	OK	18.8496	7.08594	-1.41151	-2.61015	5e-05	0.000677386	coding	/
AUR62002167-RA	0h	2h	OK	24.649	7.0915	-1.79737	-5.71381	5e-05	0.000677386	coding	/
AUR62002194-RA	0h	2h	OK	12.2115	34.1946	1.48553	3.87689	5e-05	0.000677386	coding	/
AUR62002203-RA	0h	2h	OK	41.4899	12.0091	-1.78863	-5.85576	5e-05	0.000677386	coding	/
AUR62002221-RA	0h	2h	OK	8.13634	1.45741	-2.48097	-6.20878	5e-05	0.000677386	coding	/
AUR62002239-RA	0h	2h	OK	4.57303	12.9951	1.50675	3.45221	5e-05	0.000677386	coding	/
AUR62002242-RA	0h	2h	OK	2.5382	9.25	1.86565	3.69022	5e-05	0.000677386	coding	/
AUR62002285-RA	0h	2h	OK	5.86192	2.43456	-1.26771	-2.55796	0.0001	0.00128341	coding	/
AUR62002308-RA	0h	2h	OK	0.646106	1.7499	1.43743	2.49023	0.00025	0.00289824	coding	/
AUR62002313-RA	0h	2h	OK	416.696	144.538	-1.52754	-5.31612	5e-05	0.000677386	coding	/
AUR62002379-RA	0h	2h	OK	62.4477	283.716	2.18373	7.00787	5e-05	0.000677386	coding	/
AUR62002440-RA	0h	2h	OK	0.306933	4.07979	3.7325	3.52354	0.00085	0.00843816	coding	/
AUR62002459-RA	0h	2h	OK	1.97955	11.0442	2.48005	4.83223	5e-05	0.000677386	coding	/
AUR62002462-RA	0h	2h	OK	27.2022	67.0786	1.30213	3.94592	5e-05	0.000677386	coding	/
AUR62002555-RA	0h	2h	OK	1.64014	0.781106	-1.07023	-1.71534	0.00505	0.0367389	coding	/
AUR62002596-RA	0h	2h	OK	1.57085	42.7005	4.76464	4.11184	0.00035	0.00390194	coding	/
AUR62002674-RA	0h	2h	OK	0.771307	2.0585	1.41621	1.73505	0.0065	0.0450131	coding	/
AUR62002752-RA	0h	2h	OK	0.318555	7.3507	4.52826	4.17684	0.00025	0.00289824	coding	/
AUR62002766-RA	0h	2h	OK	3.46981	106.363	4.938	12.2602	5e-05	0.000677386	coding	/
AUR62002797-RA	0h	2h	OK	0.599903	28.527	5.57146	9.66956	5e-05	0.000677386	coding	/
AUR62002811-RA	0h	2h	OK	8.18695	4.08228	-1.00395	-2.85253	5e-05	0.000677386	coding	/
AUR62002884-RA	0h	2h	OK	1.37655	8.32426	2.59626	3.87176	5e-05	0.000677386	coding	/
AUR62002893-RA	0h	2h	OK	0.199688	2.8512	3.83575	2.79121	0.00285	0.022966	coding	/
AUR62002901-RA	0h	2h	OK	23.7082	6.81099	-1.79945	-2.39661	0.00235	0.0196581	coding	/
AUR62002921-RA	0h	2h	OK	5.31499	2.24643	-1.24243	-2.96849	5e-05	0.000677386	coding	/
AUR62002959-RA	0h	2h	OK	3.85667	10.9727	1.50849	4.2345	5e-05	0.000677386	coding	/
AUR62002970-RA	0h	2h	OK	5.61988	0.985114	-2.51218	-4.16373	5e-05	0.000677386	coding	/
AUR62003019-RA	0h	2h	OK	12.5492	4.70294	-1.41596	-3.42289	5e-05	0.000677386	coding	/
AUR62003031-RA	0h	2h	OK	6.67208	27.0026	2.01689	5.44436	5e-05	0.000677386	coding	/
AUR62003065-RA	0h	2h	OK	29.9459	8.58378	-1.80268	-3.7641	5e-05	0.000677386	coding	/
AUR62003069-RA	0h	2h	OK	25.3459	7.35745	-1.78447	-3.35714	5e-05	0.000677386	coding	/
AUR62003117-RA	0h	2h	OK	1.91935	9.35173	2.28462	5.62403	5e-05	0.000677386	coding	/
AUR62003133-RA	0h	2h	OK	13.0711	37.5426	1.52215	2.0765	0.00055	0.00579049	coding	/
AUR62003172-RA	0h	2h	OK	0.40659	1.19084	1.55033	2.12027	0.0017	0.0150558	coding	/
AUR62003186-RA	0h	2h	OK	27.8528	6.40531	-2.12048	-5.86822	5e-05	0.000677386	coding	/
AUR62003192-RA	0h	2h	OK	1.57143	3.57418	1.18554	1.91828	0.00225	0.0189666	coding	/
AUR62003195-RA	0h	2h	OK	0.599725	6.92769	3.53	3.74016	5e-05	0.000677386	coding	/
AUR62003203-RA	0h	2h	OK	35.0159	14.13	-1.30925	-2.53305	5e-05	0.000677386	coding	/
AUR62003206-RA	0h	2h	OK	1.16452	4.29018	1.8813	2.80748	5e-05	0.000677386	coding	/
AUR62003207-RA	0h	2h	OK	0.7523	3.52659	2.22889	3.30853	5e-05	0.000677386	coding	/
AUR62003212-RA	0h	2h	OK	7.01603	2.71496	-1.36972	-3.08827	5e-05	0.000677386	coding	/
AUR62003233-RA	0h	2h	OK	5.12614	12.7727	1.31711	3.96591	5e-05	0.000677386	coding	/
AUR62003255-RA	0h	2h	OK	4.60989	31.5462	2.77466	7.35193	5e-05	0.000677386	coding	/
AUR62003269-RA	0h	2h	OK	0.355232	14.4322	5.34439	7.1704	5e-05	0.000677386	coding	/
AUR62003321-RA	0h	2h	OK	0.93452	2.20784	1.24034	1.89096	0.00135	0.0124223	coding	/
AUR62003336-RA	0h	2h	OK	49.952	145.739	1.54478	3.36445	5e-05	0.000677386	coding	/
AUR62003338-RA	0h	2h	OK	38.5541	125.041	1.69745	4.63763	5e-05	0.000677386	coding	/
AUR62003358-RA	0h	2h	OK	7.8756	61.2277	2.95872	8.85766	5e-05	0.000677386	coding	/
AUR62003390-RA	0h	2h	OK	5.10673	22.9923	2.17068	5.78547	5e-05	0.000677386	coding	/
AUR62003413-RA	0h	2h	OK	19.077	41.1951	1.11064	2.57677	5e-05	0.000677386	coding	/
AUR62003424-RA	0h	2h	OK	0.489072	3.06632	2.64839	2.57568	0.0024	0.0199986	coding	/
AUR62003427-RA	0h	2h	OK	22.9948	7.27199	-1.66088	-5.02409	5e-05	0.000677386	coding	/
AUR62003432-RA	0h	2h	OK	6.0118	14.5904	1.27915	2.16064	0.00035	0.00390194	coding	/
AUR62003441-RA	0h	2h	OK	55.6508	6.61484	-3.07262	-3.96722	5e-05	0.000677386	coding	/
AUR62003453-RA	0h	2h	OK	1.21311	0.359764	-1.75359	-2.45195	0.00035	0.00390194	coding	/
AUR62003463-RA	0h	2h	OK	24.7258	8.23304	-1.58652	-4.87001	5e-05	0.000677386	coding	/
AUR62003598-RA	0h	2h	OK	0.698449	5.14334	2.88048	4.22311	5e-05	0.000677386	coding	/
AUR62003600-RA	0h	2h	OK	21.8398	7.94404	-1.45901	-3.47486	5e-05	0.000677386	coding	/
AUR62003625-RA	0h	2h	OK	1.32062	3.7781	1.51644	2.74178	5e-05	0.000677386	coding	/
AUR62003683-RA	0h	2h	OK	78.0919	27.1921	-1.52199	-2.26985	0.00065	0.00669571	coding	/
AUR62003711-RA	0h	2h	OK	3.90059	1.35457	-1.52586	-2.72266	0.0001	0.00128341	coding	/
AUR62003712-RA	0h	2h	OK	4.26566	47.0083	3.46207	7.06087	5e-05	0.000677386	coding	/
AUR62003741-RA	0h	2h	OK	15.5372	7.54025	-1.04304	-1.79359	0.00185	0.0161467	coding	/
AUR62003765-RA	0h	2h	OK	3.38144	64.3053	4.24923	6.87169	5e-05	0.000677386	coding	/
AUR62003778-RA	0h	2h	OK	6.08415	23.2488	1.93403	5.24062	5e-05	0.000677386	coding	/
AUR62003813-RA	0h	2h	OK	7.59058	20.5445	1.43647	4.06612	5e-05	0.000677386	coding	/
AUR62003824-RA	0h	2h	OK	6.98423	3.35874	-1.05618	-1.81943	0.0016	0.0143007	coding	/
AUR62003827-RA	0h	2h	OK	20.4247	5.93707	-1.78249	-4.84245	5e-05	0.000677386	coding	/
AUR62003840-RA	0h	2h	OK	9.59138	26.196	1.44954	2.89146	5e-05	0.000677386	coding	/
AUR62003870-RA	0h	2h	OK	6.82574	0.347996	-4.29384	-5.83731	5e-05	0.000677386	coding	/
AUR62003876-RA	0h	2h	OK	0	4.86019	inf	#NAME?	5e-05	0.000677386	coding	/
AUR62003880-RA	0h	2h	OK	13.0638	91.1126	2.80207	8.5706	5e-05	0.000677386	coding	/
AUR62003912-RA	0h	2h	OK	7.26777	28.2745	1.95992	4.05368	5e-05	0.000677386	coding	/
AUR62003913-RA	0h	2h	OK	32.6939	93.4771	1.51559	2.4369	0.00015	0.00185128	coding	/
AUR62003926-RA	0h	2h	OK	6.6718	27.8351	2.06076	2.45166	0.0002	0.00238948	coding	/
AUR62003938-RA	0h	2h	OK	6.4604	15.5604	1.26818	3.45268	5e-05	0.000677386	coding	/
AUR62003944-RA	0h	2h	OK	3.02845	1.08794	-1.47698	-1.9765	0.0032	0.0252521	coding	/
AUR62003949-RA	0h	2h	OK	3.02119	24.3595	3.0113	8.03675	5e-05	0.000677386	coding	/
AUR62003953-RA	0h	2h	OK	106.207	20.6734	-2.36103	-7.11358	5e-05	0.000677386	coding	/
AUR62003959-RA	0h	2h	OK	0.773845	3.00892	1.95913	2.09488	0.00725	0.0490995	coding	/
AUR62003967-RA	0h	2h	OK	23.519	7.88719	-1.57624	-5.03764	5e-05	0.000677386	coding	/
AUR62003991-RA	0h	2h	OK	5.04085	1.22243	-2.04392	-4.18023	5e-05	0.000677386	coding	/
AUR62003996-RA	0h	2h	OK	4.39653	15.3325	1.80215	4.29782	5e-05	0.000677386	coding	/
AUR62004009-RA	0h	2h	OK	9.30062	2.94574	-1.65869	-4.0776	5e-05	0.000677386	coding	/
AUR62004029-RA	0h	2h	OK	17.6331	192.564	3.44898	8.80469	5e-05	0.000677386	noncoding	LncRNA
AUR62004031-RA	0h	2h	OK	10.1281	3.86478	-1.38991	-2.16921	0.0005	0.00533502	coding	/
AUR62004034-RA	0h	2h	OK	14.6092	4.95238	-1.56068	-3.61203	5e-05	0.000677386	noncoding	LncRNA
AUR62004067-RA	0h	2h	OK	24.9102	11.7747	-1.08105	-3.40927	5e-05	0.000677386	coding	/
AUR62004071-RA	0h	2h	OK	73.3952	20.8852	-1.81321	-5.68589	5e-05	0.000677386	coding	/
AUR62004074-RA	0h	2h	OK	5.65184	2.69717	-1.06728	-2.15643	0.0005	0.00533502	coding	/
AUR62004084-RA	0h	2h	OK	9.2739	26.9001	1.53636	3.45933	5e-05	0.000677386	coding	/
AUR62004090-RA	0h	2h	OK	5.431	0.308604	-4.13739	-4.23065	0.0002	0.00238948	coding	/
AUR62004094-RA	0h	2h	OK	9.43075	32.35	1.77832	4.76465	5e-05	0.000677386	coding	/
AUR62004095-RA	0h	2h	OK	4.10214	28.951	2.81916	6.21391	5e-05	0.000677386	coding	/
AUR62004100-RA	0h	2h	OK	141.822	13.9077	-3.35013	-4.28524	5e-05	0.000677386	coding	/
AUR62004102-RA	0h	2h	OK	31.935	8.20772	-1.96008	-2.93575	5e-05	0.000677386	coding	/
AUR62004106-RA	0h	2h	OK	67.1704	23.2786	-1.52882	-4.72154	5e-05	0.000677386	coding	/
AUR62004112-RA	0h	2h	OK	4.97854	2.16779	-1.1995	-2.41899	0.0003	0.00339802	coding	/
AUR62004178-RA	0h	2h	OK	21.1012	58.1293	1.46194	4.34839	5e-05	0.000677386	coding	/
AUR62004208-RA	0h	2h	OK	1.61963	3.84761	1.2483	1.90771	0.0023	0.0193178	coding	/
AUR62004240-RA	0h	2h	OK	9.6469	4.34219	-1.15164	-2.90593	5e-05	0.000677386	coding	/
AUR62004249-RA	0h	2h	OK	4.72015	59.7882	3.66296	9.71121	5e-05	0.000677386	coding	/
AUR62004264-RA	0h	2h	OK	8.42539	24.8108	1.55815	4.04294	5e-05	0.000677386	coding	/
AUR62004288-RA	0h	2h	OK	3.92133	20.022	2.35217	3.83665	5e-05	0.000677386	coding	/
AUR62004299-RA	0h	2h	OK	2.65927	1.12474	-1.24144	-2.31067	0.0002	0.00238948	coding	/
AUR62004345-RA	0h	2h	OK	6.09915	2.45887	-1.31061	-2.18187	0.0007	0.00713988	coding	/
AUR62004353-RA	0h	2h	OK	22.2529	4.06396	-2.45304	-6.13265	5e-05	0.000677386	coding	/
AUR62004413-RA	0h	2h	OK	2.81512	6.11874	1.12004	2.11837	0.0005	0.00533502	coding	/
AUR62004436-RA	0h	2h	OK	20.003	55.9048	1.48276	4.45437	5e-05	0.000677386	coding	/
AUR62004466-RA	0h	2h	OK	12.3676	40.8267	1.72294	2.10732	0.0012	0.0112748	coding	/
AUR62004506-RA	0h	2h	OK	5.90561	2.40503	-1.29603	-1.88139	0.00195	0.0168315	coding	/
AUR62004522-RA	0h	2h	OK	25.3093	2.91019	-3.12048	-4.86103	5e-05	0.000677386	coding	/
AUR62004529-RA	0h	2h	OK	6.39153	2.78942	-1.19619	-2.02914	0.0005	0.00533502	coding	/
AUR62004562-RA	0h	2h	OK	3.70628	18.9781	2.35629	4.35978	5e-05	0.000677386	coding	/
AUR62004567-RA	0h	2h	OK	48.0352	100.275	1.06179	3.34355	5e-05	0.000677386	coding	/
AUR62004568-RA	0h	2h	OK	16.1963	178.443	3.46173	11.2294	5e-05	0.000677386	coding	/
AUR62004579-RA	0h	2h	OK	40.5017	5.23879	-2.95068	-2.31839	0.0023	0.0193178	coding	/
AUR62004595-RA	0h	2h	OK	2.66985	15.8852	2.57285	6.43443	5e-05	0.000677386	coding	/
AUR62004627-RA	0h	2h	OK	44.5774	118.168	1.40645	4.86229	5e-05	0.000677386	coding	/
AUR62004628-RA	0h	2h	OK	18.9347	52.4874	1.47094	4.26027	5e-05	0.000677386	coding	/
AUR62004629-RA	0h	2h	OK	3.75023	7.86736	1.0689	2.85993	5e-05	0.000677386	coding	/
AUR62004667-RA	0h	2h	OK	129.935	277.486	1.09462	3.80197	5e-05	0.000677386	coding	/
AUR62004778-RA	0h	2h	OK	0.85879	2.53355	1.56078	2.67802	0.0002	0.00238948	coding	/
AUR62004850-RA	0h	2h	OK	0.118973	2.38727	4.32666	3.39944	0.0047	0.0345856	coding	/
AUR62004940-RA	0h	2h	OK	4.97863	2.32978	-1.09556	-2.06774	0.0012	0.0112748	coding	/
AUR62004995-RA	0h	2h	OK	29.0111	75.5313	1.38047	4.43489	5e-05	0.000677386	coding	/
AUR62005011-RA	0h	2h	OK	13.2665	2.53916	-2.38536	-2.92755	0.00015	0.00185128	coding	/
AUR62005103-RA	0h	2h	OK	7.58139	26.4538	1.80294	2.31437	0.00175	0.0154215	coding	/
AUR62005132-RA	0h	2h	OK	19.4404	40.3037	1.05185	3.33885	5e-05	0.000677386	coding	/
AUR62005144-RA	0h	2h	OK	3.3643	1.51747	-1.14863	-1.88903	0.0028	0.0226571	coding	/
AUR62005155-RA	0h	2h	OK	1.30759	6.36606	2.28349	5.40345	5e-05	0.000677386	coding	/
AUR62005156-RA	0h	2h	OK	0.785526	2.07304	1.40002	2.75571	5e-05	0.000677386	coding	/
AUR62005168-RA	0h	2h	OK	6.18092	2.96628	-1.05916	-1.67139	0.00685	0.0468386	coding	/
AUR62005186-RA	0h	2h	OK	46.7107	94.6143	1.01831	1.6202	0.0071	0.0482193	noncoding	LncRNA
AUR62005223-RA	0h	2h	OK	7.32915	1.1984	-2.61254	-4.65011	5e-05	0.000677386	coding	/
AUR62005257-RA	0h	2h	OK	7.11444	21.7436	1.61177	1.91492	0.00165	0.0146778	coding	/
AUR62005258-RA	0h	2h	OK	11.7946	41.0799	1.80031	2.76559	5e-05	0.000677386	coding	/
AUR62005261-RA	0h	2h	OK	1.12036	3.96061	1.82176	1.90401	0.00705	0.0479284	coding	/
AUR62005275-RA	0h	2h	OK	7.79651	1.22381	-2.67145	-3.74473	5e-05	0.000677386	coding	/
AUR62005289-RA	0h	2h	OK	21.0709	62.0332	1.55779	5.12741	5e-05	0.000677386	coding	/
AUR62005299-RA	0h	2h	OK	0.637865	1.79954	1.4963	1.76768	0.0045	0.0334369	coding	/
AUR62005312-RA	0h	2h	OK	57.0353	19.1393	-1.57532	-4.26718	5e-05	0.000677386	coding	/
AUR62005366-RA	0h	2h	OK	5.70872	0.797775	-2.83911	-3.62609	5e-05	0.000677386	coding	/
AUR62005380-RA	0h	2h	OK	20.5919	8.16583	-1.33441	-2.64133	5e-05	0.000677386	coding	/
AUR62005392-RA	0h	2h	OK	2.00951	17.6114	3.1316	3.53175	0.0001	0.00128341	coding	/
AUR62005425-RA	0h	2h	OK	4.42103	1.01437	-2.1238	-2.46695	0.0004	0.00438463	coding	/
AUR62005429-RA	0h	2h	OK	1.94681	4.1361	1.08716	3.02776	5e-05	0.000677386	coding	/
AUR62005442-RA	0h	2h	OK	6.50575	17.377	1.41739	3.90093	5e-05	0.000677386	coding	/
AUR62005454-RA	0h	2h	OK	2.29353	5.59597	1.28682	2.56292	0.0001	0.00128341	coding	/
AUR62005464-RA	0h	2h	OK	0.794022	2.67236	1.75087	3.51366	5e-05	0.000677386	coding	/
AUR62005495-RA	0h	2h	OK	1.64111	5.70634	1.79789	1.89765	0.00435	0.0324989	coding	/
AUR62005506-RA	0h	2h	OK	5.88337	21.8826	1.89507	6.01005	5e-05	0.000677386	coding	/
AUR62005536-RA	0h	2h	OK	8.4666	34.2745	2.01728	2.27736	0.0015	0.0135722	coding	/
AUR62005537-RA	0h	2h	OK	36.3493	16.8685	-1.1076	-2.22546	0.0003	0.00339802	coding	/
AUR62005546-RA	0h	2h	OK	1.28139	8.59642	2.74602	3.77184	5e-05	0.000677386	coding	/
AUR62005550-RA	0h	2h	OK	5.97322	1.84502	-1.69487	-3.91653	5e-05	0.000677386	coding	/
AUR62005607-RA	0h	2h	OK	9.53696	4.66039	-1.03308	-2.82622	5e-05	0.000677386	coding	/
AUR62005609-RA	0h	2h	OK	11.1709	28.7765	1.36515	3.91061	5e-05	0.000677386	coding	/
AUR62005616-RA	0h	2h	OK	28.5495	4.91791	-2.53735	-6.82811	5e-05	0.000677386	coding	/
AUR62005624-RA	0h	2h	OK	6.72774	43.1284	2.68044	3.79387	5e-05	0.000677386	coding	/
AUR62005635-RA	0h	2h	OK	5.64795	13.1167	1.21561	3.86199	5e-05	0.000677386	coding	/
AUR62005672-RA	0h	2h	OK	16.5451	2.60049	-2.66955	-4.50179	5e-05	0.000677386	coding	/
AUR62005695-RA	0h	2h	OK	9.75627	94.0597	3.26917	9.52532	5e-05	0.000677386	coding	/
AUR62005701-RA	0h	2h	OK	4.95516	2.08612	-1.24811	-2.3321	0.00075	0.00757795	coding	/
AUR62005740-RA	0h	2h	OK	18.445	8.05013	-1.19615	-3.08034	5e-05	0.000677386	coding	/
AUR62005767-RA	0h	2h	OK	2.64338	1.06348	-1.3136	-1.80457	0.00475	0.0349109	coding	/
AUR62005793-RA	0h	2h	OK	0.57422	7.32827	3.6738	3.29883	0.0013	0.0120581	coding	/
AUR62005805-RA	0h	2h	OK	8.69786	3.01287	-1.52952	-3.75509	5e-05	0.000677386	coding	/
AUR62005808-RA	0h	2h	OK	21.28	8.81655	-1.27121	-2.27089	0.00015	0.00185128	coding	/
AUR62005809-RA	0h	2h	OK	5.96973	2.64271	-1.17565	-2.44168	0.00015	0.00185128	coding	/
AUR62005818-RA	0h	2h	OK	83.8814	26.6983	-1.6516	-4.24427	5e-05	0.000677386	coding	/
AUR62005821-RA	0h	2h	OK	1.1429	8.82485	2.94887	3.46894	5e-05	0.000677386	coding	/
AUR62005877-RA	0h	2h	OK	23.6658	53.6885	1.18181	2.99823	5e-05	0.000677386	coding	/
AUR62005922-RA	0h	2h	OK	21.3263	3.1983	-2.73726	-4.43458	5e-05	0.000677386	coding	/
AUR62005959-RA	0h	2h	OK	10.3444	1.27799	-3.01691	-6.66304	5e-05	0.000677386	coding	/
AUR62005976-RA	0h	2h	OK	5.38727	0.482295	-3.48157	-2.76942	0.00625	0.043608	coding	/
AUR62005977-RA	0h	2h	OK	4.37737	0.964573	-2.1821	-2.46344	0.00095	0.00927935	coding	/
AUR62005984-RA	0h	2h	OK	170.038	370.811	1.12483	3.90932	5e-05	0.000677386	coding	/
AUR62005987-RA	0h	2h	OK	2.58297	9.22349	1.83628	3.83659	5e-05	0.000677386	coding	/
AUR62005995-RA	0h	2h	OK	1.73742	7.44766	2.09984	4.06657	5e-05	0.000677386	coding	/
AUR62005998-RA	0h	2h	OK	2.18962	0.401248	-2.44812	-3.45475	5e-05	0.000677386	coding	/
AUR62006008-RA	0h	2h	OK	6.2307	32.0177	2.36141	5.4335	5e-05	0.000677386	coding	/
AUR62006047-RA	0h	2h	OK	10.3139	25.7218	1.3184	3.90592	5e-05	0.000677386	coding	/
AUR62006073-RA	0h	2h	OK	5.68193	0.576247	-3.30162	-3.15506	0.0005	0.00533502	coding	/
AUR62006098-RA	0h	2h	OK	36.9277	5.14333	-2.84393	-4.53469	5e-05	0.000677386	coding	/
AUR62006104-RA	0h	2h	OK	3.72573	9.04654	1.27984	3.4447	5e-05	0.000677386	coding	/
AUR62006125-RA	0h	2h	OK	3.54468	1.18945	-1.57536	-2.46028	0.00045	0.00486448	coding	/
AUR62006130-RA	0h	2h	OK	0.764565	15.6791	4.35806	6.36098	5e-05	0.000677386	coding	/
AUR62006136-RA	0h	2h	OK	2.69089	29.4768	3.45343	7.80249	5e-05	0.000677386	coding	/
AUR62006208-RA	0h	2h	OK	4.31569	0.13544	-4.99387	-5.31673	0.0001	0.00128341	coding	/
AUR62006217-RA	0h	2h	OK	2.63492	6.45307	1.29222	2.42919	0.00015	0.00185128	coding	/
AUR62006229-RA	0h	2h	OK	43.8392	13.0144	-1.75211	-4.98628	5e-05	0.000677386	coding	/
AUR62006233-RA	0h	2h	OK	10.7093	29.924	1.48244	4.07376	5e-05	0.000677386	coding	/
AUR62006250-RA	0h	2h	OK	59.9176	22.4862	-1.41394	-4.2329	5e-05	0.000677386	coding	/
AUR62006259-RA	0h	2h	OK	15.2657	3.40082	-2.16634	-4.59367	5e-05	0.000677386	coding	/
AUR62006280-RA	0h	2h	OK	116.118	41.7368	-1.4762	-2.61464	5e-05	0.000677386	coding	/
AUR62006282-RA	0h	2h	OK	9.4844	61.8129	2.70428	3.72786	5e-05	0.000677386	coding	/
AUR62006288-RA	0h	2h	OK	25.2571	10.3857	-1.28209	-2.71214	5e-05	0.000677386	coding	/
AUR62006291-RA	0h	2h	OK	6.01558	0.858187	-2.80934	-2.40643	0.00495	0.0361293	coding	/
AUR62006292-RA	0h	2h	OK	21.4259	3.55603	-2.59101	-3.68853	5e-05	0.000677386	coding	/
AUR62006298-RA	0h	2h	OK	12.2734	60.466	2.30059	7.44047	5e-05	0.000677386	coding	/
AUR62006306-RA	0h	2h	OK	577.768	258.765	-1.15885	-4.07743	5e-05	0.000677386	coding	/
AUR62006340-RA	0h	2h	OK	14.7374	29.7886	1.01528	3.2851	5e-05	0.000677386	coding	/
AUR62006370-RA	0h	2h	OK	7.62093	3.7792	-1.01188	-2.80717	5e-05	0.000677386	coding	/
AUR62006381-RA	0h	2h	OK	0.739799	6.67823	3.17426	3.33488	0.0003	0.00339802	coding	/
AUR62006427-RA	0h	2h	OK	6.21386	20.9243	1.75162	4.84818	5e-05	0.000677386	coding	/
AUR62006432-RA	0h	2h	OK	2.51498	6.91227	1.45861	4.11725	5e-05	0.000677386	coding	/
AUR62006436-RA	0h	2h	OK	24.1022	63.5741	1.39928	4.46026	5e-05	0.000677386	coding	/
AUR62006442-RA	0h	2h	OK	53.2705	12.8312	-2.05368	-5.78686	5e-05	0.000677386	coding	/
AUR62006557-RA	0h	2h	OK	3.96542	12.5163	1.65826	4.15608	5e-05	0.000677386	coding	/
AUR62006561-RA	0h	2h	OK	2.6992	9.04106	1.74396	2.66027	5e-05	0.000677386	coding	/
AUR62006567-RA	0h	2h	OK	7.88938	16.838	1.09373	2.78937	5e-05	0.000677386	coding	/
AUR62006617-RA	0h	2h	OK	106.902	284.941	1.41437	4.41818	5e-05	0.000677386	coding	/
AUR62006627-RA	0h	2h	OK	0.716554	4.22087	2.5584	5.98481	5e-05	0.000677386	coding	/
AUR62006661-RA	0h	2h	OK	0.207109	8.26869	5.3192	3.52599	0.00185	0.0161467	coding	/
AUR62006676-RA	0h	2h	OK	4.75549	20.2273	2.08864	4.87945	5e-05	0.000677386	coding	/
AUR62006688-RA	0h	2h	OK	6.11263	1.1095	-2.46189	-3.09113	5e-05	0.000677386	coding	/
AUR62006733-RA	0h	2h	OK	6.94247	1.05761	-2.71464	-2.78599	0.00105	0.0100939	coding	/
AUR62006761-RA	0h	2h	OK	2.40925	53.3034	4.46757	8.48763	5e-05	0.000677386	coding	/
AUR62006777-RA	0h	2h	OK	2.53801	95.2559	5.23004	11.6531	5e-05	0.000677386	coding	/
AUR62006786-RA	0h	2h	OK	0.580125	2.39326	2.04454	2.13859	0.00205	0.0175287	coding	/
AUR62006800-RA	0h	2h	OK	5.02263	1.88402	-1.41463	-2.583	5e-05	0.000677386	coding	/
AUR62006805-RA	0h	2h	OK	5.54961	2.34722	-1.24144	-1.80751	0.00365	0.0281426	coding	/
AUR62006838-RA	0h	2h	OK	0	10.937	inf	#NAME?	5e-05	0.000677386	coding	/
AUR62006870-RA	0h	2h	OK	21.3293	8.44001	-1.33752	-3.84319	5e-05	0.000677386	coding	/
AUR62006877-RA	0h	2h	OK	206.893	71.0162	-1.54266	-5.3601	5e-05	0.000677386	coding	/
AUR62006885-RA	0h	2h	OK	17.1723	303.813	4.14502	11.5098	5e-05	0.000677386	coding	/
AUR62006946-RA	0h	2h	OK	0.598586	1.41936	1.24561	1.72277	0.0026	0.0213255	coding	/
AUR62006956-RA	0h	2h	OK	6.42357	0.865443	-2.89187	-3.59629	0.0001	0.00128341	coding	/
AUR62006964-RA	0h	2h	OK	15.5635	43.519	1.48348	4.65678	5e-05	0.000677386	coding	/
AUR62006984-RA	0h	2h	OK	3.9528	1.36961	-1.52911	-3.66686	5e-05	0.000677386	coding	/
AUR62006985-RA	0h	2h	OK	7.55266	16.7964	1.15309	2.31698	0.00015	0.00185128	coding	/
AUR62006987-RA	0h	2h	OK	20.8755	3.00826	-2.79481	-2.8918	0.00535	0.0385486	coding	/
AUR62006999-RA	0h	2h	OK	4.33841	9.62298	1.14932	2.75794	5e-05	0.000677386	coding	/
AUR62007008-RA	0h	2h	OK	2.95002	0.445603	-2.72689	-2.82113	0.00095	0.00927935	coding	/
AUR62007017-RA	0h	2h	OK	104.708	12.8423	-3.02739	-9.31937	5e-05	0.000677386	coding	/
AUR62007033-RA	0h	2h	OK	1.9943	5.01636	1.33076	2.81295	5e-05	0.000677386	coding	/
AUR62007040-RA	0h	2h	OK	51.4472	6.7948	-2.92059	-3.00406	0.00035	0.00390194	coding	/
AUR62007054-RA	0h	2h	OK	0.231561	33.9551	7.19609	7.63066	5e-05	0.000677386	coding	/
AUR62007055-RA	0h	2h	OK	4.49737	1.65294	-1.44405	-2.79835	5e-05	0.000677386	coding	/
AUR62007067-RA	0h	2h	OK	2.97563	0.875723	-1.76465	-2.37634	0.0007	0.00713988	coding	/
AUR62007070-RA	0h	2h	OK	3.98112	1.74505	-1.1899	-1.91687	0.0017	0.0150558	coding	/
AUR62007090-RA	0h	2h	OK	5.30034	11.5659	1.12572	1.77774	0.00355	0.0275055	coding	/
AUR62007096-RA	0h	2h	OK	2.65708	0.794973	-1.74087	-2.26812	0.00085	0.00843816	coding	/
AUR62007097-RA	0h	2h	OK	5.95963	1.53703	-1.95508	-2.34402	0.00075	0.00757795	coding	/
AUR62007098-RA	0h	2h	OK	3.98052	1.09835	-1.85763	-2.75441	5e-05	0.000677386	coding	/
AUR62007116-RA	0h	2h	OK	13.0072	5.80558	-1.16379	-2.97514	5e-05	0.000677386	coding	/
AUR62007133-RA	0h	2h	OK	6.95419	51.8091	2.89725	8.70309	5e-05	0.000677386	coding	/
AUR62007168-RA	0h	2h	OK	2.31347	0.450749	-2.35966	-3.45219	5e-05	0.000677386	coding	/
AUR62007176-RA	0h	2h	OK	29.7746	100.244	1.75136	3.67704	5e-05	0.000677386	coding	/
AUR62007194-RA	0h	2h	OK	2.62738	10.6028	2.01275	4.06083	5e-05	0.000677386	coding	/
AUR62007198-RA	0h	2h	OK	0.309817	3.72792	3.58888	4.48669	5e-05	0.000677386	coding	/
AUR62007199-RA	0h	2h	OK	0.904738	9.26374	3.35602	6.31543	5e-05	0.000677386	coding	/
AUR62007220-RA	0h	2h	OK	0.661423	108.21	7.35405	8.98659	5e-05	0.000677386	coding	/
AUR62007247-RA	0h	2h	OK	1.01769	6.30819	2.63193	4.39701	5e-05	0.000677386	coding	/
AUR62007257-RA	0h	2h	OK	8.43181	3.41003	-1.30606	-1.8838	0.00245	0.0203335	coding	/
AUR62007259-RA	0h	2h	OK	2.83096	1.14568	-1.30509	-2.85808	5e-05	0.000677386	coding	/
AUR62007260-RA	0h	2h	OK	53.9389	16.5595	-1.70367	-5.28231	5e-05	0.000677386	coding	/
AUR62007294-RA	0h	2h	OK	5.22686	28.2047	2.43192	4.71736	5e-05	0.000677386	coding	/
AUR62007301-RA	0h	2h	OK	12.0926	5.95507	-1.02193	-2.40691	5e-05	0.000677386	coding	/
AUR62007308-RA	0h	2h	OK	10.8488	25.3568	1.22484	3.58508	5e-05	0.000677386	coding	/
AUR62007377-RA	0h	2h	OK	13.7352	5.45038	-1.33345	-2.10169	0.00095	0.00927935	coding	/
AUR62007384-RA	0h	2h	OK	8.2035	0.522871	-3.97171	-3.80433	0.00055	0.00579049	coding	/
AUR62007385-RA	0h	2h	OK	7.68509	0.455161	-4.07761	-4.48172	5e-05	0.000677386	coding	/
AUR62007393-RA	0h	2h	OK	7.60138	1.78106	-2.09353	-3.25668	5e-05	0.000677386	coding	/
AUR62007405-RA	0h	2h	OK	4.97742	1.04807	-2.24766	-2.95804	0.00025	0.00289824	coding	/
AUR62007406-RA	0h	2h	OK	58.8835	9.87088	-2.57661	-6.20115	5e-05	0.000677386	coding	/
AUR62007414-RA	0h	2h	OK	11.6624	5.44633	-1.09851	-2.91955	5e-05	0.000677386	coding	/
AUR62007420-RA	0h	2h	OK	13.9354	51.8041	1.89431	3.89134	5e-05	0.000677386	coding	/
AUR62007441-RA	0h	2h	OK	6.10264	3.03502	-1.00773	-2.13395	0.001	0.00969691	coding	/
AUR62007447-RA	0h	2h	OK	1.10459	6.54185	2.56618	3.4299	5e-05	0.000677386	coding	/
AUR62007493-RA	0h	2h	OK	224.354	83.0488	-1.43375	-1.63327	0.00575	0.0407573	coding	/
AUR62007509-RA	0h	2h	OK	15.0891	51.4152	1.76869	5.06019	5e-05	0.000677386	coding	/
AUR62007532-RA	0h	2h	OK	9.70294	80.2537	3.04807	2.39665	0.0007	0.00713988	coding	/
AUR62007536-RA	0h	2h	OK	3.79973	15.6098	2.03849	2.24915	0.00185	0.0161467	coding	/
AUR62007537-RA	0h	2h	OK	2.21294	58.1284	4.71521	6.58342	5e-05	0.000677386	noncoding	LncRNA
AUR62007539-RA	0h	2h	OK	9.35938	3.12863	-1.58088	-2.37733	0.0002	0.00238948	coding	/
AUR62007557-RA	0h	2h	OK	0.416663	2.81331	2.75532	3.69313	5e-05	0.000677386	coding	/
AUR62007574-RA	0h	2h	OK	6.22376	1.72276	-1.85307	-2.8245	0.0001	0.00128341	coding	/
AUR62007584-RA	0h	2h	OK	73.3021	13.3356	-2.45857	-7.18442	5e-05	0.000677386	coding	/
AUR62007595-RA	0h	2h	OK	2.13814	8.53376	1.99683	3.21817	5e-05	0.000677386	coding	/
AUR62007602-RA	0h	2h	OK	6.00954	0.863968	-2.7982	-4.02347	5e-05	0.000677386	coding	/
AUR62007608-RA	0h	2h	OK	3.72573	17.2364	2.20987	3.67144	5e-05	0.000677386	coding	/
AUR62007613-RA	0h	2h	OK	112.475	10.6228	-3.40437	-3.73424	5e-05	0.000677386	coding	/
AUR62007619-RA	0h	2h	OK	33.2011	16.4803	-1.01049	-2.90062	5e-05	0.000677386	coding	/
AUR62007620-RA	0h	2h	OK	27.5555	9.82064	-1.48845	-4.24636	5e-05	0.000677386	coding	/
AUR62007627-RA	0h	2h	OK	9.90686	3.89128	-1.34818	-3.37752	5e-05	0.000677386	coding	/
AUR62007646-RA	0h	2h	OK	51.0292	252.259	2.30551	7.7444	5e-05	0.000677386	coding	/
AUR62007672-RA	0h	2h	OK	23.2108	7.63243	-1.60458	-4.39271	5e-05	0.000677386	coding	/
AUR62007684-RA	0h	2h	OK	19.1636	181.32	3.2421	9.88442	5e-05	0.000677386	coding	/
AUR62007706-RA	0h	2h	OK	0.645493	2.29386	1.82931	2.05271	0.00225	0.0189666	coding	/
AUR62007738-RA	0h	2h	OK	9.02225	47.4857	2.39593	2.99313	5e-05	0.000677386	coding	/
AUR62007764-RA	0h	2h	OK	3.92672	7.89008	1.00672	3.05529	5e-05	0.000677386	coding	/
AUR62007776-RA	0h	2h	OK	6.48022	25.1437	1.95608	3.03544	5e-05	0.000677386	coding	/
AUR62007785-RA	0h	2h	OK	4.57628	1.79238	-1.3523	-2.83515	5e-05	0.000677386	coding	/
AUR62007808-RA	0h	2h	OK	27.4371	6.24101	-2.13628	-5.8206	5e-05	0.000677386	coding	/
AUR62007810-RA	0h	2h	OK	5.17043	0.806842	-2.67993	-3.94969	5e-05	0.000677386	coding	/
AUR62007822-RA	0h	2h	OK	6.14648	1.34219	-2.19518	-2.66546	0.0023	0.0193178	coding	/
AUR62007853-RA	0h	2h	OK	2.07206	0.328844	-2.65559	-3.19883	0.0001	0.00128341	coding	/
AUR62007974-RA	0h	2h	OK	11.3223	1.6873	-2.74638	-4.89716	5e-05	0.000677386	coding	/
AUR62007975-RA	0h	2h	OK	14.4709	31.074	1.10256	2.84484	5e-05	0.000677386	noncoding	LncRNA
AUR62008009-RA	0h	2h	OK	1.24894	5.27059	2.07726	3.57882	5e-05	0.000677386	coding	/
AUR62008025-RA	0h	2h	OK	10.2848	72.569	2.81884	3.12207	5e-05	0.000677386	coding	/
AUR62008076-RA	0h	2h	OK	10.9031	5.36221	-1.02384	-2.25059	0.00035	0.00390194	coding	/
AUR62008124-RA	0h	2h	OK	6.8806	3.22041	-1.09529	-2.1289	0.00045	0.00486448	coding	/
AUR62008155-RA	0h	2h	OK	6.6216	13.8474	1.06436	2.35695	0.00045	0.00486448	coding	/
AUR62008201-RA	0h	2h	OK	10.1765	1.0198	-3.31888	-3.7932	5e-05	0.000677386	coding	/
AUR62008209-RA	0h	2h	OK	18.8539	85.2706	2.17719	7.07995	5e-05	0.000677386	coding	/
AUR62008240-RA	0h	2h	OK	23.0777	11.4012	-1.01732	-1.79877	0.00295	0.0236232	coding	/
AUR62008249-RA	0h	2h	OK	10.7046	24.6137	1.20123	3.17281	5e-05	0.000677386	coding	/
AUR62008293-RA	0h	2h	OK	10.2708	37.3902	1.8641	1.86281	0.00345	0.0268935	noncoding	LncRNA
AUR62008295-RA	0h	2h	OK	1.93772	5.30692	1.45352	2.43401	0.00025	0.00289824	coding	/
AUR62008320-RA	0h	2h	OK	1.94453	5.5667	1.5174	1.96507	0.00285	0.022966	coding	/
AUR62008325-RA	0h	2h	OK	17.7457	36.7277	1.0494	3.56713	5e-05	0.000677386	coding	/
AUR62008338-RA	0h	2h	OK	1.62871	0.445133	-1.87142	-2.42533	0.0008	0.00801318	coding	/
AUR62008342-RA	0h	2h	OK	14.9157	5.41481	-1.46185	-2.88717	5e-05	0.000677386	coding	/
AUR62008353-RA	0h	2h	OK	251.667	92.076	-1.45062	-3.08137	5e-05	0.000677386	coding	/
AUR62008391-RA	0h	2h	OK	1.28965	0.337338	-1.93472	-1.87526	0.00705	0.0479284	coding	/
AUR62008403-RA	0h	2h	OK	30.9936	5.51454	-2.49066	-4.47938	5e-05	0.000677386	coding	/
AUR62008405-RA	0h	2h	OK	41.5252	20.0296	-1.05185	-2.93366	5e-05	0.000677386	coding	/
AUR62008406-RA	0h	2h	OK	1.099	5.10662	2.21618	2.96831	0.00015	0.00185128	coding	/
AUR62008408-RA	0h	2h	OK	8.08764	21.2328	1.3925	3.79389	5e-05	0.000677386	coding	/
AUR62008423-RA	0h	2h	OK	50.479	20.3944	-1.30751	-4.12605	5e-05	0.000677386	coding	/
AUR62008424-RA	0h	2h	OK	15.0019	6.79914	-1.14172	-3.1623	5e-05	0.000677386	coding	/
AUR62008434-RA	0h	2h	OK	9.18194	34.8972	1.92624	5.64017	5e-05	0.000677386	coding	/
AUR62008448-RA	0h	2h	OK	4.37219	9.18325	1.07065	2.85141	5e-05	0.000677386	coding	/
AUR62008467-RA	0h	2h	OK	3.12223	0.320269	-3.28522	-5.1697	5e-05	0.000677386	coding	/
AUR62008473-RA	0h	2h	OK	11.2658	4.11371	-1.45344	-1.9397	0.0033	0.0259189	coding	/
AUR62008474-RA	0h	2h	OK	0.652797	6.34855	3.28172	4.30185	5e-05	0.000677386	coding	/
AUR62008481-RA	0h	2h	OK	2.81321	6.37639	1.18052	3.16976	5e-05	0.000677386	coding	/
AUR62008649-RA	0h	2h	OK	2.35901	9.27278	1.97482	5.29314	5e-05	0.000677386	coding	/
AUR62008665-RA	0h	2h	OK	2.67142	6.78288	1.34429	2.17071	0.0005	0.00533502	coding	/
AUR62008681-RA	0h	2h	OK	462.311	1055.52	1.19103	4.10892	5e-05	0.000677386	noncoding	LncRNA
AUR62008710-RA	0h	2h	OK	3.67948	0	#NAME?	#NAME?	5e-05	0.000677386	coding	/
AUR62008721-RA	0h	2h	OK	1.43936	79.1287	5.7807	7.75468	5e-05	0.000677386	coding	/
AUR62008723-RA	0h	2h	OK	67.6354	200.484	1.56764	4.48663	5e-05	0.000677386	coding	/
AUR62008724-RA	0h	2h	OK	182.762	1017.96	2.47764	3.90471	5e-05	0.000677386	coding	/
AUR62008727-RA	0h	2h	OK	684.025	1582.69	1.21026	2.48828	0.0002	0.00238948	coding	/
AUR62008734-RA	0h	2h	OK	13.8303	3.24813	-2.09015	-5.50694	5e-05	0.000677386	coding	/
AUR62008738-RA	0h	2h	OK	26.5736	9.24214	-1.5237	-2.53971	5e-05	0.000677386	coding	/
AUR62008746-RA	0h	2h	OK	6.06285	2.71904	-1.1569	-2.50115	5e-05	0.000677386	coding	/
AUR62008765-RA	0h	2h	OK	1.76116	10.938	2.63475	3.81835	5e-05	0.000677386	noncoding	LncRNA
AUR62008779-RA	0h	2h	OK	1.12803	2.98985	1.40627	3.30396	5e-05	0.000677386	coding	/
AUR62008809-RA	0h	2h	OK	11.14	4.66299	-1.25642	-3.47479	5e-05	0.000677386	coding	/
AUR62008876-RA	0h	2h	OK	11.0342	4.96972	-1.15074	-2.66483	5e-05	0.000677386	coding	/
AUR62008879-RA	0h	2h	OK	3.88066	14.0657	1.85781	4.14501	5e-05	0.000677386	coding	/
AUR62008884-RA	0h	2h	OK	5.08665	31.0503	2.60982	7.53781	5e-05	0.000677386	coding	/
AUR62008885-RA	0h	2h	OK	7.82712	3.83882	-1.02782	-2.65004	5e-05	0.000677386	coding	/
AUR62008905-RA	0h	2h	OK	24.484	57.7318	1.23753	3.83401	5e-05	0.000677386	coding	/
AUR62008927-RA	0h	2h	OK	4.31697	12.2937	1.50983	4.18239	5e-05	0.000677386	coding	/
AUR62008963-RA	0h	2h	OK	20.2296	733.153	5.17957	16.0385	5e-05	0.000677386	coding	/
AUR62008988-RA	0h	2h	OK	5.75292	0.758025	-2.92398	-4.99755	5e-05	0.000677386	coding	/
AUR62009016-RA	0h	2h	OK	9.48106	4.36697	-1.11842	-2.78281	5e-05	0.000677386	coding	/
AUR62009032-RA	0h	2h	OK	0.544234	27.9499	5.68247	8.3668	5e-05	0.000677386	coding	/
AUR62009092-RA	0h	2h	OK	8.61614	3.70642	-1.21702	-3.4212	5e-05	0.000677386	coding	/
AUR62009105-RA	0h	2h	OK	2.11326	5.47359	1.37302	3.56456	5e-05	0.000677386	coding	/
AUR62009154-RA	0h	2h	OK	18.8283	40.3621	1.1001	3.32462	5e-05	0.000677386	coding	/
AUR62009163-RA	0h	2h	OK	12.7708	29.5891	1.21222	3.69409	5e-05	0.000677386	coding	/
AUR62009209-RA	0h	2h	OK	14.6038	36.3188	1.31437	2.05197	0.0003	0.00339802	noncoding	LncRNA
AUR62009228-RA	0h	2h	OK	2.02999	21.0138	3.37179	9.16433	5e-05	0.000677386	coding	/
AUR62009230-RA	0h	2h	OK	11.2786	3.06094	-1.88155	-4.70353	5e-05	0.000677386	coding	/
AUR62009231-RA	0h	2h	OK	1.99737	0.319242	-2.64538	-3.84002	5e-05	0.000677386	coding	/
AUR62009235-RA	0h	2h	OK	7.01946	74.3644	3.40518	10.7364	5e-05	0.000677386	coding	/
AUR62009261-RA	0h	2h	OK	8.93823	2.1608	-2.04842	-5.48435	5e-05	0.000677386	coding	/
AUR62009297-RA	0h	2h	OK	350.493	54.4733	-2.68576	-9.00966	5e-05	0.000677386	coding	/
AUR62009301-RA	0h	2h	OK	8.06142	56.209	2.80169	8.84194	5e-05	0.000677386	coding	/
AUR62009310-RA	0h	2h	OK	1.94774	4.19215	1.10589	2.54396	5e-05	0.000677386	coding	/
AUR62009317-RA	0h	2h	OK	13.8272	5.56725	-1.31247	-2.29223	0.00025	0.00289824	coding	/
AUR62009319-RA	0h	2h	OK	5.6659	1.70393	-1.73344	-2.32582	0.0002	0.00238948	coding	/
AUR62009354-RA	0h	2h	OK	13.1325	1.28951	-3.34824	-4.70761	5e-05	0.000677386	coding	/
AUR62009366-RA	0h	2h	OK	9.21265	23.5661	1.35502	3.38936	5e-05	0.000677386	coding	/
AUR62009370-RA	0h	2h	OK	2.35387	9.61103	2.02966	4.55693	5e-05	0.000677386	coding	/
AUR62009383-RA	0h	2h	OK	10.1941	2.4472	-2.05853	-4.31722	5e-05	0.000677386	coding	/
AUR62009410-RA	0h	2h	OK	3.37584	1.44494	-1.22424	-1.99748	0.0019	0.0164993	coding	/
AUR62009430-RA	0h	2h	OK	6.8508	3.34506	-1.03424	-2.30843	0.00015	0.00185128	coding	/
AUR62009433-RA	0h	2h	OK	1.94108	12.3426	2.66872	6.28139	5e-05	0.000677386	coding	/
AUR62009451-RA	0h	2h	OK	2.65119	0.592051	-2.16285	-2.68788	0.0002	0.00238948	coding	/
AUR62009478-RA	0h	2h	OK	33.025	15.6891	-1.07379	-2.71876	5e-05	0.000677386	coding	/
AUR62009489-RA	0h	2h	OK	27.8175	73.7548	1.40675	4.71513	5e-05	0.000677386	coding	/
AUR62009516-RA	0h	2h	OK	14.4849	6.99449	-1.05026	-2.81706	5e-05	0.000677386	coding	/
AUR62009523-RA	0h	2h	OK	14.7255	6.09827	-1.27185	-3.30258	5e-05	0.000677386	coding	/
AUR62009545-RA	0h	2h	OK	2.77935	8.24728	1.56917	2.28531	0.0012	0.0112748	coding	/
AUR62009562-RA	0h	2h	OK	2.75566	1.22516	-1.16943	-1.83303	0.0027	0.021981	coding	/
AUR62009574-RA	0h	2h	OK	1748.77	404.256	-2.113	-7.10805	5e-05	0.000677386	noncoding	LncRNA
AUR62009577-RA	0h	2h	OK	3.7366	10.5433	1.49653	3.66643	5e-05	0.000677386	coding	/
AUR62009583-RA	0h	2h	OK	10.9203	5.16897	-1.07906	-2.86995	5e-05	0.000677386	coding	/
AUR62009628-RA	0h	2h	OK	1723.72	842.508	-1.03276	-3.18474	5e-05	0.000677386	coding	/
AUR62009691-RA	0h	2h	OK	2.06088	0.753746	-1.45111	-1.75093	0.00705	0.0479284	coding	/
AUR62009692-RA	0h	2h	OK	18.8066	9.36144	-1.00644	-2.70162	5e-05	0.000677386	coding	/
AUR62009702-RA	0h	2h	OK	2.91976	8.93024	1.61285	2.96591	5e-05	0.000677386	coding	/
AUR62009703-RA	0h	2h	OK	3.3857	10.5838	1.64433	1.91639	0.00365	0.0281426	coding	/
AUR62009706-RA	0h	2h	OK	21.257	53.0849	1.32036	3.94553	5e-05	0.000677386	coding	/
AUR62009710-RA	0h	2h	OK	6.17806	21.1186	1.77329	3.36335	5e-05	0.000677386	coding	/
AUR62009723-RA	0h	2h	OK	5.0193	60.7689	3.59777	8.8482	5e-05	0.000677386	coding	/
AUR62009738-RA	0h	2h	OK	13.6568	1.78253	-2.93762	-3.63015	5e-05	0.000677386	coding	/
AUR62009739-RA	0h	2h	OK	59.8562	222.925	1.89698	6.56345	5e-05	0.000677386	coding	/
AUR62009740-RA	0h	2h	OK	18.884	1.758	-3.42515	-6.25227	5e-05	0.000677386	coding	/
AUR62009746-RA	0h	2h	OK	12.393	5.29565	-1.22665	-3.60199	5e-05	0.000677386	coding	/
AUR62009753-RA	0h	2h	OK	8.34263	85.4371	3.35629	9.25603	5e-05	0.000677386	coding	/
AUR62009757-RA	0h	2h	OK	378.454	100.759	-1.90921	-6.43824	5e-05	0.000677386	coding	/
AUR62009758-RA	0h	2h	OK	31.861	4.33679	-2.87709	-5.03899	5e-05	0.000677386	coding	/
AUR62009771-RA	0h	2h	OK	2.29392	0.575865	-1.99401	-2.00954	0.00525	0.0379416	coding	/
AUR62009790-RA	0h	2h	OK	3.52171	9.13115	1.37452	2.87021	5e-05	0.000677386	coding	/
AUR62009825-RA	0h	2h	OK	3.88616	1.59161	-1.28786	-1.88094	0.0017	0.0150558	coding	/
AUR62009874-RA	0h	2h	OK	406.002	62.7283	-2.6943	-6.91102	5e-05	0.000677386	coding	/
AUR62009875-RA	0h	2h	OK	150.395	28.5402	-2.39769	-3.42298	5e-05	0.000677386	coding	/
AUR62009877-RA	0h	2h	OK	383.678	68.4483	-2.48681	-5.24403	5e-05	0.000677386	coding	/
AUR62009884-RA	0h	2h	OK	41.5175	11.1914	-1.89133	-5.59528	5e-05	0.000677386	coding	/
AUR62009891-RA	0h	2h	OK	2.05192	4.42682	1.1093	1.93949	0.00255	0.0210301	coding	/
AUR62009895-RA	0h	2h	OK	1.05211	6.18699	2.55595	4.75547	5e-05	0.000677386	coding	/
AUR62009919-RA	0h	2h	OK	0.896671	255.333	8.15359	11.9299	5e-05	0.000677386	coding	/
AUR62009949-RA	0h	2h	OK	2.52105	1.11901	-1.1718	-1.709	0.0051	0.0370265	coding	/
AUR62009951-RA	0h	2h	OK	29.4425	8.79375	-1.74335	-5.54146	5e-05	0.000677386	coding	/
AUR62009981-RA	0h	2h	OK	31.841	82.4556	1.37273	4.77746	5e-05	0.000677386	coding	/
AUR62010009-RA	0h	2h	OK	22.0462	59.9245	1.44261	2.69862	5e-05	0.000677386	coding	/
AUR62010023-RA	0h	2h	OK	3.17023	33.0271	3.38099	6.80633	5e-05	0.000677386	coding	/
AUR62010084-RA	0h	2h	OK	15.0639	6.74531	-1.15914	-3.02779	5e-05	0.000677386	coding	/
AUR62010119-RA	0h	2h	OK	6.68967	2.36617	-1.49938	-2.95328	5e-05	0.000677386	coding	/
AUR62010155-RA	0h	2h	OK	57.0019	165.046	1.53379	2.67378	5e-05	0.000677386	coding	/
AUR62010247-RA	0h	2h	OK	6.95861	2.34649	-1.5683	-2.47473	0.00055	0.00579049	coding	/
AUR62010257-RA	0h	2h	OK	2.94565	8.97105	1.60669	2.35648	0.0001	0.00128341	coding	/
AUR62010320-RA	0h	2h	OK	38.2626	7.51309	-2.34846	-4.80685	5e-05	0.000677386	coding	/
AUR62010474-RA	0h	2h	OK	99.2669	14.3916	-2.78608	-8.06233	5e-05	0.000677386	coding	/
AUR62010477-RA	0h	2h	OK	4.42955	1.51251	-1.55022	-1.80609	0.00675	0.046281	coding	/
AUR62010515-RA	0h	2h	OK	8.11354	3.03165	-1.42023	-3.51829	5e-05	0.000677386	coding	/
AUR62010519-RA	0h	2h	OK	29.7342	12.2146	-1.28352	-3.36509	5e-05	0.000677386	coding	/
AUR62010540-RA	0h	2h	OK	3.41072	1.43938	-1.24463	-2.37469	0.00025	0.00289824	coding	/
AUR62010587-RA	0h	2h	OK	7.07116	17.8807	1.33838	2.33847	0.0005	0.00533502	coding	/
AUR62010592-RA	0h	2h	OK	5.04211	1.29016	-1.96648	-3.23608	5e-05	0.000677386	coding	/
AUR62010630-RA	0h	2h	OK	11.5358	39.366	1.77083	5.45668	5e-05	0.000677386	coding	/
AUR62010642-RA	0h	2h	OK	8.31727	3.30891	-1.32976	-2.92447	5e-05	0.000677386	coding	/
AUR62010653-RA	0h	2h	OK	2.29885	13.7502	2.58047	4.738	5e-05	0.000677386	coding	/
AUR62010677-RA	0h	2h	OK	4.77048	24.952	2.38695	5.12604	5e-05	0.000677386	coding	/
AUR62010685-RA	0h	2h	OK	4.43428	2.07244	-1.09737	-1.95154	0.0014	0.012806	coding	/
AUR62010686-RA	0h	2h	OK	1.39035	0.2478	-2.4882	-3.81213	5e-05	0.000677386	coding	/
AUR62010746-RA	0h	2h	OK	3.27402	32.0966	3.29328	7.43477	5e-05	0.000677386	coding	/
AUR62010762-RA	0h	2h	OK	3.97247	39.4655	3.31248	6.10001	5e-05	0.000677386	coding	/
AUR62010836-RA	0h	2h	OK	2.51303	6.38487	1.34523	3.27367	5e-05	0.000677386	coding	/
AUR62010839-RA	0h	2h	OK	4.64579	9.82458	1.08047	2.7891	5e-05	0.000677386	coding	/
AUR62010854-RA	0h	2h	OK	4.38038	11.2299	1.35821	2.60366	0.0001	0.00128341	coding	/
AUR62010858-RA	0h	2h	OK	2.08186	5.51894	1.40652	2.15742	0.00035	0.00390194	coding	/
AUR62010870-RA	0h	2h	OK	927.259	180.56	-2.3605	-7.02288	5e-05	0.000677386	coding	/
AUR62010913-RA	0h	2h	OK	4.19717	22.2764	2.40803	5.95156	5e-05	0.000677386	coding	/
AUR62010916-RA	0h	2h	OK	0.468781	1.67082	1.83357	2.74355	0.00015	0.00185128	noncoding	LncRNA
AUR62010938-RA	0h	2h	OK	20.4217	4.84945	-2.07421	-5.06331	5e-05	0.000677386	coding	/
AUR62010940-RA	0h	2h	OK	4.43225	10.2169	1.20485	2.5889	5e-05	0.000677386	coding	/
AUR62010963-RA	0h	2h	OK	5.04188	1.99485	-1.33768	-2.41352	0.0001	0.00128341	coding	/
AUR62010966-RA	0h	2h	OK	2.62904	12.8767	2.29215	5.75724	5e-05	0.000677386	coding	/
AUR62011006-RA	0h	2h	OK	1.24384	3.70347	1.57408	1.7878	0.0047	0.0345856	coding	/
AUR62011012-RA	0h	2h	OK	4.96515	23.5653	2.24675	6.76807	5e-05	0.000677386	coding	/
AUR62011024-RA	0h	2h	OK	13.7976	2.45572	-2.4902	-3.23208	0.00015	0.00185128	coding	/
AUR62011047-RA	0h	2h	OK	31.2	10.277	-1.60213	-5.15763	5e-05	0.000677386	coding	/
AUR62011134-RA	0h	2h	OK	7.16031	19.7735	1.46547	3.82182	5e-05	0.000677386	coding	/
AUR62011140-RA	0h	2h	OK	11.644	29.545	1.34332	3.15266	5e-05	0.000677386	coding	/
AUR62011153-RA	0h	2h	OK	134.041	20.2359	-2.72768	-5.95209	5e-05	0.000677386	coding	/
AUR62011155-RA	0h	2h	OK	415.452	951.902	1.19613	4.02193	5e-05	0.000677386	coding	/
AUR62011175-RA	0h	2h	OK	7.9385	16.404	1.04711	3.28688	5e-05	0.000677386	coding	/
AUR62011202-RA	0h	2h	OK	7.89208	3.69983	-1.09295	-3.14844	5e-05	0.000677386	coding	/
AUR62011205-RA	0h	2h	OK	2.61091	0.761082	-1.77843	-2.46716	0.00065	0.00669571	coding	/
AUR62011210-RA	0h	2h	OK	3.1721	58.9463	4.21589	7.97095	5e-05	0.000677386	coding	/
AUR62011259-RA	0h	2h	OK	43.4782	101.467	1.22265	4.18069	5e-05	0.000677386	coding	/
AUR62011260-RA	0h	2h	OK	15.4316	33.017	1.09732	3.22848	5e-05	0.000677386	coding	/
AUR62011270-RA	0h	2h	OK	6.8412	2.68692	-1.3483	-3.59222	5e-05	0.000677386	coding	/
AUR62011279-RA	0h	2h	OK	3.09649	6.6029	1.09247	1.72409	0.00545	0.0391332	coding	/
AUR62011300-RA	0h	2h	OK	1.2536	0.24523	-2.35387	-3.23442	5e-05	0.000677386	coding	/
AUR62011326-RA	0h	2h	OK	6.62687	17.8256	1.42755	3.92788	5e-05	0.000677386	coding	/
AUR62011344-RA	0h	2h	OK	5.07302	0.889473	-2.51182	-2.49238	0.0019	0.0164993	coding	/
AUR62011352-RA	0h	2h	OK	8.11069	3.66312	-1.14675	-1.75074	0.00545	0.0391332	coding	/
AUR62011355-RA	0h	2h	OK	2.41015	1.10172	-1.12937	-1.71904	0.0059	0.0416098	coding	/
AUR62011380-RA	0h	2h	OK	397.172	125.956	-1.65684	-5.74206	5e-05	0.000677386	coding	/
AUR62011395-RA	0h	2h	OK	1.05294	25.3121	4.58733	10.0406	5e-05	0.000677386	coding	/
AUR62011396-RA	0h	2h	OK	1.20251	6.28973	2.38695	2.77993	0.00125	0.0116662	coding	/
AUR62011402-RA	0h	2h	OK	9.68661	34.523	1.8335	5.59248	5e-05	0.000677386	coding	/
AUR62011410-RA	0h	2h	OK	3.04291	15.7014	2.36737	4.70341	5e-05	0.000677386	coding	/
AUR62011431-RA	0h	2h	OK	7.52812	48.2467	2.68007	6.76679	5e-05	0.000677386	coding	/
AUR62011479-RA	0h	2h	OK	2.96856	1.01062	-1.55452	-3.41383	5e-05	0.000677386	coding	/
AUR62011500-RA	0h	2h	OK	2.6567	0.292224	-3.18449	-2.68256	0.00605	0.0424933	coding	/
AUR62011523-RA	0h	2h	OK	12.6644	38.1289	1.59011	4.81895	5e-05	0.000677386	coding	/
AUR62011529-RA	0h	2h	OK	3.22547	18.0094	2.48117	2.19582	0.0013	0.0120581	coding	/
AUR62011533-RA	0h	2h	OK	2.95615	1.19801	-1.30308	-2.10111	0.00115	0.0109054	coding	/
AUR62011562-RA	0h	2h	OK	7.34752	2.87137	-1.35552	-2.75462	5e-05	0.000677386	coding	/
AUR62011571-RA	0h	2h	OK	2.87663	12.8881	2.16359	2.93924	0.001	0.00969691	coding	/
AUR62011583-RA	0h	2h	OK	3.83899	1.29585	-1.56683	-3.32301	5e-05	0.000677386	coding	/
AUR62011644-RA	0h	2h	OK	8.46186	23.1087	1.44939	3.83293	5e-05	0.000677386	coding	/
AUR62011710-RA	0h	2h	OK	56.9636	5.16652	-3.46278	-7.07823	5e-05	0.000677386	coding	/
AUR62011717-RA	0h	2h	OK	3.0216	9.30503	1.6227	1.85086	0.00725	0.0490995	coding	/
AUR62011745-RA	0h	2h	OK	40.4597	10.2084	-1.98673	-6.60906	5e-05	0.000677386	coding	/
AUR62011747-RA	0h	2h	OK	23.248	5.66729	-2.03638	-5.69585	5e-05	0.000677386	coding	/
AUR62011753-RA	0h	2h	OK	5.9317	32.5275	2.45514	5.88787	5e-05	0.000677386	coding	/
AUR62011819-RA	0h	2h	OK	1.63849	4.25721	1.37754	2.13418	0.00125	0.0116662	coding	/
AUR62011824-RA	0h	2h	OK	1.5351	3.97007	1.37083	1.8475	0.0037	0.0284662	coding	/
AUR62011878-RA	0h	2h	OK	4.64219	15.6843	1.75644	3.78294	5e-05	0.000677386	coding	/
AUR62011892-RA	0h	2h	OK	1.48853	3.30608	1.15123	2.00193	0.0007	0.00713988	coding	/
AUR62011912-RA	0h	2h	OK	2.9294	60.0145	4.35663	7.77231	5e-05	0.000677386	coding	/
AUR62011938-RA	0h	2h	OK	24.5302	6.94807	-1.81987	-5.36733	5e-05	0.000677386	coding	/
AUR62011943-RA	0h	2h	OK	10.4395	24.1628	1.21074	1.65763	0.00415	0.0312687	coding	/
AUR62011973-RA	0h	2h	OK	1.44041	5.31636	1.88396	3.28173	5e-05	0.000677386	coding	/
AUR62011978-RA	0h	2h	OK	44.0015	111.537	1.3419	3.10352	5e-05	0.000677386	coding	/
AUR62011983-RA	0h	2h	OK	4.40836	13.7866	1.64496	2.5751	5e-05	0.000677386	coding	/
AUR62012003-RA	0h	2h	OK	1.81311	0.359138	-2.33586	-2.64039	0.00065	0.00669571	coding	/
AUR62012026-RA	0h	2h	OK	6.57049	0.928966	-2.8223	-3.12421	0.0014	0.012806	coding	/
AUR62012059-RA	0h	2h	OK	2.61099	0	#NAME?	#NAME?	5e-05	0.000677386	coding	/
AUR62012084-RA	0h	2h	OK	17.0577	62.257	1.86781	5.90975	5e-05	0.000677386	coding	/
AUR62012085-RA	0h	2h	OK	1492.16	321.3	-2.21541	-5.06434	5e-05	0.000677386	coding	/
AUR62012090-RA	0h	2h	OK	2.78535	14.1252	2.34234	3.89501	5e-05	0.000677386	coding	/
AUR62012104-RA	0h	2h	OK	79.151	29.3311	-1.43217	-4.62923	5e-05	0.000677386	coding	/
AUR62012116-RA	0h	2h	OK	3.93489	1.09794	-1.84153	-1.87324	0.00555	0.0396667	coding	/
AUR62012120-RA	0h	2h	OK	3.8544	17.9121	2.21636	3.14877	5e-05	0.000677386	coding	/
AUR62012136-RA	0h	2h	OK	30.021	115.768	1.94719	6.59466	5e-05	0.000677386	coding	/
AUR62012158-RA	0h	2h	OK	2.82399	1.16102	-1.28235	-2.34876	0.0001	0.00128341	coding	/
AUR62012164-RA	0h	2h	OK	210.869	104.391	-1.01434	-3.2913	5e-05	0.000677386	coding	/
AUR62012165-RA	0h	2h	OK	5.77706	2.39379	-1.27104	-3.1581	5e-05	0.000677386	coding	/
AUR62012175-RA	0h	2h	OK	2.19316	25.8208	3.55745	4.6783	5e-05	0.000677386	coding	/
AUR62012224-RA	0h	2h	OK	4.01896	10.5437	1.39149	3.63379	5e-05	0.000677386	coding	/
AUR62012240-RA	0h	2h	OK	15.2784	35.9431	1.23423	2.32925	0.00015	0.00185128	coding	/
AUR62012249-RA	0h	2h	OK	5.20965	42.0093	3.01145	9.16223	5e-05	0.000677386	coding	/
AUR62012253-RA	0h	2h	OK	0.744411	2.80539	1.91403	2.14732	0.00285	0.022966	coding	/
AUR62012258-RA	0h	2h	OK	9.3567	180.407	4.26911	11.8983	5e-05	0.000677386	coding	/
AUR62012262-RA	0h	2h	OK	23.4915	112.893	2.26474	7.7359	5e-05	0.000677386	coding	/
AUR62012318-RA	0h	2h	OK	2.04641	4.90578	1.26139	2.58683	5e-05	0.000677386	coding	/
AUR62012332-RA	0h	2h	OK	2.60496	14.2064	2.44721	2.61318	0.00095	0.00927935	coding	/
AUR62012336-RA	0h	2h	OK	7.22846	3.05655	-1.24179	-2.12333	0.0008	0.00801318	coding	/
AUR62012339-RA	0h	2h	OK	30.1253	7.29874	-2.04525	-5.52711	5e-05	0.000677386	coding	/
AUR62012340-RA	0h	2h	OK	6.03567	2.63734	-1.19443	-2.81147	5e-05	0.000677386	coding	/
AUR62012344-RA	0h	2h	OK	13.996	97.3215	2.79774	8.66075	5e-05	0.000677386	coding	/
AUR62012346-RA	0h	2h	OK	2.87478	0.826008	-1.79923	-2.80301	0.0001	0.00128341	coding	/
AUR62012440-RA	0h	2h	OK	7.50307	15.1896	1.01753	2.88668	5e-05	0.000677386	coding	/
AUR62012456-RA	0h	2h	OK	11.1501	23.359	1.06692	3.02543	5e-05	0.000677386	coding	/
AUR62012478-RA	0h	2h	OK	0.246859	4.47006	4.17853	3.77613	0.0053	0.0382341	coding	/
AUR62012484-RA	0h	2h	OK	2.01686	9.99648	2.30931	2.32	0.00125	0.0116662	coding	/
AUR62012533-RA	0h	2h	OK	1.83308	5.92592	1.69277	4.30417	5e-05	0.000677386	coding	/
AUR62012591-RA	0h	2h	OK	0.846181	6.11458	2.85321	4.86837	5e-05	0.000677386	coding	/
AUR62012604-RA	0h	2h	OK	9.07086	1.24442	-2.86576	-4.90318	5e-05	0.000677386	coding	/
AUR62012617-RA	0h	2h	OK	1.30359	8.57088	2.71695	5.06378	5e-05	0.000677386	coding	/
AUR62012633-RA	0h	2h	OK	0.368916	1.91247	2.37407	3.38553	5e-05	0.000677386	coding	/
AUR62012640-RA	0h	2h	OK	2.28463	0.641261	-1.83298	-2.42487	0.0017	0.0150558	coding	/
AUR62012652-RA	0h	2h	OK	59.1604	13.1587	-2.16862	-6.46274	5e-05	0.000677386	coding	/
AUR62012669-RA	0h	2h	OK	0.612235	1.36459	1.15631	1.73283	0.0061	0.0427796	coding	/
AUR62012840-RA	0h	2h	OK	33.7584	8.51029	-1.98797	-5.76364	5e-05	0.000677386	coding	/
AUR62012880-RA	0h	2h	OK	4.30168	1.56981	-1.45431	-2.20368	0.0007	0.00713988	coding	/
AUR62012903-RA	0h	2h	OK	16.8381	1.2245	-3.78146	-4.02579	0.0003	0.00339802	coding	/
AUR62012930-RA	0h	2h	OK	12.993	3.55174	-1.87113	-2.94451	0.0008	0.00801318	coding	/
AUR62012931-RA	0h	2h	OK	12.3115	1.22058	-3.33437	-4.76456	5e-05	0.000677386	coding	/
AUR62012939-RA	0h	2h	OK	2.03266	6.55611	1.68947	2.45762	0.00035	0.00390194	coding	/
AUR62012942-RA	0h	2h	OK	2.38541	1.0241	-1.21988	-1.88573	0.0028	0.0226571	coding	/
AUR62012950-RA	0h	2h	OK	9.62181	37.1948	1.95072	5.02414	5e-05	0.000677386	coding	/
AUR62012951-RA	0h	2h	OK	2.03655	11.9372	2.55127	4.61911	5e-05	0.000677386	coding	/
AUR62012970-RA	0h	2h	OK	32.3935	104.731	1.69291	5.89008	5e-05	0.000677386	coding	/
AUR62012984-RA	0h	2h	OK	214.696	71.6834	-1.58258	-5.50541	5e-05	0.000677386	coding	/
AUR62012999-RA	0h	2h	OK	48.1853	21.4212	-1.16955	-3.50886	5e-05	0.000677386	coding	/
AUR62013013-RA	0h	2h	OK	2.73644	13.4002	2.29188	3.16644	5e-05	0.000677386	coding	/
AUR62013055-RA	0h	2h	OK	10.8036	56.6426	2.39038	7.43084	5e-05	0.000677386	coding	/
AUR62013155-RA	0h	2h	OK	29.7323	70.4969	1.24553	4.31721	5e-05	0.000677386	coding	/
AUR62013177-RA	0h	2h	OK	29.6462	13.5785	-1.12652	-1.91435	0.00165	0.0146778	coding	/
AUR62013199-RA	0h	2h	OK	114.149	242.58	1.08754	3.75352	5e-05	0.000677386	coding	/
AUR62013225-RA	0h	2h	OK	233.659	481.192	1.04221	3.5382	5e-05	0.000677386	coding	/
AUR62013244-RA	0h	2h	OK	11.0288	1.69677	-2.70042	-4.33271	5e-05	0.000677386	coding	/
AUR62013261-RA	0h	2h	OK	6.22057	2.05151	-1.60036	-3.64889	5e-05	0.000677386	coding	/
AUR62013271-RA	0h	2h	OK	4.11739	1.27599	-1.69011	-2.71666	5e-05	0.000677386	coding	/
AUR62013275-RA	0h	2h	OK	3.88272	1.31456	-1.56249	-3.40893	5e-05	0.000677386	coding	/
AUR62013277-RA	0h	2h	OK	7.84813	142.755	4.18505	8.26527	5e-05	0.000677386	coding	/
AUR62013318-RA	0h	2h	OK	0.384434	9.87008	4.68225	4.20695	0.00055	0.00579049	coding	/
AUR62013332-RA	0h	2h	OK	248.004	674.9	1.44431	3.88693	5e-05	0.000677386	coding	/
AUR62013333-RA	0h	2h	OK	2.99439	0.910738	-1.71715	-1.97435	0.00315	0.0249164	coding	/
AUR62013334-RA	0h	2h	OK	104.918	16.181	-2.69689	-7.30138	5e-05	0.000677386	coding	/
AUR62013350-RA	0h	2h	OK	31.5585	65.6739	1.05729	3.7197	5e-05	0.000677386	coding	/
AUR62013354-RA	0h	2h	OK	48.1607	14.9697	-1.68581	-2.43299	5e-05	0.000677386	noncoding	LncRNA
AUR62013366-RA	0h	2h	OK	4.43626	2.14683	-1.04714	-2.45463	0.0001	0.00128341	coding	/
AUR62013380-RA	0h	2h	OK	2.03394	6.225	1.61379	3.69685	5e-05	0.000677386	coding	/
AUR62013394-RA	0h	2h	OK	2.93335	6.15072	1.06821	2.29415	0.0002	0.00238948	coding	/
AUR62013500-RA	0h	2h	OK	3.417	7.64247	1.16131	2.56436	5e-05	0.000677386	coding	/
AUR62013506-RA	0h	2h	OK	6.25595	1.5713	-1.99327	-3.28806	5e-05	0.000677386	coding	/
AUR62013534-RA	0h	2h	OK	4.47469	31.5397	2.81731	4.30248	5e-05	0.000677386	coding	/
AUR62013551-RA	0h	2h	OK	9.48059	35.6318	1.91012	6.25685	5e-05	0.000677386	coding	/
AUR62013567-RA	0h	2h	OK	3.47206	0	#NAME?	#NAME?	5e-05	0.000677386	coding	/
AUR62013591-RA	0h	2h	OK	0.323671	2.86037	3.1436	2.8128	0.00185	0.0161467	coding	/
AUR62013592-RA	0h	2h	OK	35.8703	17.132	-1.0661	-3.08131	5e-05	0.000677386	coding	/
AUR62013692-RA	0h	2h	OK	10.2778	3.97925	-1.36897	-3.22117	5e-05	0.000677386	coding	/
AUR62013708-RA	0h	2h	OK	2.95703	0.885648	-1.73934	-2.34111	0.0011	0.0104891	coding	/
AUR62013720-RA	0h	2h	OK	62.0744	14.8147	-2.06697	-4.48402	5e-05	0.000677386	coding	/
AUR62013783-RA	0h	2h	OK	57.446	23.4476	-1.29277	-2.81029	5e-05	0.000677386	coding	/
AUR62013784-RA	0h	2h	OK	29.0494	14.3243	-1.02005	-2.77024	5e-05	0.000677386	coding	/
AUR62013850-RA	0h	2h	OK	5.92999	0.902049	-2.71675	-4.04084	5e-05	0.000677386	coding	/
AUR62013893-RA	0h	2h	OK	2.66258	1.32456	-1.00731	-1.79894	0.00235	0.0196581	coding	/
AUR62013906-RA	0h	2h	OK	16.452	50.414	1.61556	3.6642	5e-05	0.000677386	noncoding	LncRNA
AUR62013908-RA	0h	2h	OK	6.77333	17.2523	1.34885	3.33847	5e-05	0.000677386	coding	/
AUR62013936-RA	0h	2h	OK	34.0919	15.93	-1.09768	-3.0566	5e-05	0.000677386	coding	/
AUR62013977-RA	0h	2h	OK	228.066	41.2402	-2.46733	-8.35961	5e-05	0.000677386	coding	/
AUR62014017-RA	0h	2h	OK	22.1048	48.0952	1.12153	2.57726	5e-05	0.000677386	coding	/
AUR62014019-RA	0h	2h	OK	3.62601	0.716727	-2.33889	-3.08814	5e-05	0.000677386	coding	/
AUR62014053-RA	0h	2h	OK	38.9746	118.754	1.60737	5.59645	5e-05	0.000677386	coding	/
AUR62014090-RA	0h	2h	OK	0.953956	2.26543	1.24779	2.84585	5e-05	0.000677386	coding	/
AUR62014139-RA	0h	2h	OK	4.50686	35.3702	2.97234	8.44598	5e-05	0.000677386	coding	/
AUR62014163-RA	0h	2h	OK	47.2367	16.1109	-1.55187	-4.53125	5e-05	0.000677386	coding	/
AUR62014169-RA	0h	2h	OK	19.9695	4.1956	-2.25085	-5.11713	5e-05	0.000677386	coding	/
AUR62014190-RA	0h	2h	OK	40.9031	168.3	2.04076	6.97852	5e-05	0.000677386	noncoding	LncRNA
AUR62014204-RA	0h	2h	OK	2.64181	28.8326	3.4481	6.8786	5e-05	0.000677386	coding	/
AUR62014207-RA	0h	2h	OK	152.077	434.121	1.51329	5.27618	5e-05	0.000677386	coding	/
AUR62014208-RA	0h	2h	OK	0	2.03072	inf	#NAME?	5e-05	0.000677386	coding	/
AUR62014322-RA	0h	2h	OK	2.68348	5.85098	1.12457	1.89424	0.0031	0.0246082	coding	/
AUR62014390-RA	0h	2h	OK	2.1672	0.848807	-1.35232	-2.03303	0.0016	0.0143007	coding	/
AUR62014406-RA	0h	2h	OK	4.40231	11.5429	1.39067	3.65083	5e-05	0.000677386	coding	/
AUR62014436-RA	0h	2h	OK	11.0132	27.0437	1.29605	3.79276	5e-05	0.000677386	coding	/
AUR62014449-RA	0h	2h	OK	146.265	56.9374	-1.36114	-4.73629	5e-05	0.000677386	coding	/
AUR62014461-RA	0h	2h	OK	3.12836	50.5769	4.015	7.58063	5e-05	0.000677386	coding	/
AUR62014467-RA	0h	2h	OK	3.53398	11.0098	1.63943	4.34762	5e-05	0.000677386	coding	/
AUR62014474-RA	0h	2h	OK	47.6324	22.4285	-1.08661	-3.56193	5e-05	0.000677386	coding	/
AUR62014478-RA	0h	2h	OK	2.69356	10.8121	2.00506	3.3728	5e-05	0.000677386	coding	/
AUR62014490-RA	0h	2h	OK	3.53087	9.74724	1.46497	2.96171	5e-05	0.000677386	coding	/
AUR62014500-RA	0h	2h	OK	22.7162	384.457	4.08103	11.1783	5e-05	0.000677386	coding	/
AUR62014533-RA	0h	2h	OK	74.7934	13.8509	-2.43293	-4.83306	5e-05	0.000677386	coding	/
AUR62014540-RA	0h	2h	OK	8.15591	835.127	6.67801	18.2238	5e-05	0.000677386	coding	/
AUR62014545-RA	0h	2h	OK	3.51695	12.4392	1.8225	2.04396	0.00465	0.0343142	coding	/
AUR62014567-RA	0h	2h	OK	7.79435	1.9257	-2.01704	-2.69599	0.0003	0.00339802	coding	/
AUR62014579-RA	0h	2h	OK	25.1638	10.9031	-1.20662	-1.70729	0.00655	0.0452604	coding	/
AUR62014601-RA	0h	2h	OK	1.01041	4.53311	2.16557	4.99778	5e-05	0.000677386	coding	/
AUR62014636-RA	0h	2h	OK	0.668115	3.25018	2.28235	4.01524	5e-05	0.000677386	coding	/
AUR62014646-RA	0h	2h	OK	0.607031	8.20199	3.75613	3.52904	0.0028	0.0226571	coding	/
AUR62014657-RA	0h	2h	OK	13.3667	55.7633	2.06068	3.12206	5e-05	0.000677386	coding	/
AUR62014662-RA	0h	2h	OK	3.20806	12.7337	1.98888	4.30968	5e-05	0.000677386	coding	/
AUR62014672-RA	0h	2h	OK	10.9553	22.7629	1.05505	3.03761	5e-05	0.000677386	coding	/
AUR62014702-RA	0h	2h	OK	0.614123	5.19708	3.0811	3.30266	0.0003	0.00339802	coding	/
AUR62014711-RA	0h	2h	OK	1.64882	30.3962	4.20439	3.87133	0.006	0.0422013	coding	/
AUR62014717-RA	0h	2h	OK	6.42604	37.4347	2.54237	7.07164	5e-05	0.000677386	coding	/
AUR62014718-RA	0h	2h	OK	1.94581	8.94124	2.2001	5.18182	5e-05	0.000677386	coding	/
AUR62014724-RA	0h	2h	OK	16.3341	39.5612	1.2762	3.03579	5e-05	0.000677386	coding	/
AUR62014733-RA	0h	2h	OK	377.409	167.616	-1.17097	-3.96272	5e-05	0.000677386	coding	/
AUR62014761-RA	0h	2h	OK	3.68602	11.5502	1.64778	3.20845	5e-05	0.000677386	coding	/
AUR62014794-RA	0h	2h	OK	4.27451	63.1744	3.88551	7.8857	5e-05	0.000677386	coding	/
AUR62014799-RA	0h	2h	OK	3.19781	12.8825	2.01025	4.55385	5e-05	0.000677386	coding	/
AUR62014809-RA	0h	2h	OK	30.3466	6.7639	-2.16561	-6.25603	5e-05	0.000677386	coding	/
AUR62014826-RA	0h	2h	OK	1.61394	9.48917	2.5557	4.72459	5e-05	0.000677386	coding	/
AUR62014851-RA	0h	2h	OK	34.4829	102.152	1.56677	2.56737	0.0006	0.00625561	noncoding	LncRNA
AUR62014859-RA	0h	2h	OK	4.10307	14.2308	1.79424	4.50759	5e-05	0.000677386	coding	/
AUR62014915-RA	0h	2h	OK	2.63397	0.763905	-1.78577	-3.13003	5e-05	0.000677386	coding	/
AUR62014966-RA	0h	2h	OK	66.8118	341.148	2.35222	8.10375	5e-05	0.000677386	coding	/
AUR62015001-RA	0h	2h	OK	305.714	98.174	-1.63877	-5.22958	5e-05	0.000677386	coding	/
AUR62015076-RA	0h	2h	OK	103.888	354.69	1.77153	6.09652	5e-05	0.000677386	coding	/
AUR62015081-RA	0h	2h	OK	6.14974	2.39255	-1.36197	-3.06639	5e-05	0.000677386	coding	/
AUR62015112-RA	0h	2h	OK	1.98716	5.81482	1.54903	3.02348	5e-05	0.000677386	coding	/
AUR62015134-RA	0h	2h	OK	8.60693	1.35	-2.67254	-4.36544	5e-05	0.000677386	coding	/
AUR62015193-RA	0h	2h	OK	4.31022	1.56012	-1.46611	-2.07262	0.00205	0.0175287	coding	/
AUR62015203-RA	0h	2h	OK	15.5137	122.078	2.97619	9.11457	5e-05	0.000677386	coding	/
AUR62015220-RA	0h	2h	OK	3.54037	0.646441	-2.45331	-4.24848	5e-05	0.000677386	coding	/
AUR62015256-RA	0h	2h	OK	288.117	139.365	-1.04779	-3.68938	5e-05	0.000677386	coding	/
AUR62015274-RA	0h	2h	OK	25.1473	5.5839	-2.17106	-3.6381	5e-05	0.000677386	coding	/
AUR62015276-RA	0h	2h	OK	27.6734	11.5802	-1.25683	-3.89671	5e-05	0.000677386	coding	/
AUR62015363-RA	0h	2h	OK	11.2199	1.21652	-3.20523	-6.03769	5e-05	0.000677386	coding	/
AUR62015382-RA	0h	2h	OK	1.27909	2.90943	1.18562	2.49739	0.0002	0.00238948	coding	/
AUR62015421-RA	0h	2h	OK	6.49093	24.8129	1.93459	3.60968	5e-05	0.000677386	coding	/
AUR62015433-RA	0h	2h	OK	12.0351	2.30508	-2.38436	-6.05561	5e-05	0.000677386	coding	/
AUR62015468-RA	0h	2h	OK	28.8958	64.1311	1.15016	3.58899	5e-05	0.000677386	coding	/
AUR62015499-RA	0h	2h	OK	67.3901	22.9624	-1.55326	-5.34268	5e-05	0.000677386	coding	/
AUR62015524-RA	0h	2h	OK	1.13539	2.74478	1.2735	2.09708	0.0011	0.0104891	coding	/
AUR62015542-RA	0h	2h	OK	68.0687	21.4664	-1.66491	-4.37687	5e-05	0.000677386	coding	/
AUR62015561-RA	0h	2h	OK	13.532	3.16534	-2.09594	-3.85899	5e-05	0.000677386	coding	/
AUR62015580-RA	0h	2h	OK	84.7446	15.3921	-2.46093	-7.93243	5e-05	0.000677386	coding	/
AUR62015603-RA	0h	2h	OK	5.50887	19.9677	1.85784	3.24163	5e-05	0.000677386	coding	/
AUR62015615-RA	0h	2h	OK	6.75708	3.22752	-1.06597	-2.93405	5e-05	0.000677386	coding	/
AUR62015629-RA	0h	2h	OK	1.83047	6.02622	1.71904	2.02703	0.0026	0.0213255	noncoding	LncRNA
AUR62015650-RA	0h	2h	OK	22.1618	8.00974	-1.46825	-1.91371	0.00445	0.0331472	coding	/
AUR62015655-RA	0h	2h	OK	31.1397	110.438	1.82641	5.17915	5e-05	0.000677386	coding	/
AUR62015664-RA	0h	2h	OK	68.6729	15.5444	-2.14335	-6.27006	5e-05	0.000677386	coding	/
AUR62015786-RA	0h	2h	OK	3.28075	7.95151	1.2772	1.94675	0.0038	0.0290979	coding	/
AUR62015860-RA	0h	2h	OK	4.74908	1.94304	-1.28933	-2.81283	5e-05	0.000677386	coding	/
AUR62015894-RA	0h	2h	OK	59.2041	27.1994	-1.12212	-2.89931	5e-05	0.000677386	coding	/
AUR62015952-RA	0h	2h	OK	0.285643	1.27493	2.15813	2.25146	0.003	0.0239503	coding	/
AUR62015972-RA	0h	2h	OK	13.3725	2.23096	-2.58354	-2.9831	5e-05	0.000677386	coding	/
AUR62016038-RA	0h	2h	OK	8.11259	3.2359	-1.326	-3.10217	5e-05	0.000677386	coding	/
AUR62016070-RA	0h	2h	OK	9.31577	146.981	3.97981	7.2987	5e-05	0.000677386	coding	/
AUR62016100-RA	0h	2h	OK	523.23	238.096	-1.1359	-3.89	5e-05	0.000677386	coding	/
AUR62016102-RA	0h	2h	OK	18.4387	8.15936	-1.17621	-2.16459	0.0006	0.00625561	coding	/
AUR62016135-RA	0h	2h	OK	3.79282	8.00515	1.07766	2.71309	5e-05	0.000677386	coding	/
AUR62016191-RA	0h	2h	OK	12.2377	5.48861	-1.15682	-2.71876	5e-05	0.000677386	coding	/
AUR62016192-RA	0h	2h	OK	12.4802	5.94799	-1.06917	-2.243	0.00035	0.00390194	coding	/
AUR62016237-RA	0h	2h	OK	8.90712	19.2279	1.11017	2.9453	5e-05	0.000677386	coding	/
AUR62016284-RA	0h	2h	OK	2.49129	0.867406	-1.52211	-2.16112	0.00115	0.0109054	coding	/
AUR62016341-RA	0h	2h	OK	14.7227	51.9186	1.81821	5.22741	5e-05	0.000677386	coding	/
AUR62016365-RA	0h	2h	OK	5.96419	2.04068	-1.54728	-2.27398	0.0004	0.00438463	coding	/
AUR62016366-RA	0h	2h	OK	63.4054	15.7913	-2.00547	-6.27586	5e-05	0.000677386	coding	/
AUR62016414-RA	0h	2h	OK	3.26887	95.0958	4.86252	15.1041	5e-05	0.000677386	coding	/
AUR62016457-RA	0h	2h	OK	0.467577	9.77635	4.38602	4.73066	5e-05	0.000677386	coding	/
AUR62016467-RA	0h	2h	OK	24.5744	9.85275	-1.31856	-2.24524	0.0003	0.00339802	coding	/
AUR62016520-RA	0h	2h	OK	56.0923	17.164	-1.70842	-4.00749	5e-05	0.000677386	coding	/
AUR62016591-RA	0h	2h	OK	40.6744	17.0455	-1.25473	-3.5203	5e-05	0.000677386	coding	/
AUR62016623-RA	0h	2h	OK	4.55965	2.17653	-1.06689	-1.73022	0.0045	0.0334369	coding	/
AUR62016630-RA	0h	2h	OK	1.6287	8.74609	2.42492	2.33841	0.0021	0.0179028	coding	/
AUR62016634-RA	0h	2h	OK	2.53043	8.18966	1.69442	2.86199	5e-05	0.000677386	coding	/
AUR62016649-RA	0h	2h	OK	0.663323	9.30299	3.80991	4.40364	5e-05	0.000677386	coding	/
AUR62016655-RA	0h	2h	OK	5.72467	17.2534	1.59162	1.79049	0.00675	0.046281	coding	/
AUR62016663-RA	0h	2h	OK	1.39102	6.48497	2.22096	5.38069	5e-05	0.000677386	coding	/
AUR62016691-RA	0h	2h	OK	0.537864	1.33286	1.30921	2.3057	0.00015	0.00185128	coding	/
AUR62016694-RA	0h	2h	OK	0.264746	4.02577	3.92658	6.06806	5e-05	0.000677386	coding	/
AUR62016734-RA	0h	2h	OK	7.92547	16.108	1.02321	2.30678	0.00025	0.00289824	coding	/
AUR62016790-RA	0h	2h	OK	51.6306	119.181	1.20686	4.21139	5e-05	0.000677386	coding	/
AUR62016827-RA	0h	2h	OK	25.1028	51.6378	1.04058	1.65715	0.00675	0.046281	coding	/
AUR62016828-RA	0h	2h	OK	6.28831	2.19875	-1.51599	-2.60731	0.0001	0.00128341	coding	/
AUR62016850-RA	0h	2h	OK	22.9775	8.34743	-1.46082	-4.24607	5e-05	0.000677386	coding	/
AUR62016873-RA	0h	2h	OK	5.08737	1.4323	-1.82859	-3.58926	5e-05	0.000677386	coding	/
AUR62016898-RA	0h	2h	OK	16.3122	133.713	3.03512	9.1482	5e-05	0.000677386	coding	/
AUR62016910-RA	0h	2h	OK	1.35761	17.1182	3.65639	5.77738	5e-05	0.000677386	coding	/
AUR62016940-RA	0h	2h	OK	1.54222	5.54289	1.84563	2.01066	0.0046	0.0340245	coding	/
AUR62016945-RA	0h	2h	OK	0	3.6774	inf	#NAME?	5e-05	0.000677386	coding	/
AUR62016960-RA	0h	2h	OK	26.8243	10.4657	-1.35787	-2.88433	5e-05	0.000677386	coding	/
AUR62016981-RA	0h	2h	OK	2.0566	6.1315	1.57598	2.07954	0.003	0.0239503	coding	/
AUR62016991-RA	0h	2h	OK	8.47589	4.01531	-1.07786	-2.55415	5e-05	0.000677386	coding	/
AUR62017003-RA	0h	2h	OK	198.248	9.16304	-4.43534	-12.9861	5e-05	0.000677386	coding	/
AUR62017014-RA	0h	2h	OK	4.75727	16.0363	1.75314	2.90255	5e-05	0.000677386	coding	/
AUR62017021-RA	0h	2h	OK	1.04303	11.4026	3.45051	5.66043	5e-05	0.000677386	coding	/
AUR62017023-RA	0h	2h	OK	0	3.2569	inf	#NAME?	5e-05	0.000677386	coding	/
AUR62017026-RA	0h	2h	OK	107.311	36.4062	-1.55954	-2.05384	0.001	0.00969691	coding	/
AUR62017050-RA	0h	2h	OK	3.90503	7.83508	1.00461	1.56416	0.00725	0.0490995	coding	/
AUR62017052-RA	0h	2h	OK	2.54009	9.04665	1.8325	3.24922	5e-05	0.000677386	coding	/
AUR62017080-RA	0h	2h	OK	93.7286	26.9611	-1.79761	-5.85936	5e-05	0.000677386	coding	/
AUR62017132-RA	0h	2h	OK	0.89873	9.85457	3.45483	3.16451	0.00125	0.0116662	coding	/
AUR62017163-RA	0h	2h	OK	1.79044	12.7783	2.8353	5.15123	5e-05	0.000677386	noncoding	LncRNA
AUR62017197-RA	0h	2h	OK	2.74927	0.689264	-1.99592	-2.72879	5e-05	0.000677386	coding	/
AUR62017211-RA	0h	2h	OK	11.0966	1.35942	-3.02905	-5.93222	5e-05	0.000677386	coding	/
AUR62017217-RA	0h	2h	OK	9.20379	2.15839	-2.09227	-4.18545	5e-05	0.000677386	coding	/
AUR62017237-RA	0h	2h	OK	2.16131	0.392094	-2.46263	-3.88939	5e-05	0.000677386	coding	/
AUR62017240-RA	0h	2h	OK	36.3543	15.0902	-1.26852	-4.11541	5e-05	0.000677386	coding	/
AUR62017289-RA	0h	2h	OK	29.6669	61.2474	1.0458	3.44593	5e-05	0.000677386	coding	/
AUR62017294-RA	0h	2h	OK	0.458496	1.53217	1.7406	2.14292	0.00225	0.0189666	coding	/
AUR62017369-RA	0h	2h	OK	4.70204	1.69914	-1.46848	-2.80746	5e-05	0.000677386	coding	/
AUR62017392-RA	0h	2h	OK	8.10285	2.31828	-1.80538	-4.6735	5e-05	0.000677386	coding	/
AUR62017444-RA	0h	2h	OK	31.2252	68.2824	1.1288	2.42707	0.0001	0.00128341	coding	/
AUR62017505-RA	0h	2h	OK	15.5716	4.78379	-1.7027	-3.92132	5e-05	0.000677386	coding	/
AUR62017533-RA	0h	2h	OK	47.6011	209.371	2.13699	7.40195	5e-05	0.000677386	coding	/
AUR62017585-RA	0h	2h	OK	59.9289	331.853	2.46922	8.48011	5e-05	0.000677386	coding	/
AUR62017646-RA	0h	2h	OK	4.64958	2.1285	-1.12727	-1.98266	0.00175	0.0154215	coding	/
AUR62017666-RA	0h	2h	OK	10.4867	116.171	3.46962	9.40271	5e-05	0.000677386	coding	/
AUR62017676-RA	0h	2h	OK	58.632	22.4556	-1.38461	-4.26831	5e-05	0.000677386	coding	/
AUR62017738-RA	0h	2h	OK	11.8913	2.52414	-2.23604	-2.6409	0.0002	0.00238948	coding	/
AUR62017749-RA	0h	2h	OK	4.6646	14.6859	1.6546	2.995	5e-05	0.000677386	coding	/
AUR62017791-RA	0h	2h	OK	8.33631	3.62799	-1.20024	-2.06317	0.0004	0.00438463	coding	/
AUR62017797-RA	0h	2h	OK	3.79717	0.529821	-2.84135	-3.4717	5e-05	0.000677386	coding	/
AUR62017845-RA	0h	2h	OK	12.1995	0	#NAME?	#NAME?	5e-05	0.000677386	noncoding	LncRNA
AUR62017851-RA	0h	2h	OK	4.56376	17.7936	1.96306	2.15948	0.0012	0.0112748	coding	/
AUR62017911-RA	0h	2h	OK	8.91106	3.84458	-1.21277	-2.29766	0.00015	0.00185128	coding	/
AUR62017962-RA	0h	2h	OK	2.56049	0.990657	-1.36996	-1.74225	0.0061	0.0427796	coding	/
AUR62017970-RA	0h	2h	OK	18.0128	49.408	1.45572	4.97138	5e-05	0.000677386	coding	/
AUR62017987-RA	0h	2h	OK	0.585598	1.67848	1.51917	2.86129	5e-05	0.000677386	coding	/
AUR62017994-RA	0h	2h	OK	80.2139	20.5402	-1.9654	-2.65278	0.0004	0.00438463	coding	/
AUR62018026-RA	0h	2h	OK	4.2299	1.67325	-1.33797	-1.96353	0.0015	0.0135722	coding	/
AUR62018107-RA	0h	2h	OK	0.392296	2.04007	2.3786	1.98887	0.0069	0.0471055	coding	/
AUR62018118-RA	0h	2h	OK	5.89708	2.21313	-1.41391	-2.41414	0.00015	0.00185128	coding	/
AUR62018140-RA	0h	2h	OK	3.44851	1.12371	-1.6177	-1.96907	0.0039	0.0297237	coding	/
AUR62018199-RA	0h	2h	OK	72.651	22.5527	-1.68768	-5.3755	5e-05	0.000677386	coding	/
AUR62018201-RA	0h	2h	OK	1.81026	7.43306	2.03776	4.08166	5e-05	0.000677386	coding	/
AUR62018205-RA	0h	2h	OK	83.5029	32.1275	-1.37802	-4.52292	5e-05	0.000677386	noncoding	LncRNA
AUR62018212-RA	0h	2h	OK	1.81192	0.3819	-2.24626	-3.18485	5e-05	0.000677386	coding	/
AUR62018215-RA	0h	2h	OK	4.82487	1.3948	-1.79043	-3.19006	5e-05	0.000677386	coding	/
AUR62018281-RA	0h	2h	OK	53.2544	157.807	1.56719	5.34165	5e-05	0.000677386	coding	/
AUR62018283-RA	0h	2h	OK	5.83071	19.4373	1.73709	3.63875	5e-05	0.000677386	coding	/
AUR62018300-RA	0h	2h	OK	1.53517	7.85244	2.35474	4.88506	5e-05	0.000677386	coding	/
AUR62018309-RA	0h	2h	OK	8.75759	23.04	1.39554	3.78753	5e-05	0.000677386	coding	/
AUR62018312-RA	0h	2h	OK	32.0252	11.1887	-1.51717	-2.45705	5e-05	0.000677386	coding	/
AUR62018325-RA	0h	2h	OK	5.38126	1.39485	-1.94783	-3.98228	5e-05	0.000677386	coding	/
AUR62018341-RA	0h	2h	OK	13.4889	0.708668	-4.25052	-5.2219	0.0005	0.00533502	coding	/
AUR62018374-RA	0h	2h	OK	0.748904	1.59396	1.08976	1.91344	0.0019	0.0164993	coding	/
AUR62018391-RA	0h	2h	OK	1.42437	0.258888	-2.45992	-2.46338	0.0024	0.0199986	coding	/
AUR62018444-RA	0h	2h	OK	12.6527	5.16542	-1.29249	-2.93094	5e-05	0.000677386	coding	/
AUR62018505-RA	0h	2h	OK	10.8738	3.32753	-1.70833	-3.40347	5e-05	0.000677386	coding	/
AUR62018512-RA	0h	2h	OK	1.90511	0.702703	-1.43889	-1.81743	0.0053	0.0382341	coding	/
AUR62018525-RA	0h	2h	OK	13.3614	0.278384	-5.58485	-5.5116	0.0003	0.00339802	coding	/
AUR62018526-RA	0h	2h	OK	40.4547	2.89924	-3.80256	-8.75197	5e-05	0.000677386	coding	/
AUR62018529-RA	0h	2h	OK	10.944	0.914344	-3.58126	-5.27364	5e-05	0.000677386	coding	/
AUR62018547-RA	0h	2h	OK	2.74653	6.53181	1.24987	2.8358	5e-05	0.000677386	coding	/
AUR62018600-RA	0h	2h	OK	3.37136	8.91895	1.40354	3.28471	5e-05	0.000677386	coding	/
AUR62018614-RA	0h	2h	OK	6.21558	2.60281	-1.25582	-3.27817	5e-05	0.000677386	coding	/
AUR62018713-RA	0h	2h	OK	6.4633	36.6372	2.50297	4.71753	5e-05	0.000677386	coding	/
AUR62018752-RA	0h	2h	OK	0.971234	3.2496	1.74237	3.01537	5e-05	0.000677386	coding	/
AUR62018762-RA	0h	2h	OK	21.5259	9.51751	-1.17742	-1.83621	0.0027	0.021981	coding	/
AUR62018768-RA	0h	2h	OK	17.3062	8.25891	-1.06726	-2.56158	0.0001	0.00128341	coding	/
AUR62018803-RA	0h	2h	OK	4.78655	21.5101	2.16795	6.01678	5e-05	0.000677386	coding	/
AUR62018804-RA	0h	2h	OK	0.758599	5.98451	2.97982	5.74213	5e-05	0.000677386	coding	/
AUR62018828-RA	0h	2h	OK	18.7908	43.7988	1.22086	2.20192	5e-05	0.000677386	coding	/
AUR62018830-RA	0h	2h	OK	58.8647	25.5646	-1.20325	-3.08304	5e-05	0.000677386	coding	/
AUR62018869-RA	0h	2h	OK	1.81247	9.43599	2.38021	4.38019	5e-05	0.000677386	coding	/
AUR62018879-RA	0h	2h	OK	22.4907	105.392	2.22836	4.00054	5e-05	0.000677386	coding	/
AUR62018880-RA	0h	2h	OK	40.1198	89.2919	1.15421	3.77857	5e-05	0.000677386	coding	/
AUR62018905-RA	0h	2h	OK	1.2724	5.20364	2.03197	2.59567	0.0002	0.00238948	coding	/
AUR62018906-RA	0h	2h	OK	19.8611	225.474	3.50494	10.9987	5e-05	0.000677386	coding	/
AUR62018907-RA	0h	2h	OK	7.27218	136.244	4.22766	11.4165	5e-05	0.000677386	coding	/
AUR62018941-RA	0h	2h	OK	26.2142	6.50038	-2.01175	-4.94616	5e-05	0.000677386	coding	/
AUR62018999-RA	0h	2h	OK	0.379215	16.6958	5.46033	5.84815	0.0001	0.00128341	coding	/
AUR62019002-RA	0h	2h	OK	3.589	9.53049	1.40897	3.07795	5e-05	0.000677386	coding	/
AUR62019077-RA	0h	2h	OK	1.60967	0.764738	-1.07373	-1.90595	0.0018	0.0157881	coding	/
AUR62019082-RA	0h	2h	OK	1143.93	541.421	-1.07918	-3.58683	5e-05	0.000677386	noncoding	LncRNA
AUR62019110-RA	0h	2h	OK	66.918	280.358	2.0668	4.33237	5e-05	0.000677386	coding	/
AUR62019131-RA	0h	2h	OK	14.9156	7.32725	-1.02548	-2.80453	5e-05	0.000677386	coding	/
AUR62019188-RA	0h	2h	OK	0.731453	2.92082	1.99753	2.5994	0.0003	0.00339802	coding	/
AUR62019199-RA	0h	2h	OK	0.939059	11.8734	3.66038	3.4506	0.0001	0.00128341	coding	/
AUR62019211-RA	0h	2h	OK	111.799	38.2905	-1.54585	-5.22129	5e-05	0.000677386	coding	/
AUR62019246-RA	0h	2h	OK	0.245028	1.51752	2.63069	4.38686	5e-05	0.000677386	coding	/
AUR62019300-RA	0h	2h	OK	13.7285	5.30386	-1.37206	-2.48822	0.0002	0.00238948	coding	/
AUR62019304-RA	0h	2h	OK	1.30439	2.98534	1.19452	1.92056	0.00285	0.022966	coding	/
AUR62019329-RA	0h	2h	OK	6.86533	29.4524	2.10098	6.11303	5e-05	0.000677386	coding	/
AUR62019341-RA	0h	2h	OK	11.7096	3.78533	-1.6292	-3.32016	5e-05	0.000677386	coding	/
AUR62019353-RA	0h	2h	OK	1.32	10.5349	2.99657	4.97989	5e-05	0.000677386	coding	/
AUR62019359-RA	0h	2h	OK	2.24304	0.768546	-1.54525	-1.91932	0.00195	0.0168315	coding	/
AUR62019361-RA	0h	2h	OK	4.19437	0.242948	-4.10974	-2.78298	0.00345	0.0268935	coding	/
AUR62019395-RA	0h	2h	OK	7.86909	1.39789	-2.49294	-2.87585	5e-05	0.000677386	coding	/
AUR62019426-RA	0h	2h	OK	8.77403	4.00197	-1.13253	-2.42721	0.00015	0.00185128	coding	/
AUR62019428-RA	0h	2h	OK	3.75405	0.376574	-3.31744	-3.41471	5e-05	0.000677386	coding	/
AUR62019434-RA	0h	2h	OK	13.0496	1.77065	-2.88165	-3.5197	5e-05	0.000677386	coding	/
AUR62019489-RA	0h	2h	OK	13.7771	5.90682	-1.22181	-3.39773	5e-05	0.000677386	coding	/
AUR62019493-RA	0h	2h	OK	1.36797	0.40445	-1.75801	-2.63931	5e-05	0.000677386	coding	/
AUR62019498-RA	0h	2h	OK	3.48509	0.289174	-3.59119	-4.86492	5e-05	0.000677386	coding	/
AUR62019537-RA	0h	2h	OK	2.20273	0.907826	-1.27881	-1.85442	0.00275	0.0223186	coding	/
AUR62019541-RA	0h	2h	OK	3.93355	9.84694	1.32384	2.22702	0.0017	0.0150558	coding	/
AUR62019549-RA	0h	2h	OK	21.4537	2.48888	-3.10765	-4.11105	5e-05	0.000677386	coding	/
AUR62019601-RA	0h	2h	OK	13.4864	29.9618	1.15162	3.75488	5e-05	0.000677386	coding	/
AUR62019626-RA	0h	2h	OK	1.83108	4.41864	1.27091	2.40557	0.0003	0.00339802	coding	/
AUR62019649-RA	0h	2h	OK	6.47551	13.0805	1.01435	2.64895	5e-05	0.000677386	coding	/
AUR62019673-RA	0h	2h	OK	13.6254	28.2875	1.05386	2.61566	5e-05	0.000677386	coding	/
AUR62019677-RA	0h	2h	OK	47.7629	17.843	-1.42053	-3.96377	5e-05	0.000677386	coding	/
AUR62019741-RA	0h	2h	OK	115.587	19.2499	-2.58605	-8.55265	5e-05	0.000677386	coding	/
AUR62019750-RA	0h	2h	OK	3.26961	27.6952	3.08244	7.85516	5e-05	0.000677386	coding	/
AUR62019763-RA	0h	2h	OK	6.21241	48.2472	2.95722	7.52581	5e-05	0.000677386	coding	/
AUR62019795-RA	0h	2h	OK	4.59051	10.8727	1.24398	3.32313	5e-05	0.000677386	coding	/
AUR62019820-RA	0h	2h	OK	0.983486	16.5561	4.07331	5.09621	5e-05	0.000677386	coding	/
AUR62019851-RA	0h	2h	OK	61.8985	21.18	-1.5472	-2.79362	5e-05	0.000677386	coding	/
AUR62019852-RA	0h	2h	OK	3.748	11.3875	1.60326	4.58373	5e-05	0.000677386	coding	/
AUR62019872-RA	0h	2h	OK	5.01509	1.30307	-1.94436	-3.34105	5e-05	0.000677386	coding	/
AUR62019889-RA	0h	2h	OK	12.1098	28.2892	1.22408	3.76171	5e-05	0.000677386	coding	/
AUR62019896-RA	0h	2h	OK	4.13391	9.82436	1.24886	3.61298	5e-05	0.000677386	coding	/
AUR62019904-RA	0h	2h	OK	106.969	7.06771	-3.91981	-9.27075	5e-05	0.000677386	coding	/
AUR62019917-RA	0h	2h	OK	9.5031	4.58336	-1.05199	-2.41837	0.00045	0.00486448	coding	/
AUR62019931-RA	0h	2h	OK	7.93544	16.6087	1.06555	2.49796	5e-05	0.000677386	coding	/
AUR62019937-RA	0h	2h	OK	12.4785	2.28896	-2.44668	-2.41683	0.0015	0.0135722	coding	/
AUR62019946-RA	0h	2h	OK	42.2393	98.5806	1.22272	4.09199	5e-05	0.000677386	coding	/
AUR62019958-RA	0h	2h	OK	916.054	148.033	-2.62952	-8.44074	5e-05	0.000677386	coding	/
AUR62019960-RA	0h	2h	OK	3.5987	1.26439	-1.50904	-3.34186	5e-05	0.000677386	coding	/
AUR62019972-RA	0h	2h	OK	1.69329	4.21696	1.31637	2.10702	0.0013	0.0120581	coding	/
AUR62019981-RA	0h	2h	OK	27.1382	57.7312	1.08903	3.79776	5e-05	0.000677386	coding	/
AUR62020020-RA	0h	2h	OK	8.90369	1.07217	-3.05388	-4.76718	5e-05	0.000677386	coding	/
AUR62020030-RA	0h	2h	OK	1.06388	7.10355	2.7392	2.98754	5e-05	0.000677386	coding	/
AUR62020058-RA	0h	2h	OK	0.5186	4.15289	3.00142	4.01204	5e-05	0.000677386	coding	/
AUR62020076-RA	0h	2h	OK	7.4743	16.8503	1.17277	3.42407	5e-05	0.000677386	coding	/
AUR62020090-RA	0h	2h	OK	4.18603	10.1658	1.28006	3.35274	5e-05	0.000677386	coding	/
AUR62020109-RA	0h	2h	OK	1.19873	3.81408	1.66983	3.65322	5e-05	0.000677386	coding	/
AUR62020149-RA	0h	2h	OK	4.16105	9.8826	1.24794	3.71749	5e-05	0.000677386	coding	/
AUR62020233-RA	0h	2h	OK	0.18045	9.18039	5.66889	5.69153	0.00015	0.00185128	coding	/
AUR62020240-RA	0h	2h	OK	3.13936	1.23083	-1.35084	-2.27736	0.00035	0.00390194	coding	/
AUR62020338-RA	0h	2h	OK	0.480621	2.17555	2.17841	2.80256	0.00025	0.00289824	coding	/
AUR62020364-RA	0h	2h	OK	2.68757	1.04153	-1.36759	-2.50339	5e-05	0.000677386	coding	/
AUR62020370-RA	0h	2h	OK	2.91716	5.97237	1.03374	1.9052	0.0014	0.012806	coding	/
AUR62020371-RA	0h	2h	OK	2.2841	16.0246	2.81059	7.364	5e-05	0.000677386	coding	/
AUR62020383-RA	0h	2h	OK	54.3985	16.4673	-1.72397	-5.79024	5e-05	0.000677386	coding	/
AUR62020429-RA	0h	2h	OK	10.7303	25.4362	1.2452	3.8025	5e-05	0.000677386	coding	/
AUR62020494-RA	0h	2h	OK	133.773	23.3613	-2.5176	-5.63167	5e-05	0.000677386	coding	/
AUR62020528-RA	0h	2h	OK	2.1014	0.369	-2.50966	-2.29112	0.0048	0.0351924	coding	/
AUR62020529-RA	0h	2h	OK	4.86622	16.1168	1.7277	3.45544	5e-05	0.000677386	coding	/
AUR62020539-RA	0h	2h	OK	5.89755	1.4425	-2.03155	-4.05741	5e-05	0.000677386	coding	/
AUR62020547-RA	0h	2h	OK	10.8474	44.7774	2.04542	5.21472	5e-05	0.000677386	coding	/
AUR62020585-RA	0h	2h	OK	34.9983	13.6249	-1.36103	-3.79929	5e-05	0.000677386	coding	/
AUR62020594-RA	0h	2h	OK	16.9615	81.9414	2.27233	7.11596	5e-05	0.000677386	coding	/
AUR62020629-RA	0h	2h	OK	8.71163	1.04917	-3.0537	-2.42212	0.0001	0.00128341	coding	/
AUR62020713-RA	0h	2h	OK	29.8021	84.0064	1.49509	4.88401	5e-05	0.000677386	coding	/
AUR62020826-RA	0h	2h	OK	6.59714	3.22897	-1.03077	-1.79543	0.00255	0.0210301	coding	/
AUR62020828-RA	0h	2h	OK	23.2141	10.0593	-1.20648	-3.20206	5e-05	0.000677386	coding	/
AUR62020872-RA	0h	2h	OK	6.59497	15.578	1.24007	3.49806	5e-05	0.000677386	coding	/
AUR62020884-RA	0h	2h	OK	25.9948	1.27113	-4.35404	-3.5371	0.00015	0.00185128	coding	/
AUR62020889-RA	0h	2h	OK	38.4971	4.31145	-3.1585	-7.25643	5e-05	0.000677386	coding	/
AUR62020892-RA	0h	2h	OK	17.8263	2.00821	-3.15002	-7.43633	5e-05	0.000677386	coding	/
AUR62020893-RA	0h	2h	OK	27.9658	1.54935	-4.17393	-7.05524	5e-05	0.000677386	coding	/
AUR62020914-RA	0h	2h	OK	11.3593	4.90622	-1.21119	-2.64149	5e-05	0.000677386	coding	/
AUR62020989-RA	0h	2h	OK	13.4688	4.48357	-1.5869	-3.58558	5e-05	0.000677386	coding	/
AUR62021002-RA	0h	2h	OK	14.8173	5.71305	-1.37495	-1.90422	0.0008	0.00801318	coding	/
AUR62021079-RA	0h	2h	OK	44.0562	19.2986	-1.19085	-3.74559	5e-05	0.000677386	coding	/
AUR62021101-RA	0h	2h	OK	3.1835	0.669351	-2.24978	-2.68252	0.0007	0.00713988	coding	/
AUR62021111-RA	0h	2h	OK	4.45552	0.8059	-2.46692	-1.99885	0.006	0.0422013	coding	/
AUR62021174-RA	0h	2h	OK	4.39423	29.3506	2.73971	4.50525	5e-05	0.000677386	coding	/
AUR62021176-RA	0h	2h	OK	14.116	56.7236	2.00661	6.61929	5e-05	0.000677386	coding	/
AUR62021177-RA	0h	2h	OK	23.2115	3.97889	-2.5444	-4.95069	5e-05	0.000677386	coding	/
AUR62021178-RA	0h	2h	OK	55.0134	124.827	1.18207	4.04414	5e-05	0.000677386	coding	/
AUR62021199-RA	0h	2h	OK	3.38285	7.80371	1.20592	2.16331	0.0005	0.00533502	coding	/
AUR62021222-RA	0h	2h	OK	11.4265	5.67133	-1.01062	-2.62965	5e-05	0.000677386	coding	/
AUR62021273-RA	0h	2h	OK	41.4718	6.06703	-2.77307	-6.92139	5e-05	0.000677386	coding	/
AUR62021274-RA	0h	2h	OK	23.7251	5.80988	-2.02983	-2.29461	0.00155	0.0139428	coding	/
AUR62021277-RA	0h	2h	OK	4.33878	27.7835	2.67887	2.61223	0.0007	0.00713988	coding	/
AUR62021292-RA	0h	2h	OK	1.68993	10.1117	2.58099	2.16608	0.00255	0.0210301	coding	/
AUR62021309-RA	0h	2h	OK	18.9235	6.79225	-1.47822	-3.47964	5e-05	0.000677386	coding	/
AUR62021318-RA	0h	2h	OK	7.8674	1.43313	-2.45672	-5.48767	5e-05	0.000677386	coding	/
AUR62021327-RA	0h	2h	OK	2.67326	0.513655	-2.37973	-2.40952	0.00215	0.0182489	coding	/
AUR62021353-RA	0h	2h	OK	3.59882	13.2039	1.87537	2.08352	0.0009	0.00885854	coding	/
AUR62021356-RA	0h	2h	OK	5.27082	12.1938	1.21004	3.47305	5e-05	0.000677386	coding	/
AUR62021372-RA	0h	2h	OK	18.1632	79.926	2.13765	7.00335	5e-05	0.000677386	coding	/
AUR62021375-RA	0h	2h	OK	2.07102	14.9969	2.85625	2.95799	0.0013	0.0120581	coding	/
AUR62021382-RA	0h	2h	OK	13.2996	75.1511	2.49842	7.55201	5e-05	0.000677386	coding	/
AUR62021413-RA	0h	2h	OK	2.21568	15.9483	2.84758	6.7148	5e-05	0.000677386	coding	/
AUR62021414-RA	0h	2h	OK	9.11709	30.6966	1.75143	4.55204	5e-05	0.000677386	coding	/
AUR62021443-RA	0h	2h	OK	8.20812	20.343	1.30941	4.09037	5e-05	0.000677386	coding	/
AUR62021444-RA	0h	2h	OK	8.18712	35.22	2.10497	6.12918	5e-05	0.000677386	coding	/
AUR62021451-RA	0h	2h	OK	31.8873	5.37358	-2.56903	-6.03717	5e-05	0.000677386	coding	/
AUR62021468-RA	0h	2h	OK	22.2741	48.9856	1.13699	3.95592	5e-05	0.000677386	coding	/
AUR62021492-RA	0h	2h	OK	8.61067	1.81886	-2.24309	-6.11671	5e-05	0.000677386	coding	/
AUR62021494-RA	0h	2h	OK	1.2588	4.48228	1.83218	3.71212	5e-05	0.000677386	coding	/
AUR62021499-RA	0h	2h	OK	1.79216	0.730863	-1.29403	-2.13591	0.0007	0.00713988	coding	/
AUR62021506-RA	0h	2h	OK	1.41933	0.217748	-2.70449	-2.62163	0.0012	0.0112748	coding	/
AUR62021507-RA	0h	2h	OK	19.4619	54.2765	1.47967	4.58207	5e-05	0.000677386	coding	/
AUR62021518-RA	0h	2h	OK	3.58032	7.77604	1.11895	2.90645	5e-05	0.000677386	coding	/
AUR62021575-RA	0h	2h	OK	7.22955	1.17301	-2.6237	-4.14741	5e-05	0.000677386	coding	/
AUR62021662-RA	0h	2h	OK	18.0024	41.8016	1.21537	3.41472	5e-05	0.000677386	coding	/
AUR62021687-RA	0h	2h	OK	10.6164	36.169	1.76845	4.9604	5e-05	0.000677386	coding	/
AUR62021691-RA	0h	2h	OK	13.2435	3.92851	-1.75323	-3.81754	5e-05	0.000677386	coding	/
AUR62021736-RA	0h	2h	OK	2.59686	0.860645	-1.59328	-2.58228	0.0001	0.00128341	coding	/
AUR62021762-RA	0h	2h	OK	4.18067	1.5505	-1.431	-1.90559	0.0062	0.0433395	coding	/
AUR62021806-RA	0h	2h	OK	22.6369	10.5838	-1.09682	-2.64517	5e-05	0.000677386	coding	/
AUR62021808-RA	0h	2h	OK	3.67074	10.4433	1.50843	2.64582	5e-05	0.000677386	coding	/
AUR62021819-RA	0h	2h	OK	18.9414	5.00509	-1.92008	-5.70143	5e-05	0.000677386	coding	/
AUR62021908-RA	0h	2h	OK	11.0331	23.2156	1.07326	2.27853	0.0004	0.00438463	coding	/
AUR62021911-RA	0h	2h	OK	3.59785	7.46182	1.05239	2.97728	5e-05	0.000677386	coding	/
AUR62022002-RA	0h	2h	OK	82.9134	28.0105	-1.56564	-5.14907	5e-05	0.000677386	coding	/
AUR62022072-RA	0h	2h	OK	20.6874	65.5842	1.6646	5.31182	5e-05	0.000677386	coding	/
AUR62022096-RA	0h	2h	OK	2.44947	6.10918	1.31851	2.67947	5e-05	0.000677386	coding	/
AUR62022119-RA	0h	2h	OK	28.6377	4.18876	-2.77332	-7.57854	5e-05	0.000677386	coding	/
AUR62022130-RA	0h	2h	OK	1415.79	417.598	-1.76142	-5.69969	5e-05	0.000677386	coding	/
AUR62022173-RA	0h	2h	OK	12.1907	51.4812	2.07826	1.88319	0.0032	0.0252521	coding	/
AUR62022200-RA	0h	2h	OK	16.1912	120.878	2.90028	9.92366	5e-05	0.000677386	coding	/
AUR62022233-RA	0h	2h	OK	21.7529	5.75475	-1.91838	-3.16056	5e-05	0.000677386	coding	/
AUR62022355-RA	0h	2h	OK	142.155	47.4864	-1.58188	-4.38372	5e-05	0.000677386	coding	/
AUR62022395-RA	0h	2h	OK	0.602083	2.18464	1.85936	1.99534	0.00445	0.0331472	coding	/
AUR62022419-RA	0h	2h	OK	4.43234	1.62982	-1.44336	-2.30455	0.00075	0.00757795	coding	/
AUR62022534-RA	0h	2h	OK	44.7156	19.3477	-1.20862	-1.69304	0.0027	0.021981	coding	/
AUR62022551-RA	0h	2h	OK	4.66793	1.4812	-1.65602	-2.90815	5e-05	0.000677386	coding	/
AUR62022559-RA	0h	2h	OK	11.0267	2.45987	-2.16434	-3.72469	5e-05	0.000677386	coding	/
AUR62022583-RA	0h	2h	OK	19.8057	8.8843	-1.15658	-2.04127	0.0011	0.0104891	coding	/
AUR62022614-RA	0h	2h	OK	15.4772	32.059	1.05058	2.7691	5e-05	0.000677386	coding	/
AUR62022622-RA	0h	2h	OK	56.6692	273.11	2.26885	5.82408	5e-05	0.000677386	coding	/
AUR62022650-RA	0h	2h	OK	0.897055	4.7616	2.40818	3.39966	5e-05	0.000677386	coding	/
AUR62022681-RA	0h	2h	OK	100.897	321.775	1.67316	5.81578	5e-05	0.000677386	coding	/
AUR62022715-RA	0h	2h	OK	6.36845	22.3945	1.81413	4.20392	5e-05	0.000677386	coding	/
AUR62022733-RA	0h	2h	OK	11.3317	0.794151	-3.83481	-6.85733	5e-05	0.000677386	coding	/
AUR62022771-RA	0h	2h	OK	2.98787	10.6811	1.83787	4.01311	5e-05	0.000677386	coding	/
AUR62022783-RA	0h	2h	OK	13.6075	2.03997	-2.73779	-3.12022	0.0003	0.00339802	coding	/
AUR62022802-RA	0h	2h	OK	7.60636	3.62839	-1.06788	-2.86754	5e-05	0.000677386	coding	/
AUR62022808-RA	0h	2h	OK	0.945067	2.20509	1.22235	2.0465	0.00165	0.0146778	coding	/
AUR62022812-RA	0h	2h	OK	10.1289	23.1702	1.1938	3.64932	5e-05	0.000677386	coding	/
AUR62022819-RA	0h	2h	OK	17.1503	39.0696	1.18781	3.50458	5e-05	0.000677386	coding	/
AUR62022826-RA	0h	2h	OK	7.56061	2.84152	-1.41184	-3.05436	5e-05	0.000677386	coding	/
AUR62022838-RA	0h	2h	OK	23.7253	11.6957	-1.02044	-2.39691	0.00015	0.00185128	coding	/
AUR62022857-RA	0h	2h	OK	7.04255	74.7105	3.40714	6.22142	5e-05	0.000677386	coding	/
AUR62022870-RA	0h	2h	OK	3.37265	7.9457	1.23629	2.92527	5e-05	0.000677386	coding	/
AUR62022895-RA	0h	2h	OK	24.4558	100.967	2.04564	7.01925	5e-05	0.000677386	coding	/
AUR62022922-RA	0h	2h	OK	1.56338	0.334899	-2.22287	-1.95361	0.00695	0.0473931	noncoding	LncRNA
AUR62022943-RA	0h	2h	OK	37.8231	99.9449	1.40187	4.70599	5e-05	0.000677386	coding	/
AUR62022950-RA	0h	2h	OK	21.9718	4.50853	-2.28492	-2.45535	0.00065	0.00669571	coding	/
AUR62022966-RA	0h	2h	OK	4.3934	12.1602	1.46875	3.59165	5e-05	0.000677386	coding	/
AUR62022983-RA	0h	2h	OK	27.5499	6.17586	-2.15734	-5.57151	5e-05	0.000677386	coding	/
AUR62022987-RA	0h	2h	OK	37.623	106.717	1.5041	5.03737	5e-05	0.000677386	coding	/
AUR62022989-RA	0h	2h	OK	17.4797	51.6027	1.56176	4.92142	5e-05	0.000677386	coding	/
AUR62023000-RA	0h	2h	OK	8.46599	2.66587	-1.66707	-2.71458	0.00015	0.00185128	coding	/
AUR62023036-RA	0h	2h	OK	19.6743	7.63822	-1.365	-3.76897	5e-05	0.000677386	coding	/
AUR62023067-RA	0h	2h	OK	0	2.01962	inf	#NAME?	5e-05	0.000677386	coding	/
AUR62023086-RA	0h	2h	OK	0.836733	3.77948	2.17535	3.47477	5e-05	0.000677386	coding	/
AUR62023101-RA	0h	2h	OK	3.79561	14.0954	1.89282	2.11262	0.0018	0.0157881	coding	/
AUR62023114-RA	0h	2h	OK	12.1184	3.90114	-1.63524	-1.9035	0.00605	0.0424933	coding	/
AUR62023167-RA	0h	2h	OK	42.7434	96.3082	1.17196	4.03802	5e-05	0.000677386	coding	/
AUR62023209-RA	0h	2h	OK	0.416136	1.36408	1.7128	2.21619	0.00175	0.0154215	coding	/
AUR62023233-RA	0h	2h	OK	14.9151	33.7082	1.17632	3.67145	5e-05	0.000677386	coding	/
AUR62023236-RA	0h	2h	OK	2.44312	0.317625	-2.94333	-2.45006	0.0056	0.039915	coding	/
AUR62023263-RA	0h	2h	OK	17.4754	37.507	1.10183	3.71463	5e-05	0.000677386	coding	/
AUR62023275-RA	0h	2h	OK	1.68697	9.12529	2.43544	4.21401	5e-05	0.000677386	coding	/
AUR62023325-RA	0h	2h	OK	11.8712	79.7486	2.748	8.92323	5e-05	0.000677386	coding	/
AUR62023370-RA	0h	2h	OK	6.31002	19.0596	1.5948	2.90594	5e-05	0.000677386	coding	/
AUR62023372-RA	0h	2h	OK	76.5139	30.6865	-1.31811	-4.05102	5e-05	0.000677386	coding	/
AUR62023399-RA	0h	2h	OK	0.813106	2.30216	1.50148	2.33311	0.00045	0.00486448	coding	/
AUR62023407-RA	0h	2h	OK	9.90885	3.49175	-1.50477	-3.17268	5e-05	0.000677386	coding	/
AUR62023453-RA	0h	2h	OK	2.42799	5.37162	1.14559	2.53863	5e-05	0.000677386	coding	/
AUR62023487-RA	0h	2h	OK	8.94677	2.24048	-1.99756	-3.9643	5e-05	0.000677386	coding	/
AUR62023525-RA	0h	2h	OK	45.1732	12.199	-1.8887	-5.8539	5e-05	0.000677386	coding	/
AUR62023540-RA	0h	2h	OK	128.565	39.1797	-1.71432	-5.87377	5e-05	0.000677386	coding	/
AUR62023550-RA	0h	2h	OK	4.12401	29.7085	2.84875	7.88064	5e-05	0.000677386	coding	/
AUR62023584-RA	0h	2h	OK	2.98584	6.34425	1.08731	1.71443	0.00325	0.0255897	coding	/
AUR62023630-RA	0h	2h	OK	11.057	1.66531	-2.73109	-3.85605	5e-05	0.000677386	coding	/
AUR62023726-RA	0h	2h	OK	12.7424	36.4941	1.51803	4.66582	5e-05	0.000677386	coding	/
AUR62023727-RA	0h	2h	OK	20.888	53.5892	1.35927	4.38645	5e-05	0.000677386	coding	/
AUR62023778-RA	0h	2h	OK	6.65354	27.3266	2.03811	4.18503	5e-05	0.000677386	coding	/
AUR62023801-RA	0h	2h	OK	8.00123	29.6389	1.8892	5.36524	5e-05	0.000677386	coding	/
AUR62023809-RA	0h	2h	OK	27.4525	56.0508	1.0298	3.167	5e-05	0.000677386	coding	/
AUR62023850-RA	0h	2h	OK	2.31146	18.0995	2.96908	5.59247	5e-05	0.000677386	coding	/
AUR62023859-RA	0h	2h	OK	48.5805	11.3364	-2.09941	-6.4929	5e-05	0.000677386	coding	/
AUR62023916-RA	0h	2h	OK	1.44547	18.2994	3.66218	3.06816	0.00455	0.0337293	coding	/
AUR62023921-RA	0h	2h	OK	19.9132	3.53162	-2.49532	-5.94877	5e-05	0.000677386	coding	/
AUR62023923-RA	0h	2h	OK	114.494	26.5199	-2.11012	-3.39379	5e-05	0.000677386	coding	/
AUR62023942-RA	0h	2h	OK	4.26205	21.719	2.34934	5.38933	5e-05	0.000677386	coding	/
AUR62023955-RA	0h	2h	OK	1.36107	13.2351	3.28156	6.82857	5e-05	0.000677386	coding	/
AUR62024047-RA	0h	2h	OK	5.2084	2.34579	-1.15077	-2.27934	0.00045	0.00486448	coding	/
AUR62024116-RA	0h	2h	OK	35.5935	12.1409	-1.55174	-5.07871	5e-05	0.000677386	coding	/
AUR62024119-RA	0h	2h	OK	19.8165	56.4274	1.50969	4.57148	5e-05	0.000677386	coding	/
AUR62024164-RA	0h	2h	OK	8.33915	21.791	1.38576	4.18624	5e-05	0.000677386	coding	/
AUR62024182-RA	0h	2h	OK	3.85091	1.34236	-1.52043	-3.60156	5e-05	0.000677386	coding	/
AUR62024187-RA	0h	2h	OK	3.38686	11.5224	1.76641	3.74024	5e-05	0.000677386	coding	/
AUR62024235-RA	0h	2h	OK	12.3536	33.1478	1.42398	4.75943	5e-05	0.000677386	coding	/
AUR62024342-RA	0h	2h	OK	0.704845	108.77	7.26976	5.7326	0.0019	0.0164993	coding	/
AUR62024345-RA	0h	2h	OK	4.28232	1.49841	-1.51496	-2.48649	0.00045	0.00486448	coding	/
AUR62024381-RA	0h	2h	OK	5.37761	1.43614	-1.90477	-3.72974	5e-05	0.000677386	coding	/
AUR62024390-RA	0h	2h	OK	8.93923	3.61621	-1.30567	-2.407	0.0003	0.00339802	coding	/
AUR62024407-RA	0h	2h	OK	28.8312	3.81767	-2.91687	-4.81681	5e-05	0.000677386	coding	/
AUR62024423-RA	0h	2h	OK	4.84704	1.90149	-1.34997	-2.5457	0.0001	0.00128341	coding	/
AUR62024429-RA	0h	2h	OK	1.97806	14.6527	2.88901	7.52861	5e-05	0.000677386	coding	/
AUR62024439-RA	0h	2h	OK	2.8574	0.53254	-2.42374	-4.76826	5e-05	0.000677386	coding	/
AUR62024440-RA	0h	2h	OK	70.2278	20.9917	-1.74222	-5.67879	5e-05	0.000677386	coding	/
AUR62024441-RA	0h	2h	OK	46.0819	15.8252	-1.54197	-4.82376	5e-05	0.000677386	coding	/
AUR62024443-RA	0h	2h	OK	71.6983	35.3361	-1.0208	-3.38726	5e-05	0.000677386	coding	/
AUR62024447-RA	0h	2h	OK	4.84113	1.55077	-1.64236	-4.09041	5e-05	0.000677386	coding	/
AUR62024462-RA	0h	2h	OK	5.30655	16.5284	1.6391	2.56217	5e-05	0.000677386	coding	/
AUR62024465-RA	0h	2h	OK	136.707	64.0441	-1.09395	-1.60178	0.0067	0.0460589	coding	/
AUR62024485-RA	0h	2h	OK	5.75992	96.9391	4.07296	9.14411	5e-05	0.000677386	coding	/
AUR62024490-RA	0h	2h	OK	1.3724	5.39856	1.97587	2.10118	0.00345	0.0268935	coding	/
AUR62024492-RA	0h	2h	OK	3.90367	18.4079	2.23742	1.98462	0.0034	0.0266106	coding	/
AUR62024575-RA	0h	2h	OK	5.30324	18.9928	1.8405	3.67319	5e-05	0.000677386	coding	/
AUR62024594-RA	0h	2h	OK	268.926	115.68	-1.21707	-4.14597	5e-05	0.000677386	coding	/
AUR62024664-RA	0h	2h	OK	1.8739	23.2608	3.63378	5.1689	5e-05	0.000677386	coding	/
AUR62024669-RA	0h	2h	OK	11.8501	4.84193	-1.29125	-3.83348	5e-05	0.000677386	coding	/
AUR62024720-RA	0h	2h	OK	0.260031	2.94864	3.50329	3.70194	0.00025	0.00289824	coding	/
AUR62024731-RA	0h	2h	OK	11.3788	5.02056	-1.18043	-3.2406	5e-05	0.000677386	coding	/
AUR62024736-RA	0h	2h	OK	1.42109	0.374307	-1.9247	-2.37051	0.0013	0.0120581	coding	/
AUR62024747-RA	0h	2h	OK	3.76843	17.8823	2.24649	3.16488	0.00025	0.00289824	coding	/
AUR62024785-RA	0h	2h	OK	2.36179	39.3425	4.05813	10.3295	5e-05	0.000677386	coding	/
AUR62024805-RA	0h	2h	OK	85.0419	35.4716	-1.26151	-3.12605	5e-05	0.000677386	noncoding	LncRNA
AUR62024811-RA	0h	2h	OK	3.60271	39.5533	3.45664	8.28519	5e-05	0.000677386	coding	/
AUR62024826-RA	0h	2h	OK	5.68693	19.6758	1.7907	5.23882	5e-05	0.000677386	coding	/
AUR62024860-RA	0h	2h	OK	26.4863	2.84193	-3.2203	-3.41099	0.0002	0.00238948	coding	/
AUR62024867-RA	0h	2h	OK	5.39475	2.21753	-1.2826	-3.59836	5e-05	0.000677386	coding	/
AUR62024871-RA	0h	2h	OK	9.79051	3.78569	-1.37083	-1.96756	0.0016	0.0143007	coding	/
AUR62024886-RA	0h	2h	OK	25.1166	7.73927	-1.69837	-4.43419	5e-05	0.000677386	coding	/
AUR62024899-RA	0h	2h	OK	23.449	5.98849	-1.96926	-5.14372	5e-05	0.000677386	coding	/
AUR62024921-RA	0h	2h	OK	20.2325	45.8102	1.17899	3.54631	5e-05	0.000677386	coding	/
AUR62024925-RA	0h	2h	OK	71.6615	161.166	1.16928	3.92932	5e-05	0.000677386	coding	/
AUR62024932-RA	0h	2h	OK	62.4084	138.308	1.14807	3.78874	5e-05	0.000677386	coding	/
AUR62024942-RA	0h	2h	OK	7.92525	29.9026	1.91574	4.77961	5e-05	0.000677386	coding	/
AUR62024994-RA	0h	2h	OK	1.0797	3.92684	1.86274	2.48963	0.00015	0.00185128	coding	/
AUR62025003-RA	0h	2h	OK	89.0043	7.38769	-3.59068	-9.89929	5e-05	0.000677386	coding	/
AUR62025051-RA	0h	2h	OK	189.024	90.1545	-1.0681	-3.60872	5e-05	0.000677386	coding	/
AUR62025115-RA	0h	2h	OK	1372.53	678.536	-1.01634	-3.2395	5e-05	0.000677386	coding	/
AUR62025133-RA	0h	2h	OK	15.8276	96.9087	2.61418	3.46284	5e-05	0.000677386	coding	/
AUR62025181-RA	0h	2h	OK	1.54831	0.553833	-1.48317	-2.43832	0.00045	0.00486448	coding	/
AUR62025200-RA	0h	2h	OK	0.647887	155.135	7.90356	11.4451	5e-05	0.000677386	coding	/
AUR62025208-RA	0h	2h	OK	105.69	24.7635	-2.09355	-5.53676	5e-05	0.000677386	coding	/
AUR62025225-RA	0h	2h	OK	17.6343	42.246	1.26043	3.53939	5e-05	0.000677386	coding	/
AUR62025245-RA	0h	2h	OK	7.17734	14.6342	1.02782	2.63429	5e-05	0.000677386	coding	/
AUR62025247-RA	0h	2h	OK	4.95812	11.8739	1.25992	2.44555	0.0004	0.00438463	coding	/
AUR62025291-RA	0h	2h	OK	80.0566	486.764	2.60413	8.77603	5e-05	0.000677386	coding	/
AUR62025316-RA	0h	2h	OK	2.42532	9.76676	2.00971	4.35909	5e-05	0.000677386	coding	/
AUR62025336-RA	0h	2h	OK	1.14347	2.55467	1.15971	2.2538	0.00025	0.00289824	coding	/
AUR62025429-RA	0h	2h	OK	20.5669	6.90793	-1.574	-4.69246	5e-05	0.000677386	coding	/
AUR62025440-RA	0h	2h	OK	5.77515	2.70922	-1.09198	-2.17906	0.0005	0.00533502	coding	/
AUR62025459-RA	0h	2h	OK	1.96705	4.83765	1.29828	3.46705	5e-05	0.000677386	coding	/
AUR62025502-RA	0h	2h	OK	27.5172	59	1.10038	1.81885	0.0017	0.0150558	coding	/
AUR62025503-RA	0h	2h	OK	9.01775	2.27617	-1.98616	-4.55049	5e-05	0.000677386	coding	/
AUR62025510-RA	0h	2h	OK	6.1972	60.9855	3.29878	7.51576	5e-05	0.000677386	coding	/
AUR62025512-RA	0h	2h	OK	26.8976	390.49	3.85974	8.65253	5e-05	0.000677386	coding	/
AUR62025513-RA	0h	2h	OK	85.618	3.11153	-4.78222	-8.16821	5e-05	0.000677386	coding	/
AUR62025514-RA	0h	2h	OK	2.6514	115.739	5.44797	8.8815	5e-05	0.000677386	coding	/
AUR62025554-RA	0h	2h	OK	1.93667	0.734774	-1.39821	-2.13058	0.00085	0.00843816	coding	/
AUR62025562-RA	0h	2h	OK	360.058	883.623	1.2952	3.41674	5e-05	0.000677386	noncoding	LncRNA
AUR62025587-RA	0h	2h	OK	9.56297	26.5418	1.47274	4.10405	5e-05	0.000677386	coding	/
AUR62025618-RA	0h	2h	OK	13.2871	3.43921	-1.94988	-3.57648	5e-05	0.000677386	coding	/
AUR62025627-RA	0h	2h	OK	3.06118	8.44943	1.46476	2.30941	0.0003	0.00339802	coding	/
AUR62025656-RA	0h	2h	OK	67.9966	33.9535	-1.0019	-3.14139	5e-05	0.000677386	coding	/
AUR62025686-RA	0h	2h	OK	2.34406	0.768774	-1.60838	-2.21329	0.0026	0.0213255	coding	/
AUR62025733-RA	0h	2h	OK	4.70796	22.4148	2.25128	2.51243	0.00085	0.00843816	coding	/
AUR62025750-RA	0h	2h	OK	0.88767	2.02518	1.18996	1.74204	0.0074	0.0499187	coding	/
AUR62025754-RA	0h	2h	OK	56.5894	23.8594	-1.24597	-2.8577	5e-05	0.000677386	coding	/
AUR62025765-RA	0h	2h	OK	10.5852	4.81914	-1.1352	-2.13445	0.00095	0.00927935	coding	/
AUR62025872-RA	0h	2h	OK	12.9783	108.119	3.05844	7.60036	5e-05	0.000677386	coding	/
AUR62025944-RA	0h	2h	OK	20.171	50.622	1.32748	4.43072	5e-05	0.000677386	coding	/
AUR62025945-RA	0h	2h	OK	1.94228	3.90334	1.00696	2.20106	0.0001	0.00128341	coding	/
AUR62025949-RA	0h	2h	OK	23.083	4.53151	-2.34877	-5.75696	5e-05	0.000677386	coding	/
AUR62025951-RA	0h	2h	OK	130.373	286.531	1.13604	3.8665	5e-05	0.000677386	coding	/
AUR62025957-RA	0h	2h	OK	9.58902	116.276	3.60003	4.65615	5e-05	0.000677386	coding	/
AUR62026000-RA	0h	2h	OK	8.96265	1.11759	-3.00353	-2.52419	0.00545	0.0391332	coding	/
AUR62026022-RA	0h	2h	OK	3.69072	14.051	1.9287	5.24148	5e-05	0.000677386	coding	/
AUR62026026-RA	0h	2h	OK	4.5413	10.0276	1.1428	2.70384	5e-05	0.000677386	coding	/
AUR62026030-RA	0h	2h	OK	2.2667	0.661686	-1.77638	-3.30839	5e-05	0.000677386	coding	/
AUR62026031-RA	0h	2h	OK	35.7101	14.5185	-1.29844	-3.96414	5e-05	0.000677386	coding	/
AUR62026037-RA	0h	2h	OK	5.32247	1.99308	-1.41709	-3.73883	5e-05	0.000677386	coding	/
AUR62026052-RA	0h	2h	OK	2.76262	10.3083	1.8997	3.03725	5e-05	0.000677386	coding	/
AUR62026060-RA	0h	2h	OK	40.4454	7.37508	-2.45524	-6.38976	5e-05	0.000677386	coding	/
AUR62026064-RA	0h	2h	OK	7.70849	17.0123	1.14206	3.42137	5e-05	0.000677386	coding	/
AUR62026070-RA	0h	2h	OK	5.85813	92.8105	3.98578	7.07957	5e-05	0.000677386	coding	/
AUR62026081-RA	0h	2h	OK	13.7819	32.0261	1.21647	2.41887	0.0001	0.00128341	coding	/
AUR62026092-RA	0h	2h	OK	2.47016	0.45984	-2.4254	-4.47963	5e-05	0.000677386	coding	/
AUR62026104-RA	0h	2h	OK	36.8106	106.029	1.52627	5.08937	5e-05	0.000677386	coding	/
AUR62026152-RA	0h	2h	OK	1.62152	3.29296	1.02204	2.98492	5e-05	0.000677386	coding	/
AUR62026235-RA	0h	2h	OK	0.704645	5.4842	2.96031	3.90829	5e-05	0.000677386	coding	/
AUR62026272-RA	0h	2h	OK	18.1023	3.58898	-2.33453	-5.22345	5e-05	0.000677386	coding	/
AUR62026284-RA	0h	2h	OK	4.12457	9.08769	1.13967	2.16673	0.0004	0.00438463	coding	/
AUR62026303-RA	0h	2h	OK	35.2458	14.57	-1.27445	-2.05016	0.0012	0.0112748	coding	/
AUR62026341-RA	0h	2h	OK	74.7077	10.8403	-2.78485	-7.31009	5e-05	0.000677386	coding	/
AUR62026367-RA	0h	2h	OK	1.59213	7.30444	2.19782	2.21979	0.00225	0.0189666	coding	/
AUR62026385-RA	0h	2h	OK	16.6427	42.0639	1.33769	2.77392	5e-05	0.000677386	coding	/
AUR62026410-RA	0h	2h	OK	15.7089	56.0098	1.8341	5.71649	5e-05	0.000677386	coding	/
AUR62026455-RA	0h	2h	OK	6.03506	3.01477	-1.00132	-1.93143	0.0015	0.0135722	coding	/
AUR62026471-RA	0h	2h	OK	14.5723	36.3369	1.31821	3.56692	5e-05	0.000677386	coding	/
AUR62026483-RA	0h	2h	OK	19.2438	153.575	2.99648	8.72371	5e-05	0.000677386	coding	/
AUR62026513-RA	0h	2h	OK	4.26264	1.69274	-1.33238	-2.42171	0.00015	0.00185128	coding	/
AUR62026546-RA	0h	2h	OK	134.125	32.1986	-2.05851	-6.5887	5e-05	0.000677386	coding	/
AUR62026550-RA	0h	2h	OK	8.01784	57.7439	2.84838	7.12494	5e-05	0.000677386	coding	/
AUR62026571-RA	0h	2h	OK	31.5355	2.62284	-3.58778	-4.17857	5e-05	0.000677386	noncoding	LncRNA
AUR62026597-RA	0h	2h	OK	8.07944	3.20495	-1.33395	-2.91436	5e-05	0.000677386	coding	/
AUR62026631-RA	0h	2h	OK	5.29497	79.3299	3.90517	10.8918	5e-05	0.000677386	coding	/
AUR62026684-RA	0h	2h	OK	8.37876	23.0084	1.45735	1.74796	0.00685	0.0468386	coding	/
AUR62026724-RA	0h	2h	OK	66.7986	2.46595	-4.7596	-4.80711	5e-05	0.000677386	coding	/
AUR62026730-RA	0h	2h	OK	10.0465	100.309	3.3197	10.9862	5e-05	0.000677386	coding	/
AUR62026782-RA	0h	2h	OK	1.60802	4.45725	1.47087	2.83424	5e-05	0.000677386	coding	/
AUR62026795-RA	0h	2h	OK	4.639	1.40385	-1.72443	-2.60916	0.0003	0.00339802	coding	/
AUR62026798-RA	0h	2h	OK	7.35928	34.1961	2.21619	4.48645	5e-05	0.000677386	coding	/
AUR62026804-RA	0h	2h	OK	564.354	86.6726	-2.70295	-8.95763	5e-05	0.000677386	coding	/
AUR62026827-RA	0h	2h	OK	17.9249	3.20649	-2.4829	-5.66651	5e-05	0.000677386	coding	/
AUR62026829-RA	0h	2h	OK	9.85761	27.716	1.49141	4.77801	5e-05	0.000677386	coding	/
AUR62026853-RA	0h	2h	OK	224.569	60.5508	-1.89094	-6.53786	5e-05	0.000677386	coding	/
AUR62026922-RA	0h	2h	OK	4.06995	9.91668	1.28485	2.50548	5e-05	0.000677386	coding	/
AUR62026974-RA	0h	2h	OK	0.468109	2.83191	2.59686	2.93191	0.0005	0.00533502	coding	/
AUR62026978-RA	0h	2h	OK	50.2232	11.3439	-2.14644	-6.42412	5e-05	0.000677386	coding	/
AUR62026999-RA	0h	2h	OK	11.967	3.79255	-1.65782	-4.16084	5e-05	0.000677386	coding	/
AUR62027012-RA	0h	2h	OK	1.47198	3.75548	1.35123	2.10895	0.0051	0.0370265	coding	/
AUR62027016-RA	0h	2h	OK	10.8726	3.54392	-1.61729	-4.77654	5e-05	0.000677386	coding	/
AUR62027045-RA	0h	2h	OK	3.4034	1.34043	-1.34428	-2.42661	0.0001	0.00128341	coding	/
AUR62027086-RA	0h	2h	OK	4.5026	2.06076	-1.12758	-2.31737	5e-05	0.000677386	coding	/
AUR62027091-RA	0h	2h	OK	1.79049	6.42906	1.84426	3.12361	5e-05	0.000677386	coding	/
AUR62027095-RA	0h	2h	OK	4.80143	10.2078	1.08814	2.55459	5e-05	0.000677386	coding	/
AUR62027099-RA	0h	2h	OK	1.63749	8.82404	2.42996	4.77894	5e-05	0.000677386	coding	/
AUR62027162-RA	0h	2h	OK	17.5443	6.91538	-1.34312	-2.39578	5e-05	0.000677386	coding	/
AUR62027195-RA	0h	2h	OK	3.39617	11.3499	1.7407	2.17459	0.0006	0.00625561	coding	/
AUR62027240-RA	0h	2h	OK	4.34458	9.34893	1.10558	2.80271	5e-05	0.000677386	coding	/
AUR62027272-RA	0h	2h	OK	28.7805	6.20066	-2.2146	-5.39759	5e-05	0.000677386	coding	/
AUR62027273-RA	0h	2h	OK	139.787	48.2721	-1.53397	-5.11191	5e-05	0.000677386	coding	/
AUR62027280-RA	0h	2h	OK	8.00896	3.40901	-1.23226	-2.67958	5e-05	0.000677386	coding	/
AUR62027289-RA	0h	2h	OK	40.7572	8.84184	-2.20463	-2.87531	0.00075	0.00757795	coding	/
AUR62027295-RA	0h	2h	OK	5.2496	2.078	-1.33701	-2.73848	0.00015	0.00185128	coding	/
AUR62027312-RA	0h	2h	OK	5.84189	38.7714	2.73049	6.97275	5e-05	0.000677386	coding	/
AUR62027326-RA	0h	2h	OK	62.8876	12.0311	-2.38601	-7.38493	5e-05	0.000677386	coding	/
AUR62027364-RA	0h	2h	OK	7.99463	1.98542	-2.00959	-4.25292	5e-05	0.000677386	coding	/
AUR62027365-RA	0h	2h	OK	400.193	184.991	-1.11324	-3.86532	5e-05	0.000677386	coding	/
AUR62027395-RA	0h	2h	OK	213.034	28.4008	-2.90708	-8.08426	5e-05	0.000677386	noncoding	LncRNA
AUR62027396-RA	0h	2h	OK	261.998	45.024	-2.54079	-8.15786	5e-05	0.000677386	coding	/
AUR62027397-RA	0h	2h	OK	62.3361	10.1709	-2.61563	-7.6441	5e-05	0.000677386	coding	/
AUR62027408-RA	0h	2h	OK	140.787	544.367	1.95106	6.67387	5e-05	0.000677386	coding	/
AUR62027463-RA	0h	2h	OK	12.9033	29.1284	1.17469	2.89566	5e-05	0.000677386	coding	/
AUR62027482-RA	0h	2h	OK	22.2452	50.5191	1.18334	3.48317	5e-05	0.000677386	coding	/
AUR62027549-RA	0h	2h	OK	1.34116	11.1794	3.05929	8.20434	5e-05	0.000677386	coding	/
AUR62027553-RA	0h	2h	OK	9.40502	54.2204	2.52733	6.86425	5e-05	0.000677386	coding	/
AUR62027582-RA	0h	2h	OK	0.365315	2.77652	2.92607	3.18007	0.00045	0.00486448	coding	/
AUR62027652-RA	0h	2h	OK	11.45	100.558	3.13461	9.68955	5e-05	0.000677386	coding	/
AUR62027692-RA	0h	2h	OK	3.55443	0.796704	-2.1575	-2.10059	0.00295	0.0236232	coding	/
AUR62027697-RA	0h	2h	OK	6.53154	2.39661	-1.44643	-3.52386	5e-05	0.000677386	coding	/
AUR62027707-RA	0h	2h	OK	19.4345	5.77791	-1.75	-4.76591	5e-05	0.000677386	coding	/
AUR62027726-RA	0h	2h	OK	4.54897	13.8037	1.60144	2.5086	5e-05	0.000677386	coding	/
AUR62027741-RA	0h	2h	OK	2.93229	77.9547	4.73253	10.4429	5e-05	0.000677386	coding	/
AUR62027742-RA	0h	2h	OK	14.9177	202.025	3.75944	11.8104	5e-05	0.000677386	coding	/
AUR62027783-RA	0h	2h	OK	4.4329	1.48226	-1.58045	-2.47436	0.0003	0.00339802	coding	/
AUR62027785-RA	0h	2h	OK	2.62822	11.0738	2.075	4.14493	5e-05	0.000677386	coding	/
AUR62027829-RA	0h	2h	OK	58.5629	9.656	-2.60049	-3.76648	5e-05	0.000677386	coding	/
AUR62027844-RA	0h	2h	OK	8.80006	52.7976	2.58489	6.83123	5e-05	0.000677386	coding	/
AUR62027865-RA	0h	2h	OK	20.6763	2.35306	-3.13536	-4.41043	5e-05	0.000677386	coding	/
AUR62027872-RA	0h	2h	OK	42.2944	13.1997	-1.67996	-2.38523	5e-05	0.000677386	coding	/
AUR62027874-RA	0h	2h	OK	131.304	61.3768	-1.09715	-3.77218	5e-05	0.000677386	coding	/
AUR62027877-RA	0h	2h	OK	76.4762	36.298	-1.07512	-3.47802	5e-05	0.000677386	coding	/
AUR62027878-RA	0h	2h	OK	21.0929	9.67404	-1.12457	-2.91773	5e-05	0.000677386	coding	/
AUR62028011-RA	0h	2h	OK	27.913	139.835	2.32471	7.17431	5e-05	0.000677386	coding	/
AUR62028075-RA	0h	2h	OK	4.31876	0.928376	-2.21783	-4.15224	5e-05	0.000677386	coding	/
AUR62028077-RA	0h	2h	OK	3.06108	1.07922	-1.50405	-2.51825	0.00015	0.00185128	coding	/
AUR62028078-RA	0h	2h	OK	3.70832	12.8092	1.78835	2.22447	0.0055	0.039417	coding	/
AUR62028086-RA	0h	2h	OK	87.7008	192.887	1.13709	3.98109	5e-05	0.000677386	coding	/
AUR62028095-RA	0h	2h	OK	84.5759	27.9876	-1.59546	-3.46467	5e-05	0.000677386	coding	/
AUR62028096-RA	0h	2h	OK	146.162	40.0144	-1.86897	-6.46618	5e-05	0.000677386	coding	/
AUR62028103-RA	0h	2h	OK	12.7218	29.4881	1.21283	3.11119	5e-05	0.000677386	coding	/
AUR62028198-RA	0h	2h	OK	13.7944	35.3171	1.35629	2.91584	5e-05	0.000677386	coding	/
AUR62028298-RA	0h	2h	OK	100.085	522.517	2.38425	8.17212	5e-05	0.000677386	coding	/
AUR62028332-RA	0h	2h	OK	3.49755	1.64717	-1.08635	-1.71386	0.0054	0.0388484	coding	/
AUR62028386-RA	0h	2h	OK	2.39991	0.671909	-1.83664	-2.39822	0.00055	0.00579049	coding	/
AUR62028404-RA	0h	2h	OK	75.2746	304.607	2.01672	7.00452	5e-05	0.000677386	coding	/
AUR62028515-RA	0h	2h	OK	13.8865	33.0521	1.25106	2.0827	0.0003	0.00339802	coding	/
AUR62028557-RA	0h	2h	OK	274.13	114.038	-1.26534	-4.35722	5e-05	0.000677386	coding	/
AUR62028572-RA	0h	2h	OK	20.2338	53.2663	1.39645	4.34139	5e-05	0.000677386	coding	/
AUR62028595-RA	0h	2h	OK	11.4064	3.31394	-1.78322	-2.507	0.00045	0.00486448	coding	/
AUR62028637-RA	0h	2h	OK	1.71155	6.76985	1.98382	3.48235	5e-05	0.000677386	coding	/
AUR62028696-RA	0h	2h	OK	25.8795	7.1786	-1.85004	-3.64837	5e-05	0.000677386	coding	/
AUR62028772-RA	0h	2h	OK	3.16141	13.4674	2.09083	4.00806	5e-05	0.000677386	coding	/
AUR62028863-RA	0h	2h	OK	10.1495	174.446	4.1033	11.4871	5e-05	0.000677386	coding	/
AUR62028864-RA	0h	2h	OK	58.2708	4.06295	-3.84217	-8.96831	5e-05	0.000677386	coding	/
AUR62028865-RA	0h	2h	OK	23.4384	51.9373	1.14789	3.36469	5e-05	0.000677386	coding	/
AUR62028868-RA	0h	2h	OK	33.5099	15.2055	-1.14	-3.51586	5e-05	0.000677386	coding	/
AUR62028884-RA	0h	2h	OK	5.62761	2.80587	-1.00407	-1.80136	0.00275	0.0223186	coding	/
AUR62028888-RA	0h	2h	OK	130.073	25.2114	-2.36718	-2.17425	0.0007	0.00713988	coding	/
AUR62028924-RA	0h	2h	OK	17.7842	42.7077	1.2639	2.02886	0.0023	0.0193178	coding	/
AUR62028938-RA	0h	2h	OK	4.18603	12.0876	1.52987	3.244	5e-05	0.000677386	coding	/
AUR62028958-RA	0h	2h	OK	17.9763	8.91071	-1.01248	-2.50592	5e-05	0.000677386	coding	/
AUR62028964-RA	0h	2h	OK	15.3892	219.393	3.83353	3.84371	5e-05	0.000677386	coding	/
AUR62028981-RA	0h	2h	OK	9.44321	28.6576	1.60157	4.7846	5e-05	0.000677386	coding	/
AUR62028992-RA	0h	2h	OK	1.80039	3.90154	1.11573	1.98989	0.0034	0.0266106	coding	/
AUR62029011-RA	0h	2h	OK	4.05625	10.1169	1.31856	2.89059	5e-05	0.000677386	coding	/
AUR62029028-RA	0h	2h	OK	1.59634	0.535361	-1.57619	-2.55362	0.00025	0.00289824	coding	/
AUR62029120-RA	0h	2h	OK	252.387	47.6302	-2.40569	-8.17103	5e-05	0.000677386	coding	/
AUR62029146-RA	0h	2h	OK	5.67778	1.03718	-2.45266	-2.21942	0.0058	0.0410295	coding	/
AUR62029161-RA	0h	2h	OK	6.11038	13.393	1.13214	2.91588	5e-05	0.000677386	coding	/
AUR62029164-RA	0h	2h	OK	138.709	365.163	1.39648	4.79674	5e-05	0.000677386	coding	/
AUR62029173-RA	0h	2h	OK	1.64255	96.0326	5.86951	8.88873	5e-05	0.000677386	coding	/
AUR62029265-RA	0h	2h	OK	0.789451	2.09404	1.40737	2.10193	0.0015	0.0135722	coding	/
AUR62029273-RA	0h	2h	OK	36.4476	13.8117	-1.39993	-4.35001	5e-05	0.000677386	coding	/
AUR62029281-RA	0h	2h	OK	69.7245	8.63788	-3.01292	-6.73421	5e-05	0.000677386	coding	/
AUR62029326-RA	0h	2h	OK	0.847896	2.67945	1.65998	2.06307	0.0029	0.0232878	coding	/
AUR62029327-RA	0h	2h	OK	6.41258	1.21483	-2.40015	-2.49988	0.00215	0.0182489	coding	/
AUR62029338-RA	0h	2h	OK	15.4977	37.4011	1.27103	3.23315	5e-05	0.000677386	coding	/
AUR62029350-RA	0h	2h	OK	10.3103	1.51408	-2.76758	-2.1507	0.0008	0.00801318	coding	/
AUR62029360-RA	0h	2h	OK	8.53139	3.78024	-1.1743	-2.71621	0.0001	0.00128341	coding	/
AUR62029389-RA	0h	2h	OK	9.75374	2.36973	-2.04123	-4.01129	5e-05	0.000677386	coding	/
AUR62029397-RA	0h	2h	OK	2.45537	8.63869	1.81487	4.68956	5e-05	0.000677386	coding	/
AUR62029403-RA	0h	2h	OK	39.3725	8.86012	-2.15179	-6.30282	5e-05	0.000677386	coding	/
AUR62029417-RA	0h	2h	OK	0.546702	3.34392	2.61271	3.0304	0.0002	0.00238948	coding	/
AUR62029426-RA	0h	2h	OK	15.3836	31.6136	1.03915	2.7644	5e-05	0.000677386	noncoding	LncRNA
AUR62029467-RA	0h	2h	OK	4.24289	14.1136	1.73397	3.46188	5e-05	0.000677386	coding	/
AUR62029500-RA	0h	2h	OK	27.8249	62.4275	1.1658	3.87592	5e-05	0.000677386	coding	/
AUR62029502-RA	0h	2h	OK	7.827	86.185	3.46091	4.25338	5e-05	0.000677386	coding	/
AUR62029535-RA	0h	2h	OK	17.4136	6.58048	-1.40395	-2.24299	0.00135	0.0124223	coding	/
AUR62029627-RA	0h	2h	OK	5.81656	12.7956	1.13741	3.34454	5e-05	0.000677386	coding	/
AUR62029670-RA	0h	2h	OK	1.40538	9.64552	2.7789	4.82785	5e-05	0.000677386	coding	/
AUR62029672-RA	0h	2h	OK	20.5311	49.6233	1.27321	4.32179	5e-05	0.000677386	coding	/
AUR62029678-RA	0h	2h	OK	188.803	60.412	-1.64398	-5.71268	5e-05	0.000677386	coding	/
AUR62029703-RA	0h	2h	OK	35.0679	17.0488	-1.04048	-3.49898	5e-05	0.000677386	coding	/
AUR62029791-RA	0h	2h	OK	18.9487	53.2311	1.49017	4.60177	5e-05	0.000677386	coding	/
AUR62029793-RA	0h	2h	OK	9.66566	4.52899	-1.09368	-3.17051	5e-05	0.000677386	coding	/
AUR62029795-RA	0h	2h	OK	49.5214	5.94605	-3.05805	-5.43027	5e-05	0.000677386	coding	/
AUR62029833-RA	0h	2h	OK	7.01534	17.7878	1.3423	3.75312	5e-05	0.000677386	coding	/
AUR62029843-RA	0h	2h	OK	1.72902	18.5708	3.42501	4.52463	5e-05	0.000677386	coding	/
AUR62029890-RA	0h	2h	OK	0.415206	1.2404	1.57891	2.65464	5e-05	0.000677386	coding	/
AUR62029975-RA	0h	2h	OK	1.82925	0.896444	-1.02897	-1.73838	0.00365	0.0281426	coding	/
AUR62029990-RA	0h	2h	OK	3.04919	0.842053	-1.85644	-1.87471	0.00515	0.037331	coding	/
AUR62030018-RA	0h	2h	OK	1.42393	34.682	4.60624	6.54784	5e-05	0.000677386	coding	/
AUR62030091-RA	0h	2h	OK	14.3238	4.13936	-1.79094	-2.93042	5e-05	0.000677386	coding	/
AUR62030099-RA	0h	2h	OK	1.09058	3.11295	1.51319	3.38696	5e-05	0.000677386	coding	/
AUR62030101-RA	0h	2h	OK	14.0228	5.07107	-1.46741	-2.12946	0.00055	0.00579049	coding	/
AUR62030104-RA	0h	2h	OK	15.2048	43.2066	1.50673	2.49087	5e-05	0.000677386	coding	/
AUR62030130-RA	0h	2h	OK	0.75768	3.38618	2.16	3.91489	5e-05	0.000677386	coding	/
AUR62030132-RA	0h	2h	OK	3.41774	9.58309	1.48745	2.60484	0.0001	0.00128341	coding	/
AUR62030232-RA	0h	2h	OK	11.2394	22.7024	1.01428	2.78345	5e-05	0.000677386	coding	/
AUR62030260-RA	0h	2h	OK	0.508437	3.1486	2.63057	2.89008	0.00075	0.00757795	coding	/
AUR62030326-RA	0h	2h	OK	8.17913	0.781131	-3.38831	-3.93269	5e-05	0.000677386	coding	/
AUR62030330-RA	0h	2h	OK	7.62876	0.716026	-3.41336	-4.302	5e-05	0.000677386	coding	/
AUR62030359-RA	0h	2h	OK	9.50471	21.1575	1.15446	2.91032	5e-05	0.000677386	coding	/
AUR62030360-RA	0h	2h	OK	2.58351	0.68496	-1.91524	-2.63411	0.00035	0.00390194	coding	/
AUR62030385-RA	0h	2h	OK	2.39113	1.15342	-1.05177	-1.69535	0.00505	0.0367389	coding	/
AUR62030388-RA	0h	2h	OK	1.71893	5.72084	1.73471	3.48048	5e-05	0.000677386	coding	/
AUR62030392-RA	0h	2h	OK	0.514881	2.05301	1.99543	4.0228	5e-05	0.000677386	coding	/
AUR62030422-RA	0h	2h	OK	193.077	38.6736	-2.31975	-7.50291	5e-05	0.000677386	coding	/
AUR62030427-RA	0h	2h	OK	0.840672	2.17821	1.37353	1.83761	0.0047	0.0345856	coding	/
AUR62030429-RA	0h	2h	OK	9.71504	37.7952	1.95991	4.39349	5e-05	0.000677386	coding	/
AUR62030446-RA	0h	2h	OK	3.05159	7.54058	1.30511	2.9008	5e-05	0.000677386	coding	/
AUR62030476-RA	0h	2h	OK	15.4895	0.952981	-4.0227	-5.7309	5e-05	0.000677386	coding	/
AUR62030478-RA	0h	2h	OK	318.582	27.1242	-3.55401	-11.0891	5e-05	0.000677386	coding	/
AUR62030503-RA	0h	2h	OK	0	274.405	inf	#NAME?	5e-05	0.000677386	coding	/
AUR62030521-RA	0h	2h	OK	95.5986	32.9909	-1.53492	-3.84701	5e-05	0.000677386	coding	/
AUR62030539-RA	0h	2h	OK	1.12154	19.2184	4.09893	8.56013	5e-05	0.000677386	coding	/
AUR62030568-RA	0h	2h	OK	5.70112	17.6186	1.62778	4.72231	5e-05	0.000677386	coding	/
AUR62030588-RA	0h	2h	OK	4.59389	11.403	1.31163	2.67228	5e-05	0.000677386	coding	/
AUR62030611-RA	0h	2h	OK	81.4601	23.4799	-1.79467	-5.72747	5e-05	0.000677386	coding	/
AUR62030612-RA	0h	2h	OK	40.7081	87.0759	1.09696	3.47085	5e-05	0.000677386	coding	/
AUR62030623-RA	0h	2h	OK	6.72083	33.2842	2.30813	6.15861	5e-05	0.000677386	coding	/
AUR62030661-RA	0h	2h	OK	29.1508	11.4035	-1.35406	-3.62417	5e-05	0.000677386	coding	/
AUR62030677-RA	0h	2h	OK	7.27274	2.08791	-1.80044	-2.10507	0.003	0.0239503	coding	/
AUR62030716-RA	0h	2h	OK	4.23483	38.8608	3.19794	6.75675	5e-05	0.000677386	coding	/
AUR62030734-RA	0h	2h	OK	17.7149	44.6173	1.33264	3.63097	5e-05	0.000677386	coding	/
AUR62030771-RA	0h	2h	OK	113.786	41.256	-1.46365	-3.80963	5e-05	0.000677386	coding	/
AUR62030819-RA	0h	2h	OK	239.026	13.0763	-4.19214	-11.6338	5e-05	0.000677386	coding	/
AUR62030833-RA	0h	2h	OK	66.353	139.266	1.06961	3.45396	5e-05	0.000677386	coding	/
AUR62030839-RA	0h	2h	OK	6.44522	2.56728	-1.32799	-2.71797	5e-05	0.000677386	coding	/
AUR62030899-RA	0h	2h	OK	0.776885	24.5436	4.9815	8.0206	5e-05	0.000677386	coding	/
AUR62030937-RA	0h	2h	OK	3.80339	20.3847	2.42213	5.68766	5e-05	0.000677386	coding	/
AUR62030940-RA	0h	2h	OK	116.379	51.6126	-1.17303	-3.57403	5e-05	0.000677386	coding	/
AUR62030997-RA	0h	2h	OK	5.06996	1.06631	-2.24934	-3.40622	5e-05	0.000677386	coding	/
AUR62031002-RA	0h	2h	OK	1.16245	8.46027	2.86354	3.53031	5e-05	0.000677386	coding	/
AUR62031057-RA	0h	2h	OK	1.2952	4.64042	1.84108	2.64972	0.0001	0.00128341	coding	/
AUR62031064-RA	0h	2h	OK	0.821152	2.14145	1.38286	1.93415	0.00305	0.0242818	coding	/
AUR62031082-RA	0h	2h	OK	7.78931	3.27448	-1.25023	-2.39568	0.00025	0.00289824	coding	/
AUR62031083-RA	0h	2h	OK	45.8173	16.6677	-1.45884	-4.49288	5e-05	0.000677386	coding	/
AUR62031084-RA	0h	2h	OK	116.932	37.7792	-1.63	-5.66335	5e-05	0.000677386	coding	/
AUR62031120-RA	0h	2h	OK	7.73426	1.63492	-2.24205	-3.72002	5e-05	0.000677386	coding	/
AUR62031223-RA	0h	2h	OK	3.48278	0.458685	-2.92466	-2.26496	0.00615	0.04307	coding	/
AUR62031225-RA	0h	2h	OK	7.71139	3.30904	-1.22058	-3.16639	5e-05	0.000677386	coding	/
AUR62031299-RA	0h	2h	OK	27.4064	11.0965	-1.3044	-4.21521	5e-05	0.000677386	coding	/
AUR62031317-RA	0h	2h	OK	4.52098	21.9973	2.28262	5.10133	5e-05	0.000677386	coding	/
AUR62031323-RA	0h	2h	OK	34.9662	97.5932	1.48082	4.86306	5e-05	0.000677386	coding	/
AUR62031329-RA	0h	2h	OK	0	1.70198	inf	#NAME?	0.0001	0.00128341	coding	/
AUR62031363-RA	0h	2h	OK	13.8255	4.28365	-1.69042	-2.78701	5e-05	0.000677386	coding	/
AUR62031392-RA	0h	2h	OK	26.167	10.7736	-1.28025	-4.12368	5e-05	0.000677386	coding	/
AUR62031404-RA	0h	2h	OK	162.412	28.3853	-2.51644	-7.70969	5e-05	0.000677386	coding	/
AUR62031405-RA	0h	2h	OK	6.23698	1.3958	-2.15975	-3.16924	5e-05	0.000677386	coding	/
AUR62031406-RA	0h	2h	OK	362.437	46.1791	-2.97242	-9.69086	5e-05	0.000677386	coding	/
AUR62031408-RA	0h	2h	OK	1.85572	0.421373	-2.13881	-2.73652	5e-05	0.000677386	coding	/
AUR62031415-RA	0h	2h	OK	3.21436	28.0336	3.12455	7.44481	5e-05	0.000677386	coding	/
AUR62031420-RA	0h	2h	OK	5.57046	11.7947	1.08227	2.50022	5e-05	0.000677386	coding	/
AUR62031498-RA	0h	2h	OK	0.500605	3.56221	2.83103	4.61525	5e-05	0.000677386	coding	/
AUR62031507-RA	0h	2h	OK	8.26992	19.1784	1.21354	3.83535	5e-05	0.000677386	coding	/
AUR62031520-RA	0h	2h	OK	24.9969	55.2257	1.14359	3.08425	5e-05	0.000677386	coding	/
AUR62031538-RA	0h	2h	OK	3.94506	1.72974	-1.18949	-2.43963	5e-05	0.000677386	coding	/
AUR62031569-RA	0h	2h	OK	10.1728	108.552	3.4156	2.72406	0.0004	0.00438463	coding	/
AUR62031574-RA	0h	2h	OK	3.16687	6.9664	1.13735	1.77657	0.00245	0.0203335	coding	/
AUR62031588-RA	0h	2h	OK	1.73914	5.93008	1.76967	2.26078	0.00165	0.0146778	coding	/
AUR62031641-RA	0h	2h	OK	149.494	38.6647	-1.951	-6.47924	5e-05	0.000677386	coding	/
AUR62031670-RA	0h	2h	OK	7.24812	15.552	1.10142	2.20117	0.0006	0.00625561	coding	/
AUR62031684-RA	0h	2h	OK	47.736	109.47	1.19739	3.81807	5e-05	0.000677386	coding	/
AUR62031689-RA	0h	2h	OK	2.20789	0.699764	-1.65773	-2.13557	0.00185	0.0161467	coding	/
AUR62031750-RA	0h	2h	OK	2.15246	14.5498	2.75694	5.66048	5e-05	0.000677386	coding	/
AUR62031782-RA	0h	2h	OK	9.08293	42.734	2.23415	7.22167	5e-05	0.000677386	coding	/
AUR62031799-RA	0h	2h	OK	8.58133	2.93041	-1.5501	-3.57068	5e-05	0.000677386	coding	/
AUR62031805-RA	0h	2h	OK	27.0018	88.8046	1.71758	5.65319	5e-05	0.000677386	coding	/
AUR62031816-RA	0h	2h	OK	6.72166	2.92202	-1.20185	-2.76009	5e-05	0.000677386	coding	/
AUR62031824-RA	0h	2h	OK	4.12014	19.5739	2.24817	6.01335	5e-05	0.000677386	coding	/
AUR62031831-RA	0h	2h	OK	16.785	6.09079	-1.46247	-3.06195	5e-05	0.000677386	coding	/
AUR62031833-RA	0h	2h	OK	12.1448	4.56473	-1.41174	-3.30938	5e-05	0.000677386	coding	/
AUR62031907-RA	0h	2h	OK	2.35687	0.99925	-1.23795	-1.85864	0.00355	0.0275055	coding	/
AUR62031908-RA	0h	2h	OK	11.8586	107.657	3.18244	10.7903	5e-05	0.000677386	coding	/
AUR62031939-RA	0h	2h	OK	2.4259	19.2699	2.98976	2.69771	0.00055	0.00579049	coding	/
AUR62031949-RA	0h	2h	OK	8.07191	90.4569	3.48625	9.34835	5e-05	0.000677386	coding	/
AUR62031984-RA	0h	2h	OK	5.71024	1.29407	-2.14163	-3.75592	5e-05	0.000677386	coding	/
AUR62032072-RA	0h	2h	OK	19.1823	57.9206	1.5943	2.74771	0.00015	0.00185128	coding	/
AUR62032080-RA	0h	2h	OK	5.20768	2.27527	-1.1946	-2.59158	5e-05	0.000677386	coding	/
AUR62032113-RA	0h	2h	OK	3.07499	1.01249	-1.60268	-2.82581	5e-05	0.000677386	coding	/
AUR62032135-RA	0h	2h	OK	8.0742	3.88387	-1.05582	-2.39375	5e-05	0.000677386	coding	/
AUR62032166-RA	0h	2h	OK	8.22066	2.56962	-1.6777	-3.71944	5e-05	0.000677386	coding	/
AUR62032181-RA	0h	2h	OK	1.14812	2.87261	1.32309	2.71904	0.00015	0.00185128	coding	/
AUR62032198-RA	0h	2h	OK	2.04394	17.0833	3.06316	6.67594	5e-05	0.000677386	coding	/
AUR62032218-RA	0h	2h	OK	19.2338	38.9255	1.01707	3.49016	5e-05	0.000677386	coding	/
AUR62032228-RA	0h	2h	OK	8.68658	3.63439	-1.25707	-2.54773	5e-05	0.000677386	coding	/
AUR62032258-RA	0h	2h	OK	7.47856	30.37	2.02181	5.63211	5e-05	0.000677386	coding	/
AUR62032288-RA	0h	2h	OK	0.621372	18.1084	4.86506	4.98376	5e-05	0.000677386	coding	/
AUR62032305-RA	0h	2h	OK	5.28208	10.5897	1.00348	2.55404	0.0001	0.00128341	coding	/
AUR62032321-RA	0h	2h	OK	32.3443	118.56	1.87403	2.24834	0.002	0.0171768	noncoding	LncRNA
AUR62032323-RA	0h	2h	OK	14.1144	2.9918	-2.23808	-3.50976	5e-05	0.000677386	coding	/
AUR62032401-RA	0h	2h	OK	64.4315	32.1044	-1.00499	-2.87025	5e-05	0.000677386	coding	/
AUR62032415-RA	0h	2h	OK	72.2331	34.1822	-1.07942	-3.36437	5e-05	0.000677386	coding	/
AUR62032434-RA	0h	2h	OK	3.62828	25.1295	2.79202	7.7711	5e-05	0.000677386	coding	/
AUR62032447-RA	0h	2h	OK	4.25449	1.24888	-1.76835	-3.64852	5e-05	0.000677386	coding	/
AUR62032502-RA	0h	2h	OK	12.7353	6.35215	-1.00352	-3.12393	5e-05	0.000677386	coding	/
AUR62032541-RA	0h	2h	OK	0.552091	2.99587	2.44	3.35157	5e-05	0.000677386	coding	/
AUR62032594-RA	0h	2h	OK	8.19008	18.816	1.20001	3.02041	5e-05	0.000677386	coding	/
AUR62032609-RA	0h	2h	OK	14.9653	4.91592	-1.60609	-3.68919	5e-05	0.000677386	coding	/
AUR62032642-RA	0h	2h	OK	533.614	180.144	-1.56665	-5.32674	5e-05	0.000677386	coding	/
AUR62032645-RA	0h	2h	OK	5.11384	19.5487	1.9346	4.36427	5e-05	0.000677386	coding	/
AUR62032671-RA	0h	2h	OK	3.94879	1.27698	-1.62867	-3.40018	5e-05	0.000677386	coding	/
AUR62032724-RA	0h	2h	OK	22.7132	5.5666	-2.02866	-3.83269	5e-05	0.000677386	coding	/
AUR62032796-RA	0h	2h	OK	5.06439	1.57272	-1.68712	-1.79524	0.00725	0.0490995	coding	/
AUR62032812-RA	0h	2h	OK	44.763	21.2609	-1.0741	-2.55732	5e-05	0.000677386	coding	/
AUR62032816-RA	0h	2h	OK	3.0983	22.1513	2.83784	6.23033	5e-05	0.000677386	coding	/
AUR62032835-RA	0h	2h	OK	2.9926	22.8028	2.92974	6.86762	5e-05	0.000677386	coding	/
AUR62032885-RA	0h	2h	OK	2.49898	0.458479	-2.44641	-3.05836	0.0003	0.00339802	coding	/
AUR62032942-RA	0h	2h	OK	2.00291	14.462	2.8521	3.81331	5e-05	0.000677386	coding	/
AUR62032949-RA	0h	2h	OK	1.27656	7.21757	2.49925	3.83543	5e-05	0.000677386	coding	/
AUR62033037-RA	0h	2h	OK	1.10541	3.01554	1.44783	3.39675	5e-05	0.000677386	coding	/
AUR62033177-RA	0h	2h	OK	125.148	43.0721	-1.53881	-4.8054	5e-05	0.000677386	coding	/
AUR62033179-RA	0h	2h	OK	106.916	39.3171	-1.44325	-4.41518	5e-05	0.000677386	coding	/
AUR62033205-RA	0h	2h	OK	31.166	118.82	1.93074	5.82921	5e-05	0.000677386	coding	/
AUR62033235-RA	0h	2h	OK	10.9265	1.72631	-2.66207	-6.69723	5e-05	0.000677386	coding	/
AUR62033256-RA	0h	2h	OK	18.8943	5.06224	-1.9001	-3.7024	5e-05	0.000677386	coding	/
AUR62033259-RA	0h	2h	OK	10.3305	21.6835	1.06969	3.51147	5e-05	0.000677386	coding	/
AUR62033289-RA	0h	2h	OK	0	6.43337	inf	#NAME?	5e-05	0.000677386	coding	/
AUR62033290-RA	0h	2h	OK	15.5415	54.1899	1.8019	5.78031	5e-05	0.000677386	coding	/
AUR62033296-RA	0h	2h	OK	10.2563	4.12598	-1.3137	-3.32363	5e-05	0.000677386	coding	/
AUR62033299-RA	0h	2h	OK	2.68092	9.74741	1.86229	2.45713	0.00495	0.0361293	coding	/
AUR62033302-RA	0h	2h	OK	8.31135	18.4605	1.15129	2.60944	5e-05	0.000677386	coding	/
AUR62033343-RA	0h	2h	OK	9.73354	4.28963	-1.18211	-1.69301	0.00355	0.0275055	coding	/
AUR62033408-RA	0h	2h	OK	3.942	9.05126	1.19919	2.26164	0.002	0.0171768	coding	/
AUR62033422-RA	0h	2h	OK	1.84194	6.73373	1.87018	1.9669	0.00445	0.0331472	coding	/
AUR62033472-RA	0h	2h	OK	24.6098	69.1746	1.49101	2.84178	5e-05	0.000677386	coding	/
AUR62033474-RA	0h	2h	OK	15.3869	6.9152	-1.15386	-2.74179	5e-05	0.000677386	coding	/
AUR62033527-RA	0h	2h	OK	23.4633	70.0627	1.57824	5.34208	5e-05	0.000677386	coding	/
AUR62033539-RA	0h	2h	OK	26.7164	13.2295	-1.01396	-2.7627	5e-05	0.000677386	coding	/
AUR62033602-RA	0h	2h	OK	27.071	12.5825	-1.10533	-3.55484	5e-05	0.000677386	coding	/
AUR62033605-RA	0h	2h	OK	26.6265	59.2571	1.15413	3.87643	5e-05	0.000677386	coding	/
AUR62033641-RA	0h	2h	OK	71.7511	20.4931	-1.80786	-5.66087	5e-05	0.000677386	coding	/
AUR62033648-RA	0h	2h	OK	6.81779	21.0434	1.62599	4.59799	5e-05	0.000677386	coding	/
AUR62033684-RA	0h	2h	OK	10.2928	4.55599	-1.17581	-2.7669	5e-05	0.000677386	coding	/
AUR62033729-RA	0h	2h	OK	66.5175	20.9433	-1.66724	-4.90179	5e-05	0.000677386	coding	/
AUR62033806-RA	0h	2h	OK	1.53547	15.5543	3.34057	6.67837	5e-05	0.000677386	coding	/
AUR62033821-RA	0h	2h	OK	12.4231	47.3682	1.93089	6.52636	5e-05	0.000677386	coding	/
AUR62033841-RA	0h	2h	OK	2.31764	6.72057	1.53593	2.63156	0.0002	0.00238948	coding	/
AUR62033870-RA	0h	2h	OK	7.93698	44.3842	2.48338	4.01589	5e-05	0.000677386	coding	/
AUR62033898-RA	0h	2h	OK	6.68474	14.3245	1.09954	3.32511	5e-05	0.000677386	coding	/
AUR62033900-RA	0h	2h	OK	110.115	27.6731	-1.99246	-5.82344	5e-05	0.000677386	coding	/
AUR62033906-RA	0h	2h	OK	15.668	32.2068	1.03954	3.04653	5e-05	0.000677386	coding	/
AUR62033911-RA	0h	2h	OK	16.4366	36.601	1.15497	3.91355	5e-05	0.000677386	coding	/
AUR62033914-RA	0h	2h	OK	572.698	221.295	-1.3718	-4.51241	5e-05	0.000677386	noncoding	LncRNA
AUR62033918-RA	0h	2h	OK	35.4704	103.277	1.54182	5.15504	5e-05	0.000677386	coding	/
AUR62033938-RA	0h	2h	OK	3.75438	14.8173	1.98063	5.17743	5e-05	0.000677386	coding	/
AUR62033939-RA	0h	2h	OK	18.8119	4.71369	-1.99671	-3.69824	5e-05	0.000677386	coding	/
AUR62033995-RA	0h	2h	OK	1.44519	7.80877	2.43383	5.65371	5e-05	0.000677386	coding	/
AUR62033996-RA	0h	2h	OK	5.92163	35.2489	2.57351	4.34381	5e-05	0.000677386	coding	/
AUR62034053-RA	0h	2h	OK	19.7507	40.5538	1.03793	2.02531	0.00105	0.0100939	noncoding	LncRNA
AUR62034159-RA	0h	2h	OK	21.3676	7.38109	-1.53352	-3.62828	5e-05	0.000677386	coding	/
AUR62034166-RA	0h	2h	OK	16.1662	3.2828	-2.29998	-4.25965	5e-05	0.000677386	coding	/
AUR62034188-RA	0h	2h	OK	3.30525	37.5765	3.507	4.30607	5e-05	0.000677386	coding	/
AUR62034227-RA	0h	2h	OK	16.9872	7.85777	-1.11226	-2.96207	5e-05	0.000677386	coding	/
AUR62034234-RA	0h	2h	OK	1.0508	2.11593	1.0098	1.69924	0.0054	0.0388484	coding	/
AUR62034284-RA	0h	2h	OK	11.4262	46.5256	2.02568	3.60206	5e-05	0.000677386	coding	/
AUR62034299-RA	0h	2h	OK	17.1161	0.982297	-4.12305	-6.5636	5e-05	0.000677386	coding	/
AUR62034377-RA	0h	2h	OK	1.2248	3.01014	1.29728	2.39044	0.0003	0.00339802	coding	/
AUR62034402-RA	0h	2h	OK	3.56314	1.65796	-1.10374	-1.72671	0.0042	0.0315861	coding	/
AUR62034449-RA	0h	2h	OK	8.44893	2.15692	-1.9698	-2.6338	0.0002	0.00238948	coding	/
AUR62034494-RA	0h	2h	OK	3.67553	16.5437	2.17026	3.55972	5e-05	0.000677386	coding	/
AUR62034513-RA	0h	2h	OK	0.464676	1.90221	2.03338	3.10207	5e-05	0.000677386	coding	/
AUR62034523-RA	0h	2h	OK	0.691393	2.71489	1.97332	2.4383	0.00085	0.00843816	coding	/
AUR62034525-RA	0h	2h	OK	22.3537	6.18622	-1.85338	-4.51355	5e-05	0.000677386	coding	/
AUR62034536-RA	0h	2h	OK	2.89622	18.8894	2.70533	4.8187	5e-05	0.000677386	coding	/
AUR62034548-RA	0h	2h	OK	135.622	38.5389	-1.8152	-6.23902	5e-05	0.000677386	coding	/
AUR62034571-RA	0h	2h	OK	2.1481	8.94155	2.05746	2.22508	0.00395	0.0299984	noncoding	LncRNA
AUR62034576-RA	0h	2h	OK	6.32677	2.69404	-1.2317	-1.78115	0.00625	0.043608	coding	/
AUR62034612-RA	0h	2h	OK	2.87834	8.29886	1.52768	3.1004	5e-05	0.000677386	coding	/
AUR62034615-RA	0h	2h	OK	3.42473	10.7185	1.64605	2.86146	5e-05	0.000677386	coding	/
AUR62034775-RA	0h	2h	OK	1.31648	21.5425	4.03243	6.21754	5e-05	0.000677386	coding	/
AUR62034833-RA	0h	2h	OK	4.13408	1.27108	-1.70152	-2.24642	0.00045	0.00486448	coding	/
AUR62034888-RA	0h	2h	OK	11.6259	69.2777	2.57505	7.81008	5e-05	0.000677386	coding	/
AUR62034966-RA	0h	2h	OK	3.47358	23.3293	2.74764	6.6149	5e-05	0.000677386	coding	/
AUR62035001-RA	0h	2h	OK	22.8328	5.67575	-2.00823	-3.97851	5e-05	0.000677386	noncoding	LncRNA
AUR62035012-RA	0h	2h	OK	43.1739	129.418	1.58381	5.12368	5e-05	0.000677386	coding	/
AUR62035018-RA	0h	2h	OK	17.3887	55.4708	1.67358	5.42058	5e-05	0.000677386	coding	/
AUR62035054-RA	0h	2h	OK	13.2471	4.75007	-1.47966	-2.64062	5e-05	0.000677386	coding	/
AUR62035073-RA	0h	2h	OK	6.77546	28.389	2.06694	5.19394	5e-05	0.000677386	coding	/
AUR62035083-RA	0h	2h	OK	14.1956	6.9564	-1.02903	-2.75293	5e-05	0.000677386	coding	/
AUR62035109-RA	0h	2h	OK	5.75361	12.0071	1.06135	2.23012	0.00025	0.00289824	coding	/
AUR62035120-RA	0h	2h	OK	1.82599	6.42766	1.81562	2.2683	0.0018	0.0157881	coding	/
AUR62035167-RA	0h	2h	OK	0.341241	1.86573	2.45088	2.8717	0.0001	0.00128341	coding	/
AUR62035191-RA	0h	2h	OK	11.3643	3.12127	-1.8643	-3.85712	5e-05	0.000677386	coding	/
AUR62035199-RA	0h	2h	OK	19.6587	46.6718	1.24738	4.03638	5e-05	0.000677386	coding	/
AUR62035241-RA	0h	2h	OK	2.40989	31.7421	3.71936	3.08838	0.0003	0.00339802	coding	/
AUR62035247-RA	0h	2h	OK	0.635157	5.81143	3.19371	4.49626	5e-05	0.000677386	coding	/
AUR62035260-RA	0h	2h	OK	16.6266	5.50853	-1.59375	-3.35341	5e-05	0.000677386	coding	/
AUR62035272-RA	0h	2h	OK	2.57199	6.27088	1.28579	2.46197	0.0001	0.00128341	coding	/
AUR62035279-RA	0h	2h	OK	14.446	43.8104	1.6006	2.12386	0.0009	0.00885854	coding	/
AUR62035285-RA	0h	2h	OK	8.36734	4.09831	-1.02974	-2.19145	0.0005	0.00533502	coding	/
AUR62035287-RA	0h	2h	OK	4.27008	1.70921	-1.32094	-2.38329	0.00025	0.00289824	coding	/
AUR62035296-RA	0h	2h	OK	3.73021	1.05807	-1.81783	-2.87788	0.00015	0.00185128	coding	/
AUR62035297-RA	0h	2h	OK	8.73868	27.0974	1.63267	3.43181	5e-05	0.000677386	coding	/
AUR62035407-RA	0h	2h	OK	14.0509	40.5544	1.52919	5.11532	5e-05	0.000677386	coding	/
AUR62035415-RA	0h	2h	OK	11.7913	4.99159	-1.24016	-2.39872	0.00015	0.00185128	coding	/
AUR62035465-RA	0h	2h	OK	1.1694	3.63188	1.63495	2.34016	0.0005	0.00533502	coding	/
AUR62035466-RA	0h	2h	OK	26.7318	8.81803	-1.60003	-2.97541	5e-05	0.000677386	coding	/
AUR62035501-RA	0h	2h	OK	2.73387	1.18933	-1.20079	-2.02441	0.00175	0.0154215	coding	/
AUR62035541-RA	0h	2h	OK	7.13834	2.10155	-1.76413	-2.05766	0.00245	0.0203335	coding	/
AUR62035553-RA	0h	2h	OK	35.8228	1.36433	-4.71461	-8.29639	5e-05	0.000677386	coding	/
AUR62035587-RA	0h	2h	OK	1.62376	6.43846	1.98738	4.22198	5e-05	0.000677386	coding	/
AUR62035638-RA	0h	2h	OK	13.7108	5.3613	-1.35466	-1.97168	0.0028	0.0226571	coding	/
AUR62035677-RA	0h	2h	OK	1.34944	5.86719	2.12031	4.12825	5e-05	0.000677386	coding	/
AUR62035695-RA	0h	2h	OK	11.2202	25.8621	1.20474	3.91309	5e-05	0.000677386	coding	/
AUR62035739-RA	0h	2h	OK	4.50335	1.77461	-1.3435	-2.3941	5e-05	0.000677386	coding	/
AUR62035758-RA	0h	2h	OK	1.92214	5.91793	1.62238	3.43207	5e-05	0.000677386	coding	/
AUR62035759-RA	0h	2h	OK	17.9303	56.9704	1.66781	5.74321	5e-05	0.000677386	coding	/
AUR62035973-RA	0h	2h	OK	17.4884	2.22096	-2.97714	-7.2061	5e-05	0.000677386	coding	/
AUR62036034-RA	0h	2h	OK	31.2888	13.6649	-1.19517	-3.77303	5e-05	0.000677386	coding	/
AUR62036092-RA	0h	2h	OK	50.0271	7.63745	-2.71155	-7.23642	5e-05	0.000677386	coding	/
AUR62036129-RA	0h	2h	OK	10.7033	22.6154	1.07925	3.44471	5e-05	0.000677386	coding	/
AUR62036144-RA	0h	2h	OK	8.32898	1.60703	-2.37374	-3.09995	0.00025	0.00289824	coding	/
AUR62036178-RA	0h	2h	OK	2.62335	6.67517	1.34739	2.40213	5e-05	0.000677386	coding	/
AUR62036187-RA	0h	2h	OK	3.87389	15.472	1.99781	2.52762	5e-05	0.000677386	coding	/
AUR62036204-RA	0h	2h	OK	103.196	9.10164	-3.50312	-8.82252	5e-05	0.000677386	coding	/
AUR62036206-RA	0h	2h	OK	52.4436	5.12069	-3.35636	-8.38171	5e-05	0.000677386	coding	/
AUR62036209-RA	0h	2h	OK	204.76	441.062	1.10705	3.65793	5e-05	0.000677386	coding	/
AUR62036214-RA	0h	2h	OK	6.59117	2.7202	-1.27682	-1.90501	0.0027	0.021981	coding	/
AUR62036224-RA	0h	2h	OK	35.8344	178.067	2.313	7.25302	5e-05	0.000677386	coding	/
AUR62036235-RA	0h	2h	OK	5.25465	30.3647	2.53073	3.34756	0.0002	0.00238948	coding	/
AUR62036239-RA	0h	2h	OK	21.5789	65.085	1.5927	4.90692	5e-05	0.000677386	coding	/
AUR62036243-RA	0h	2h	OK	3.31938	9.97113	1.58684	2.4948	0.0001	0.00128341	coding	/
AUR62036244-RA	0h	2h	OK	5.71958	13.3515	1.22302	2.87385	5e-05	0.000677386	coding	/
AUR62036275-RA	0h	2h	OK	8.70784	2.53037	-1.78297	-3.28126	5e-05	0.000677386	coding	/
AUR62036285-RA	0h	2h	OK	13.1735	52.3372	1.9902	5.20038	5e-05	0.000677386	coding	/
AUR62036304-RA	0h	2h	OK	44.7785	8.13353	-2.46085	-4.86294	5e-05	0.000677386	coding	/
AUR62036357-RA	0h	2h	OK	6.22857	39.9018	2.67948	7.41256	5e-05	0.000677386	coding	/
AUR62036372-RA	0h	2h	OK	7.43018	16.2558	1.12948	3.44833	5e-05	0.000677386	coding	/
AUR62036437-RA	0h	2h	OK	26.5511	8.71451	-1.60728	-4.45559	5e-05	0.000677386	coding	/
AUR62036442-RA	0h	2h	OK	11.691	4.2344	-1.46516	-2.59688	5e-05	0.000677386	coding	/
AUR62036527-RA	0h	2h	OK	2.52583	7.40291	1.55133	3.51952	5e-05	0.000677386	coding	/
AUR62036529-RA	0h	2h	OK	204.131	98.3939	-1.05285	-3.57953	5e-05	0.000677386	coding	/
AUR62036533-RA	0h	2h	OK	13.7991	33.9196	1.29755	2.26331	0.0002	0.00238948	coding	/
AUR62036554-RA	0h	2h	OK	2.38216	8.49897	1.83502	3.54682	5e-05	0.000677386	coding	/
AUR62036698-RA	0h	2h	OK	54.8848	10.6658	-2.36342	-6.79725	5e-05	0.000677386	coding	/
AUR62036773-RA	0h	2h	OK	2.43085	17.4763	2.84586	7.34019	5e-05	0.000677386	coding	/
AUR62036851-RA	0h	2h	OK	6.74616	18.6788	1.46927	2.17929	0.00045	0.00486448	coding	/
AUR62036891-RA	0h	2h	OK	36.137	17.5276	-1.04385	-3.5442	5e-05	0.000677386	coding	/
AUR62036924-RA	0h	2h	OK	14.1004	6.81339	-1.04929	-2.90326	5e-05	0.000677386	coding	/
AUR62036965-RA	0h	2h	OK	4.88272	23.5114	2.2676	6.93974	5e-05	0.000677386	coding	/
AUR62036975-RA	0h	2h	OK	9.64295	21.7964	1.17654	3.13625	5e-05	0.000677386	coding	/
AUR62036981-RA	0h	2h	OK	55.9631	23.6969	-1.23978	-3.42096	5e-05	0.000677386	coding	/
AUR62037041-RA	0h	2h	OK	1.12068	7.15875	2.67534	4.48134	5e-05	0.000677386	coding	/
AUR62037134-RA	0h	2h	OK	36.8363	13.8916	-1.40691	-3.46881	5e-05	0.000677386	coding	/
AUR62037161-RA	0h	2h	OK	38.2526	108.809	1.50817	4.56999	5e-05	0.000677386	coding	/
AUR62037164-RA	0h	2h	OK	602.501	293.473	-1.03774	-3.2791	5e-05	0.000677386	coding	/
AUR62037212-RA	0h	2h	OK	9.66709	27.0626	1.48515	4.17668	5e-05	0.000677386	coding	/
AUR62037213-RA	0h	2h	OK	10.2384	20.5873	1.00776	2.78669	5e-05	0.000677386	coding	/
AUR62037225-RA	0h	2h	OK	6.07534	24.928	2.03673	5.13957	5e-05	0.000677386	coding	/
AUR62037248-RA	0h	2h	OK	1.6214	10.4033	2.68173	5.97593	5e-05	0.000677386	coding	/
AUR62037273-RA	0h	2h	OK	16.1323	5.82105	-1.4706	-3.6511	5e-05	0.000677386	coding	/
AUR62037338-RA	0h	2h	OK	5.80016	19.3395	1.73738	5.03488	5e-05	0.000677386	coding	/
AUR62037346-RA	0h	2h	OK	3.32532	19.6896	2.56587	4.63205	5e-05	0.000677386	coding	/
AUR62037347-RA	0h	2h	OK	1.81497	24.5803	3.75949	5.82992	5e-05	0.000677386	coding	/
AUR62037351-RA	0h	2h	OK	27.449	9.21764	-1.57429	-3.24717	5e-05	0.000677386	coding	/
AUR62037361-RA	0h	2h	OK	35.0855	11.6601	-1.5893	-4.80937	5e-05	0.000677386	coding	/
AUR62037440-RA	0h	2h	OK	1.59729	5.15147	1.68936	3.03045	5e-05	0.000677386	coding	/
AUR62037507-RA	0h	2h	OK	75.6207	37.4907	-1.01225	-3.31643	5e-05	0.000677386	coding	/
AUR62037525-RA	0h	2h	OK	4.73143	10.2891	1.12077	2.49907	5e-05	0.000677386	coding	/
AUR62037537-RA	0h	2h	OK	3.81276	1.80507	-1.07878	-1.82274	0.0035	0.0272092	coding	/
AUR62037554-RA	0h	2h	OK	14.7322	5.19432	-1.50396	-3.3074	5e-05	0.000677386	coding	/
AUR62037807-RA	0h	2h	OK	7.87184	1.90304	-2.0484	-3.63494	5e-05	0.000677386	coding	/
AUR62037813-RA	0h	2h	OK	25.7519	6.41052	-2.00617	-4.17896	5e-05	0.000677386	coding	/
AUR62037869-RA	0h	2h	OK	46.6782	128.191	1.45747	5.06095	5e-05	0.000677386	coding	/
AUR62037896-RA	0h	2h	OK	25.9607	5.38344	-2.26973	-6.52191	5e-05	0.000677386	coding	/
AUR62037988-RA	0h	2h	OK	10.416	4.98448	-1.06329	-2.41425	0.0002	0.00238948	coding	/
AUR62038007-RA	0h	2h	OK	2.1103	16.881	2.99988	6.71207	5e-05	0.000677386	coding	/
AUR62038022-RA	0h	2h	OK	16.7665	4.76592	-1.81476	-2.91192	5e-05	0.000677386	coding	/
AUR62038070-RA	0h	2h	OK	4.25214	1.42564	-1.57658	-2.59334	0.0001	0.00128341	coding	/
AUR62038103-RA	0h	2h	OK	10.7321	169.689	3.98289	12.2375	5e-05	0.000677386	coding	/
AUR62038132-RA	0h	2h	OK	0.785567	1.99324	1.34331	1.96817	0.0021	0.0179028	coding	/
AUR62038178-RA	0h	2h	OK	1.40677	0.266962	-2.39768	-2.61342	0.0007	0.00713988	coding	/
AUR62038183-RA	0h	2h	OK	259.561	76.8852	-1.7553	-4.7039	5e-05	0.000677386	coding	/
AUR62038195-RA	0h	2h	OK	15.6915	5.20464	-1.59211	-3.68641	5e-05	0.000677386	coding	/
AUR62038203-RA	0h	2h	OK	4.75351	10.9744	1.20707	2.2765	0.00025	0.00289824	coding	/
AUR62038209-RA	0h	2h	OK	6.86037	2.14764	-1.67554	-2.2004	0.00075	0.00757795	coding	/
AUR62038210-RA	0h	2h	OK	4.73582	29.6178	2.64478	2.55985	0.00065	0.00669571	coding	/
AUR62038224-RA	0h	2h	OK	16.8977	2.18187	-2.95319	-7.1409	5e-05	0.000677386	coding	/
AUR62038240-RA	0h	2h	OK	2.32564	22.244	3.25772	6.61728	5e-05	0.000677386	coding	/
AUR62038254-RA	0h	2h	OK	3.52391	7.06088	1.00267	2.36335	0.0001	0.00128341	coding	/
AUR62038317-RA	0h	2h	OK	78.9766	22.5678	-1.80716	-4.93582	5e-05	0.000677386	coding	/
AUR62038383-RA	0h	2h	OK	0.651387	11.9921	4.20243	3.93831	0.0004	0.00438463	coding	/
AUR62038512-RA	0h	2h	OK	0.275714	4.01864	3.86546	3.91764	0.00025	0.00289824	coding	/
AUR62038545-RA	0h	2h	OK	2.04392	4.81337	1.23571	2.4419	0.0001	0.00128341	coding	/
AUR62038613-RA	0h	2h	OK	2.01257	0.369312	-2.44613	-2.73453	0.0006	0.00625561	coding	/
AUR62038615-RA	0h	2h	OK	50.1755	127.727	1.34801	4.66054	5e-05	0.000677386	coding	/
AUR62038631-RA	0h	2h	OK	10.1064	127.481	3.65693	11.784	5e-05	0.000677386	coding	/
AUR62038685-RA	0h	2h	OK	1.02998	2.55153	1.30874	2.65845	0.0002	0.00238948	coding	/
AUR62038688-RA	0h	2h	OK	2.6235	8.70556	1.73044	3.83478	5e-05	0.000677386	coding	/
AUR62038702-RA	0h	2h	OK	2.5163	0.826374	-1.60644	-2.96201	5e-05	0.000677386	coding	/
AUR62038705-RA	0h	2h	OK	5.93502	1.49173	-1.99227	-3.70755	5e-05	0.000677386	coding	/
AUR62038743-RA	0h	2h	OK	34.6764	3.77631	-3.19891	-3.10824	0.00075	0.00757795	coding	/
AUR62038754-RA	0h	2h	OK	60.1621	18.6507	-1.68963	-5.60999	5e-05	0.000677386	coding	/
AUR62038773-RA	0h	2h	OK	5.76808	2.70696	-1.09142	-1.71642	0.0045	0.0334369	coding	/
AUR62038778-RA	0h	2h	OK	14.061	33.6322	1.25815	3.96107	5e-05	0.000677386	coding	/
AUR62038783-RA	0h	2h	OK	22.3574	9.04473	-1.3056	-3.74495	5e-05	0.000677386	coding	/
AUR62038872-RA	0h	2h	OK	68.4219	23.5588	-1.53819	-5.00433	5e-05	0.000677386	coding	/
AUR62038883-RA	0h	2h	OK	16.8958	43.1707	1.35339	3.49204	5e-05	0.000677386	coding	/
AUR62038889-RA	0h	2h	OK	2.26072	5.1589	1.19028	1.94339	0.0014	0.012806	coding	/
AUR62038909-RA	0h	2h	OK	10.5612	2.80659	-1.91188	-2.36743	0.0034	0.0266106	coding	/
AUR62038958-RA	0h	2h	OK	3.7672	1.21268	-1.6353	-3.35555	5e-05	0.000677386	coding	/
AUR62038960-RA	0h	2h	OK	28.1578	4.47253	-2.65437	-6.05652	5e-05	0.000677386	coding	/
AUR62039057-RA	0h	2h	OK	2.01485	0.5009	-2.00807	-3.28058	5e-05	0.000677386	coding	/
AUR62039097-RA	0h	2h	OK	3.47757	12.7596	1.87544	3.37733	5e-05	0.000677386	coding	/
AUR62039129-RA	0h	2h	OK	4.92153	11.5831	1.23484	1.85788	0.00125	0.0116662	coding	/
AUR62039186-RA	0h	2h	OK	2.77721	0.681084	-2.02773	-2.05281	0.00505	0.0367389	coding	/
AUR62039202-RA	0h	2h	OK	73.728	5.12406	-3.84685	-8.88435	5e-05	0.000677386	coding	/
AUR62039208-RA	0h	2h	OK	6.38831	0.58246	-3.4552	-4.33724	5e-05	0.000677386	coding	/
AUR62039233-RA	0h	2h	OK	0.543214	24.5121	5.49583	4.41486	0.00165	0.0146778	coding	/
AUR62039237-RA	0h	2h	OK	3.76213	11.7621	1.64452	3.52352	5e-05	0.000677386	coding	/
AUR62039284-RA	0h	2h	OK	7.06698	2.79832	-1.33653	-2.09025	0.00065	0.00669571	coding	/
AUR62039312-RA	0h	2h	OK	5.75214	18.0781	1.65207	4.49961	5e-05	0.000677386	coding	/
AUR62039336-RA	0h	2h	OK	2.85604	25.4194	3.15384	7.34714	5e-05	0.000677386	coding	/
AUR62039339-RA	0h	2h	OK	2.78335	0.725586	-1.9396	-2.44819	0.00085	0.00843816	coding	/
AUR62039364-RA	0h	2h	OK	32.0295	5.77493	-2.47153	-6.53815	5e-05	0.000677386	coding	/
AUR62039370-RA	0h	2h	OK	1.15204	3.95928	1.78104	1.84011	0.0047	0.0345856	coding	/
AUR62039376-RA	0h	2h	OK	8.08362	31.7188	1.97227	4.63506	5e-05	0.000677386	coding	/
AUR62039398-RA	0h	2h	OK	4.3566	17.9844	2.04547	4.83254	5e-05	0.000677386	coding	/
AUR62039406-RA	0h	2h	OK	8.07305	24.2359	1.58596	4.1228	5e-05	0.000677386	coding	/
AUR62039431-RA	0h	2h	OK	2.90811	21.3162	2.87379	6.52796	5e-05	0.000677386	coding	/
AUR62039436-RA	0h	2h	OK	38.4	9.30949	-2.04433	-5.73598	5e-05	0.000677386	coding	/
AUR62039450-RA	0h	2h	OK	24.5773	6.65202	-1.88546	-2.82566	5e-05	0.000677386	coding	/
AUR62039458-RA	0h	2h	OK	6.79132	3.34961	-1.0197	-1.68013	0.0058	0.0410295	noncoding	LncRNA
AUR62039570-RA	0h	2h	OK	3.05086	0.960413	-1.66749	-2.92551	5e-05	0.000677386	coding	/
AUR62039573-RA	0h	2h	OK	26.1145	12.3344	-1.08216	-3.41804	5e-05	0.000677386	coding	/
AUR62039610-RA	0h	2h	OK	46.1751	7.45593	-2.63065	-7.45712	5e-05	0.000677386	coding	/
AUR62039611-RA	0h	2h	OK	67.9417	24.042	-1.49874	-4.52441	5e-05	0.000677386	coding	/
AUR62039639-RA	0h	2h	OK	18.6004	5.24039	-1.82759	-1.67599	0.00695	0.0473931	coding	/
AUR62039641-RA	0h	2h	OK	1320.63	344.852	-1.93718	-6.11255	5e-05	0.000677386	coding	/
AUR62039694-RA	0h	2h	OK	13.4901	1.96786	-2.7772	-4.81921	5e-05	0.000677386	coding	/
AUR62039707-RA	0h	2h	OK	1.03135	2.78207	1.43163	3.20981	5e-05	0.000677386	coding	/
AUR62039708-RA	0h	2h	OK	0.321889	1.42201	2.14329	3.60345	5e-05	0.000677386	coding	/
AUR62039721-RA	0h	2h	OK	2.72967	7.04412	1.36769	1.9151	0.00245	0.0203335	coding	/
AUR62039734-RA	0h	2h	OK	12.2545	36.5516	1.57662	3.86407	5e-05	0.000677386	coding	/
AUR62039737-RA	0h	2h	OK	13.9522	3.79976	-1.87651	-4.68095	5e-05	0.000677386	coding	/
AUR62039758-RA	0h	2h	OK	40.9299	109.914	1.42515	4.84003	5e-05	0.000677386	coding	/
AUR62039772-RA	0h	2h	OK	1.6323	0.493293	-1.72639	-1.95703	0.0052	0.037639	coding	/
AUR62039855-RA	0h	2h	OK	57.5409	9.25831	-2.63577	-5.78285	5e-05	0.000677386	coding	/
AUR62039860-RA	0h	2h	OK	1177.81	193.318	-2.60706	-8.12425	5e-05	0.000677386	coding	/
AUR62039879-RA	0h	2h	OK	152.759	542.206	1.82759	5.78691	5e-05	0.000677386	coding	/
AUR62039934-RA	0h	2h	OK	6.10188	35.4293	2.53762	7.73715	5e-05	0.000677386	coding	/
AUR62039947-RA	0h	2h	OK	882.394	195.755	-2.17237	-7.33727	5e-05	0.000677386	coding	/
AUR62039948-RA	0h	2h	OK	301.671	94.6046	-1.67299	-5.27659	5e-05	0.000677386	noncoding	LncRNA
AUR62039950-RA	0h	2h	OK	345.38	56.8868	-2.60202	-7.67765	5e-05	0.000677386	coding	/
AUR62039952-RA	0h	2h	OK	100.801	208.98	1.05185	3.67356	5e-05	0.000677386	coding	/
AUR62039975-RA	0h	2h	OK	2.38039	21.2658	3.15926	9.00058	5e-05	0.000677386	coding	/
AUR62040039-RA	0h	2h	OK	6.62092	1.74917	-1.92036	-3.71957	5e-05	0.000677386	coding	/
AUR62040043-RA	0h	2h	OK	2.7428	8.30899	1.59903	1.882	0.00485	0.0355114	noncoding	LncRNA
AUR62040103-RA	0h	2h	OK	6.57076	79.547	3.59768	5.74064	5e-05	0.000677386	coding	/
AUR62040182-RA	0h	2h	OK	0.935576	4.61724	2.3031	2.94872	0.0002	0.00238948	coding	/
AUR62040194-RA	0h	2h	OK	2.05435	0.396296	-2.37403	-2.63834	0.00075	0.00757795	coding	/
AUR62040250-RA	0h	2h	OK	1.1283	5.53921	2.29553	3.30989	5e-05	0.000677386	coding	/
AUR62040255-RA	0h	2h	OK	8.8545	0.75522	-3.55144	-5.83831	5e-05	0.000677386	coding	/
AUR62040257-RA	0h	2h	OK	4.01628	1.54055	-1.38241	-2.9894	5e-05	0.000677386	coding	/
AUR62040260-RA	0h	2h	OK	66.0485	162.54	1.2992	4.46458	5e-05	0.000677386	coding	/
AUR62040267-RA	0h	2h	OK	1.97745	4.06445	1.03942	2.31144	0.0001	0.00128341	coding	/
AUR62040284-RA	0h	2h	OK	1.85034	5.05336	1.44945	3.74925	5e-05	0.000677386	coding	/
AUR62040310-RA	0h	2h	OK	67.8329	219.05	1.6912	5.85828	5e-05	0.000677386	coding	/
AUR62040406-RA	0h	2h	OK	11.7376	5.52469	-1.08717	-2.88989	5e-05	0.000677386	coding	/
AUR62040436-RA	0h	2h	OK	2.44474	0.941747	-1.37627	-2.00732	0.0016	0.0143007	coding	/
AUR62040449-RA	0h	2h	OK	135.529	435.867	1.68529	5.71646	5e-05	0.000677386	coding	/
AUR62040467-RA	0h	2h	OK	244.404	605.47	1.30879	4.04116	5e-05	0.000677386	coding	/
AUR62040476-RA	0h	2h	OK	0.790726	2.69865	1.77099	2.29954	0.00125	0.0116662	coding	/
AUR62040553-RA	0h	2h	OK	8.46576	3.68213	-1.2011	-3.45884	5e-05	0.000677386	coding	/
AUR62040563-RA	0h	2h	OK	139.56	25.8871	-2.43058	-8.30521	5e-05	0.000677386	coding	/
AUR62040595-RA	0h	2h	OK	118.394	309.428	1.38601	2.98982	5e-05	0.000677386	coding	/
AUR62040598-RA	0h	2h	OK	3.11975	26.7028	3.09749	4.49639	5e-05	0.000677386	coding	/
AUR62040607-RA	0h	2h	OK	1.02081	7.98349	2.96731	2.18242	0.0052	0.037639	coding	/
AUR62040660-RA	0h	2h	OK	1.92292	13.9322	2.85705	5.65176	5e-05	0.000677386	coding	/
AUR62040679-RA	0h	2h	OK	5.89607	15.4549	1.39024	3.74854	5e-05	0.000677386	coding	/
AUR62040699-RA	0h	2h	OK	24.9022	115.956	2.21924	7.47404	5e-05	0.000677386	coding	/
AUR62040718-RA	0h	2h	OK	6.06169	2.09882	-1.53014	-3.48407	5e-05	0.000677386	coding	/
AUR62040719-RA	0h	2h	OK	5.56237	2.58632	-1.1048	-1.60576	0.0053	0.0382341	coding	/
AUR62040806-RA	0h	2h	OK	33.1545	12.4082	-1.41791	-1.80828	0.0027	0.021981	coding	/
AUR62040844-RA	0h	2h	OK	1.74701	5.27439	1.59412	2.71517	0.00015	0.00185128	coding	/
AUR62040851-RA	0h	2h	OK	10.4246	4.16146	-1.32483	-2.16016	0.00045	0.00486448	coding	/
AUR62040941-RA	0h	2h	OK	2.14097	12.7583	2.5751	2.08566	0.0021	0.0179028	coding	/
AUR62040969-RA	0h	2h	OK	45.0988	108.504	1.26659	1.86759	0.00135	0.0124223	coding	/
AUR62040993-RA	0h	2h	OK	16.8883	6.54248	-1.36812	-3.76206	5e-05	0.000677386	coding	/
AUR62040996-RA	0h	2h	OK	16.1083	1.9217	-3.06735	-5.28865	5e-05	0.000677386	coding	/
AUR62041046-RA	0h	2h	OK	13.0946	6.36429	-1.0409	-2.95562	5e-05	0.000677386	coding	/
AUR62041149-RA	0h	2h	OK	4.12791	12.1247	1.55446	2.08918	0.00365	0.0281426	coding	/
AUR62041156-RA	0h	2h	OK	8.55318	4.13957	-1.04698	-2.69275	5e-05	0.000677386	coding	/
AUR62041204-RA	0h	2h	OK	65.6718	32.4981	-1.01492	-2.53263	5e-05	0.000677386	coding	/
AUR62041223-RA	0h	2h	OK	5.13477	0	#NAME?	#NAME?	5e-05	0.000677386	coding	/
AUR62041243-RA	0h	2h	OK	2.90081	15.7379	2.43972	4.55157	5e-05	0.000677386	coding	/
AUR62041295-RA	0h	2h	OK	69.3514	0	#NAME?	#NAME?	0.00025	0.00289824	noncoding	LncRNA
AUR62041395-RA	0h	2h	OK	12.3304	35.522	1.52649	3.9476	5e-05	0.000677386	coding	/
AUR62041408-RA	0h	2h	OK	51.5376	25.7413	-1.00154	-3.14835	5e-05	0.000677386	coding	/
AUR62041427-RA	0h	2h	OK	30.2198	1.67911	-4.16973	-8.1165	5e-05	0.000677386	coding	/
AUR62041431-RA	0h	2h	OK	4.27594	1.46134	-1.54895	-3.16964	5e-05	0.000677386	coding	/
AUR62041453-RA	0h	2h	OK	33.4591	91.546	1.4521	4.9528	5e-05	0.000677386	coding	/
AUR62041457-RA	0h	2h	OK	8.02248	24.5017	1.61076	4.18296	5e-05	0.000677386	coding	/
AUR62041510-RA	0h	2h	OK	20.9958	10.2154	-1.03936	-3.18436	5e-05	0.000677386	coding	/
AUR62041547-RA	0h	2h	OK	5.46164	2.41623	-1.17658	-1.83062	0.00185	0.0161467	coding	/
AUR62041590-RA	0h	2h	OK	4.54681	14.3737	1.6605	3.03031	5e-05	0.000677386	coding	/
AUR62041716-RA	0h	2h	OK	25.1725	100.006	1.99016	5.85226	5e-05	0.000677386	coding	/
AUR62041853-RA	0h	2h	OK	5.01945	2.30486	-1.12285	-2.55716	5e-05	0.000677386	coding	/
AUR62041860-RA	0h	2h	OK	2.73383	0.639678	-2.0955	-2.81585	5e-05	0.000677386	coding	/
AUR62041908-RA	0h	2h	OK	2.28806	7.01181	1.61566	3.1778	5e-05	0.000677386	coding	/
AUR62041911-RA	0h	2h	OK	3.45603	26.0098	2.91187	3.92008	5e-05	0.000677386	coding	/
AUR62041960-RA	0h	2h	OK	2.60304	43.515	4.06324	10.6122	5e-05	0.000677386	coding	/
AUR62041974-RA	0h	2h	OK	0.495939	2.07973	2.06816	2.66226	0.0002	0.00238948	coding	/
AUR62042025-RA	0h	2h	OK	4.8322	1.67848	-1.52553	-3.87725	5e-05	0.000677386	coding	/
AUR62042047-RA	0h	2h	OK	2.95085	14.3244	2.27927	5.90412	5e-05	0.000677386	coding	/
AUR62042063-RA	0h	2h	OK	4.30755	0.775958	-2.47282	-3.30656	0.00015	0.00185128	coding	/
AUR62042071-RA	0h	2h	OK	6.48182	1.82021	-1.83229	-3.61116	5e-05	0.000677386	coding	/
AUR62042086-RA	0h	2h	OK	10.4157	182.563	4.13156	12.7279	5e-05	0.000677386	coding	/
AUR62042267-RA	0h	2h	OK	231.865	58.4834	-1.98719	-6.6116	5e-05	0.000677386	coding	/
AUR62042288-RA	0h	2h	OK	3.79387	10.8546	1.51657	4.42196	5e-05	0.000677386	coding	/
AUR62042330-RA	0h	2h	OK	40.0649	6.88555	-2.54069	-6.87084	5e-05	0.000677386	coding	/
AUR62042339-RA	0h	2h	OK	6.8299	2.09043	-1.70807	-5.01227	5e-05	0.000677386	noncoding	LncRNA
AUR62042343-RA	0h	2h	OK	15.7741	5.27073	-1.58149	-2.31581	0.00075	0.00757795	coding	/
AUR62042345-RA	0h	2h	OK	25.9717	11.7393	-1.1456	-3.96346	5e-05	0.000677386	coding	/
AUR62042396-RA	0h	2h	OK	17.6562	0.756707	-4.5443	-6.50931	5e-05	0.000677386	coding	/
AUR62042429-RA	0h	2h	OK	79.2887	33.8134	-1.22952	-2.14944	0.00095	0.00927935	coding	/
AUR62042527-RA	0h	2h	OK	13.8761	44.6194	1.68507	4.93713	5e-05	0.000677386	coding	/
AUR62042562-RA	0h	2h	OK	3.58553	1.4703	-1.28608	-2.41431	0.0001	0.00128341	coding	/
AUR62042705-RA	0h	2h	OK	7.19807	1.47784	-2.28412	-4.01512	5e-05	0.000677386	coding	/
AUR62042706-RA	0h	2h	OK	4.91173	1.62263	-1.5979	-2.8461	5e-05	0.000677386	coding	/
AUR62042734-RA	0h	2h	OK	6.63449	2.92506	-1.18152	-2.92369	5e-05	0.000677386	coding	/
AUR62042752-RA	0h	2h	OK	1.45581	14.1635	3.28228	5.60917	5e-05	0.000677386	coding	/
AUR62042795-RA	0h	2h	OK	4.70569	11.466	1.28489	3.44009	5e-05	0.000677386	coding	/
AUR62042808-RA	0h	2h	OK	6.62218	0.561159	-3.56082	-4.34201	5e-05	0.000677386	coding	/
AUR62042824-RA	0h	2h	OK	5.41415	11.1148	1.03767	2.14552	0.0005	0.00533502	coding	/
AUR62042931-RA	0h	2h	OK	0.424716	5.35335	3.65587	4.48726	5e-05	0.000677386	coding	/
AUR62042941-RA	0h	2h	OK	3.63058	45.1776	3.63734	6.18482	5e-05	0.000677386	coding	/
AUR62043226-RA	0h	2h	OK	2.53826	0.249038	-3.3494	-2.4367	0.00655	0.0452604	coding	/
AUR62043297-RA	0h	2h	OK	59.4619	13.4876	-2.14033	-7.11152	5e-05	0.000677386	coding	/
AUR62043377-RA	0h	2h	OK	7.62714	2.50907	-1.60399	-2.57562	0.0002	0.00238948	coding	/
AUR62043390-RA	0h	2h	OK	22.0383	4.38521	-2.3293	-5.75518	5e-05	0.000677386	coding	/
AUR62043594-RA	0h	2h	OK	54.4447	224.68	2.04501	4.09185	5e-05	0.000677386	coding	/
AUR62043595-RA	0h	2h	OK	16.7825	39.5217	1.23569	3.72552	5e-05	0.000677386	coding	/
AUR62043868-RA	0h	2h	OK	5.5855	2.19286	-1.34887	-2.77737	5e-05	0.000677386	coding	/
AUR62044070-RA	0h	2h	OK	2.42245	6.68286	1.464	2.7055	5e-05	0.000677386	coding	/
AUR62044177-RA	0h	2h	OK	1.67342	7.35754	2.13642	2.24219	0.001	0.00969691	coding	/
AUR62044180-RA	0h	2h	OK	2.93194	1.40456	-1.06174	-2.11507	0.0005	0.00533502	coding	/
AUR62044352-RA	0h	2h	OK	1.90231	3.97195	1.06209	2.25304	0.0002	0.00238948	coding	/
AUR62044368-RA	0h	2h	OK	50.9874	23.236	-1.13378	-3.83393	5e-05	0.000677386	coding	/
AUR62044372-RA	0h	2h	OK	0.16204	2.25161	3.79654	3.04542	0.00075	0.00757795	coding	/
AUR62044375-RA	0h	2h	OK	8.42279	2.51886	-1.74153	-2.96026	5e-05	0.000677386	coding	/
AUR62044469-RA	0h	2h	OK	2.81241	1.34363	-1.06568	-2.12816	0.00095	0.00927935	coding	/
AUR62044493-RA	0h	2h	OK	3.55888	0.902423	-1.97955	-2.25808	0.00135	0.0124223	coding	/
AUR62044552-RA	0h	2h	OK	1.26853	7.33814	2.53226	3.55708	5e-05	0.000677386	coding	/
AUR62044674-RA	0h	2h	OK	0.623996	37.9266	5.92553	8.46308	5e-05	0.000677386	coding	/
MSTRG.100088.1	0h	2h	OK	1.42058	0.3431	-2.04978	-2.26668	0.00225	0.0189666	coding	/
MSTRG.100131.1	0h	2h	OK	0	6.91743	inf	#NAME?	0.0066	0.0454909	noncoding	LncRNA
MSTRG.100146.1	0h	2h	OK	0.666656	1.77436	1.41228	1.71119	0.00735	0.0496649	noncoding	LncRNA
MSTRG.100167.2	0h	2h	OK	3.11185	7.98187	1.35895	2.4104	0.0002	0.00238948	noncoding	LncRNA
MSTRG.100174.1	0h	2h	OK	2.51065	1.01974	-1.29985	-2.18587	0.00065	0.00669571	coding	/
MSTRG.100190.1	0h	2h	OK	16.0668	63.5883	1.98468	6.4697	5e-05	0.000677386	coding	/
MSTRG.100281.1	0h	2h	OK	0.157428	1.61938	3.36267	3.3669	0.0007	0.00713988	coding	/
MSTRG.10036.2	0h	2h	OK	6.44224	2.62614	-1.29462	-2.9403	5e-05	0.000677386	coding	/
MSTRG.100416.1	0h	2h	OK	5.8498	2.13637	-1.45323	-2.06913	0.00095	0.00927935	coding	/
MSTRG.100467.4	0h	2h	OK	2.22255	6.06988	1.44945	1.94801	0.00195	0.0168315	coding	/
MSTRG.10048.1	0h	2h	OK	5.37413	14.0011	1.38143	3.4178	5e-05	0.000677386	noncoding	LncRNA
MSTRG.100514.1	0h	2h	OK	13.0738	41.0681	1.65134	4.05191	5e-05	0.000677386	noncoding	LncRNA
MSTRG.100598.1	0h	2h	OK	0.938499	3.1386	1.7417	2.46986	0.00105	0.0100939	coding	/
MSTRG.10072.1	0h	2h	OK	9.19288	31.8824	1.79417	2.02078	0.00125	0.0116662	noncoding	LncRNA
MSTRG.100884.1	0h	2h	OK	504.44	1409.45	1.48237	2.71805	5e-05	0.000677386	noncoding	LncRNA
MSTRG.101011.1	0h	2h	OK	17.6471	68.9634	1.9664	5.84648	5e-05	0.000677386	noncoding	LncRNA
MSTRG.101083.1	0h	2h	OK	2.13743	5.65503	1.40366	2.3224	0.00025	0.00289824	coding	/
MSTRG.101125.1	0h	2h	OK	5.19362	10.4561	1.00953	2.21563	0.00035	0.00390194	noncoding	LncRNA
MSTRG.101530.1	0h	2h	OK	5.52526	2.40007	-1.20296	-2.80153	5e-05	0.000677386	coding	/
MSTRG.101542.1	0h	2h	OK	2.75202	5.92526	1.10639	2.14166	0.00055	0.00579049	coding	/
MSTRG.10158.1	0h	2h	OK	0.51189	1.41632	1.46825	3.45258	5e-05	0.000677386	noncoding	LncRNA
MSTRG.101672.1	0h	2h	OK	13.6978	6.74714	-1.0216	-2.75422	5e-05	0.000677386	coding	/
MSTRG.101768.3	0h	2h	OK	0.18235	1.98484	3.44424	3.02524	0.0002	0.00238948	noncoding	LncRNA
MSTRG.101768.4	0h	2h	OK	0.563374	5.47385	3.28039	4.36919	5e-05	0.000677386	coding	/
MSTRG.101778.1	0h	2h	OK	5.32927	0.288248	-4.20855	-4.79902	5e-05	0.000677386	noncoding	LncRNA
MSTRG.102016.1	0h	2h	OK	1.70404	0.841522	-1.01788	-1.62893	0.0071	0.0482193	noncoding	LncRNA
MSTRG.10213.1	0h	2h	OK	6.09366	2.3672	-1.36413	-3.22424	5e-05	0.000677386	noncoding	LncRNA
MSTRG.102145.1	0h	2h	OK	0.943698	5.94569	2.65545	4.24437	5e-05	0.000677386	coding	/
MSTRG.102154.2	0h	2h	OK	1.82084	6.83034	1.90736	3.50891	5e-05	0.000677386	coding	/
MSTRG.102258.1	0h	2h	OK	0.678612	7.59032	3.4835	3.86622	5e-05	0.000677386	coding	/
MSTRG.102258.2	0h	2h	OK	0.506826	5.95197	3.55381	3.11259	0.0004	0.00438463	coding	/
MSTRG.102258.3	0h	2h	OK	0.63424	5.51245	3.11959	4.33994	5e-05	0.000677386	coding	/
MSTRG.102293.1	0h	2h	OK	6.71012	1.54003	-2.12338	-4.22626	5e-05	0.000677386	coding	/
MSTRG.102300.1	0h	2h	OK	23.5297	8.7563	-1.42609	-3.87079	5e-05	0.000677386	coding	/
MSTRG.102355.2	0h	2h	OK	1.47177	6.75816	2.19908	3.18672	5e-05	0.000677386	coding	/
MSTRG.102681.2	0h	2h	OK	33.2437	14.6803	-1.1792	-2.02818	0.00055	0.00579049	noncoding	LncRNA
MSTRG.10277.1	0h	2h	OK	2.37647	0.745847	-1.67187	-2.32086	0.0009	0.00885854	noncoding	LncRNA
MSTRG.10279.1	0h	2h	OK	12.5393	5.22453	-1.26308	-2.88029	5e-05	0.000677386	noncoding	LncRNA
MSTRG.102832.1	0h	2h	OK	3.83922	9.16834	1.25585	3.13321	5e-05	0.000677386	coding	/
MSTRG.102838.1	0h	2h	OK	12.0021	4.06645	-1.56144	-2.87627	5e-05	0.000677386	coding	/
MSTRG.102893.2	0h	2h	OK	1.23874	3.04542	1.29776	2.598	5e-05	0.000677386	coding	/
MSTRG.102918.1	0h	2h	OK	19.0272	210.746	3.46937	9.82276	5e-05	0.000677386	noncoding	LncRNA
MSTRG.102920.1	0h	2h	OK	0.776205	1.95337	1.33146	1.74577	0.0066	0.0454909	coding	/
MSTRG.102923.2	0h	2h	OK	0.715506	2.40074	1.74644	1.86655	0.0049	0.0358252	coding	/
MSTRG.102924.1	0h	2h	OK	8.81242	20.5195	1.21939	2.22157	0.0001	0.00128341	coding	/
MSTRG.102938.1	0h	2h	OK	13.0832	5.04609	-1.37447	-3.19178	5e-05	0.000677386	coding	/
MSTRG.102945.1	0h	2h	OK	3.66001	0.587115	-2.64013	-4.14081	5e-05	0.000677386	coding	/
MSTRG.102948.1	0h	2h	OK	7.15692	3.1827	-1.16909	-1.85864	0.0015	0.0135722	noncoding	LncRNA
MSTRG.102949.1	0h	2h	OK	14.221	3.41983	-2.05603	-2.804	0.0001	0.00128341	coding	/
MSTRG.103014.2	0h	2h	OK	5.57178	2.71044	-1.03961	-1.78411	0.0027	0.021981	coding	/
MSTRG.103056.1	0h	2h	OK	21.2302	9.56704	-1.14997	-2.19622	0.0001	0.00128341	coding	/
MSTRG.103056.2	0h	2h	OK	13.2594	4.26268	-1.63718	-2.67348	5e-05	0.000677386	coding	/
MSTRG.103060.1	0h	2h	OK	0.236304	3.0177	3.67473	5.54983	5e-05	0.000677386	coding	/
MSTRG.103064.1	0h	2h	OK	1.124	2.78692	1.31003	2.76502	5e-05	0.000677386	coding	/
MSTRG.103069.1	0h	2h	OK	1.94853	8.99578	2.20686	3.3903	5e-05	0.000677386	noncoding	LncRNA
MSTRG.103069.2	0h	2h	OK	1.36874	6.83497	2.32009	3.7745	5e-05	0.000677386	noncoding	LncRNA
MSTRG.103070.1	0h	2h	OK	2.53905	15.2721	2.58854	5.8982	5e-05	0.000677386	coding	/
MSTRG.103104.1	0h	2h	OK	2.68692	5.75401	1.09861	2.11246	0.00045	0.00486448	coding	/
MSTRG.103106.1	0h	2h	OK	0.828657	5.02901	2.60143	2.85026	0.0002	0.00238948	noncoding	LncRNA
MSTRG.10311.1	0h	2h	OK	0.293675	2.40547	3.03403	2.31389	0.00575	0.0407573	coding	/
MSTRG.103112.3	0h	2h	OK	10.2236	4.98911	-1.03505	-2.62928	5e-05	0.000677386	coding	/
MSTRG.103114.1	0h	2h	OK	122.974	13.3455	-3.20392	-9.5045	5e-05	0.000677386	noncoding	LncRNA
MSTRG.103151.1	0h	2h	OK	2.90477	6.65627	1.19629	1.65794	0.0058	0.0410295	coding	/
MSTRG.10319.3	0h	2h	OK	0.750754	4.82552	2.68427	3.49289	5e-05	0.000677386	coding	/
MSTRG.103199.2	0h	2h	OK	5.25224	10.864	1.04855	2.73171	5e-05	0.000677386	coding	/
MSTRG.103326.2	0h	2h	OK	0.465318	3.16947	2.76795	2.96736	5e-05	0.000677386	coding	/
MSTRG.103356.2	0h	2h	OK	3.79322	22.717	2.58227	2.13173	0.00055	0.00579049	coding	/
MSTRG.103383.1	0h	2h	OK	4.37188	0.892505	-2.29232	-4.51664	5e-05	0.000677386	noncoding	LncRNA
MSTRG.103386.1	0h	2h	OK	45.6175	21.5116	-1.08447	-2.95297	5e-05	0.000677386	noncoding	LncRNA
MSTRG.103409.1	0h	2h	OK	3.63208	0.419763	-3.11315	-3.52353	5e-05	0.000677386	coding	/
MSTRG.103411.1	0h	2h	OK	3.90837	0.835266	-2.22626	-2.44417	0.00105	0.0100939	noncoding	LncRNA
MSTRG.103440.1	0h	2h	OK	1.37019	3.01621	1.13836	2.10789	0.00085	0.00843816	noncoding	LncRNA
MSTRG.103470.1	0h	2h	OK	1.72211	5.34447	1.63387	3.56254	5e-05	0.000677386	coding	/
MSTRG.103481.1	0h	2h	OK	0.723605	2.86016	1.98282	2.99736	5e-05	0.000677386	noncoding	LncRNA
MSTRG.103489.1	0h	2h	OK	23.7529	8.57377	-1.4701	-2.2381	0.00015	0.00185128	noncoding	LncRNA
MSTRG.103497.3	0h	2h	OK	4.68093	11.8535	1.34045	2.46779	0.0001	0.00128341	coding	/
MSTRG.103532.1	0h	2h	OK	5.2263	2.36863	-1.14174	-3.17482	5e-05	0.000677386	coding	/
MSTRG.103574.1	0h	2h	OK	71.4167	31.5092	-1.18049	-3.8588	5e-05	0.000677386	noncoding	LncRNA
MSTRG.103615.1	0h	2h	OK	4.10721	22.8733	2.47744	5.78347	5e-05	0.000677386	noncoding	LncRNA
MSTRG.103701.1	0h	2h	OK	6.59809	2.9585	-1.15718	-2.70392	5e-05	0.000677386	coding	/
MSTRG.103785.1	0h	2h	OK	1.19195	3.60583	1.59701	3.23718	5e-05	0.000677386	coding	/
MSTRG.10380.1	0h	2h	OK	4.31615	1.32918	-1.69921	-1.86766	0.00635	0.0441623	noncoding	LncRNA
MSTRG.103823.1	0h	2h	OK	1.31371	10.325	2.97443	5.68192	5e-05	0.000677386	coding	/
MSTRG.103857.1	0h	2h	OK	148.678	56.146	-1.40493	-3.28374	5e-05	0.000677386	noncoding	LncRNA
MSTRG.103861.1	0h	2h	OK	0.526531	2.37084	2.17081	3.10332	5e-05	0.000677386	coding	/
MSTRG.103871.1	0h	2h	OK	0.726384	72.8146	6.64735	10.1994	5e-05	0.000677386	coding	/
MSTRG.103880.1	0h	2h	OK	0.833984	3.43589	2.04259	2.59997	0.00025	0.00289824	noncoding	LncRNA
MSTRG.103942.1	0h	2h	OK	1.1993	3.22535	1.42727	1.93149	0.00545	0.0391332	coding	/
MSTRG.103950.1	0h	2h	OK	10.9075	27.8172	1.35065	3.31343	5e-05	0.000677386	coding	/
MSTRG.103957.1	0h	2h	OK	9.14276	3.62655	-1.33403	-2.42258	5e-05	0.000677386	coding	/
MSTRG.103970.1	0h	2h	OK	7.43839	16.2818	1.1302	3.32826	5e-05	0.000677386	coding	/
MSTRG.104038.1	0h	2h	OK	19.6447	8.73562	-1.16916	-1.88036	0.00095	0.00927935	coding	/
MSTRG.104074.1	0h	2h	OK	2.12366	6.74324	1.66689	3.54541	5e-05	0.000677386	noncoding	LncRNA
MSTRG.104167.3	0h	2h	OK	48.6854	14.1345	-1.78427	-5.44127	5e-05	0.000677386	coding	/
MSTRG.104171.1	0h	2h	OK	6.15519	23.3437	1.92316	4.21511	5e-05	0.000677386	noncoding	LncRNA
MSTRG.104204.1	0h	2h	OK	1.94379	32.6468	4.06999	9.92105	5e-05	0.000677386	noncoding	LncRNA
MSTRG.104213.1	0h	2h	OK	7.96604	50.6908	2.66979	5.09446	5e-05	0.000677386	noncoding	LncRNA
MSTRG.104297.1	0h	2h	OK	7.10895	15.4569	1.12054	2.79059	5e-05	0.000677386	coding	/
MSTRG.104311.1	0h	2h	OK	8.34212	1.01969	-3.03228	-4.67326	5e-05	0.000677386	noncoding	LncRNA
MSTRG.104339.2	0h	2h	OK	9.01688	29.9307	1.73093	2.65759	0.00015	0.00185128	coding	/
MSTRG.104340.2	0h	2h	OK	1.18735	2.42935	1.03282	2.1479	0.0001	0.00128341	coding	/
MSTRG.104341.1	0h	2h	OK	5.5817	2.55717	-1.12616	-2.78011	5e-05	0.000677386	noncoding	LncRNA
MSTRG.104350.1	0h	2h	OK	2.72929	7.9156	1.53617	1.8819	0.00395	0.0299984	noncoding	LncRNA
MSTRG.104380.2	0h	2h	OK	17.6093	5.88632	-1.5809	-2.27069	0.00035	0.00390194	coding	/
MSTRG.104388.1	0h	2h	OK	3.12618	7.4921	1.26097	2.84729	5e-05	0.000677386	coding	/
MSTRG.104421.1	0h	2h	OK	25.4199	12.06	-1.07572	-2.90598	5e-05	0.000677386	coding	/
MSTRG.104485.1	0h	2h	OK	10.7231	37.6387	1.81149	4.70532	5e-05	0.000677386	coding	/
MSTRG.104496.1	0h	2h	OK	0.160088	13.3602	6.38293	5.72128	0.0017	0.0150558	coding	/
MSTRG.104538.1	0h	2h	OK	0.409151	19.988	5.61036	6.78032	5e-05	0.000677386	coding	/
MSTRG.104563.2	0h	2h	OK	1.37286	5.64977	2.041	2.83921	5e-05	0.000677386	coding	/
MSTRG.104591.1	0h	2h	OK	4.39737	16.8206	1.93552	3.05295	5e-05	0.000677386	coding	/
MSTRG.104593.1	0h	2h	OK	10.9276	33.1299	1.60015	4.46394	5e-05	0.000677386	noncoding	LncRNA
MSTRG.104594.1	0h	2h	OK	0.58044	3.76878	2.69888	3.77813	5e-05	0.000677386	noncoding	LncRNA
MSTRG.104610.1	0h	2h	OK	2.20607	13.6855	2.6331	5.40045	5e-05	0.000677386	noncoding	LncRNA
MSTRG.104616.1	0h	2h	OK	12.3667	34.0064	1.45935	4.59441	5e-05	0.000677386	coding	/
MSTRG.104629.1	0h	2h	OK	3.28043	1.26169	-1.37853	-1.93184	0.00315	0.0249164	coding	/
MSTRG.104711.1	0h	2h	OK	0.26468	1.49423	2.49708	2.34589	0.00665	0.045757	coding	/
MSTRG.104723.1	0h	2h	OK	1.84895	0.607299	-1.60623	-2.22665	0.00075	0.00757795	noncoding	LncRNA
MSTRG.104832.1	0h	2h	OK	25.0445	11.5623	-1.11506	-3.18334	5e-05	0.000677386	coding	/
MSTRG.104847.1	0h	2h	OK	14.6516	5.24355	-1.48244	-3.13771	5e-05	0.000677386	coding	/
MSTRG.104851.1	0h	2h	OK	5.66885	34.0381	2.58602	5.00333	5e-05	0.000677386	coding	/
MSTRG.104889.1	0h	2h	OK	2.98591	1.20498	-1.30916	-2.18918	0.0007	0.00713988	noncoding	LncRNA
MSTRG.104897.1	0h	2h	OK	28.6724	336.809	3.55419	11.2264	5e-05	0.000677386	noncoding	LncRNA
MSTRG.104928.1	0h	2h	OK	11.3275	2.79114	-2.02091	-3.38362	5e-05	0.000677386	coding	/
MSTRG.105015.1	0h	2h	OK	4.83	0.51271	-3.23581	-3.78412	5e-05	0.000677386	noncoding	LncRNA
MSTRG.105046.1	0h	2h	OK	2.91325	7.76485	1.41433	3.23961	5e-05	0.000677386	coding	/
MSTRG.105070.1	0h	2h	OK	0.502613	23.1475	5.52526	4.89679	0.00035	0.00390194	coding	/
MSTRG.105073.1	0h	2h	OK	1.9595	15.0179	2.93813	3.34937	5e-05	0.000677386	coding	/
MSTRG.105077.1	0h	2h	OK	102.627	12.8868	-2.99344	-8.79777	5e-05	0.000677386	noncoding	LncRNA
MSTRG.105085.1	0h	2h	OK	10.389	3.40385	-1.60982	-2.99777	5e-05	0.000677386	coding	/
MSTRG.105087.1	0h	2h	OK	26.4041	9.00683	-1.55167	-3.5461	5e-05	0.000677386	coding	/
MSTRG.105134.1	0h	2h	OK	5.90771	34.4554	2.54406	5.06268	5e-05	0.000677386	noncoding	LncRNA
MSTRG.105145.1	0h	2h	OK	26.7181	1.5259	-4.13008	-7.38525	5e-05	0.000677386	coding	/
MSTRG.105187.1	0h	2h	OK	0.818457	2.87896	1.81457	1.91329	0.0047	0.0345856	noncoding	LncRNA
MSTRG.105192.1	0h	2h	OK	2.18567	5.04839	1.20775	2.43803	0.0001	0.00128341	noncoding	LncRNA
MSTRG.105194.1	0h	2h	OK	4.59035	11.3845	1.3104	2.16124	0.0014	0.012806	noncoding	LncRNA
MSTRG.105200.1	0h	2h	OK	3.52202	26.5741	2.91555	5.76911	5e-05	0.000677386	noncoding	LncRNA
MSTRG.105218.1	0h	2h	OK	4.22687	33.6238	2.99182	7.8144	5e-05	0.000677386	coding	/
MSTRG.105325.1	0h	2h	OK	1.42063	5.41648	1.93082	3.84329	5e-05	0.000677386	coding	/
MSTRG.10535.3	0h	2h	OK	4.35025	0.656631	-2.72794	-4.22616	5e-05	0.000677386	coding	/
MSTRG.105350.1	0h	2h	OK	0.40302	2.88885	2.84157	1.76372	0.0048	0.0351924	noncoding	LncRNA
MSTRG.105353.1	0h	2h	OK	1.89743	14.0137	2.88472	5.39294	5e-05	0.000677386	coding	/
MSTRG.105377.1	0h	2h	OK	7.25944	23.1196	1.67119	2.74823	5e-05	0.000677386	noncoding	LncRNA
MSTRG.105417.1	0h	2h	OK	38.3017	13.9945	-1.45255	-4.5766	5e-05	0.000677386	coding	/
MSTRG.105429.1	0h	2h	OK	1.02195	5.26885	2.36617	4.21254	5e-05	0.000677386	coding	/
MSTRG.105448.2	0h	2h	OK	5.10164	17.1877	1.75235	3.50759	5e-05	0.000677386	coding	/
MSTRG.105479.1	0h	2h	OK	31.3678	12.7043	-1.30397	-3.79984	5e-05	0.000677386	noncoding	LncRNA
MSTRG.105486.2	0h	2h	OK	3.96261	49.3451	3.63838	9.78251	5e-05	0.000677386	coding	/
MSTRG.105537.1	0h	2h	OK	2.43433	12.1144	2.31513	6.19951	5e-05	0.000677386	coding	/
MSTRG.105566.2	0h	2h	OK	160.738	525.871	1.71	5.16511	5e-05	0.000677386	coding	/
MSTRG.105632.1	0h	2h	OK	245.052	119.159	-1.0402	-3.402	5e-05	0.000677386	noncoding	LncRNA
MSTRG.105633.1	0h	2h	OK	0	1.12156	inf	#NAME?	5e-05	0.000677386	noncoding	LncRNA
MSTRG.105639.1	0h	2h	OK	1.03451	14.5382	3.81283	7.20888	5e-05	0.000677386	coding	/
MSTRG.105654.2	0h	2h	OK	0.568478	1.89804	1.73933	2.443	0.00195	0.0168315	coding	/
MSTRG.105726.1	0h	2h	OK	1.93854	4.68232	1.27226	1.70604	0.00315	0.0249164	coding	/
MSTRG.105726.3	0h	2h	OK	18.5899	39.4064	1.08391	2.23218	0.0005	0.00533502	coding	/
MSTRG.105772.1	0h	2h	OK	4.24086	22.8405	2.42916	6.08232	5e-05	0.000677386	coding	/
MSTRG.105780.4	0h	2h	OK	1.15381	3.58488	1.63552	2.03992	0.0024	0.0199986	coding	/
MSTRG.105796.1	0h	2h	OK	1.7422	3.84741	1.14298	1.85212	0.00355	0.0275055	coding	/
MSTRG.105834.1	0h	2h	OK	1.52078	4.17858	1.4582	2.04326	0.00375	0.0287773	coding	/
MSTRG.105864.1	0h	2h	OK	0.774706	2.01445	1.37866	2.55327	0.00015	0.00185128	coding	/
MSTRG.105890.1	0h	2h	OK	36.4677	14.2189	-1.35881	-4.42813	5e-05	0.000677386	coding	/
MSTRG.105940.1	0h	2h	OK	11.3927	50.9849	2.16196	5.32113	5e-05	0.000677386	coding	/
MSTRG.105941.1	0h	2h	OK	11.8176	42.6728	1.85237	2.20167	0.00025	0.00289824	noncoding	LncRNA
MSTRG.105942.1	0h	2h	OK	0	2.65422	inf	#NAME?	5e-05	0.000677386	noncoding	LncRNA
MSTRG.105955.2	0h	2h	OK	163.491	11.2249	-3.86444	-12.0354	5e-05	0.000677386	coding	/
MSTRG.106004.1	0h	2h	OK	4.98394	1.80863	-1.46239	-2.05216	0.00095	0.00927935	coding	/
MSTRG.106030.1	0h	2h	OK	1.44089	3.78582	1.39364	2.10451	0.00285	0.022966	coding	/
MSTRG.106033.2	0h	2h	OK	9.53327	24.3682	1.35395	3.53191	5e-05	0.000677386	coding	/
MSTRG.106035.1	0h	2h	OK	4.17296	9.01419	1.11113	2.39082	0.00015	0.00185128	coding	/
MSTRG.106126.1	0h	2h	OK	7.7879	2.23246	-1.8026	-3.13783	5e-05	0.000677386	coding	/
MSTRG.106136.1	0h	2h	OK	48.8053	188.501	1.94946	6.76718	5e-05	0.000677386	coding	/
MSTRG.106141.1	0h	2h	OK	0.815486	2.1013	1.36555	2.15886	0.00055	0.00579049	coding	/
MSTRG.106225.1	0h	2h	OK	1.01234	4.30515	2.08838	2.11392	0.00565	0.0402047	noncoding	LncRNA
MSTRG.106251.1	0h	2h	OK	8.41474	20.2613	1.26774	3.76601	5e-05	0.000677386	coding	/
MSTRG.106273.1	0h	2h	OK	0.841785	2.74405	1.70479	2.5964	0.0002	0.00238948	coding	/
MSTRG.106296.1	0h	2h	OK	0.61131	1.85862	1.60425	2.80901	5e-05	0.000677386	coding	/
MSTRG.106327.2	0h	2h	OK	6.14927	1.51335	-2.02267	-2.79137	0.0004	0.00438463	coding	/
MSTRG.106330.2	0h	2h	OK	24.0266	53.7322	1.16116	3.87689	5e-05	0.000677386	coding	/
MSTRG.106339.1	0h	2h	OK	4.30235	0.413173	-3.38031	-4.55045	5e-05	0.000677386	coding	/
MSTRG.106358.2	0h	2h	OK	2.23565	4.9118	1.13556	1.90208	0.0025	0.0207028	coding	/
MSTRG.106368.1	0h	2h	OK	9.02712	1.12011	-3.01062	-5.24834	5e-05	0.000677386	noncoding	LncRNA
MSTRG.106378.1	0h	2h	OK	2.74262	0.66892	-2.03565	-2.16218	0.00295	0.0236232	coding	/
MSTRG.106398.2	0h	2h	OK	4.08132	1.65912	-1.29861	-2.04596	0.0008	0.00801318	coding	/
MSTRG.106408.1	0h	2h	OK	106.106	35.7027	-1.57141	-3.83193	5e-05	0.000677386	noncoding	LncRNA
MSTRG.106411.1	0h	2h	OK	3.79493	1.50995	-1.32958	-1.86469	0.00315	0.0249164	noncoding	LncRNA
MSTRG.106422.1	0h	2h	OK	4.07977	62.144	3.92906	10.5162	5e-05	0.000677386	coding	/
MSTRG.106490.1	0h	2h	OK	0.520045	2.1357	2.038	2.27182	0.00025	0.00289824	coding	/
MSTRG.106500.1	0h	2h	OK	6.6094	17.523	1.40666	4.4614	5e-05	0.000677386	coding	/
MSTRG.106770.1	0h	2h	OK	6.64227	0.773365	-3.10246	-3.29586	5e-05	0.000677386	noncoding	LncRNA
MSTRG.106843.1	0h	2h	OK	1.05588	4.16381	1.97946	3.7517	5e-05	0.000677386	coding	/
MSTRG.106869.1	0h	2h	OK	47.8747	18.3828	-1.38091	-4.46627	5e-05	0.000677386	coding	/
[truncated: 3,690 more rows]

## Sheet: 24hDEG
test_id	sample_1	sample_2	status	value_1	value_2	log2(fold_change)	test_stat	p_value	q_value	significant	CPC_coding	LncRNA
AUR62000018-RA	0h	24h	OK	84.0182	24.1213	-1.80039	-3.64083	5e-05	0.000327342	yes	coding	/
AUR62000022-RA	0h	24h	OK	11.3524	22.9223	1.01376	1.52204	0.00795	0.0420764	yes	coding	/
AUR62000024-RA	0h	24h	OK	4.6797	1.31802	-1.82805	-1.9293	0.0057	0.0306333	yes	coding	/
AUR62000047-RA	0h	24h	OK	45.8817	14.3504	-1.67683	-2.60146	0.0002	0.00118357	yes	coding	/
AUR62000148-RA	0h	24h	OK	3.03167	13.6409	2.16975	2.88007	5e-05	0.000327342	yes	coding	/
AUR62000156-RA	0h	24h	OK	42.2163	11.665	-1.85561	-3.12868	5e-05	0.000327342	yes	coding	/
AUR62000176-RA	0h	24h	OK	16.0605	59.5842	1.89141	3.16966	5e-05	0.000327342	yes	coding	/
AUR62000192-RA	0h	24h	OK	4.49894	12.7583	1.50378	2.03594	0.002	0.0112918	yes	coding	/
AUR62000202-RA	0h	24h	OK	23.2838	3.36591	-2.79026	-2.94183	0.00035	0.00204936	yes	coding	/
AUR62000210-RA	0h	24h	OK	21.4689	6.47096	-1.7302	-2.05343	0.0038	0.0207464	yes	coding	/
AUR62000222-RA	0h	24h	OK	214.59	82.344	-1.38185	-2.95716	5e-05	0.000327342	yes	coding	/
AUR62000240-RA	0h	24h	OK	114.809	38.4691	-1.57747	-3.53002	5e-05	0.000327342	yes	coding	/
AUR62000253-RA	0h	24h	OK	7.80552	3.53875	-1.14126	-1.97345	0.00115	0.00657841	yes	coding	/
AUR62000269-RA	0h	24h	OK	69.7553	29.1855	-1.25705	-2.76391	5e-05	0.000327342	yes	coding	/
AUR62000274-RA	0h	24h	OK	27.7288	8.74444	-1.66495	-2.6894	5e-05	0.000327342	yes	coding	/
AUR62000288-RA	0h	24h	OK	307.618	102.809	-1.58117	-3.68979	5e-05	0.000327342	yes	coding	/
AUR62000301-RA	0h	24h	OK	128.077	37.1788	-1.78446	-2.29792	0.00075	0.00433205	yes	coding	/
AUR62000332-RA	0h	24h	OK	15.5999	2.11282	-2.88429	-2.67466	0.00065	0.00376631	yes	coding	/
AUR62000424-RA	0h	24h	OK	5.9294	12.5915	1.08649	1.54889	0.00785	0.0415703	yes	coding	/
AUR62000451-RA	0h	24h	OK	16.972	7.48923	-1.18027	-2.28661	0.0001	0.000607975	yes	coding	/
AUR62000485-RA	0h	24h	OK	3.17264	9.02248	1.50784	1.69131	0.0074	0.0393112	yes	coding	/
AUR62000514-RA	0h	24h	OK	15.6188	7.79706	-1.00228	-1.50429	0.0087	0.0458743	yes	coding	/
AUR62000600-RA	0h	24h	OK	14.4152	4.07651	-1.82218	-1.88337	0.0042	0.0228529	yes	coding	/
AUR62000628-RA	0h	24h	OK	12.1905	30.6544	1.33034	2.52702	5e-05	0.000327342	yes	coding	/
AUR62000631-RA	0h	24h	OK	4.7558	0	#NAME?	#NAME?	5e-05	0.000327342	yes	coding	/
AUR62000681-RA	0h	24h	OK	5.07199	16.5637	1.7074	1.93447	0.002	0.0112918	yes	coding	/
AUR62000683-RA	0h	24h	OK	4.81555	53.6095	3.47672	3.19163	5e-05	0.000327342	yes	coding	/
AUR62000727-RA	0h	24h	OK	160.467	32.449	-2.30603	-2.08641	0.0018	0.0101886	yes	noncoding	LncRNA
AUR62000743-RA	0h	24h	OK	3.27843	15.7455	2.26387	2.10204	0.00375	0.0204838	yes	coding	/
AUR62000756-RA	0h	24h	OK	31.3985	15.4234	-1.02557	-2.10008	0.00035	0.00204936	yes	coding	/
AUR62000805-RA	0h	24h	OK	3.32764	11.2086	1.75204	1.74758	0.00855	0.0451069	yes	coding	/
AUR62000816-RA	0h	24h	OK	16.0794	40.2012	1.32202	2.85411	5e-05	0.000327342	yes	coding	/
AUR62000829-RA	0h	24h	OK	5.15052	1.25471	-2.03737	-1.96805	0.0083	0.0438482	yes	coding	/
AUR62000903-RA	0h	24h	OK	251.206	68.2352	-1.88028	-4.06942	5e-05	0.000327342	yes	coding	/
AUR62000932-RA	0h	24h	OK	456.597	224.724	-1.02276	-2.36175	5e-05	0.000327342	yes	coding	/
AUR62000938-RA	0h	24h	OK	13.7437	4.41678	-1.6377	-2.14124	0.00175	0.00991359	yes	coding	/
AUR62000971-RA	0h	24h	OK	27.7833	62.8695	1.17814	2.57777	5e-05	0.000327342	yes	coding	/
AUR62001001-RA	0h	24h	OK	34.4373	170.544	2.3081	2.42128	0.0009	0.00517825	yes	coding	/
AUR62001003-RA	0h	24h	OK	38.6827	12.8647	-1.58827	-2.05515	0.00255	0.0142979	yes	coding	/
AUR62001023-RA	0h	24h	OK	21.0952	6.74937	-1.64409	-2.8394	5e-05	0.000327342	yes	coding	/
AUR62001058-RA	0h	24h	OK	29.8913	66.0569	1.14398	1.87106	0.0015	0.00852791	yes	coding	/
AUR62001124-RA	0h	24h	OK	0.91829	4.59909	2.32432	2.0028	0.00145	0.0082515	yes	coding	/
AUR62001135-RA	0h	24h	OK	2.48085	36.1076	3.86339	2.35639	0.0009	0.00517825	yes	coding	/
AUR62001143-RA	0h	24h	OK	11.8336	3.07178	-1.94574	-2.51647	0.00025	0.00147346	yes	coding	/
AUR62001155-RA	0h	24h	OK	6.46925	36.0734	2.47927	3.3986	5e-05	0.000327342	yes	coding	/
AUR62001159-RA	0h	24h	OK	27.5698	6.54065	-2.07558	-2.72504	0.0004	0.00233755	yes	coding	/
AUR62001198-RA	0h	24h	OK	356.182	137.321	-1.37506	-3.28864	5e-05	0.000327342	yes	coding	/
AUR62001205-RA	0h	24h	OK	33.2614	11.7548	-1.5006	-1.78125	0.00885	0.0466073	yes	coding	/
AUR62001210-RA	0h	24h	OK	45.8844	9.69838	-2.24219	-3.53846	5e-05	0.000327342	yes	coding	/
AUR62001219-RA	0h	24h	OK	14.7716	4.98344	-1.56761	-2.70504	5e-05	0.000327342	yes	coding	/
AUR62001230-RA	0h	24h	OK	52.5149	19.885	-1.40104	-2.79548	5e-05	0.000327342	yes	coding	/
AUR62001253-RA	0h	24h	OK	4.46227	13.4863	1.59564	2.37017	0.0005	0.00290939	yes	coding	/
AUR62001348-RA	0h	24h	OK	124.159	35.6693	-1.79944	-3.86219	5e-05	0.000327342	yes	coding	/
AUR62001357-RA	0h	24h	OK	22.0466	10.6015	-1.05628	-2.09749	0.0008	0.00461507	yes	coding	/
AUR62001362-RA	0h	24h	OK	50.9221	16.5151	-1.6245	-3.28156	5e-05	0.000327342	yes	coding	/
AUR62001375-RA	0h	24h	OK	62.4363	28.5061	-1.13111	-2.34351	0.0002	0.00118357	yes	coding	/
AUR62001399-RA	0h	24h	OK	74.5727	10.3861	-2.84399	-3.76139	5e-05	0.000327342	yes	noncoding	LncRNA
AUR62001403-RA	0h	24h	OK	8.7842	1.39788	-2.65167	-3.52995	5e-05	0.000327342	yes	coding	/
AUR62001412-RA	0h	24h	OK	43.508	14.1539	-1.62009	-2.62224	5e-05	0.000327342	yes	coding	/
AUR62001428-RA	0h	24h	OK	3.25974	13.4225	2.04182	3.26471	5e-05	0.000327342	yes	coding	/
AUR62001431-RA	0h	24h	OK	646.951	219.597	-1.5588	-3.44242	5e-05	0.000327342	yes	coding	/
AUR62001445-RA	0h	24h	OK	58.1133	14.0908	-2.04412	-2.39238	0.0042	0.0228529	yes	coding	/
AUR62001458-RA	0h	24h	OK	17.8989	8.61032	-1.05573	-1.7839	0.00335	0.0183629	yes	coding	/
AUR62001464-RA	0h	24h	OK	24.6021	66.3432	1.43117	3.03637	5e-05	0.000327342	yes	coding	/
AUR62001466-RA	0h	24h	OK	125.327	37.2653	-1.74979	-3.03277	5e-05	0.000327342	yes	coding	/
AUR62001474-RA	0h	24h	OK	3.64485	12.3811	1.76421	2.04382	0.0009	0.00517825	yes	coding	/
AUR62001482-RA	0h	24h	OK	62.665	29.5349	-1.08524	-2.25106	0.0002	0.00118357	yes	coding	/
AUR62001495-RA	0h	24h	OK	366.085	144.417	-1.34194	-3.03313	5e-05	0.000327342	yes	coding	/
AUR62001496-RA	0h	24h	OK	482.781	73.9008	-2.70771	-6.02913	5e-05	0.000327342	yes	coding	/
AUR62001593-RA	0h	24h	OK	8.27462	37.3858	2.17572	3.16249	5e-05	0.000327342	yes	coding	/
AUR62001595-RA	0h	24h	OK	46.9004	15.9438	-1.55661	-2.32424	0.0002	0.00118357	yes	coding	/
AUR62001613-RA	0h	24h	OK	1023.13	386.96	-1.40273	-3.26567	5e-05	0.000327342	yes	noncoding	LncRNA
AUR62001619-RA	0h	24h	OK	3.96195	13.3792	1.75571	1.98949	0.00215	0.0121157	yes	coding	/
AUR62001668-RA	0h	24h	OK	349.813	164.394	-1.08943	-1.73429	0.00725	0.0385499	yes	coding	/
AUR62001677-RA	0h	24h	OK	82.3918	34.179	-1.26939	-2.83813	5e-05	0.000327342	yes	coding	/
AUR62001701-RA	0h	24h	OK	1.88999	77.5907	5.35943	4.01099	0.0002	0.00118357	yes	coding	/
AUR62001707-RA	0h	24h	OK	81.2189	24.8297	-1.70975	-3.52348	5e-05	0.000327342	yes	coding	/
AUR62001712-RA	0h	24h	OK	119.45	31.5086	-1.9226	-2.48249	0.0005	0.00290939	yes	coding	/
AUR62001715-RA	0h	24h	OK	24.7137	10.0476	-1.29846	-1.62893	0.0083	0.0438482	yes	coding	/
AUR62001718-RA	0h	24h	OK	14.8687	5.03073	-1.56343	-1.67134	0.00515	0.0278137	yes	coding	/
AUR62001779-RA	0h	24h	OK	6.28438	15.1208	1.26669	2.06673	0.00115	0.00657841	yes	coding	/
AUR62001811-RA	0h	24h	OK	197.335	52.4906	-1.91052	-1.94469	0.0051	0.0275593	yes	coding	/
AUR62001814-RA	0h	24h	OK	106.779	46.9403	-1.18572	-2.41408	0.00035	0.00204936	yes	coding	/
AUR62001828-RA	0h	24h	OK	791.541	246.837	-1.68111	-3.8999	5e-05	0.000327342	yes	coding	/
AUR62001829-RA	0h	24h	OK	184.651	88.0044	-1.06915	-2.41185	0.0001	0.000607975	yes	coding	/
AUR62001840-RA	0h	24h	OK	661.916	158.308	-2.06392	-4.75486	5e-05	0.000327342	yes	coding	/
AUR62001910-RA	0h	24h	OK	7.44137	16.8352	1.17784	1.56638	0.00745	0.0395651	yes	coding	/
AUR62001977-RA	0h	24h	OK	12.9984	33.9879	1.38669	2.44635	5e-05	0.000327342	yes	coding	/
AUR62002008-RA	0h	24h	OK	41.7801	13.9653	-1.58097	-2.36083	0.0006	0.00348122	yes	coding	/
AUR62002021-RA	0h	24h	OK	115.56	13.4197	-3.10622	-3.35266	5e-05	0.000327342	yes	coding	/
AUR62002023-RA	0h	24h	OK	2.00018	10.4786	2.38925	2.19254	0.00355	0.0194249	yes	coding	/
AUR62002066-RA	0h	24h	OK	8.45171	0.966259	-3.12876	-2.81075	0.0003	0.00176267	yes	coding	/
AUR62002074-RA	0h	24h	OK	36.0758	17.9288	-1.00875	-1.76544	0.00435	0.0236443	yes	coding	/
AUR62002083-RA	0h	24h	OK	0.856264	5.57122	2.70187	1.62282	0.00945	0.0496117	yes	coding	/
AUR62002085-RA	0h	24h	OK	14.4039	0.597345	-4.59175	-3.31908	5e-05	0.000327342	yes	coding	/
AUR62002086-RA	0h	24h	OK	8.2929	3.23936	-1.35617	-1.77654	0.00395	0.0215376	yes	coding	/
AUR62002134-RA	0h	24h	OK	12.2823	30.9759	1.33457	2.12813	0.0007	0.00404934	yes	coding	/
AUR62002137-RA	0h	24h	OK	379.648	126.257	-1.5883	-3.65134	5e-05	0.000327342	yes	coding	/
AUR62002150-RA	0h	24h	OK	22.9652	51.1343	1.15484	2.54184	5e-05	0.000327342	yes	coding	/
AUR62002158-RA	0h	24h	OK	3.44488	0	#NAME?	#NAME?	0.00555	0.029858	yes	coding	/
AUR62002167-RA	0h	24h	OK	23.2578	3.97583	-2.54839	-3.8934	5e-05	0.000327342	yes	coding	/
AUR62002185-RA	0h	24h	OK	16.9905	3.15341	-2.42975	-2.00342	0.00645	0.0344997	yes	coding	/
AUR62002186-RA	0h	24h	OK	8.39722	1.13924	-2.88184	-1.96688	0.0034	0.0186319	yes	coding	/
AUR62002194-RA	0h	24h	OK	11.5147	32.5073	1.49728	2.82461	5e-05	0.000327342	yes	coding	/
AUR62002203-RA	0h	24h	OK	39.2352	17.1359	-1.19513	-2.58596	5e-05	0.000327342	yes	coding	/
AUR62002221-RA	0h	24h	OK	7.67374	2.63133	-1.54414	-2.14453	0.00075	0.00433205	yes	coding	/
AUR62002248-RA	0h	24h	OK	36.2423	17.4218	-1.05679	-1.92403	0.00115	0.00657841	yes	coding	/
AUR62002266-RA	0h	24h	OK	200.312	72.0536	-1.47511	-2.14508	0.00065	0.00376631	yes	coding	/
AUR62002313-RA	0h	24h	OK	393.368	128.208	-1.61739	-3.70288	5e-05	0.000327342	yes	coding	/
AUR62002379-RA	0h	24h	OK	58.8619	929.713	3.98138	8.05063	5e-05	0.000327342	yes	coding	/
AUR62002408-RA	0h	24h	OK	17.1195	5.98979	-1.51506	-2.72086	5e-05	0.000327342	yes	coding	/
AUR62002671-RA	0h	24h	OK	140.338	43.827	-1.67901	-3.71128	5e-05	0.000327342	yes	coding	/
AUR62002691-RA	0h	24h	OK	176.52	36.7228	-2.26508	-4.07808	5e-05	0.000327342	yes	coding	/
AUR62002760-RA	0h	24h	OK	420.73	105.479	-1.99594	-4.18366	5e-05	0.000327342	yes	coding	/
AUR62002766-RA	0h	24h	OK	3.2805	22.0234	2.74705	3.24044	5e-05	0.000327342	yes	coding	/
AUR62002834-RA	0h	24h	OK	5.42771	1.4715	-1.88306	-1.773	0.00825	0.0436041	yes	coding	/
AUR62002880-RA	0h	24h	OK	6.70944	1.90897	-1.8134	-2.50113	0.0001	0.000607975	yes	coding	/
AUR62002885-RA	0h	24h	OK	35.451	10.4982	-1.75568	-3.33896	5e-05	0.000327342	yes	coding	/
AUR62002967-RA	0h	24h	OK	6.19261	15.9132	1.3616	1.95036	0.00185	0.0104669	yes	coding	/
AUR62002973-RA	0h	24h	OK	2.41037	11.4586	2.2491	2.00947	0.00365	0.0199551	yes	coding	/
AUR62003019-RA	0h	24h	OK	11.8551	67.444	2.50819	4.47878	5e-05	0.000327342	yes	coding	/
AUR62003031-RA	0h	24h	OK	6.29172	21.9106	1.8001	2.57698	0.0003	0.00176267	yes	coding	/
AUR62003084-RA	0h	24h	OK	9.0169	22.0607	1.29077	1.99308	0.00095	0.00545853	yes	coding	/
AUR62003111-RA	0h	24h	OK	33.539	9.64215	-1.79841	-3.67196	5e-05	0.000327342	yes	coding	/
AUR62003117-RA	0h	24h	OK	1.81396	9.51511	2.39108	2.89647	5e-05	0.000327342	yes	coding	/
AUR62003186-RA	0h	24h	OK	26.3304	7.81897	-1.75168	-2.70983	5e-05	0.000327342	yes	coding	/
AUR62003202-RA	0h	24h	OK	1.4658	0	#NAME?	#NAME?	5e-05	0.000327342	yes	coding	/
AUR62003216-RA	0h	24h	OK	9.67711	1.93415	-2.32288	-2.01438	0.00345	0.0188988	yes	coding	/
AUR62003228-RA	0h	24h	OK	3.20821	0	#NAME?	#NAME?	0.0002	0.00118357	yes	coding	/
AUR62003256-RA	0h	24h	OK	71.3856	179.242	1.3282	2.85962	5e-05	0.000327342	yes	coding	/
AUR62003361-RA	0h	24h	OK	24.6684	6.05561	-2.02632	-3.67148	5e-05	0.000327342	yes	coding	/
AUR62003368-RA	0h	24h	OK	31.2833	81.2254	1.37654	2.9269	5e-05	0.000327342	yes	coding	/
AUR62003392-RA	0h	24h	OK	35.9002	16.8931	-1.08756	-2.3054	0.0001	0.000607975	yes	coding	/
AUR62003403-RA	0h	24h	OK	102.319	45.7745	-1.16046	-2.6988	5e-05	0.000327342	yes	coding	/
AUR62003427-RA	0h	24h	OK	21.7001	4.03666	-2.42647	-3.77221	5e-05	0.000327342	yes	coding	/
AUR62003443-RA	0h	24h	OK	179.758	20.9498	-3.10105	-5.0092	0.0072	0.0383131	yes	coding	/
AUR62003460-RA	0h	24h	OK	2.48221	0.474027	-2.38859	-1.8458	0.00825	0.0436041	yes	coding	/
AUR62003515-RA	0h	24h	OK	79.5687	34.1095	-1.22203	-2.2555	0.0005	0.00290939	yes	coding	/
AUR62003542-RA	0h	24h	OK	0.774442	5.80089	2.90504	2.01348	0.00925	0.048606	yes	coding	/
AUR62003563-RA	0h	24h	OK	42.7545	13.0258	-1.71471	-2.33964	0.00095	0.00545853	yes	coding	/
AUR62003587-RA	0h	24h	OK	14.2819	5.23531	-1.44784	-1.78403	0.00535	0.0288484	yes	coding	/
AUR62003599-RA	0h	24h	OK	3.65801	0.960685	-1.92893	-1.69451	0.00715	0.0380583	yes	coding	/
AUR62003600-RA	0h	24h	OK	20.6521	0	#NAME?	#NAME?	5e-05	0.000327342	yes	coding	/
AUR62003639-RA	0h	24h	OK	939.979	271.646	-1.7909	-3.74008	5e-05	0.000327342	yes	coding	/
AUR62003653-RA	0h	24h	OK	42.6359	123.223	1.53113	2.89424	5e-05	0.000327342	yes	coding	/
AUR62003693-RA	0h	24h	OK	4.76008	18.3258	1.94482	2.53043	0.00015	0.000893574	yes	coding	/
AUR62003695-RA	0h	24h	OK	57.8273	126.454	1.12879	2.58429	5e-05	0.000327342	yes	coding	/
AUR62003699-RA	0h	24h	OK	55.8317	27.3488	-1.02961	-2.11481	0.0004	0.00233755	yes	coding	/
AUR62003712-RA	0h	24h	OK	4.03321	23.3828	2.53545	2.23788	0.0011	0.00630043	yes	coding	/
AUR62003716-RA	0h	24h	OK	86.152	36.7743	-1.22819	-2.75149	5e-05	0.000327342	yes	coding	/
AUR62003723-RA	0h	24h	OK	5.4247	13.6817	1.33463	2.03747	0.001	0.00573806	yes	coding	/
AUR62003757-RA	0h	24h	OK	12.756	4.36739	-1.54633	-2.26335	0.00035	0.00204936	yes	coding	/
AUR62003769-RA	0h	24h	OK	182.591	33.7236	-2.43678	-3.6427	5e-05	0.000327342	yes	coding	/
AUR62003780-RA	0h	24h	OK	98.2138	28.7311	-1.77331	-3.49562	5e-05	0.000327342	yes	coding	/
AUR62003794-RA	0h	24h	OK	59.0752	14.7525	-2.0016	-3.22494	5e-05	0.000327342	yes	coding	/
AUR62003804-RA	0h	24h	OK	6.94169	26	1.90516	2.34022	0.0001	0.000607975	yes	coding	/
AUR62003810-RA	0h	24h	OK	11.9827	26.5799	1.14939	1.78292	0.00415	0.0225938	yes	coding	/
AUR62003813-RA	0h	24h	OK	7.15272	15.7472	1.13853	1.74087	0.00435	0.0236443	yes	coding	/
AUR62003814-RA	0h	24h	OK	284.965	21.1365	-3.75298	-7.39131	5e-05	0.000327342	yes	coding	/
AUR62003830-RA	0h	24h	OK	14.6508	31.8767	1.12152	2.03477	0.00075	0.00433205	yes	coding	/
AUR62003834-RA	0h	24h	OK	14.5431	0.986695	-3.88159	-2.85211	0.0026	0.0145707	yes	coding	/
AUR62003838-RA	0h	24h	OK	83.6261	26.3128	-1.66819	-3.80497	5e-05	0.000327342	yes	coding	/
AUR62003867-RA	0h	24h	OK	25.8434	9.32542	-1.47056	-1.88607	0.00425	0.0231171	yes	coding	/
AUR62003880-RA	0h	24h	OK	12.3335	46.2843	1.90794	2.73269	0.00025	0.00147346	yes	coding	/
AUR62003891-RA	0h	24h	OK	122.673	56.673	-1.11408	-2.63743	5e-05	0.000327342	yes	coding	/
AUR62003892-RA	0h	24h	OK	19.4645	8.4031	-1.21185	-2.25201	0.0003	0.00176267	yes	coding	/
AUR62003919-RA	0h	24h	OK	9.18028	1.89144	-2.27905	-2.13177	0.00385	0.0210115	yes	coding	/
AUR62003931-RA	0h	24h	OK	9.66241	2.78093	-1.79682	-2.27384	0.00085	0.00489598	yes	coding	/
AUR62003938-RA	0h	24h	OK	6.10625	13.0383	1.0944	1.56879	0.00715	0.0380583	yes	coding	/
AUR62003945-RA	0h	24h	OK	15.7169	79.2033	2.33324	5.13188	5e-05	0.000327342	yes	coding	/
AUR62003949-RA	0h	24h	OK	2.8506	36.5404	3.68015	4.97022	5e-05	0.000327342	yes	coding	/
AUR62003953-RA	0h	24h	OK	100.348	4.67309	-4.4245	-5.81751	5e-05	0.000327342	yes	coding	/
AUR62003960-RA	0h	24h	OK	205.657	57.5143	-1.83825	-4.02954	5e-05	0.000327342	yes	coding	/
AUR62003967-RA	0h	24h	OK	22.195	1.23963	-4.16225	-3.98885	0.00025	0.00147346	yes	coding	/
AUR62003974-RA	0h	24h	OK	534.526	210.18	-1.34664	-3.09231	5e-05	0.000327342	yes	noncoding	LncRNA
AUR62003996-RA	0h	24h	OK	4.1517	20.7717	2.32285	2.58946	0.00015	0.000893574	yes	coding	/
AUR62004001-RA	0h	24h	OK	143.778	44.8483	-1.68072	-3.86329	5e-05	0.000327342	yes	coding	/
AUR62004009-RA	0h	24h	OK	8.78973	3.56284	-1.30279	-1.67313	0.00875	0.0461183	yes	coding	/
AUR62004021-RA	0h	24h	OK	5.15929	0	#NAME?	#NAME?	5e-05	0.000327342	yes	coding	/
AUR62004029-RA	0h	24h	OK	16.658	52.2404	1.64895	1.92064	0.00375	0.0204838	yes	noncoding	LncRNA
AUR62004043-RA	0h	24h	OK	6.99683	33.9848	2.28012	3.46714	5e-05	0.000327342	yes	coding	/
AUR62004047-RA	0h	24h	OK	145.909	59.8933	-1.2846	-2.98443	5e-05	0.000327342	yes	coding	/
AUR62004067-RA	0h	24h	OK	23.4946	3.72586	-2.65668	-3.91113	5e-05	0.000327342	yes	coding	/
AUR62004071-RA	0h	24h	OK	69.2762	22.0944	-1.64868	-3.55672	5e-05	0.000327342	yes	coding	/
AUR62004079-RA	0h	24h	OK	89.0669	31.1959	-1.51353	-3.4013	5e-05	0.000327342	yes	coding	/
AUR62004080-RA	0h	24h	OK	38.8961	14.0484	-1.46922	-2.39411	0.0001	0.000607975	yes	coding	/
AUR62004101-RA	0h	24h	OK	4.70258	0.583194	-3.01141	-2.14601	0.00455	0.0246898	yes	coding	/
AUR62004106-RA	0h	24h	OK	63.5392	12.2033	-2.38038	-3.74828	5e-05	0.000327342	yes	coding	/
AUR62004107-RA	0h	24h	OK	305.108	79.6164	-1.93818	-4.59913	5e-05	0.000327342	yes	coding	/
AUR62004157-RA	0h	24h	OK	26.4781	4.8748	-2.44138	-3.00191	5e-05	0.000327342	yes	coding	/
AUR62004181-RA	0h	24h	OK	71.1154	27.8365	-1.35318	-2.11396	0.0044	0.0239048	yes	coding	/
AUR62004190-RA	0h	24h	OK	14.5016	29.0891	1.00426	1.73412	0.00295	0.0164629	yes	coding	/
AUR62004194-RA	0h	24h	OK	79.4308	19.1763	-2.05038	-1.94612	0.00695	0.0370439	yes	coding	/
AUR62004205-RA	0h	24h	OK	9.81491	22.2301	1.17947	1.99059	0.00045	0.00262489	yes	coding	/
AUR62004240-RA	0h	24h	OK	9.09366	2.36142	-1.9452	-2.31274	0.0011	0.00630043	yes	coding	/
AUR62004266-RA	0h	24h	OK	1.84011	9.32627	2.34151	2.07256	0.0032	0.0178002	yes	coding	/
AUR62004284-RA	0h	24h	OK	16.3692	3.82291	-2.09824	-3.832	5e-05	0.000327342	yes	coding	/
AUR62004288-RA	0h	24h	OK	3.70112	52.6167	3.82949	2.79632	0.00225	0.0126629	yes	coding	/
AUR62004301-RA	0h	24h	OK	21.3166	6.60482	-1.69039	-2.3012	0.00145	0.0082515	yes	coding	/
AUR62004353-RA	0h	24h	OK	21.0075	5.87022	-1.83942	-2.62618	0.0001	0.000607975	yes	coding	/
AUR62004380-RA	0h	24h	OK	23.8867	55.4054	1.21382	1.94749	0.0006	0.00348122	yes	coding	/
AUR62004399-RA	0h	24h	OK	55.9587	14.6881	-1.92971	-3.71698	5e-05	0.000327342	yes	coding	/
AUR62004408-RA	0h	24h	OK	82.671	690.841	3.0629	6.56368	5e-05	0.000327342	yes	coding	/
AUR62004437-RA	0h	24h	OK	93.3073	253.092	1.4396	3.3391	5e-05	0.000327342	yes	coding	/
AUR62004485-RA	0h	24h	OK	35.0759	123.557	1.81663	4.1267	5e-05	0.000327342	yes	coding	/
AUR62004493-RA	0h	24h	OK	35.3933	17.6616	-1.00286	-2.25106	0.00015	0.000893574	yes	coding	/
AUR62004539-RA	0h	24h	OK	14.1757	2.47011	-2.52077	-2.53547	0.00215	0.0121157	yes	coding	/
AUR62004552-RA	0h	24h	OK	5.30791	0	#NAME?	#NAME?	5e-05	0.000327342	yes	coding	/
AUR62004568-RA	0h	24h	OK	15.2878	61.7216	2.01339	4.02618	5e-05	0.000327342	yes	coding	/
AUR62004598-RA	0h	24h	OK	14.1062	49.3916	1.80794	4.04765	5e-05	0.000327342	yes	coding	/
AUR62004620-RA	0h	24h	OK	13.3804	4.63589	-1.5292	-1.96253	0.00255	0.0142979	yes	coding	/
AUR62004633-RA	0h	24h	OK	55.2223	26.5922	-1.05425	-1.72321	0.00515	0.0278137	yes	coding	/
AUR62004637-RA	0h	24h	OK	20.8385	9.92823	-1.06965	-1.68367	0.00535	0.0288484	yes	coding	/
AUR62004638-RA	0h	24h	OK	26.428	9.33197	-1.50181	-2.47041	0.00055	0.00319537	yes	coding	/
AUR62004651-RA	0h	24h	OK	15.4181	4.10534	-1.90905	-3.3972	5e-05	0.000327342	yes	coding	/
AUR62004667-RA	0h	24h	OK	122.889	279.17	1.18379	2.77129	5e-05	0.000327342	yes	coding	/
AUR62004854-RA	0h	24h	OK	11.77	4.39596	-1.42087	-2.10636	0.00105	0.00602046	yes	coding	/
AUR62004958-RA	0h	24h	OK	99.2513	930.703	3.22916	5.11252	5e-05	0.000327342	yes	coding	/
AUR62005000-RA	0h	24h	OK	13.2466	29.5027	1.15523	1.6668	0.0054	0.0290821	yes	coding	/
AUR62005030-RA	0h	24h	OK	22.3958	9.92834	-1.1736	-1.92212	0.0058	0.0311469	yes	coding	/
AUR62005038-RA	0h	24h	OK	323.392	137.752	-1.23121	-2.9198	5e-05	0.000327342	yes	noncoding	LncRNA
AUR62005067-RA	0h	24h	OK	2.79555	0	#NAME?	#NAME?	5e-05	0.000327342	yes	coding	/
AUR62005072-RA	0h	24h	OK	187.459	15.07	-3.63683	-4.33864	0.0051	0.0275593	yes	coding	/
AUR62005132-RA	0h	24h	OK	18.3615	5.41394	-1.76194	-2.48435	0.00035	0.00204936	yes	coding	/
AUR62005139-RA	0h	24h	OK	21.389	8.85093	-1.27297	-2.383	0.0001	0.000607975	yes	coding	/
AUR62005154-RA	0h	24h	OK	18.2259	59.8609	1.71562	3.85905	5e-05	0.000327342	yes	coding	/
AUR62005161-RA	0h	24h	OK	18.6684	4.3078	-2.11558	-2.34942	0.00185	0.0104669	yes	coding	/
AUR62005218-RA	0h	24h	OK	60.6173	22.0069	-1.46177	-2.04523	0.00075	0.00433205	yes	noncoding	LncRNA
AUR62005225-RA	0h	24h	OK	256.442	105.663	-1.27916	-2.9617	5e-05	0.000327342	yes	coding	/
AUR62005258-RA	0h	24h	OK	11.1578	50.7182	2.18446	2.56987	0.00035	0.00204936	yes	coding	/
AUR62005312-RA	0h	24h	OK	53.9136	19.7415	-1.44942	-2.51298	0.0001	0.000607975	yes	coding	/
AUR62005316-RA	0h	24h	OK	1.57945	16.8643	3.41648	2.72028	0.0004	0.00233755	yes	coding	/
AUR62005370-RA	0h	24h	OK	25.8977	12.9389	-1.00111	-1.87163	0.0021	0.011841	yes	coding	/
AUR62005464-RA	0h	24h	OK	0.749262	4.32063	2.5277	2.32835	0.0015	0.00852791	yes	coding	/
AUR62005467-RA	0h	24h	OK	12.1403	63.1812	2.37969	2.48997	0.00175	0.00991359	yes	noncoding	LncRNA
AUR62005515-RA	0h	24h	OK	64.4094	213.933	1.73181	2.41353	0.0002	0.00118357	yes	coding	/
AUR62005527-RA	0h	24h	OK	33.4014	3.13959	-3.41126	-3.74306	5e-05	0.000327342	yes	coding	/
AUR62005539-RA	0h	24h	OK	37.8279	16.4832	-1.19845	-2.34557	5e-05	0.000327342	yes	coding	/
AUR62005597-RA	0h	24h	OK	5.91045	19.3806	1.71327	1.78371	0.0089	0.0468553	yes	coding	/
AUR62005607-RA	0h	24h	OK	9.00858	1.01459	-3.1504	-2.88215	5e-05	0.000327342	yes	coding	/
AUR62005609-RA	0h	24h	OK	10.5311	32.8648	1.64189	2.71691	5e-05	0.000327342	yes	coding	/
AUR62005625-RA	0h	24h	OK	32.5414	14.4223	-1.17397	-1.80212	0.00235	0.01321	yes	coding	/
AUR62005654-RA	0h	24h	OK	20.7514	9.12262	-1.18569	-2.17162	0.00035	0.00204936	yes	coding	/
AUR62005663-RA	0h	24h	OK	12.4763	25.7245	1.04395	1.67065	0.0055	0.0295989	yes	coding	/
AUR62005694-RA	0h	24h	OK	4.40174	0	#NAME?	#NAME?	0.00025	0.00147346	yes	noncoding	LncRNA
AUR62005695-RA	0h	24h	OK	9.21801	43.0061	2.22201	3.49139	5e-05	0.000327342	yes	coding	/
AUR62005728-RA	0h	24h	OK	216.942	74.7027	-1.53808	-3.61195	5e-05	0.000327342	yes	coding	/
AUR62005740-RA	0h	24h	OK	17.428	4.47099	-1.96274	-2.79635	0.0001	0.000607975	yes	coding	/
AUR62005753-RA	0h	24h	OK	189.868	71.5389	-1.4082	-3.0406	5e-05	0.000327342	yes	coding	/
AUR62005767-RA	0h	24h	OK	2.49535	0	#NAME?	#NAME?	5e-05	0.000327342	yes	coding	/
AUR62005768-RA	0h	24h	OK	18.5951	5.93027	-1.64875	-2.19429	0.00545	0.0293396	yes	coding	/
AUR62005770-RA	0h	24h	OK	36.7004	14.8319	-1.30709	-1.89764	0.00855	0.0451069	yes	coding	/
AUR62005786-RA	0h	24h	OK	591.375	251.047	-1.23611	-2.97833	5e-05	0.000327342	yes	coding	/
AUR62005790-RA	0h	24h	OK	17.4508	7.4468	-1.2286	-1.73222	0.0049	0.026523	yes	coding	/
AUR62005795-RA	0h	24h	OK	58.5227	7.87863	-2.89298	-4.15613	5e-05	0.000327342	yes	coding	/
AUR62005801-RA	0h	24h	OK	77.3482	10.1267	-2.93321	-4.52521	5e-05	0.000327342	yes	coding	/
AUR62005802-RA	0h	24h	OK	55.2596	4.81771	-3.51981	-3.77133	0.0001	0.000607975	yes	coding	/
AUR62005818-RA	0h	24h	OK	79.2216	13.7358	-2.52795	-2.76143	0.0001	0.000607975	yes	coding	/
AUR62005828-RA	0h	24h	OK	29.5566	6.16693	-2.26086	-2.41894	0.00715	0.0380583	yes	coding	/
AUR62005841-RA	0h	24h	OK	4.63853	14.9242	1.68591	2.22012	0.0015	0.00852791	yes	coding	/
AUR62005848-RA	0h	24h	OK	16.8519	7.69828	-1.1303	-1.95446	0.00155	0.00880597	yes	coding	/
AUR62005878-RA	0h	24h	OK	6.62198	39.0009	2.55817	3.04078	5e-05	0.000327342	yes	coding	/
AUR62005883-RA	0h	24h	OK	152.741	25.989	-2.55512	-3.71906	0.00325	0.0180702	yes	coding	/
AUR62005927-RA	0h	24h	OK	89.6622	32.2186	-1.47661	-3.13243	5e-05	0.000327342	yes	coding	/
AUR62005947-RA	0h	24h	OK	27.7499	9.36612	-1.56696	-2.68152	5e-05	0.000327342	yes	coding	/
AUR62005958-RA	0h	24h	OK	1024.12	353.543	-1.53443	-3.48575	5e-05	0.000327342	yes	coding	/
AUR62005959-RA	0h	24h	OK	9.76581	3.3274	-1.55334	-2.10903	0.0009	0.00517825	yes	coding	/
AUR62005995-RA	0h	24h	OK	1.63861	8.73662	2.4146	2.20478	0.00665	0.0355094	yes	coding	/
AUR62005998-RA	0h	24h	OK	2.06515	0	#NAME?	#NAME?	5e-05	0.000327342	yes	coding	/
AUR62006008-RA	0h	24h	OK	5.88598	28.5977	2.28054	2.41784	0.0027	0.0151148	yes	coding	/
AUR62006030-RA	0h	24h	OK	1.53511	65.1976	5.4084	3.07374	0.00795	0.0420764	yes	coding	/
AUR62006069-RA	0h	24h	OK	20.8154	6.66814	-1.6423	-3.09563	5e-05	0.000327342	yes	coding	/
AUR62006104-RA	0h	24h	OK	3.51376	15.78	2.16701	3.42393	5e-05	0.000327342	yes	coding	/
AUR62006114-RA	0h	24h	OK	27.9298	13.8141	-1.01566	-1.68709	0.006	0.0321845	yes	coding	/
AUR62006130-RA	0h	24h	OK	0.721846	22.1574	4.93995	3.30551	0.0004	0.00233755	yes	coding	/
AUR62006136-RA	0h	24h	OK	2.5289	7.82979	1.63046	1.9225	0.00425	0.0231171	yes	coding	/
AUR62006212-RA	0h	24h	OK	629.732	237.326	-1.40787	-3.31244	5e-05	0.000327342	yes	coding	/
AUR62006229-RA	0h	24h	OK	41.4404	10.1741	-2.02613	-3.04458	5e-05	0.000327342	yes	coding	/
AUR62006233-RA	0h	24h	OK	10.0926	34.2714	1.7637	2.86296	5e-05	0.000327342	yes	coding	/
AUR62006239-RA	0h	24h	OK	673.12	233.126	-1.52976	-3.66982	5e-05	0.000327342	yes	coding	/
AUR62006250-RA	0h	24h	OK	56.7348	17.5666	-1.69139	-2.84531	5e-05	0.000327342	yes	coding	/
AUR62006253-RA	0h	24h	OK	23.9389	4.74605	-2.33456	-2.26372	0.0022	0.0123893	yes	coding	/
AUR62006259-RA	0h	24h	OK	14.4154	0	#NAME?	#NAME?	5e-05	0.000327342	yes	coding	/
AUR62006261-RA	0h	24h	OK	452.021	105.709	-2.09629	-4.51462	5e-05	0.000327342	yes	coding	/
AUR62006270-RA	0h	24h	OK	37.0278	15.2479	-1.28	-1.98832	0.00525	0.0283319	yes	coding	/
AUR62006280-RA	0h	24h	OK	109.676	14.6884	-2.9005	-3.30136	5e-05	0.000327342	yes	coding	/
AUR62006306-RA	0h	24h	OK	545.889	226.165	-1.27123	-2.95853	5e-05	0.000327342	yes	coding	/
AUR62006331-RA	0h	24h	OK	5.75525	148.871	4.69304	8.19875	5e-05	0.000327342	yes	coding	/
AUR62006334-RA	0h	24h	OK	1.06571	0	#NAME?	#NAME?	5e-05	0.000327342	yes	coding	/
AUR62006375-RA	0h	24h	OK	251.269	90.7688	-1.46897	-3.24146	5e-05	0.000327342	yes	coding	/
AUR62006390-RA	0h	24h	OK	696.445	160.39	-2.11843	-4.97045	5e-05	0.000327342	yes	coding	/
AUR62006427-RA	0h	24h	OK	5.87321	13.7668	1.22897	1.74083	0.00295	0.0164629	yes	coding	/
AUR62006439-RA	0h	24h	OK	16.8469	4.74557	-1.82783	-3.02509	5e-05	0.000327342	yes	coding	/
AUR62006442-RA	0h	24h	OK	50.2721	3.75668	-3.74223	-3.24669	0.00085	0.00489598	yes	coding	/
AUR62006493-RA	0h	24h	OK	470.277	217.16	-1.11476	-2.31619	0.00015	0.000893574	yes	coding	/
AUR62006556-RA	0h	24h	OK	26.8835	4.95049	-2.44108	-2.67801	0.0031	0.0172594	yes	coding	/
AUR62006565-RA	0h	24h	OK	3.46075	23.8082	2.7823	3.08623	5e-05	0.000327342	yes	coding	/
AUR62006581-RA	0h	24h	OK	20.996	224.911	3.42117	3.75573	5e-05	0.000327342	yes	coding	/
AUR62006636-RA	0h	24h	OK	250.459	73.9308	-1.76033	-3.67324	5e-05	0.000327342	yes	coding	/
AUR62006642-RA	0h	24h	OK	2.85839	11.3377	1.98786	1.66154	0.00775	0.0410637	yes	coding	/
AUR62006749-RA	0h	24h	OK	9.04223	46.306	2.35645	2.83424	5e-05	0.000327342	yes	coding	/
AUR62006764-RA	0h	24h	OK	40.2207	14.8332	-1.43911	-2.1374	0.00105	0.00602046	yes	noncoding	LncRNA
AUR62006777-RA	0h	24h	OK	2.40429	43.8224	4.18799	3.93049	5e-05	0.000327342	yes	coding	/
AUR62006842-RA	0h	24h	OK	28.8068	7.32373	-1.97576	-2.02664	0.00335	0.0183629	yes	coding	/
AUR62006861-RA	0h	24h	OK	42.0345	14.9362	-1.49276	-2.23897	0.00085	0.00489598	yes	coding	/
AUR62006866-RA	0h	24h	OK	38.9817	16.366	-1.25209	-1.93202	0.002	0.0112918	yes	coding	/
AUR62006877-RA	0h	24h	OK	195.561	25.3943	-2.94504	-6.61035	5e-05	0.000327342	yes	coding	/
AUR62006885-RA	0h	24h	OK	16.2277	106.026	2.70789	4.84973	5e-05	0.000327342	yes	coding	/
AUR62006888-RA	0h	24h	OK	6.28378	13.0426	1.05352	1.65952	0.0054	0.0290821	yes	coding	/
AUR62006999-RA	0h	24h	OK	4.09827	12.4585	1.60405	2.63886	0.0001	0.000607975	yes	coding	/
AUR62007017-RA	0h	24h	OK	98.9454	9.58311	-3.36807	-5.68566	5e-05	0.000327342	yes	coding	/
AUR62007054-RA	0h	24h	OK	0.218721	21.7707	6.63715	3.81908	0.00415	0.0225938	yes	coding	/
AUR62007055-RA	0h	24h	OK	4.25528	0.420689	-3.33843	-2.07901	0.0046	0.0249485	yes	coding	/
AUR62007096-RA	0h	24h	OK	2.50612	11.5045	2.19867	1.99179	0.005	0.027048	yes	coding	/
AUR62007099-RA	0h	24h	OK	1.02764	0	#NAME?	#NAME?	0.0001	0.000607975	yes	coding	/
AUR62007123-RA	0h	24h	OK	26.5093	11.7067	-1.17916	-2.08976	0.0005	0.00290939	yes	coding	/
AUR62007131-RA	0h	24h	OK	9.33663	0.544283	-4.10047	-2.91234	0.0007	0.00404934	yes	coding	/
AUR62007163-RA	0h	24h	OK	1.29458	21.4013	4.04714	2.97256	0.0015	0.00852791	yes	coding	/
AUR62007168-RA	0h	24h	OK	2.18701	0	#NAME?	#NAME?	5e-05	0.000327342	yes	coding	/
AUR62007208-RA	0h	24h	OK	305.435	118.954	-1.36046	-3.23295	5e-05	0.000327342	yes	coding	/
AUR62007235-RA	0h	24h	OK	14.843	5.21416	-1.50927	-2.63103	0.0001	0.000607975	yes	coding	/
AUR62007260-RA	0h	24h	OK	51.0608	11.2908	-2.17707	-2.29383	0.0026	0.0145707	yes	coding	/
AUR62007270-RA	0h	24h	OK	16.0715	3.81018	-2.07657	-2.52975	0.0003	0.00176267	yes	coding	/
AUR62007289-RA	0h	24h	OK	66.325	10.9008	-2.60512	-1.79626	0.00775	0.0410637	yes	coding	/
AUR62007297-RA	0h	24h	OK	13.9909	6.79466	-1.04202	-1.61773	0.00765	0.0405751	yes	coding	/
AUR62007379-RA	0h	24h	OK	30.7605	6.19878	-2.31102	-2.39333	0.0028	0.0156529	yes	coding	/
AUR62007385-RA	0h	24h	OK	7.2541	1.13096	-2.68125	-1.92077	0.00775	0.0410637	yes	coding	/
AUR62007415-RA	0h	24h	OK	741.78	302.343	-1.2948	-2.94233	5e-05	0.000327342	yes	coding	/
AUR62007501-RA	0h	24h	OK	33.9252	117.554	1.7929	3.51464	5e-05	0.000327342	yes	coding	/
AUR62007509-RA	0h	24h	OK	14.2616	36.9255	1.37249	2.27738	0.0002	0.00118357	yes	coding	/
AUR62007537-RA	0h	24h	OK	2.08816	30.8073	3.88296	2.42266	0.00195	0.0110149	yes	noncoding	LncRNA
AUR62007558-RA	0h	24h	OK	10.5049	51.7905	2.30162	4.19404	5e-05	0.000327342	yes	coding	/
AUR62007573-RA	0h	24h	OK	27.0283	74.5475	1.46369	3.17903	5e-05	0.000327342	yes	coding	/
AUR62007580-RA	0h	24h	OK	19.6813	3.1356	-2.65001	-3.7875	5e-05	0.000327342	yes	coding	/
AUR62007584-RA	0h	24h	OK	69.1966	9.09713	-2.92722	-3.49317	0.00025	0.00147346	yes	coding	/
AUR62007591-RA	0h	24h	OK	77.687	24.8766	-1.64288	-2.92772	5e-05	0.000327342	yes	coding	/
AUR62007595-RA	0h	24h	OK	2.01928	5.99857	1.57078	1.76664	0.00595	0.0319258	yes	coding	/
AUR62007620-RA	0h	24h	OK	26.049	8.84563	-1.55819	-2.45156	5e-05	0.000327342	yes	coding	/
AUR62007621-RA	0h	24h	OK	147.952	47.5657	-1.63714	-3.81129	5e-05	0.000327342	yes	coding	/
AUR62007627-RA	0h	24h	OK	9.35385	1.13272	-3.04577	-2.79532	0.0004	0.00233755	yes	coding	/
AUR62007720-RA	0h	24h	OK	79.7698	17.6159	-2.17897	-4.00462	5e-05	0.000327342	yes	coding	/
AUR62007775-RA	0h	24h	OK	15.0074	102.196	2.76759	4.78381	5e-05	0.000327342	yes	coding	/
AUR62007776-RA	0h	24h	OK	6.10218	52.9374	3.11689	3.08221	5e-05	0.000327342	yes	coding	/
AUR62007822-RA	0h	24h	OK	5.81605	37.3084	2.68139	4.17468	5e-05	0.000327342	yes	coding	/
AUR62007828-RA	0h	24h	OK	9.76776	107.3	3.45748	5.03197	5e-05	0.000327342	yes	coding	/
AUR62007853-RA	0h	24h	OK	1.95246	0	#NAME?	#NAME?	5e-05	0.000327342	yes	coding	/
AUR62007905-RA	0h	24h	OK	676.202	336.244	-1.00794	-2.41937	5e-05	0.000327342	yes	coding	/
AUR62007926-RA	0h	24h	OK	29.6786	6.9136	-2.10191	-3.97438	5e-05	0.000327342	yes	coding	/
AUR62007952-RA	0h	24h	OK	5.75821	0	#NAME?	#NAME?	0.00015	0.000893574	yes	coding	/
AUR62007961-RA	0h	24h	OK	972.664	178.411	-2.44674	-4.30459	5e-05	0.000327342	yes	coding	/
AUR62007974-RA	0h	24h	OK	10.6665	1.9182	-2.47525	-2.14238	0.0011	0.00630043	yes	coding	/
AUR62007975-RA	0h	24h	OK	13.6414	35.7214	1.38879	1.90437	0.00275	0.0153829	yes	noncoding	LncRNA
AUR62007993-RA	0h	24h	OK	0	4.25792	inf	#NAME?	5e-05	0.000327342	yes	coding	/
AUR62008005-RA	0h	24h	OK	21.9108	8.84132	-1.30931	-2.10965	0.00015	0.000893574	yes	coding	/
AUR62008017-RA	0h	24h	OK	27.6234	12.4118	-1.15417	-2.17584	0.0005	0.00290939	yes	coding	/
AUR62008018-RA	0h	24h	OK	17.1053	6.09997	-1.48757	-2.54124	0.0001	0.000607975	yes	coding	/
AUR62008060-RA	0h	24h	OK	3.92479	12.867	1.71298	2.23489	0.001	0.00573806	yes	coding	/
AUR62008115-RA	0h	24h	OK	5.60865	1.68186	-1.73759	-1.79892	0.0075	0.0398201	yes	coding	/
AUR62008139-RA	0h	24h	OK	3.33483	20.5607	2.6242	1.95906	0.00865	0.0456181	yes	coding	/
AUR62008148-RA	0h	24h	OK	23.5181	4.85388	-2.27656	-2.92289	0.00095	0.00545853	yes	coding	/
AUR62008174-RA	0h	24h	OK	4.49788	0.73427	-2.61486	-2.05833	0.0085	0.0448578	yes	coding	/
AUR62008192-RA	0h	24h	OK	15.7675	7.51141	-1.0698	-1.65991	0.009	0.047354	yes	coding	/
AUR62008193-RA	0h	24h	OK	1.02978	0	#NAME?	#NAME?	5e-05	0.000327342	yes	coding	/
AUR62008224-RA	0h	24h	OK	16.5883	3.26261	-2.34607	-3.37914	5e-05	0.000327342	yes	coding	/
AUR62008228-RA	0h	24h	OK	13.9287	3.10166	-2.16695	-2.64069	0.0033	0.0181073	yes	coding	/
AUR62008267-RA	0h	24h	OK	153.966	43.8692	-1.81133	-4.25161	5e-05	0.000327342	yes	coding	/
AUR62008273-RA	0h	24h	OK	12.4611	29.9314	1.26423	2.08109	0.0009	0.00517825	yes	coding	/
AUR62008292-RA	0h	24h	OK	4.50366	0.886048	-2.34564	-2.03424	0.0019	0.0107415	yes	coding	/
AUR62008311-RA	0h	24h	OK	7.27584	2.37512	-1.61512	-2.01092	0.00515	0.0278137	yes	coding	/
AUR62008336-RA	0h	24h	OK	10.8283	3.36229	-1.6873	-2.20971	0.0018	0.0101886	yes	coding	/
AUR62008342-RA	0h	24h	OK	14.0887	2.0932	-2.75076	-3.27402	5e-05	0.000327342	yes	coding	/
AUR62008353-RA	0h	24h	OK	237.663	48.5499	-2.29138	-2.88364	5e-05	0.000327342	yes	coding	/
AUR62008408-RA	0h	24h	OK	7.63648	22.8321	1.58008	2.44381	5e-05	0.000327342	yes	coding	/
AUR62008415-RA	0h	24h	OK	287.5	37.5984	-2.93482	-5.76346	5e-05	0.000327342	yes	noncoding	LncRNA
AUR62008418-RA	0h	24h	OK	21.2424	8.2169	-1.37028	-1.94735	0.00435	0.0236443	yes	coding	/
AUR62008424-RA	0h	24h	OK	14.1715	43.895	1.63107	3.08108	5e-05	0.000327342	yes	coding	/
AUR62008438-RA	0h	24h	OK	11.4837	67.5476	2.55631	5.00836	5e-05	0.000327342	yes	coding	/
AUR62008505-RA	0h	24h	OK	102.952	51.0112	-1.01309	-2.23209	0.0001	0.000607975	yes	coding	/
AUR62008514-RA	0h	24h	OK	16.0955	35.6225	1.14613	2.46854	5e-05	0.000327342	yes	coding	/
AUR62008532-RA	0h	24h	OK	79.6501	25.0551	-1.66857	-2.43226	0.0003	0.00176267	yes	coding	/
AUR62008537-RA	0h	24h	OK	11.2168	3.51485	-1.67413	-2.38387	0.00075	0.00433205	yes	coding	/
AUR62008545-RA	0h	24h	OK	9.85704	23.4619	1.25109	2.25584	0.00035	0.00204936	yes	coding	/
AUR62008562-RA	0h	24h	OK	20.1848	55.124	1.44941	2.66087	5e-05	0.000327342	yes	coding	/
AUR62008609-RA	0h	24h	OK	233.662	822.1	1.81489	4.26297	5e-05	0.000327342	yes	coding	/
AUR62008617-RA	0h	24h	OK	0	9.64925	inf	#NAME?	5e-05	0.000327342	yes	coding	/
AUR62008647-RA	0h	24h	OK	6.15946	35.8729	2.54202	3.33412	5e-05	0.000327342	yes	coding	/
AUR62008649-RA	0h	24h	OK	2.22713	13.6141	2.61185	3.48415	5e-05	0.000327342	yes	coding	/
AUR62008655-RA	0h	24h	OK	38.1598	12.1885	-1.64653	-2.54799	0.0005	0.00290939	yes	coding	/
AUR62008668-RA	0h	24h	OK	30.3403	11.3863	-1.41394	-2.76952	5e-05	0.000327342	yes	coding	/
AUR62008681-RA	0h	24h	OK	437.196	2141.91	2.29254	4.8846	5e-05	0.000327342	yes	noncoding	LncRNA
AUR62008690-RA	0h	24h	OK	2.41486	6.64821	1.46103	1.66138	0.00745	0.0395651	yes	coding	/
AUR62008727-RA	0h	24h	OK	647.037	1617.74	1.32206	2.2908	0.00015	0.000893574	yes	coding	/
AUR62008734-RA	0h	24h	OK	13.0604	3.95545	-1.72329	-2.59414	0.0001	0.000607975	yes	coding	/
AUR62008765-RA	0h	24h	OK	1.65811	27.7586	4.06533	2.75715	0.00115	0.00657841	yes	noncoding	LncRNA
AUR62008766-RA	0h	24h	OK	29.2882	12.9928	-1.1726	-2.16802	0.00035	0.00204936	yes	coding	/
AUR62008776-RA	0h	24h	OK	4.99454	17.1353	1.77855	2.51643	0.0005	0.00290939	yes	coding	/
AUR62008786-RA	0h	24h	OK	580.331	272.551	-1.09035	-2.59499	5e-05	0.000327342	yes	coding	/
AUR62008795-RA	0h	24h	OK	43.8232	11.5731	-1.92092	-3.61213	5e-05	0.000327342	yes	coding	/
AUR62008801-RA	0h	24h	OK	9.47911	1.12751	-3.07162	-3.33938	5e-05	0.000327342	yes	coding	/
AUR62008853-RA	0h	24h	OK	8.42367	3.668	-1.19946	-1.85493	0.00515	0.0278137	yes	coding	/
AUR62008884-RA	0h	24h	OK	4.80259	31.1745	2.69848	4.22754	5e-05	0.000327342	yes	coding	/
AUR62008909-RA	0h	24h	OK	19.0963	45.2716	1.24532	1.98936	0.00085	0.00489598	yes	coding	/
AUR62008912-RA	0h	24h	OK	156.136	34.5012	-2.17808	-3.01845	5e-05	0.000327342	yes	coding	/
AUR62008927-RA	0h	24h	OK	4.07599	12.1874	1.58016	2.28176	0.0005	0.00290939	yes	coding	/
AUR62008929-RA	0h	24h	OK	36.4591	13.0934	-1.47744	-2.58263	0.0001	0.000607975	yes	coding	/
AUR62008994-RA	0h	24h	OK	1.76558	0	#NAME?	#NAME?	0.0005	0.00290939	yes	coding	/
AUR62009003-RA	0h	24h	OK	581.133	247.544	-1.23118	-2.78549	5e-05	0.000327342	yes	coding	/
AUR62009032-RA	0h	24h	OK	0.516608	10.5322	4.34959	2.78465	0.0007	0.00404934	yes	coding	/
AUR62009063-RA	0h	24h	OK	6.77292	1.92541	-1.81461	-2.07096	0.0039	0.0212736	yes	coding	/
AUR62009067-RA	0h	24h	OK	470.886	149.871	-1.65166	-3.82074	5e-05	0.000327342	yes	coding	/
AUR62009142-RA	0h	24h	OK	40.1995	17.2884	-1.21737	-2.45496	0.0001	0.000607975	yes	coding	/
AUR62009167-RA	0h	24h	OK	109.176	41.2198	-1.40525	-3.09518	5e-05	0.000327342	yes	coding	/
AUR62009174-RA	0h	24h	OK	107.8	22.5361	-2.25805	-3.27736	5e-05	0.000327342	yes	coding	/
AUR62009203-RA	0h	24h	OK	7.11097	1.86847	-1.92819	-2.0974	0.0016	0.00908395	yes	coding	/
AUR62009215-RA	0h	24h	OK	34.5328	14.5597	-1.24599	-2.18782	0.00085	0.00489598	yes	coding	/
AUR62009228-RA	0h	24h	OK	1.91854	6.14339	1.67903	2.16717	0.0015	0.00852791	yes	coding	/
AUR62009230-RA	0h	24h	OK	10.6669	0	#NAME?	#NAME?	5e-05	0.000327342	yes	coding	/
AUR62009235-RA	0h	24h	OK	6.63314	14.793	1.15715	2.05353	0.0009	0.00517825	yes	coding	/
AUR62009297-RA	0h	24h	OK	331.426	66.387	-2.31971	-5.22982	5e-05	0.000327342	yes	coding	/
AUR62009365-RA	0h	24h	OK	6.45355	2.65768	-1.27993	-2.06804	0.0009	0.00517825	yes	coding	/
AUR62009370-RA	0h	24h	OK	2.22343	10.2252	2.20128	2.67091	0.0002	0.00118357	yes	coding	/
AUR62009398-RA	0h	24h	OK	9.97446	4.33161	-1.20334	-2.16325	0.00065	0.00376631	yes	coding	/
AUR62009433-RA	0h	24h	OK	1.82762	9.27663	2.34363	2.49991	0.00045	0.00262489	yes	coding	/
AUR62009451-RA	0h	24h	OK	2.50549	0	#NAME?	#NAME?	5e-05	0.000327342	yes	coding	/
AUR62009478-RA	0h	24h	OK	31.1152	71.979	1.20996	2.42256	5e-05	0.000327342	yes	coding	/
AUR62009489-RA	0h	24h	OK	26.2584	69.8168	1.4108	3.0013	5e-05	0.000327342	yes	coding	/
AUR62009523-RA	0h	24h	OK	13.8829	33.8719	1.28678	2.27869	5e-05	0.000327342	yes	coding	/
AUR62009559-RA	0h	24h	OK	51.1013	16.8926	-1.59697	-2.87449	0.0001	0.000607975	yes	coding	/
AUR62009612-RA	0h	24h	OK	197.384	53.1652	-1.89245	-1.79395	0.0069	0.0367907	yes	coding	/
AUR62009615-RA	0h	24h	OK	1015.23	275.863	-1.87978	-4.40226	5e-05	0.000327342	yes	coding	/
AUR62009628-RA	0h	24h	OK	1626.76	476.706	-1.77083	-3.6296	5e-05	0.000327342	yes	coding	/
AUR62009669-RA	0h	24h	OK	11.0261	36.4505	1.72501	1.8042	0.0042	0.0228529	yes	coding	/
AUR62009692-RA	0h	24h	OK	17.7842	6.16882	-1.52753	-1.93338	0.00175	0.00991359	yes	coding	/
AUR62009704-RA	0h	24h	OK	5.16302	45.8387	3.15028	2.55321	0.0011	0.00630043	yes	coding	/
AUR62009706-RA	0h	24h	OK	20.023	64.0723	1.67804	3.14595	5e-05	0.000327342	yes	coding	/
AUR62009710-RA	0h	24h	OK	5.83063	21.816	1.90366	2.28263	0.00015	0.000893574	yes	coding	/
AUR62009723-RA	0h	24h	OK	4.73916	28.9496	2.61084	3.14799	5e-05	0.000327342	yes	coding	/
AUR62009735-RA	0h	24h	OK	324.157	143.29	-1.17775	-2.70501	5e-05	0.000327342	yes	coding	/
AUR62009737-RA	0h	24h	OK	11.0825	1.42587	-2.95837	-2.34786	0.00755	0.040075	yes	coding	/
AUR62009738-RA	0h	24h	OK	12.8806	5.31955	-1.27582	-1.84597	0.00225	0.0126629	yes	coding	/
AUR62009740-RA	0h	24h	OK	17.8117	0	#NAME?	#NAME?	5e-05	0.000327342	yes	coding	/
AUR62009746-RA	0h	24h	OK	11.7026	1.5647	-2.90288	-3.31496	5e-05	0.000327342	yes	coding	/
AUR62009753-RA	0h	24h	OK	7.88091	27.8914	1.82339	2.538	0.0001	0.000607975	yes	coding	/
AUR62009757-RA	0h	24h	OK	357.407	64.9305	-2.4606	-5.44342	5e-05	0.000327342	yes	coding	/
AUR62009758-RA	0h	24h	OK	30.079	0	#NAME?	#NAME?	5e-05	0.000327342	yes	coding	/
AUR62009771-RA	0h	24h	OK	2.1695	0	#NAME?	#NAME?	5e-05	0.000327342	yes	coding	/
AUR62009789-RA	0h	24h	OK	13.5175	3.38404	-1.99802	-2.59821	0.00025	0.00147346	yes	coding	/
AUR62009794-RA	0h	24h	OK	1373.89	499.899	-1.45855	-3.32385	5e-05	0.000327342	yes	coding	/
AUR62009799-RA	0h	24h	OK	16.7124	4.94012	-1.7583	-1.66785	0.00935	0.0491074	yes	coding	/
AUR62009819-RA	0h	24h	OK	4.02091	15.2161	1.92	2.67156	5e-05	0.000327342	yes	coding	/
AUR62009846-RA	0h	24h	OK	58.121	25.7229	-1.176	-1.97628	0.00075	0.00433205	yes	coding	/
AUR62009874-RA	0h	24h	OK	383.776	31.4225	-3.61039	-6.01841	5e-05	0.000327342	yes	coding	/
AUR62009875-RA	0h	24h	OK	142.086	16.5928	-3.09813	-2.76512	5e-05	0.000327342	yes	coding	/
AUR62009877-RA	0h	24h	OK	362.607	41.1128	-3.14075	-4.12679	5e-05	0.000327342	yes	coding	/
AUR62009884-RA	0h	24h	OK	39.1949	8.67292	-2.17608	-3.37493	5e-05	0.000327342	yes	coding	/
AUR62009909-RA	0h	24h	OK	43.3604	21.5487	-1.00878	-2.27518	0.0001	0.000607975	yes	coding	/
AUR62009916-RA	0h	24h	OK	18.293	8.15424	-1.16567	-1.74128	0.0079	0.0418241	yes	coding	/
AUR62009936-RA	0h	24h	OK	554.761	171.45	-1.69408	-3.96519	5e-05	0.000327342	yes	coding	/
AUR62009951-RA	0h	24h	OK	27.8093	7.8133	-1.83156	-3.45126	5e-05	0.000327342	yes	coding	/
AUR62009981-RA	0h	24h	OK	30.0721	8.04303	-1.90262	-3.60136	5e-05	0.000327342	yes	coding	/
AUR62009985-RA	0h	24h	OK	11.4492	1.26518	-3.17783	-3.02541	0.00035	0.00204936	yes	coding	/
AUR62009996-RA	0h	24h	OK	24.4652	95.7018	1.96782	4.28987	5e-05	0.000327342	yes	coding	/
AUR62009997-RA	0h	24h	OK	13.6381	1.18966	-3.51902	-2.85697	0.0028	0.0156529	yes	coding	/
AUR62010019-RA	0h	24h	OK	6.2617	17.848	1.51114	2.94865	5e-05	0.000327342	yes	coding	/
AUR62010035-RA	0h	24h	OK	19.022	48.1084	1.33862	2.69083	5e-05	0.000327342	yes	coding	/
AUR62010052-RA	0h	24h	OK	9.08185	3.34653	-1.44032	-2.10313	0.0006	0.00348122	yes	coding	/
AUR62010059-RA	0h	24h	OK	17.2301	3.18218	-2.43685	-3.23233	5e-05	0.000327342	yes	coding	/
AUR62010068-RA	0h	24h	OK	24.6951	4.36522	-2.5001	-3.36726	5e-05	0.000327342	yes	coding	/
AUR62010119-RA	0h	24h	OK	6.32075	2.54934	-1.30997	-1.92586	0.0039	0.0212736	yes	coding	/
AUR62010135-RA	0h	24h	OK	30.8336	10.3309	-1.57754	-2.88639	5e-05	0.000327342	yes	coding	/
AUR62010140-RA	0h	24h	OK	1.62594	4.73888	1.54328	1.75935	0.00395	0.0215376	yes	coding	/
AUR62010163-RA	0h	24h	OK	15.4046	3.86188	-1.99599	-2.69331	0.0006	0.00348122	yes	coding	/
AUR62010210-RA	0h	24h	OK	32.0677	13.323	-1.26721	-2.40047	5e-05	0.000327342	yes	coding	/
AUR62010218-RA	0h	24h	OK	82.2811	36.6176	-1.16802	-2.30353	0.0002	0.00118357	yes	coding	/
AUR62010278-RA	0h	24h	OK	12.8411	39.0329	1.60392	2.3839	0.00035	0.00204936	yes	coding	/
AUR62010286-RA	0h	24h	OK	75.0499	20.9009	-1.84428	-2.43842	0.0066	0.0352646	yes	coding	/
AUR62010312-RA	0h	24h	OK	52.6883	122.087	1.21235	2.81498	5e-05	0.000327342	yes	coding	/
AUR62010315-RA	0h	24h	OK	136.627	40.8417	-1.74213	-3.60889	5e-05	0.000327342	yes	coding	/
AUR62010333-RA	0h	24h	OK	14.8783	3.6319	-2.03442	-2.72675	5e-05	0.000327342	yes	coding	/
AUR62010377-RA	0h	24h	OK	557.973	184.128	-1.59949	-3.71861	5e-05	0.000327342	yes	coding	/
AUR62010431-RA	0h	24h	OK	40.9801	19.4245	-1.07705	-2.15635	0.00075	0.00433205	yes	coding	/
AUR62010449-RA	0h	24h	OK	451.873	137.832	-1.71301	-3.24643	5e-05	0.000327342	yes	coding	/
AUR62010458-RA	0h	24h	OK	21.1982	9.32709	-1.18445	-2.12579	0.0004	0.00233755	yes	coding	/
AUR62010471-RA	0h	24h	OK	18.4918	5.06037	-1.86957	-3.23811	5e-05	0.000327342	yes	coding	/
AUR62010474-RA	0h	24h	OK	93.789	30.3132	-1.62948	-3.11099	5e-05	0.000327342	yes	coding	/
AUR62010507-RA	0h	24h	OK	6.339	1.99582	-1.66727	-1.74872	0.00845	0.0445983	yes	coding	/
AUR62010578-RA	0h	24h	OK	146.78	55.7712	-1.39606	-3.27356	5e-05	0.000327342	yes	coding	/
AUR62010579-RA	0h	24h	OK	64.5271	24.3903	-1.4036	-3.08412	5e-05	0.000327342	yes	coding	/
AUR62010584-RA	0h	24h	OK	85.6013	216.741	1.34027	3.18589	5e-05	0.000327342	yes	coding	/
AUR62010669-RA	0h	24h	OK	11.771	5.73769	-1.03669	-1.63821	0.00885	0.0466073	yes	coding	/
AUR62010721-RA	0h	24h	OK	22.4689	9.72105	-1.20875	-2.20148	0.00015	0.000893574	yes	coding	/
AUR62010741-RA	0h	24h	OK	275.954	101.998	-1.43589	-3.3219	5e-05	0.000327342	yes	coding	/
AUR62010767-RA	0h	24h	OK	12.745	4.29233	-1.57009	-1.91873	0.00475	0.0257387	yes	coding	/
AUR62010793-RA	0h	24h	OK	157.794	29.7332	-2.4079	-5.52806	5e-05	0.000327342	yes	coding	/
AUR62010801-RA	0h	24h	OK	0	2.12797	inf	#NAME?	5e-05	0.000327342	yes	coding	/
AUR62010837-RA	0h	24h	OK	9.97953	26.5629	1.41237	2.73713	5e-05	0.000327342	yes	coding	/
AUR62010854-RA	0h	24h	OK	4.1445	15.1055	1.86581	1.80905	0.0083	0.0438482	yes	coding	/
AUR62010870-RA	0h	24h	OK	873.793	294.649	-1.5683	-3.184	5e-05	0.000327342	yes	coding	/
AUR62010871-RA	0h	24h	OK	208.838	77.3382	-1.43313	-2.02603	0.0017	0.00963746	yes	coding	/
AUR62010915-RA	0h	24h	OK	6.80509	17.9437	1.39879	2.02381	0.00115	0.00657841	yes	coding	/
AUR62010955-RA	0h	24h	OK	68.5292	30.8085	-1.15339	-2.38464	0.0002	0.00118357	yes	coding	/
AUR62010975-RA	0h	24h	OK	2.82754	0	#NAME?	#NAME?	5e-05	0.000327342	yes	coding	/
AUR62010997-RA	0h	24h	OK	19.4819	75.6453	1.95711	3.90999	5e-05	0.000327342	yes	coding	/
AUR62011047-RA	0h	24h	OK	29.4591	9.56843	-1.62236	-2.89397	5e-05	0.000327342	yes	coding	/
AUR62011061-RA	0h	24h	OK	30.1941	7.86749	-1.94029	-2.126	0.00115	0.00657841	yes	coding	/
AUR62011107-RA	0h	24h	OK	300.564	72.2089	-2.05742	-4.79372	5e-05	0.000327342	yes	coding	/
AUR62011121-RA	0h	24h	OK	303.281	119.813	-1.33987	-2.90193	5e-05	0.000327342	yes	coding	/
AUR62011131-RA	0h	24h	OK	11.7598	52.2265	2.15092	2.06946	0.0027	0.0151148	yes	coding	/
AUR62011150-RA	0h	24h	OK	31.888	68.8882	1.11125	2.51649	5e-05	0.000327342	yes	coding	/
AUR62011175-RA	0h	24h	OK	7.50009	61.8032	3.0427	6.17721	5e-05	0.000327342	yes	coding	/
AUR62011208-RA	0h	24h	OK	112.07	40.0865	-1.48322	-2.99269	5e-05	0.000327342	yes	coding	/
AUR62011210-RA	0h	24h	OK	2.99447	23.6417	2.98096	2.65307	0.00025	0.00147346	yes	coding	/
AUR62011228-RA	0h	24h	OK	3.30831	7.71451	1.22148	1.62836	0.00845	0.0445983	yes	coding	/
AUR62011269-RA	0h	24h	OK	63.1566	16.216	-1.96151	-3.20394	5e-05	0.000327342	yes	coding	/
AUR62011292-RA	0h	24h	OK	60.416	12.8718	-2.23072	-2.90558	5e-05	0.000327342	yes	coding	/
AUR62011301-RA	0h	24h	OK	73.7774	31.5762	-1.22434	-2.72905	5e-05	0.000327342	yes	coding	/
AUR62011323-RA	0h	24h	OK	107.436	52.7006	-1.02759	-2.29511	0.0001	0.000607975	yes	coding	/
AUR62011337-RA	0h	24h	OK	10.805	1.98838	-2.44204	-3.62327	5e-05	0.000327342	yes	coding	/
AUR62011380-RA	0h	24h	OK	374.86	183.672	-1.02922	-2.36474	5e-05	0.000327342	yes	coding	/
AUR62011395-RA	0h	24h	OK	0.994391	10.2011	3.35876	3.21034	0.00015	0.000893574	yes	coding	/
AUR62011410-RA	0h	24h	OK	2.87831	31.2886	3.44235	3.18457	0.0001	0.000607975	yes	coding	/
AUR62011422-RA	0h	24h	OK	55.615	24.0983	-1.20654	-2.73514	5e-05	0.000327342	yes	coding	/
AUR62011431-RA	0h	24h	OK	7.10725	45.8343	2.68906	3.31985	5e-05	0.000327342	yes	coding	/
AUR62011462-RA	0h	24h	OK	11.8488	5.17319	-1.19562	-1.74513	0.00535	0.0288484	yes	coding	/
AUR62011495-RA	0h	24h	OK	44.673	4.63047	-3.27017	-5.56953	5e-05	0.000327342	yes	coding	/
AUR62011545-RA	0h	24h	OK	102.335	33.3753	-1.61645	-3.6485	5e-05	0.000327342	yes	coding	/
AUR62011562-RA	0h	24h	OK	6.93257	17.0483	1.29817	1.7573	0.00325	0.0180702	yes	coding	/
AUR62011571-RA	0h	24h	OK	2.70349	29.0863	3.42744	3.15949	0.00645	0.0344997	yes	coding	/
AUR62011577-RA	0h	24h	OK	118.581	19.1097	-2.6335	-5.4607	5e-05	0.000327342	yes	coding	/
AUR62011586-RA	0h	24h	OK	172.342	47.7333	-1.85221	-3.32367	0.001	0.00573806	yes	coding	/
AUR62011592-RA	0h	24h	OK	33.1909	12.1165	-1.45381	-2.79685	5e-05	0.000327342	yes	coding	/
AUR62011618-RA	0h	24h	OK	10.1171	25.3415	1.3247	1.74397	0.0049	0.026523	yes	coding	/
AUR62011624-RA	0h	24h	OK	20.1374	4.82414	-2.06154	-2.46479	0.00525	0.0283319	yes	coding	/
AUR62011641-RA	0h	24h	OK	162.262	59.6394	-1.44399	-3.43735	5e-05	0.000327342	yes	coding	/
AUR62011647-RA	0h	24h	OK	0	69.3569	inf	#NAME?	0.0001	0.000607975	yes	noncoding	LncRNA
AUR62011682-RA	0h	24h	OK	9.88007	4.17475	-1.24283	-1.69146	0.00605	0.0324419	yes	coding	/
AUR62011708-RA	0h	24h	OK	117.684	244.642	1.05576	2.42675	5e-05	0.000327342	yes	coding	/
AUR62011733-RA	0h	24h	OK	17.0809	34.9384	1.03243	1.63722	0.0046	0.0249485	yes	coding	/
AUR62011747-RA	0h	24h	OK	21.9599	7.09419	-1.63016	-2.6344	0.00015	0.000893574	yes	coding	/
AUR62011765-RA	0h	24h	OK	9.1845	2.09369	-2.13315	-2.03302	0.0029	0.0161962	yes	coding	/
AUR62011799-RA	0h	24h	OK	49.5617	12.9801	-1.93293	-2.49875	0.00505	0.0273074	yes	coding	/
AUR62011819-RA	0h	24h	OK	1.54953	19.5635	3.65826	2.69733	0.0027	0.0151148	yes	coding	/
AUR62011832-RA	0h	24h	OK	82.69	17.1918	-2.26599	-2.78358	5e-05	0.000327342	yes	coding	/
AUR62011857-RA	0h	24h	OK	31.7241	15.0456	-1.07623	-2.0255	0.0008	0.00461507	yes	coding	/
AUR62011858-RA	0h	24h	OK	57.0877	22.0616	-1.37164	-2.82559	5e-05	0.000327342	yes	coding	/
AUR62011924-RA	0h	24h	OK	224.47	62.8135	-1.83738	-4.20219	5e-05	0.000327342	yes	coding	/
AUR62011950-RA	0h	24h	OK	40.0662	15.2253	-1.39591	-2.25353	0.00075	0.00433205	yes	coding	/
AUR62011968-RA	0h	24h	OK	23.1171	69.7004	1.59221	3.25229	5e-05	0.000327342	yes	coding	/
AUR62012017-RA	0h	24h	OK	1137.95	378.479	-1.58816	-3.74184	5e-05	0.000327342	yes	coding	/
AUR62012026-RA	0h	24h	OK	6.18676	31.6436	2.35466	3.14081	5e-05	0.000327342	yes	coding	/
AUR62012085-RA	0h	24h	OK	1410.3	121.765	-3.53383	-4.70492	5e-05	0.000327342	yes	coding	/
AUR62012090-RA	0h	24h	OK	2.63518	18.0059	2.77249	2.58788	0.0007	0.00404934	yes	coding	/
AUR62012104-RA	0h	24h	OK	74.8618	32.8436	-1.18862	-2.46744	5e-05	0.000327342	yes	coding	/
AUR62012118-RA	0h	24h	OK	11.4666	2.10752	-2.44382	-2.84783	0.00035	0.00204936	yes	coding	/
AUR62012136-RA	0h	24h	OK	28.3441	94.3256	1.7346	3.83423	5e-05	0.000327342	yes	coding	/
AUR62012145-RA	0h	24h	OK	77.0412	17.3294	-2.15241	-2.88674	5e-05	0.000327342	yes	coding	/
AUR62012165-RA	0h	24h	OK	5.45553	1.34888	-2.01596	-2.11037	0.0021	0.011841	yes	coding	/
AUR62012190-RA	0h	24h	OK	596.33	181.746	-1.71418	-3.98527	5e-05	0.000327342	yes	coding	/
AUR62012191-RA	0h	24h	OK	22.51	6.82692	-1.72126	-2.18577	0.00115	0.00657841	yes	coding	/
AUR62012222-RA	0h	24h	OK	1710.61	370.477	-2.20705	-3.33382	5e-05	0.000327342	yes	coding	/
AUR62012224-RA	0h	24h	OK	3.79201	9.45468	1.31807	1.77009	0.003	0.0167171	yes	coding	/
AUR62012233-RA	0h	24h	OK	36.4708	160.906	2.14141	4.67657	5e-05	0.000327342	yes	coding	/
AUR62012234-RA	0h	24h	OK	8.86922	3.02118	-1.5537	-2.27726	0.00075	0.00433205	yes	coding	/
AUR62012258-RA	0h	24h	OK	8.84915	38.3889	2.11708	2.99608	5e-05	0.000327342	yes	coding	/
AUR62012262-RA	0h	24h	OK	22.2111	6.9696	-1.67213	-3.07305	5e-05	0.000327342	yes	coding	/
AUR62012270-RA	0h	24h	OK	21.846	6.41939	-1.76686	-2.51387	0.00085	0.00489598	yes	coding	/
AUR62012300-RA	0h	24h	OK	80.9626	26.5808	-1.60687	-3.1053	5e-05	0.000327342	yes	coding	/
AUR62012302-RA	0h	24h	OK	12.1645	2.52303	-2.26945	-2.42464	0.0012	0.00685616	yes	coding	/
AUR62012318-RA	0h	24h	OK	1.93369	17.6046	3.18652	2.92325	0.00055	0.00319537	yes	coding	/
AUR62012319-RA	0h	24h	OK	49.2558	14.6697	-1.74745	-3.19682	5e-05	0.000327342	yes	coding	/
AUR62012339-RA	0h	24h	OK	28.4553	6.33934	-2.16629	-2.88924	0.0001	0.000607975	yes	coding	/
AUR62012341-RA	0h	24h	OK	17.8793	6.899	-1.37383	-2.35079	0.00015	0.000893574	yes	coding	/
AUR62012344-RA	0h	24h	OK	13.208	34.8805	1.40101	2.42567	0.0002	0.00118357	yes	coding	/
AUR62012347-RA	0h	24h	OK	5.10306	31.7724	2.63834	3.47114	5e-05	0.000327342	yes	coding	/
AUR62012381-RA	0h	24h	OK	29.7695	13.0006	-1.19525	-1.74412	0.00515	0.0278137	yes	coding	/
AUR62012399-RA	0h	24h	OK	2.48954	0	#NAME?	#NAME?	5e-05	0.000327342	yes	coding	/
AUR62012439-RA	0h	24h	OK	516.341	225.311	-1.1964	-2.89981	5e-05	0.000327342	yes	coding	/
AUR62012440-RA	0h	24h	OK	7.07231	15.7887	1.15864	1.90263	0.00145	0.0082515	yes	coding	/
AUR62012448-RA	0h	24h	OK	7.76884	2.16369	-1.84421	-2.78886	5e-05	0.000327342	yes	coding	/
AUR62012467-RA	0h	24h	OK	6.79045	0.864295	-2.97391	-2.25666	0.00345	0.0188988	yes	coding	/
AUR62012604-RA	0h	24h	OK	8.54483	0.867662	-3.29985	-2.50711	0.0015	0.00852791	yes	coding	/
AUR62012652-RA	0h	24h	OK	55.8689	5.95176	-3.23066	-4.02758	5e-05	0.000327342	yes	coding	/
AUR62012666-RA	0h	24h	OK	2.03766	5.64353	1.46969	2.16278	0.00095	0.00545853	yes	coding	/
AUR62012681-RA	0h	24h	OK	32.7415	15.628	-1.06699	-1.85773	0.00405	0.022068	yes	coding	/
AUR62012683-RA	0h	24h	OK	5.89259	0	#NAME?	#NAME?	0.0004	0.00233755	yes	coding	/
AUR62012708-RA	0h	24h	OK	105.168	37.2434	-1.49764	-3.12801	5e-05	0.000327342	yes	coding	/
AUR62012719-RA	0h	24h	OK	56.3632	169.153	1.5855	3.78356	5e-05	0.000327342	yes	coding	/
AUR62012724-RA	0h	24h	OK	22.041	2.29299	-3.26489	-2.45978	0.00455	0.0246898	yes	coding	/
AUR62012728-RA	0h	24h	OK	71.6305	30.6805	-1.22325	-2.64168	5e-05	0.000327342	yes	coding	/
AUR62012748-RA	0h	24h	OK	903.447	394.68	-1.19476	-2.32791	5e-05	0.000327342	yes	coding	/
AUR62012761-RA	0h	24h	OK	2.27629	0	#NAME?	#NAME?	5e-05	0.000327342	yes	coding	/
AUR62012840-RA	0h	24h	OK	31.8908	2.54159	-3.64934	-2.72971	0.0019	0.0107415	yes	coding	/
AUR62012884-RA	0h	24h	OK	38.1076	8.80749	-2.11328	-2.85671	0.0002	0.00118357	yes	coding	/
AUR62012885-RA	0h	24h	OK	2.34894	0	#NAME?	#NAME?	5e-05	0.000327342	yes	coding	/
AUR62012891-RA	0h	24h	OK	18.3142	1.50433	-3.60577	-2.86014	0.0008	0.00461507	yes	coding	/
AUR62012893-RA	0h	24h	OK	61.8561	30.1839	-1.03514	-2.10826	0.0004	0.00233755	yes	coding	/
AUR62012922-RA	0h	24h	OK	59.7672	129.968	1.12073	2.36314	5e-05	0.000327342	yes	coding	/
AUR62012927-RA	0h	24h	OK	32.7496	86.6928	1.40444	2.50614	0.00015	0.000893574	yes	coding	/
AUR62012930-RA	0h	24h	OK	12.2746	28.0801	1.19387	1.88454	0.00295	0.0164629	yes	coding	/
AUR62012950-RA	0h	24h	OK	9.05074	79.4616	3.13415	4.36095	5e-05	0.000327342	yes	coding	/
AUR62012970-RA	0h	24h	OK	30.6083	13.079	-1.22667	-2.44399	5e-05	0.000327342	yes	coding	/
AUR62012999-RA	0h	24h	OK	45.4483	115.558	1.34631	2.94031	5e-05	0.000327342	yes	coding	/
AUR62013023-RA	0h	24h	OK	10.5004	36.133	1.78287	3.19872	5e-05	0.000327342	yes	coding	/
AUR62013029-RA	0h	24h	OK	52.2071	23.7338	-1.1373	-2.45115	5e-05	0.000327342	yes	coding	/
AUR62013058-RA	0h	24h	OK	38.4624	8.78934	-2.12962	-2.90173	0.00035	0.00204936	yes	coding	/
AUR62013199-RA	0h	24h	OK	107.844	14.0525	-2.94004	-5.11518	5e-05	0.000327342	yes	coding	/
AUR62013222-RA	0h	24h	OK	15.735	2.43458	-2.69223	-3.21117	5e-05	0.000327342	yes	coding	/
AUR62013236-RA	0h	24h	OK	9.47224	3.45664	-1.45434	-2.04824	0.00415	0.0225938	yes	coding	/
AUR62013250-RA	0h	24h	OK	13.9742	4.40234	-1.66642	-1.57767	0.00925	0.048606	yes	coding	/
AUR62013261-RA	0h	24h	OK	5.88157	1.07712	-2.44902	-2.15395	0.0016	0.00908395	yes	coding	/
AUR62013271-RA	0h	24h	OK	3.88688	15.8439	2.02724	2.34553	0.00035	0.00204936	yes	coding	/
AUR62013279-RA	0h	24h	OK	296.887	64.2242	-2.20873	-4.38579	5e-05	0.000327342	yes	coding	/
AUR62013289-RA	0h	24h	OK	14.5224	2.36661	-2.61739	-2.46213	0.00065	0.00376631	yes	coding	/
AUR62013292-RA	0h	24h	OK	3.6975	1.01735	-1.86174	-1.77933	0.0068	0.0362719	yes	coding	/
AUR62013313-RA	0h	24h	OK	12.6667	4.46315	-1.50491	-2.11855	0.00125	0.00713476	yes	coding	/
AUR62013333-RA	0h	24h	OK	2.82436	0	#NAME?	#NAME?	0.00015	0.000893574	yes	coding	/
AUR62013370-RA	0h	24h	OK	322.343	97.7108	-1.72201	-2.83401	5e-05	0.000327342	yes	coding	/
AUR62013422-RA	0h	24h	OK	102.219	2.68595	-5.25009	-4.08716	0.00035	0.00204936	yes	coding	/
AUR62013463-RA	0h	24h	OK	16.8684	106.67	2.66076	3.49874	5e-05	0.000327342	yes	coding	/
AUR62013472-RA	0h	24h	OK	93.8828	25.2759	-1.8931	-4.01674	5e-05	0.000327342	yes	coding	/
AUR62013524-RA	0h	24h	OK	1.38815	0	#NAME?	#NAME?	0.00745	0.0395651	yes	coding	/
AUR62013567-RA	0h	24h	OK	3.29423	0	#NAME?	#NAME?	5e-05	0.000327342	yes	coding	/
AUR62013573-RA	0h	24h	OK	2.37635	58.3051	4.6168	5.24384	5e-05	0.000327342	yes	coding	/
AUR62013622-RA	0h	24h	OK	109.494	54.0099	-1.01955	-2.13404	0.0003	0.00176267	yes	noncoding	LncRNA
AUR62013642-RA	0h	24h	OK	5.74625	1.71025	-1.74842	-2.00714	0.0014	0.00797175	yes	coding	/
AUR62013691-RA	0h	24h	OK	20.0746	3.72641	-2.42952	-2.42925	0.00125	0.00713476	yes	coding	/
AUR62013720-RA	0h	24h	OK	58.6342	11.2103	-2.38692	-3.04205	0.00265	0.0148421	yes	coding	/
AUR62013733-RA	0h	24h	OK	9.94242	3.08833	-1.68677	-2.55104	0.0001	0.000607975	yes	coding	/
AUR62013776-RA	0h	24h	OK	622.075	220.221	-1.49814	-2.63773	5e-05	0.000327342	yes	coding	/
AUR62013785-RA	0h	24h	OK	3.80032	0.655385	-2.5357	-1.66585	0.00855	0.0451069	yes	coding	/
AUR62013819-RA	0h	24h	OK	460.897	152.909	-1.59177	-3.71726	5e-05	0.000327342	yes	coding	/
AUR62013836-RA	0h	24h	OK	123.095	6.79462	-4.17923	-7.67774	5e-05	0.000327342	yes	coding	/
AUR62013840-RA	0h	24h	OK	13.4732	4.87123	-1.46773	-2.3939	0.00045	0.00262489	yes	coding	/
AUR62013893-RA	0h	24h	OK	2.52001	13.1509	2.38366	2.48549	0.001	0.00573806	yes	coding	/
AUR62013906-RA	0h	24h	OK	15.5196	0	#NAME?	#NAME?	5e-05	0.000327342	yes	noncoding	LncRNA
AUR62013977-RA	0h	24h	OK	215.329	10.7986	-4.31763	-8.46326	5e-05	0.000327342	yes	coding	/
AUR62014023-RA	0h	24h	OK	20.8821	5.87177	-1.8304	-2.42102	0.0007	0.00404934	yes	coding	/
AUR62014124-RA	0h	24h	OK	432.489	111.894	-1.95054	-4.13323	5e-05	0.000327342	yes	coding	/
AUR62014139-RA	0h	24h	OK	4.26156	15.1599	1.8308	2.59216	0.00035	0.00204936	yes	coding	/
AUR62014169-RA	0h	24h	OK	18.8349	8.83754	-1.09169	-1.54644	0.0083	0.0438482	yes	coding	/
AUR62014204-RA	0h	24h	OK	2.49592	24.1626	3.27513	2.88682	0.00015	0.000893574	yes	coding	/
AUR62014220-RA	0h	24h	OK	28.0229	10.6868	-1.39077	-2.15418	0.00125	0.00713476	yes	coding	/
AUR62014231-RA	0h	24h	OK	458.917	117.351	-1.9674	-4.39589	5e-05	0.000327342	yes	coding	/
AUR62014305-RA	0h	24h	OK	5.99119	1.1879	-2.33443	-2.60633	0.0017	0.00963746	yes	coding	/
AUR62014317-RA	0h	24h	OK	9.63243	23.7662	1.30294	2.35756	0.0001	0.000607975	yes	coding	/
AUR62014330-RA	0h	24h	OK	11.6443	23.4187	1.00804	1.67323	0.0053	0.0285903	yes	coding	/
AUR62014436-RA	0h	24h	OK	10.4106	24.9974	1.26372	2.08457	0.00075	0.00433205	yes	coding	/
AUR62014444-RA	0h	24h	OK	20.5861	3.01931	-2.76938	-2.55811	0.0008	0.00461507	yes	coding	/
AUR62014445-RA	0h	24h	OK	3.36778	0	#NAME?	#NAME?	0.00015	0.000893574	yes	coding	/
AUR62014449-RA	0h	24h	OK	138.146	36.746	-1.91053	-4.16597	5e-05	0.000327342	yes	coding	/
AUR62014467-RA	0h	24h	OK	3.33786	7.60216	1.18748	1.58844	0.00725	0.0385499	yes	coding	/
AUR62014474-RA	0h	24h	OK	45.009	17.3028	-1.37921	-2.79969	5e-05	0.000327342	yes	coding	/
AUR62014478-RA	0h	24h	OK	2.54088	37.2991	3.87574	2.6392	0.0026	0.0145707	yes	coding	/
AUR62014485-RA	0h	24h	OK	15.46	5.68235	-1.44398	-2.28518	0.00035	0.00204936	yes	coding	/
AUR62014500-RA	0h	24h	OK	21.4001	275.026	3.68388	5.40165	5e-05	0.000327342	yes	coding	/
AUR62014501-RA	0h	24h	OK	52.649	109.452	1.05582	1.63783	0.00575	0.0308887	yes	coding	/
AUR62014503-RA	0h	24h	OK	621.793	156.713	-1.98831	-4.65989	5e-05	0.000327342	yes	coding	/
AUR62014508-RA	0h	24h	OK	6.18649	2.97634	-1.05558	-1.60135	0.0072	0.0383131	yes	coding	/
AUR62014540-RA	0h	24h	OK	7.71496	29.528	1.93635	2.80981	5e-05	0.000327342	yes	coding	/
AUR62014544-RA	0h	24h	OK	26.6273	8.87095	-1.58574	-2.36283	0.0002	0.00118357	yes	coding	/
AUR62014562-RA	0h	24h	OK	4.62524	37.5733	3.02211	4.48487	5e-05	0.000327342	yes	coding	/
AUR62014578-RA	0h	24h	OK	52.7703	12.0652	-2.12887	-3.99331	5e-05	0.000327342	yes	coding	/
AUR62014621-RA	0h	24h	OK	118.826	29.9962	-1.986	-1.87659	0.0046	0.0249485	yes	coding	/
AUR62014652-RA	0h	24h	OK	177.752	52.5605	-1.75782	-3.75481	5e-05	0.000327342	yes	coding	/
AUR62014695-RA	0h	24h	OK	10.4985	1.66888	-2.65323	-1.65847	0.00615	0.0329562	yes	coding	/
AUR62014699-RA	0h	24h	OK	0	56.8032	inf	#NAME?	5e-05	0.000327342	yes	coding	/
AUR62014725-RA	0h	24h	OK	55.3992	111.687	1.01152	1.69151	0.0052	0.0280715	yes	coding	/
AUR62014733-RA	0h	24h	OK	356.636	102.126	-1.8041	-4.25894	5e-05	0.000327342	yes	coding	/
AUR62014748-RA	0h	24h	OK	59.1959	26.1982	-1.17603	-2.5349	5e-05	0.000327342	yes	coding	/
AUR62014776-RA	0h	24h	OK	20.4881	4.59607	-2.15631	-3.24451	5e-05	0.000327342	yes	coding	/
AUR62014794-RA	0h	24h	OK	4.0499	246.735	5.92893	5.53393	5e-05	0.000327342	yes	coding	/
AUR62014809-RA	0h	24h	OK	28.6686	8.06628	-1.82949	-3.10139	5e-05	0.000327342	yes	coding	/
AUR62014826-RA	0h	24h	OK	1.52608	21.9046	3.84333	2.54212	0.0038	0.0207464	yes	coding	/
AUR62014827-RA	0h	24h	OK	16.6234	35.662	1.10117	2.27905	0.00015	0.000893574	yes	coding	/
AUR62014830-RA	0h	24h	OK	4.21577	9.98631	1.24415	2.0903	0.0004	0.00233755	yes	coding	/
AUR62014837-RA	0h	24h	OK	12.2785	3.60123	-1.76957	-2.05424	0.00175	0.00991359	yes	coding	/
AUR62014851-RA	0h	24h	OK	32.6565	319.046	3.28832	3.94867	5e-05	0.000327342	yes	noncoding	LncRNA
AUR62014859-RA	0h	24h	OK	3.86971	8.81733	1.18812	1.68015	0.00475	0.0257387	yes	coding	/
AUR62014915-RA	0h	24h	OK	2.49112	7.65364	1.61935	2.00927	0.00125	0.00713476	yes	coding	/
AUR62015063-RA	0h	24h	OK	10.9312	29.8656	1.45004	2.90654	5e-05	0.000327342	yes	coding	/
AUR62015128-RA	0h	24h	OK	11.194	24.8168	1.14859	2.11963	0.0005	0.00290939	yes	coding	/
AUR62015177-RA	0h	24h	OK	18.4344	40.8118	1.14659	2.03036	0.00065	0.00376631	yes	coding	/
AUR62015211-RA	0h	24h	OK	15.1766	82.292	2.4389	4.84096	5e-05	0.000327342	yes	coding	/
AUR62015237-RA	0h	24h	OK	28.9586	9.8043	-1.56251	-2.81406	5e-05	0.000327342	yes	coding	/
AUR62015238-RA	0h	24h	OK	147.695	64.1534	-1.20302	-2.83157	5e-05	0.000327342	yes	coding	/
AUR62015276-RA	0h	24h	OK	26.0921	11.2083	-1.21905	-2.00238	0.0037	0.020223	yes	coding	/
AUR62015313-RA	0h	24h	OK	11.1446	4.15311	-1.42408	-1.6984	0.0077	0.0408202	yes	coding	/
AUR62015315-RA	0h	24h	OK	1103.32	429.073	-1.36256	-2.95285	5e-05	0.000327342	yes	coding	/
AUR62015363-RA	0h	24h	OK	10.5829	30.1612	1.51096	2.68692	5e-05	0.000327342	yes	coding	/
AUR62015421-RA	0h	24h	OK	6.12998	22.3074	1.86357	1.59701	0.0091	0.0478505	yes	coding	/
AUR62015429-RA	0h	24h	OK	400.577	170.067	-1.23598	-2.6959	5e-05	0.000327342	yes	coding	/
AUR62015468-RA	0h	24h	OK	27.3132	12.5401	-1.12305	-2.08991	0.0007	0.00404934	yes	coding	/
AUR62015499-RA	0h	24h	OK	63.6745	31.3995	-1.01997	-2.39509	5e-05	0.000327342	yes	coding	/
AUR62015526-RA	0h	24h	OK	15.7216	2.32919	-2.75485	-3.03419	0.0001	0.000607975	yes	coding	/
AUR62015541-RA	0h	24h	OK	27.7164	6.84565	-2.01748	-2.68645	0.0001	0.000607975	yes	coding	/
AUR62015572-RA	0h	24h	OK	573.382	154.969	-1.88752	-4.2624	5e-05	0.000327342	yes	coding	/
AUR62015580-RA	0h	24h	OK	80.1241	16.4086	-2.28779	-3.38828	5e-05	0.000327342	yes	coding	/
AUR62015594-RA	0h	24h	OK	61.2022	27.4603	-1.15624	-1.90383	0.00235	0.01321	yes	coding	/
AUR62015615-RA	0h	24h	OK	6.38474	0.874174	-2.86864	-2.46146	0.0011	0.00630043	yes	coding	/
AUR62015636-RA	0h	24h	OK	45.8347	15.2396	-1.58862	-2.27208	0.00065	0.00376631	yes	coding	/
AUR62015655-RA	0h	24h	OK	29.3739	63.874	1.12069	1.83214	0.0017	0.00963746	yes	coding	/
AUR62015664-RA	0h	24h	OK	64.8506	24.6071	-1.39804	-2.86021	5e-05	0.000327342	yes	coding	/
AUR62015777-RA	0h	24h	OK	67.6012	27.1047	-1.31851	-2.45227	5e-05	0.000327342	yes	coding	/
AUR62015786-RA	0h	24h	OK	3.09105	21.9469	2.82785	2.98443	0.00035	0.00204936	yes	coding	/
AUR62015838-RA	0h	24h	OK	11.6556	2.05753	-2.50204	-2.39453	0.00355	0.0194249	yes	coding	/
AUR62015845-RA	0h	24h	OK	3.18373	0	#NAME?	#NAME?	5e-05	0.000327342	yes	coding	/
AUR62015851-RA	0h	24h	OK	1.35652	0	#NAME?	#NAME?	0.0002	0.00118357	yes	coding	/
AUR62015869-RA	0h	24h	OK	1.96408	6.62366	1.75377	2.08338	0.00155	0.00880597	yes	coding	/
AUR62015873-RA	0h	24h	OK	20.1382	7.51441	-1.4222	-2.6148	0.0001	0.000607975	yes	coding	/
AUR62015897-RA	0h	24h	OK	20.7995	56.7693	1.44856	2.32607	0.0002	0.00118357	yes	coding	/
AUR62015925-RA	0h	24h	OK	36.8748	13.2927	-1.472	-3.41122	5e-05	0.000327342	yes	coding	/
AUR62015934-RA	0h	24h	OK	438.253	171.666	-1.35215	-3.18628	5e-05	0.000327342	yes	coding	/
AUR62015963-RA	0h	24h	OK	10.4729	3.29999	-1.66614	-1.94886	0.00405	0.022068	yes	coding	/
AUR62015971-RA	0h	24h	OK	8.9288	24.0844	1.43156	1.6004	0.0089	0.0468553	yes	coding	/
AUR62016004-RA	0h	24h	OK	4.20406	123.47	4.87624	3.97001	5e-05	0.000327342	yes	coding	/
AUR62016028-RA	0h	24h	OK	46.924	17.8298	-1.39604	-3.00441	5e-05	0.000327342	yes	coding	/
AUR62016038-RA	0h	24h	OK	7.66839	1.73314	-2.14553	-1.939	0.00625	0.0334721	yes	coding	/
AUR62016056-RA	0h	24h	OK	23.3897	10.1544	-1.20377	-1.92342	0.00205	0.0115672	yes	coding	/
AUR62016070-RA	0h	24h	OK	8.80672	27.263	1.63027	1.66931	0.00825	0.0436041	yes	coding	/
AUR62016081-RA	0h	24h	OK	82.3452	31.8689	-1.36953	-3.19126	5e-05	0.000327342	yes	coding	/
AUR62016096-RA	0h	24h	OK	7.61326	30.5461	2.0044	2.62659	5e-05	0.000327342	yes	coding	/
AUR62016098-RA	0h	24h	OK	0.340668	2.36497	2.79538	1.84215	0.0076	0.0403232	yes	coding	/
AUR62016100-RA	0h	24h	OK	493.858	1006.5	1.02718	2.45513	0.00015	0.000893574	yes	coding	/
AUR62016136-RA	0h	24h	OK	35.3873	9.9676	-1.82791	-3.04327	5e-05	0.000327342	yes	coding	/
AUR62016174-RA	0h	24h	OK	570.137	258.852	-1.13918	-2.7105	5e-05	0.000327342	yes	coding	/
AUR62016189-RA	0h	24h	OK	469.07	154.167	-1.60531	-3.73909	5e-05	0.000327342	yes	coding	/
AUR62016195-RA	0h	24h	OK	43.027	119.189	1.46994	3.34815	5e-05	0.000327342	yes	coding	/
AUR62016229-RA	0h	24h	OK	71.1408	31.3647	-1.18154	-2.39591	5e-05	0.000327342	yes	coding	/
AUR62016262-RA	0h	24h	OK	3.64182	0.445606	-3.03082	-2.2158	0.0076	0.0403232	yes	coding	/
AUR62016284-RA	0h	24h	OK	2.36091	0	#NAME?	#NAME?	5e-05	0.000327342	yes	coding	/
AUR62016312-RA	0h	24h	OK	11.255	2.02188	-2.4768	-2.2068	0.00775	0.0410637	yes	coding	/
AUR62016331-RA	0h	24h	OK	18.8283	7.56271	-1.31593	-2.82688	5e-05	0.000327342	yes	coding	/
AUR62016414-RA	0h	24h	OK	3.08881	9.36798	1.60069	2.92998	5e-05	0.000327342	yes	coding	/
AUR62016470-RA	0h	24h	OK	123.953	44.6313	-1.47367	-3.46638	5e-05	0.000327342	yes	coding	/
AUR62016491-RA	0h	24h	OK	2.6588	7.50615	1.4973	1.7692	0.00475	0.0257387	yes	coding	/
AUR62016494-RA	0h	24h	OK	10.2745	1.84922	-2.47407	-2.94684	0.0001	0.000607975	yes	coding	/
AUR62016520-RA	0h	24h	OK	52.9459	9.83554	-2.42844	-2.93415	0.00315	0.0175305	yes	coding	/
AUR62016534-RA	0h	24h	OK	10.7377	3.96304	-1.438	-1.57559	0.0076	0.0403232	yes	coding	/
AUR62016550-RA	0h	24h	OK	7.30114	1.44003	-2.34202	-1.75578	0.00895	0.0471063	yes	coding	/
AUR62016572-RA	0h	24h	OK	21.4882	6.34922	-1.75889	-2.40629	0.00015	0.000893574	yes	coding	/
AUR62016591-RA	0h	24h	OK	38.4486	5.67729	-2.75966	-3.4146	5e-05	0.000327342	yes	coding	/
AUR62016638-RA	0h	24h	OK	57.9238	16.9439	-1.77339	-3.80087	5e-05	0.000327342	yes	coding	/
AUR62016663-RA	0h	24h	OK	1.3155	5.43789	2.04744	2.37266	0.00075	0.00433205	yes	coding	/
AUR62016711-RA	0h	24h	OK	8.61219	2.15163	-2.00095	-2.20782	0.0007	0.00404934	yes	coding	/
AUR62016713-RA	0h	24h	OK	31.2821	2.55733	-3.61263	-3.46768	0.0001	0.000607975	yes	coding	/
AUR62016785-RA	0h	24h	OK	26.0213	1.36041	-4.25758	-3.94709	5e-05	0.000327342	yes	coding	/
AUR62016816-RA	0h	24h	OK	44.4842	18.8028	-1.24234	-2.03624	0.0011	0.00630043	yes	coding	/
AUR62016836-RA	0h	24h	OK	4.11653	36.561	3.1508	2.80877	0.0006	0.00348122	yes	coding	/
AUR62016887-RA	0h	24h	OK	14.0113	1.34416	-3.38181	-2.57142	0.0027	0.0151148	yes	coding	/
AUR62016898-RA	0h	24h	OK	15.4184	41.958	1.4443	2.36746	0.00035	0.00204936	yes	coding	/
AUR62016962-RA	0h	24h	OK	18.1106	6.20588	-1.54512	-2.40936	0.00035	0.00204936	yes	coding	/
AUR62016981-RA	0h	24h	OK	1.93859	65.3844	5.07586	3.22244	0.00755	0.040075	yes	coding	/
AUR62017003-RA	0h	24h	OK	187.379	20.7785	-3.17279	-5.71565	5e-05	0.000327342	yes	coding	/
AUR62017017-RA	0h	24h	OK	7.93257	2.25384	-1.8154	-3.04085	5e-05	0.000327342	yes	coding	/
AUR62017020-RA	0h	24h	OK	9.93076	2.65134	-1.90518	-1.9505	0.00905	0.0476015	yes	coding	/
AUR62017021-RA	0h	24h	OK	0.985957	24.0574	4.60881	3.40219	0.00075	0.00433205	yes	coding	/
AUR62017046-RA	0h	24h	OK	24.0695	161.16	2.74321	4.3471	5e-05	0.000327342	yes	noncoding	LncRNA
AUR62017080-RA	0h	24h	OK	88.604	25.8247	-1.77862	-3.59491	5e-05	0.000327342	yes	coding	/
AUR62017095-RA	0h	24h	OK	67.2134	251.263	1.90238	2.80615	5e-05	0.000327342	yes	coding	/
AUR62017125-RA	0h	24h	OK	2.90376	0	#NAME?	#NAME?	0.0014	0.00797175	yes	coding	/
AUR62017128-RA	0h	24h	OK	335.371	0	#NAME?	#NAME?	0.0006	0.00348122	yes	coding	/
AUR62017155-RA	0h	24h	OK	26.5403	9.92635	-1.41885	-2.06884	0.00125	0.00713476	yes	coding	/
AUR62017216-RA	0h	24h	OK	11.5651	1.5544	-2.89535	-2.63919	0.0005	0.00290939	yes	coding	/
AUR62017237-RA	0h	24h	OK	2.03942	0	#NAME?	#NAME?	5e-05	0.000327342	yes	coding	/
AUR62017273-RA	0h	24h	OK	15.6754	45.8868	1.54958	3.04475	5e-05	0.000327342	yes	coding	/
AUR62017279-RA	0h	24h	OK	13.6682	4.06061	-1.75106	-2.22511	0.0005	0.00290939	yes	coding	/
AUR62017312-RA	0h	24h	OK	228.361	86.304	-1.40382	-3.33219	5e-05	0.000327342	yes	coding	/
AUR62017384-RA	0h	24h	OK	7.56297	17.0026	1.16873	1.82058	0.00275	0.0153829	yes	coding	/
AUR62017390-RA	0h	24h	OK	17.8009	56.5756	1.66823	2.7548	5e-05	0.000327342	yes	coding	/
AUR62017445-RA	0h	24h	OK	3.01674	0	#NAME?	#NAME?	5e-05	0.000327342	yes	coding	/
AUR62017458-RA	0h	24h	OK	128.383	51.9402	-1.30554	-3.00482	5e-05	0.000327342	yes	coding	/
AUR62017594-RA	0h	24h	OK	11.9746	27.7282	1.21137	2.23184	0.0003	0.00176267	yes	coding	/
AUR62017605-RA	0h	24h	OK	4.83304	1.16456	-2.05315	-1.69843	0.00495	0.0267865	yes	coding	/
AUR62017639-RA	0h	24h	OK	3.91773	0	#NAME?	#NAME?	0.0002	0.00118357	yes	coding	/
AUR62017666-RA	0h	24h	OK	9.95106	28.1285	1.49911	2.05958	0.00115	0.00657841	yes	coding	/
AUR62017699-RA	0h	24h	OK	29.4976	10.9933	-1.42398	-2.00053	0.00455	0.0246898	yes	coding	/
AUR62017700-RA	0h	24h	OK	6.46105	15.6127	1.27288	1.75311	0.00535	0.0288484	yes	coding	/
AUR62017702-RA	0h	24h	OK	1.91378	6.85795	1.84135	2.13186	0.0011	0.00630043	yes	coding	/
AUR62017725-RA	0h	24h	OK	14.5992	5.03896	-1.53469	-1.96729	0.0023	0.0129366	yes	coding	/
AUR62017741-RA	0h	24h	OK	8.16724	30.3723	1.89484	1.8081	0.00885	0.0466073	yes	coding	/
AUR62017749-RA	0h	24h	OK	4.41454	56.4218	3.67592	4.24851	5e-05	0.000327342	yes	coding	/
AUR62017761-RA	0h	24h	OK	202.122	66.5063	-1.60366	-2.49763	0.0008	0.00461507	yes	coding	/
AUR62017791-RA	0h	24h	OK	7.87448	2.15957	-1.86644	-1.95711	0.0028	0.0156529	yes	coding	/
AUR62017792-RA	0h	24h	OK	13.7832	4.25845	-1.69451	-2.7014	5e-05	0.000327342	yes	coding	/
AUR62017849-RA	0h	24h	OK	11.997	3.36221	-1.83519	-1.77076	0.0087	0.0458743	yes	coding	/
AUR62017860-RA	0h	24h	OK	81.826	37.7529	-1.11597	-2.56181	5e-05	0.000327342	yes	coding	/
AUR62017895-RA	0h	24h	OK	0.202335	13.9722	6.10967	3.52	0.00605	0.0324419	yes	coding	/
AUR62017944-RA	0h	24h	OK	9.93536	4.52695	-1.13403	-1.8997	0.0028	0.0156529	yes	coding	/
AUR62017993-RA	0h	24h	OK	12.7405	4.04367	-1.65568	-2.20976	0.00075	0.00433205	yes	coding	/
AUR62017995-RA	0h	24h	OK	257.272	751.393	1.54627	3.11519	5e-05	0.000327342	yes	coding	/
AUR62018027-RA	0h	24h	OK	26.6129	13.2874	-1.00206	-1.82639	0.00215	0.0121157	yes	coding	/
AUR62018034-RA	0h	24h	OK	276.941	75.9339	-1.86676	-4.36413	5e-05	0.000327342	yes	coding	/
AUR62018071-RA	0h	24h	OK	69.7657	14.7428	-2.2425	-3.42462	5e-05	0.000327342	yes	coding	/
AUR62018075-RA	0h	24h	OK	11.3835	28.4289	1.32042	2.10541	0.00095	0.00545853	yes	coding	/
AUR62018163-RA	0h	24h	OK	12.6055	5.61314	-1.16718	-1.71703	0.005	0.027048	yes	coding	/
AUR62018170-RA	0h	24h	OK	2.33482	6.96287	1.57637	1.61374	0.00895	0.0471063	yes	coding	/
AUR62018191-RA	0h	24h	OK	254.339	76.3203	-1.73661	-3.87606	5e-05	0.000327342	yes	noncoding	LncRNA
AUR62018199-RA	0h	24h	OK	68.6495	13.7003	-2.32504	-3.98884	5e-05	0.000327342	yes	coding	/
AUR62018205-RA	0h	24h	OK	78.8204	28.6087	-1.46212	-3.09983	5e-05	0.000327342	yes	noncoding	LncRNA
AUR62018215-RA	0h	24h	OK	4.56146	26.6987	2.5492	3.38172	5e-05	0.000327342	yes	coding	/
AUR62018251-RA	0h	24h	OK	62.3973	17.711	-1.81684	-2.7581	0.0008	0.00461507	yes	coding	/
AUR62018300-RA	0h	24h	OK	1.44534	5.42139	1.90725	2.08751	0.0018	0.0101886	yes	coding	/
AUR62018487-RA	0h	24h	OK	3.93927	0.864705	-2.18765	-2.20769	0.0052	0.0280715	yes	coding	/
AUR62018515-RA	0h	24h	OK	23.8809	57.883	1.27728	2.78363	5e-05	0.000327342	yes	coding	/
AUR62018525-RA	0h	24h	OK	12.5926	0	#NAME?	#NAME?	5e-05	0.000327342	yes	coding	/
AUR62018526-RA	0h	24h	OK	38.242	6.59224	-2.53632	-3.71872	5e-05	0.000327342	yes	coding	/
AUR62018528-RA	0h	24h	OK	56.6829	19.3301	-1.55206	-2.71609	5e-05	0.000327342	yes	coding	/
AUR62018543-RA	0h	24h	OK	9.87004	38.0795	1.94789	3.64298	5e-05	0.000327342	yes	coding	/
AUR62018554-RA	0h	24h	OK	1327.22	647.037	-1.03648	-1.76522	0.00195	0.0110149	yes	coding	/
AUR62018558-RA	0h	24h	OK	47.5492	13.0521	-1.86514	-2.78504	5e-05	0.000327342	yes	coding	/
AUR62018568-RA	0h	24h	OK	36.8457	13.5837	-1.43962	-2.83303	5e-05	0.000327342	yes	coding	/
AUR62018572-RA	0h	24h	OK	245.702	64.7457	-1.92405	-4.3773	5e-05	0.000327342	yes	coding	/
AUR62018600-RA	0h	24h	OK	3.182	8.74737	1.45892	1.61031	0.00775	0.0410637	yes	coding	/
AUR62018601-RA	0h	24h	OK	7.48378	2.94716	-1.34444	-1.88047	0.00355	0.0194249	yes	coding	/
AUR62018609-RA	0h	24h	OK	16.7397	7.78776	-1.10399	-1.92345	0.00075	0.00433205	yes	coding	/
AUR62018634-RA	0h	24h	OK	5.78856	1.55944	-1.89217	-1.93213	0.00215	0.0121157	yes	coding	/
AUR62018656-RA	0h	24h	OK	15.8602	4.24925	-1.90013	-1.89801	0.00175	0.00991359	yes	coding	/
AUR62018696-RA	0h	24h	OK	9.98957	43.7884	2.13205	3.97552	5e-05	0.000327342	yes	coding	/
AUR62018734-RA	0h	24h	OK	7.34187	24.8229	1.75745	2.87015	5e-05	0.000327342	yes	coding	/
AUR62018787-RA	0h	24h	OK	98.7742	49.1897	-1.00578	-2.30127	0.0001	0.000607975	yes	coding	/
AUR62018793-RA	0h	24h	OK	371.978	158.561	-1.23018	-2.77436	5e-05	0.000327342	yes	coding	/
AUR62018803-RA	0h	24h	OK	4.52524	26.9845	2.57606	3.71139	5e-05	0.000327342	yes	coding	/
AUR62018881-RA	0h	24h	OK	11.1448	2.61409	-2.09199	-2.22583	0.0025	0.0140249	yes	coding	/
AUR62018886-RA	0h	24h	OK	127.008	46.6347	-1.44544	-2.77004	5e-05	0.000327342	yes	coding	/
AUR62018907-RA	0h	24h	OK	6.86742	21.7826	1.66534	2.1646	0.0012	0.00685616	yes	coding	/
AUR62018920-RA	0h	24h	OK	0.989817	7.45697	2.91336	1.80082	0.00665	0.0355094	yes	coding	/
AUR62018941-RA	0h	24h	OK	24.7183	7.14846	-1.78987	-2.58698	0.0002	0.00118357	yes	coding	/
AUR62018954-RA	0h	24h	OK	685.97	275.194	-1.31769	-3.02086	5e-05	0.000327342	yes	coding	/
AUR62018956-RA	0h	24h	OK	246.189	85.8463	-1.51994	-2.98134	5e-05	0.000327342	yes	coding	/
AUR62018959-RA	0h	24h	OK	220.836	86.2638	-1.35615	-3.14804	5e-05	0.000327342	yes	coding	/
AUR62019002-RA	0h	24h	OK	3.38657	10.9651	1.69502	1.74044	0.00665	0.0355094	yes	coding	/
AUR62019015-RA	0h	24h	OK	162.073	80.7323	-1.00543	-2.36257	0.00015	0.000893574	yes	coding	/
AUR62019045-RA	0h	24h	OK	20.162	8.44861	-1.25485	-1.96457	0.0021	0.011841	yes	coding	/
AUR62019063-RA	0h	24h	OK	275.498	77.0791	-1.83763	-4.32621	5e-05	0.000327342	yes	coding	/
AUR62019106-RA	0h	24h	OK	8.29318	3.59494	-1.20596	-1.66563	0.00795	0.0420764	yes	coding	/
AUR62019116-RA	0h	24h	OK	1147.51	500.844	-1.19607	-1.82463	0.00345	0.0188988	yes	coding	/
AUR62019153-RA	0h	24h	OK	250.946	75.8839	-1.72551	-3.88235	5e-05	0.000327342	yes	coding	/
AUR62019169-RA	0h	24h	OK	15.8302	4.65952	-1.76443	-3.31137	5e-05	0.000327342	yes	coding	/
AUR62019188-RA	0h	24h	OK	0.688852	5.02844	2.86784	1.72035	0.00745	0.0395651	yes	coding	/
AUR62019189-RA	0h	24h	OK	96.9428	35.9119	-1.43267	-3.315	5e-05	0.000327342	yes	coding	/
AUR62019209-RA	0h	24h	OK	39.6843	18.468	-1.10354	-1.7327	0.00455	0.0246898	yes	coding	/
AUR62019211-RA	0h	24h	OK	105.487	26.6293	-1.98598	-4.17056	5e-05	0.000327342	yes	coding	/
AUR62019297-RA	0h	24h	OK	14.4913	1.9065	-2.92619	-3.7031	5e-05	0.000327342	yes	coding	/
AUR62019305-RA	0h	24h	OK	23.2606	217.904	3.22774	2.6122	0.0019	0.0107415	yes	coding	/
AUR62019311-RA	0h	24h	OK	37.1014	16.6466	-1.15625	-2.60244	5e-05	0.000327342	yes	coding	/
AUR62019325-RA	0h	24h	OK	26.0497	6.84685	-1.92776	-3.09531	5e-05	0.000327342	yes	coding	/
AUR62019329-RA	0h	24h	OK	6.48586	14.6948	1.17994	1.97189	0.00055	0.00319537	yes	coding	/
AUR62019341-RA	0h	24h	OK	11.0583	2.82991	-1.96631	-1.83475	0.0053	0.0285903	yes	coding	/
AUR62019357-RA	0h	24h	OK	4.52424	12.1757	1.42825	1.72395	0.0052	0.0280715	yes	coding	/
AUR62019374-RA	0h	24h	OK	34.4462	0	#NAME?	#NAME?	0.00335	0.0183629	yes	noncoding	LncRNA
AUR62019418-RA	0h	24h	OK	1.70803	0	#NAME?	#NAME?	0.00105	0.00602046	yes	coding	/
AUR62019437-RA	0h	24h	OK	6.37974	18.028	1.49867	1.631	0.0068	0.0362719	yes	coding	/
AUR62019453-RA	0h	24h	OK	15.7503	36.6697	1.21921	1.82275	0.00395	0.0215376	yes	coding	/
AUR62019489-RA	0h	24h	OK	13.0108	5.8255	-1.15926	-1.78895	0.0031	0.0172594	yes	coding	/
AUR62019513-RA	0h	24h	OK	0.752793	3.78122	2.32853	2.16877	0.00285	0.0159247	yes	coding	/
AUR62019519-RA	0h	24h	OK	12.8676	36.5786	1.50725	1.87209	0.0013	0.00741411	yes	coding	/
AUR62019531-RA	0h	24h	OK	101.131	30.2636	-1.74058	-3.70289	5e-05	0.000327342	yes	coding	/
AUR62019540-RA	0h	24h	OK	269.77	81.6727	-1.72381	-4.12904	5e-05	0.000327342	yes	coding	/
AUR62019552-RA	0h	24h	OK	683.395	218.348	-1.64609	-3.77094	5e-05	0.000327342	yes	coding	/
AUR62019596-RA	0h	24h	OK	7.31758	1.53659	-2.25164	-2.37338	0.00275	0.0153829	yes	coding	/
AUR62019612-RA	0h	24h	OK	16.649	5.00201	-1.73485	-2.0978	0.0025	0.0140249	yes	coding	/
AUR62019614-RA	0h	24h	OK	8.62175	21.6187	1.32623	2.32258	0.00025	0.00147346	yes	coding	/
AUR62019615-RA	0h	24h	OK	24.8158	89.4197	1.84933	3.48472	5e-05	0.000327342	yes	coding	/
AUR62019653-RA	0h	24h	OK	18.5221	7.19814	-1.36355	-2.04003	0.0009	0.00517825	yes	coding	/
AUR62019697-RA	0h	24h	OK	6.62807	31.8438	2.26435	1.93566	0.0033	0.0181073	yes	coding	/
AUR62019741-RA	0h	24h	OK	109.073	42.1796	-1.37068	-3.22405	5e-05	0.000327342	yes	coding	/
AUR62019750-RA	0h	24h	OK	3.08092	9.87516	1.68044	1.71307	0.0066	0.0352646	yes	coding	/
AUR62019763-RA	0h	24h	OK	5.86247	24.6343	2.07109	2.48477	0.0003	0.00176267	yes	coding	/
AUR62019770-RA	0h	24h	OK	76.3729	32.9323	-1.21356	-2.61259	5e-05	0.000327342	yes	coding	/
AUR62019790-RA	0h	24h	OK	217.306	49.1166	-2.14545	-5.00536	5e-05	0.000327342	yes	coding	/
AUR62019796-RA	0h	24h	OK	9.54834	1.35109	-2.82113	-3.10384	0.0001	0.000607975	yes	coding	/
AUR62019798-RA	0h	24h	OK	6.39903	0	#NAME?	#NAME?	5e-05	0.000327342	yes	coding	/
AUR62019814-RA	0h	24h	OK	4.65415	101.797	4.45103	5.25646	5e-05	0.000327342	yes	coding	/
AUR62019821-RA	0h	24h	OK	365.502	1127.12	1.62469	3.59652	5e-05	0.000327342	yes	noncoding	LncRNA
AUR62019831-RA	0h	24h	OK	95.0438	36.7885	-1.36934	-3.03944	5e-05	0.000327342	yes	coding	/
AUR62019845-RA	0h	24h	OK	129.327	54.776	-1.2394	-2.73133	5e-05	0.000327342	yes	coding	/
AUR62019883-RA	0h	24h	OK	36.4523	13.5483	-1.4279	-3.12812	5e-05	0.000327342	yes	coding	/
AUR62019904-RA	0h	24h	OK	101.063	13.3647	-2.91875	-3.04266	0.00485	0.0262647	yes	coding	/
AUR62019905-RA	0h	24h	OK	17.756	4.46439	-1.99177	-1.76531	0.00805	0.0425875	yes	coding	/
AUR62019931-RA	0h	24h	OK	7.47465	111.543	3.89945	5.30004	5e-05	0.000327342	yes	coding	/
AUR62019941-RA	0h	24h	OK	1.83439	5.81846	1.66534	2.12394	0.00075	0.00433205	yes	coding	/
AUR62019949-RA	0h	24h	OK	8.30796	30.5496	1.87859	2.22108	0.0002	0.00118357	yes	coding	/
AUR62019958-RA	0h	24h	OK	865.665	121.98	-2.82717	-6.0689	5e-05	0.000327342	yes	coding	/
AUR62019992-RA	0h	24h	OK	23.8381	9.50046	-1.3272	-2.2769	0.00025	0.00147346	yes	coding	/
AUR62020006-RA	0h	24h	OK	1.8466	7.8103	2.08051	1.9061	0.008	0.0423299	yes	coding	/
AUR62020008-RA	0h	24h	OK	14.433	62.1658	2.10675	3.83199	5e-05	0.000327342	yes	coding	/
AUR62020051-RA	0h	24h	OK	19.6439	7.16506	-1.45503	-2.04959	0.00315	0.0175305	yes	coding	/
AUR62020056-RA	0h	24h	OK	15.8764	6.4653	-1.29609	-2.08904	0.001	0.00573806	yes	coding	/
AUR62020068-RA	0h	24h	OK	190.61	42.1875	-2.17573	-5.01668	5e-05	0.000327342	yes	coding	/
AUR62020074-RA	0h	24h	OK	72.3976	14.36	-2.33388	-4.20154	5e-05	0.000327342	yes	coding	/
AUR62020080-RA	0h	24h	OK	12.8151	140.667	3.45637	5.03953	5e-05	0.000327342	yes	coding	/
AUR62020103-RA	0h	24h	OK	84.7396	31.3138	-1.43624	-2.81285	5e-05	0.000327342	yes	coding	/
AUR62020111-RA	0h	24h	OK	1.56888	15.9494	3.3457	3.6303	5e-05	0.000327342	yes	coding	/
AUR62020144-RA	0h	24h	OK	25.9752	10.8271	-1.26249	-1.98872	0.00135	0.00769465	yes	coding	/
AUR62020152-RA	0h	24h	OK	0.293977	2.57838	3.13269	1.84183	0.00565	0.0303757	yes	coding	/
AUR62020167-RA	0h	24h	OK	1272.19	371.303	-1.77665	-4.22224	5e-05	0.000327342	yes	noncoding	LncRNA
AUR62020187-RA	0h	24h	OK	10.496	72.5134	2.78841	4.10178	5e-05	0.000327342	yes	coding	/
AUR62020272-RA	0h	24h	OK	95.4794	41.807	-1.19145	-2.73756	5e-05	0.000327342	yes	coding	/
AUR62020288-RA	0h	24h	OK	177.667	82.7759	-1.10189	-1.56678	0.00715	0.0380583	yes	coding	/
AUR62020326-RA	0h	24h	OK	40.1532	81.2946	1.01765	1.89982	0.0012	0.00685616	yes	coding	/
AUR62020350-RA	0h	24h	OK	31.5471	8.11236	-1.95931	-3.66525	5e-05	0.000327342	yes	coding	/
AUR62020382-RA	0h	24h	OK	8.27328	2.42665	-1.76949	-1.92227	0.00355	0.0194249	yes	coding	/
AUR62020383-RA	0h	24h	OK	51.4577	16.7581	-1.61853	-3.56984	5e-05	0.000327342	yes	coding	/
AUR62020429-RA	0h	24h	OK	10.1334	29.234	1.52853	2.82382	5e-05	0.000327342	yes	coding	/
AUR62020494-RA	0h	24h	OK	126.024	32.1264	-1.97187	-2.26967	0.00075	0.00433205	yes	coding	/
AUR62020528-RA	0h	24h	OK	1.9787	0	#NAME?	#NAME?	0.0001	0.000607975	yes	coding	/
AUR62020529-RA	0h	24h	OK	4.59911	40.4827	3.13788	3.8267	5e-05	0.000327342	yes	coding	/
AUR62020532-RA	0h	24h	OK	62.284	21.0415	-1.56563	-1.7175	0.00535	0.0288484	yes	coding	/
AUR62020545-RA	0h	24h	OK	790.714	361.56	-1.12892	-2.03664	0.0006	0.00348122	yes	noncoding	LncRNA
AUR62020570-RA	0h	24h	OK	30.3752	191.422	2.65579	3.50306	5e-05	0.000327342	yes	coding	/
AUR62020585-RA	0h	24h	OK	33.0303	12.2179	-1.43479	-2.03358	0.0038	0.0207464	yes	coding	/
AUR62020589-RA	0h	24h	OK	29.0992	10.3071	-1.49735	-2.08714	0.00095	0.00545853	yes	coding	/
AUR62020594-RA	0h	24h	OK	16.0502	77.6295	2.27401	4.24358	5e-05	0.000327342	yes	coding	/
AUR62020608-RA	0h	24h	OK	47.4246	22.984	-1.045	-2.19671	0.00025	0.00147346	yes	coding	/
AUR62020618-RA	0h	24h	OK	76.6613	14.9018	-2.36301	-4.86175	5e-05	0.000327342	yes	coding	/
AUR62020648-RA	0h	24h	OK	5.57658	13.0032	1.22142	1.53275	0.0091	0.0478505	yes	coding	/
AUR62020690-RA	0h	24h	OK	14.7234	29.6327	1.00908	2.10568	0.00025	0.00147346	yes	coding	/
AUR62020703-RA	0h	24h	OK	33.0084	5.94583	-2.47288	-2.70159	0.00045	0.00262489	yes	coding	/
AUR62020755-RA	0h	24h	OK	31.065	12.4366	-1.3207	-2.13957	0.00035	0.00204936	yes	coding	/
AUR62020759-RA	0h	24h	OK	10.6296	3.30743	-1.68431	-1.81223	0.0045	0.0244308	yes	coding	/
AUR62020775-RA	0h	24h	OK	190.671	79.647	-1.25939	-2.81505	5e-05	0.000327342	yes	noncoding	LncRNA
AUR62020786-RA	0h	24h	OK	1.9087	7.10986	1.89723	1.94666	0.0054	0.0290821	yes	coding	/
AUR62020835-RA	0h	24h	OK	10.2893	4.73646	-1.11926	-1.7232	0.0035	0.019163	yes	coding	/
AUR62020844-RA	0h	24h	OK	309.412	98.9297	-1.64505	-3.84257	5e-05	0.000327342	yes	coding	/
AUR62020845-RA	0h	24h	OK	56.6269	23.2878	-1.28191	-2.1032	0.00085	0.00489598	yes	coding	/
AUR62020850-RA	0h	24h	OK	37.7181	9.55191	-1.9814	-3.23371	5e-05	0.000327342	yes	coding	/
AUR62020865-RA	0h	24h	OK	1036.82	440.483	-1.235	-2.5258	0.0001	0.000607975	yes	coding	/
AUR62020875-RA	0h	24h	OK	5.80437	14.5134	1.32217	1.76866	0.00495	0.0267865	yes	coding	/
AUR62020889-RA	0h	24h	OK	36.3404	4.29481	-3.08091	-2.70241	5e-05	0.000327342	yes	coding	/
AUR62020906-RA	0h	24h	OK	16.6063	5.79944	-1.51775	-1.96105	0.00335	0.0183629	yes	coding	/
AUR62020969-RA	0h	24h	OK	6.26785	70.2927	3.48733	3.58428	5e-05	0.000327342	yes	coding	/
AUR62020970-RA	0h	24h	OK	3.8609	12.4556	1.68979	1.64675	0.007	0.0373005	yes	coding	/
AUR62021050-RA	0h	24h	OK	572.504	211.399	-1.43732	-3.09078	5e-05	0.000327342	yes	coding	/
AUR62021070-RA	0h	24h	OK	115.068	30.0385	-1.9376	-2.46458	0.001	0.00573806	yes	coding	/
AUR62021079-RA	0h	24h	OK	41.5719	7.02571	-2.56489	-3.71445	5e-05	0.000327342	yes	coding	/
AUR62021082-RA	0h	24h	OK	75.4826	24.4126	-1.62852	-3.4418	5e-05	0.000327342	yes	coding	/
AUR62021095-RA	0h	24h	OK	86.5266	42.2213	-1.03517	-2.03157	0.00135	0.00769465	yes	coding	/
AUR62021096-RA	0h	24h	OK	25.1288	4.17622	-2.58907	-3.46018	5e-05	0.000327342	yes	coding	/
AUR62021118-RA	0h	24h	OK	117.73	267.623	1.18473	2.67455	5e-05	0.000327342	yes	coding	/
AUR62021161-RA	0h	24h	OK	6.98822	2.73219	-1.35487	-1.72901	0.0093	0.0488576	yes	coding	/
AUR62021165-RA	0h	24h	OK	538.749	244.357	-1.14062	-2.69602	5e-05	0.000327342	yes	coding	/
AUR62021174-RA	0h	24h	OK	4.15713	32.656	2.97369	2.83121	0.0004	0.00233755	yes	coding	/
AUR62021176-RA	0h	24h	OK	13.3225	38.598	1.53466	3.19807	5e-05	0.000327342	yes	coding	/
AUR62021194-RA	0h	24h	OK	2.72326	9.83836	1.85308	3.13222	5e-05	0.000327342	yes	coding	/
AUR62021196-RA	0h	24h	OK	11.9362	164.974	3.78882	6.5471	5e-05	0.000327342	yes	coding	/
AUR62021236-RA	0h	24h	OK	87.3251	35.3847	-1.30327	-3.03321	5e-05	0.000327342	yes	coding	/
AUR62021251-RA	0h	24h	OK	0.99921	10.771	3.43022	2.46405	0.0041	0.0223336	yes	coding	/
AUR62021273-RA	0h	24h	OK	39.192	8.13665	-2.26805	-3.02564	5e-05	0.000327342	yes	coding	/
AUR62021318-RA	0h	24h	OK	7.41281	0.585042	-3.66341	-3.13818	0.00025	0.00147346	yes	coding	/
AUR62021346-RA	0h	24h	OK	464.292	177.924	-1.38377	-3.19487	5e-05	0.000327342	yes	coding	/
AUR62021356-RA	0h	24h	OK	4.97949	10.1042	1.02089	1.58366	0.00655	0.0350078	yes	coding	/
AUR62021363-RA	0h	24h	OK	90.1398	33.0992	-1.44537	-3.41393	5e-05	0.000327342	yes	coding	/
AUR62021382-RA	0h	24h	OK	12.5374	32.8449	1.38943	2.38148	0.0002	0.00118357	yes	coding	/
AUR62021414-RA	0h	24h	OK	8.60967	32.1302	1.8999	2.22557	0.00155	0.00880597	yes	coding	/
AUR62021443-RA	0h	24h	OK	7.75523	17.8753	1.20473	2.268	0.00025	0.00147346	yes	coding	/
AUR62021457-RA	0h	24h	OK	3.61732	7.42051	1.0366	1.61452	0.0074	0.0393112	yes	coding	/
AUR62021465-RA	0h	24h	OK	15.1834	4.0324	-1.91278	-2.25651	0.0014	0.00797175	yes	coding	/
AUR62021492-RA	0h	24h	OK	8.124	0.900212	-3.17385	-3.41284	5e-05	0.000327342	yes	coding	/
AUR62021494-RA	0h	24h	OK	1.18601	6.50066	2.45447	2.2292	0.00365	0.0199551	yes	coding	/
AUR62021507-RA	0h	24h	OK	18.3921	82.2308	2.1606	4.16426	5e-05	0.000327342	yes	coding	/
AUR62021526-RA	0h	24h	OK	19.6913	5.44953	-1.85335	-3.52047	5e-05	0.000327342	yes	coding	/
AUR62021554-RA	0h	24h	OK	9.9345	1.11279	-3.15827	-3.11813	0.00015	0.000893574	yes	coding	/
AUR62021652-RA	0h	24h	OK	11.8101	67.0615	2.50547	4.18949	5e-05	0.000327342	yes	coding	/
AUR62021662-RA	0h	24h	OK	17.0218	88.5818	2.37962	3.87068	5e-05	0.000327342	yes	coding	/
AUR62021677-RA	0h	24h	OK	16.8284	5.74898	-1.54952	-2.74425	5e-05	0.000327342	yes	coding	/
AUR62021685-RA	0h	24h	OK	554.84	215.783	-1.36249	-3.01215	5e-05	0.000327342	yes	noncoding	LncRNA
AUR62021687-RA	0h	24h	OK	10.017	60.8661	2.60318	4.07577	5e-05	0.000327342	yes	coding	/
AUR62021717-RA	0h	24h	OK	108.579	25.6768	-2.08021	-2.8091	5e-05	0.000327342	yes	coding	/
AUR62021752-RA	0h	24h	OK	14.792	30.9405	1.06467	2.14359	0.00045	0.00262489	yes	coding	/
AUR62021766-RA	0h	24h	OK	79.6519	21.0609	-1.91914	-2.34206	0.00065	0.00376631	yes	coding	/
AUR62021829-RA	0h	24h	OK	7.14951	15.6506	1.1303	1.57016	0.00745	0.0395651	yes	coding	/
AUR62021863-RA	0h	24h	OK	20.1091	5.52252	-1.86445	-2.80317	5e-05	0.000327342	yes	coding	/
AUR62021892-RA	0h	24h	OK	29.9737	81.9684	1.45137	3.16584	5e-05	0.000327342	yes	coding	/
AUR62021910-RA	0h	24h	OK	1052.21	483.874	-1.12072	-2.23437	0.00025	0.00147346	yes	coding	/
AUR62021926-RA	0h	24h	OK	77.3333	30.2137	-1.35589	-3.08546	5e-05	0.000327342	yes	coding	/
AUR62021947-RA	0h	24h	OK	1.99069	0	#NAME?	#NAME?	5e-05	0.000327342	yes	coding	/
AUR62021977-RA	0h	24h	OK	18.3769	3.02815	-2.60139	-2.92554	5e-05	0.000327342	yes	coding	/
AUR62021995-RA	0h	24h	OK	7.8009	19.5322	1.32414	2.12009	0.00035	0.00204936	yes	coding	/
AUR62022002-RA	0h	24h	OK	78.2599	13.3912	-2.54699	-4.69776	5e-05	0.000327342	yes	coding	/
AUR62022056-RA	0h	24h	OK	141.414	63.7661	-1.14906	-2.56527	5e-05	0.000327342	yes	coding	/
AUR62022072-RA	0h	24h	OK	19.5377	49.8762	1.35209	2.59573	5e-05	0.000327342	yes	coding	/
AUR62022119-RA	0h	24h	OK	27.0521	3.96126	-2.77171	-4.06729	5e-05	0.000327342	yes	coding	/
AUR62022132-RA	0h	24h	OK	19.9535	62.7272	1.65245	3.44696	5e-05	0.000327342	yes	coding	/
AUR62022133-RA	0h	24h	OK	20.145	7.40937	-1.443	-1.94755	0.00155	0.00880597	yes	coding	/
AUR62022150-RA	0h	24h	OK	10.0812	3.17875	-1.66513	-1.8707	0.0058	0.0311469	yes	coding	/
AUR62022159-RA	0h	24h	OK	194.136	92.3499	-1.07188	-1.91356	0.00095	0.00545853	yes	coding	/
AUR62022182-RA	0h	24h	OK	15.7564	5.03951	-1.64458	-2.29414	0.00025	0.00147346	yes	coding	/
AUR62022211-RA	0h	24h	OK	4.22076	12.0487	1.51331	1.75766	0.0069	0.0367907	yes	coding	/
AUR62022232-RA	0h	24h	OK	19.5412	8.33823	-1.2287	-1.93749	0.00205	0.0115672	yes	coding	/
AUR62022299-RA	0h	24h	OK	14.1154	32.1946	1.18954	1.75105	0.00425	0.0231171	yes	coding	/
AUR62022327-RA	0h	24h	OK	6.60679	16.2858	1.30159	2.12835	0.00065	0.00376631	yes	coding	/
AUR62022345-RA	0h	24h	OK	8.76914	2.31283	-1.92278	-2.02098	0.0015	0.00852791	yes	coding	/
AUR62022355-RA	0h	24h	OK	134.15	21.8735	-2.61659	-3.04185	5e-05	0.000327342	yes	coding	/
AUR62022407-RA	0h	24h	OK	51.8172	9.77614	-2.40609	-4.49901	5e-05	0.000327342	yes	coding	/
AUR62022459-RA	0h	24h	OK	3.70447	0	#NAME?	#NAME?	0.0045	0.0244308	yes	coding	/
AUR62022488-RA	0h	24h	OK	75.661	16.1564	-2.22745	-4.68814	5e-05	0.000327342	yes	coding	/
AUR62022534-RA	0h	24h	OK	42.2098	14.4258	-1.54893	-1.48125	0.00945	0.0496117	yes	coding	/
AUR62022547-RA	0h	24h	OK	13.0052	3.85237	-1.75527	-2.74593	5e-05	0.000327342	yes	coding	/
AUR62022581-RA	0h	24h	OK	28.5962	62.6803	1.13219	2.43433	0.0001	0.000607975	yes	coding	/
AUR62022586-RA	0h	24h	OK	27.3844	94.6677	1.78952	2.01773	0.00055	0.00319537	yes	coding	/
AUR62022611-RA	0h	24h	OK	12.1244	4.80489	-1.33534	-1.83491	0.00635	0.0339884	yes	coding	/
AUR62022614-RA	0h	24h	OK	14.5947	282.157	4.27298	6.96259	5e-05	0.000327342	yes	coding	/
AUR62022637-RA	0h	24h	OK	3.56876	12.3621	1.79243	2.92907	5e-05	0.000327342	yes	coding	/
AUR62022681-RA	0h	24h	OK	95.3141	295.926	1.63448	3.91552	5e-05	0.000327342	yes	coding	/
AUR62022699-RA	0h	24h	OK	25.8805	6.7274	-1.94374	-3.14294	5e-05	0.000327342	yes	coding	/
AUR62022715-RA	0h	24h	OK	6.01124	99.04	4.04228	5.68681	5e-05	0.000327342	yes	coding	/
AUR62022733-RA	0h	24h	OK	10.6926	0	#NAME?	#NAME?	5e-05	0.000327342	yes	coding	/
AUR62022769-RA	0h	24h	OK	7.99239	1.9277	-2.05174	-2.60051	0.0002	0.00118357	yes	coding	/
AUR62022781-RA	0h	24h	OK	11.1001	5.29785	-1.06709	-1.76678	0.00375	0.0204838	yes	coding	/
AUR62022801-RA	0h	24h	OK	48.5124	116.1	1.25894	1.97688	0.0024	0.0134817	yes	coding	/
AUR62022802-RA	0h	24h	OK	7.17676	1.51181	-2.24706	-2.06977	0.00515	0.0278137	yes	coding	/
AUR62022824-RA	0h	24h	OK	141.414	48.724	-1.53722	-3.41955	5e-05	0.000327342	yes	noncoding	LncRNA
AUR62022838-RA	0h	24h	OK	22.4122	9.27082	-1.27352	-1.93059	0.0039	0.0212736	yes	coding	/
AUR62022855-RA	0h	24h	OK	11.6393	3.54751	-1.71413	-2.21375	0.0014	0.00797175	yes	coding	/
AUR62022865-RA	0h	24h	OK	55.2078	187.137	1.76115	4.04047	5e-05	0.000327342	yes	coding	/
AUR62022895-RA	0h	24h	OK	23.1108	8.28228	-1.48047	-2.91952	5e-05	0.000327342	yes	coding	/
AUR62022899-RA	0h	24h	OK	21.7798	6.26175	-1.79835	-2.15585	0.0056	0.030117	yes	coding	/
AUR62022910-RA	0h	24h	OK	1.33445	0	#NAME?	#NAME?	5e-05	0.000327342	yes	coding	/
AUR62022947-RA	0h	24h	OK	3.40963	0.8061	-2.08058	-1.73224	0.00445	0.0241683	yes	coding	/
AUR62022954-RA	0h	24h	OK	19.4987	41.4838	1.08917	2.32171	5e-05	0.000327342	yes	coding	/
AUR62022984-RA	0h	24h	OK	6.38287	14.3692	1.17071	1.72959	0.0024	0.0134817	yes	coding	/
AUR62022987-RA	0h	24h	OK	35.5404	291.387	3.0354	6.4594	5e-05	0.000327342	yes	coding	/
AUR62022989-RA	0h	24h	OK	16.4829	43.3329	1.39449	2.66702	5e-05	0.000327342	yes	coding	/
AUR62022994-RA	0h	24h	OK	7.70188	45.9433	2.57657	3.45732	5e-05	0.000327342	yes	coding	/
AUR62023000-RA	0h	24h	OK	8.0442	0	#NAME?	#NAME?	5e-05	0.000327342	yes	coding	/
AUR62023009-RA	0h	24h	OK	82.1568	10.5492	-2.96125	-3.64822	5e-05	0.000327342	yes	coding	/
AUR62023010-RA	0h	24h	OK	84.2308	19.8266	-2.08691	-3.54485	5e-05	0.000327342	yes	coding	/
AUR62023021-RA	0h	24h	OK	1.2056	0	#NAME?	#NAME?	5e-05	0.000327342	yes	coding	/
AUR62023037-RA	0h	24h	OK	61.2454	10.6921	-2.51805	-2.95211	0.0002	0.00118357	yes	coding	/
AUR62023081-RA	0h	24h	OK	57.0906	15.8714	-1.84682	-3.05571	5e-05	0.000327342	yes	coding	/
AUR62023157-RA	0h	24h	OK	17.2579	50.399	1.54614	2.75487	5e-05	0.000327342	yes	coding	/
AUR62023177-RA	0h	24h	OK	8.72266	18.3099	1.06979	1.55591	0.0068	0.0362719	yes	coding	/
AUR62023209-RA	0h	24h	OK	0.391733	2.59986	2.73049	1.65552	0.0089	0.0468553	yes	coding	/
AUR62023216-RA	0h	24h	OK	22.804	9.77231	-1.22251	-2.31777	0.00015	0.000893574	yes	coding	/
AUR62023233-RA	0h	24h	OK	14.0992	33.851	1.26359	2.49335	5e-05	0.000327342	yes	coding	/
AUR62023236-RA	0h	24h	OK	2.30626	0	#NAME?	#NAME?	5e-05	0.000327342	yes	coding	/
AUR62023299-RA	0h	24h	OK	906.698	320.118	-1.50202	-3.2584	5e-05	0.000327342	yes	coding	/
AUR62023325-RA	0h	24h	OK	11.2044	39.6872	1.82461	3.59834	5e-05	0.000327342	yes	coding	/
AUR62023326-RA	0h	24h	OK	186.911	65.8126	-1.50592	-3.59432	5e-05	0.000327342	yes	coding	/
AUR62023365-RA	0h	24h	OK	153.037	64.9169	-1.23721	-2.58426	5e-05	0.000327342	yes	coding	/
AUR62023368-RA	0h	24h	OK	40.0311	18.3053	-1.12886	-1.48535	0.00915	0.0481009	yes	coding	/
AUR62023372-RA	0h	24h	OK	72.2742	20.0553	-1.8495	-2.98779	5e-05	0.000327342	yes	coding	/
AUR62023373-RA	0h	24h	OK	35.4673	7.04437	-2.33195	-2.55135	0.00085	0.00489598	yes	coding	/
AUR62023374-RA	0h	24h	OK	73.9026	169.253	1.19548	2.4761	5e-05	0.000327342	yes	noncoding	LncRNA
AUR62023380-RA	0h	24h	OK	801.406	263.94	-1.60232	-3.59698	5e-05	0.000327342	yes	coding	/
AUR62023381-RA	0h	24h	OK	938.014	411.79	-1.1877	-2.79604	5e-05	0.000327342	yes	noncoding	LncRNA
AUR62023396-RA	0h	24h	OK	912.427	438.077	-1.05852	-2.47043	5e-05	0.000327342	yes	coding	/
AUR62023452-RA	0h	24h	OK	36.535	13.5627	-1.42964	-2.88092	5e-05	0.000327342	yes	coding	/
AUR62023468-RA	0h	24h	OK	47.0759	96.8728	1.0411	2.42669	0.00015	0.000893574	yes	coding	/
AUR62023484-RA	0h	24h	OK	24.2231	10.925	-1.14876	-2.06995	0.00125	0.00713476	yes	coding	/
AUR62023502-RA	0h	24h	OK	229.695	111.535	-1.04222	-2.45341	5e-05	0.000327342	yes	coding	/
AUR62023518-RA	0h	24h	OK	13.7494	6.59534	-1.05985	-1.71562	0.00535	0.0288484	yes	coding	/
AUR62023520-RA	0h	24h	OK	6.66539	1.03011	-2.69389	-1.78354	0.0053	0.0285903	yes	coding	/
AUR62023525-RA	0h	24h	OK	42.6436	5.51551	-2.95076	-4.5463	5e-05	0.000327342	yes	coding	/
AUR62023540-RA	0h	24h	OK	121.35	42.1799	-1.52455	-3.46917	5e-05	0.000327342	yes	coding	/
AUR62023546-RA	0h	24h	OK	19.5522	115.489	2.56236	5.40652	5e-05	0.000327342	yes	coding	/
AUR62023575-RA	0h	24h	OK	40.7056	9.13629	-2.15555	-3.72475	5e-05	0.000327342	yes	coding	/
AUR62023621-RA	0h	24h	OK	3.77839	19.2591	2.34969	2.9822	5e-05	0.000327342	yes	coding	/
AUR62023677-RA	0h	24h	OK	55.0635	8.07158	-2.77017	-3.56838	0.0002	0.00118357	yes	coding	/
AUR62023682-RA	0h	24h	OK	90.2581	37.7482	-1.25765	-3.01043	5e-05	0.000327342	yes	coding	/
AUR62023727-RA	0h	24h	OK	19.7499	8.09262	-1.28717	-1.9149	0.0024	0.0134817	yes	coding	/
AUR62023781-RA	0h	24h	OK	33.3933	10.1321	-1.72062	-3.24523	5e-05	0.000327342	yes	coding	/
AUR62023794-RA	0h	24h	OK	27.8666	57.2618	1.03904	1.6874	0.00375	0.0204838	yes	coding	/
AUR62023799-RA	0h	24h	OK	33.1116	16.2582	-1.02617	-1.7036	0.0038	0.0207464	yes	noncoding	LncRNA
AUR62023800-RA	0h	24h	OK	27.2501	11.1541	-1.28868	-2.04933	0.0022	0.0123893	yes	coding	/
AUR62023801-RA	0h	24h	OK	7.56151	18.1856	1.26605	1.86864	0.0029	0.0161962	yes	coding	/
AUR62023809-RA	0h	24h	OK	25.898	365.828	3.82026	7.52657	5e-05	0.000327342	yes	coding	/
AUR62023862-RA	0h	24h	OK	237.278	117.201	-1.0176	-2.45909	5e-05	0.000327342	yes	coding	/
AUR62023869-RA	0h	24h	OK	19.4961	170.041	3.12462	5.71708	5e-05	0.000327342	yes	coding	/
AUR62023921-RA	0h	24h	OK	18.8585	170.7	3.17818	6.5094	5e-05	0.000327342	yes	coding	/
AUR62023942-RA	0h	24h	OK	4.03009	23.9913	2.57363	2.79815	0.0003	0.00176267	yes	coding	/
AUR62023949-RA	0h	24h	OK	35.3456	15.1069	-1.22633	-2.23615	0.0005	0.00290939	yes	coding	/
AUR62023966-RA	0h	24h	OK	82.9466	20.4905	-2.01722	-2.52991	0.00015	0.000893574	yes	coding	/
AUR62023969-RA	0h	24h	OK	16.5508	62.7981	1.92382	3.74384	5e-05	0.000327342	yes	coding	/
AUR62023973-RA	0h	24h	OK	246.495	87.3219	-1.49714	-3.49182	5e-05	0.000327342	yes	coding	/
AUR62024000-RA	0h	24h	OK	7.73778	1.6875	-2.19703	-2.25418	0.00115	0.00657841	yes	coding	/
AUR62024021-RA	0h	24h	OK	27.5371	5.65159	-2.28465	-1.99127	0.0084	0.0443504	yes	coding	/
AUR62024048-RA	0h	24h	OK	660.181	194.967	-1.75963	-4.09299	5e-05	0.000327342	yes	coding	/
AUR62024104-RA	0h	24h	OK	14.1158	6.34581	-1.15344	-2.11937	0.0007	0.00404934	yes	coding	/
AUR62024114-RA	0h	24h	OK	19.2619	2.39863	-3.00546	-3.64039	5e-05	0.000327342	yes	coding	/
AUR62024119-RA	0h	24h	OK	18.6853	37.5616	1.00736	1.90685	0.0012	0.00685616	yes	coding	/
AUR62024168-RA	0h	24h	OK	14.134	66.1694	2.227	4.1049	5e-05	0.000327342	yes	coding	/
AUR62024187-RA	0h	24h	OK	3.19459	12.514	1.96984	1.99799	0.0014	0.00797175	yes	coding	/
AUR62024209-RA	0h	24h	OK	16.6394	7.11568	-1.22553	-1.80911	0.0026	0.0145707	yes	coding	/
AUR62024303-RA	0h	24h	OK	18.0659	4.83736	-1.90098	-2.59982	0.00015	0.000893574	yes	coding	/
AUR62024308-RA	0h	24h	OK	80.7252	339.918	2.0741	4.48286	5e-05	0.000327342	yes	coding	/
AUR62024337-RA	0h	24h	OK	402.578	144.047	-1.48273	-3.48776	5e-05	0.000327342	yes	coding	/
AUR62024345-RA	0h	24h	OK	4.04551	0	#NAME?	#NAME?	5e-05	0.000327342	yes	coding	/
AUR62024367-RA	0h	24h	OK	5.23447	1.14921	-2.1874	-1.93346	0.0092	0.0483574	yes	coding	/
AUR62024381-RA	0h	24h	OK	5.07534	1.54408	-1.71675	-2.03961	0.00265	0.0148421	yes	coding	/
AUR62024407-RA	0h	24h	OK	27.2537	7.06979	-1.94672	-2.12154	0.00845	0.0445983	yes	coding	/
AUR62024429-RA	0h	24h	OK	1.86525	6.84823	1.87636	2.42427	0.00015	0.000893574	yes	coding	/
AUR62024431-RA	0h	24h	OK	41.1452	10.4307	-1.97989	-4.44007	5e-05	0.000327342	yes	coding	/
AUR62024433-RA	0h	24h	OK	741.751	270.145	-1.4572	-3.28213	5e-05	0.000327342	yes	coding	/
AUR62024440-RA	0h	24h	OK	66.3514	9.84554	-2.75258	-2.91029	0.0035	0.019163	yes	coding	/
AUR62024441-RA	0h	24h	OK	43.575	3.00512	-3.858	-4.35177	5e-05	0.000327342	yes	coding	/
AUR62024443-RA	0h	24h	OK	67.8058	8.01977	-3.07978	-4.89798	5e-05	0.000327342	yes	coding	/
AUR62024446-RA	0h	24h	OK	7.63356	2.72434	-1.48645	-2.12453	0.0012	0.00685616	yes	coding	/
AUR62024463-RA	0h	24h	OK	355.75	102.443	-1.79605	-4.15572	5e-05	0.000327342	yes	noncoding	LncRNA
AUR62024516-RA	0h	24h	OK	109.069	22.0549	-2.30607	-4.30008	5e-05	0.000327342	yes	noncoding	LncRNA
AUR62024529-RA	0h	24h	OK	18.1888	5.14367	-1.82218	-2.49069	0.00035	0.00204936	yes	coding	/
AUR62024594-RA	0h	24h	OK	254.648	48.5288	-2.39159	-5.3431	5e-05	0.000327342	yes	coding	/
AUR62024646-RA	0h	24h	OK	44.8543	19.8163	-1.17856	-2.22098	0.0002	0.00118357	yes	coding	/
AUR62024669-RA	0h	24h	OK	11.1938	4.77007	-1.23062	-2.10227	0.00055	0.00319537	yes	coding	/
AUR62024710-RA	0h	24h	OK	2.62008	21.5777	3.04186	4.11974	5e-05	0.000327342	yes	coding	/
AUR62024731-RA	0h	24h	OK	10.7502	1.60227	-2.74617	-2.67027	0.0013	0.00741411	yes	coding	/
AUR62024778-RA	0h	24h	OK	1.66611	5.21537	1.64628	1.67774	0.00865	0.0456181	yes	coding	/
AUR62024808-RA	0h	24h	OK	113.072	24.8748	-2.18448	-5.07961	5e-05	0.000327342	yes	coding	/
AUR62024867-RA	0h	24h	OK	5.08957	0.79937	-2.67061	-2.57371	0.0005	0.00290939	yes	coding	/
AUR62024874-RA	0h	24h	OK	393.785	166.075	-1.24558	-2.98204	5e-05	0.000327342	yes	coding	/
AUR62024899-RA	0h	24h	OK	22.1309	8.42808	-1.39279	-2.37836	0.00015	0.000893574	yes	coding	/
AUR62024925-RA	0h	24h	OK	67.6239	170.49	1.33408	2.9219	5e-05	0.000327342	yes	coding	/
AUR62024936-RA	0h	24h	OK	17.958	3.44581	-2.38171	-3.06735	0.00045	0.00262489	yes	coding	/
AUR62024949-RA	0h	24h	OK	1.72422	4.36552	1.34021	1.83666	0.0025	0.0140249	yes	coding	/
AUR62024963-RA	0h	24h	OK	22.9599	6.07642	-1.91782	-3.10202	5e-05	0.000327342	yes	coding	/
AUR62024992-RA	0h	24h	OK	6.91735	2.22864	-1.63406	-2.06847	0.00095	0.00545853	yes	coding	/
AUR62024994-RA	0h	24h	OK	1.01781	7.31578	2.84554	2.74515	0.0006	0.00348122	yes	coding	/
AUR62025003-RA	0h	24h	OK	83.9845	9.2232	-3.18678	-3.50286	0.00095	0.00545853	yes	coding	/
AUR62025051-RA	0h	24h	OK	178.654	59.1364	-1.59505	-3.35571	5e-05	0.000327342	yes	coding	/
AUR62025113-RA	0h	24h	OK	78.9698	21.3016	-1.89034	-4.22386	5e-05	0.000327342	yes	coding	/
AUR62025115-RA	0h	24h	OK	1298.63	357.141	-1.86242	-3.95149	5e-05	0.000327342	yes	coding	/
AUR62025145-RA	0h	24h	OK	60.5251	27.663	-1.12957	-2.21555	0.0002	0.00118357	yes	coding	/
AUR62025181-RA	0h	24h	OK	1.46386	0	#NAME?	#NAME?	5e-05	0.000327342	yes	coding	/
AUR62025183-RA	0h	24h	OK	438.479	205.23	-1.09527	-2.50032	5e-05	0.000327342	yes	coding	/
AUR62025200-RA	0h	24h	OK	0.612461	7.5241	3.61883	2.32316	0.0019	0.0107415	yes	coding	/
AUR62025208-RA	0h	24h	OK	100.121	14.7133	-2.76655	-3.43902	0.0001	0.000607975	yes	coding	/
AUR62025340-RA	0h	24h	OK	12.2754	3.14659	-1.96391	-1.78726	0.0087	0.0458743	yes	coding	/
AUR62025362-RA	0h	24h	OK	13.9118	4.60839	-1.59398	-2.12352	0.00205	0.0115672	yes	coding	/
AUR62025429-RA	0h	24h	OK	19.4333	6.80874	-1.51307	-2.56519	0.00015	0.000893574	yes	coding	/
AUR62025438-RA	0h	24h	OK	10.2693	1.04628	-3.29499	-3.68618	5e-05	0.000327342	yes	coding	/
AUR62025452-RA	0h	24h	OK	895.747	409.88	-1.12789	-2.6092	5e-05	0.000327342	yes	coding	/
AUR62025470-RA	0h	24h	OK	36.1912	17.1406	-1.07822	-2.1335	0.00045	0.00262489	yes	coding	/
AUR62025473-RA	0h	24h	OK	8.97411	29.842	1.7335	2.25332	0.00045	0.00262489	yes	coding	/
AUR62025500-RA	0h	24h	OK	8.97169	4.38937	-1.03137	-1.85519	0.00195	0.0110149	yes	coding	/
AUR62025509-RA	0h	24h	OK	12.8297	73.2517	2.51338	2.29769	0.00175	0.00991359	yes	coding	/
AUR62025510-RA	0h	24h	OK	5.86791	36.7185	2.64559	2.74501	5e-05	0.000327342	yes	coding	/
AUR62025512-RA	0h	24h	OK	25.6471	348.737	3.76527	4.15541	5e-05	0.000327342	yes	coding	/
AUR62025522-RA	0h	24h	OK	662.402	295.441	-1.16484	-2.61752	5e-05	0.000327342	yes	coding	/
AUR62025559-RA	0h	24h	OK	336.626	143.111	-1.23401	-2.96619	5e-05	0.000327342	yes	coding	/
AUR62025562-RA	0h	24h	OK	340.785	2431.87	2.83513	5.0331	5e-05	0.000327342	yes	noncoding	LncRNA
AUR62025591-RA	0h	24h	OK	59.8666	19.1243	-1.64635	-2.55304	0.00345	0.0188988	yes	coding	/
AUR62025621-RA	0h	24h	OK	78.2029	19.0924	-2.03423	-3.39837	5e-05	0.000327342	yes	coding	/
AUR62025638-RA	0h	24h	OK	1.03255	6.39788	2.63138	2.24079	0.0007	0.00404934	yes	coding	/
AUR62025639-RA	0h	24h	OK	50.6065	18.4224	-1.45786	-3.38509	5e-05	0.000327342	yes	coding	/
AUR62025656-RA	0h	24h	OK	64.1391	11.3421	-2.49951	-3.49901	0.00015	0.000893574	yes	coding	/
AUR62025658-RA	0h	24h	OK	8.20338	2.14193	-1.93731	-2.28537	0.0037	0.020223	yes	coding	/
AUR62025699-RA	0h	24h	OK	217.813	68.2172	-1.67488	-3.89678	5e-05	0.000327342	yes	coding	/
AUR62025754-RA	0h	24h	OK	53.3489	19.4264	-1.45744	-1.80252	0.0064	0.0342447	yes	coding	/
AUR62025808-RA	0h	24h	OK	89.3429	29.0898	-1.61884	-3.15453	5e-05	0.000327342	yes	noncoding	LncRNA
AUR62025872-RA	0h	24h	OK	12.2848	95.0326	2.95155	3.65726	5e-05	0.000327342	yes	coding	/
AUR62025900-RA	0h	24h	OK	57.1143	19.6818	-1.53699	-3.26669	5e-05	0.000327342	yes	coding	/
AUR62025909-RA	0h	24h	OK	66.0329	21.1797	-1.64051	-3.45678	5e-05	0.000327342	yes	coding	/
AUR62025925-RA	0h	24h	OK	919.875	299.586	-1.61847	-3.80983	5e-05	0.000327342	yes	coding	/
AUR62025936-RA	0h	24h	OK	5.94956	21.8144	1.87443	2.70639	5e-05	0.000327342	yes	coding	/
AUR62025944-RA	0h	24h	OK	19.0287	4.43006	-2.10278	-3.21372	5e-05	0.000327342	yes	coding	/
AUR62025951-RA	0h	24h	OK	123.276	42.1461	-1.54842	-2.94181	5e-05	0.000327342	yes	coding	/
AUR62025985-RA	0h	24h	OK	10.5087	3.40925	-1.62405	-2.7182	0.0001	0.000607975	yes	coding	/
AUR62025995-RA	0h	24h	OK	43.9591	12.0604	-1.86588	-3.76927	5e-05	0.000327342	yes	coding	/
AUR62026024-RA	0h	24h	OK	28.1654	7.38615	-1.93103	-4.21573	5e-05	0.000327342	yes	coding	/
AUR62026025-RA	0h	24h	OK	802.167	285.987	-1.48795	-3.29826	5e-05	0.000327342	yes	coding	/
AUR62026031-RA	0h	24h	OK	33.8085	2.70033	-3.64618	-2.8408	0.0001	0.000607975	yes	coding	/
AUR62026053-RA	0h	24h	OK	472.22	191.789	-1.29994	-3.10693	5e-05	0.000327342	yes	noncoding	LncRNA
AUR62026060-RA	0h	24h	OK	38.2027	9.27775	-2.04183	-2.97831	5e-05	0.000327342	yes	coding	/
AUR62026092-RA	0h	24h	OK	2.33473	0.526419	-2.14897	-1.82017	0.0047	0.0254789	yes	coding	/
AUR62026209-RA	0h	24h	OK	29.4919	72.5885	1.29942	2.56314	5e-05	0.000327342	yes	coding	/
AUR62026324-RA	0h	24h	OK	70.1447	33.3036	-1.07466	-2.44323	0.0001	0.000607975	yes	coding	/
AUR62026341-RA	0h	24h	OK	70.5545	5.41725	-3.70311	-4.69025	5e-05	0.000327342	yes	coding	/
AUR62026389-RA	0h	24h	OK	14.4704	6.29492	-1.20085	-1.70605	0.0069	0.0367907	yes	coding	/
AUR62026483-RA	0h	24h	OK	18.158	82.7289	2.18779	3.57295	5e-05	0.000327342	yes	coding	/
AUR62026484-RA	0h	24h	OK	65.1942	193.22	1.56743	3.56259	5e-05	0.000327342	yes	coding	/
AUR62026523-RA	0h	24h	OK	115.405	52.0457	-1.14886	-2.7253	5e-05	0.000327342	yes	coding	/
AUR62026546-RA	0h	24h	OK	126.494	13.1071	-3.27066	-6.18748	5e-05	0.000327342	yes	coding	/
AUR62026626-RA	0h	24h	OK	707.853	310.618	-1.18831	-2.806	5e-05	0.000327342	yes	coding	/
AUR62026631-RA	0h	24h	OK	4.99761	33.3152	2.73687	3.93498	5e-05	0.000327342	yes	coding	/
AUR62026638-RA	0h	24h	OK	23.2256	10.165	-1.1921	-1.84408	0.00275	0.0153829	yes	coding	/
AUR62026663-RA	0h	24h	OK	179.003	84.0339	-1.09094	-1.88155	0.00195	0.0110149	yes	coding	/
AUR62026665-RA	0h	24h	OK	95.4814	34.9193	-1.4512	-3.29575	5e-05	0.000327342	yes	coding	/
AUR62026678-RA	0h	24h	OK	29.1975	13.7198	-1.08958	-1.89194	0.00225	0.0126629	yes	coding	/
AUR62026682-RA	0h	24h	OK	15.0016	6.3485	-1.24062	-1.75583	0.00535	0.0288484	yes	coding	/
AUR62026688-RA	0h	24h	OK	30.6517	4.84398	-2.6617	-3.76413	5e-05	0.000327342	yes	coding	/
AUR62026730-RA	0h	24h	OK	9.4913	20.6164	1.11911	2.28651	0.00015	0.000893574	yes	coding	/
AUR62026799-RA	0h	24h	OK	988.138	309.09	-1.67669	-3.63756	5e-05	0.000327342	yes	coding	/
AUR62026801-RA	0h	24h	OK	273.746	119.303	-1.19821	-2.74208	5e-05	0.000327342	yes	coding	/
AUR62026804-RA	0h	24h	OK	533.189	29.0861	-4.19624	-7.05143	5e-05	0.000327342	yes	coding	/
AUR62026808-RA	0h	24h	OK	1.73279	0	#NAME?	#NAME?	0.0001	0.000607975	yes	coding	/
AUR62026830-RA	0h	24h	OK	6.42789	1.67206	-1.94272	-2.16182	0.0081	0.0428408	yes	coding	/
AUR62026849-RA	0h	24h	OK	49.8415	17.3766	-1.5202	-3.25211	5e-05	0.000327342	yes	coding	/
AUR62026853-RA	0h	24h	OK	212.349	30.3297	-2.80763	-6.21192	5e-05	0.000327342	yes	coding	/
AUR62026903-RA	0h	24h	OK	71.0677	21.3061	-1.73793	-1.75707	0.0033	0.0181073	yes	coding	/
AUR62026906-RA	0h	24h	OK	170.825	34.0515	-2.32673	-3.79472	5e-05	0.000327342	yes	coding	/
AUR62026954-RA	0h	24h	OK	7.37712	21.9404	1.57246	2.33718	0.0003	0.00176267	yes	coding	/
AUR62026974-RA	0h	24h	OK	0.441475	17.7248	5.3273	3.20694	0.0018	0.0101886	yes	coding	/
AUR62026978-RA	0h	24h	OK	47.4341	10.142	-2.22558	-3.86049	5e-05	0.000327342	yes	coding	/
AUR62027031-RA	0h	24h	OK	9.21569	1.73972	-2.40524	-2.89899	0.0003	0.00176267	yes	coding	/
AUR62027035-RA	0h	24h	OK	3.21923	26.9499	3.06549	3.49391	5e-05	0.000327342	yes	coding	/
AUR62027036-RA	0h	24h	OK	54.5856	25.7359	-1.08474	-2.24406	0.00015	0.000893574	yes	coding	/
AUR62027070-RA	0h	24h	OK	22.8273	8.72567	-1.38742	-2.09223	0.0031	0.0172594	yes	coding	/
AUR62027080-RA	0h	24h	OK	8.47188	3.0596	-1.46934	-2.57055	5e-05	0.000327342	yes	coding	/
AUR62027117-RA	0h	24h	OK	79.3143	29.2	-1.44161	-2.90963	5e-05	0.000327342	yes	coding	/
AUR62027259-RA	0h	24h	OK	24.0464	48.9905	1.02668	1.75656	0.0021	0.011841	yes	coding	/
AUR62027273-RA	0h	24h	OK	131.968	35.6826	-1.8869	-3.96186	5e-05	0.000327342	yes	coding	/
AUR62027289-RA	0h	24h	OK	38.4272	13.5681	-1.50191	-2.36294	5e-05	0.000327342	yes	coding	/
AUR62027309-RA	0h	24h	OK	64.5149	23.4842	-1.45794	-2.40767	5e-05	0.000327342	yes	coding	/
AUR62027317-RA	0h	24h	OK	659.904	246.947	-1.41806	-3.18549	5e-05	0.000327342	yes	coding	/
AUR62027318-RA	0h	24h	OK	18.7	7.43423	-1.33078	-2.09016	0.0008	0.00461507	yes	coding	/
AUR62027320-RA	0h	24h	OK	17.1863	5.65586	-1.60344	-2.00617	0.0032	0.0178002	yes	coding	/
AUR62027365-RA	0h	24h	OK	378.027	75.3313	-2.32717	-5.40407	5e-05	0.000327342	yes	coding	/
AUR62027396-RA	0h	24h	OK	247.124	88.043	-1.48896	-3.2242	5e-05	0.000327342	yes	coding	/
AUR62027397-RA	0h	24h	OK	58.8248	14.6572	-2.00482	-3.87905	5e-05	0.000327342	yes	coding	/
AUR62027422-RA	0h	24h	OK	19.9615	118.255	2.56661	5.23287	5e-05	0.000327342	yes	coding	/
AUR62027444-RA	0h	24h	OK	34.5241	11.487	-1.58761	-2.71747	5e-05	0.000327342	yes	coding	/
AUR62027472-RA	0h	24h	OK	292.266	975.465	1.73881	3.97986	5e-05	0.000327342	yes	coding	/
AUR62027482-RA	0h	24h	OK	20.9244	133.476	2.67332	5.07141	5e-05	0.000327342	yes	coding	/
AUR62027520-RA	0h	24h	OK	525.791	224.622	-1.22699	-2.95374	5e-05	0.000327342	yes	coding	/
AUR62027553-RA	0h	24h	OK	8.89906	162.742	4.19279	6.18397	5e-05	0.000327342	yes	coding	/
AUR62027572-RA	0h	24h	OK	14.9505	3.16613	-2.23941	-1.77658	0.00355	0.0194249	yes	coding	/
AUR62027590-RA	0h	24h	OK	4.91409	0.820115	-2.58303	-2.81502	0.0002	0.00118357	yes	coding	/
AUR62027613-RA	0h	24h	OK	1400.31	415.74	-1.752	-3.86625	5e-05	0.000327342	yes	coding	/
AUR62027652-RA	0h	24h	OK	10.8104	3.30125	-1.71134	-2.03393	0.0027	0.0151148	yes	coding	/
AUR62027702-RA	0h	24h	OK	87.619	39.668	-1.14327	-2.64966	5e-05	0.000327342	yes	coding	/
AUR62027707-RA	0h	24h	OK	18.3684	6.85169	-1.42269	-2.14806	0.00125	0.00713476	yes	coding	/
AUR62027741-RA	0h	24h	OK	2.77538	41.5892	3.90545	3.7971	5e-05	0.000327342	yes	coding	/
AUR62027742-RA	0h	24h	OK	14.0902	56.815	2.01158	3.6312	5e-05	0.000327342	yes	coding	/
AUR62027746-RA	0h	24h	OK	53.987	22.8334	-1.24147	-2.56363	0.0001	0.000607975	yes	coding	/
AUR62027785-RA	0h	24h	OK	2.47811	12.665	2.35353	2.2775	0.00255	0.0142979	yes	coding	/
AUR62027800-RA	0h	24h	OK	613.49	205.319	-1.57917	-3.07609	5e-05	0.000327342	yes	coding	/
AUR62027805-RA	0h	24h	OK	229.495	94.6931	-1.27713	-2.96338	5e-05	0.000327342	yes	coding	/
AUR62027844-RA	0h	24h	OK	8.29082	20.7164	1.32119	2.01	0.00145	0.0082515	yes	coding	/
AUR62027857-RA	0h	24h	OK	129.871	52.8751	-1.29642	-2.92741	5e-05	0.000327342	yes	coding	/
AUR62027877-RA	0h	24h	OK	72.2376	29.0542	-1.31401	-2.7835	5e-05	0.000327342	yes	coding	/
AUR62027888-RA	0h	24h	OK	31.0624	7.39271	-2.07099	-3.63234	5e-05	0.000327342	yes	coding	/
AUR62027896-RA	0h	24h	OK	36.9556	16.1593	-1.19343	-2.51164	5e-05	0.000327342	yes	coding	/
AUR62027911-RA	0h	24h	OK	465.531	212.787	-1.12947	-2.02495	0.00105	0.00602046	yes	coding	/
AUR62027929-RA	0h	24h	OK	242.75	64.2761	-1.91712	-4.39925	5e-05	0.000327342	yes	coding	/
AUR62027930-RA	0h	24h	OK	3.93544	0.846974	-2.21614	-2.05588	0.00345	0.0188988	yes	coding	/
AUR62027932-RA	0h	24h	OK	763.123	144.242	-2.40343	-1.79721	0.0023	0.0129366	yes	coding	/
AUR62027941-RA	0h	24h	OK	821.44	206.027	-1.99532	-1.63635	0.00785	0.0415703	yes	coding	/
AUR62027965-RA	0h	24h	OK	9.9552	3.06451	-1.69979	-2.38297	0.00035	0.00204936	yes	coding	/
AUR62028086-RA	0h	24h	OK	82.8271	185.603	1.16404	2.78805	5e-05	0.000327342	yes	coding	/
AUR62028101-RA	0h	24h	OK	20.0862	59.6016	1.56915	2.83557	5e-05	0.000327342	yes	coding	/
AUR62028108-RA	0h	24h	OK	856.728	239.155	-1.84089	-4.0933	5e-05	0.000327342	yes	coding	/
AUR62028149-RA	0h	24h	OK	27.6488	10.4598	-1.40236	-2.49338	5e-05	0.000327342	yes	coding	/
AUR62028183-RA	0h	24h	OK	3.02165	11.4085	1.91669	1.97766	0.0028	0.0156529	yes	coding	/
AUR62028217-RA	0h	24h	OK	14.1959	37.4659	1.4001	2.65896	5e-05	0.000327342	yes	coding	/
AUR62028302-RA	0h	24h	OK	16.2171	7.2833	-1.15485	-1.69379	0.007	0.0373005	yes	coding	/
AUR62028321-RA	0h	24h	OK	143.196	70.8964	-1.0142	-2.35018	5e-05	0.000327342	yes	coding	/
AUR62028341-RA	0h	24h	OK	145.044	0	#NAME?	#NAME?	0.00035	0.00204936	yes	noncoding	LncRNA
AUR62028352-RA	0h	24h	OK	8.84315	3.87198	-1.19149	-1.84708	0.005	0.027048	yes	coding	/
AUR62028367-RA	0h	24h	OK	5.86015	17.7267	1.59691	1.78124	0.006	0.0321845	yes	coding	/
AUR62028375-RA	0h	24h	OK	1.72112	13.4666	2.96796	3.46215	5e-05	0.000327342	yes	coding	/
AUR62028380-RA	0h	24h	OK	5.81253	12.6013	1.11634	2.11988	0.0001	0.000607975	yes	coding	/
AUR62028436-RA	0h	24h	OK	40.8662	15.7343	-1.37699	-2.11321	0.00025	0.00147346	yes	coding	/
AUR62028474-RA	0h	24h	OK	385.55	99.7608	-1.95037	-4.59448	5e-05	0.000327342	yes	coding	/
AUR62028497-RA	0h	24h	OK	14.3466	5.43936	-1.3992	-1.92989	0.00335	0.0183629	yes	coding	/
AUR62028557-RA	0h	24h	OK	258.915	34.3086	-2.91584	-6.62241	5e-05	0.000327342	yes	coding	/
AUR62028562-RA	0h	24h	OK	14.5217	29.2876	1.01208	1.97842	0.00115	0.00657841	yes	coding	/
AUR62028573-RA	0h	24h	OK	17.711	208.41	3.5567	5.08416	5e-05	0.000327342	yes	coding	/
AUR62028580-RA	0h	24h	OK	133.292	53.5442	-1.31578	-2.59899	5e-05	0.000327342	yes	coding	/
AUR62028594-RA	0h	24h	OK	8.39049	95.2679	3.50516	3.99725	5e-05	0.000327342	yes	coding	/
AUR62028604-RA	0h	24h	OK	4.2543	34.655	3.02607	2.8279	0.0009	0.00517825	yes	coding	/
AUR62028627-RA	0h	24h	OK	221.57	67.6313	-1.712	-3.982	5e-05	0.000327342	yes	coding	/
AUR62028637-RA	0h	24h	OK	1.61548	9.17058	2.50505	1.82637	0.00345	0.0188988	yes	coding	/
AUR62028653-RA	0h	24h	OK	28.8089	11.8581	-1.28064	-2.61896	5e-05	0.000327342	yes	coding	/
AUR62028700-RA	0h	24h	OK	186.927	65.0195	-1.52353	-3.43388	5e-05	0.000327342	yes	coding	/
AUR62028730-RA	0h	24h	OK	25.8283	4.8904	-2.40093	-2.59559	0.0025	0.0140249	yes	coding	/
AUR62028775-RA	0h	24h	OK	374.933	155.709	-1.26778	-2.84645	5e-05	0.000327342	yes	coding	/
AUR62028778-RA	0h	24h	OK	19.1699	80.5971	2.07189	2.70759	5e-05	0.000327342	yes	coding	/
AUR62028789-RA	0h	24h	OK	40.3635	7.23918	-2.47915	-1.88783	0.00755	0.040075	yes	coding	/
AUR62028815-RA	0h	24h	OK	18.5842	7.95112	-1.22484	-1.98628	0.0009	0.00517825	yes	coding	/
AUR62028821-RA	0h	24h	OK	26.574	8.35776	-1.66883	-3.12498	5e-05	0.000327342	yes	coding	/
AUR62028824-RA	0h	24h	OK	3.72231	9.22812	1.30984	1.58393	0.00725	0.0385499	yes	coding	/
AUR62028832-RA	0h	24h	OK	293.007	83.6422	-1.80863	-4.2943	5e-05	0.000327342	yes	coding	/
AUR62028849-RA	0h	24h	OK	1.63594	0	#NAME?	#NAME?	5e-05	0.000327342	yes	coding	/
AUR62028863-RA	0h	24h	OK	9.58417	101.669	3.40709	5.05875	5e-05	0.000327342	yes	coding	/
AUR62028864-RA	0h	24h	OK	54.9432	3.06582	-4.1636	-4.56029	5e-05	0.000327342	yes	coding	/
AUR62028868-RA	0h	24h	OK	31.6354	13.9176	-1.18463	-2.16135	0.00035	0.00204936	yes	coding	/
AUR62028895-RA	0h	24h	OK	15.9371	5.72405	-1.47728	-1.86465	0.0059	0.0316649	yes	coding	/
AUR62028913-RA	0h	24h	OK	418.739	207.86	-1.01044	-2.42433	5e-05	0.000327342	yes	coding	/
AUR62028924-RA	0h	24h	OK	16.7549	76.2821	2.18676	2.48761	0.0002	0.00118357	yes	coding	/
AUR62028929-RA	0h	24h	OK	21.7237	7.76665	-1.4839	-2.17766	0.00035	0.00204936	yes	coding	/
AUR62028991-RA	0h	24h	OK	475.692	178.41	-1.41483	-3.23773	5e-05	0.000327342	yes	coding	/
AUR62028998-RA	0h	24h	OK	6.67799	18.8374	1.49611	1.75755	0.00665	0.0355094	yes	coding	/
AUR62029015-RA	0h	24h	OK	6.33083	16.8416	1.41156	1.75003	0.0053	0.0285903	yes	coding	/
AUR62029069-RA	0h	24h	OK	6.92005	1.85926	-1.89605	-3.03897	5e-05	0.000327342	yes	coding	/
AUR62029073-RA	0h	24h	OK	11.1267	2.19348	-2.34273	-3.17591	5e-05	0.000327342	yes	coding	/
AUR62029132-RA	0h	24h	OK	16.9789	5.23261	-1.69814	-3.05367	5e-05	0.000327342	yes	coding	/
AUR62029161-RA	0h	24h	OK	5.76823	19.0505	1.72363	2.37697	0.0002	0.00118357	yes	coding	/
AUR62029207-RA	0h	24h	OK	9.22326	23.2282	1.33253	2.52624	5e-05	0.000327342	yes	coding	/
AUR62029228-RA	0h	24h	OK	49.9089	19.8883	-1.32738	-2.93795	5e-05	0.000327342	yes	coding	/
AUR62029252-RA	0h	24h	OK	10.0012	0	#NAME?	#NAME?	5e-05	0.000327342	yes	coding	/
AUR62029272-RA	0h	24h	OK	8.79087	33.4191	1.92659	3.19223	5e-05	0.000327342	yes	coding	/
AUR62029281-RA	0h	24h	OK	66.6087	2.37657	-4.80876	-3.19078	0.0011	0.00630043	yes	coding	/
AUR62029354-RA	0h	24h	OK	20.2431	79.6404	1.97607	3.72125	5e-05	0.000327342	yes	coding	/
AUR62029358-RA	0h	24h	OK	5.522	1.53871	-1.84347	-1.94138	0.0041	0.0223336	yes	coding	/
AUR62029383-RA	0h	24h	OK	131.284	55.2438	-1.24881	-2.96504	5e-05	0.000327342	yes	coding	/
AUR62029389-RA	0h	24h	OK	9.26325	0	#NAME?	#NAME?	5e-05	0.000327342	yes	coding	/
AUR62029402-RA	0h	24h	OK	13.9768	2.67796	-2.38382	-2.26865	0.0089	0.0468553	yes	coding	/
AUR62029420-RA	0h	24h	OK	27.5772	9.07411	-1.60365	-3.04365	5e-05	0.000327342	yes	coding	/
AUR62029432-RA	0h	24h	OK	11.8371	5.6223	-1.07409	-1.71106	0.0047	0.0254789	yes	coding	/
AUR62029467-RA	0h	24h	OK	4.00466	11.64	1.53934	2.03771	0.0018	0.0101886	yes	coding	/
AUR62029475-RA	0h	24h	OK	22.5094	6.33914	-1.82817	-3.75193	5e-05	0.000327342	yes	coding	/
AUR62029502-RA	0h	24h	OK	7.3792	42.1623	2.51442	2.28789	0.00125	0.00713476	yes	coding	/
AUR62029521-RA	0h	24h	OK	15.4822	2.22124	-2.80117	-2.782	0.0006	0.00348122	yes	coding	/
AUR62029565-RA	0h	24h	OK	16.0498	103.601	2.6904	4.90011	5e-05	0.000327342	yes	coding	/
AUR62029569-RA	0h	24h	OK	1.79574	15.1351	3.07525	2.90966	0.00045	0.00262489	yes	coding	/
AUR62029587-RA	0h	24h	OK	65.3291	30.4093	-1.10321	-2.30535	5e-05	0.000327342	yes	coding	/
AUR62029622-RA	0h	24h	OK	13.3766	40.8843	1.61183	3.24443	5e-05	0.000327342	yes	coding	/
AUR62029627-RA	0h	24h	OK	5.49211	1.95563	-1.48972	-1.71459	0.00675	0.0360219	yes	coding	/
AUR62029640-RA	0h	24h	OK	19.3541	227.428	3.5547	5.98995	5e-05	0.000327342	yes	coding	/
AUR62029652-RA	0h	24h	OK	95.0374	31.1967	-1.6071	-3.2139	5e-05	0.000327342	yes	coding	/
AUR62029655-RA	0h	24h	OK	12.5935	2.96289	-2.0876	-1.9969	0.0023	0.0129366	yes	coding	/
AUR62029656-RA	0h	24h	OK	76.1084	25.072	-1.60198	-3.46753	5e-05	0.000327342	yes	coding	/
AUR62029660-RA	0h	24h	OK	32.5597	79.539	1.28858	2.82764	5e-05	0.000327342	yes	coding	/
AUR62029678-RA	0h	24h	OK	178.496	76.7621	-1.21743	-2.91203	5e-05	0.000327342	yes	coding	/
AUR62029695-RA	0h	24h	OK	1.78557	22.1662	3.63391	3.18517	5e-05	0.000327342	yes	coding	/
AUR62029708-RA	0h	24h	OK	273.25	93.3372	-1.5497	-3.42263	5e-05	0.000327342	yes	coding	/
AUR62029730-RA	0h	24h	OK	656.324	220.497	-1.57365	-3.6838	5e-05	0.000327342	yes	coding	/
AUR62029767-RA	0h	24h	OK	6.03164	2.02211	-1.57669	-2.30267	0.0008	0.00461507	yes	coding	/
AUR62029769-RA	0h	24h	OK	576.636	209.212	-1.4627	-3.42965	5e-05	0.000327342	yes	coding	/
AUR62029793-RA	0h	24h	OK	9.13166	3.54851	-1.36366	-2.11346	0.0006	0.00348122	yes	coding	/
AUR62029795-RA	0h	24h	OK	46.564	8.02216	-2.53715	-3.34601	5e-05	0.000327342	yes	coding	/
AUR62029801-RA	0h	24h	OK	18.2118	3.76982	-2.2723	-2.56929	0.0023	0.0129366	yes	coding	/
AUR62029843-RA	0h	24h	OK	1.6316	38.3672	4.55552	3.40237	0.00055	0.00319537	yes	coding	/
AUR62029861-RA	0h	24h	OK	157.749	76.278	-1.04829	-2.30755	5e-05	0.000327342	yes	coding	/
AUR62029901-RA	0h	24h	OK	1.24774	9.45004	2.92101	2.1093	0.009	0.047354	yes	coding	/
AUR62029922-RA	0h	24h	OK	31.373	11.1114	-1.49748	-3.12539	5e-05	0.000327342	yes	coding	/
AUR62029956-RA	0h	24h	OK	571.22	156.669	-1.86633	-4.31617	5e-05	0.000327342	yes	coding	/
AUR62030011-RA	0h	24h	OK	136.893	59.9244	-1.19183	-2.84306	5e-05	0.000327342	yes	coding	/
AUR62030051-RA	0h	24h	OK	15.2607	6.361	-1.2625	-2.11947	0.00155	0.00880597	yes	coding	/
AUR62030099-RA	0h	24h	OK	1.03232	3.51985	1.76962	1.84037	0.0053	0.0285903	yes	coding	/
AUR62030169-RA	0h	24h	OK	1.47102	11.8422	3.00905	1.84778	0.0067	0.0357657	yes	coding	/
AUR62030233-RA	0h	24h	OK	1022.29	424.541	-1.26782	-2.76731	5e-05	0.000327342	yes	coding	/
AUR62030252-RA	0h	24h	OK	1.46572	0	#NAME?	#NAME?	5e-05	0.000327342	yes	coding	/
AUR62030263-RA	0h	24h	OK	43.4598	12.6187	-1.78412	-3.37299	5e-05	0.000327342	yes	coding	/
AUR62030273-RA	0h	24h	OK	14.5041	34.2653	1.24029	1.68703	0.0047	0.0254789	yes	coding	/
AUR62030308-RA	0h	24h	OK	17.2335	6.00012	-1.52215	-2.73348	5e-05	0.000327342	yes	coding	/
AUR62030360-RA	0h	24h	OK	2.45045	8.62766	1.81592	1.70858	0.0063	0.0337275	yes	coding	/
AUR62030395-RA	0h	24h	OK	0.363814	2.67386	2.87765	1.71442	0.0083	0.0438482	yes	coding	/
AUR62030422-RA	0h	24h	OK	182.345	62.76	-1.53876	-3.52142	5e-05	0.000327342	yes	coding	/
AUR62030424-RA	0h	24h	OK	29.5172	66.0435	1.16186	1.80769	0.0044	0.0239048	yes	coding	/
AUR62030428-RA	0h	24h	OK	11.0684	2.27152	-2.28472	-2.76785	0.00025	0.00147346	yes	coding	/
AUR62030475-RA	0h	24h	OK	20.7732	6.8198	-1.60692	-2.35052	0.00035	0.00204936	yes	coding	/
AUR62030478-RA	0h	24h	OK	301.421	139.287	-1.11372	-2.60193	5e-05	0.000327342	yes	coding	/
AUR62030503-RA	0h	24h	OK	0	313.311	inf	#NAME?	5e-05	0.000327342	yes	coding	/
AUR62030506-RA	0h	24h	OK	10.4007	3.69749	-1.49206	-2.28652	0.00045	0.00262489	yes	coding	/
AUR62030521-RA	0h	24h	OK	90.3808	38.6206	-1.22665	-1.65779	0.0071	0.0378109	yes	coding	/
AUR62030538-RA	0h	24h	OK	3.47536	10.9498	1.65568	1.84916	0.00355	0.0194249	yes	coding	/
AUR62030568-RA	0h	24h	OK	5.38632	13.2055	1.29376	1.95987	0.0014	0.00797175	yes	coding	/
AUR62030595-RA	0h	24h	OK	9.64374	3.52411	-1.45233	-1.85355	0.00455	0.0246898	yes	coding	/
AUR62030611-RA	0h	24h	OK	76.95	11.4706	-2.74599	-4.53222	5e-05	0.000327342	yes	coding	/
AUR62030623-RA	0h	24h	OK	6.33499	19.6039	1.62973	2.08338	0.0021	0.011841	yes	coding	/
AUR62030636-RA	0h	24h	OK	16.4979	7.2335	-1.18952	-1.90614	0.00225	0.0126629	yes	coding	/
AUR62030643-RA	0h	24h	OK	64.9027	15.5057	-2.06548	-3.71642	5e-05	0.000327342	yes	coding	/
AUR62030661-RA	0h	24h	OK	27.5538	8.18225	-1.75168	-2.34693	0.00045	0.00262489	yes	coding	/
AUR62030674-RA	0h	24h	OK	461.865	187.053	-1.30403	-3.136	5e-05	0.000327342	yes	coding	/
AUR62030688-RA	0h	24h	OK	12.5357	4.44557	-1.4956	-1.84279	0.003	0.0167171	yes	coding	/
AUR62030691-RA	0h	24h	OK	15.1467	31.9482	1.07673	1.76245	0.0044	0.0239048	yes	coding	/
AUR62030712-RA	0h	24h	OK	19.4513	48.1466	1.30757	2.7676	5e-05	0.000327342	yes	coding	/
AUR62030716-RA	0h	24h	OK	3.99465	20.1553	2.33502	2.07285	0.0043	0.0233828	yes	coding	/
AUR62030722-RA	0h	24h	OK	70.7225	16.22	-2.1244	-4.15404	5e-05	0.000327342	yes	coding	/
AUR62030746-RA	0h	24h	OK	27.7848	4.17138	-2.7357	-5.22713	5e-05	0.000327342	yes	coding	/
AUR62030771-RA	0h	24h	OK	107.669	36.3251	-1.56756	-2.00044	0.00255	0.0142979	yes	coding	/
AUR62030803-RA	0h	24h	OK	13.7033	29.5163	1.10699	2.17221	0.0004	0.00233755	yes	coding	/
AUR62030821-RA	0h	24h	OK	18.1405	7.12523	-1.34821	-2.13462	0.0007	0.00404934	yes	coding	/
AUR62030831-RA	0h	24h	OK	69.998	29.7887	-1.23255	-2.66105	5e-05	0.000327342	yes	coding	/
AUR62030833-RA	0h	24h	OK	62.6094	136.124	1.12047	2.33317	5e-05	0.000327342	yes	coding	/
AUR62030851-RA	0h	24h	OK	224.237	106.398	-1.07555	-2.54779	5e-05	0.000327342	yes	coding	/
AUR62030870-RA	0h	24h	OK	1016.69	291.428	-1.80267	-3.99954	5e-05	0.000327342	yes	coding	/
AUR62030875-RA	0h	24h	OK	6.22086	1.43061	-2.12049	-2.36514	0.00045	0.00262489	yes	coding	/
AUR62030879-RA	0h	24h	OK	3.37783	34.3137	3.34462	4.3143	5e-05	0.000327342	yes	coding	/
AUR62030891-RA	0h	24h	OK	293.881	106.303	-1.46705	-2.66696	5e-05	0.000327342	yes	coding	/
AUR62030940-RA	0h	24h	OK	109.908	44.123	-1.31669	-2.28097	0.00025	0.00147346	yes	coding	/
AUR62030978-RA	0h	24h	OK	122.308	9.82797	-3.63748	-5.25957	5e-05	0.000327342	yes	coding	/
AUR62031083-RA	0h	24h	OK	43.327	4.12873	-3.3915	-3.69642	5e-05	0.000327342	yes	coding	/
AUR62031084-RA	0h	24h	OK	110.512	30.279	-1.86782	-4.27268	5e-05	0.000327342	yes	coding	/
AUR62031127-RA	0h	24h	OK	14.3325	5.12527	-1.48359	-2.00186	0.00215	0.0121157	yes	coding	/
AUR62031153-RA	0h	24h	OK	42.958	12.8655	-1.73942	-2.33676	0.001	0.00573806	yes	coding	/
AUR62031164-RA	0h	24h	OK	1.52378	0	#NAME?	#NAME?	0.0001	0.000607975	yes	coding	/
AUR62031223-RA	0h	24h	OK	3.30338	0	#NAME?	#NAME?	0.00015	0.000893574	yes	coding	/
AUR62031299-RA	0h	24h	OK	25.8381	10.8891	-1.24661	-2.49965	5e-05	0.000327342	yes	coding	/
AUR62031323-RA	0h	24h	OK	33.0365	75.2316	1.18728	2.45957	5e-05	0.000327342	yes	coding	/
AUR62031404-RA	0h	24h	OK	153.282	7.74865	-4.3061	-5.88951	5e-05	0.000327342	yes	coding	/
AUR62031406-RA	0h	24h	OK	342.205	32.053	-3.41633	-7.13985	5e-05	0.000327342	yes	coding	/
AUR62031420-RA	0h	24h	OK	5.26765	18.6078	1.82067	2.12535	0.0016	0.00908395	yes	coding	/
AUR62031449-RA	0h	24h	OK	76.9276	30.0034	-1.35838	-2.68606	0.0001	0.000607975	yes	coding	/
AUR62031461-RA	0h	24h	OK	78.9572	35.6869	-1.14568	-2.01991	0.00185	0.0104669	yes	coding	/
AUR62031505-RA	0h	24h	OK	12.5513	3.27717	-1.93731	-2.05285	0.00435	0.0236443	yes	coding	/
AUR62031524-RA	0h	24h	OK	42.476	13.6965	-1.63284	-2.33421	0.00085	0.00489598	yes	coding	/
AUR62031575-RA	0h	24h	OK	6.87598	2.26683	-1.60089	-1.78223	0.0061	0.0327002	yes	coding	/
AUR62031639-RA	0h	24h	OK	179.012	53.2219	-1.74997	-3.08325	5e-05	0.000327342	yes	coding	/
AUR62031661-RA	0h	24h	OK	14.8566	53.5013	1.84847	2.19161	0.00765	0.0405751	yes	coding	/
AUR62031768-RA	0h	24h	OK	30.8068	95.0639	1.62565	3.59621	5e-05	0.000327342	yes	coding	/
AUR62031769-RA	0h	24h	OK	3.88579	0	#NAME?	#NAME?	0.00025	0.00147346	yes	coding	/
AUR62031771-RA	0h	24h	OK	387.308	153.009	-1.33986	-3.17581	5e-05	0.000327342	yes	coding	/
AUR62031792-RA	0h	24h	OK	47.5168	6.82963	-2.79856	-3.2568	0.0001	0.000607975	yes	coding	/
AUR62031798-RA	0h	24h	OK	246.651	118.088	-1.06261	-2.54347	5e-05	0.000327342	yes	coding	/
AUR62031820-RA	0h	24h	OK	10.8446	2.39393	-2.17953	-3.37098	5e-05	0.000327342	yes	coding	/
AUR62031824-RA	0h	24h	OK	3.88925	37.3949	3.26528	4.47311	5e-05	0.000327342	yes	coding	/
AUR62031826-RA	0h	24h	OK	12.4349	5.27734	-1.23652	-1.97517	0.0022	0.0123893	yes	coding	/
AUR62031907-RA	0h	24h	OK	2.22391	0	#NAME?	#NAME?	5e-05	0.000327342	yes	coding	/
AUR62032014-RA	0h	24h	OK	11.3573	25.8846	1.18847	2.31496	5e-05	0.000327342	yes	coding	/
AUR62032029-RA	0h	24h	OK	141.288	60.0525	-1.23434	-2.93228	5e-05	0.000327342	yes	coding	/
AUR62032036-RA	0h	24h	OK	39.4949	246.547	2.64212	4.78311	5e-05	0.000327342	yes	coding	/
AUR62032096-RA	0h	24h	OK	61.2649	14.7637	-2.05301	-2.92304	5e-05	0.000327342	yes	coding	/
AUR62032119-RA	0h	24h	OK	465.722	133.376	-1.80397	-4.23467	5e-05	0.000327342	yes	coding	/
AUR62032159-RA	0h	24h	OK	179.069	62.2392	-1.52462	-2.65162	5e-05	0.000327342	yes	coding	/
AUR62032179-RA	0h	24h	OK	20.1051	3.41567	-2.55732	-2.71294	0.00015	0.000893574	yes	coding	/
AUR62032217-RA	0h	24h	OK	31.9095	12.3125	-1.37387	-2.98732	5e-05	0.000327342	yes	coding	/
AUR62032218-RA	0h	24h	OK	18.1734	8.53892	-1.0897	-2.12585	0.00065	0.00376631	yes	coding	/
AUR62032238-RA	0h	24h	OK	435.516	172.088	-1.33958	-1.89934	0.00145	0.0082515	yes	coding	/
AUR62032264-RA	0h	24h	OK	35.6162	15.466	-1.20344	-2.15747	0.00065	0.00376631	yes	coding	/
AUR62032356-RA	0h	24h	OK	77.2329	17.5195	-2.14025	-4.07842	5e-05	0.000327342	yes	coding	/
AUR62032401-RA	0h	24h	OK	60.8207	23.8891	-1.34821	-2.36878	0.0001	0.000607975	yes	coding	/
AUR62032517-RA	0h	24h	OK	46.2129	17.7856	-1.37758	-3.07155	5e-05	0.000327342	yes	coding	/
AUR62032524-RA	0h	24h	OK	0.782362	10.8292	3.79095	2.66774	0.00295	0.0164629	yes	coding	/
AUR62032526-RA	0h	24h	OK	159.221	36.7703	-2.11441	-4.7281	5e-05	0.000327342	yes	coding	/
AUR62032541-RA	0h	24h	OK	0.521487	16.1061	4.94883	3.30351	0.0002	0.00118357	yes	coding	/
AUR62032546-RA	0h	24h	OK	16.7418	8.26654	-1.0181	-1.67613	0.0073	0.0388017	yes	coding	/
AUR62032547-RA	0h	24h	OK	18.8606	39.7855	1.07687	2.01516	0.0008	0.00461507	yes	coding	/
AUR62032606-RA	0h	24h	OK	2.61144	9.34584	1.83948	2.42874	0.0005	0.00290939	yes	coding	/
AUR62032612-RA	0h	24h	OK	1.97776	0	#NAME?	#NAME?	5e-05	0.000327342	yes	coding	/
AUR62032630-RA	0h	24h	OK	120.464	51.3756	-1.22944	-2.58248	5e-05	0.000327342	yes	coding	/
AUR62032642-RA	0h	24h	OK	503.85	65.6011	-2.9412	-6.74484	5e-05	0.000327342	yes	coding	/
AUR62032655-RA	0h	24h	OK	17.4756	4.36747	-2.00047	-2.1486	0.00235	0.01321	yes	coding	/
AUR62032724-RA	0h	24h	OK	21.4253	8.29548	-1.36892	-2.1508	0.0007	0.00404934	yes	coding	/
AUR62032727-RA	0h	24h	OK	263.879	88.2211	-1.58068	-3.62543	5e-05	0.000327342	yes	coding	/
AUR62032788-RA	0h	24h	OK	38.0301	2.85684	-3.73465	-3.61376	0.0001	0.000607975	yes	coding	/
AUR62032790-RA	0h	24h	OK	58.0827	9.5803	-2.59997	-3.85403	5e-05	0.000327342	yes	coding	/
AUR62032791-RA	0h	24h	OK	97.7795	15.6255	-2.64563	-4.43701	5e-05	0.000327342	yes	coding	/
AUR62032816-RA	0h	24h	OK	2.93247	168.425	5.84385	6.55736	5e-05	0.000327342	yes	coding	/
AUR62032824-RA	0h	24h	OK	21.5566	7.00372	-1.62194	-2.74132	5e-05	0.000327342	yes	coding	/
AUR62032848-RA	0h	24h	OK	9.48591	2.16448	-2.13177	-2.05853	0.00335	0.0183629	yes	coding	/
AUR62032850-RA	0h	24h	OK	4.98406	22.1175	2.14979	1.85103	0.0018	0.0101886	yes	coding	/
AUR62032864-RA	0h	24h	OK	37.5553	8.50898	-2.14196	-4.49709	5e-05	0.000327342	yes	coding	/
AUR62032876-RA	0h	24h	OK	85.1552	36.1341	-1.23673	-2.35556	5e-05	0.000327342	yes	coding	/
AUR62032889-RA	0h	24h	OK	207.648	82.2756	-1.33561	-3.05797	5e-05	0.000327342	yes	coding	/
AUR62032970-RA	0h	24h	OK	93.7618	30.5569	-1.6175	-3.66871	5e-05	0.000327342	yes	coding	/
AUR62032996-RA	0h	24h	OK	6.45339	27.7333	2.10349	2.77977	5e-05	0.000327342	yes	coding	/
AUR62033023-RA	0h	24h	OK	36.8548	7.23548	-2.34869	-2.5007	0.0032	0.0178002	yes	coding	/
AUR62033026-RA	0h	24h	OK	30.1607	6.45613	-2.22393	-4.11013	5e-05	0.000327342	yes	coding	/
AUR62033121-RA	0h	24h	OK	7.06164	37.3597	2.40341	2.96348	5e-05	0.000327342	yes	coding	/
AUR62033162-RA	0h	24h	OK	214.388	533.471	1.31518	3.13586	5e-05	0.000327342	yes	coding	/
AUR62033177-RA	0h	24h	OK	118.568	32.1855	-1.88124	-3.73769	5e-05	0.000327342	yes	coding	/
AUR62033179-RA	0h	24h	OK	101.021	45.7339	-1.14332	-2.24888	0.00015	0.000893574	yes	coding	/
AUR62033235-RA	0h	24h	OK	10.314	0.971917	-3.40762	-3.24379	5e-05	0.000327342	yes	coding	/
AUR62033236-RA	0h	24h	OK	289.445	53.684	-2.43073	-5.42457	5e-05	0.000327342	yes	coding	/
AUR62033248-RA	0h	24h	OK	53.2753	24.3315	-1.13064	-2.1853	0.00015	0.000893574	yes	coding	/
AUR62033275-RA	0h	24h	OK	79.5142	31.2626	-1.34678	-3.18946	5e-05	0.000327342	yes	coding	/
AUR62033297-RA	0h	24h	OK	26.8082	8.39326	-1.67537	-2.47867	0.0003	0.00176267	yes	coding	/
AUR62033302-RA	0h	24h	OK	7.8307	23.4912	1.5849	2.16097	0.0007	0.00404934	yes	coding	/
AUR62033373-RA	0h	24h	OK	14.9338	3.11206	-2.26264	-4.03644	5e-05	0.000327342	yes	coding	/
AUR62033456-RA	0h	24h	OK	41.1771	16.8467	-1.28938	-2.72152	5e-05	0.000327342	yes	coding	/
AUR62033472-RA	0h	24h	OK	23.2872	64.62	1.47244	1.74927	0.00385	0.0210115	yes	coding	/
AUR62033531-RA	0h	24h	OK	104.963	35.3569	-1.56982	-3.59457	5e-05	0.000327342	yes	coding	/
AUR62033539-RA	0h	24h	OK	25.2471	4.48385	-2.49331	-2.61094	5e-05	0.000327342	yes	coding	/
AUR62033562-RA	0h	24h	OK	859.256	237.367	-1.85597	-3.76634	5e-05	0.000327342	yes	coding	/
AUR62033602-RA	0h	24h	OK	25.5544	4.98675	-2.3574	-4.04516	5e-05	0.000327342	yes	coding	/
AUR62033604-RA	0h	24h	OK	3.03491	0.392337	-2.95149	-1.88702	0.00635	0.0339884	yes	coding	/
AUR62033605-RA	0h	24h	OK	25.1094	334.738	3.73674	7.96612	5e-05	0.000327342	yes	coding	/
AUR62033617-RA	0h	24h	OK	178.608	38.4244	-2.2167	-1.72505	0.0056	0.030117	yes	coding	/
AUR62033641-RA	0h	24h	OK	67.7466	8.57734	-2.98155	-4.55678	5e-05	0.000327342	yes	coding	/
AUR62033684-RA	0h	24h	OK	9.71799	19.8504	1.03044	1.58105	0.00785	0.0415703	yes	coding	/
AUR62033696-RA	0h	24h	OK	29.3696	7.88065	-1.89793	-1.95361	0.0022	0.0123893	yes	coding	/
AUR62033708-RA	0h	24h	OK	5.64429	11.3515	1.00802	1.69409	0.0055	0.0295989	yes	coding	/
AUR62033738-RA	0h	24h	OK	506.87	156.903	-1.69174	-3.88398	5e-05	0.000327342	yes	coding	/
AUR62033773-RA	0h	24h	OK	8.73147	0.897972	-3.28148	-2.4368	0.0028	0.0156529	yes	coding	/
AUR62033881-RA	0h	24h	OK	20.0653	8.0665	-1.31469	-2.12115	0.0007	0.00404934	yes	coding	/
AUR62033883-RA	0h	24h	OK	36.1561	8.99463	-2.0071	-3.66002	5e-05	0.000327342	yes	coding	/
AUR62033898-RA	0h	24h	OK	6.31201	15.0628	1.25482	2.22187	0.00025	0.00147346	yes	coding	/
AUR62033900-RA	0h	24h	OK	104.064	11.0679	-3.23303	-4.02818	5e-05	0.000327342	yes	coding	/
AUR62033906-RA	0h	24h	OK	14.76	43.2239	1.55014	2.88344	5e-05	0.000327342	yes	coding	/
AUR62033914-RA	0h	24h	OK	541.428	164.632	-1.71753	-3.52488	5e-05	0.000327342	yes	noncoding	LncRNA
AUR62033939-RA	0h	24h	OK	17.7584	70.7863	1.99497	3.44106	5e-05	0.000327342	yes	coding	/
AUR62034046-RA	0h	24h	OK	785.113	259.36	-1.59794	-3.60062	5e-05	0.000327342	yes	coding	/
AUR62034062-RA	0h	24h	OK	16.4435	7.1428	-1.20296	-2.06922	0.00095	0.00545853	yes	coding	/
AUR62034097-RA	0h	24h	OK	6.87305	2.85419	-1.26787	-1.86264	0.0027	0.0151148	yes	coding	/
AUR62034115-RA	0h	24h	OK	38.8864	9.08864	-2.09713	-3.86721	5e-05	0.000327342	yes	coding	/
AUR62034136-RA	0h	24h	OK	6.15316	1.15372	-2.41503	-2.69576	0.00035	0.00204936	yes	coding	/
AUR62034159-RA	0h	24h	OK	20.1442	4.13498	-2.28441	-2.80308	5e-05	0.000327342	yes	coding	/
AUR62034163-RA	0h	24h	OK	123.137	59.4506	-1.0505	-2.44967	5e-05	0.000327342	yes	coding	/
AUR62034188-RA	0h	24h	OK	3.1114	26.5424	3.09266	2.40996	0.00495	0.0267865	yes	coding	/
AUR62034226-RA	0h	24h	OK	106.744	37.9884	-1.49053	-3.30518	5e-05	0.000327342	yes	coding	/
AUR62034227-RA	0h	24h	OK	16.0512	5.85254	-1.45554	-1.88311	0.00745	0.0395651	yes	coding	/
AUR62034285-RA	0h	24h	OK	4.1196	1.34006	-1.62021	-1.64006	0.00775	0.0410637	yes	coding	/
AUR62034297-RA	0h	24h	OK	58.1564	274.317	2.23783	3.12031	5e-05	0.000327342	yes	coding	/
AUR62034299-RA	0h	24h	OK	16.1428	3.36811	-2.26088	-2.53554	0.0004	0.00233755	yes	coding	/
AUR62034332-RA	0h	24h	OK	329.636	107.169	-1.62098	-3.32673	5e-05	0.000327342	yes	coding	/
AUR62034389-RA	0h	24h	OK	22.8959	0.885701	-4.69213	-4.14979	0.00015	0.000893574	yes	coding	/
AUR62034394-RA	0h	24h	OK	2.25749	0.85834	-1.3951	-1.51758	0.0094	0.0493604	yes	coding	/
AUR62034431-RA	0h	24h	OK	27.6992	5.35411	-2.37113	-3.37102	5e-05	0.000327342	yes	coding	/
AUR62034435-RA	0h	24h	OK	3.04132	29.2871	3.2675	3.48947	5e-05	0.000327342	yes	coding	/
AUR62034523-RA	0h	24h	OK	0.654182	5.18157	2.98562	1.77853	0.0077	0.0408202	yes	coding	/
AUR62034548-RA	0h	24h	OK	128.043	30.0448	-2.09144	-4.72054	5e-05	0.000327342	yes	coding	/
AUR62034553-RA	0h	24h	OK	27.3076	7.82156	-1.80378	-3.90941	5e-05	0.000327342	yes	coding	/
AUR62034575-RA	0h	24h	OK	25.2865	9.783	-1.37002	-1.94561	0.00365	0.0199551	yes	coding	/
AUR62034593-RA	0h	24h	OK	150.833	59.023	-1.3536	-2.80796	5e-05	0.000327342	yes	coding	/
AUR62034634-RA	0h	24h	OK	7.99903	37.3203	2.22206	3.62729	5e-05	0.000327342	yes	coding	/
AUR62034681-RA	0h	24h	OK	31.5341	82.9293	1.39497	2.95142	5e-05	0.000327342	yes	coding	/
AUR62034683-RA	0h	24h	OK	29.6415	110.189	1.89429	3.97101	5e-05	0.000327342	yes	coding	/
AUR62034781-RA	0h	24h	OK	9.95744	2.73997	-1.86162	-2.62999	0.0002	0.00118357	yes	coding	/
AUR62034784-RA	0h	24h	OK	18.9653	5.04023	-1.9118	-3.06401	5e-05	0.000327342	yes	coding	/
AUR62034789-RA	0h	24h	OK	2.42183	24.9077	3.36242	2.4891	0.00165	0.00935992	yes	coding	/
AUR62034831-RA	0h	24h	OK	38.7062	8.88988	-2.12233	-3.93916	5e-05	0.000327342	yes	coding	/
AUR62034833-RA	0h	24h	OK	3.90229	0	#NAME?	#NAME?	5e-05	0.000327342	yes	coding	/
AUR62034888-RA	0h	24h	OK	10.9819	22.9295	1.06208	1.79278	0.00255	0.0142979	yes	coding	/
AUR62034957-RA	0h	24h	OK	11.2916	4.32081	-1.38588	-1.70543	0.00755	0.040075	yes	coding	/
AUR62034965-RA	0h	24h	OK	48.6133	14.1416	-1.7814	-2.49188	0.0008	0.00461507	yes	coding	/
AUR62035012-RA	0h	24h	OK	40.8188	86.7819	1.08816	2.16152	0.00035	0.00204936	yes	coding	/
AUR62035028-RA	0h	24h	OK	20.3737	76.7353	1.91318	3.72803	5e-05	0.000327342	yes	coding	/
AUR62035048-RA	0h	24h	OK	236.846	621.044	1.39075	3.3276	5e-05	0.000327342	yes	coding	/
AUR62035051-RA	0h	24h	OK	19.5117	8.80856	-1.14736	-2.1462	0.0009	0.00517825	yes	coding	/
AUR62035060-RA	0h	24h	OK	215.385	77.7059	-1.47082	-2.24696	0.0003	0.00176267	yes	coding	/
AUR62035083-RA	0h	24h	OK	13.4141	3.68203	-1.86517	-2.21372	0.00085	0.00489598	yes	coding	/
AUR62035089-RA	0h	24h	OK	35.4431	16.6778	-1.08758	-2.32764	5e-05	0.000327342	yes	coding	/
AUR62035166-RA	0h	24h	OK	70.014	26.8897	-1.38059	-2.96304	5e-05	0.000327342	yes	coding	/
AUR62035185-RA	0h	24h	OK	60.374	27.9738	-1.10985	-1.93571	0.00105	0.00602046	yes	coding	/
AUR62035231-RA	0h	24h	OK	3.08044	24.3178	2.98081	3.2885	5e-05	0.000327342	yes	coding	/
AUR62035260-RA	0h	24h	OK	15.6814	43.3263	1.46619	2.25062	0.00035	0.00204936	yes	coding	/
AUR62035301-RA	0h	24h	OK	19.2394	9.55218	-1.01016	-1.8839	0.0019	0.0107415	yes	coding	/
AUR62035385-RA	0h	24h	OK	59.6513	22.5661	-1.4024	-2.77214	5e-05	0.000327342	yes	coding	/
AUR62035399-RA	0h	24h	OK	56.1592	10.7448	-2.38588	-3.46711	5e-05	0.000327342	yes	coding	/
AUR62035501-RA	0h	24h	OK	2.58543	7.91848	1.61482	1.94033	0.0046	0.0249485	yes	coding	/
AUR62035516-RA	0h	24h	OK	7.50218	2.64255	-1.50538	-2.03044	0.0074	0.0393112	yes	coding	/
AUR62035593-RA	0h	24h	OK	67.5724	33.7115	-1.00319	-2.14608	0.0003	0.00176267	yes	coding	/
AUR62035677-RA	0h	24h	OK	1.27151	7.62933	2.58501	2.37002	0.0018	0.0101886	yes	coding	/
AUR62035683-RA	0h	24h	OK	14.2675	7.10413	-1.006	-1.82805	0.0025	0.0140249	yes	coding	/
AUR62035747-RA	0h	24h	OK	22.4318	6.17937	-1.86001	-2.67275	5e-05	0.000327342	yes	coding	/
AUR62035817-RA	0h	24h	OK	6.2357	26.8456	2.10606	3.14656	5e-05	0.000327342	yes	coding	/
AUR62035909-RA	0h	24h	OK	92.7443	31.5795	-1.55427	-2.92906	5e-05	0.000327342	yes	coding	/
AUR62035931-RA	0h	24h	OK	12.1129	1.71879	-2.81708	-2.8569	0.00095	0.00545853	yes	coding	/
AUR62035973-RA	0h	24h	OK	16.4848	6.38538	-1.36829	-2.30277	5e-05	0.000327342	yes	coding	/
AUR62036002-RA	0h	24h	OK	133.529	52.3327	-1.35137	-3.25356	5e-05	0.000327342	yes	coding	/
AUR62036034-RA	0h	24h	OK	29.5265	13.4789	-1.13131	-2.20222	0.0003	0.00176267	yes	coding	/
AUR62036052-RA	0h	24h	OK	50.6258	19.3	-1.39127	-2.92006	5e-05	0.000327342	yes	coding	/
AUR62036092-RA	0h	24h	OK	47.2896	3.93844	-3.58583	-4.04241	5e-05	0.000327342	yes	coding	/
AUR62036097-RA	0h	24h	OK	349.807	91.622	-1.93279	-4.60101	5e-05	0.000327342	yes	coding	/
AUR62036106-RA	0h	24h	OK	70.445	13.1605	-2.42028	-4.6404	5e-05	0.000327342	yes	coding	/
AUR62036146-RA	0h	24h	OK	12.7116	29.4986	1.2145	1.79134	0.00385	0.0210115	yes	coding	/
AUR62036183-RA	0h	24h	OK	410.687	79.0273	-2.37762	-5.54102	5e-05	0.000327342	yes	coding	/
AUR62036199-RA	0h	24h	OK	9.85188	2.90856	-1.76009	-1.941	0.00285	0.0159247	yes	coding	/
AUR62036204-RA	0h	24h	OK	97.511	6.47965	-3.91158	-4.4879	5e-05	0.000327342	yes	coding	/
AUR62036206-RA	0h	24h	OK	49.4428	15.9147	-1.63541	-3.01001	5e-05	0.000327342	yes	coding	/
AUR62036224-RA	0h	24h	OK	33.7551	131.442	1.96125	4.2046	5e-05	0.000327342	yes	coding	/
AUR62036239-RA	0h	24h	OK	20.343	65.7473	1.6924	3.19864	5e-05	0.000327342	yes	coding	/
AUR62036249-RA	0h	24h	OK	36.0051	17.2815	-1.05898	-1.99349	0.001	0.00573806	yes	coding	/
AUR62036271-RA	0h	24h	OK	3.35749	12.4758	1.89368	1.60324	0.00905	0.0476015	yes	coding	/
AUR62036281-RA	0h	24h	OK	43.2713	8.12815	-2.41241	-2.18912	0.00155	0.00880597	yes	coding	/
AUR62036284-RA	0h	24h	OK	336.669	155.361	-1.11571	-2.52728	5e-05	0.000327342	yes	coding	/
AUR62036285-RA	0h	24h	OK	12.4152	875.175	6.1394	10.2779	5e-05	0.000327342	yes	coding	/
AUR62036372-RA	0h	24h	OK	7.00643	23.2725	1.73188	3.32985	5e-05	0.000327342	yes	coding	/
AUR62036384-RA	0h	24h	OK	26.0832	7.23753	-1.84955	-3.64284	5e-05	0.000327342	yes	coding	/
AUR62036411-RA	0h	24h	OK	28.4144	10.4525	-1.44278	-1.81351	0.0033	0.0181073	yes	coding	/
AUR62036437-RA	0h	24h	OK	25.0527	2.1023	-3.57492	-3.42856	5e-05	0.000327342	yes	coding	/
AUR62036500-RA	0h	24h	OK	274.29	92.2943	-1.57139	-3.70617	5e-05	0.000327342	yes	coding	/
AUR62036503-RA	0h	24h	OK	13.2715	4.31704	-1.62022	-2.0423	0.00115	0.00657841	yes	coding	/
AUR62036527-RA	0h	24h	OK	2.38642	11.2856	2.24156	2.29715	0.001	0.00573806	yes	coding	/
AUR62036595-RA	0h	24h	OK	1.50688	9.83713	2.70667	1.77626	0.0095	0.0498677	yes	coding	/
AUR62036616-RA	0h	24h	OK	5.62368	11.8366	1.07367	1.64804	0.00695	0.0370439	yes	coding	/
AUR62036624-RA	0h	24h	OK	5.41429	31.6903	2.5492	2.04208	0.00025	0.00147346	yes	coding	/
AUR62036630-RA	0h	24h	OK	60.4324	9.46307	-2.67494	-3.34998	0.0001	0.000607975	yes	coding	/
AUR62036645-RA	0h	24h	OK	4.21968	18.2284	2.11098	2.2181	0.0027	0.0151148	yes	coding	/
AUR62036667-RA	0h	24h	OK	14.1548	4.74045	-1.57819	-1.96621	0.00155	0.00880597	yes	coding	/
AUR62036675-RA	0h	24h	OK	231.44	86.0115	-1.42804	-2.99303	5e-05	0.000327342	yes	coding	/
AUR62036697-RA	0h	24h	OK	59.0232	22.954	-1.36254	-2.31608	0.0006	0.00348122	yes	coding	/
AUR62036698-RA	0h	24h	OK	51.85	16.3175	-1.66792	-2.38979	0.00525	0.0283319	yes	coding	/
AUR62036720-RA	0h	24h	OK	21.1491	8.60465	-1.29741	-1.92391	0.00245	0.0137549	yes	coding	/
AUR62036721-RA	0h	24h	OK	2.25141	0	#NAME?	#NAME?	0.0002	0.00118357	yes	coding	/
AUR62036832-RA	0h	24h	OK	1.47979	14.4799	3.29059	2.96511	0.0002	0.00118357	yes	coding	/
AUR62036841-RA	0h	24h	OK	35.694	12.4749	-1.51666	-2.6596	5e-05	0.000327342	yes	coding	/
AUR62036843-RA	0h	24h	OK	9.64286	3.757	-1.35988	-2.11078	0.00065	0.00376631	yes	coding	/
AUR62036889-RA	0h	24h	OK	5.48134	45.8289	3.06366	2.95682	0.0005	0.00290939	yes	coding	/
AUR62036899-RA	0h	24h	OK	769.574	237.788	-1.69438	-3.8188	5e-05	0.000327342	yes	coding	/
AUR62036915-RA	0h	24h	OK	96.8119	31.7604	-1.60796	-1.85671	0.00515	0.0278137	yes	coding	/
AUR62036924-RA	0h	24h	OK	13.3123	6.24739	-1.09144	-1.59576	0.00875	0.0461183	yes	coding	/
AUR62036970-RA	0h	24h	OK	137.657	60.2651	-1.19168	-2.52814	5e-05	0.000327342	yes	coding	/
AUR62037008-RA	0h	24h	OK	1127.39	356.727	-1.66009	-3.95941	5e-05	0.000327342	yes	coding	/
AUR62037102-RA	0h	24h	OK	141.085	69.1196	-1.02939	-2.45464	5e-05	0.000327342	yes	coding	/
AUR62037132-RA	0h	24h	OK	592.965	286.005	-1.05191	-2.37716	5e-05	0.000327342	yes	coding	/
AUR62037141-RA	0h	24h	OK	49.7967	17.7606	-1.48737	-2.92673	5e-05	0.000327342	yes	coding	/
AUR62037161-RA	0h	24h	OK	36.1335	8.70368	-2.05364	-2.49159	0.00095	0.00545853	yes	coding	/
AUR62037164-RA	0h	24h	OK	569.171	186.562	-1.60921	-3.31951	5e-05	0.000327342	yes	coding	/
AUR62037171-RA	0h	24h	OK	8.73202	3.70228	-1.2379	-1.84724	0.0045	0.0244308	yes	coding	/
AUR62037172-RA	0h	24h	OK	359.049	166.5	-1.10866	-2.65223	5e-05	0.000327342	yes	coding	/
AUR62037200-RA	0h	24h	OK	58.0253	20.4851	-1.5021	-3.30898	5e-05	0.000327342	yes	coding	/
AUR62037213-RA	0h	24h	OK	9.67892	20.0834	1.05309	1.66963	0.00525	0.0283319	yes	coding	/
AUR62037361-RA	0h	24h	OK	33.1383	6.93757	-2.256	-3.4939	5e-05	0.000327342	yes	coding	/
AUR62037366-RA	0h	24h	OK	680.234	14.6754	-5.53456	-9.44959	5e-05	0.000327342	yes	coding	/
AUR62037417-RA	0h	24h	OK	24.9165	5.52074	-2.17417	-2.95373	5e-05	0.000327342	yes	coding	/
AUR62037443-RA	0h	24h	OK	4.16206	0	#NAME?	#NAME?	5e-05	0.000327342	yes	coding	/
AUR62037507-RA	0h	24h	OK	71.5135	34.5132	-1.05107	-2.17453	0.0002	0.00118357	yes	coding	/
AUR62037554-RA	0h	24h	OK	13.9234	34.0957	1.29208	1.98077	0.00085	0.00489598	yes	coding	/
AUR62037563-RA	0h	24h	OK	10.0639	2.93689	-1.77683	-2.3426	0.00065	0.00376631	yes	coding	/
AUR62037593-RA	0h	24h	OK	23.6344	77.8447	1.71971	2.89063	5e-05	0.000327342	yes	coding	/
AUR62037644-RA	0h	24h	OK	36.1248	13.5977	-1.40963	-2.69071	5e-05	0.000327342	yes	coding	/
AUR62037662-RA	0h	24h	OK	10.9787	5.43811	-1.01353	-1.51541	0.00935	0.0491074	yes	coding	/
AUR62037715-RA	0h	24h	OK	189.456	65.0638	-1.54194	-3.51765	5e-05	0.000327342	yes	coding	/
AUR62037730-RA	0h	24h	OK	39.8106	17.4714	-1.18815	-2.38482	5e-05	0.000327342	yes	coding	/
AUR62037764-RA	0h	24h	OK	21.6419	6.25945	-1.78972	-2.90786	5e-05	0.000327342	yes	coding	/
AUR62037766-RA	0h	24h	OK	22.2069	4.0136	-2.46804	-2.20296	0.0053	0.0285903	yes	coding	/
AUR62037782-RA	0h	24h	OK	65.6644	11.6551	-2.49415	-3.22999	0.00015	0.000893574	yes	coding	/
AUR62037809-RA	0h	24h	OK	35.5915	139.285	1.96843	4.05922	5e-05	0.000327342	yes	coding	/
AUR62037811-RA	0h	24h	OK	52.2221	134.13	1.3609	2.95783	5e-05	0.000327342	yes	coding	/
AUR62037821-RA	0h	24h	OK	235.69	96.277	-1.29162	-3.09431	5e-05	0.000327342	yes	coding	/
AUR62037835-RA	0h	24h	OK	26.0485	11.3132	-1.20319	-2.06599	0.00065	0.00376631	yes	coding	/
AUR62037855-RA	0h	24h	OK	37.4242	14.2838	-1.38959	-2.04544	0.00185	0.0104669	yes	coding	/
AUR62037869-RA	0h	24h	OK	44.0978	20.0591	-1.13645	-2.54907	5e-05	0.000327342	yes	coding	/
AUR62037896-RA	0h	24h	OK	24.5026	3.20545	-2.93433	-4.29386	5e-05	0.000327342	yes	coding	/
AUR62037900-RA	0h	24h	OK	111.398	53.061	-1.06999	-2.58298	5e-05	0.000327342	yes	coding	/
AUR62037907-RA	0h	24h	OK	11.0808	25.899	1.22483	1.86133	0.0013	0.00741411	yes	coding	/
AUR62037925-RA	0h	24h	OK	11.0903	4.81329	-1.2042	-1.74622	0.00735	0.0390597	yes	coding	/
AUR62037935-RA	0h	24h	OK	0.637544	4.51643	2.82459	2.23444	0.004	0.0218036	yes	coding	/
AUR62037941-RA	0h	24h	OK	3.54223	19.9783	2.4957	2.29894	0.00285	0.0159247	yes	coding	/
AUR62038006-RA	0h	24h	OK	160.481	44.6162	-1.84677	-4.32633	5e-05	0.000327342	yes	coding	/
AUR62038010-RA	0h	24h	OK	82.3913	12.9121	-2.67377	-2.74899	0.00655	0.0350078	yes	coding	/
AUR62038013-RA	0h	24h	OK	15.9486	7.90013	-1.01348	-1.72334	0.00545	0.0293396	yes	coding	/
AUR62038032-RA	0h	24h	OK	940.538	216.479	-2.11926	-4.7822	5e-05	0.000327342	yes	coding	/
AUR62038099-RA	0h	24h	OK	46.1719	18.7718	-1.29845	-2.29674	0.0007	0.00404934	yes	coding	/
AUR62038130-RA	0h	24h	OK	1.15559	9.31451	3.01085	2.11317	0.0078	0.0413191	yes	coding	/
AUR62038183-RA	0h	24h	OK	244.902	74.2469	-1.7218	-2.45704	0.0014	0.00797175	yes	coding	/
AUR62038203-RA	0h	24h	OK	4.49738	33.4024	2.89279	2.87972	5e-05	0.000327342	yes	coding	/
AUR62038220-RA	0h	24h	OK	7.44007	2.46203	-1.59547	-2.15717	0.0005	0.00290939	yes	coding	/
AUR62038224-RA	0h	24h	OK	15.9485	3.84759	-2.05139	-2.97942	5e-05	0.000327342	yes	coding	/
AUR62038236-RA	0h	24h	OK	19.7409	7.14809	-1.46556	-2.20838	0.00065	0.00376631	yes	coding	/
AUR62038254-RA	0h	24h	OK	3.33174	11.988	1.84724	2.19301	0.00125	0.00713476	yes	coding	/
AUR62038272-RA	0h	24h	OK	184.047	45.2457	-2.02422	-4.31476	5e-05	0.000327342	yes	coding	/
AUR62038284-RA	0h	24h	OK	85.5923	39.4148	-1.11874	-2.41981	0.0001	0.000607975	yes	coding	/
AUR62038289-RA	0h	24h	OK	87.748	32.8043	-1.41948	-3.31626	5e-05	0.000327342	yes	coding	/
AUR62038310-RA	0h	24h	OK	11.388	2.84831	-1.99934	-3.07995	5e-05	0.000327342	yes	coding	/
AUR62038317-RA	0h	24h	OK	74.4683	8.28208	-3.16856	-3.6204	0.0009	0.00517825	yes	coding	/
AUR62038339-RA	0h	24h	OK	745.6	338.339	-1.13993	-2.70732	5e-05	0.000327342	yes	coding	/
AUR62038348-RA	0h	24h	OK	106.947	35.3252	-1.59813	-3.68355	5e-05	0.000327342	yes	coding	/
AUR62038527-RA	0h	24h	OK	644.117	145.174	-2.14954	-5.0896	5e-05	0.000327342	yes	coding	/
AUR62038591-RA	0h	24h	OK	3.84379	39.1064	3.3468	4.75733	5e-05	0.000327342	yes	coding	/
AUR62038615-RA	0h	24h	OK	47.3381	326.396	2.78555	6.3114	5e-05	0.000327342	yes	coding	/
AUR62038625-RA	0h	24h	OK	13.3436	1.33057	-3.32603	-2.1684	0.0036	0.0196911	yes	coding	/
AUR62038631-RA	0h	24h	OK	9.55745	20.4652	1.09847	2.09792	0.00065	0.00376631	yes	coding	/
AUR62038678-RA	0h	24h	OK	304.666	142.725	-1.09399	-2.58236	5e-05	0.000327342	yes	coding	/
AUR62038705-RA	0h	24h	OK	5.61229	26.0889	2.21677	3.15632	5e-05	0.000327342	yes	coding	/
AUR62038706-RA	0h	24h	OK	4.2364	1.38734	-1.61052	-1.62296	0.0089	0.0468553	yes	coding	/
AUR62038749-RA	0h	24h	OK	56.1268	26.8936	-1.06142	-2.31858	5e-05	0.000327342	yes	coding	/
AUR62038754-RA	0h	24h	OK	56.8032	5.98657	-3.24617	-5.81453	5e-05	0.000327342	yes	coding	/
AUR62038781-RA	0h	24h	OK	14.3676	6.37582	-1.17214	-1.95641	0.00105	0.00602046	yes	coding	/
AUR62038806-RA	0h	24h	OK	3.53147	0.446215	-2.98446	-2.09548	0.00495	0.0267865	yes	coding	/
AUR62038818-RA	0h	24h	OK	40.2696	14.0682	-1.51725	-2.77186	5e-05	0.000327342	yes	coding	/
AUR62038833-RA	0h	24h	OK	2.0306	0	#NAME?	#NAME?	0.0011	0.00630043	yes	coding	/
AUR62038865-RA	0h	24h	OK	39.1022	14.7868	-1.40294	-3.00316	5e-05	0.000327342	yes	coding	/
AUR62038869-RA	0h	24h	OK	187.377	61.8461	-1.59919	-3.53262	5e-05	0.000327342	yes	coding	/
AUR62038889-RA	0h	24h	OK	2.13454	19.7422	3.20929	2.93439	0.00045	0.00262489	yes	coding	/
AUR62038897-RA	0h	24h	OK	10.4654	28.7323	1.45705	2.3408	0.00025	0.00147346	yes	coding	/
AUR62038932-RA	0h	24h	OK	206.229	46.6863	-2.14317	-4.97372	5e-05	0.000327342	yes	coding	/
AUR62038936-RA	0h	24h	OK	265.041	73.5177	-1.85005	-3.9282	5e-05	0.000327342	yes	coding	/
AUR62038960-RA	0h	24h	OK	26.6269	4.76741	-2.48161	-3.02814	0.00015	0.000893574	yes	coding	/
AUR62038981-RA	0h	24h	OK	109.483	36.4007	-1.58867	-1.81761	0.0046	0.0249485	yes	coding	/
AUR62039005-RA	0h	24h	OK	142.317	44.3974	-1.68056	-3.50056	5e-05	0.000327342	yes	coding	/
AUR62039056-RA	0h	24h	OK	7.62319	20.4969	1.42694	2.72033	5e-05	0.000327342	yes	coding	/
AUR62039072-RA	0h	24h	OK	54.2621	18.2005	-1.57597	-3.1027	5e-05	0.000327342	yes	coding	/
AUR62039084-RA	0h	24h	OK	12.6804	2.56204	-2.30724	-2.1017	0.0051	0.0275593	yes	coding	/
AUR62039110-RA	0h	24h	OK	77.6278	26.1832	-1.56794	-3.66395	5e-05	0.000327342	yes	coding	/
AUR62039186-RA	0h	24h	OK	2.61888	0	#NAME?	#NAME?	5e-05	0.000327342	yes	coding	/
AUR62039203-RA	0h	24h	OK	64.7057	378.683	2.54903	5.70164	5e-05	0.000327342	yes	coding	/
AUR62039236-RA	0h	24h	OK	14.738	1.61162	-3.19296	-2.90187	0.00035	0.00204936	yes	coding	/
AUR62039237-RA	0h	24h	OK	3.53095	27.6886	2.97116	3.30043	5e-05	0.000327342	yes	coding	/
AUR62039245-RA	0h	24h	OK	49.4083	19.5286	-1.33916	-2.76867	5e-05	0.000327342	yes	coding	/
AUR62039261-RA	0h	24h	OK	36.7501	12.3185	-1.57692	-2.12152	0.0031	0.0172594	yes	coding	/
AUR62039336-RA	0h	24h	OK	2.70463	82.4804	4.93055	5.64194	5e-05	0.000327342	yes	coding	/
AUR62039364-RA	0h	24h	OK	30.2678	7.23524	-2.06467	-2.91748	5e-05	0.000327342	yes	coding	/
AUR62039376-RA	0h	24h	OK	7.65364	32.9464	2.1059	2.76869	5e-05	0.000327342	yes	coding	/
AUR62039383-RA	0h	24h	OK	55.3869	12.1927	-2.18353	-4.2448	5e-05	0.000327342	yes	coding	/
AUR62039398-RA	0h	24h	OK	4.10803	12.7458	1.63351	2.14405	0.00035	0.00204936	yes	coding	/
AUR62039424-RA	0h	24h	OK	18.1327	3.81656	-2.24825	-2.39239	0.0015	0.00852791	yes	coding	/
AUR62039431-RA	0h	24h	OK	2.74084	11.5087	2.07004	2.1309	0.0011	0.00630043	yes	coding	/
AUR62039434-RA	0h	24h	OK	16.1663	2.63136	-2.61911	-2.26546	0.00655	0.0350078	yes	coding	/
AUR62039436-RA	0h	24h	OK	36.1975	6.18992	-2.5479	-3.8659	5e-05	0.000327342	yes	coding	/
AUR62039451-RA	0h	24h	OK	7.82819	3.05358	-1.35818	-1.82514	0.0064	0.0342447	yes	coding	/
AUR62039476-RA	0h	24h	OK	27.5732	13.6462	-1.01476	-1.73011	0.00375	0.0204838	yes	coding	/
AUR62039481-RA	0h	24h	OK	176.486	52.4511	-1.75051	-4.16276	5e-05	0.000327342	yes	coding	/
AUR62039610-RA	0h	24h	OK	43.5933	13.8074	-1.65867	-2.93538	5e-05	0.000327342	yes	coding	/
AUR62039641-RA	0h	24h	OK	1246.39	212.095	-2.55497	-5.44947	5e-05	0.000327342	yes	coding	/
AUR62039661-RA	0h	24h	OK	390.818	131.992	-1.56605	-3.7217	5e-05	0.000327342	yes	coding	/
AUR62039704-RA	0h	24h	OK	8.71761	4.08542	-1.09345	-1.68831	0.00935	0.0491074	yes	coding	/
AUR62039712-RA	0h	24h	OK	797.291	378.128	-1.07623	-1.96373	0.00125	0.00713476	yes	coding	/
AUR62039721-RA	0h	24h	OK	2.56744	19.4519	2.92151	1.95588	0.0062	0.0332142	yes	coding	/
AUR62039734-RA	0h	24h	OK	11.5655	551.136	5.57451	9.21647	5e-05	0.000327342	yes	coding	/
AUR62039752-RA	0h	24h	OK	2.97959	17.9845	2.59357	2.21149	0.0007	0.00404934	yes	coding	/
AUR62039772-RA	0h	24h	OK	1.54277	0	#NAME?	#NAME?	5e-05	0.000327342	yes	coding	/
AUR62039773-RA	0h	24h	OK	35.0153	15.7678	-1.151	-2.16474	0.0002	0.00118357	yes	coding	/
AUR62039819-RA	0h	24h	OK	3.02592	0.410187	-2.88302	-2.01708	0.0074	0.0393112	yes	coding	/
AUR62039857-RA	0h	24h	OK	40.5178	160.679	1.98755	4.18308	5e-05	0.000327342	yes	coding	/
AUR62039860-RA	0h	24h	OK	1110.1	8.77003	-6.98389	-10.9143	5e-05	0.000327342	yes	coding	/
AUR62039880-RA	0h	24h	OK	96.2468	46.7328	-1.0423	-2.44493	5e-05	0.000327342	yes	coding	/
AUR62039923-RA	0h	24h	OK	12.3273	4.17727	-1.56123	-2.06225	0.0032	0.0178002	yes	coding	/
AUR62039947-RA	0h	24h	OK	833.491	41.3518	-4.33314	-6.81679	5e-05	0.000327342	yes	coding	/
AUR62039948-RA	0h	24h	OK	284.602	48.48	-2.55349	-4.89009	5e-05	0.000327342	yes	noncoding	LncRNA
AUR62039950-RA	0h	24h	OK	326.315	20.276	-4.00842	-6.55824	5e-05	0.000327342	yes	coding	/
AUR62039955-RA	0h	24h	OK	39.2909	113.654	1.53238	2.76801	5e-05	0.000327342	yes	coding	/
AUR62039975-RA	0h	24h	OK	2.25364	29.5269	3.7117	5.76537	5e-05	0.000327342	yes	coding	/
AUR62039984-RA	0h	24h	OK	62.1443	9.79031	-2.66619	-2.00505	0.00125	0.00713476	yes	coding	/
AUR62039990-RA	0h	24h	OK	8.48464	23.1145	1.44587	1.95735	0.00465	0.0252129	yes	coding	/
AUR62040015-RA	0h	24h	OK	15.9507	5.40313	-1.56175	-2.04861	0.0095	0.0498677	yes	coding	/
AUR62040083-RA	0h	24h	OK	34.8597	12.0303	-1.53489	-2.86354	5e-05	0.000327342	yes	coding	/
AUR62040086-RA	0h	24h	OK	26.2448	8.41274	-1.64138	-2.95254	5e-05	0.000327342	yes	coding	/
AUR62040159-RA	0h	24h	OK	9.60143	29.4549	1.61718	2.44082	0.00015	0.000893574	yes	coding	/
AUR62040214-RA	0h	24h	OK	23.0919	10.1286	-1.18895	-1.7388	0.00705	0.037552	yes	coding	/
AUR62040238-RA	0h	24h	OK	13.0234	3.70446	-1.81377	-1.93041	0.0049	0.026523	yes	coding	/
AUR62040240-RA	0h	24h	OK	24.5944	10.8154	-1.18524	-1.74932	0.005	0.027048	yes	coding	/
AUR62040245-RA	0h	24h	OK	154.798	44.9229	-1.78486	-3.73568	5e-05	0.000327342	yes	coding	/
AUR62040260-RA	0h	24h	OK	62.4113	31.1028	-1.00476	-2.0273	0.00075	0.00433205	yes	coding	/
AUR62040278-RA	0h	24h	OK	24.1639	11.451	-1.07737	-1.94896	0.0011	0.00630043	yes	coding	/
AUR62040284-RA	0h	24h	OK	1.74859	6.50628	1.89564	2.47201	0.0003	0.00176267	yes	coding	/
AUR62040327-RA	0h	24h	OK	12.9681	57.9575	2.16003	4.28994	5e-05	0.000327342	yes	coding	/
AUR62040335-RA	0h	24h	OK	13.2058	35.7415	1.43643	1.81115	0.0048	0.026	yes	coding	/
AUR62040362-RA	0h	24h	OK	9.36004	20.7768	1.15039	1.59039	0.0074	0.0393112	yes	coding	/
AUR62040385-RA	0h	24h	OK	3.53133	1.07955	-1.70978	-1.86215	0.00275	0.0153829	yes	coding	/
AUR62040406-RA	0h	24h	OK	11.1072	1.04984	-3.40325	-2.54628	0.0045	0.0244308	yes	coding	/
AUR62040417-RA	0h	24h	OK	4.79248	0	#NAME?	#NAME?	5e-05	0.000327342	yes	coding	/
AUR62040437-RA	0h	24h	OK	853.255	308.966	-1.46553	-3.32681	5e-05	0.000327342	yes	coding	/
AUR62040449-RA	0h	24h	OK	127.781	62.0563	-1.04202	-2.35203	0.0001	0.000607975	yes	coding	/
AUR62040470-RA	0h	24h	OK	34.6897	14.7613	-1.23269	-2.03003	0.00155	0.00880597	yes	coding	/
AUR62040488-RA	0h	24h	OK	10.5104	4.393	-1.25854	-1.86624	0.004	0.0218036	yes	coding	/
AUR62040553-RA	0h	24h	OK	8.01097	2.13173	-1.90995	-2.73976	5e-05	0.000327342	yes	coding	/
AUR62040555-RA	0h	24h	OK	3.21943	14.5953	2.18063	2.1211	0.0033	0.0181073	yes	coding	/
AUR62040563-RA	0h	24h	OK	131.924	18.5417	-2.83086	-6.19963	5e-05	0.000327342	yes	coding	/
AUR62040569-RA	0h	24h	OK	245.016	115.251	-1.08809	-2.61291	5e-05	0.000327342	yes	coding	/
AUR62040592-RA	0h	24h	OK	216.189	570.157	1.39906	2.96887	5e-05	0.000327342	yes	coding	/
AUR62040595-RA	0h	24h	OK	111.388	5780.71	5.69758	6.77952	5e-05	0.000327342	yes	coding	/
AUR62040598-RA	0h	24h	OK	2.94075	37.8269	3.68516	2.4087	0.0014	0.00797175	yes	coding	/
AUR62040618-RA	0h	24h	OK	48.3589	21.6468	-1.15963	-2.51508	5e-05	0.000327342	yes	coding	/
AUR62040631-RA	0h	24h	OK	32.1415	9.50447	-1.75776	-2.63747	5e-05	0.000327342	yes	noncoding	LncRNA
AUR62040675-RA	0h	24h	OK	505.6	204.666	-1.30473	-3.02661	5e-05	0.000327342	yes	coding	/
AUR62040679-RA	0h	24h	OK	5.56329	66.1093	3.57084	5.32526	5e-05	0.000327342	yes	coding	/
AUR62040683-RA	0h	24h	OK	55.0211	17.9388	-1.6169	-3.62575	5e-05	0.000327342	yes	coding	/
AUR62040699-RA	0h	24h	OK	23.5326	75.516	1.68212	3.6849	5e-05	0.000327342	yes	coding	/
AUR62040785-RA	0h	24h	OK	9.22698	23.1146	1.32488	2.02114	0.00085	0.00489598	yes	coding	/
AUR62040844-RA	0h	24h	OK	1.64726	48.6703	4.8849	3.45482	0.0004	0.00233755	yes	coding	/
AUR62040901-RA	0h	24h	OK	94.2006	44.1544	-1.09318	-2.61199	5e-05	0.000327342	yes	coding	/
AUR62040937-RA	0h	24h	OK	10.3515	3.40492	-1.60415	-1.64285	0.0077	0.0408202	yes	coding	/
AUR62040947-RA	0h	24h	OK	436.95	181.336	-1.2688	-2.95182	5e-05	0.000327342	yes	coding	/
AUR62040993-RA	0h	24h	OK	15.9606	3.04335	-2.39078	-2.69851	0.00115	0.00657841	yes	coding	/
AUR62041046-RA	0h	24h	OK	12.3512	3.81338	-1.6955	-2.454	0.00035	0.00204936	yes	coding	/
AUR62041078-RA	0h	24h	OK	218.25	59.9692	-1.86368	-4.38866	5e-05	0.000327342	yes	coding	/
AUR62041146-RA	0h	24h	OK	45.9926	21.787	-1.07793	-1.707	0.00465	0.0252129	yes	coding	/
AUR62041150-RA	0h	24h	OK	31.0749	93.481	1.58892	3.58414	5e-05	0.000327342	yes	coding	/
AUR62041243-RA	0h	24h	OK	2.73554	17.4113	2.67012	2.54177	0.0003	0.00176267	yes	coding	/
AUR62041279-RA	0h	24h	OK	23.1057	9.98049	-1.21107	-2.13824	0.00045	0.00262489	yes	coding	/
AUR62041284-RA	0h	24h	OK	47.0405	7.25038	-2.69778	-4.32559	5e-05	0.000327342	yes	coding	/
AUR62041395-RA	0h	24h	OK	11.6221	58.798	2.3389	3.32813	5e-05	0.000327342	yes	coding	/
AUR62041432-RA	0h	24h	OK	1628.86	512.635	-1.66786	-3.1554	5e-05	0.000327342	yes	coding	/
AUR62041447-RA	0h	24h	OK	114.311	34.2438	-1.73905	-3.63236	5e-05	0.000327342	yes	coding	/
AUR62041487-RA	0h	24h	OK	10.5791	27.0825	1.35615	2.79766	5e-05	0.000327342	yes	coding	/
AUR62041497-RA	0h	24h	OK	127.682	37.1804	-1.77994	-4.13699	5e-05	0.000327342	yes	coding	/
AUR62041509-RA	0h	24h	OK	48.8755	12.2087	-2.0012	-3.57089	5e-05	0.000327342	yes	coding	/
AUR62041510-RA	0h	24h	OK	19.8464	4.94703	-2.00424	-3.0828	5e-05	0.000327342	yes	coding	/
AUR62041654-RA	0h	24h	OK	26.5797	9.21301	-1.52858	-2.42155	0.00075	0.00433205	yes	coding	/
AUR62041716-RA	0h	24h	OK	23.7036	5.39473	-2.13549	-2.62299	0.0014	0.00797175	yes	coding	/
AUR62041791-RA	0h	24h	OK	9.62757	78.6462	3.03013	4.10121	5e-05	0.000327342	yes	coding	/
AUR62041817-RA	0h	24h	OK	242.945	82.1986	-1.56344	-3.70033	5e-05	0.000327342	yes	coding	/
AUR62041890-RA	0h	24h	OK	37.2614	11.7061	-1.67042	-2.93509	5e-05	0.000327342	yes	coding	/
AUR62041908-RA	0h	24h	OK	2.15715	9.73074	2.17342	1.98849	0.0063	0.0337275	yes	coding	/
AUR62041909-RA	0h	24h	OK	1.84808	11.6821	2.6602	2.35198	0.001	0.00573806	yes	coding	/
AUR62041917-RA	0h	24h	OK	116.657	36.7103	-1.66802	-3.19946	5e-05	0.000327342	yes	noncoding	LncRNA
AUR62041960-RA	0h	24h	OK	2.45003	6.92864	1.49977	1.74585	0.0088	0.0463637	yes	coding	/
AUR62041961-RA	0h	24h	OK	8.80573	3.1561	-1.4803	-2.24746	0.00085	0.00489598	yes	coding	/
AUR62042003-RA	0h	24h	OK	216.273	70.5988	-1.61514	-3.65139	5e-05	0.000327342	yes	coding	/
AUR62042006-RA	0h	24h	OK	15.7904	4.62722	-1.77083	-2.06863	0.0019	0.0107415	yes	coding	/
AUR62042025-RA	0h	24h	OK	4.56335	1.82997	-1.31828	-1.69876	0.0089	0.0468553	yes	coding	/
AUR62042047-RA	0h	24h	OK	2.79136	51.9054	4.21685	5.8376	5e-05	0.000327342	yes	coding	/
AUR62042086-RA	0h	24h	OK	9.8282	60.9807	2.63335	4.71023	5e-05	0.000327342	yes	coding	/
AUR62042103-RA	0h	24h	OK	5.71083	1.46697	-1.96086	-2.35855	0.00095	0.00545853	yes	coding	/
AUR62042173-RA	0h	24h	OK	1.39845	6.61749	2.24246	2.32374	0.0003	0.00176267	yes	coding	/
AUR62042267-RA	0h	24h	OK	219.052	12.9757	-4.07739	-4.94912	5e-05	0.000327342	yes	coding	/
AUR62042289-RA	0h	24h	OK	42.2731	13.9268	-1.60188	-2.79399	5e-05	0.000327342	yes	coding	/
AUR62042330-RA	0h	24h	OK	37.9971	302.74	2.99412	6.16892	5e-05	0.000327342	yes	coding	/
AUR62042331-RA	0h	24h	OK	1.39556	37.3904	4.74375	3.35724	0.00045	0.00262489	yes	coding	/
AUR62042336-RA	0h	24h	OK	0.879514	18.1922	4.37047	3.81891	5e-05	0.000327342	yes	coding	/
AUR62042339-RA	0h	24h	OK	6.45602	81.4764	3.65766	7.48	5e-05	0.000327342	yes	noncoding	LncRNA
AUR62042343-RA	0h	24h	OK	14.9738	81.7026	2.44794	2.4152	0.0006	0.00348122	yes	coding	/
AUR62042345-RA	0h	24h	OK	24.5726	85.3043	1.79557	3.92855	5e-05	0.000327342	yes	coding	/
AUR62042364-RA	0h	24h	OK	144.851	70.0041	-1.04906	-2.53733	5e-05	0.000327342	yes	coding	/
AUR62042366-RA	0h	24h	OK	73.8838	26.5296	-1.47765	-3.41139	5e-05	0.000327342	yes	coding	/
AUR62042494-RA	0h	24h	OK	15.5651	4.34786	-1.83994	-2.45351	0.0022	0.0123893	yes	coding	/
AUR62042498-RA	0h	24h	OK	16.4517	6.71378	-1.29304	-2.19499	0.00025	0.00147346	yes	coding	/
AUR62042785-RA	0h	24h	OK	230.426	547.557	1.24871	2.90944	5e-05	0.000327342	yes	noncoding	LncRNA
AUR62042799-RA	0h	24h	OK	14.8697	4.81481	-1.62683	-2.17896	0.00305	0.0169875	yes	coding	/
AUR62042818-RA	0h	24h	OK	90.0124	28.8764	-1.64023	-3.90426	5e-05	0.000327342	yes	coding	/
AUR62042823-RA	0h	24h	OK	23.0365	55.5982	1.27112	2.26218	0.0003	0.00176267	yes	coding	/
AUR62042825-RA	0h	24h	OK	32.187	138.39	2.10419	4.22669	5e-05	0.000327342	yes	coding	/
AUR62042848-RA	0h	24h	OK	8.62323	2.47028	-1.80355	-2.83369	5e-05	0.000327342	yes	coding	/
AUR62042858-RA	0h	24h	OK	12.6741	4.97686	-1.34858	-2.00637	0.00435	0.0236443	yes	coding	/
AUR62042916-RA	0h	24h	OK	17.2238	3.49663	-2.30037	-2.25252	0.00225	0.0126629	yes	coding	/
AUR62042922-RA	0h	24h	OK	118.221	54.1093	-1.12754	-2.65989	5e-05	0.000327342	yes	coding	/
AUR62042931-RA	0h	24h	OK	0.400818	17.8739	5.47876	3.43302	0.00855	0.0451069	yes	coding	/
AUR62043010-RA	0h	24h	OK	2.69459	41.1849	3.93398	2.86007	0.002	0.0112918	yes	coding	/
AUR62043029-RA	0h	24h	OK	18.2536	6.16391	-1.56626	-2.72297	5e-05	0.000327342	yes	coding	/
AUR62043048-RA	0h	24h	OK	32.5895	68.6867	1.07562	2.40635	5e-05	0.000327342	yes	coding	/
AUR62043174-RA	0h	24h	OK	20.8847	46.6498	1.15943	1.78502	0.0045	0.0244308	yes	coding	/
AUR62043190-RA	0h	24h	OK	279.137	48.4985	-2.52496	-5.63542	5e-05	0.000327342	yes	coding	/
AUR62043210-RA	0h	24h	OK	12.939	6.14825	-1.07348	-1.85739	0.00245	0.0137549	yes	coding	/
AUR62043212-RA	0h	24h	OK	25.3437	7.85673	-1.68962	-2.6591	5e-05	0.000327342	yes	coding	/
AUR62043222-RA	0h	24h	OK	45.5638	11.9677	-1.92874	-2.18464	0.0029	0.0161962	yes	coding	/
AUR62043225-RA	0h	24h	OK	16.4802	47.6504	1.53175	2.99416	5e-05	0.000327342	yes	coding	/
AUR62043274-RA	0h	24h	OK	18.8358	6.17366	-1.60928	-2.09449	0.0045	0.0244308	yes	coding	/
AUR62043297-RA	0h	24h	OK	56.1102	18.659	-1.58839	-3.48751	5e-05	0.000327342	yes	coding	/
AUR62043309-RA	0h	24h	OK	23.0317	9.31807	-1.30552	-2.61295	5e-05	0.000327342	yes	coding	/
AUR62043316-RA	0h	24h	OK	19.6313	8.31205	-1.23988	-1.64429	0.0084	0.0443504	yes	coding	/
AUR62043345-RA	0h	24h	OK	0.637622	5.31884	3.06034	2.04776	0.0063	0.0337275	yes	coding	/
AUR62043364-RA	0h	24h	OK	2.45205	15.4419	2.65478	2.04521	0.0042	0.0228529	yes	coding	/
AUR62043390-RA	0h	24h	OK	20.7859	4.60246	-2.17513	-2.85416	0.00045	0.00262489	yes	coding	/
AUR62043667-RA	0h	24h	OK	58.6451	20.9466	-1.4853	-3.1251	5e-05	0.000327342	yes	coding	/
AUR62043668-RA	0h	24h	OK	16.7665	133.724	2.99561	4.11196	5e-05	0.000327342	yes	coding	/
AUR62043777-RA	0h	24h	OK	6.83426	1.23941	-2.46314	-2.18703	0.00395	0.0215376	yes	coding	/
AUR62043797-RA	0h	24h	OK	20.9851	52.1231	1.31256	2.7273	5e-05	0.000327342	yes	coding	/
AUR62043864-RA	0h	24h	OK	11.9426	53.9941	2.17669	2.93063	0.00025	0.00147346	yes	coding	/
AUR62043868-RA	0h	24h	OK	5.26526	0	#NAME?	#NAME?	5e-05	0.000327342	yes	coding	/
AUR62043958-RA	0h	24h	OK	20.805	8.42729	-1.30379	-1.81217	0.00425	0.0231171	yes	coding	/
AUR62044150-RA	0h	24h	OK	56.1951	13.0378	-2.10774	-3.82549	5e-05	0.000327342	yes	coding	/
AUR62044178-RA	0h	24h	OK	0	2.44722	inf	#NAME?	5e-05	0.000327342	yes	coding	/
AUR62044390-RA	0h	24h	OK	16.9641	0	#NAME?	#NAME?	0.0002	0.00118357	yes	noncoding	LncRNA
AUR62044493-RA	0h	24h	OK	3.35077	0	#NAME?	#NAME?	5e-05	0.000327342	yes	coding	/
AUR62044674-RA	0h	24h	OK	0.589487	12.64	4.42239	2.84791	0.0012	0.00685616	yes	coding	/
MSTRG.100020.1	0h	24h	OK	0	4.89542	inf	#NAME?	5e-05	0.000327342	yes	noncoding	LncRNA
MSTRG.100040.1	0h	24h	OK	0	38.5156	inf	#NAME?	5e-05	0.000327342	yes	noncoding	LncRNA
MSTRG.100059.1	0h	24h	OK	0	41.1348	inf	#NAME?	5e-05	0.000327342	yes	noncoding	LncRNA
MSTRG.100074.1	0h	24h	OK	4.5182	1.40237	-1.68788	-1.534	0.0088	0.0463637	yes	coding	/
MSTRG.100094.1	0h	24h	OK	0.600928	9.81892	4.0303	2.40711	0.00225	0.0126629	yes	noncoding	LncRNA
MSTRG.100148.1	0h	24h	OK	67.9905	31.5386	-1.10822	-2.34468	5e-05	0.000327342	yes	coding	/
MSTRG.100150.1	0h	24h	OK	75.5951	31.6013	-1.25831	-2.85853	5e-05	0.000327342	yes	coding	/
MSTRG.100159.1	0h	24h	OK	28.3509	9.36612	-1.59787	-2.47629	0.0004	0.00233755	yes	coding	/
MSTRG.100167.2	0h	24h	OK	2.93593	10.0648	1.77742	1.60941	0.0091	0.0478505	yes	noncoding	LncRNA
MSTRG.100194.4	0h	24h	OK	500.758	115.062	-2.1217	-5.03899	5e-05	0.000327342	yes	coding	/
MSTRG.100213.1	0h	24h	OK	33.4483	8.9251	-1.90599	-1.83849	0.00855	0.0451069	yes	coding	/
MSTRG.100225.1	0h	24h	OK	0	9.88229	inf	#NAME?	5e-05	0.000327342	yes	noncoding	LncRNA
MSTRG.100233.1	0h	24h	OK	16.6609	36.1634	1.11806	1.93029	0.00215	0.0121157	yes	coding	/
MSTRG.100243.1	0h	24h	OK	0	3.65698	inf	#NAME?	0.0002	0.00118357	yes	noncoding	LncRNA
MSTRG.100284.1	0h	24h	OK	0	5.16495	inf	#NAME?	5e-05	0.000327342	yes	noncoding	LncRNA
MSTRG.100286.1	0h	24h	OK	59.8483	19.352	-1.62883	-2.15732	0.00675	0.0360219	yes	coding	/
MSTRG.100341.1	0h	24h	OK	0	4.42677	inf	#NAME?	5e-05	0.000327342	yes	noncoding	LncRNA
MSTRG.100360.1	0h	24h	OK	0	5.94296	inf	#NAME?	5e-05	0.000327342	yes	noncoding	LncRNA
MSTRG.100412.1	0h	24h	OK	0	20.5338	inf	#NAME?	5e-05	0.000327342	yes	noncoding	LncRNA
MSTRG.100482.2	0h	24h	OK	40.2409	12.8988	-1.64142	-2.95846	5e-05	0.000327342	yes	coding	/
MSTRG.100511.1	0h	24h	OK	0	10.8355	inf	#NAME?	5e-05	0.000327342	yes	noncoding	LncRNA
MSTRG.100516.1	0h	24h	OK	0	11.273	inf	#NAME?	5e-05	0.000327342	yes	noncoding	LncRNA
MSTRG.100770.1	0h	24h	OK	0	7.69259	inf	#NAME?	5e-05	0.000327342	yes	noncoding	LncRNA
MSTRG.10080.1	0h	24h	OK	3.96626	40.071	3.33671	3.16191	5e-05	0.000327342	yes	coding	/
MSTRG.100800.1	0h	24h	OK	15.5576	7.30076	-1.0915	-2.32066	5e-05	0.000327342	yes	coding	/
MSTRG.100807.1	0h	24h	OK	10.46	21.0159	1.00659	1.92977	0.0014	0.00797175	yes	coding	/
MSTRG.100839.1	0h	24h	OK	1.86254	11.5278	2.62977	3.72656	5e-05	0.000327342	yes	noncoding	LncRNA
MSTRG.100866.1	0h	24h	OK	0	6.89433	inf	#NAME?	5e-05	0.000327342	yes	noncoding	LncRNA
MSTRG.100884.1	0h	24h	OK	476.346	15511.6	5.0252	5.97115	5e-05	0.000327342	yes	noncoding	LncRNA
MSTRG.100950.1	0h	24h	OK	1.58238	30.6408	4.27528	3.93959	0.00015	0.000893574	yes	noncoding	LncRNA
MSTRG.100954.1	0h	24h	OK	23.8604	9.29062	-1.36077	-2.59521	5e-05	0.000327342	yes	noncoding	LncRNA
MSTRG.101011.1	0h	24h	OK	16.6907	112.35	2.75089	4.78953	5e-05	0.000327342	yes	noncoding	LncRNA
MSTRG.101065.1	0h	24h	OK	0	5.52985	inf	#NAME?	5e-05	0.000327342	yes	noncoding	LncRNA
MSTRG.101077.1	0h	24h	OK	10.9404	3.18331	-1.78106	-1.95817	0.00415	0.0225938	yes	noncoding	LncRNA
MSTRG.101089.1	0h	24h	OK	6.34497	38.5801	2.60417	2.95724	5e-05	0.000327342	yes	coding	/
MSTRG.101125.1	0h	24h	OK	4.91936	27.5187	2.48387	3.04791	0.0001	0.000607975	yes	noncoding	LncRNA
MSTRG.101135.1	0h	24h	OK	0	4.52682	inf	#NAME?	0.0001	0.000607975	yes	noncoding	LncRNA
MSTRG.101200.1	0h	24h	OK	0	8.44975	inf	#NAME?	5e-05	0.000327342	yes	noncoding	LncRNA
MSTRG.101205.1	0h	24h	OK	17.0633	5.39563	-1.66103	-2.68499	5e-05	0.000327342	yes	coding	/
MSTRG.101242.1	0h	24h	OK	1.06669	12.3072	3.5283	2.3881	0.00355	0.0194249	yes	noncoding	LncRNA
MSTRG.101244.1	0h	24h	OK	7.6942	3.22687	-1.25364	-1.96303	0.00315	0.0175305	yes	coding	/
MSTRG.101420.1	0h	24h	OK	0	6.40193	inf	#NAME?	5e-05	0.000327342	yes	noncoding	LncRNA
MSTRG.101452.1	0h	24h	OK	584.06	225.956	-1.37007	-3.18517	5e-05	0.000327342	yes	coding	/
MSTRG.10147.1	0h	24h	OK	55.924	145.234	1.37684	3.14172	5e-05	0.000327342	yes	noncoding	LncRNA
MSTRG.101547.1	0h	24h	OK	152.628	65.1667	-1.22781	-2.94352	5e-05	0.000327342	yes	coding	/
MSTRG.101556.1	0h	24h	OK	0	4.33359	inf	#NAME?	5e-05	0.000327342	yes	noncoding	LncRNA
MSTRG.101606.1	0h	24h	OK	0.768605	8.37724	3.44616	2.32603	0.004	0.0218036	yes	noncoding	LncRNA
MSTRG.101607.1	0h	24h	OK	0	32.7843	inf	#NAME?	0.0001	0.000607975	yes	noncoding	LncRNA
MSTRG.101609.1	0h	24h	OK	1.76224	38.9971	4.46789	2.98927	0.00045	0.00262489	yes	noncoding	LncRNA
MSTRG.101629.1	0h	24h	OK	0	5.34257	inf	#NAME?	5e-05	0.000327342	yes	noncoding	LncRNA
MSTRG.101663.1	0h	24h	OK	48.9904	16.2245	-1.59433	-2.78989	5e-05	0.000327342	yes	noncoding	LncRNA
MSTRG.101672.1	0h	24h	OK	13.0184	1.92885	-2.75474	-2.91108	0.00015	0.000893574	yes	coding	/
MSTRG.101738.1	0h	24h	OK	0	15.4636	inf	#NAME?	5e-05	0.000327342	yes	noncoding	LncRNA
MSTRG.101750.1	0h	24h	OK	1596.59	387.709	-2.04195	-3.72054	5e-05	0.000327342	yes	coding	/
MSTRG.101751.1	0h	24h	OK	0	13.7862	inf	#NAME?	5e-05	0.000327342	yes	coding	/
MSTRG.101763.1	0h	24h	OK	0	5.22506	inf	#NAME?	5e-05	0.000327342	yes	noncoding	LncRNA
MSTRG.101768.4	0h	24h	OK	0.531399	8.13578	3.93641	3.36892	5e-05	0.000327342	yes	coding	/
MSTRG.101778.1	0h	24h	OK	5.03353	0.65408	-2.94403	-1.97722	0.0043	0.0233828	yes	noncoding	LncRNA
MSTRG.101809.1	0h	24h	OK	3.35166	8.12738	1.27791	1.85749	0.0033	0.0181073	yes	coding	/
MSTRG.101837.2	0h	24h	OK	40.5895	19.6995	-1.04295	-2.32044	5e-05	0.000327342	yes	coding	/
MSTRG.101960.1	0h	24h	OK	0	3.68415	inf	#NAME?	0.0001	0.000607975	yes	noncoding	LncRNA
MSTRG.102094.1	0h	24h	OK	0	15.2659	inf	#NAME?	5e-05	0.000327342	yes	noncoding	LncRNA
MSTRG.102096.1	0h	24h	OK	0	15.3413	inf	#NAME?	5e-05	0.000327342	yes	noncoding	LncRNA
MSTRG.102112.1	0h	24h	OK	0	25.5888	inf	#NAME?	5e-05	0.000327342	yes	noncoding	LncRNA
MSTRG.102214.1	0h	24h	OK	0	7.09632	inf	#NAME?	5e-05	0.000327342	yes	noncoding	LncRNA
MSTRG.102258.3	0h	24h	OK	0.598964	7.1586	3.57913	2.94646	0.00105	0.00602046	yes	coding	/
MSTRG.102310.1	0h	24h	OK	0	5.59903	inf	#NAME?	5e-05	0.000327342	yes	noncoding	LncRNA
MSTRG.102324.1	0h	24h	OK	74.6904	13.6755	-2.44933	-4.17456	5e-05	0.000327342	yes	coding	/
MSTRG.102463.1	0h	24h	OK	0	11.6602	inf	#NAME?	5e-05	0.000327342	yes	noncoding	LncRNA
MSTRG.102475.1	0h	24h	OK	0	3.73864	inf	#NAME?	5e-05	0.000327342	yes	noncoding	LncRNA
MSTRG.102486.1	0h	24h	OK	0	12.5127	inf	#NAME?	5e-05	0.000327342	yes	noncoding	LncRNA
MSTRG.102500.1	0h	24h	OK	7.12159	2.54036	-1.48717	-1.90543	0.0034	0.0186319	yes	coding	/
MSTRG.102525.1	0h	24h	OK	0	7.15926	inf	#NAME?	5e-05	0.000327342	yes	noncoding	LncRNA
MSTRG.102544.1	0h	24h	OK	0	4.16317	inf	#NAME?	0.0001	0.000607975	yes	coding	/
MSTRG.102593.1	0h	24h	OK	0	14.8658	inf	#NAME?	5e-05	0.000327342	yes	noncoding	LncRNA
MSTRG.102658.1	0h	24h	OK	219.369	815.134	1.89368	4.47211	5e-05	0.000327342	yes	noncoding	LncRNA
MSTRG.102696.1	0h	24h	OK	5.22892	16.0949	1.62202	2.06284	0.00165	0.00935992	yes	coding	/
MSTRG.10270.2	0h	24h	OK	9.41287	20.2245	1.1034	1.72108	0.00355	0.0194249	yes	coding	/
MSTRG.102714.1	0h	24h	OK	0.826566	11.9107	3.84899	2.65819	0.003	0.0167171	yes	coding	/
MSTRG.102720.1	0h	24h	OK	0	21.668	inf	#NAME?	5e-05	0.000327342	yes	noncoding	LncRNA
MSTRG.102726.1	0h	24h	OK	1.21776	6.7438	2.46933	3.36996	5e-05	0.000327342	yes	noncoding	LncRNA
MSTRG.102728.1	0h	24h	OK	0	63.9838	inf	#NAME?	5e-05	0.000327342	yes	noncoding	LncRNA
MSTRG.102764.1	0h	24h	OK	1.12167	7.75548	2.78957	3.8209	5e-05	0.000327342	yes	noncoding	LncRNA
MSTRG.102772.1	0h	24h	OK	1.14837	81.6324	6.15148	4.05284	5e-05	0.000327342	yes	coding	/
MSTRG.102852.1	0h	24h	OK	0	2.53786	inf	#NAME?	0.0002	0.00118357	yes	noncoding	LncRNA
MSTRG.102915.1	0h	24h	OK	0	2.10989	inf	#NAME?	0.00045	0.00262489	yes	noncoding	LncRNA
MSTRG.102990.1	0h	24h	OK	0	6.01017	inf	#NAME?	0.0001	0.000607975	yes	noncoding	LncRNA
MSTRG.102991.1	0h	24h	OK	185.58	87.1468	-1.09052	-2.32621	0.00025	0.00147346	yes	coding	/
MSTRG.103018.1	0h	24h	OK	5.18279	2.23446	-1.2138	-1.96603	0.00165	0.00935992	yes	coding	/
MSTRG.103104.1	0h	24h	OK	2.53321	8.5164	1.74927	2.05771	0.00265	0.0148421	yes	coding	/
MSTRG.103114.1	0h	24h	OK	116.137	27.3102	-2.08832	-4.16118	5e-05	0.000327342	yes	noncoding	LncRNA
MSTRG.103151.1	0h	24h	OK	2.73963	11.5109	2.07094	1.70878	0.00785	0.0415703	yes	coding	/
MSTRG.103170.2	0h	24h	OK	13.5242	5.62761	-1.26494	-2.32677	5e-05	0.000327342	yes	coding	/
MSTRG.103244.1	0h	24h	OK	0	2.42526	inf	#NAME?	5e-05	0.000327342	yes	noncoding	LncRNA
MSTRG.103270.1	0h	24h	OK	0	4.95525	inf	#NAME?	5e-05	0.000327342	yes	noncoding	LncRNA
MSTRG.103327.1	0h	24h	OK	20.7467	6.66686	-1.6378	-2.33599	0.0007	0.00404934	yes	noncoding	LncRNA
MSTRG.103383.1	0h	24h	OK	4.13587	1.32118	-1.64636	-1.80925	0.0061	0.0327002	yes	noncoding	LncRNA
MSTRG.103386.1	0h	24h	OK	43.1688	16.9277	-1.35061	-1.87918	0.0039	0.0212736	yes	noncoding	LncRNA
MSTRG.10344.1	0h	24h	OK	0	12.274	inf	#NAME?	5e-05	0.000327342	yes	noncoding	LncRNA
MSTRG.103467.1	0h	24h	OK	0	7.38868	inf	#NAME?	5e-05	0.000327342	yes	noncoding	LncRNA
MSTRG.103470.1	0h	24h	OK	1.62377	13.2425	3.02776	3.25291	5e-05	0.000327342	yes	coding	/
MSTRG.1035.1	0h	24h	OK	2.49522	19.9354	2.99809	1.89152	0.0066	0.0352646	yes	noncoding	LncRNA
MSTRG.103519.2	0h	24h	OK	11.8812	5.7146	-1.05595	-1.77009	0.0033	0.0181073	yes	coding	/
MSTRG.103569.1	0h	24h	OK	0	6.04421	inf	#NAME?	5e-05	0.000327342	yes	noncoding	LncRNA
MSTRG.103574.1	0h	24h	OK	67.5551	18.0056	-1.90762	-3.70826	5e-05	0.000327342	yes	noncoding	LncRNA
MSTRG.103612.1	0h	24h	OK	0	11.3048	inf	#NAME?	5e-05	0.000327342	yes	noncoding	LncRNA
MSTRG.103614.1	0h	24h	OK	37.2443	123.062	1.7243	3.85138	5e-05	0.000327342	yes	coding	/
MSTRG.103615.1	0h	24h	OK	3.87296	12.5444	1.69554	1.72991	0.0088	0.0463637	yes	noncoding	LncRNA
MSTRG.103623.1	0h	24h	OK	2.98784	7.0597	1.2405	1.57247	0.00825	0.0436041	yes	coding	/
MSTRG.103643.2	0h	24h	OK	11.4423	5.21952	-1.13239	-1.74436	0.006	0.0321845	yes	coding	/
MSTRG.103652.1	0h	24h	OK	6.38239	0	#NAME?	#NAME?	0.00295	0.0164629	yes	noncoding	LncRNA
MSTRG.103658.1	0h	24h	OK	2.14617	0	#NAME?	#NAME?	0.0001	0.000607975	yes	noncoding	LncRNA
MSTRG.103689.1	0h	24h	OK	22.8562	4.64757	-2.29803	-1.95819	0.0037	0.020223	yes	coding	/
MSTRG.10371.1	0h	24h	OK	0	2.48622	inf	#NAME?	5e-05	0.000327342	yes	noncoding	LncRNA
MSTRG.103811.1	0h	24h	OK	2.11085	0	#NAME?	#NAME?	5e-05	0.000327342	yes	noncoding	LncRNA
MSTRG.103833.1	0h	24h	OK	27.7338	11.5531	-1.26337	-2.30406	0.0002	0.00118357	yes	noncoding	LncRNA
MSTRG.103857.1	0h	24h	OK	140.399	469.389	1.74125	2.99072	5e-05	0.000327342	yes	noncoding	LncRNA
MSTRG.103871.1	0h	24h	OK	0.685359	13.3533	4.2842	2.78447	0.00105	0.00602046	yes	coding	/
MSTRG.103873.2	0h	24h	OK	17.9031	5.38703	-1.73265	-3.20257	5e-05	0.000327342	yes	coding	/
MSTRG.103880.1	0h	24h	OK	0.788461	7.70111	3.28796	2.04832	0.00455	0.0246898	yes	noncoding	LncRNA
MSTRG.103899.1	0h	24h	OK	5.24418	21.8133	2.05642	2.24977	0.0015	0.00852791	yes	noncoding	LncRNA
MSTRG.104046.1	0h	24h	OK	24.2431	95.9747	1.98508	1.93861	0.00705	0.037552	yes	noncoding	LncRNA
MSTRG.104059.1	0h	24h	OK	1.04634	11.1413	3.41249	3.17189	0.0001	0.000607975	yes	noncoding	LncRNA
MSTRG.104071.1	0h	24h	OK	0.201347	1.84111	3.19282	1.88421	0.0056	0.030117	yes	noncoding	LncRNA
MSTRG.104087.1	0h	24h	OK	0	9.13572	inf	#NAME?	5e-05	0.000327342	yes	noncoding	LncRNA
MSTRG.104148.1	0h	24h	OK	83.0446	18.1705	-2.19229	-3.14715	5e-05	0.000327342	yes	noncoding	LncRNA
MSTRG.104167.3	0h	24h	OK	45.9578	20.2433	-1.18286	-2.54186	5e-05	0.000327342	yes	coding	/
MSTRG.104171.1	0h	24h	OK	5.84628	50.7358	3.11741	3.47796	5e-05	0.000327342	yes	noncoding	LncRNA
MSTRG.104215.1	0h	24h	OK	0	4.88191	inf	#NAME?	5e-05	0.000327342	yes	noncoding	LncRNA
MSTRG.104221.2	0h	24h	OK	8.64405	48.292	2.48201	5.12411	5e-05	0.000327342	yes	coding	/
MSTRG.104224.1	0h	24h	OK	0.261124	12.9136	5.62802	3.1681	0.0088	0.0463637	yes	noncoding	LncRNA
MSTRG.104361.1	0h	24h	OK	0	7.38048	inf	#NAME?	5e-05	0.000327342	yes	noncoding	LncRNA
MSTRG.104365.1	0h	24h	OK	7.13049	17.2579	1.27518	1.80438	0.0025	0.0140249	yes	coding	/
MSTRG.104368.1	0h	24h	OK	31.6374	15.2136	-1.05627	-2.08433	0.00055	0.00319537	yes	noncoding	LncRNA
MSTRG.104380.2	0h	24h	OK	16.6016	3.50669	-2.24314	-2.53269	0.0001	0.000607975	yes	coding	/
MSTRG.104386.1	0h	24h	OK	0	1.46745	inf	#NAME?	5e-05	0.000327342	yes	noncoding	LncRNA
MSTRG.104421.1	0h	24h	OK	23.998	6.82344	-1.81434	-2.18292	0.00415	0.0225938	yes	coding	/
MSTRG.104485.1	0h	24h	OK	10.1204	87.7817	3.11666	4.21148	5e-05	0.000327342	yes	coding	/
MSTRG.104523.1	0h	24h	OK	16.0193	7.96559	-1.00795	-1.62392	0.0069	0.0367907	yes	coding	/
MSTRG.104533.1	0h	24h	OK	36.6976	2.08104	-4.1403	-3.21037	0.00155	0.00880597	yes	noncoding	LncRNA
MSTRG.104563.2	0h	24h	OK	1.30087	8.89056	2.77279	3.07105	0.00035	0.00204936	yes	coding	/
MSTRG.104609.2	0h	24h	OK	2.21107	11.8219	2.41865	2.24847	0.00395	0.0215376	yes	coding	/
MSTRG.104629.1	0h	24h	OK	3.10029	0	#NAME?	#NAME?	5e-05	0.000327342	yes	coding	/
MSTRG.104650.1	0h	24h	OK	13.653	4.0182	-1.7646	-2.8113	0.0001	0.000607975	yes	coding	/
MSTRG.104673.1	0h	24h	OK	17.1448	48.0978	1.4882	2.98492	5e-05	0.000327342	yes	noncoding	LncRNA
MSTRG.104677.1	0h	24h	OK	2.76651	17.6632	2.67461	2.37755	0.0029	0.0161962	yes	noncoding	LncRNA
MSTRG.104805.1	0h	24h	OK	0	4.21754	inf	#NAME?	5e-05	0.000327342	yes	noncoding	LncRNA
MSTRG.104826.1	0h	24h	OK	9.4425	2.94869	-1.6791	-2.36886	0.00045	0.00262489	yes	coding	/
MSTRG.104832.1	0h	24h	OK	23.6237	6.38353	-1.88781	-2.71747	5e-05	0.000327342	yes	coding	/
MSTRG.104844.1	0h	24h	OK	1278.88	453.26	-1.49647	-3.43644	5e-05	0.000327342	yes	noncoding	LncRNA
MSTRG.104860.1	0h	24h	OK	40.7539	10.91	-1.90129	-2.77281	0.0001	0.000607975	yes	coding	/
MSTRG.104889.1	0h	24h	OK	2.82127	6.71782	1.25165	1.69699	0.00575	0.0308887	yes	noncoding	LncRNA
MSTRG.104917.1	0h	24h	OK	0	2.4527	inf	#NAME?	5e-05	0.000327342	yes	noncoding	LncRNA
MSTRG.104928.1	0h	24h	OK	10.7151	4.57494	-1.22782	-1.73834	0.0041	0.0223336	yes	coding	/
MSTRG.104952.2	0h	24h	OK	57.4931	22.5933	-1.34749	-2.66708	5e-05	0.000327342	yes	coding	/
MSTRG.104976.1	0h	24h	OK	17.9564	4.47285	-2.00523	-3.40981	5e-05	0.000327342	yes	coding	/
MSTRG.104979.1	0h	24h	OK	10.528	3.78927	-1.47424	-2.44145	5e-05	0.000327342	yes	coding	/
MSTRG.104989.1	0h	24h	OK	20.2139	9.08002	-1.15458	-1.8025	0.0036	0.0196911	yes	coding	/
MSTRG.105077.1	0h	24h	OK	96.9337	19.0232	-2.34924	-4.26301	5e-05	0.000327342	yes	noncoding	LncRNA
MSTRG.105131.2	0h	24h	OK	24.7398	7.16264	-1.78827	-3.59454	5e-05	0.000327342	yes	coding	/
MSTRG.105145.1	0h	24h	OK	25.2251	2.84782	-3.14693	-2.99227	0.0003	0.00176267	yes	coding	/
MSTRG.105156.1	0h	24h	OK	17.3907	121.67	2.80658	3.01574	5e-05	0.000327342	yes	coding	/
MSTRG.105225.2	0h	24h	OK	1.31265	4.91342	1.90425	1.74768	0.0029	0.0161962	yes	coding	/
MSTRG.105330.1	0h	24h	OK	0	5.18519	inf	#NAME?	5e-05	0.000327342	yes	noncoding	LncRNA
MSTRG.105353.1	0h	24h	OK	1.79145	34.2642	4.2575	2.88538	0.0016	0.00908395	yes	coding	/
MSTRG.105382.2	0h	24h	OK	15.2256	6.98663	-1.12383	-2.05236	0.0008	0.00461507	yes	coding	/
MSTRG.105394.1	0h	24h	OK	4.78072	14.4801	1.59877	2.74168	5e-05	0.000327342	yes	coding	/
MSTRG.105399.1	0h	24h	OK	7.4808	2.39058	-1.64583	-2.03244	0.0061	0.0327002	yes	coding	/
MSTRG.105442.1	0h	24h	OK	0	7.9466	inf	#NAME?	5e-05	0.000327342	yes	noncoding	LncRNA
MSTRG.105448.2	0h	24h	OK	4.81229	12.2721	1.35059	1.63587	0.0064	0.0342447	yes	coding	/
MSTRG.105537.1	0h	24h	OK	2.29564	15.1237	2.71984	3.83632	5e-05	0.000327342	yes	coding	/
MSTRG.105541.1	0h	24h	OK	0	40.8721	inf	#NAME?	5e-05	0.000327342	yes	noncoding	LncRNA
MSTRG.105570.1	0h	24h	OK	0	13.4118	inf	#NAME?	5e-05	0.000327342	yes	noncoding	LncRNA
MSTRG.105631.3	0h	24h	OK	11.2838	111.022	3.29852	2.48581	0.0018	0.0101886	yes	noncoding	LncRNA
MSTRG.105632.1	0h	24h	OK	231.593	2207.72	3.25289	7.23044	5e-05	0.000327342	yes	noncoding	LncRNA
MSTRG.105678.1	0h	24h	OK	641.781	217.841	-1.5588	-3.69612	5e-05	0.000327342	yes	coding	/
MSTRG.105809.1	0h	24h	OK	7.87889	25.7007	1.70574	2.51457	5e-05	0.000327342	yes	coding	/
MSTRG.105843.2	0h	24h	OK	1.39186	6.97979	2.32617	2.68896	0.0002	0.00118357	yes	coding	/
MSTRG.105845.2	0h	24h	OK	14.7459	44.4702	1.59252	3.42003	5e-05	0.000327342	yes	coding	/
MSTRG.105854.1	0h	24h	OK	5.41816	0	#NAME?	#NAME?	5e-05	0.000327342	yes	noncoding	LncRNA
[truncated: 4,845 more rows]
