# Supplementary material for: Transcriptome dynamics uncovers long non-coding RNAs response to salinity stress in Chenopodium quinoa
Source: Front Plant Sci. 2022 Sep 20;13:988845. doi: 10.3389/fpls.2022.988845 (PMC9530330; doi:10.3389/fpls.2022.988845)
Supplement: Supplementary file 6 [file Table_6.XLSX]

## Sheet: Sheet1
Table S6: Candidate hub genes including coding RNAs and LncRNAs response to salt stress
Transcript_id	Gene_id	Ref_gene_id	Ref_transcript_id	Module	Chr	Start	End	Class_code	len	LncRNA	TF	Membership
MSTRG.4038.1	MSTRG.4038	-	-	darkgrey	Chr00	81671184	81671862	u	679	LncRNA	-	0.992522
MSTRG.10061.9	MSTRG.10061	-	-	darkgrey	Chr00	184475904	184482728	u	864	LncRNA	-	0.948807
MSTRG.10128.1	MSTRG.10128	AUR62033952	AUR62033952-RA	darkgrey	Chr00	184751716	184752318	x	603	LncRNA	-	0.996761
AUR62014699-RA	MSTRG.15155	AUR62014699	AUR62014699-RA	darkgrey	Chr01	29212627	29215596	=	593	/	-	0.974084
MSTRG.20272.1	MSTRG.20272	AUR62038666	AUR62038666-RA	darkgrey	Chr01	59572442	59577828	j	2513	/	-	0.923885
MSTRG.24825.1	MSTRG.24825	-	-	darkgrey	Chr01	103221366	103221882	u	517	LncRNA	-	0.981063
AUR62023305-RA	MSTRG.26949	AUR62023305	AUR62023305-RA	darkgrey	Chr01	114638834	114644416	=	779	/	-	0.955764
MSTRG.32624.1	MSTRG.32624	AUR62035843	AUR62035843-RA	darkgrey	Chr02	11234911	11235457	x	547	LncRNA	-	0.988823
MSTRG.34444.1	MSTRG.34444	-	-	darkgrey	Chr02	24723132	24723717	u	586	/	-	0.989263
AUR62028362-RA	MSTRG.37776	AUR62028362	AUR62028362-RA	darkgrey	Chr02	50128614	50130901	k	2288	/	-	0.979526
MSTRG.38117.1	MSTRG.38117	-	-	darkgrey	Chr02	52025193	52026614	u	1422	LncRNA	-	0.981236
MSTRG.40282.1	MSTRG.40282	-	-	darkgrey	Chr03	5925163	5925834	u	672	LncRNA	-	0.985893
MSTRG.40290.1	MSTRG.40290	-	-	darkgrey	Chr03	6063372	6064043	u	672	LncRNA	-	0.967721
MSTRG.41034.1	MSTRG.41034	-	-	darkgrey	Chr03	13103958	13105080	u	1123	LncRNA	-	0.971306
MSTRG.43014.1	MSTRG.43014	-	-	darkgrey	Chr03	29437928	29438769	u	842	LncRNA	-	0.992175
MSTRG.50385.1	MSTRG.50385	-	-	darkgrey	Chr04	1968264	1969732	u	1469	LncRNA	-	0.993255
MSTRG.67089.1	MSTRG.67089	-	-	darkgrey	Chr05	68837520	68838221	u	702	LncRNA	-	0.97737
MSTRG.73396.6	MSTRG.73396	AUR62002826	AUR62002826-RA	darkgrey	Chr06	19764974	19765478	i	505	LncRNA	-	0.981522
MSTRG.73658.1	MSTRG.73658	-	-	darkgrey	Chr06	21804516	21805030	u	515	LncRNA	-	0.954625
MSTRG.75002.1	MSTRG.75002	AUR62038505	AUR62038505-RA	darkgrey	Chr06	32706108	32706749	x	642	LncRNA	-	0.995865
MSTRG.75208.1	MSTRG.75208	-	-	darkgrey	Chr06	34515048	34515588	u	541	LncRNA	-	0.996022
MSTRG.90013.1	MSTRG.90013	-	-	darkgrey	Chr07	79668306	79668951	u	646	LncRNA	-	0.998596
MSTRG.98383.1	MSTRG.98383	-	-	darkgrey	Chr08	8958943	8959735	u	793	LncRNA	-	0.980924
MSTRG.129814.1	MSTRG.129814	-	-	darkgrey	Chr12	39539154	39539717	u	564	LncRNA	-	0.981336
AUR62029300-RA	MSTRG.131640	AUR62029300	AUR62029300-RA	darkgrey	Chr12	52100742	52101038	=	297	/	-	0.996234
MSTRG.145427.1	MSTRG.145427	-	-	darkgrey	Chr15	7309697	7310162	u	466	LncRNA	-	0.959568
MSTRG.149729.1	MSTRG.149729	-	-	darkgrey	Chr15	32221823	32222471	u	649	LncRNA	-	0.984048
MSTRG.153164.3	MSTRG.153164	AUR62032964	AUR62032964-RA	darkgrey	Chr15	61570584	61575442	j	3150	/	-	0.964327
MSTRG.176332.1	MSTRG.176332	-	-	darkgrey	Chr18	4027422	4027876	u	455	LncRNA	-	0.995344
MSTRG.176466.1	MSTRG.176466	-	-	darkgrey	Chr18	4961138	4962393	u	1256	LncRNA	-	0.978634
MSTRG.2130.1	MSTRG.2130	AUR62029121	AUR62029121-RA	darkturquoise	Chr00	39882153	39885130	n	1590	/	-	0.961814
MSTRG.6265.1	MSTRG.6265	AUR62036868	AUR62036868-RA	darkturquoise	Chr00	128112210	128133010	j	1803	/	-	0.94738
MSTRG.6976.1	MSTRG.6976	AUR62017551	AUR62017551-RA	darkturquoise	Chr00	136007534	136010369	k	2254	/	-	0.964766
MSTRG.38782.1	MSTRG.38782	-	-	darkturquoise	Chr02	55336230	55337168	u	779	LncRNA	-	0.973879
MSTRG.39057.1	MSTRG.39057	AUR62011085	AUR62011085-RA	darkturquoise	Chr02	56511244	56513138	k	1466	/	-	0.943068
AUR62036751-RA	MSTRG.40359	AUR62036751	AUR62036751-RA	darkturquoise	Chr03	6448462	6456648	=	1242	/	-	0.975602
MSTRG.51521.1	MSTRG.51521	-	-	darkturquoise	Chr04	7015417	7016354	u	938	/	-	0.983586
MSTRG.57479.1	MSTRG.57479	AUR62030632	AUR62030632-RA	darkturquoise	Chr04	49381506	49383535	x	2030	LncRNA	-	0.919857
AUR62002982-RA	MSTRG.72542	AUR62002982	AUR62002982-RA	darkturquoise	Chr06	14333343	14346337	=	4683	/	-	0.958749
MSTRG.76423.1	MSTRG.76423	-	-	darkturquoise	Chr06	44726359	44727377	u	1019	LncRNA	-	0.979231
AUR62001818-RA	MSTRG.95157	AUR62001818	AUR62001818-RA	darkturquoise	Chr07	104704567	104707466	=	2622	/	-	0.952529
MSTRG.95740.1	MSTRG.95740	AUR62025499	AUR62025499-RA	darkturquoise	Chr07	108205853	108208310	k	2342	/	-	0.985902
AUR62007621-RA	MSTRG.103145	AUR62007621	AUR62007621-RA	darkturquoise	Chr09	1129305	1131798	=	1519	/	-	0.968932
AUR62003811-RA	MSTRG.104312	AUR62003811	AUR62003811-RA	darkturquoise	Chr09	6411211	6412671	=	1461	/	-	0.978921
MSTRG.107833.1	MSTRG.107833	AUR62019115	AUR62019115-RA	darkturquoise	Chr10	8929164	8934126	j	3162	/	-	0.896835
AUR62026804-RA	MSTRG.109792	AUR62026804	AUR62026804-RA	darkturquoise	Chr10	19832387	19833797	=	619	/	-	0.980467
MSTRG.115415.1	MSTRG.115415	AUR62024468	AUR62024468-RA	darkturquoise	Chr11	6133620	6135283	m	1664	/	-	0.978733
AUR62029350-RA	MSTRG.131482	AUR62029350	AUR62029350-RA	darkturquoise	Chr12	51211394	51214090	=	2070	/	-	0.943609
MSTRG.139350.1	MSTRG.139350	-	-	darkturquoise	Chr14	23597340	23601378	u	1181	LncRNA	-	0.986959
MSTRG.143180.1	MSTRG.143180	AUR62005666	AUR62005666-RA	darkturquoise	Chr14	55281304	55282961	x	1658	LncRNA	-	0.999749
AUR62005666-RA	MSTRG.143181	AUR62005666	AUR62005666-RA	darkturquoise	Chr14	55281831	55282540	=	710	/	-	0.99646
MSTRG.146103.1	MSTRG.146103	AUR62011400	AUR62011400-RA	darkturquoise	Chr15	10251143	10257177	j	3701	/	-	0.943273
MSTRG.152468.1	MSTRG.152468	-	-	darkturquoise	Chr15	57928160	57929974	u	1239	/	-	0.968047
MSTRG.161850.1	MSTRG.161850	AUR62017380	AUR62017380-RA	darkturquoise	Chr16	66058757	66063201	j	1694	/	-	0.994608
MSTRG.163979.1	MSTRG.163979	AUR62018644	AUR62018644-RA	darkturquoise	Chr16	76663447	76668016	j	1776	/	-	0.895538
AUR62039921-RA	MSTRG.164338	AUR62039921	AUR62039921-RA	darkturquoise	Chr16	78551042	78552613	=	1572	/	-	0.962992
MSTRG.164399.1	MSTRG.164399	AUR62039946	AUR62039946-RA	darkturquoise	Chr16	78885952	78891828	j	2268	/	-	0.95676
AUR62028557-RA	MSTRG.169191	AUR62028557	AUR62028557-RA	darkturquoise	Chr17	43498106	43503376	=	2026	/	-	0.945466
MSTRG.172240.1	MSTRG.172240	AUR62008698	AUR62008698-RA	darkturquoise	Chr17	65021020	65024038	n	2197	/	-	0.963919
MSTRG.180340.1	MSTRG.180340	AUR62009604	AUR62009604-RA	darkturquoise	Chr18	28470438	28473580	m	2852	/	-	0.925507
AUR62021231-RA	MSTRG.1787	AUR62021231	AUR62021231-RA	lightpink4	Chr00	35969871	35971199	=	1329	/	-	0.97211
AUR62041401-RA	MSTRG.3177	AUR62041401	AUR62041401-RA	lightpink4	Chr00	58529752	58530447	=	696	/	ERF	0.963881
AUR62036867-RA	MSTRG.6263	AUR62036867	AUR62036867-RA	lightpink4	Chr00	128107950	128112051	=	2097	/	-	0.990372
MSTRG.18109.1	MSTRG.18109	AUR62024859	AUR62024859-RA	lightpink4	Chr01	45404227	45405243	x	1017	LncRNA	-	0.984479
MSTRG.27176.1	MSTRG.27176	AUR62023225	AUR62023225-RA	lightpink4	Chr01	115561606	115562741	x	1136	LncRNA	-	0.93165
MSTRG.28652.1	MSTRG.28652	AUR62004715	AUR62004715-RA	lightpink4	Chr01	122502049	122504877	j	1890	/	-	0.986483
MSTRG.32177.1	MSTRG.32177	AUR62031196	AUR62031196-RA	lightpink4	Chr02	7666778	7676588	k	2426	/	-	0.984087
MSTRG.33541.1	MSTRG.33541	-	-	lightpink4	Chr02	19595171	19595818	u	648	LncRNA	-	0.999648
AUR62027792-RA	MSTRG.47734	AUR62027792	AUR62027792-RA	lightpink4	Chr03	69431861	69432796	=	936	/	-	0.908595
MSTRG.47739.1	MSTRG.47739	AUR62027794	AUR62027794-RA	lightpink4	Chr03	69454817	69455990	x	1174	LncRNA	-	0.999098
AUR62027873-RA	MSTRG.47957	AUR62027873	AUR62027873-RA	lightpink4	Chr03	70590506	70592068	=	1563	/	-	0.996739
MSTRG.49494.1	MSTRG.49494	AUR62012259	AUR62012259-RA	lightpink4	Chr03	78561271	78563700	n	2276	/	C3H	0.984803
MSTRG.50550.1	MSTRG.50550	AUR62022892	AUR62022892-RA	lightpink4	Chr04	2687862	2690308	n	2334	/	C3H	0.959269
MSTRG.53816.1	MSTRG.53816	AUR62035984	AUR62035984-RA	lightpink4	Chr04	22819408	22823129	m	3722	/	-	0.988456
AUR62031716-RA	MSTRG.56340	AUR62031716	AUR62031716-RA	lightpink4	Chr04	41451188	41452498	=	1311	/	-	0.944906
MSTRG.66629.1	MSTRG.66629	AUR62004877	AUR62004877-RA	lightpink4	Chr05	66107889	66109215	p	1327	/	-	0.994677
MSTRG.67664.1	MSTRG.67664	AUR62005181	AUR62005181-RA	lightpink4	Chr05	71852773	71854970	m	2198	/	-	0.99553
MSTRG.82038.1	MSTRG.82038	-	-	lightpink4	Chr07	24273251	24273984	u	734	/	-	0.999461
MSTRG.104197.1	MSTRG.104197	AUR62003762	AUR62003762-RA	lightpink4	Chr09	5848371	5851120	j	2163	/	-	0.992288
MSTRG.104381.1	MSTRG.104381	AUR62003838	AUR62003838-RA	lightpink4	Chr09	6679449	6683873	j	2544	/	-	0.915453
AUR62023534-RA	MSTRG.106274	AUR62023534	AUR62023534-RA	lightpink4	Chr10	1458312	1460363	=	2052	/	-	0.991929
MSTRG.124883.1	MSTRG.124883	AUR62000259	AUR62000259-RA	lightpink4	Chr12	3056277	3059004	x	2728	LncRNA	-	0.986559
MSTRG.136830.4	MSTRG.136830	AUR62007758	AUR62007758-RA	lightpink4	Chr14	5667527	5669459	j	1655	/	-	0.996274
MSTRG.137519.1	MSTRG.137519	AUR62037288	AUR62037288-RA	lightpink4	Chr14	9926158	9929743	x	3586	/	-	0.969455
MSTRG.141761.1	MSTRG.141761	AUR62039424	AUR62039424-RA	lightpink4	Chr14	48250248	48252865	x	2618	LncRNA	-	0.978634
MSTRG.151740.1	MSTRG.151740	-	-	lightpink4	Chr15	53065953	53067013	u	1061	/	bHLH	0.992649
MSTRG.151970.1	MSTRG.151970	-	-	lightpink4	Chr15	55330049	55330807	u	759	/	FAR1	0.997632
MSTRG.163943.1	MSTRG.163943	AUR62018661	AUR62018661-RA	lightpink4	Chr16	76438796	76440183	k	1200	/	-	0.994755
MSTRG.170887.2	MSTRG.170887	AUR62037033	AUR62037033-RA	lightpink4	Chr17	56827627	56829132	n	1240	/	-	0.969065
MSTRG.181130.1	MSTRG.181130	AUR62020248	AUR62020248-RA	lightpink4	Chr18	32455450	32456762	x	1313	LncRNA	-	0.987919
MSTRG.1806.1	MSTRG.1806	AUR62021237	AUR62021237-RA	pink	Chr00	36073176	36075411	x	2236	LncRNA	-	0.940638
AUR62025200-RA	MSTRG.16053	AUR62025200	AUR62025200-RA	pink	Chr01	33914859	33918375	=	1429	/	-	0.918117
AUR62024811-RA	MSTRG.18256	AUR62024811	AUR62024811-RA	pink	Chr01	46165992	46169512	=	1282	/	-	0.932042
MSTRG.18332.1	MSTRG.18332	-	-	pink	Chr01	46436486	46438113	u	835	/	-	0.918119
AUR62027652-RA	MSTRG.29534	AUR62027652	AUR62027652-RA	pink	Chr01	128370219	128380970	=	1602	/	-	0.908108
MSTRG.30474.1	MSTRG.30474	-	-	pink	Chr01	135082225	135083292	u	816	LncRNA	-	0.912846
MSTRG.33977.1	MSTRG.33977	-	-	pink	Chr02	21741362	21745507	u	3369	/	-	0.919191
AUR62036773-RA	MSTRG.40457	AUR62036773	AUR62036773-RA	pink	Chr03	7195161	7202405	=	2392	/	-	0.891933
MSTRG.47227.1	MSTRG.47227	AUR62013455	AUR62013455-RA	pink	Chr03	66552687	66555401	m	2715	/	-	0.947497
AUR62012194-RA	MSTRG.49668	AUR62012194	AUR62012194-RA	pink	Chr03	79340826	79342694	=	766	/	-	0.995914
AUR62032434-RA	MSTRG.58107	AUR62032434	AUR62032434-RA	pink	Chr04	52943719	52949622	=	2154	/	-	0.956524
MSTRG.68733.1	MSTRG.68733	AUR62006662	AUR62006662-RA	pink	Chr05	77249108	77251176	o	1970	/	-	0.97454
AUR62003338-RA	MSTRG.71437	AUR62003338	AUR62003338-RA	pink	Chr06	8928604	8933423	=	1856	/	-	0.982816
MSTRG.86217.1	MSTRG.86217	-	-	pink	Chr07	61515308	61517170	u	557	LncRNA	-	0.953369
MSTRG.89518.1	MSTRG.89518	AUR62016070	AUR62016070-RA	pink	Chr07	77199998	77201615	x	1618	LncRNA	-	0.930919
AUR62001273-RA	MSTRG.93628	AUR62001273	AUR62001273-RA	pink	Chr07	98467664	98469271	=	1608	/	-	0.906049
AUR62001446-RA	MSTRG.94107	AUR62001446	AUR62001446-RA	pink	Chr07	100497032	100498751	=	1010	/	-	0.958581
AUR62011912-RA	MSTRG.97095	AUR62011912	AUR62011912-RA	pink	Chr08	2561038	2562591	=	1554	/	-	0.959429
MSTRG.102258.2	MSTRG.102258	AUR62029916	AUR62029916-RA	pink	Chr08	37569341	37577306	n	2057	/	-	0.972064
MSTRG.107850.1	MSTRG.107850	-	-	pink	Chr10	8987039	8991171	u	3564	/	-	0.967027
MSTRG.133613.3	MSTRG.133613	AUR62007176	AUR62007176-RA	pink	Chr13	3937069	3942051	j	2471	/	-	0.91692
AUR62010724-RA	MSTRG.134512	AUR62010724	AUR62010724-RA	pink	Chr13	8486950	8488236	=	1287	/	-	0.979832
MSTRG.144455.1	MSTRG.144455	AUR62006247	AUR62006247-RA	pink	Chr15	2413189	2419844	k	2443	/	B3	0.948614
AUR62031908-RA	MSTRG.147509	AUR62031908	AUR62031908-RA	pink	Chr15	17224222	17234574	=	4873	/	-	0.985385
MSTRG.162010.5	MSTRG.162010	AUR62017337	AUR62017337-RA	pink	Chr16	66744089	66746037	j	1117	/	bHLH	0.952091
MSTRG.172322.1	MSTRG.172322	AUR62008723	AUR62008723-RA	pink	Chr17	65386524	65388236	j	1431	LncRNA	-	0.903335
MSTRG.175678.1	MSTRG.175678	AUR62030901	AUR62030901-RA	pink	Chr17	82627613	82629162	j	552	/	-	0.820835
AUR62022200-RA	MSTRG.178702	AUR62022200	AUR62022200-RA	pink	Chr18	20761965	20772849	=	4882	/	-	0.967757
AUR62009919-RA	MSTRG.179612	AUR62009919	AUR62009919-RA	pink	Chr18	25126112	25127860	=	1012	/	-	0.990689
AUR62009745-RA	MSTRG.180030	AUR62009745	AUR62009745-RA	pink	Chr18	27103107	27103715	=	609	/	-	0.941135
MSTRG.23778.2	MSTRG.23778	AUR62043062	AUR62043062-RA	salmon	Chr01	92955461	92966398	j	4099	/	-	0.981994
MSTRG.32277.2	MSTRG.32277	AUR62031228	AUR62031228-RA	salmon	Chr02	8389387	8402411	n	2504	/	-	0.958007
AUR62036746-RA	MSTRG.40345	AUR62036746	AUR62036746-RA	salmon	Chr03	6381068	6389522	=	1454	/	-	0.944764
MSTRG.44076.1	MSTRG.44076	AUR62041905	AUR62041905-RA	salmon	Chr03	40081739	40085723	j	1140	/	-	0.951389
MSTRG.48613.1	MSTRG.48613	-	-	salmon	Chr03	74224258	74224921	u	664	LncRNA	-	0.956404
MSTRG.55796.3	MSTRG.55796	-	-	salmon	Chr04	38349220	38351480	u	1691	/	-	0.96238
AUR62026974-RA	MSTRG.56460	AUR62026974	AUR62026974-RA	salmon	Chr04	42503724	42510483	=	1143	/	-	0.985054
MSTRG.56474.1	MSTRG.56474	AUR62026971	AUR62026971-RA	salmon	Chr04	42596309	42598171	i	1863	LncRNA	-	0.991091
MSTRG.59617.1	MSTRG.59617	AUR62039187	AUR62039187-RA	salmon	Chr05	8496567	8497047	i	481	LncRNA	-	0.951366
MSTRG.73007.1	MSTRG.73007	-	-	salmon	Chr06	17180217	17181138	u	922	LncRNA	-	0.956465
MSTRG.88755.1	MSTRG.88755	-	-	salmon	Chr07	73450276	73450721	u	446	LncRNA	-	0.967785
MSTRG.89914.1	MSTRG.89914	-	-	salmon	Chr07	79251358	79252116	u	759	LncRNA	-	0.95972
MSTRG.94294.1	MSTRG.94294	AUR62001499	AUR62001499-RA	salmon	Chr07	101346601	101347124	x	524	LncRNA	-	0.965159
MSTRG.110861.7	MSTRG.110861	AUR62022373	AUR62022373-RA	salmon	Chr10	27259784	27266330	j	1253	/	-	0.98752
MSTRG.112472.1	MSTRG.112472	-	-	salmon	Chr10	44041483	44042447	u	965	LncRNA	-	0.989595
MSTRG.131360.1	MSTRG.131360	AUR62029381	AUR62029381-RA	salmon	Chr12	50546724	50547729	i	1006	LncRNA	-	0.987873
MSTRG.133514.1	MSTRG.133514	-	-	salmon	Chr13	3523846	3524738	u	893	/	-	0.984996
MSTRG.138052.1	MSTRG.138052	AUR62014156	AUR62014156-RA	salmon	Chr14	13317611	13322260	j	1789	/	-	0.979381
MSTRG.140886.1	MSTRG.140886	-	-	salmon	Chr14	41251899	41253905	u	2007	/	-	0.983702
MSTRG.142713.1	MSTRG.142713	-	-	salmon	Chr14	53233674	53234238	u	565	LncRNA	-	0.991625
MSTRG.142774.1	MSTRG.142774	AUR62005548	AUR62005548-RA	salmon	Chr14	53491089	53491407	x	319	LncRNA	-	0.995871
MSTRG.145099.3	MSTRG.145099	AUR62010127	AUR62010127-RA	salmon	Chr15	5593557	5596033	j	1017	LncRNA	-	0.939253
MSTRG.153214.1	MSTRG.153214	AUR62032987	AUR62032987-RA	salmon	Chr15	62066449	62069500	x	3052	LncRNA	-	0.967809
MSTRG.160361.1	MSTRG.160361	AUR62037059	AUR62037059-RA	salmon	Chr16	55035981	55041895	m	1533	/	-	0.989891
MSTRG.161323.2	MSTRG.161323	AUR62030508	AUR62030508-RA	salmon	Chr16	62506882	62511387	m	3105	/	-	0.89614
MSTRG.166295.1	MSTRG.166295	-	-	salmon	Chr17	16798317	16799171	u	855	LncRNA	-	0.971032
MSTRG.169260.1	MSTRG.169260	AUR62028544	AUR62028544-RA	salmon	Chr17	43919382	43921908	j	1058	/	-	0.9759
MSTRG.174537.1	MSTRG.174537	-	-	salmon	Chr17	76258245	76258685	u	441	LncRNA	-	0.969504
AUR62031793-RA	MSTRG.177642	AUR62031793	AUR62031793-RA	salmon	Chr18	13559726	13572034	=	1530	/	-	0.992924
MSTRG.180110.2	MSTRG.180110	AUR62009714	AUR62009714-RA	salmon	Chr18	27416896	27420737	j	1742	/	-	0.987916
AUR62021176-RA	MSTRG.1676	AUR62021176	AUR62021176-RA	skyblue3	Chr00	35433321	35438009	=	2308	/	-	0.88288
MSTRG.4695.1	MSTRG.4695	AUR62042998	AUR62042998-RA	skyblue3	Chr00	98744922	98745999	x	1078	/	C2H2	0.964089
MSTRG.6907.1	MSTRG.6907	AUR62017526	AUR62017526-RA	skyblue3	Chr00	135670426	135673042	j	1552	/	-	0.970926
AUR62040250-RA	MSTRG.10921	AUR62040250	AUR62040250-RA	skyblue3	Chr00	200302081	200308503	=	2469	/	-	0.940508
AUR62013350-RA	MSTRG.13842	AUR62013350	AUR62013350-RA	skyblue3	Chr01	20985851	20990158	=	2910	/	-	0.963966
MSTRG.16538.1	MSTRG.16538	-	-	skyblue3	Chr01	36396969	36404197	u	2208	/	-	0.914074
MSTRG.37361.1	MSTRG.37361	-	-	skyblue3	Chr02	47710382	47711640	u	1259	/	C2H2	0.895116
MSTRG.47315.1	MSTRG.47315	AUR62013443	AUR62013443-RA	skyblue3	Chr03	67030801	67031465	x	665	LncRNA	-	0.957588
AUR62014500-RA	MSTRG.48710	AUR62014500	AUR62014500-RA	skyblue3	Chr03	74748859	74749731	=	619	/	-	0.925783
MSTRG.58934.1	MSTRG.58934	AUR62015630	AUR62015630-RA	skyblue3	Chr05	3802003	3808329	m	1434	/	NAC	0.941358
AUR62034188-RA	MSTRG.63949	AUR62034188	AUR62034188-RA	skyblue3	Chr05	43006202	43008141	=	963	/	MYB	0.984772
MSTRG.69043.1	MSTRG.69043	-	-	skyblue3	Chr05	78695884	78696880	u	997	LncRNA	-	0.987847
MSTRG.73922.1	MSTRG.73922	AUR62041232	AUR62041232-RA	skyblue3	Chr06	23697294	23701812	o	1416	/	-	0.856319
MSTRG.87768.1	MSTRG.87768	AUR62001930	AUR62001930-RA	skyblue3	Chr07	68897950	68901436	m	1648	/	HSF	0.929372
MSTRG.89753.1	MSTRG.89753	AUR62015970	AUR62015970-RA	skyblue3	Chr07	78259159	78263507	m	1976	/	-	0.995911
AUR62001505-RA	MSTRG.94314	AUR62001505	AUR62001505-RA	skyblue3	Chr07	101440094	101442340	=	1346	/	-	0.992278
AUR62001822-RA	MSTRG.95171	AUR62001822	AUR62001822-RA	skyblue3	Chr07	104741544	104750167	=	2197	/	-	0.891024
MSTRG.97079.1	MSTRG.97079	AUR62011906	AUR62011906-RA	skyblue3	Chr08	2495556	2496359	x	804	LncRNA	-	0.902999
AUR62003880-RA	MSTRG.104514	AUR62003880	AUR62003880-RA	skyblue3	Chr09	7243213	7246936	=	1595	/	HSF	0.992595
MSTRG.122186.1	MSTRG.122186	AUR62035618	AUR62035618-RA	skyblue3	Chr11	60722389	60726224	m	2268	/	-	0.979918
MSTRG.124197.1	MSTRG.124197	AUR62040896	AUR62040896-RA	skyblue3	Chr12	94312	102353	j	1670	/	-	0.984577
MSTRG.131492.1	MSTRG.131492	AUR62029344	AUR62029344-RA	skyblue3	Chr12	51285972	51287983	m	1789	/	NAC	0.911591
AUR62007054-RA	MSTRG.133937	AUR62007054	AUR62007054-RA	skyblue3	Chr13	5652213	5655405	=	1571	/	-	0.887781
MSTRG.143110.1	MSTRG.143110	-	-	skyblue3	Chr14	55023097	55025267	u	1204	/	WRKY	0.955818
MSTRG.161670.2	MSTRG.161670	AUR62030422	AUR62030422-RA	skyblue3	Chr16	64783485	64788349	k	1591	/	-	0.997495
AUR62019918-RA	MSTRG.163135	AUR62019918	AUR62019918-RA	skyblue3	Chr16	72813864	72816583	=	1374	/	-	0.983974
MSTRG.163838.1	MSTRG.163838	AUR62018705	AUR62018705-RA	skyblue3	Chr16	76092162	76095890	j	1513	/	-	0.897425
AUR62008884-RA	MSTRG.172801	AUR62008884	AUR62008884-RA	skyblue3	Chr17	68086089	68091225	=	1975	/	-	0.967228
MSTRG.173267.1	MSTRG.173267	AUR62016457	AUR62016457-RA	skyblue3	Chr17	70287089	70289983	x	2895	LncRNA	-	0.896767
MSTRG.174760.1	MSTRG.174760	AUR62013239	AUR62013239-RA	skyblue3	Chr17	77443852	77446094	m	2243	/	-	0.956787
MSTRG.13270.1	MSTRG.13270	AUR62021436	AUR62021436-RA	thistle1	Chr01	17944278	17945938	m	1661	/	ERF	0.981245
MSTRG.17043.1	MSTRG.17043	AUR62021833	AUR62021833-RA	thistle1	Chr01	39115333	39119906	k	2628	/	GRAS	0.978408
MSTRG.17701.1	MSTRG.17701	AUR62039762	AUR62039762-RA	thistle1	Chr01	42590291	42592677	x	2387	LncRNA	-	0.965358
AUR62039762-RA	MSTRG.17702	AUR62039762	AUR62039762-RA	thistle1	Chr01	42590467	42591771	=	1305	/	-	0.984797
MSTRG.27538.3	MSTRG.27538	AUR62004263	AUR62004263-RA	thistle1	Chr01	117066563	117072611	k	4467	/	-	0.956386
MSTRG.33027.1	MSTRG.33027	AUR62040755	AUR62040755-RA	thistle1	Chr02	13849541	13853643	m	3781	/	-	0.844171
MSTRG.34869.2	MSTRG.34869	AUR62030153	AUR62030153-RA	thistle1	Chr02	29473571	29477064	j	2168	/	-	0.984969
MSTRG.35866.1	MSTRG.35866	AUR62029025	AUR62029025-RA	thistle1	Chr02	36403410	36405240	x	1831	LncRNA	-	0.982621
AUR62035199-RA	MSTRG.39953	AUR62035199	AUR62035199-RA	thistle1	Chr03	2411603	2415578	=	2146	/	-	0.994829
MSTRG.47061.1	MSTRG.47061	AUR62013508	AUR62013508-RA	thistle1	Chr03	65610923	65627388	j	2807	/	-	0.964498
MSTRG.48976.1	MSTRG.48976	AUR62012457	AUR62012457-RA	thistle1	Chr03	76084597	76086452	x	1856	LncRNA	-	0.99565
MSTRG.48991.1	MSTRG.48991	-	-	thistle1	Chr03	76189029	76190358	u	1330	LncRNA	-	0.983784
MSTRG.49440.2	MSTRG.49440	-	-	thistle1	Chr03	78310982	78313600	u	803	LncRNA	-	0.990866
MSTRG.58048.1	MSTRG.58048	AUR62032413	AUR62032413-RA	thistle1	Chr04	52745051	52746495	x	1445	LncRNA	-	0.99738
MSTRG.60054.1	MSTRG.60054	AUR62036162	AUR62036162-RA	thistle1	Chr05	11280640	11281575	x	936	/	ERF	0.954484
MSTRG.67433.1	MSTRG.67433	AUR62005103	AUR62005103-RA	thistle1	Chr05	70742440	70744574	x	2135	LncRNA	-	0.965791
MSTRG.90532.3	MSTRG.90532	AUR62026143	AUR62026143-RA	thistle1	Chr07	82399798	82404822	m	2071	/	-	0.991193
MSTRG.90786.1	MSTRG.90786	AUR62031434	AUR62031434-RA	thistle1	Chr07	83554302	83557636	j	2171	/	-	0.989031
MSTRG.93123.1	MSTRG.93123	AUR62001101	AUR62001101-RA	thistle1	Chr07	96130571	96132708	x	2138	LncRNA	-	0.952154
MSTRG.94988.1	MSTRG.94988	AUR62001765	AUR62001765-RA	thistle1	Chr07	104099350	104102348	x	2999	/	GRAS	0.99288
MSTRG.97344.1	MSTRG.97344	AUR62028601	AUR62028601-RA	thistle1	Chr08	3555351	3558653	k	3104	/	-	0.994969
MSTRG.104204.1	MSTRG.104204	AUR62003766	AUR62003766-RA	thistle1	Chr09	5869333	5873499	m	4167	LncRNA	-	0.96333
AUR62003765-RA	MSTRG.104205	AUR62003765	AUR62003765-RA	thistle1	Chr09	5869525	5871042	=	1326	/	-	0.999365
MSTRG.105347.1	MSTRG.105347	AUR62024666	AUR62024666-RA	thistle1	Chr09	11455952	11456781	x	830	LncRNA	-	0.984688
MSTRG.109905.2	MSTRG.109905	AUR62026763	AUR62026763-RA	thistle1	Chr10	20423757	20484458	k	1324	/	Dof	0.942204
MSTRG.123218.1	MSTRG.123218	AUR62028103	AUR62028103-RA	thistle1	Chr11	68788275	68795355	m	3069	/	NAC	0.974766
MSTRG.143396.2	MSTRG.143396	AUR62005741	AUR62005741-RA	thistle1	Chr14	56218716	56224574	j	1973	/	-	0.986006
MSTRG.162591.2	MSTRG.162591	AUR62015563	AUR62015563-RA	thistle1	Chr16	70024633	70029430	j	1292	/	-	0.966645
AUR62018879-RA	MSTRG.163390	AUR62018879	AUR62018879-RA	thistle1	Chr16	73940816	73942996	=	813	/	ERF	0.987346
MSTRG.166579.2	MSTRG.166579	-	-	thistle1	Chr17	20540063	20542154	u	688	LncRNA	-	0.961353
