# Supplementary material for: Transcriptome dynamics uncovers long non-coding RNAs response to salinity stress in Chenopodium quinoa
Source: Front Plant Sci. 2022 Sep 20;13:988845. doi: 10.3389/fpls.2022.988845 (PMC9530330; doi:10.3389/fpls.2022.988845)
Supplement: Supplementary file 7 [file Table_7.XLSX]

## Sheet: Sheet1
Table S7 Primer sequences for qRT-PCR
ID	Forward primer	Length	Tm	Reverse primer	Length	Tm
MSTRG.104204.1	CCACATTCTTCGGTTCAC	18	59.8	CAGCAGTAACAGGAGTAGT	19	60
MSTRG.104897.1	CTTCTGACTTGTGCTCTTG	19	60	CTCTTCTGTCTTCTCTTGTTC	21	59.7
MSTRG.106408.1	TGTATTGTAGCGGCAGAG	18	60.6	CATTCACCCACTTGTTTCAT	20	60.4
MSTRG.108326.1	TCTATGACTTGCTTGCCTAA	20	60.5	GTGCCATCGTATCTGACT	18	60.3
MSTRG.10072.1	ATCGGTGTTCTTGGACTT	18	60	TAGGATTGGCTGTGTTAGG	19	60.3
MSTRG.100884.1	CGGTTATGGCACAAGAAG	18	59.9	CTGAATTTCGTCGGTAGC	18	59.7
MSTRG.101011.1	TCACGATCATCATCACCAT	19	60.1	ATAGCAACAAAGTTTAGCCATA	22	59.9
MSTRG.103857.1	GCTGGAGTCACAACTACT	18	60	TGGCTGTTGAGACTAAGAA	19	59.8
MSTRG.101125.1	ACTCCAACACATCCTCAAT	19	60.2	AGGTTAAGGTGAAGCAAGA	19	60.1
MSTRG.101663.1	TCTTGGTTCATCCTCACTAA	20	59.7	TCCTCGTATTGTTGATAATCTG	22	59.5
MSTRG.103114.1	CATACGCTTCCTCTTCCT	18	59.9	GGCTAGTTCAAGTTCATCTG	20	60
AUR62020767(EF1a)	GTACGCATGGGTGCTTGACAAACTC	25	59.8	ATCAGCCTGGGAGGTACCAGTAAT	24	60.2
