# Supplementary material for: Transcriptome dynamics uncovers long non-coding RNAs response to salinity stress in Chenopodium quinoa
Source: Front Plant Sci. 2022 Sep 20;13:988845. doi: 10.3389/fpls.2022.988845 (PMC9530330; doi:10.3389/fpls.2022.988845)
Supplement: Supplementary file 8 [file Table_8.XLSX]

## Sheet: Sheet1
Table S8. Blast alignment results of predicted LncRNAs with full-length cDNA sequences.
Predicted LncRNA	full-length cDNA	% identity	alignment length	mismatches	gap openings	q. start	q. end	s. start	s. end	e-value	bit score	CPC2
MSTRG.102918.1	SRR14414933.245622	99.71	701	0	2	23	723	280	978	0	1372	noncoding
MSTRG.104897.1	SRR14414933.67250	100	885	0	0	154	1038	959	75	0	1754	noncoding
MSTRG.108326.1	SRR14414933.11247	100	1226	0	0	26	1251	1294	69	0	2389	noncoding
MSTRG.112969.1	SRR14414933.25911	100	2052	0	0	23	2074	2158	107	0	3931	noncoding
MSTRG.113509.1	SRR14414933.2191493	93.55	543	29	4	198	737	756	217	0	793	noncoding
MSTRG.114655.1	SRR14414933.48156	99.8	510	1	0	444	953	818	309	0	955	noncoding
MSTRG.115361.1	SRR14414933.130164	82.57	1228	173	39	83	1290	360	1566	0	696	noncoding
MSTRG.117006.1	SRR14414933.319152	92.94	609	29	6	26	626	780	178	0	852	noncoding
MSTRG.123184.1	SRR14414933.3061889	99.69	326	0	1	2125	2450	838	514	3e-173	601	noncoding
MSTRG.123232.1	SRR14414933.422306	98.5	601	0	8	439	1039	528	1119	0	985	noncoding
MSTRG.125386.1	SRR14414933.7753	97.52	927	2	21	748	1662	1011	94	0	1633	noncoding
MSTRG.125496.1	SRR14414933.212932	100	552	0	0	28	579	1	552	0	1053	noncoding
MSTRG.126034.1	SRR14414933.133103	100	1193	0	0	24	1216	2304	1112	0	2323	noncoding
MSTRG.14047.1	SRR14414933.46714	100	791	0	0	579	1369	1151	361	0	1568	noncoding
MSTRG.18109.1	SRR14414933.1546	100	745	0	0	57	801	106	850	0	1477	noncoding
MSTRG.1925.1	SRR14414933.221957	95.34	1544	2	63	438	1978	1811	335	0	2420	noncoding
MSTRG.19388.1	SRR14414933.38918	95.12	553	23	4	428	978	717	167	0	878	noncoding
MSTRG.27176.1	SRR14414933.157555	99.81	529	0	1	176	703	131	659	0	1039	noncoding
MSTRG.35866.1	SRR14414933.8456	100	950	0	0	24	973	1826	877	0	1883	noncoding
MSTRG.39412.1	SRR14414933.85803	100	1108	0	0	56	1163	3	1110	0	2095	coding
MSTRG.42934.1	SRR14414933.11403	99.95	1926	0	1	210	2135	604	2528	0	3719	noncoding
MSTRG.4695.1	SRR14414933.1036589	100	654	0	0	303	956	198	851	0	1296	noncoding
MSTRG.47733.1	SRR14414933.9428	100	1152	0	0	31	1182	1295	144	0	2194	noncoding
MSTRG.47736.1	SRR14414933.34662	100	1166	0	0	56	1221	8	1173	0	2270	noncoding
MSTRG.47739.1	SRR14414933.15501	100	1140	0	0	24	1163	1174	35	0	2260	noncoding
MSTRG.47742.1	SRR14414933.5766	100	927	0	0	32	958	1097	171	0	1838	noncoding
MSTRG.49012.1	SRR14414933.214191	100	739	0	0	56	794	1	739	0	1465	noncoding
MSTRG.49586.1	SRR14414933.7823	100	329	0	0	19	347	1030	702	0	652	noncoding
MSTRG.49859.1	SRR14414933.44773	95.4	1457	58	6	342	1790	409	1864	0	2305	noncoding
MSTRG.50169.1	SRR14414933.224368	100	746	0	0	23	768	1195	450	0	1479	noncoding
MSTRG.50658.1	SRR14414933.16578	99.2	1631	1	3	107	1737	2053	435	0	3118	noncoding
MSTRG.51772.1	SRR14414933.23804	92.67	1365	51	34	81	1424	1519	183	0	1800	noncoding
MSTRG.67433.1	SRR14414933.125553	92.69	1327	71	13	24	1331	2004	685	0	1836	noncoding
MSTRG.67849.1	SRR14414933.167534	100	1172	0	0	56	1227	978	2149	0	2323	noncoding
MSTRG.6912.1	SRR14414933.3921518	98.45	1290	1	19	246	1531	319	1593	0	2379	noncoding
MSTRG.69185.1	SRR14414933.38671	100	1432	0	0	47	1478	1519	88	0	2839	noncoding
MSTRG.78357.1	SRR14414933.1932573	100	604	0	0	346	949	1136	533	0	1197	noncoding
MSTRG.832.1	SRR14414933.3967502	94.34	884	44	5	23	901	889	7	0	1350	noncoding
MSTRG.86694.1	SRR14414933.179388	100	1175	0	0	58	1232	98	1272	0	2329	noncoding
MSTRG.89487.1	SRR14414933.50993	100	1489	0	0	410	1898	1569	81	0	2952	noncoding
MSTRG.89849.1	SRR14414933.2141016	100	810	0	0	24	833	810	1	0	1606	noncoding
MSTRG.90259.1	SRR14414933.772423	99.87	746	0	1	57	801	746	1	0	1469	noncoding
MSTRG.91390.1	SRR14414933.41308	99.88	818	1	0	57	874	245	1062	0	1580	noncoding
MSTRG.91444.1	SRR14414933.31212	100	805	0	0	143	947	1	805	0	1596	noncoding
MSTRG.94391.1	SRR14414933.127362	91.74	1005	58	16	53	1052	137	1121	0	1308	noncoding
MSTRG.94561.1	SRR14414933.34028	100	458	0	0	58	515	984	1441	0	908	noncoding
MSTRG.94988.1	SRR14414933.19709	100	2631	0	0	199	2829	2701	71	0	5138	noncoding
